# Supplementary material for: Depletion-dependent activity-based protein profiling using SWATH/DIA-MS detects serine hydrolase lipid remodeling in lung adenocarcinoma progression
Source: Springer Nature journal article supplement (doi:10.1038/s41467-025-59564-x), 2025-05-27
Supplement: MOESM1 [file 41467_2025_59564_MOESM1_ESM.pdf]

# Supplementary figures and legends

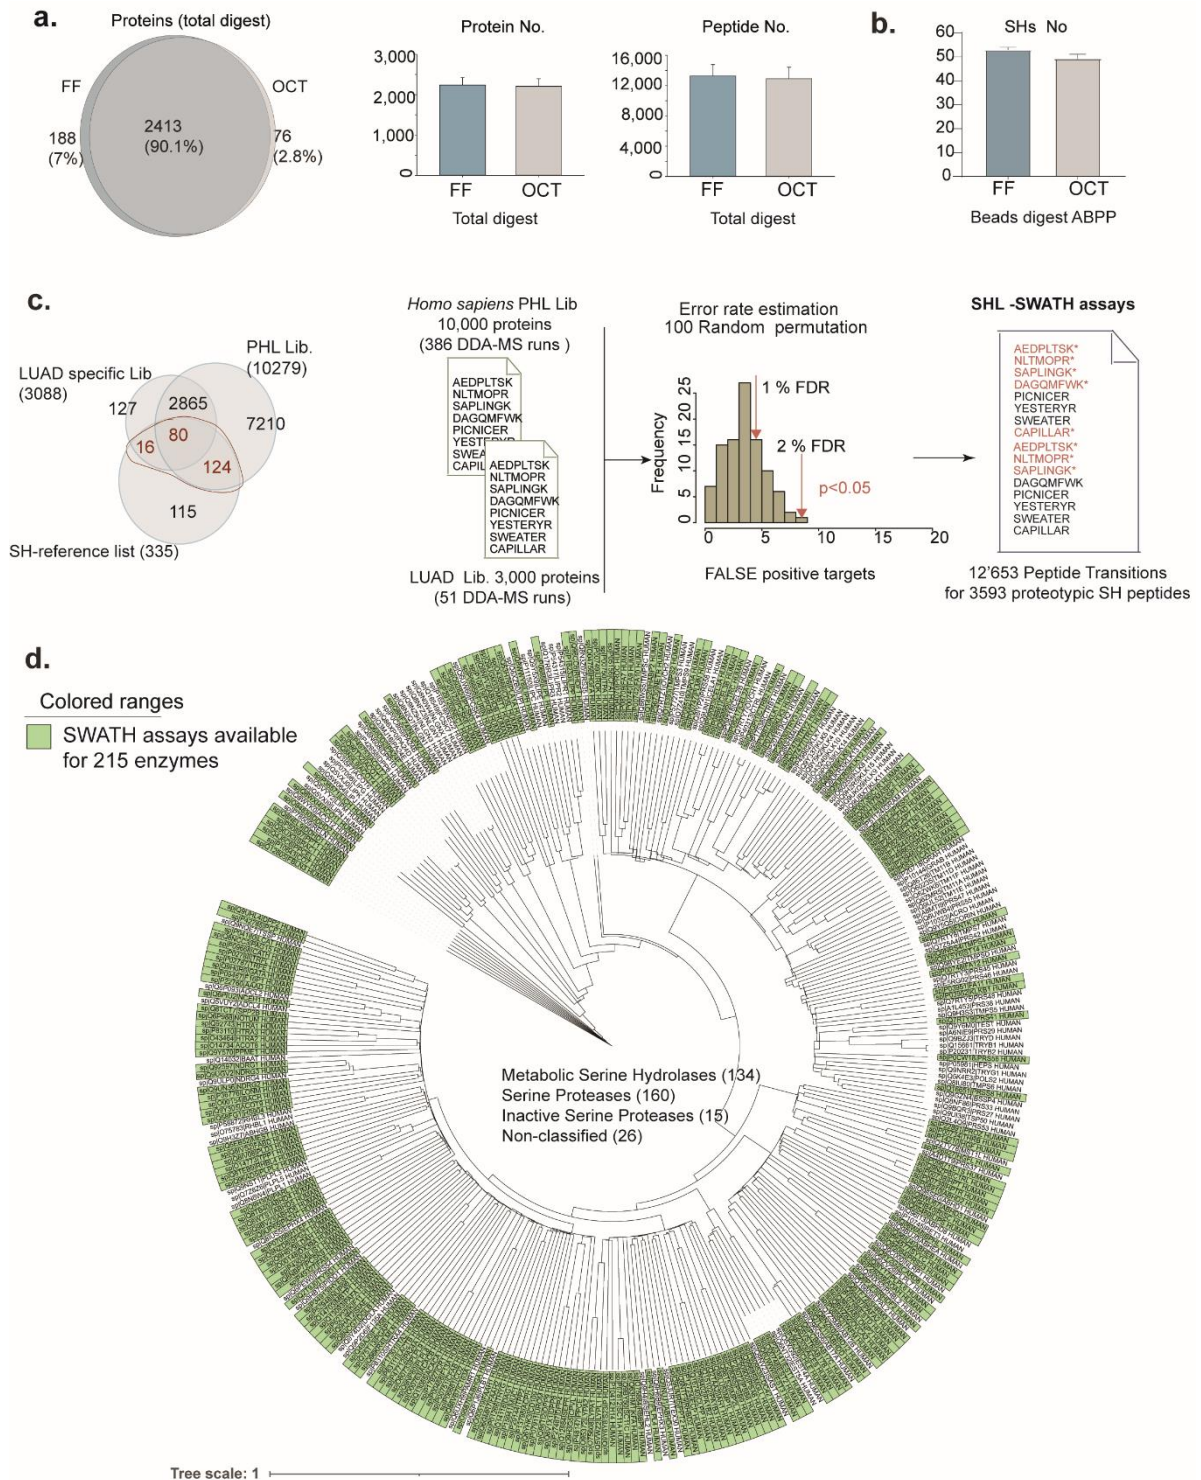

**Supplementary Fig. 1. Comparison of dd-ABPP extraction protocol on frozen and OCT-embedded lung tissue and summary of SH-targeted DIA library (SHL) generation for human tissues.**

**a**, Venn diagram shows overlap of protein identification between sample types, frozen (FF) and OCT-embedded lung tissue. Barplots with corresponding standard error (n=2-4) represent the number of proteins and peptides identified from FF and OCT-embedded tissue, respectively. **b**, Barplots with corresponding standard error (n=2-4) represent the number of captured enzymes in beads digest. **c**, Venn diagram shows overlap of SH identification (reference list of 335 SHs) between different human libraries. LC-MS peptide transition assays per SH protein were available from a deposited library of human tissue derived peptides (PHL or *Homo sapiens* library) or were generated from LUAD sample library (i.e., > 400 MS runs). The error rate distribution (i.e., number of FALSE positive (FP) targets) of new hybrid SHL was tested from 100 random combinations of two hypothetically created libraries of similar size to two combined libraries (adjusted to 1% FDR) and was estimated below 2% FDR. Final SHL library included 12653 peptide transition groups for 3593 proteotypic SH peptides (i.e. 215 enzymes, Supplementary Data 1). **d**, A phylogenetic tree of 327 out of 335 SH family members of which 294 (i.e. 160 serine proteases and 134 metabolic serine hydrolases) are annotated-, 15 human inactive-, and 26 non-annotated cases (non-classified cases, see Methods: phylogenetic tree). Light green boxes depict 64% (i.e., 215 proteins of which 191 annotated SH enzymes) of all cases for which LC-MS assays are available in SHL. Source data Figure 1.

**a.** Internal Standard Peptides (ISPs) selection:

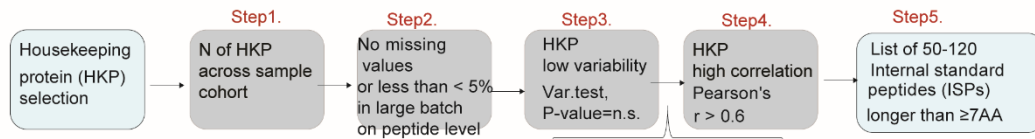

Human Protein Atlas

- Ribosomal
- RNA polymerase
- Citric acid cycle
- Cytoskeleton

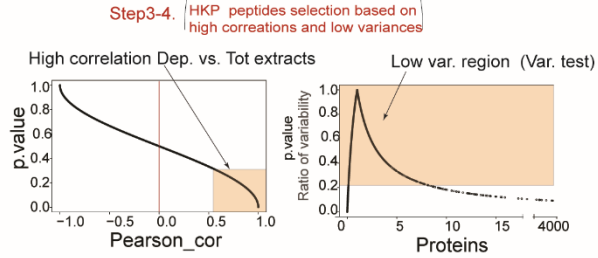

**b.** Comparison of Normalization methods

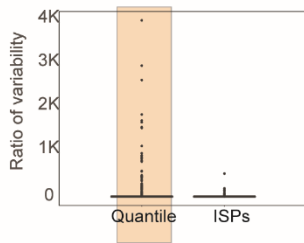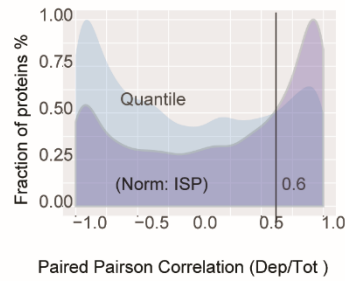

**c.**

KS-distance test, P value  $\leq 0.05$

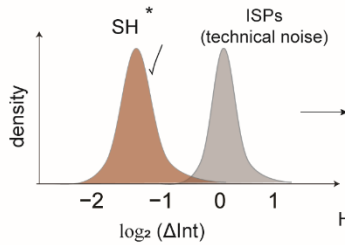

$$SH_{RADDi} = \frac{\sum_{i=1}^k RADDi}{k} \quad (*)$$

$k = \text{number of observations}$

Ha: cdf ISP:  $\log_2(\Delta Int) >$  ecdf SH:  $\log_2(\Delta Int)$

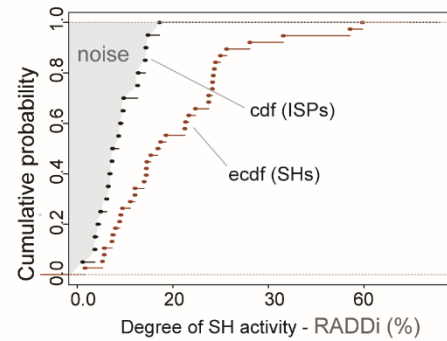

**Supplementary Fig. 2. Procedure for normalization of measurement variability between total (Tot) and depleted (Dep) paired tissue extracts.**

**a**, Five-fold selection criteria (step1-5) to obtain the list of stable endogenous ISPs (see Methods) of housekeeping (HK) and cytoskeletal (CS) proteins. In step 3-4, we aim to select the HK/CS proteins with low variability and high correlation between paired extracts. Density plot represents distribution of P-value (right panel) and Pearson correlation coefficient (Pearson cc test for paired samples, left panel) computed between paired extracts for each detected protein. P-value from F-test used to compare individual variances of proteins between Dep and Tot extracts (Ratio of variability, right panel). Orange box depicts area that corresponds to high correlations and low variances across paired extracts. **b**, ISPs reduce the technical noise variability between paired extracts of the same biological origin to optimize the detection of differences due to enzyme depletion. Comparison of ISP-normalization to Quantile. Left panel: Boxplot of variability ratio between Dep and Tot extract, after ISPs and Quantile normalization. Orange box depicts the higher protein variability (left) with Quantile normalization. Right panel: Density plots represent distribution of Pearson cc (paired) for each detected protein after ISPs (violet) and after Quantile (blue) normalization (right). **c**, The empirical depletion ratio of each detected SH enzyme was assessed from its SWATH/DIA-MS fragment ion intensity differences (i.e.,  $\log_2\Delta\text{Int}$ ) of paired samples and was used to compute the enzyme RADDi. On the left: The Kolmogorov–Smirnov (KS) statistic with one-sided P-value  $\leq 0.05$  was used to select confident “active” SH enzymes. The distribution shift of empirical SH depletion ratio ( $\log_2\Delta\text{Int}$ ) was compared with ISPs reference distribution (technical noise) with an alternative hypothesis ( $H_a$ ) that the cumulative distribution function (CDF) of ISP lies above that of empirical CDF of SH (Methods). On the right: The plot represents CDF of active enzyme fractions wherein each dot corresponds to respective SH average activity (i.e., RADDi) within the tested condition. The  $k$  corresponds to the number of observations (samples) per condition. Enzyme activity or RADDi value was set to 0 if its depletion value fell within the defined noise range (gray area).

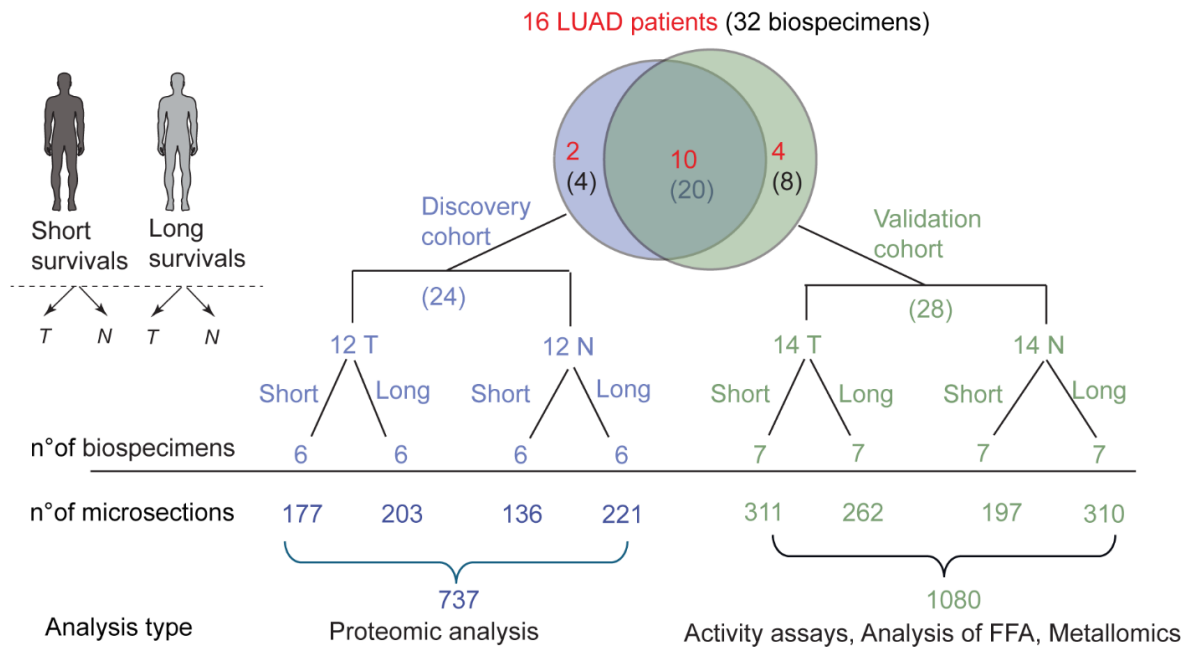

**Supplementary Fig. 3. Number of patients, biospecimens, and microsections in each cohort, discovery cohort, and validation cohort.**

Venn diagram depicting the number of patients, biospecimens, and microsections in the discovery cohort (left) and validation cohort (right). In total, we collected 32 tumors and adjacent tissues from 16 patients with LUAD type IIIA adenocarcinoma, 8 of which had only 1-year overall survival. For the initial proteomic analysis, we used 24 (out of 32) samples and processed 203 and 221 sections from 6 tumors and 6 non-tumors of long-term survival patients and 177 and 136 sections from 6 tumors and 6 non-tumors of short-term survival patients, respectively. For validation, we collected an additional set of 1080 cryostat sections covering 28 tumor and adjacent tissues from 14 LUAD patients, ten of which were also analyzed within the original discovery cohort and four were independent. The type of analysis performed on each sample set is reported.

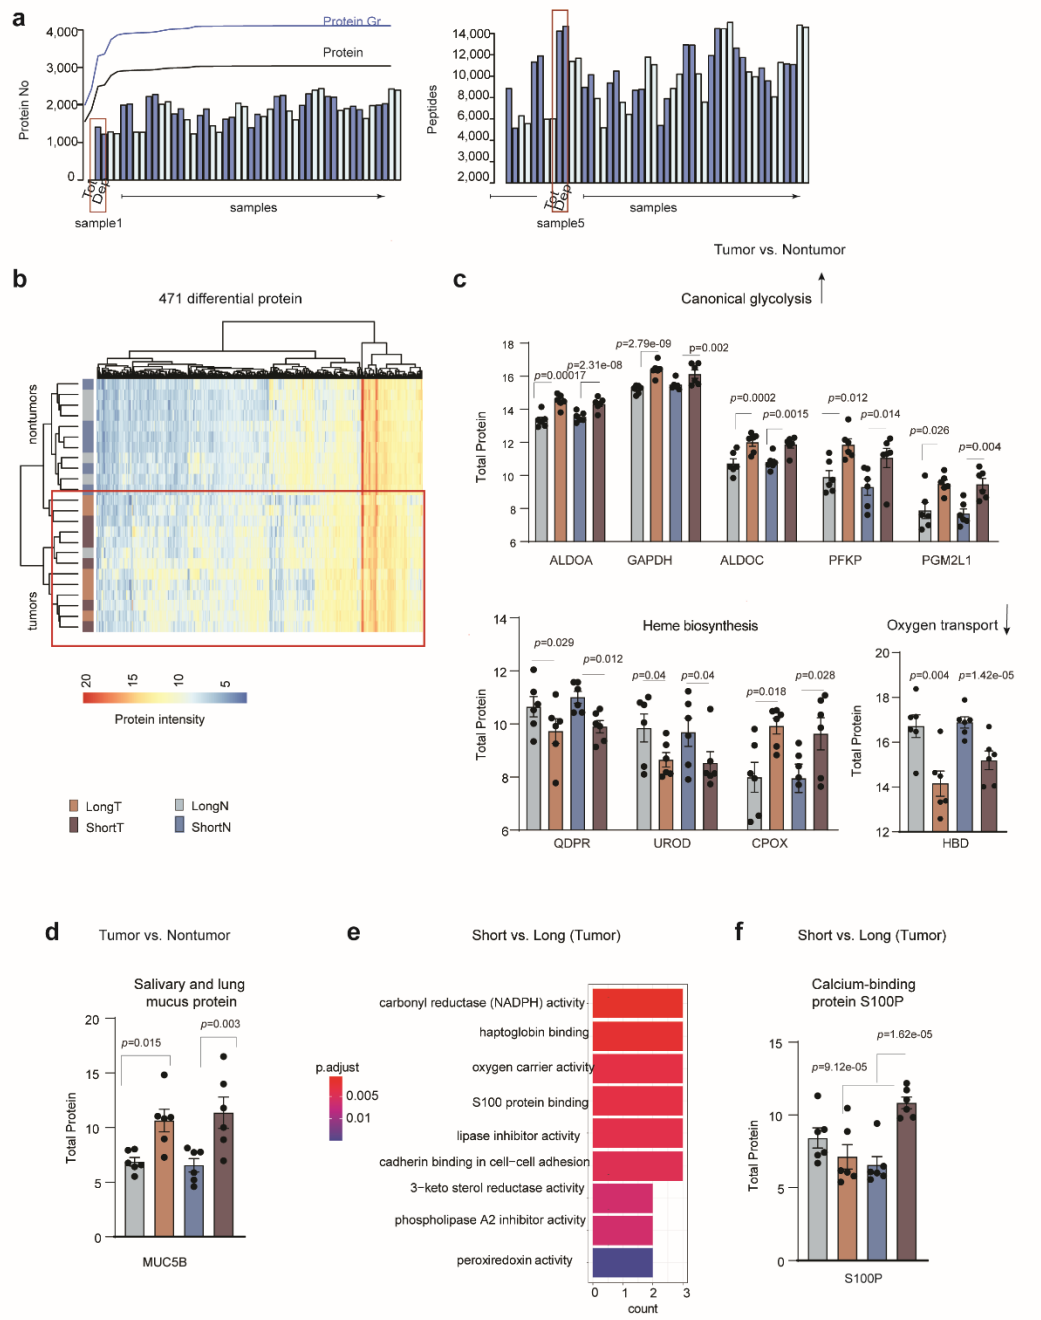

#### Supplementary Fig. 4. Standard proteome analysis of LUAD cohort.

**a**, MS analysis shows consistent numbers of peptides and proteins detectable per each single sample pair of depleted (Dep) and total (Tot) extract. Solid line is the cumulative frequency number of unique proteins and/or protein groups over the experiment at an estimated false discovery rate (FDR) of 0,1% at peptide level. **b**, Heat map visualization of differentially expressed proteins. Manhattan distances used for hierarchical clustering. Differential expression analysis applied on proteins selected by PLS-DA (variate 1-2-3) and analysis adjusted for common confounders (i.e., age, gender, smoking status of participants). **c**, Differential expressions of proteins in tumor versus nontumor comparison: canonical glycolysis, oxygen transport, heme biosynthesis. **d**, Tumor expression of salivary gland specific protein Muc5B. **e**, GO enriched molecular function (MF) of proteins changed in survival-subtype tumor comparison. Functional enrichment GO analysis BH-adjusted P-value corresponds to two-sided Fisher's exact test. All genes in *Homo sapiens* database are used as reference list. **f**, Tumor expression of Calcium-binding protein S100P. Two-sided P-value from GLM (family = Gaussian), accounted for age, sex and smoking status (**c**, **d**, **f**). Post hoc analysis multiple comparison BH FDR-adjusted P-value  $\leq 0.05$  is considered significant. Color codes correspond to sample classes annotated in figure legend. Barplots with data points shown in (**c**, **d**, **f**) are mean values +/- SEM. Total protein on y-axis is log<sub>2</sub> protein abundance. Source data are provided as a Source Data file.

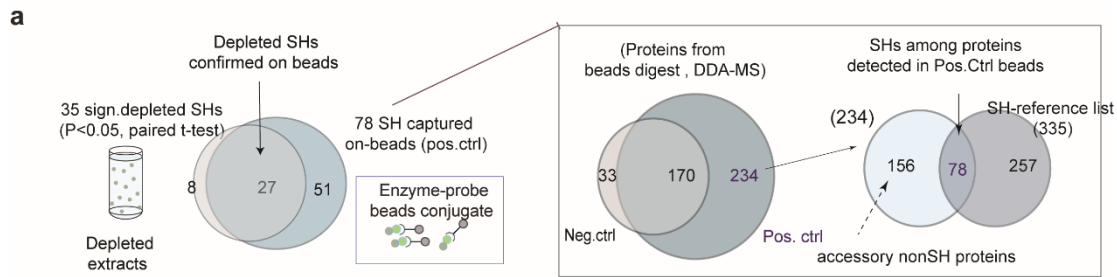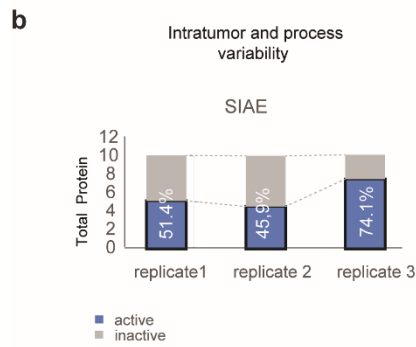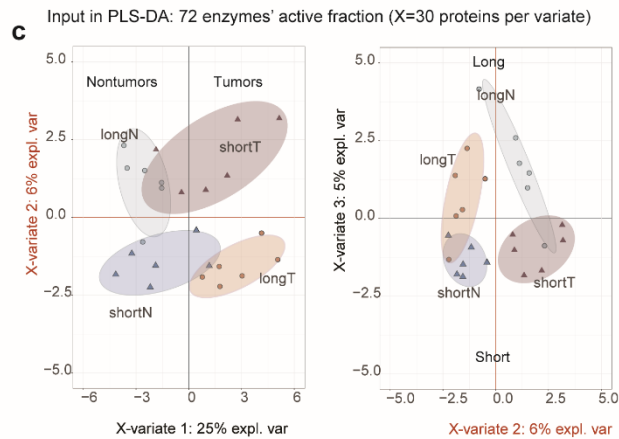

**d** Output in PLS-DA: 64 enzymes

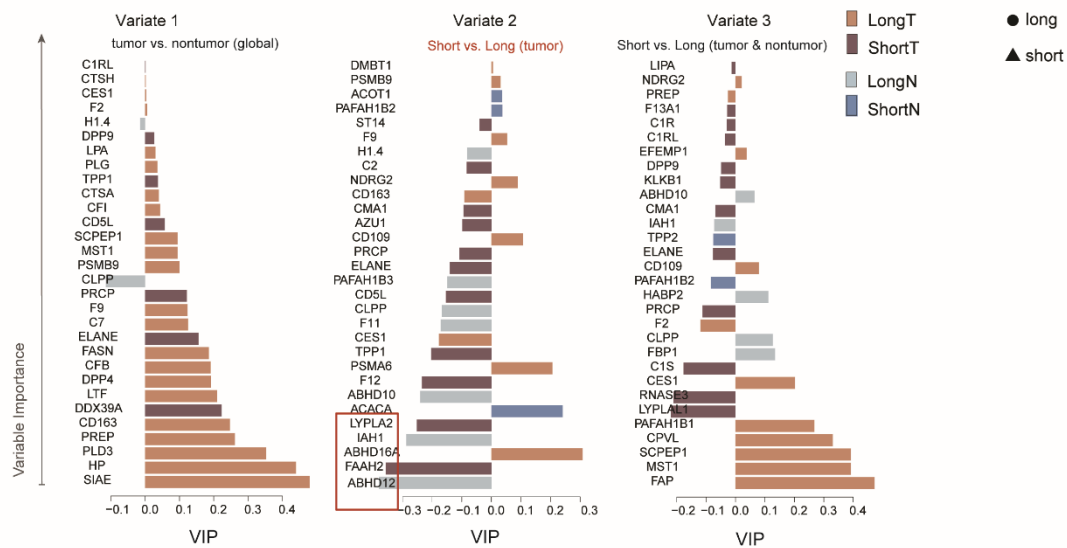

**Supplementary Fig. 5. Percentage of active SH forms alter across LUAD groups.**

**a**, Left panel: Venn diagram overlaps depict number of significantly depleted SHs (i.e., 27/35) confirmed with orthogonal beads experiment. Right panel: Venn diagrams from orthogonal experiment represent SHs enriched on avidin beads after incubation with FP-probe (Pos. ctrl) or DMSO reaction solvent (Neg. ctrl). Of 234 cases detected on Pos. ctrl, we confirm detection of 78 assigned SH enzymes. **b**, Degree of SIAE activity across three independent extracts of spatially separated tumor tissue cuts. **c**, Supervised PLS-DA classification analysis based on active SH fractions. Class separation based on latent variate 1 and 2, and latent variate 2 and 3. Limited number of features per component (N=30). **d**, Features contribution via VIP score to PLS-DA latent variate 1, 2 and 3. Color codes correspond to sample classes annotated in legend.

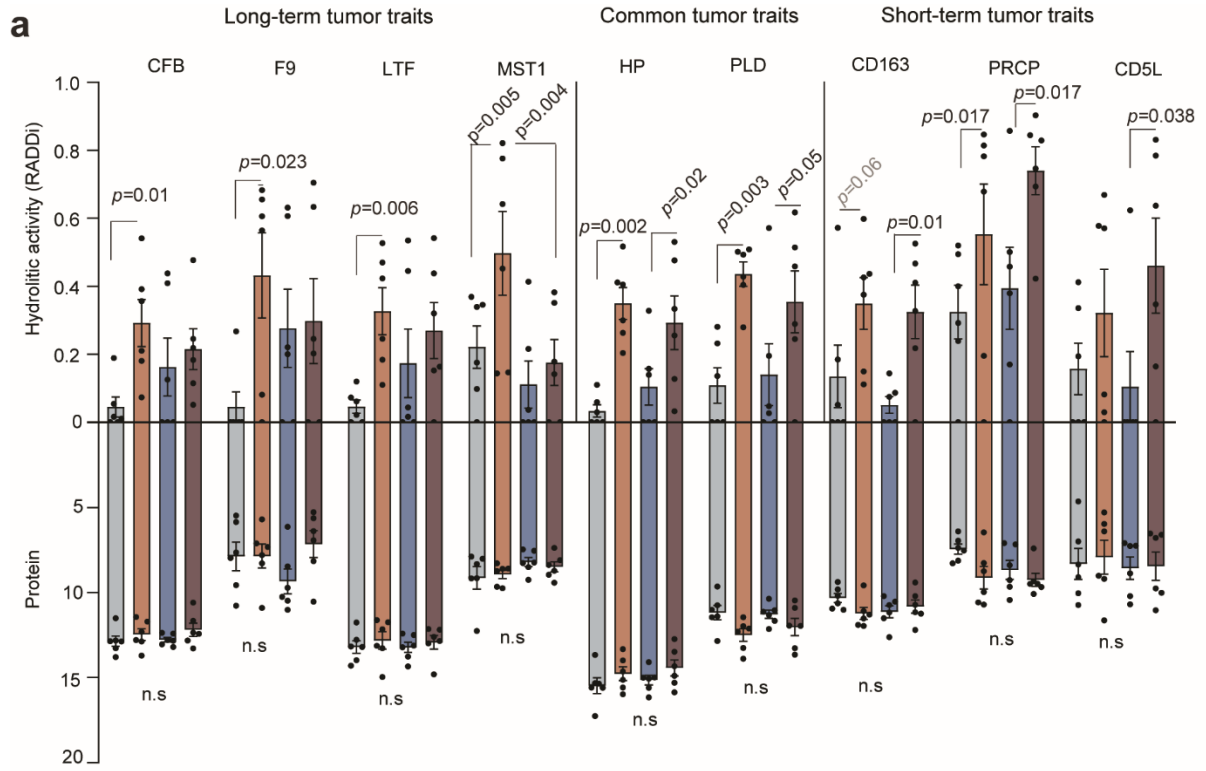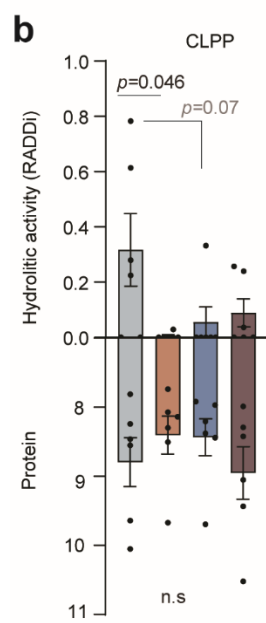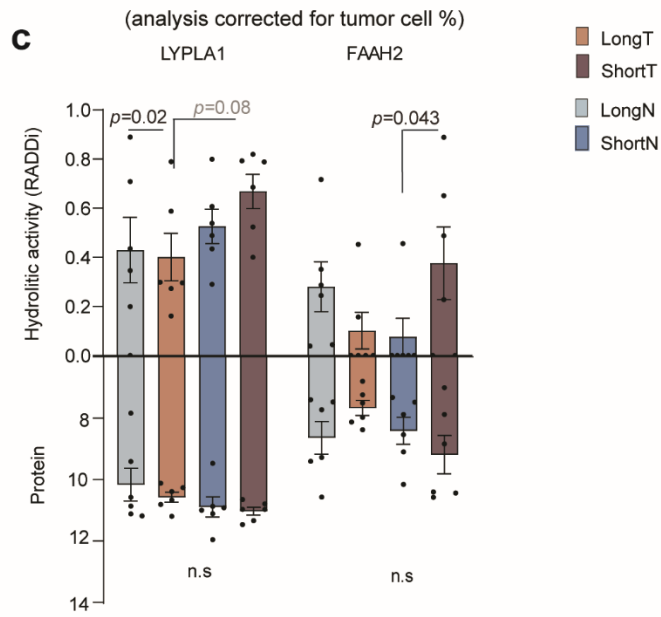

**Supplementary Fig. 6. Profiling of SH activity in LUAD clinical cohort.**

**a-b**, Barplots represent tumors' total and active fractions of dysregulated SHs. **a**, SHs that altered percentage of active fraction in tumors compared with adjacent nontumor tissues with LUAD survival subtype specificity. **b**, Barplot of CLPP active fractions. Two-sided P-value is the confounder-adjusted GLM (quasibinomial model) for age, gender, and smoking status of patients (**a-b**). **c**, Barplots of novel hits LYPLA1 and FAAH2 after analysis adjustment for percentage of tumor cells. Two-sided P-value of novel hits corresponds to GLM analysis (quasibinomial model) accounting for percentage of tumor cells estimated per tumor tissue cut (Supplementary Table 1). Barplots with data points (n=6 samples/per group) shown in (**a, b, c**) are mean values +/- SEM. Color codes correspond to conditions annotated in figure legend. Source data are provided as a Source Data file.

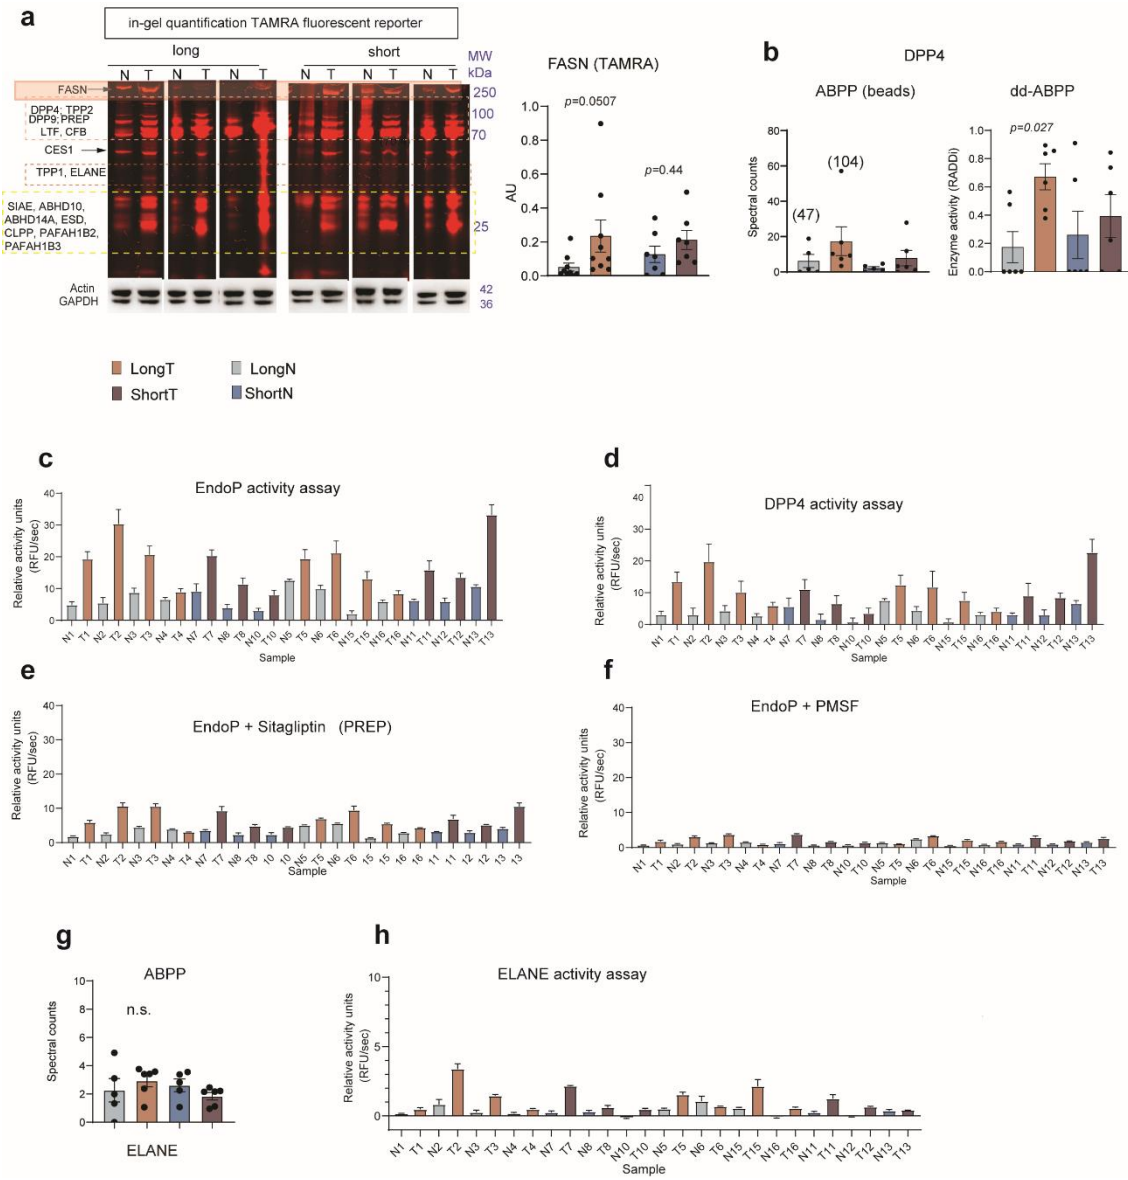

### Supplementary Fig. 7. Validation experiments by orthogonal methods.

**a**, Fluorescent image shows labeled gel-separated proteome and corresponding SHs detected by SC with in-gel proteomic digestion. SHs detected in-gel proteomic workflow annotated at side of image. Barplots of FASN represent activity status estimated via in-gel quantification and normalization to actin loading control. Two-sided p-value from Kruskal-Wallis test followed by Dunn's multiple comparisons adjustment. **b**, Barplots of DPP4 represent activity status of enzymes across LUAD groups estimated by novel dd-ABPP (n=6 per/group) and conventional ABPP via SC averaging (n=5 for LongN and ShortN; n=6 for LongT and ShortT). Barplots are presented as mean values +/- SEM. **c**, Barplots of individual samples corresponding to EndoP activity evaluated by functional assays. **d**, Barplots of individual samples corresponding to DPP4 activity evaluated by functional assays. **e**, Barplots of individual samples corresponding to residual activity after sitagliptin inhibition, reflecting other prolyl endopeptidases than DPP4, mostly PREP. Of note, PREP was among the strongest hits in dd-ABPP screen. **f**, PMSF inhibition test to confirm specificity of detected signals and confirm their attribution to serine protease family. **g**, The SC data of ELANE from LUAD conditions in ABPP analysis. Barplots are presented as mean values +/- SEM. (n=5 for LongN and ShortN; n=6 for LongT and ShortT) **h**, Individual sample records from ELANE activity assay. Color codes correspond to conditions annotated in figure legend. Source data are provided as a Source Data file.

**a**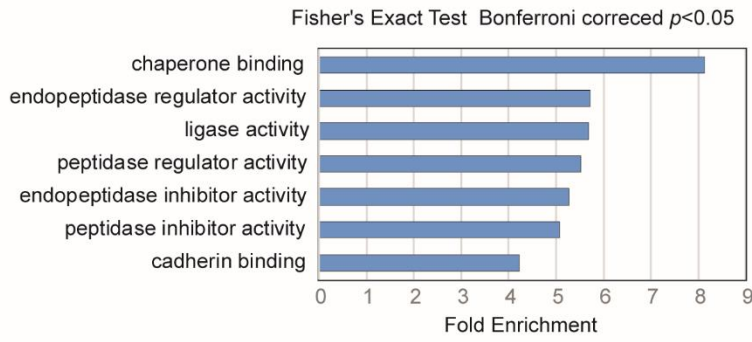**b**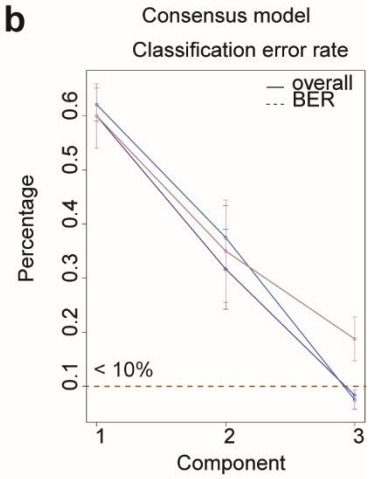**c**

Tumor of aggressive LUAD (consensus network)

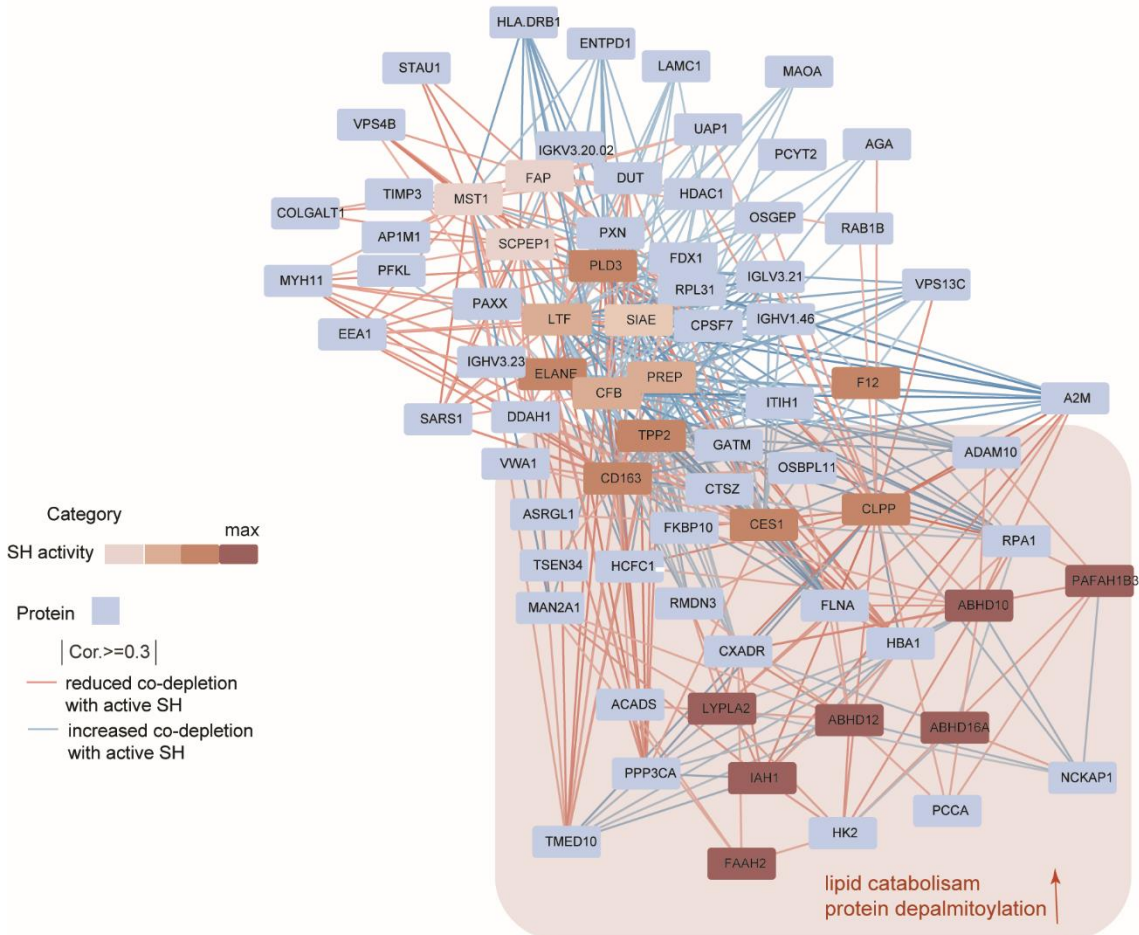

**Supplementary Fig. 8. Comprehensive interaction networks of catalytic enzymes discriminate LUAD survival subtypes.**

**a**, PANTHER Overrepresentation Test for GO analysis of molecular function conducted on 258 co-depleted proteins 1<sup>st</sup> degree SH interactors. Bonferroni adjusted  $p$ -value $<0.05$  corresponds to two-sided Fisher's exact test. All genes in Homo sapiens database are used as reference list. **b**, Consensus model performance error rate estimated by 5-fold cross-validation schema. Model selected via block sPLS-DA analysis conducted on 64 SHs and 388 co-depleted proteins. Block PLS-DA selects variables based on its i) maximum covariance between integrated data levels, and ii) ability to discriminate between sample classes. **c**, Network of selected SHs and proteins extracted from consensus model (82 features) that correlates above selected cor. cut-off (i.e.,  $|\text{cor}| > 0.3$ ). Proteins and respective enzymes cluster according to functional properties. Source data are provided as a Source Data file.

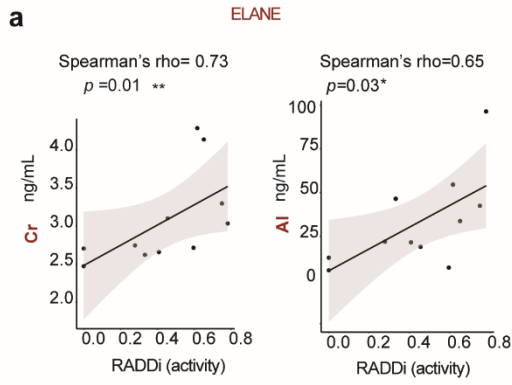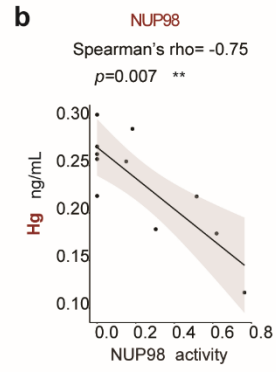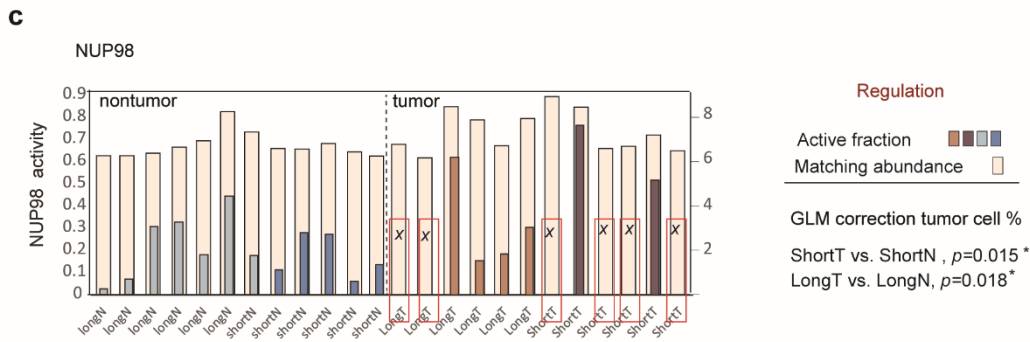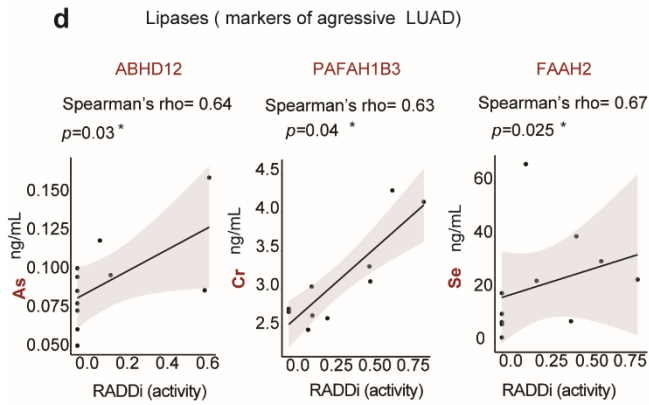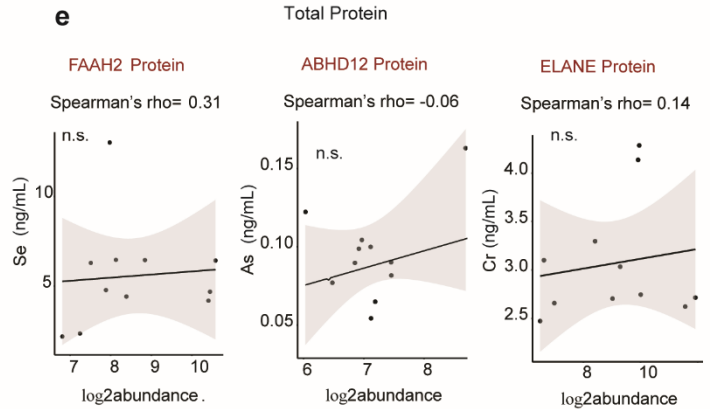

**f**

The top SHs with non-synonymous mutation in KRAS LUAD TCGA

| Protein name | Number of patients with a non-synonymous mutation | Frequency of mutations (number of mutations divided with a gene length) | %patients with non-synonimus SH mutation in LUAD | Number of mes the patient with the mutation also had a KRAS mutation | Number of patients that also had a KRAS mutation divided by all patients with a mutation | Fraction of patients with non-synonimus SH mutation in KRAS LUAD |
|--------------|---------------------------------------------------|-------------------------------------------------------------------------|--------------------------------------------------|----------------------------------------------------------------------|------------------------------------------------------------------------------------------|------------------------------------------------------------------|
| DMBT1        | 15.00                                             | 0.01                                                                    | 0.07                                             | 7.00                                                                 | 0.47                                                                                     | 0.097                                                            |
| LPA          | 16.00                                             | 0.00                                                                    | 0.07                                             | 7.00                                                                 | 0.44                                                                                     | 0.097                                                            |
| PCSK5        | 6.00                                              | 0.00                                                                    | 0.03                                             | 5.00                                                                 | 0.83                                                                                     | 0.069                                                            |
| DPP10        | 8.00                                              | 0.01                                                                    | 0.03                                             | 5.00                                                                 | 0.62                                                                                     | 0.069                                                            |
| NUP98        | 8.00                                              | 0.00                                                                    | 0.03                                             | 4.00                                                                 | 0.50                                                                                     | 0.056                                                            |
| F9           | 9.00                                              | 0.02                                                                    | 0.04                                             | 4.00                                                                 | 0.44                                                                                     | 0.056                                                            |
| PNLIPRP1     | 6.00                                              | 0.01                                                                    | 0.03                                             | 3.00                                                                 | 0.50                                                                                     | 0.042                                                            |

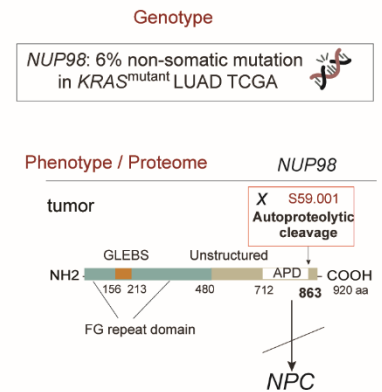

**Supplementary Fig. 9. Tumor heterogeneity interferes with SH enzyme catalysis.** **a**, Two scatter plots with 95% confidence intervals represent Spearman rho correlations of tumor contents of Cr and Al ions (ng/mL), and the active protease fraction of ELANE, respectively. **b**, Scatter plot of NUP98 activity correlation with Hg ion tumor content. **c**, Barplots with sample color code represent an active fraction of NUP98 estimated per individual sample. Red square depicts samples with missing NUP98 active fraction. Background barplots in light pink color represent protein expression of NUP98 per individual sample. Two-sided P-value from GLM adjusted for cell-count percentage per sample (see Supplementary Table 1) **d**, Scatter plots with 95% confidence intervals represent Spearman rho correlations of tumor contents of As, Cr, Se ions (ng/mL), and the active SHs' fraction of ABHD12, PAFAHB1B3, FAAH2, respectively. **e**, Representative scatter plots with Spearman correlation of measured total protein content of FAAH2, ABHD12 and ELANE along with lung concentration for Se, As, and Cr. **f**, Table of top serine hydrolases that show higher rate (>4%) of non-synonymous gene mutation across KRAS LUAD TCGA atlas. Percentage depicts fraction of patients with non-synonymous NUP98 mutations in KRAS mutated LUAD (TCGA). On the right: Domain architecture of human Nup98 protein of 98 kDa. Lack of autoproteolytic cleavage at amino acid position 863 fails to remove a C-terminal fragment of 8 kDa and target protein to the Nuclear Pore Complex. APD is an autoproteolytic S59 endopeptidase protein domain. Source data are provided as a Source Data file.

**Supplementary Table 1.** (a) Differential GLM (family=quasibinomial) analysis results for the percentage of active SH fractions across LUAD conditions accounting for confounders such as age, gender and smoking status of patients. P-values are two-sided, with no adjustments made for multiple comparisons. Optional results from non-adjusted and cell-count adjusted differential analysis in (b) and (c), respectively.

| (a) P-value from GLM (family=quasibinomial) analysis accounting for age, gender and smoking status. Age represents subject's age at diagnosis. P values are two-sided, with no adjustments made for multiple comparisons. The effect size or standardizing coefficients in the brackets of relevant hits. |                                                  |                                                |                                                    | (b) P-value from GLM (family=quasibinomial) analysis and non-adjusted for confounders. P values are two-sided, with no adjustments made for multiple comparisons. The effect size or standardizing coefficients in the brackets of relevant hits. |                                                  |                                                |                                                    | (c) P-value from GLM (family=quasibinomial) accounting for age, gender, smoking, and % of tumor cells per tissue cut. P values are two-sided, with no adjustments made for multiple comparisons. Novel hits in bold. |                                                  |                                                |                                                    |
|-----------------------------------------------------------------------------------------------------------------------------------------------------------------------------------------------------------------------------------------------------------------------------------------------------------|--------------------------------------------------|------------------------------------------------|----------------------------------------------------|---------------------------------------------------------------------------------------------------------------------------------------------------------------------------------------------------------------------------------------------------|--------------------------------------------------|------------------------------------------------|----------------------------------------------------|----------------------------------------------------------------------------------------------------------------------------------------------------------------------------------------------------------------------|--------------------------------------------------|------------------------------------------------|----------------------------------------------------|
| Tumor short survival vs. tumor long survival                                                                                                                                                                                                                                                              | Short survival tumor vs. short survival nontumor | Long survival tumor vs. long survival nontumor | Nontumor short survival vs. nontumor long survival | Tumor short survival vs. tumor long survival                                                                                                                                                                                                      | Short survival tumor vs. short survival nontumor | Long survival tumor vs. long survival nontumor | Nontumor short survival vs. nontumor long survival | Tumor short survival vs. tumor long survival                                                                                                                                                                         | Short survival tumor vs. short survival nontumor | Long survival tumor vs. long survival nontumor | Nontumor short survival vs. nontumor long survival |
| ABHD10: 0.2531                                                                                                                                                                                                                                                                                            | ABHD10: 0.0931                                   | ABHD10: 0.1122                                 | ABHD10: 0.047 (-1.40)                              | ABHD10: 0.3941                                                                                                                                                                                                                                    | ABHD10: 0.1212                                   | ABHD10: 0.1574                                 | ABHD10: 0.05 (-1.39)                               | ABHD10: 0.3549                                                                                                                                                                                                       | ABHD10: 0.1467                                   | ABHD10: 0.4813                                 | ABHD10: 0.05 (-1.4)                                |
| ABHD12: 0.1008                                                                                                                                                                                                                                                                                            | ABHD12: 0.1146                                   | ABHD12: 0.032 (-1.80)                          | ABHD12: 0.025 (-1.43)                              | ABHD12: 0.0711                                                                                                                                                                                                                                    | ABHD12: 0.0974                                   | ABHD12: 0.027 (-1.67)                          | ABHD12: 0.03 (-1.30)                               | ABHD12: 0.1521                                                                                                                                                                                                       | ABHD12: 0.0878                                   | ABHD12: 0.2365                                 | ABHD12: 0.027 (-1.42)                              |
| ABHD16A: 0.1333                                                                                                                                                                                                                                                                                           | ABHD16A: 0.1831                                  | ABHD16A: 0.0667                                | ABHD16A: 0.0940                                    | ABHD16A: 0.2112                                                                                                                                                                                                                                   | ABHD16A: 0.1756                                  | ABHD16A: 0.0726                                | ABHD16A: 0.0589                                    | ABHD16A: 0.0739                                                                                                                                                                                                      | ABHD16A: 0.9610                                  | ABHD16A: 0.04 (2.54)                           | ABHD16A: 0.1046                                    |
| C1S: 0.2903                                                                                                                                                                                                                                                                                               | C1S: 0.5609                                      | C1S: 0.0607                                    | C1S: 0.031 (1.57)                                  | C1S: 0.7278                                                                                                                                                                                                                                       | C1S: 0.6926                                      | C1S: 0.1317                                    | C1S: 0.1421                                        | C1S: 0.2043                                                                                                                                                                                                          | C1S: 0.9081                                      | C1S: 0.4635                                    | C1S: 0.032 (1.60)                                  |
| CD163: 0.6948                                                                                                                                                                                                                                                                                             | CD163: 0.012 (1.187)                             | CD163: 0.0574                                  | CD163: 0.2463                                      | CD163: 0.8433                                                                                                                                                                                                                                     | CD163: 0.01 (1.18)                               | CD163: 0.06                                    | CD163: 0.2766                                      | CD163: 0.3349                                                                                                                                                                                                        | CD163: 0.0045 (1.63)                             | CD163: 0.027 (1.44)                            | CD163: 0.2548                                      |
| CD5L: 0.4470                                                                                                                                                                                                                                                                                              | CD5L: 0.038 (1.26)                               | CD5L: 0.3096                                   | CD5L: 0.6878                                       | CD5L: 0.4713                                                                                                                                                                                                                                      | CD5L: 0.049 (1.16)                               | CD5L: 0.3316                                   | CD5L: 0.6916                                       | CD5L: 0.2536                                                                                                                                                                                                         | CD5L: 0.3378                                     | CD5L: 0.8206                                   | CD5L: 0.6773                                       |
| CES1: 0.8366                                                                                                                                                                                                                                                                                              | CES1: 0.035 (0.77)                               | CES1: 0.4993                                   | CES1: 0.1016                                       | CES1: 0.8404                                                                                                                                                                                                                                      | CES1: 0.031 (0.76)                               | CES1: 0.4885                                   | CES1: 0.0910                                       | CES1: 0.7282                                                                                                                                                                                                         | CES1: 0.0798                                     | CES1: 0.4842                                   | CES1: 0.1121                                       |
| CFB: 0.4081                                                                                                                                                                                                                                                                                               | CFB: 0.5826                                      | CFB: 0.01 (1.18)                               | CFB: 0.1559                                        | CFB: 0.4685                                                                                                                                                                                                                                       | CFB: 0.5786                                      | CFB: 0.009 (1.14)                              | CFB: 0.1196                                        | CFB: 0.2839                                                                                                                                                                                                          | CFB: 0.3599                                      | CFB: 0.0248 (1.58)                             | CFB: 0.1594                                        |
| CLPP: 0.1691                                                                                                                                                                                                                                                                                              | CLPP: 0.6697                                     | CLPP: 0.047 (-2.4)                             | CLPP: 0.0791                                       | CLPP: 0.2597                                                                                                                                                                                                                                      | CLPP: 0.6632                                     | CLPP: 0.049 (-2.11)                            | CLPP: 0.0275 (0.29)                                | CLPP: 0.1534                                                                                                                                                                                                         | CLPP: 0.9226                                     | CLPP: 0.0718                                   | CLPP: 0.0859                                       |
| DPP4: 0.1860                                                                                                                                                                                                                                                                                              | DPP4: 0.5264                                     | DPP4: 0.027 (1.40)                             | DPP4: 0.7125                                       | DPP4: 0.1928                                                                                                                                                                                                                                      | DPP4: 0.5065                                     | DPP4: 0.02 (1.38)                              | DPP4: 0.6230                                       | DPP4: 0.0835                                                                                                                                                                                                         | DPP4: 0.1570                                     | DPP4: 0.0176 (2.60)                            | DPP4: 0.7054                                       |
| ELANE: 0.4462                                                                                                                                                                                                                                                                                             | ELANE: 0.0129 (1.06)                             | ELANE: 0.0751                                  | ELANE: 0.9158                                      | ELANE: 0.2915                                                                                                                                                                                                                                     | ELANE: 0.024 (1.02)                              | ELANE: 0.1260                                  | ELANE: 0.7693                                      | ELANE: 0.3074                                                                                                                                                                                                        | ELANE: 0.2183                                    | ELANE: 0.6836                                  | ELANE: 0.9317                                      |
| F9: 0.5067                                                                                                                                                                                                                                                                                                | F9: 0.8896                                       | F9: 0.023 (1.54)                               | F9: 0.1016                                         | F9: 0.4325                                                                                                                                                                                                                                        | F9: 0.8939                                       | F9: 0.016 (1.52)                               | F9: 0.0858                                         | F9: 0.3268                                                                                                                                                                                                           | F9: 0.4487                                       | F9: 0.0286 (2.25)                              | F9: 0.1043                                         |
| FAAH2: 0.1232                                                                                                                                                                                                                                                                                             | FAAH2: 0.0758                                    | FAAH2: 0.2370                                  | FAAH2: 0.1607                                      | FAAH2: 0.0939                                                                                                                                                                                                                                     | FAAH2: 0.0645                                    | FAAH2: 0.2336                                  | FAAH2: 0.1648                                      | FAAH2: 0.3564                                                                                                                                                                                                        | FAAH2: 0.043 (1.70)                              | FAAH2: 0.8710                                  | FAAH2: 0.1742                                      |
| FASN: 0.5638                                                                                                                                                                                                                                                                                              | FASN: 0.3445                                     | FASN: 0.018 (1.03)                             | FASN: 0.3077                                       | FASN: 0.7152                                                                                                                                                                                                                                      | FASN: 0.3486                                     | FASN: 0.021 (0.99)                             | FASN: 0.2543                                       | FASN: 0.3083                                                                                                                                                                                                         | FASN: 0.1453                                     | FASN: 0.0179 (1.62)                            | FASN: 0.3038                                       |
| HP: 0.3982                                                                                                                                                                                                                                                                                                | HP: 0.0214 (0.71)                                | HP: 0.0002 (0.71)                              | HP: 0.2098                                         | HP: 0.5433                                                                                                                                                                                                                                        | HP: 0.02 (0.77)                                  | HP: 0.0002 (1.45)                              | HP: 0.1694                                         | HP: 0.1600                                                                                                                                                                                                           | HP: 0.006 (1.07)                                 | HP: 0.0002 (2.05)                              | HP: 0.1996                                         |
| IAH1: 0.0179 (1.79)                                                                                                                                                                                                                                                                                       | IAH1: 0.3299                                     | IAH1: 0.016 (1.82)                             | IAH1: 0.3132                                       | IAH1: 0.0134 (1.77)                                                                                                                                                                                                                               | IAH1: 0.3337                                     | IAH1: 0.014 (-1.76)                            | IAH1: 0.3417                                       | IAH1: 0.0076 (2.15)                                                                                                                                                                                                  | IAH1: 0.7547                                     | IAH1: 0.008 (-2.8)                             | IAH1: 0.3018                                       |
| LTF: 0.5693                                                                                                                                                                                                                                                                                               | LTF: 0.3501                                      | LTF: 0.006 (f2: 2.03)                          | LTF: 0.1251                                        | LTF: 0.6318                                                                                                                                                                                                                                       | LTF: 0.3745                                      | LTF: 0.008 (1.23)                              | LTF: 0.1241                                        | LTF: 0.2695                                                                                                                                                                                                          | LTF: 0.1231                                      | LTF: 0.0054 (1.97)                             | LTF: 0.1200                                        |
| LYPLA1: 0.3636                                                                                                                                                                                                                                                                                            | LYPLA1: 0.9632                                   | LYPLA1: 0.2533                                 | LYPLA1: 0.7811                                     | LYPLA1: 0.4354                                                                                                                                                                                                                                    | LYPLA1: 0.9575                                   | LYPLA1: 0.2567                                 | LYPLA1: 0.6795                                     | LYPLA1: 0.0885                                                                                                                                                                                                       | LYPLA1: 0.1726                                   | LYPLA1: 0.021 (-1.85)                          | LYPLA1: 0.7455                                     |
| LYPLA2: 0.044 (1.03)                                                                                                                                                                                                                                                                                      | LYPLA2: 0.021 (1.35)                             | LYPLA2: 0.1416                                 | LYPLA2: 0.0785                                     | LYPLA2: 0.1571                                                                                                                                                                                                                                    | LYPLA2: 0.0808                                   | LYPLA2: 0.2258                                 | LYPLA2: 0.1185                                     | LYPLA2: 0.0762                                                                                                                                                                                                       | LYPLA2: 0.0768                                   | LYPLA2: 0.3819                                 | LYPLA2: 0.0884                                     |
| LYPLAL1: 0.0245 (0.71)                                                                                                                                                                                                                                                                                    | LYPLAL1: 0.2204                                  | LYPLAL1: 0.8079                                | LYPLAL1: 0.4048                                    | LYPLAL1: 0.053 (0.68)                                                                                                                                                                                                                             | LYPLAL1: 0.2954                                  | LYPLAL1: 0.8325                                | LYPLAL1: 0.4846                                    | LYPLAL1: 0.1108                                                                                                                                                                                                      | LYPLAL1: 0.1218                                  | LYPLAL1: 0.4998                                | LYPLAL1: 0.3976                                    |
| MST1: 0.0044 (-0.92)                                                                                                                                                                                                                                                                                      | MST1: 0.3409                                     | MST1: 0.005 (0.88)                             | MST1: 0.2846                                       | MST1: 0.018 (-0.92)                                                                                                                                                                                                                               | MST1: 0.5197                                     | MST1: 0.045 (0.76)                             | MST1: 0.3018                                       | MST1: 0.0975                                                                                                                                                                                                         | MST1: 0.3451                                     | MST1: 0.5433                                   | MST1: 0.2082                                       |
| PAFAH1B2: 0.9347                                                                                                                                                                                                                                                                                          | PAFAH1B2: 0.3268                                 | PAFAH1B2: 0.9505                               | PAFAH1B2: 0.3288                                   | PAFAH1B2: 0.9499                                                                                                                                                                                                                                  | PAFAH1B2: 0.2911                                 | PAFAH1B2: 0.9678                               | PAFAH1B2: 0.2814                                   | PAFAH1B2: 0.4089                                                                                                                                                                                                     | PAFAH1B2: 0.03 (-2.53)                           | PAFAH1B2: 0.037 (-2.56)                        | PAFAH1B2: 0.2645                                   |
| PLD3: 0.3841                                                                                                                                                                                                                                                                                              | PLD3: 0.05                                       | PLD3: 0.0027 (1.14)                            | PLD3: 0.7356                                       | PLD3: 0.5254                                                                                                                                                                                                                                      | PLD3: 0.0606                                     | PLD3: 0.006 (1.03)                             | PLD3: 0.7121                                       | PLD3: 0.1606                                                                                                                                                                                                         | PLD3: 0.017 (1.11)                               | PLD3: 0.0036 (1.79)                            | PLD3: 0.7261                                       |
| PRCP: 0.3262                                                                                                                                                                                                                                                                                              | PRCP: 0.0179 (0.97)                              | PRCP: 0.1207                                   | PRCP: 0.8875                                       | PRCP: 0.2203                                                                                                                                                                                                                                      | PRCP: 0.029 (0.59)                               | PRCP: 0.1491                                   | PRCP: 0.6472                                       | PRCP: 0.6613                                                                                                                                                                                                         | PRCP: 0.0196 (1.45)                              | PRCP: 0.0809                                   | PRCP: 0.8682                                       |
| PREP: 0.8536                                                                                                                                                                                                                                                                                              | PREP: 0.2229                                     | PREP: 0.018 (1.04)                             | PREP: 0.2911                                       | PREP: 0.8626                                                                                                                                                                                                                                      | PREP: 0.1848                                     | PREP: 0.0096 (1.04)                            | PREP: 0.2277                                       | PREP: 0.9956                                                                                                                                                                                                         | PREP: 0.5463                                     | PREP: 0.2819                                   | PREP: 0.2996                                       |
| SCPEP1: 0.004 (-0.92)                                                                                                                                                                                                                                                                                     | SCPEP1: 0.3409                                   | SCPEP1: 0.005 (0.88)                           | SCPEP1: 0.2846                                     | SCPEP1: 0.018 (-0.92)                                                                                                                                                                                                                             | SCPEP1: 0.5197                                   | SCPEP1: 0.045 (0.76)                           | SCPEP1: 0.3018                                     | SCPEP1: 0.0975                                                                                                                                                                                                       | SCPEP1: 0.3451                                   | SCPEP1: 0.5433                                 | SCPEP1: 0.2082                                     |
| SIAE: 0.1796                                                                                                                                                                                                                                                                                              | SIAE: 0.0261 (0.70)                              | SIAE: 0.0000 (1.48)                            | SIAE: 0.2950                                       | SIAE: 0.1004                                                                                                                                                                                                                                      | SIAE: 0.0305 (0.67)                              | SIAE: 0.0000 (1.43)                            | SIAE: 0.4392                                       | SIAE: 0.0435 (-0.66)                                                                                                                                                                                                 | SIAE: 0.0033 (1.22)                              | SIAE: 0.0000 (2.26)                            | SIAE: 0.2714                                       |
| TPP1: 0.3718                                                                                                                                                                                                                                                                                              | TPP1: 0.039 (1.20)                               | TPP1: 0.3795                                   | TPP1: 0.6286                                       | TPP1: 0.4383                                                                                                                                                                                                                                      | TPP1: 0.0342 (1.16)                              | TPP1: 0.3929                                   | TPP1: 0.5051                                       | TPP1: 0.7874                                                                                                                                                                                                         | TPP1: 0.0247 (1.63)                              | TPP1: 0.1835                                   | TPP1: 0.6393                                       |
| NUP98: 0.6703                                                                                                                                                                                                                                                                                             | NUP98: 0.7988                                    | NUP98: 0.9978                                  | NUP98: 0.8635                                      | NUP98: 0.9778                                                                                                                                                                                                                                     | NUP98: 0.7467                                    | NUP98: 0.9870                                  | NUP98: 0.7554                                      | NUP98: 0.1030                                                                                                                                                                                                        | NUP98: 0.0153 (2.97)                             | NUP98: 0.0185 (1.19)                           | NUP98: 0.6055                                      |

## Supplementary Notes

**Supplementary Note 1:** Original images for Western blots and gels Figure 4a and Figure 6c, respectively.

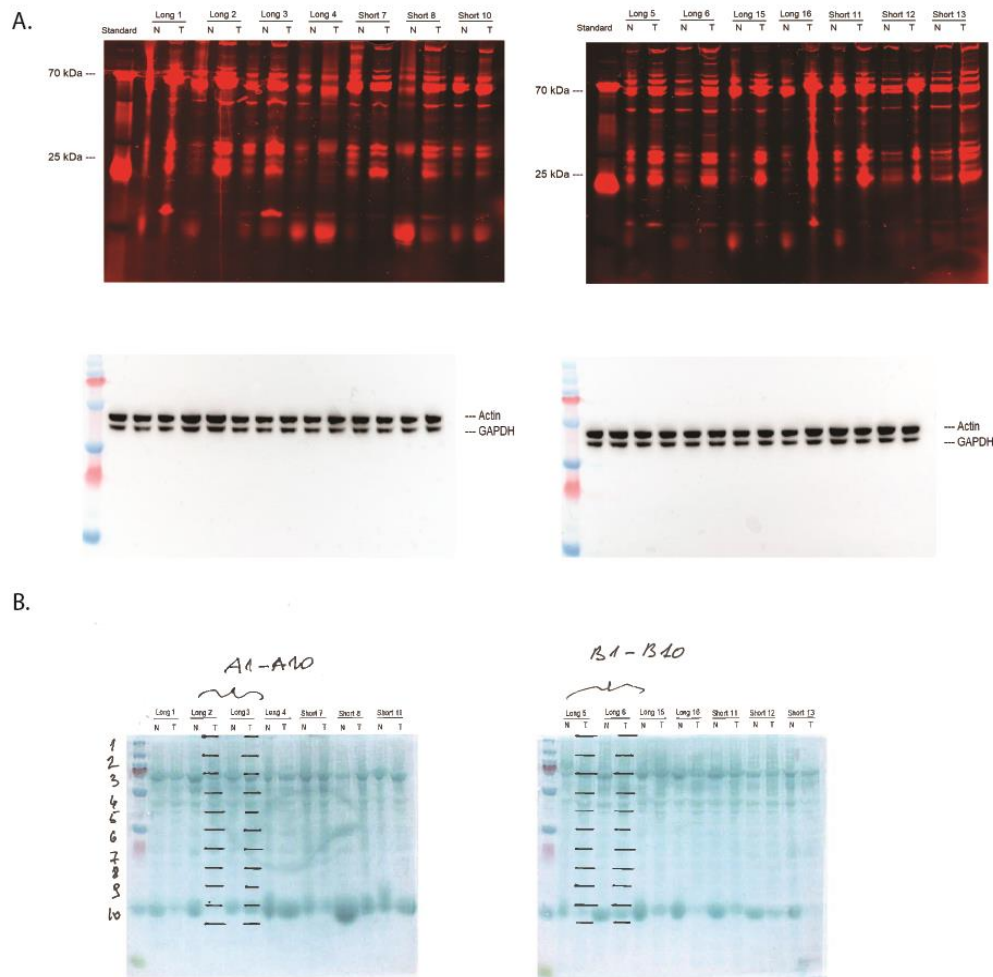

**Figure 4a.** (A). Upper: Fluorescent gels – original images generated after sample separation by gel electrophoresis. Protein extracts tagged with TAMRA fluorescence reporter. Bottom: Western blot with actin and GAPDH loading control. ImageJ software was used to quantify the bands. Results reported in Fig. 4D-E. (B). Coomassie brilliant blue staining of gels. Representative samples selected per gel and the respective protein lanes cut into 10 slices (gel on the left: A1-A10; gel on the right: B1-B10) following a standard in-gel protocol for identifications of proteins per bands appearing on the gel.

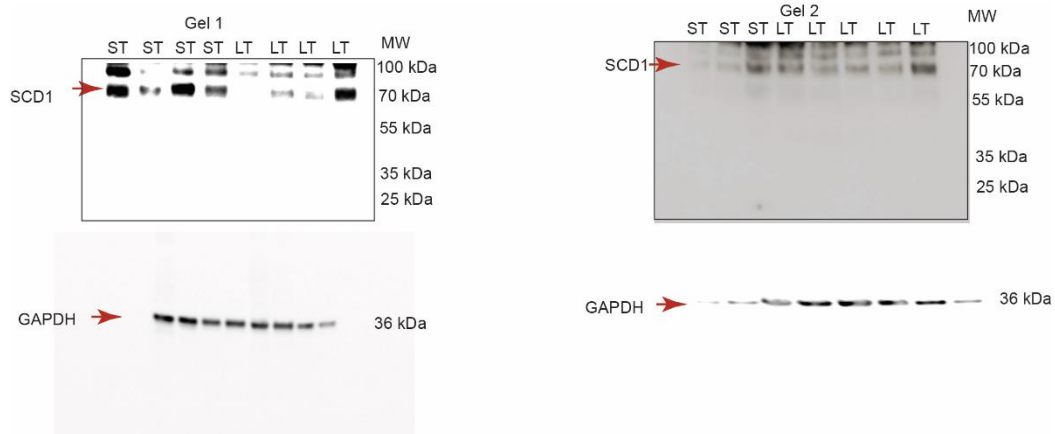

**Figure 6b.** Original images for SCD1 western blot. Upper: Membranes of respective gel1 (left) and gel 2 (right) – original images generated after sample separation by gel electrophoresis. Protein extracts of tumor tissues from Long survival patients (LT) and from Short-survival patients (ST). Bottom: Western blot with GAPDH loading control for each respective sample. ImageJ software was used to quantify the bands. Results reported in Fig. 6.c. SCD1 molecular weight (MW) predicted at 42 kDa, and detected at 70 kDa.

**Supplementary Note 2:** Overview of the characteristics of each proteomics method for studying enzyme families, the new generation of dd-ABPP and the standard ABPP approach.

| Method                                                                                                                   | Description of procedure                                                                                                                                                                                                                                                                                                                                                                            | Quantitative data reports                                                                                                                                                                                                    | Method advantages                                                                                                                                                                                                                                                                                                                     |
|--------------------------------------------------------------------------------------------------------------------------|-----------------------------------------------------------------------------------------------------------------------------------------------------------------------------------------------------------------------------------------------------------------------------------------------------------------------------------------------------------------------------------------------------|------------------------------------------------------------------------------------------------------------------------------------------------------------------------------------------------------------------------------|---------------------------------------------------------------------------------------------------------------------------------------------------------------------------------------------------------------------------------------------------------------------------------------------------------------------------------------|
| <p><b>dd-ABPP<br/>SWATH/DIA-MS</b></p> 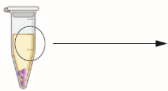 | <p><b>Data acquisition</b></p> <ul style="list-style-type: none"> <li>DIA-MS with spectral library</li> </ul> <p><b>Protein digestion</b></p> <ul style="list-style-type: none"> <li>In-solution digestion</li> </ul> <p><b>Analysed samples</b></p> <ul style="list-style-type: none"> <li>Total tissue extract</li> <li>Depleted tissue extract for desactivated enzymes</li> </ul>               | <ul style="list-style-type: none"> <li>Fraction of active enzymes</li> <li>Abundance of enzymes</li> <li>Abundance of proteins (contextual proteome)</li> <li>Protein interactors co-depleted with active enzymes</li> </ul> | <ul style="list-style-type: none"> <li>Streamlined <i>in-solution</i> protein digestion</li> <li>No streptavidin contamination</li> <li>No time-consuming beads washing</li> <li>Total and active form of enzymes of interest available</li> <li>Contextual sample proteome and protein interactors with enzymes available</li> </ul> |
| <p><b>ABPP-MS</b></p>                   | <p><b>Data acquisition</b></p> <ul style="list-style-type: none"> <li>DDA-MS</li> </ul> <p><b>Protein digestion</b></p> <ul style="list-style-type: none"> <li>On-bead digestion</li> </ul> <p><b>Analysed samples</b></p> <ul style="list-style-type: none"> <li>Streptavidin beads pull-down enriched for desactivated enzymes</li> <li>Streptavidin beads pull-down with contaminants</li> </ul> | <ul style="list-style-type: none"> <li>Active enzymes</li> <li>Accesory non-enzyme proteins (potential interactors)</li> </ul>                                                                                               | <ul style="list-style-type: none"> <li>Detection of probe-inactivated enzymes that allows specific discovery of new members</li> </ul>                                                                                                                                                                                                |

**Supplementary Note 3:** Relative comparison of selected FA in patient tumors obtained through a full scan untargeted LC-HRMS profiling on Agilent 6550 IonFunnel QTOF operating in negative ESI mode. FA annotation was done by the accurate mass and retention time (AMRT) matching against in-house database of pure lipid standards analyzed under the same analytical condition.

**Table S. Note3:** List of commercial lipid standards obtained from Sigma-Aldrich (Darmstadt, Germany) analysed as mixture of saturated, monounsaturated and unsaturated FA under the same analytical condition as tumour samples (UHPLC-HRMS Agilent QTOF system).

| <b>Saturated Fatty acids</b>       |                  |             |                   |                          |          |
|------------------------------------|------------------|-------------|-------------------|--------------------------|----------|
| Synonym                            | Name             | Carbon/Ins  | Sigma-Aldrich Ref | [M-H] <sup>-</sup> (m/z) | RT (min) |
| Hexanoic                           | Caproic          | C6:0        | 21529-5ML         | <b>115.0765</b>          | 0.51     |
| Octanoic                           | Caprylic         | C8:0        | C2875             | <b>143.1078</b>          | 0.68     |
| Decanoic                           | Capric           | C10:0       | C1875             | <b>171.1391</b>          | 1.03     |
| Dodecanoic                         | Lauric           | C12:0       | W261408           | <b>199.1704</b>          | 1.67     |
| Tetradecanoic                      | Myristic         | C14:0       | 70082             | <b>227.2017</b>          | 2.65     |
| Hexadecanoic                       | Palmitic         | C16:0       | P0500             | <b>255.2330</b>          | 3.37     |
| Heptadecanoic                      | Margaric         | C17:0       | H3500             | <b>269.2486</b>          | 3.71     |
| Octadenoic                         | Stearic          | C18:0       | S4751             | <b>283.2643</b>          | 4.08     |
| Eicosanoic                         | Arachidic        | C20:0       | A3631             | <b>311.2956</b>          | 4.9      |
| Docosanoic                         | Behenic          | C22:0       | 216941            | <b>339.3269</b>          | 5.8      |
| Tetracosanoic                      | Lignoceric       | C24:0       | L6641             | <b>367.3582</b>          | 6.8      |
| Hexacosanoic acid                  | Cerotic          | C26:0       | H0388             | <b>395.3895</b>          | 7.8      |
| <b>Monoenoic fatty acids</b>       |                  |             |                   |                          |          |
| Synonym                            | Name             | Carbon/Ins  | Sigma-Aldrich Ref | M-H-                     | RT (min) |
| cis-9-hexadecenoic                 | Palmitoleic      | C16:1 (n-7) | P9417             | <b>253.2173</b>          | 2.87     |
| cis-6-octadecenoic                 | Petroselinic     | C18:1 (n-6) | P8750             | <b>281.2486</b>          | 3.58     |
| cis-9-octadecenoic                 | Oleic            | C18:1 (n-9) | O1008             | <b>281.2486</b>          | 3.51     |
| trans-9-octadecenoic               | Elaidic          | C18:1 (z-9) | E4637             | <b>281.2486</b>          | 3.61     |
| cis-11-octadecenoic                | cis-vaccenic     | C18:1 (n-7) | V0384             | <b>281.2486</b>          | 3.49     |
| cis-13-docosenoic                  | Erucic           | C22:1 (n-9) | E3385             | <b>337.3112</b>          | 4.99     |
| cis-15-tetracosenoic               | Nervonic         | C24:1 (n-9) | N1514             | <b>365.3425</b>          | 5.89     |
| <b>Polyunsaturated fatty acids</b> |                  |             |                   |                          |          |
| Synonym                            | Name             | Carbon/Ins  | Sigma-Aldrich Ref | M-H-                     | RT (min) |
| 9,12-octadecadienoic               | Linoleic         | 18:2 (n-6)  | L1012             | <b>279.2330</b>          | 3.08     |
| 6,9,12-octadecatrienoic            | γ-linolenic      | 18:3 (n-6)  | 62174-100MG-F     | <b>277.2173</b>          | 2.67     |
| 9,12,15-octadecatrienoic           | α-linolenic      | 18:3 (n-3)  | L2376             | <b>277.2173</b>          | 2.59     |
| 5,8,11,14-eicosatetraenoic         | Arachidonic      | 20:4 (n-6)  | 23401-50MG        | <b>303.2330</b>          | 3.01     |
| 5,8,11,14,17-eicosapentaenoic      | Eicosapentaenoic | 20:5 (n-3)  | E2011             | <b>301.2173</b>          | 2.49     |
| 4,7,10,13,16,19-docosahexaenoic    | Docosahexaenoic  | 22:6 (n-3)  | D2534             | <b>327.2330</b>          | 2.87     |

**Figure S. Note3.1:** Overlay of Total ion current (TIC) chromatograms of the 10 tumor extracts measured on LC-HRMS Agilent 6550 IonFunnel QTOF system.

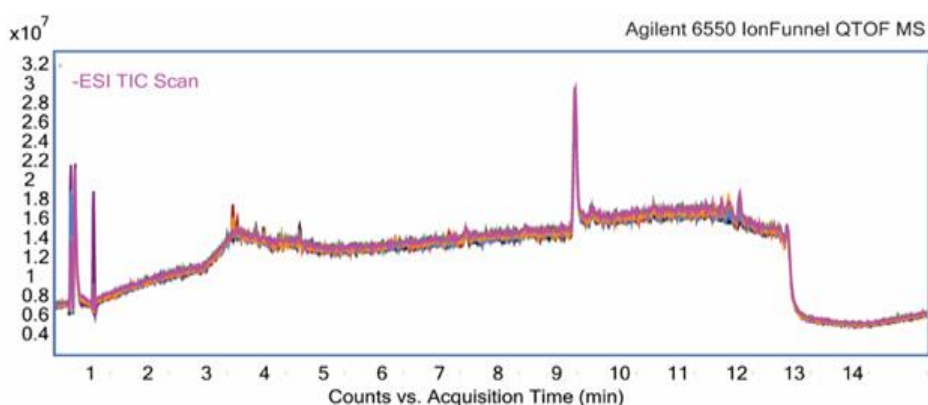

Figure S. Note3.2: Extracted ion chromatograms (EIC) of selected FAs annotated in the tumor extracts, with EICs of pure standards and blank (or neat solvent) analyzed under the same analytical conditions. The following chromatograms illustrate the saturated, monounsaturated (MUFA), and polyunsaturated (PUFA) FAs detected in the participants' tissue extracts based on AMRT matching to pure standards using MassHunter software (v:10.0; Agilent Technologies).

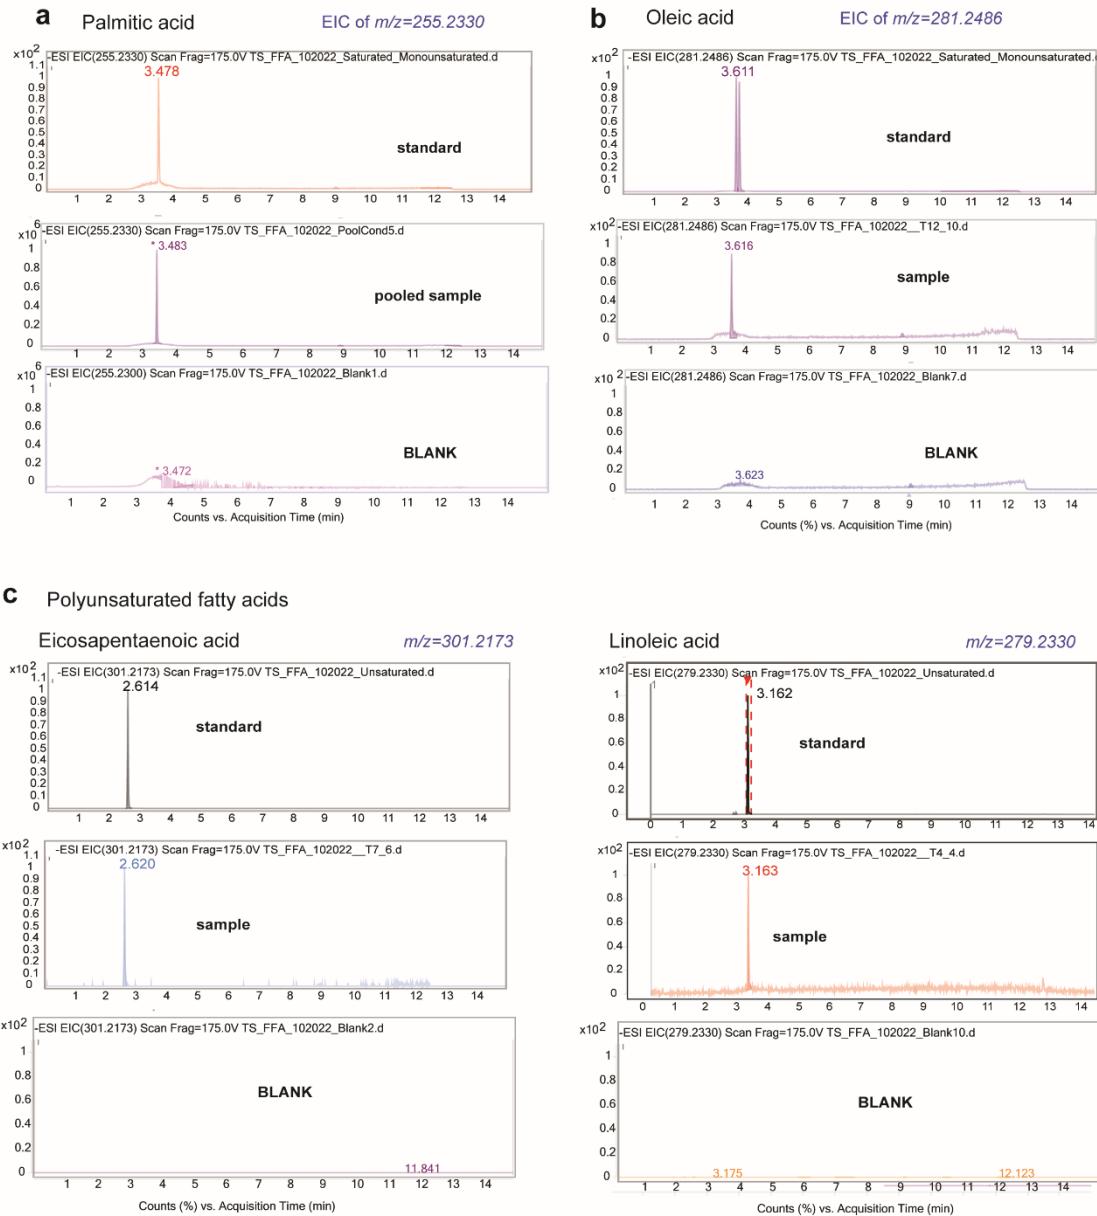

**Supplementary Note 4:** Absolute quantification of four FA of interest using UHPLC-HRMS Orbitrap™ IQ-X™ Tribid™ mass spectrometer in ESI negative mode. For the absolute quantification of selected FA, external calibration curves based on the acquisition of pure authentic standards (AS) solutions against the isotopically labeled internal standard of known concentration were used.

Table S.Note4: List of commercial isotopically labelled internal standards obtained from Larodan AG (Solna, Sweden) used for absolute quantification of four FA of interest.

| Reference Larodan AG (Solna, Sweden) | Molecular formula | Molecular weight | RT   |
|--------------------------------------|-------------------|------------------|------|
| Hexadecenoicacid-d3                  | C16H29D3O2        | 259.44           | 3.46 |
| Palmitoleicacid-d13                  | C16H17D13O2       | 267.49           | 2.9  |
| Oleicacid-d9                         | C18H25D9O2        | 291.52           | 3.58 |
| Eicosapentaenoicacid-d5              | C20H25D5O2        | 307.48           | 2.49 |

Figure S. Note4.1 TIC sample chromatograms on LC-HRMS using Orbitrap IQX Tribid MS - in "superimposed mode" show that fresh frozen tissue (middle panel, Tu6 was available as fresh frozen) has the same TIC profiles as OCT cleaned tissue.

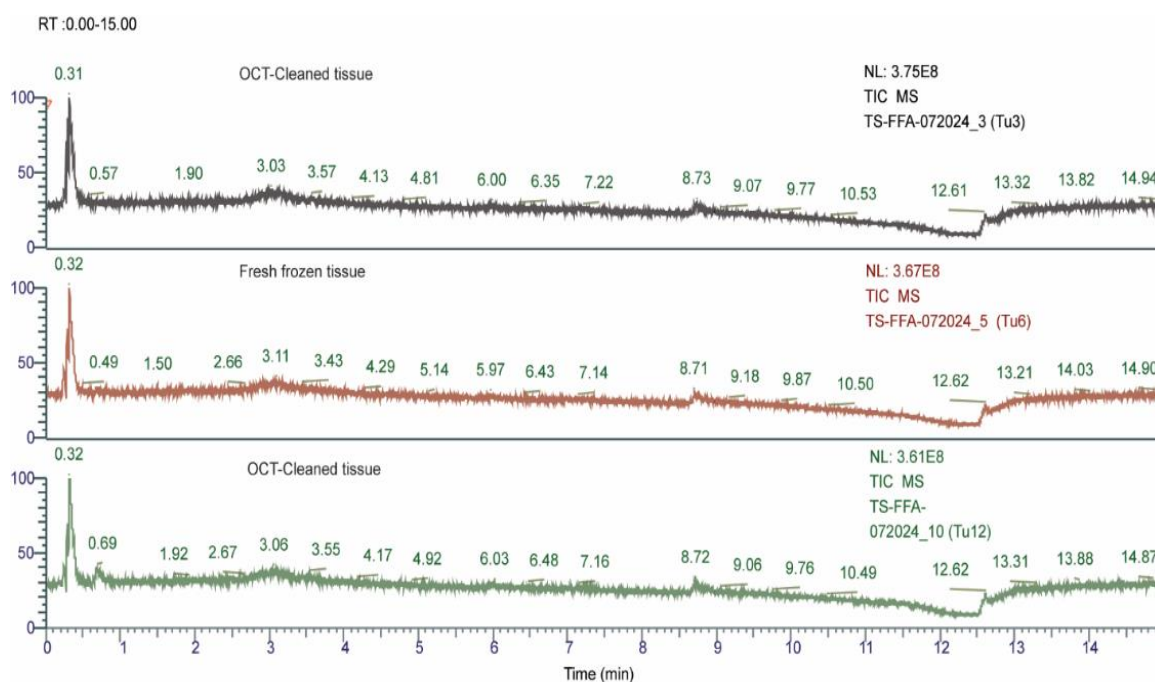

Figure S. Note4.2 Extracted ion chromatograms (EICs) for the measured fatty acids show the peak shape and RT in the: 1.) one tissue lysate (sample extract), the extracted blank or calibrator 0 (processed in the same way as samples) and 3) blank or neat solvent. EIC of their deuterated internal standards (IS) is on the first upper panel. Quantitative accuracy is ensured by the linearity of calibration curve, following the manual peak integration and background subtraction. The linearity of the external calibration curves was evaluated for each lipid using a 9-point range (Cal0-Cal9). Despite the peak shape, when integrated manually respective peak areas nicely align and show linear MS signal response. In addition, the internal standard (IS) behaves in the same way in the same analytical conditions which allowed for the matrix effect correction for improved quantification accuracy. Plots the EICs reported by FreeStyle™ Thermo Fisher Scientific (v. 1.8.65.0) software.

**a Oleic acid**

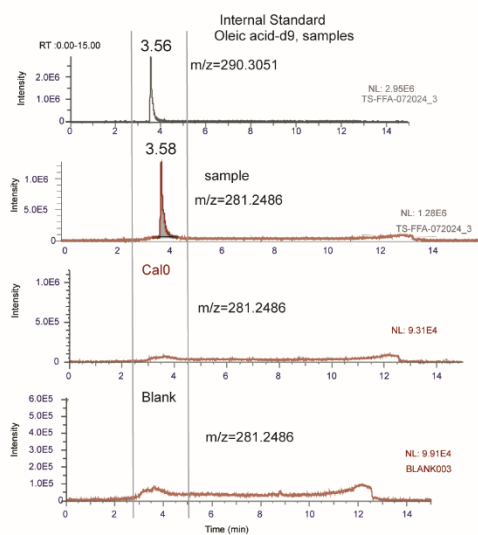

**b Hexadecenoic (Palmitic) acid**

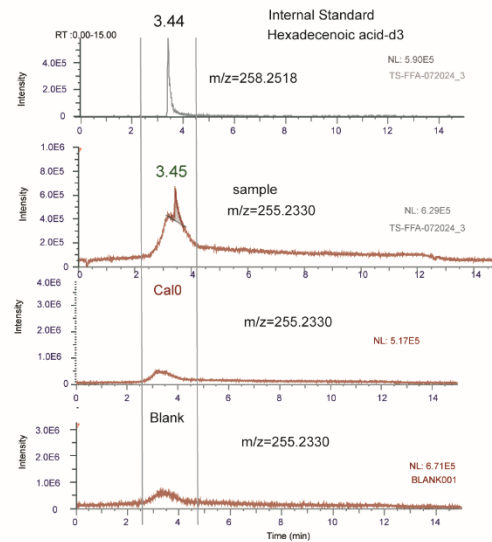

**c Eicosapentaenoic acid**

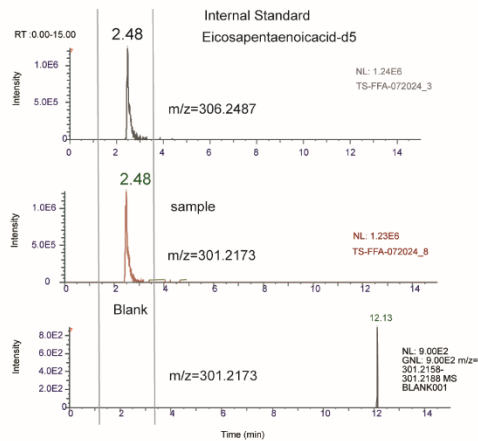

**d Palmitoleic acid**

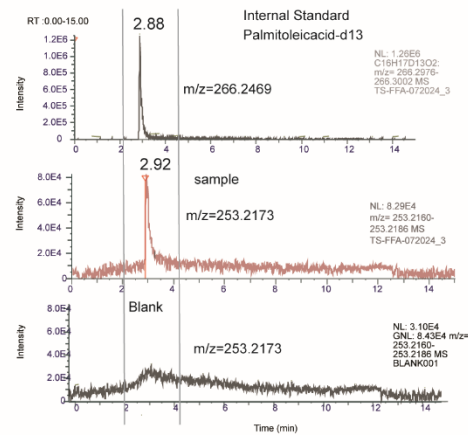

**Supplementary Note 5.** Minimal Reporting Checklist (<https://lipidomicstandards.org/>) for lipid measurements presented in the Figure 6 in two independent LC-MS platforms: A) relative quantification on Agilent QTOF system and B) absolute quantification on Orbitrap IQX Tribrid MS.

# Contents of Report

 Created by <https://lipidomicstandards.org>, version v2.4.0

|                                                                                  |          |
|----------------------------------------------------------------------------------|----------|
| <b>Separation Workflow</b>                                                       | <b>1</b> |
| Overall study design . . . . .                                                   | 1        |
| Lipid extraction . . . . .                                                       | 1        |
| Analytical platform . . . . .                                                    | 1        |
| Quality control . . . . .                                                        | 2        |
| Method qualification and validation . . . . .                                    | 2        |
| Reporting . . . . .                                                              | 2        |
| <b>Sample Descriptions</b>                                                       | <b>2</b> |
| FullIMSscan_FFA analysis / Human / Tissues (e.g., liver, heart, brain) . . . . . | 2        |
| <b>Lipid Class Descriptions</b>                                                  | <b>3</b> |
| 1) FA[M-H] <sup>-</sup> / Lipid identification . . . . .                         | 3        |
| 1) FA[M-H] <sup>-</sup> / Lipid quantification . . . . .                         | 4        |

## Separation Workflow

### Overall study design

|                        |                                                                                                                                                                          |                                         |                       |
|------------------------|--------------------------------------------------------------------------------------------------------------------------------------------------------------------------|-----------------------------------------|-----------------------|
| Title of the study     | Depletion-dependent Activity-Based Protein Profiling coupled to SWATH/DIA Mass Spectrometry detects serine hydrolase lipid remodeling in lung adenocarcinoma progression |                                         |                       |
| Document creation date | 02/10/2025                                                                                                                                                               | Corresponding Email                     | tatjana.sajic@chuv.ch |
| Principal investigator | Tatjana Sajic                                                                                                                                                            | Is the workflow targeted or untargeted? | Untargeted            |
| Institution            | Lausanne University Hospital                                                                                                                                             | Clinical                                | Yes                   |

### Lipid extraction

|                   |                   |                                                 |                           |
|-------------------|-------------------|-------------------------------------------------|---------------------------|
| Extraction method | 2-phase system    | Were internal standards added prior extraction? | No                        |
| pH adjustment     | PBS               | Special conditions                              | First PBS 1X; Isopropanol |
| 2-phase system    | 2-step extraction | Derivatization                                  | No                        |

### Analytical platform

|                                 |                   |                                               |                 |
|---------------------------------|-------------------|-----------------------------------------------|-----------------|
| Ionization additives            | Ammonium acetate  | Ion source                                    | ESI             |
| Number of separation dimensions | One dimension     | MS Level                                      | MS1             |
| Separation type 1               | LC                | Mass resolution for detected ion at MS1       | High resolution |
| Separation mode 1 (liquid)      | RP                | Resolution at m/z 200 at MS1                  | 20000           |
| Detector                        | Mass spectrometer | Mass accuracy in ppm at MS1                   | 5               |
| MS type                         | QTOF              | Recording mode of raw data at MS1             | Centroid mode   |
| MS vendor                       | Agilent           | Was/Were additional dimension/techniques used | No              |

## Quality control

|                |                                 |                   |                                |
|----------------|---------------------------------|-------------------|--------------------------------|
| Blanks         | Yes                             | Quality control   | Yes                            |
| Type of Blanks | Extraction blank, Solvent blank | Type of QC sample | Commercial sample, Sample pool |

## Method qualification and validation

|                                                      |     |                     |     |
|------------------------------------------------------|-----|---------------------|-----|
| Method validation                                    | Yes | Precision           | No  |
| Lipid recovery                                       | Yes | Accuracy            | Yes |
| Dynamic quantification range                         | Yes | Guidelines followed | EMA |
| Limit of quantitation (LOQ)/Limit of detection (LOD) | No  |                     |     |

## Reporting

|                                                 |                         |                     |                                         |
|-------------------------------------------------|-------------------------|---------------------|-----------------------------------------|
| Are reported raw data uploaded into repository? | Yes                     | Summary data        | Quantification and identification data  |
| Link to repository / ID to entry                | 10.5281/zenodo.14841692 | Raw data upload     | Yes                                     |
| Are metadata available?                         | Yes                     | Additional comments | Relative comparison of peak areas of FA |

## Sample Descriptions

### FullMSscan\_FFA analysis / Human / Tissues (e.g., liver, heart, brain)

|                                      |           |                                      |                                                           |
|--------------------------------------|-----------|--------------------------------------|-----------------------------------------------------------|
| Perfusion                            | No        | Additives                            | None                                                      |
| Storage and collection conditions    | Available | Were samples stored under inert gas? | No                                                        |
| Provided preanalytical information   | -         | Additional preservation methods      | No                                                        |
| Temperature handling original sample | -20 °C    | Biobank samples                      | Yes                                                       |
| Instant sample preparation           | Yes       | Sample homogenization                | Yes                                                       |
| Storage temperature                  | -80 °C    | Sample homogenization solvent        | First: Phosphate Buffer Saline (PBS); Second: Isopropanol |

# Lipid Class Descriptions

## 1) FA[M-H]- / Lipid identification

|                                                 |                         |                                                        |                                                                                                                                                                           |
|-------------------------------------------------|-------------------------|--------------------------------------------------------|---------------------------------------------------------------------------------------------------------------------------------------------------------------------------|
| Lipid class                                     | FA                      | Limit of detection                                     | Signal threshold                                                                                                                                                          |
| MS Level for identification                     | MS1                     | RT verified by standard                                | Yes                                                                                                                                                                       |
| Identification level                            | sn Position             | Separation of isobaric/isomeric interference confirmed | Yes                                                                                                                                                                       |
| Polarity mode                                   | Negative                | Model for separation prediction                        | Yes                                                                                                                                                                       |
| Type of negative (precursor)ion                 | [M-H]-                  | Additional dimension/techniques                        | -                                                                                                                                                                         |
| Isotope correction at MS1                       | Type 2                  | Lipid Identification Software                          | Homemade                                                                                                                                                                  |
| MS1 verified by standard                        | Yes                     | Data manipulation                                      | -                                                                                                                                                                         |
| Background check at MS1                         | Yes                     | Nomenclature for intact lipid molecule                 | Yes                                                                                                                                                                       |
| Did you presume assumptions for identification? | No                      | Further identification remarks                         | Relative comparison of FA levels obtained through a full scan untargeted LC-HRMS profiling and in-house library matching based on accurate mass and retention time (AMRT) |
| Check on:                                       | In-source fragmentation |                                                        |                                                                                                                                                                           |

## 1) FA[M-H]- / Lipid quantification

|                            |     |                                |                                                                                                                                                                                                                             |
|----------------------------|-----|--------------------------------|-----------------------------------------------------------------------------------------------------------------------------------------------------------------------------------------------------------------------------|
| Quantitative               | No  | Batch correction               | No                                                                                                                                                                                                                          |
| Normalization to reference | Yes | Further quantification remarks | Targeted data mining and FA annotation in patient samples performed by matching the accurate mass and retention time (AMRT) of 25 pure authentic FA standards (Sigma-Aldrich) analyzed under the same analytical conditions |

# Contents of Report

 Created by <https://lipidomicstandards.org>, version v2.4.0

|                                                                              |          |
|------------------------------------------------------------------------------|----------|
| <b>Separation Workflow</b>                                                   | <b>1</b> |
| Overall study design . . . . .                                               | 1        |
| Lipid extraction . . . . .                                                   | 1        |
| Analytical platform . . . . .                                                | 1        |
| Quality control . . . . .                                                    | 2        |
| Method qualification and validation . . . . .                                | 2        |
| Reporting . . . . .                                                          | 2        |
| <b>Sample Descriptions</b>                                                   | <b>2</b> |
| TS-FFA-072024_number / Human / Tissues (e.g., liver, heart, brain) . . . . . | 2        |
| <b>Lipid Class Descriptions</b>                                              | <b>3</b> |
| 1) FA[M-H] <sup>-</sup> / Lipid identification . . . . .                     | 3        |
| 1) FA[M-H] <sup>-</sup> / Lipid quantification . . . . .                     | 3        |

## Separation Workflow

### Overall study design

|                        |                                                                                                                                                                          |                                         |                       |
|------------------------|--------------------------------------------------------------------------------------------------------------------------------------------------------------------------|-----------------------------------------|-----------------------|
| Title of the study     | Depletion-dependent Activity-Based Protein Profiling coupled to SWATH/DIA Mass Spectrometry detects serine hydrolase lipid remodeling in lung adenocarcinoma progression |                                         |                       |
| Document creation date | 02/10/2025                                                                                                                                                               | Corresponding Email                     | tatjana.sajic@chuv.ch |
| Principal investigator | Tatjana Sajic                                                                                                                                                            | Is the workflow targeted or untargeted? | Targeted              |
| Institution            | CHUV                                                                                                                                                                     | Clinical                                | Yes                   |

### Lipid extraction

|                   |                         |                                                 |                  |
|-------------------|-------------------------|-------------------------------------------------|------------------|
| Extraction method | 1-phase system          | Were internal standards added prior extraction? | Yes              |
| pH adjustment     | Phosphate Buffer Saline | Special conditions                              | intensive mixing |
| 1-phase system    | Isopropanol             | Derivatization                                  | No               |

### Analytical platform

|                                 |                                                              |                                               |                 |
|---------------------------------|--------------------------------------------------------------|-----------------------------------------------|-----------------|
| Ionization additives            | Ammonium acetate                                             | Ion source                                    | ESI             |
| Number of separation dimensions | One dimension                                                | MS Level                                      | MS1             |
| Separation type 1               | ultra-high performance liquid chromatography (UHPLC)         | Mass resolution for detected ion at MS1       | High resolution |
| Separation mode 1 (generic)     | Zorbax Eclipse Plus C18 (1.8 m, 100 mm × 2.1 mm I.D. column) | Resolution at m/z 200 at MS1                  | 60000           |
| Detector                        | Mass spectrometer                                            | Mass accuracy in ppm at MS1                   | 5               |
| MS type                         | Orbitrap                                                     | Recording mode of raw data at MS1             | Centroid mode   |
| MS vendor                       | Thermo                                                       | Was/Were additional dimension/techniques used | No              |

## Quality control

|                |                                                          |                   |                                                    |
|----------------|----------------------------------------------------------|-------------------|----------------------------------------------------|
| Blanks         | Yes                                                      | Quality control   | Yes                                                |
| Type of Blanks | Extraction blank, Solvent blank, Internal standard blank | Type of QC sample | Commercial sample, Sample pool, Reference material |

## Method qualification and validation

|                                                      |     |                     |     |
|------------------------------------------------------|-----|---------------------|-----|
| Method validation                                    | Yes | Precision           | Yes |
| Lipid recovery                                       | Yes | Accuracy            | Yes |
| Dynamic quantification range                         | Yes | Guidelines followed | EMA |
| Limit of quantitation (LOQ)/Limit of detection (LOD) | Yes |                     |     |

## Reporting

|                                                 |                         |                     |                                                                                                                  |
|-------------------------------------------------|-------------------------|---------------------|------------------------------------------------------------------------------------------------------------------|
| Are reported raw data uploaded into repository? | Yes                     | Summary data        | Quantification and identification data                                                                           |
| Link to repository / ID to entry                | 10.5281/zenodo.14841692 | Raw data upload     | Yes                                                                                                              |
| Are metadata available?                         | Available on request    | Additional comments | Absolute quantification by using 4 stable isotope labelled internal standards and Calibration Curve Preparation. |

## Sample Descriptions

### TS-FFA-072024\_number / Human / Tissues (e.g., liver, heart, brain)

|                                      |                                                                |                                      |                                           |
|--------------------------------------|----------------------------------------------------------------|--------------------------------------|-------------------------------------------|
| Perfusion                            | No                                                             | Storage time (month)                 | 120                                       |
| Storage and collection conditions    | Available                                                      | Freeze-thaw cycles                   | 0                                         |
| Provided preanalytical information   | Time to freeze (min), Storage time (month), Freeze-thaw cycles | Additives                            | None                                      |
| Temperature handling original sample | -20 °C                                                         | Were samples stored under inert gas? | No                                        |
| Instant sample preparation           | Yes                                                            | Additional preservation methods      | No                                        |
| Time to freeze (min)                 | 5                                                              | Biobank samples                      | Yes                                       |
| Snap freezing in liquid N2           | Yes                                                            | Sample homogenization                | Yes                                       |
| Storage temperature                  | -80 °C                                                         | Sample homogenization solvent        | 1. Phosphate Buffer Saline 2. Isopropanol |

# Lipid Class Descriptions

## 1) FA[M-H]<sup>-</sup> / Lipid identification

|                                                 |                                                                                                                                                                                                                                                                       |                                                        |                                                                                 |
|-------------------------------------------------|-----------------------------------------------------------------------------------------------------------------------------------------------------------------------------------------------------------------------------------------------------------------------|--------------------------------------------------------|---------------------------------------------------------------------------------|
| Lipid class                                     | FA                                                                                                                                                                                                                                                                    | Check on:                                              | -                                                                               |
| MS Level for identification                     | MS1                                                                                                                                                                                                                                                                   | Limit of detection                                     | Signal threshold                                                                |
| Identification level                            | Double bond position                                                                                                                                                                                                                                                  | RT verified by standard                                | Yes                                                                             |
| Polarity mode                                   | Negative                                                                                                                                                                                                                                                              | Separation of isobaric/isomeric interference confirmed | Yes                                                                             |
| Type of negative (precursor)ion                 | [M-H] <sup>-</sup>                                                                                                                                                                                                                                                    | Model for separation prediction                        | Yes                                                                             |
| Isotope correction at MS1                       | Type 2                                                                                                                                                                                                                                                                | Additional dimension/techniques                        | -                                                                               |
| MS1 verified by standard                        | Yes                                                                                                                                                                                                                                                                   | Lipid Identification Software                          | Xcalibur™ Software                                                              |
| Background check at MS1                         | Yes                                                                                                                                                                                                                                                                   | Data manipulation                                      | Centroiding, Lock mass correction, Background subtraction                       |
| Did you presume assumptions for identification? | Yes                                                                                                                                                                                                                                                                   | Nomenclature for intact lipid molecule                 | No                                                                              |
| Which assumptions were presumed?                | We chose palmitic acid, on the basis of our hypotheses in the proteomics experiments, and three FA (palmitoleic, oleic, and eicosapentaenoic) that exhibited statistically significant changes in the relative comparisons of FA profiles in the discovery experiment | Further identification remarks                         | Internal standard and calibration curve preparation for absolute quantification |

## 1) FA[M-H]<sup>-</sup> / Lipid quantification

|                                |                                                                                                                                  |                                |                                                                                                                                                                                      |
|--------------------------------|----------------------------------------------------------------------------------------------------------------------------------|--------------------------------|--------------------------------------------------------------------------------------------------------------------------------------------------------------------------------------|
| Quantitative                   | Yes                                                                                                                              | Type I isotope correction      | Yes                                                                                                                                                                                  |
| MS Level for quantification    | MS1                                                                                                                              | Limit of quantification        | Signal threshold                                                                                                                                                                     |
| Internal lipid standard(s) MS1 |                                                                                                                                  | Normalization to reference     | Yes                                                                                                                                                                                  |
| <b>Internal standard</b>       | <b>Endogenous subclass</b>                                                                                                       |                                |                                                                                                                                                                                      |
| Palmitoleic acid-d13           | LarodanAG(Solna,Sweden)                                                                                                          |                                |                                                                                                                                                                                      |
| Oleic acid-d9                  | LarodanAG(Solna,Sweden)                                                                                                          |                                |                                                                                                                                                                                      |
| Eicosapentaenoic acid-d5       | LarodanAG(Solna,Sweden)                                                                                                          |                                |                                                                                                                                                                                      |
| Hexadecenoic acid-d3           | LarodanAG(Solna,Sweden)                                                                                                          |                                |                                                                                                                                                                                      |
| Type of quantification         | Calibration line                                                                                                                 | Lipid Quantification Software  | Xcalibur™ Software                                                                                                                                                                   |
| Type of calibration line       | Solvent based                                                                                                                    | Batch correction               | No                                                                                                                                                                                   |
| Species calibration line       | Sigma-Aldrich: Oleic acid (C18:1 (n-9)), Palmitic acid(C16:0), Palmitoleic acid(C16:1 (n-7)), Eicosapentaenoic (20:5 (n-3)) acid | Further quantification remarks | Absolute quantification by the calibration curves (prepared with authentic non-labeled pure standards, Sigma-Aldrich) and isotopically labeled or deuterated internal standards (IS) |
| Response correction            | Response model                                                                                                                   |                                |                                                                                                                                                                                      |
