# Supplementary material for: Depletion-dependent activity-based protein profiling using SWATH/DIA-MS detects serine hydrolase lipid remodeling in lung adenocarcinoma progression
Source: Nat Commun. 2025 May 27;16:4889. doi: 10.1038/s41467-025-59564-x (PMC12117057; doi:10.1038/s41467-025-59564-x)
Supplement: Supplementary file 4 — Supplementary Data 1 [file 41467_2025_59564_MOESM4_ESM.xlsx]

## Sheet: Description
Sheet	Column	Description
List of peptide transition groups available from deep shotgun sequencing of LUAD and other human tissues for monitoring 3593 unique proteotypic SH peptides (12,653 peptide transition groups) of 215 SHs.	ProteinName	Targeted Libray information
	PrecursorMz	Targeted Libray information
	ProductMz	Targeted Libray information
	Tr_recalibrated	Retention Time
	transition_name	Peptide transition ID
	CE	Targeted Libray information
	LibraryIntensity	Targeted Libray information
	transition_group_id	Peptide transition group ID
	decoy
	PeptideSequence	Naked Peptide sequence
	Annotation	Targeted Libray information
	FullUniModPeptideName	Peptide sequence with variable modification
	PrecursorCharge	Targeted Libray information
	PeptideGroupLabel	Targeted Libray information
	UniprotID	Protein
	FragmentCharge	MS/MS
	FragmentType	Identification of b-/y-ions in MS/MS spectra.
	FragmentSeriesNumber	Targeted Libray information
	LabelType	no labeling

## Sheet: Supplementary Data 1
ProteinName	PrecursorMz	ProductMz	Tr_recalibrated	transition_name	CE	LibraryIntensity	transition_group_id	decoy	PeptideSequence	Annotation	FullUniModPeptideName	PrecursorCharge	PeptideGroupLabel	UniprotID	FragmentCharge	FragmentType	FragmentSeriesNumber	LabelType
1/P00747	731.372	1333.64	-1.4	1530253_KQLGAGSIEEC(UniMod:4)AAK_2	-1	353.4	100024_KQLGAGSIEEC(UniMod:4)AAK_2	0	KQLGAGSIEECAAK	y13/0.011,b13+18/0.011	KQLGAGSIEEC(UniMod:4)AAK	2	100024_KQLGAGSIEEC(UniMod:4)AAK_2	1/P00747	1	y	-1	light
1/P00747	731.372	1205.58	-1.4	1530251_KQLGAGSIEEC(UniMod:4)AAK_2	-1	1212.1	100024_KQLGAGSIEEC(UniMod:4)AAK_2	0	KQLGAGSIEECAAK	y12/0.008	KQLGAGSIEEC(UniMod:4)AAK	2	100024_KQLGAGSIEEC(UniMod:4)AAK_2	1/P00747	1	y	-1	light
1/P00747	731.372	1092.5	-1.4	1530250_KQLGAGSIEEC(UniMod:4)AAK_2	-1	825.6	100024_KQLGAGSIEEC(UniMod:4)AAK_2	0	KQLGAGSIEECAAK	y11/0.003	KQLGAGSIEEC(UniMod:4)AAK	2	100024_KQLGAGSIEEC(UniMod:4)AAK_2	1/P00747	1	y	-1	light
1/P00747	731.372	498.303	-1.4	1530241_KQLGAGSIEEC(UniMod:4)AAK_2	-1	356	100024_KQLGAGSIEEC(UniMod:4)AAK_2	0	KQLGAGSIEECAAK	b5/0.009	KQLGAGSIEEC(UniMod:4)AAK	2	100024_KQLGAGSIEEC(UniMod:4)AAK_2	1/P00747	1	b	-1	light
1/P00747	731.372	964.44	-1.4	1530248_KQLGAGSIEEC(UniMod:4)AAK_2	-1	645.5	100024_KQLGAGSIEEC(UniMod:4)AAK_2	0	KQLGAGSIEECAAK	y9/-0.006	KQLGAGSIEEC(UniMod:4)AAK	2	100024_KQLGAGSIEEC(UniMod:4)AAK_2	1/P00747	1	y	-1	light
1/P00747	731.372	449.218	-1.4	1530240_KQLGAGSIEEC(UniMod:4)AAK_2	-1	488.2	100024_KQLGAGSIEEC(UniMod:4)AAK_2	0	KQLGAGSIEECAAK	y4/0.012	KQLGAGSIEEC(UniMod:4)AAK	2	100024_KQLGAGSIEEC(UniMod:4)AAK_2	1/P00747	1	y	-1	light
1/P00747	487.917	449.218	-2.8	1530260_KQLGAGSIEEC(UniMod:4)AAK_3	-1	1938.9	100025_KQLGAGSIEEC(UniMod:4)AAK_3	0	KQLGAGSIEECAAK	y4/-0.000	KQLGAGSIEEC(UniMod:4)AAK	3	100025_KQLGAGSIEEC(UniMod:4)AAK_3	1/P00747	1	y	-1	light
1/P00747	487.917	555.325	-2.8	1530264_KQLGAGSIEEC(UniMod:4)AAK_3	-1	1123.3	100025_KQLGAGSIEEC(UniMod:4)AAK_3	0	KQLGAGSIEECAAK	b6/-0.005	KQLGAGSIEEC(UniMod:4)AAK	3	100025_KQLGAGSIEEC(UniMod:4)AAK_3	1/P00747	1	b	-1	light
1/P00747	487.917	755.441	-2.8	1530273_KQLGAGSIEEC(UniMod:4)AAK_3	-1	1349.4	100025_KQLGAGSIEEC(UniMod:4)AAK_3	0	KQLGAGSIEECAAK	b8/-0.002	KQLGAGSIEEC(UniMod:4)AAK	3	100025_KQLGAGSIEEC(UniMod:4)AAK_3	1/P00747	1	b	-1	light
1/P00747	487.917	707.303	-2.8	1530271_KQLGAGSIEEC(UniMod:4)AAK_3	-1	10000	100025_KQLGAGSIEEC(UniMod:4)AAK_3	0	KQLGAGSIEECAAK	y6/0.001	KQLGAGSIEEC(UniMod:4)AAK	3	100025_KQLGAGSIEEC(UniMod:4)AAK_3	1/P00747	1	y	-1	light
1/P00747	487.917	578.26	-2.8	1530265_KQLGAGSIEEC(UniMod:4)AAK_3	-1	4134.3	100025_KQLGAGSIEEC(UniMod:4)AAK_3	0	KQLGAGSIEECAAK	y5/-0.001,b11-18^2/-0.017	KQLGAGSIEEC(UniMod:4)AAK	3	100025_KQLGAGSIEEC(UniMod:4)AAK_3	1/P00747	1	y	-1	light
1/P00747	487.917	642.357	-2.8	1530268_KQLGAGSIEEC(UniMod:4)AAK_3	-1	5909.6	100025_KQLGAGSIEEC(UniMod:4)AAK_3	0	KQLGAGSIEECAAK	b7/-0.001	KQLGAGSIEEC(UniMod:4)AAK	3	100025_KQLGAGSIEEC(UniMod:4)AAK_3	1/P00747	1	b	-1	light
1/P00747	705.059	841.351	32.5	1530293_KQLGAGSIEEC(UniMod:4)AAKC(UniMod:4)EEDEEFTC(UniMod:4)R_4	-1	2869.7	100026_KQLGAGSIEEC(UniMod:4)AAKC(UniMod:4)EEDEEFTC(UniMod:4)R_4	0	KQLGAGSIEECAAKCEEDEEFTCR	y6/0.010	KQLGAGSIEEC(UniMod:4)AAKC(UniMod:4)EEDEEFTC(UniMod:4)R	4	100026_KQLGAGSIEEC(UniMod:4)AAKC(UniMod:4)EEDEEFTC(UniMod:4)R_4	1/P00747	1	y	-1	light
1/P00747	705.059	436.197	32.5	1530278_KQLGAGSIEEC(UniMod:4)AAKC(UniMod:4)EEDEEFTC(UniMod:4)R_4	-1	5842.1	100026_KQLGAGSIEEC(UniMod:4)AAKC(UniMod:4)EEDEEFTC(UniMod:4)R_4	0	KQLGAGSIEECAAKCEEDEEFTCR	y3/-0.007	KQLGAGSIEEC(UniMod:4)AAKC(UniMod:4)EEDEEFTC(UniMod:4)R	4	100026_KQLGAGSIEEC(UniMod:4)AAKC(UniMod:4)EEDEEFTC(UniMod:4)R_4	1/P00747	1	y	-1	light
1/P00747	705.059	583.266	32.5	1530282_KQLGAGSIEEC(UniMod:4)AAKC(UniMod:4)EEDEEFTC(UniMod:4)R_4	-1	5705.6	100026_KQLGAGSIEEC(UniMod:4)AAKC(UniMod:4)EEDEEFTC(UniMod:4)R_4	0	KQLGAGSIEECAAKCEEDEEFTCR	y4/-0.008	KQLGAGSIEEC(UniMod:4)AAKC(UniMod:4)EEDEEFTC(UniMod:4)R	4	100026_KQLGAGSIEEC(UniMod:4)AAKC(UniMod:4)EEDEEFTC(UniMod:4)R_4	1/P00747	1	y	-1	light
1/P00747	705.059	822.835	32.5	1530292_KQLGAGSIEEC(UniMod:4)AAKC(UniMod:4)EEDEEFTC(UniMod:4)R_4	-1	2286	100026_KQLGAGSIEEC(UniMod:4)AAKC(UniMod:4)EEDEEFTC(UniMod:4)R_4	0	KQLGAGSIEECAAKCEEDEEFTCR	y13^2/0.006	KQLGAGSIEEC(UniMod:4)AAKC(UniMod:4)EEDEEFTC(UniMod:4)R	4	100026_KQLGAGSIEEC(UniMod:4)AAKC(UniMod:4)EEDEEFTC(UniMod:4)R_4	1/P00747	2	y	-1	light
1/P00747	705.059	755.441	32.5	1530290_KQLGAGSIEEC(UniMod:4)AAKC(UniMod:4)EEDEEFTC(UniMod:4)R_4	-1	1994.6	100026_KQLGAGSIEEC(UniMod:4)AAKC(UniMod:4)EEDEEFTC(UniMod:4)R_4	0	KQLGAGSIEECAAKCEEDEEFTCR	b8/0.007	KQLGAGSIEEC(UniMod:4)AAKC(UniMod:4)EEDEEFTC(UniMod:4)R	4	100026_KQLGAGSIEEC(UniMod:4)AAKC(UniMod:4)EEDEEFTC(UniMod:4)R_4	1/P00747	1	b	-1	light
1/P00747	705.059	712.308	32.5	1530287_KQLGAGSIEEC(UniMod:4)AAKC(UniMod:4)EEDEEFTC(UniMod:4)R_4	-1	4281.7	100026_KQLGAGSIEEC(UniMod:4)AAKC(UniMod:4)EEDEEFTC(UniMod:4)R_4	0	KQLGAGSIEECAAKCEEDEEFTCR	y5/0.009	KQLGAGSIEEC(UniMod:4)AAKC(UniMod:4)EEDEEFTC(UniMod:4)R	4	100026_KQLGAGSIEEC(UniMod:4)AAKC(UniMod:4)EEDEEFTC(UniMod:4)R_4	1/P00747	1	y	-1	light
1/P54577	653.014	738.403	26.5	1395873_y6_1_IITVEKHPDADSLYVEK_3	-1	1149.6	100067_IITVEKHPDADSLYVEK_3	0	IITVEKHPDADSLYVEK	y6/-0.000	IITVEKHPDADSLYVEK	3	100067_IITVEKHPDADSLYVEK_3	1/P54577	1	y	6	light
1/P54577	653.014	538.287	26.5	1395869_y4_1_IITVEKHPDADSLYVEK_3	-1	1253.6	100067_IITVEKHPDADSLYVEK_3	0	IITVEKHPDADSLYVEK	y4/0.000	IITVEKHPDADSLYVEK	3	100067_IITVEKHPDADSLYVEK_3	1/P54577	1	y	4	light
1/P54577	653.014	1136.55	26.5	1395880_y10_1_IITVEKHPDADSLYVEK_3	-1	2989.5	100067_IITVEKHPDADSLYVEK_3	0	IITVEKHPDADSLYVEK	y10/-0.008	IITVEKHPDADSLYVEK	3	100067_IITVEKHPDADSLYVEK_3	1/P54577	1	y	10	light
1/P54577	653.014	865.933	26.5	1395876_y15_2_IITVEKHPDADSLYVEK_3	-1	7170.4	100067_IITVEKHPDADSLYVEK_3	0	IITVEKHPDADSLYVEK	y15^2/-0.004	IITVEKHPDADSLYVEK	3	100067_IITVEKHPDADSLYVEK_3	1/P54577	2	y	15	light
1/P54577	653.014	375.224	26.5	1395868_y3_1_IITVEKHPDADSLYVEK_3	-1	1193.3	100067_IITVEKHPDADSLYVEK_3	0	IITVEKHPDADSLYVEK	y3/0.002	IITVEKHPDADSLYVEK	3	100067_IITVEKHPDADSLYVEK_3	1/P54577	1	y	3	light
1/P54577	653.014	568.777	26.5	1395870_y10_2_IITVEKHPDADSLYVEK_3	-1	1332.7	100067_IITVEKHPDADSLYVEK_3	0	IITVEKHPDADSLYVEK	y10^2/-0.002	IITVEKHPDADSLYVEK	3	100067_IITVEKHPDADSLYVEK_3	1/P54577	2	y	10	light
1/P54577	490.012	610.32	25.2	1395885_b11_2_IITVEKHPDADSLYVEK_4	-1	2118.7	100068_IITVEKHPDADSLYVEK_4	0	IITVEKHPDADSLYVEK	b11^2/-0.002,b16+18^3/0.002	IITVEKHPDADSLYVEK	4	100068_IITVEKHPDADSLYVEK_4	1/P54577	2	b	11	light
1/P54577	490.012	710.378	25.2	1395889_b13_2_IITVEKHPDADSLYVEK_4	-1	2884.3	100068_IITVEKHPDADSLYVEK_4	0	IITVEKHPDADSLYVEK	b13^2/0.012	IITVEKHPDADSLYVEK	4	100068_IITVEKHPDADSLYVEK_4	1/P54577	2	b	13	light
1/P54577	490.012	701.354	25.2	1395888_y12_2_IITVEKHPDADSLYVEK_4	-1	1115.1	100068_IITVEKHPDADSLYVEK_4	0	IITVEKHPDADSLYVEK	y12^2/-0.003	IITVEKHPDADSLYVEK	4	100068_IITVEKHPDADSLYVEK_4	1/P54577	2	y	12	light
1/P54577	490.012	375.224	25.2	1395883_y3_1_IITVEKHPDADSLYVEK_4	-1	5351.7	100068_IITVEKHPDADSLYVEK_4	0	IITVEKHPDADSLYVEK	y3/0.003	IITVEKHPDADSLYVEK	4	100068_IITVEKHPDADSLYVEK_4	1/P54577	1	y	3	light
1/P54577	490.012	538.287	25.2	1395884_y4_1_IITVEKHPDADSLYVEK_4	-1	10000	100068_IITVEKHPDADSLYVEK_4	0	IITVEKHPDADSLYVEK	y4/-0.002,y14-17^3/0.018	IITVEKHPDADSLYVEK	4	100068_IITVEKHPDADSLYVEK_4	1/P54577	1	y	4	light
1/P54577	490.012	653.836	25.2	1395887_b12_2_IITVEKHPDADSLYVEK_4	-1	6925.5	100068_IITVEKHPDADSLYVEK_4	0	IITVEKHPDADSLYVEK	b12^2/0.001,m2:13^2/0.001	IITVEKHPDADSLYVEK	4	100068_IITVEKHPDADSLYVEK_4	1/P54577	2	b	12	light
1/P54577	731.632	1052.02	48.8	1395904_y19_2_IITVEKHPDADSLYVEKIDVGEAEPR_4	-1	2341.8	100069_IITVEKHPDADSLYVEKIDVGEAEPR_4	0	IITVEKHPDADSLYVEKIDVGEAEPR	y19^2/-0.014	IITVEKHPDADSLYVEKIDVGEAEPR	4	100069_IITVEKHPDADSLYVEKIDVGEAEPR_4	1/P54577	2	y	19	light
1/P54577	731.632	658.315	48.8	1395895_y6_1_IITVEKHPDADSLYVEKIDVGEAEPR_4	-1	2373.4	100069_IITVEKHPDADSLYVEKIDVGEAEPR_4	0	IITVEKHPDADSLYVEKIDVGEAEPR	y6/-0.001	IITVEKHPDADSLYVEKIDVGEAEPR	4	100069_IITVEKHPDADSLYVEKIDVGEAEPR_4	1/P54577	1	y	6	light
1/P54577	731.632	985.495	48.8	1395903_y9_1_IITVEKHPDADSLYVEKIDVGEAEPR_4	-1	3781.7	100069_IITVEKHPDADSLYVEKIDVGEAEPR_4	0	IITVEKHPDADSLYVEKIDVGEAEPR	y9/-0.002,y18-36^2/0.014	IITVEKHPDADSLYVEKIDVGEAEPR	4	100069_IITVEKHPDADSLYVEKIDVGEAEPR_4	1/P54577	1	y	9	light
1/P54577	731.632	472.251	48.8	1395892_y4_1_IITVEKHPDADSLYVEKIDVGEAEPR_4	-1	2262.7	100069_IITVEKHPDADSLYVEKIDVGEAEPR_4	0	IITVEKHPDADSLYVEKIDVGEAEPR	y4/-0.004	IITVEKHPDADSLYVEKIDVGEAEPR	4	100069_IITVEKHPDADSLYVEKIDVGEAEPR_4	1/P54577	1	y	4	light
1/P54577	731.632	757.384	48.8	1395898_y7_1_IITVEKHPDADSLYVEKIDVGEAEPR_4	-1	3938.9	100069_IITVEKHPDADSLYVEKIDVGEAEPR_4	0	IITVEKHPDADSLYVEKIDVGEAEPR	y7/-0.011	IITVEKHPDADSLYVEKIDVGEAEPR	4	100069_IITVEKHPDADSLYVEKIDVGEAEPR_4	1/P54577	1	y	7	light
1/P54577	731.632	872.411	48.8	1395901_y8_1_IITVEKHPDADSLYVEKIDVGEAEPR_4	-1	4207.9	100069_IITVEKHPDADSLYVEKIDVGEAEPR_4	0	IITVEKHPDADSLYVEKIDVGEAEPR	y8/-0.012	IITVEKHPDADSLYVEKIDVGEAEPR	4	100069_IITVEKHPDADSLYVEKIDVGEAEPR_4	1/P54577	1	y	8	light
1/Q9NZD8	510.248	694.253	-15	1396031_y6_1_IIVDDDDSK_2	-1	2043.3	100082_IIVDDDDSK_2	0	IIVDDDDSK	y6/0.003	IIVDDDDSK	2	100082_IIVDDDDSK_2	1/Q9NZD8	1	y	6	light
1/Q9NZD8	510.248	579.226	-15	1396030_y5_1_IIVDDDDSK_2	-1	1385.4	100082_IIVDDDDSK_2	0	IIVDDDDSK	y5/-0.003	IIVDDDDSK	2	100082_IIVDDDDSK_2	1/Q9NZD8	1	y	5	light
1/Q9NZD8	510.248	397.164	-15	1396028_y7_2_IIVDDDDSK_2	-1	605.9	100082_IIVDDDDSK_2	0	IIVDDDDSK	y7^2/0.006	IIVDDDDSK	2	100082_IIVDDDDSK_2	1/Q9NZD8	2	y	7	light
1/Q9NZD8	510.248	906.405	-15	1396035_y8_1_IIVDDDDSK_2	-1	1224.9	100082_IIVDDDDSK_2	0	IIVDDDDSK	y8/0.000	IIVDDDDSK	2	100082_IIVDDDDSK_2	1/Q9NZD8	1	y	8	light
1/Q9NZD8	510.248	793.321	-15	1396033_y7_1_IIVDDDDSK_2	-1	8830	100082_IIVDDDDSK_2	0	IIVDDDDSK	y7/-0.007	IIVDDDDSK	2	100082_IIVDDDDSK_2	1/Q9NZD8	1	y	7	light
1/Q9NZD8	510.248	464.199	-15	1396029_y4_1_IIVDDDDSK_2	-1	809	100082_IIVDDDDSK_2	0	IIVDDDDSK	y4/-0.007	IIVDDDDSK	2	100082_IIVDDDDSK_2	1/Q9NZD8	1	y	4	light
1/Q9UHL4	556.814	441.22	45	6494_y3_1_GALLVFAEHR_2	-1	1277.8	1001_GALLVFAEHR_2	0	GALLVFAEHR	y3/-0.000	GALLVFAEHR	2	1001_GALLVFAEHR_2	1/Q9UHL4	1	y	3	light
1/Q9UHL4	556.814	758.394	45	6498_y6_1_GALLVFAEHR_2	-1	10000	1001_GALLVFAEHR_2	0	GALLVFAEHR	y6/0.010	GALLVFAEHR	2	1001_GALLVFAEHR_2	1/Q9UHL4	1	y	6	light
1/Q9UHL4	556.814	454.302	45	6495_b5_1_GALLVFAEHR_2	-1	1301.4	1001_GALLVFAEHR_2	0	GALLVFAEHR	b5/0.005	GALLVFAEHR	2	1001_GALLVFAEHR_2	1/Q9UHL4	1	b	5	light
1/Q9UHL4	556.814	512.258	45	6496_y4_1_GALLVFAEHR_2	-1	3057.8	1001_GALLVFAEHR_2	0	GALLVFAEHR	y4/0.009	GALLVFAEHR	2	1001_GALLVFAEHR_2	1/Q9UHL4	1	y	4	light
1/Q9UHL4	556.814	355.234	45	6493_b4_1_GALLVFAEHR_2	-1	3746.5	1001_GALLVFAEHR_2	0	GALLVFAEHR	b4/-0.002	GALLVFAEHR	2	1001_GALLVFAEHR_2	1/Q9UHL4	1	b	4	light
1/Q9UHL4	556.814	659.326	45	6497_y5_1_GALLVFAEHR_2	-1	9987.8	1001_GALLVFAEHR_2	0	GALLVFAEHR	y5/0.013	GALLVFAEHR	2	1001_GALLVFAEHR_2	1/Q9UHL4	1	y	5	light
1/P68402	497.345	880.598	86.9	1396325_y8_1_IIVLGLLPR_2	-1	593.1	100103_IIVLGLLPR_2	0	IIVLGLLPR	y8/0.009	IIVLGLLPR	2	100103_IIVLGLLPR_2	1/P68402	1	y	8	light
1/P68402	497.345	439.328	86.9	1396317_b4_1_IIVLGLLPR_2	-1	909.3	100103_IIVLGLLPR_2	0	IIVLGLLPR	b4/0.001	IIVLGLLPR	2	100103_IIVLGLLPR_2	1/P68402	1	b	4	light
1/P68402	497.345	767.514	86.9	1396324_y7_1_IIVLGLLPR_2	-1	10000	100103_IIVLGLLPR_2	0	IIVLGLLPR	y7/0.008	IIVLGLLPR	2	100103_IIVLGLLPR_2	1/P68402	1	y	7	light
1/P68402	497.345	385.256	86.9	1396316_y3_1_IIVLGLLPR_2	-1	965	100103_IIVLGLLPR_2	0	IIVLGLLPR	y3/0.000	IIVLGLLPR	2	100103_IIVLGLLPR_2	1/P68402	1	y	3	light
1/P68402	497.345	668.445	86.9	1396322_y6_1_IIVLGLLPR_2	-1	5704.8	100103_IIVLGLLPR_2	0	IIVLGLLPR	y6/0.005	IIVLGLLPR	2	100103_IIVLGLLPR_2	1/P68402	1	y	6	light
1/P68402	497.345	555.361	86.9	1396320_y5_1_IIVLGLLPR_2	-1	7681.7	100103_IIVLGLLPR_2	0	IIVLGLLPR	y5/0.003	IIVLGLLPR	2	100103_IIVLGLLPR_2	1/P68402	1	y	5	light
1/P68402	472.049	724.446	62.6	1396334_y6_1_IIVLGLLPRGEKPNPLR_4	-1	1033.7	100104_IIVLGLLPRGEKPNPLR_4	0	IIVLGLLPRGEKPNPLR	y6/-0.007	IIVLGLLPRGEKPNPLR	4	100104_IIVLGLLPRGEKPNPLR_4	1/P68402	1	y	6	light
1/P68402	472.049	723.931	62.6	1396333_y13_2_IIVLGLLPRGEKPNPLR_4	-1	7884.4	100104_IIVLGLLPRGEKPNPLR_4	0	IIVLGLLPRGEKPNPLR	y13^2/0.006	IIVLGLLPRGEKPNPLR	4	100104_IIVLGLLPRGEKPNPLR_4	1/P68402	2	y	13	light
1/P68402	472.049	638.878	62.6	1396331_y11_2_IIVLGLLPRGEKPNPLR_4	-1	750.7	100104_IIVLGLLPRGEKPNPLR_4	0	IIVLGLLPRGEKPNPLR	y11^2/-0.005	IIVLGLLPRGEKPNPLR	4	100104_IIVLGLLPRGEKPNPLR_4	1/P68402	2	y	11	light
1/P68402	472.049	582.336	62.6	1396329_y10_2_IIVLGLLPRGEKPNPLR_4	-1	776.8	100104_IIVLGLLPRGEKPNPLR_4	0	IIVLGLLPRGEKPNPLR	y10^2/0.007	IIVLGLLPRGEKPNPLR	4	100104_IIVLGLLPRGEKPNPLR_4	1/P68402	2	y	10	light
1/P68402	472.049	596.351	62.6	1396330_y5_1_IIVLGLLPRGEKPNPLR_4	-1	1059.8	100104_IIVLGLLPRGEKPNPLR_4	0	IIVLGLLPRGEKPNPLR	y5/0.001	IIVLGLLPRGEKPNPLR	4	100104_IIVLGLLPRGEKPNPLR_4	1/P68402	1	y	5	light
1/P68402	472.049	780.473	62.6	1396335_y14_2_IIVLGLLPRGEKPNPLR_4	-1	2555.2	100104_IIVLGLLPRGEKPNPLR_4	0	IIVLGLLPRGEKPNPLR	y14^2/-0.011	IIVLGLLPRGEKPNPLR	4	100104_IIVLGLLPRGEKPNPLR_4	1/P68402	2	y	14	light
1/P54577	425.207	375.224	4	96200_y3_1_HPDADSLYVEK_3	-1	3705.9	10011_HPDADSLYVEK_3	0	HPDADSLYVEK	y3/0.004	HPDADSLYVEK	3	10011_HPDADSLYVEK_3	1/P54577	1	y	3	light
1/P54577	425.207	536.21	4	96202_b5_1_HPDADSLYVEK_3	-1	2290.9	10011_HPDADSLYVEK_3	0	HPDADSLYVEK	b5/0.004	HPDADSLYVEK	3	10011_HPDADSLYVEK_3	1/P54577	1	b	5	light
1/P54577	425.207	421.183	4	96201_b4_1_HPDADSLYVEK_3	-1	1684.5	10011_HPDADSLYVEK_3	0	HPDADSLYVEK	b4/-0.011	HPDADSLYVEK	3	10011_HPDADSLYVEK_3	1/P54577	1	b	4	light
1/P54577	425.207	651.371	4	96205_y5_1_HPDADSLYVEK_3	-1	2223.5	10011_HPDADSLYVEK_3	0	HPDADSLYVEK	y5/0.005	HPDADSLYVEK	3	10011_HPDADSLYVEK_3	1/P54577	1	y	5	light
1/P54577	425.207	623.242	4	96204_b6_1_HPDADSLYVEK_3	-1	4918.7	10011_HPDADSLYVEK_3	0	HPDADSLYVEK	b6/-0.006	HPDADSLYVEK	3	10011_HPDADSLYVEK_3	1/P54577	1	b	6	light
1/P54577	425.207	538.287	4	96203_y4_1_HPDADSLYVEK_3	-1	10000	10011_HPDADSLYVEK_3	0	HPDADSLYVEK	y4/-0.005	HPDADSLYVEK	3	10011_HPDADSLYVEK_3	1/P54577	1	y	4	light
1/P48147	746.928	1035.62	16.1	1532386_KQSNPLLIHVDTK_2	-1	865.6	100151_KQSNPLLIHVDTK_2	0	KQSNPLLIHVDTK	y9/-0.017	KQSNPLLIHVDTK	2	100151_KQSNPLLIHVDTK_2	1/P48147	1	y	-1	light
1/P48147	746.928	623.351	16.1	1532381_KQSNPLLIHVDTK_2	-1	928.3	100151_KQSNPLLIHVDTK_2	0	KQSNPLLIHVDTK	b11^2/-0.005,b6-45/-0.005	KQSNPLLIHVDTK	2	100151_KQSNPLLIHVDTK_2	1/P48147	2	b	-1	light
1/P48147	746.928	363.187	16.1	1532377_KQSNPLLIHVDTK_2	-1	925.9	100151_KQSNPLLIHVDTK_2	0	KQSNPLLIHVDTK	y3/0.010	KQSNPLLIHVDTK	2	100151_KQSNPLLIHVDTK_2	1/P48147	1	y	-1	light
1/P48147	746.928	462.256	16.1	1532378_KQSNPLLIHVDTK_2	-1	1129.3	100151_KQSNPLLIHVDTK_2	0	KQSNPLLIHVDTK	y4/-0.006	KQSNPLLIHVDTK	2	100151_KQSNPLLIHVDTK_2	1/P48147	1	y	-1	light
1/P48147	746.928	673.875	16.1	1532382_KQSNPLLIHVDTK_2	-1	1063	100151_KQSNPLLIHVDTK_2	0	KQSNPLLIHVDTK	b12^2/0.006,y12-18^2/0.006	KQSNPLLIHVDTK	2	100151_KQSNPLLIHVDTK_2	1/P48147	2	b	-1	light
1/P48147	746.928	599.315	16.1	1532380_KQSNPLLIHVDTK_2	-1	1468.3	100151_KQSNPLLIHVDTK_2	0	KQSNPLLIHVDTK	y5/-0.005	KQSNPLLIHVDTK	2	100151_KQSNPLLIHVDTK_2	1/P48147	1	y	-1	light
1/Q5VWZ2	514.3	369.224	17.9	1396955_y3_1_IIYPTAPPR_2	-1	2040	100152_IIYPTAPPR_2	0	IIYPTAPPR	y3/0.001	IIYPTAPPR	2	100152_IIYPTAPPR_2	1/Q5VWZ2	1	y	3	light
1/Q5VWZ2	514.3	440.262	17.9	1396958_y4_1_IIYPTAPPR_2	-1	1522.8	100152_IIYPTAPPR_2	0	IIYPTAPPR	y4/0.004	IIYPTAPPR	2	100152_IIYPTAPPR_2	1/Q5VWZ2	1	y	4	light
1/Q5VWZ2	514.3	401.216	17.9	1396957_y7_2_IIYPTAPPR_2	-1	801.4	100152_IIYPTAPPR_2	0	IIYPTAPPR	y7^2/0.005	IIYPTAPPR	2	100152_IIYPTAPPR_2	1/Q5VWZ2	2	y	7	light
1/Q5VWZ2	514.3	541.309	17.9	1396959_y5_1_IIYPTAPPR_2	-1	2753	100152_IIYPTAPPR_2	0	IIYPTAPPR	y5/0.008	IIYPTAPPR	2	100152_IIYPTAPPR_2	1/Q5VWZ2	1	y	5	light
1/Q5VWZ2	514.3	390.239	17.9	1396956_b3_1_IIYPTAPPR_2	-1	1742.3	100152_IIYPTAPPR_2	0	IIYPTAPPR	b3/0.001	IIYPTAPPR	2	100152_IIYPTAPPR_2	1/Q5VWZ2	1	b	3	light
1/Q5VWZ2	514.3	638.362	17.9	1396960_y6_1_IIYPTAPPR_2	-1	10000	100152_IIYPTAPPR_2	0	IIYPTAPPR	y6/0.013	IIYPTAPPR	2	100152_IIYPTAPPR_2	1/Q5VWZ2	1	y	6	light
1/P48147	498.288	458.236	16.3	1532392_KQSNPLLIHVDTK_3	-1	948.1	100152_KQSNPLLIHVDTK_3	0	KQSNPLLIHVDTK	b4/0.006	KQSNPLLIHVDTK	3	100152_KQSNPLLIHVDTK_3	1/P48147	1	b	-1	light
1/P48147	498.288	462.256	16.3	1532393_KQSNPLLIHVDTK_3	-1	529.8	100152_KQSNPLLIHVDTK_3	0	KQSNPLLIHVDTK	y4/-0.003	KQSNPLLIHVDTK	3	100152_KQSNPLLIHVDTK_3	1/P48147	1	y	-1	light
1/P48147	498.288	599.315	16.3	1532397_KQSNPLLIHVDTK_3	-1	887.2	100152_KQSNPLLIHVDTK_3	0	KQSNPLLIHVDTK	y5/-0.002	KQSNPLLIHVDTK	3	100152_KQSNPLLIHVDTK_3	1/P48147	1	y	-1	light
1/P48147	498.288	712.399	16.3	1532401_KQSNPLLIHVDTK_3	-1	770.3	100152_KQSNPLLIHVDTK_3	0	KQSNPLLIHVDTK	y6/-0.004	KQSNPLLIHVDTK	3	100152_KQSNPLLIHVDTK_3	1/P48147	1	y	-1	light
1/P48147	498.288	623.351	16.3	1532398_KQSNPLLIHVDTK_3	-1	2502.3	100152_KQSNPLLIHVDTK_3	0	KQSNPLLIHVDTK	b11^2/0.001,b6-45/0.001	KQSNPLLIHVDTK	3	100152_KQSNPLLIHVDTK_3	1/P48147	2	b	-1	light
1/P48147	498.288	825.483	16.3	1532403_KQSNPLLIHVDTK_3	-1	577.8	100152_KQSNPLLIHVDTK_3	0	KQSNPLLIHVDTK	y7/-0.012	KQSNPLLIHVDTK	3	100152_KQSNPLLIHVDTK_3	1/P48147	1	y	-1	light
1/P83111	920.015	585.324	45.9	1397643_b5_1_IKDEVGAPGIVVGVSVDGK_2	-1	1800	100196_IKDEVGAPGIVVGVSVDGK_2	0	IKDEVGAPGIVVGVSVDGK	b5/-0.003	IKDEVGAPGIVVGVSVDGK	2	100196_IKDEVGAPGIVVGVSVDGK_2	1/P83111	1	b	5	light
1/P83111	920.015	505.262	45.9	1397641_y5_1_IKDEVGAPGIVVGVSVDGK_2	-1	2440	100196_IKDEVGAPGIVVGVSVDGK_2	0	IKDEVGAPGIVVGVSVDGK	[y5/-0.019]	IKDEVGAPGIVVGVSVDGK	2	100196_IKDEVGAPGIVVGVSVDGK_2	1/P83111	1	y	5	light
1/P83111	920.015	713.383	45.9	1397646_b7_1_IKDEVGAPGIVVGVSVDGK_2	-1	2220	100196_IKDEVGAPGIVVGVSVDGK_2	0	IKDEVGAPGIVVGVSVDGK	b7/0.002,m11:18/0.002	IKDEVGAPGIVVGVSVDGK	2	100196_IKDEVGAPGIVVGVSVDGK_2	1/P83111	1	b	7	light
1/P83111	920.015	1126.65	45.9	1397650_y12_1_IKDEVGAPGIVVGVSVDGK_2	-1	6540	100196_IKDEVGAPGIVVGVSVDGK_2	0	IKDEVGAPGIVVGVSVDGK	y12/0.011	IKDEVGAPGIVVGVSVDGK	2	100196_IKDEVGAPGIVVGVSVDGK_2	1/P83111	1	y	12	light
1/P83111	920.015	1597.84	45.9	1397655_y17_1_IKDEVGAPGIVVGVSVDGK_2	-1	2459.3	100196_IKDEVGAPGIVVGVSVDGK_2	0	IKDEVGAPGIVVGVSVDGK	y17/-0.012	IKDEVGAPGIVVGVSVDGK	2	100196_IKDEVGAPGIVVGVSVDGK_2	1/P83111	1	y	17	light
1/P83111	920.015	760.42	45.9	1397647_y8_1_IKDEVGAPGIVVGVSVDGK_2	-1	1820	100196_IKDEVGAPGIVVGVSVDGK_2	0	IKDEVGAPGIVVGVSVDGK	y8/-0.014	IKDEVGAPGIVVGVSVDGK	2	100196_IKDEVGAPGIVVGVSVDGK_2	1/P83111	1	y	8	light
1/P83111	613.679	661.352	46.9	1397668_y7_1_IKDEVGAPGIVVGVSVDGK_3	-1	10000	100197_IKDEVGAPGIVVGVSVDGK_3	0	IKDEVGAPGIVVGVSVDGK	y7/0.007	IKDEVGAPGIVVGVSVDGK	3	100197_IKDEVGAPGIVVGVSVDGK_3	1/P83111	1	y	7	light
1/P83111	613.679	505.262	46.9	1397661_y5_1_IKDEVGAPGIVVGVSVDGK_3	-1	3063.9	100197_IKDEVGAPGIVVGVSVDGK_3	0	IKDEVGAPGIVVGVSVDGK	y5/0.004	IKDEVGAPGIVVGVSVDGK	3	100197_IKDEVGAPGIVVGVSVDGK_3	1/P83111	1	y	5	light
1/P83111	613.679	1079.61	46.9	1397677_b11_1_IKDEVGAPGIVVGVSVDGK_3	-1	1892.1	100197_IKDEVGAPGIVVGVSVDGK_3	0	IKDEVGAPGIVVGVSVDGK	b11/0.012	IKDEVGAPGIVVGVSVDGK	3	100197_IKDEVGAPGIVVGVSVDGK_3	1/P83111	1	b	11	light
1/P83111	613.679	980.541	46.9	1397675_b10_1_IKDEVGAPGIVVGVSVDGK_3	-1	2795	100197_IKDEVGAPGIVVGVSVDGK_3	0	IKDEVGAPGIVVGVSVDGK	b10/-0.008,m8:18/-0.008	IKDEVGAPGIVVGVSVDGK	3	100197_IKDEVGAPGIVVGVSVDGK_3	1/P83111	1	b	10	light
1/P83111	613.679	713.383	46.9	1397670_b7_1_IKDEVGAPGIVVGVSVDGK_3	-1	2097.7	100197_IKDEVGAPGIVVGVSVDGK_3	0	IKDEVGAPGIVVGVSVDGK	b7/-0.004,m11:18/-0.004	IKDEVGAPGIVVGVSVDGK	3	100197_IKDEVGAPGIVVGVSVDGK_3	1/P83111	1	b	7	light
1/P83111	613.679	760.42	46.9	1397671_y8_1_IKDEVGAPGIVVGVSVDGK_3	-1	3090	100197_IKDEVGAPGIVVGVSVDGK_3	0	IKDEVGAPGIVVGVSVDGK	y8/0.008	IKDEVGAPGIVVGVSVDGK	3	100197_IKDEVGAPGIVVGVSVDGK_3	1/P83111	1	y	8	light
1/P10619	491.914	737.383	38.1	97057_y6_1_HLHYWFVESQK_3	-1	1921.3	10022_HLHYWFVESQK_3	0	HLHYWFVESQK	y6/-0.009	HLHYWFVESQK	3	10022_HLHYWFVESQK_3	1/P10619	1	y	6	light
1/P10619	491.914	388.209	38.1	97047_b3_1_HLHYWFVESQK_3	-1	801.3	10022_HLHYWFVESQK_3	0	HLHYWFVESQK	b3/0.001	HLHYWFVESQK	3	10022_HLHYWFVESQK_3	1/P10619	1	b	3	light
1/P10619	491.914	369.18	38.1	97046_b5_2_HLHYWFVESQK_3	-1	1407.9	10022_HLHYWFVESQK_3	0	HLHYWFVESQK	b5^2/-0.000,y6^2/-0.016	HLHYWFVESQK	3	10022_HLHYWFVESQK_3	1/P10619	2	b	5	light
1/P10619	491.914	590.314	38.1	97054_y5_1_HLHYWFVESQK_3	-1	1114.8	10022_HLHYWFVESQK_3	0	HLHYWFVESQK	y5/-0.002,y9-44^2/0.011	HLHYWFVESQK	3	10022_HLHYWFVESQK_3	1/P10619	1	y	5	light
1/P10619	491.914	737.352	38.1	97056_b5_1_HLHYWFVESQK_3	-1	731.1	10022_HLHYWFVESQK_3	0	HLHYWFVESQK	b5/0.012	HLHYWFVESQK	3	10022_HLHYWFVESQK_3	1/P10619	1	b	5	light
1/P10619	491.914	551.272	38.1	97052_b4_1_HLHYWFVESQK_3	-1	1004.4	10022_HLHYWFVESQK_3	0	HLHYWFVESQK	b4/0.003	HLHYWFVESQK	3	10022_HLHYWFVESQK_3	1/P10619	1	b	4	light
1/Q8TF72	1166.04	604.294	17.1	1399004_y5_1_IKEMPAEVNEEEEQADVNEK_2	-1	5607.6	100285_IKEMPAEVNEEEEQADVNEK_2	0	IKEMPAEVNEEEEQADVNEK	y5/0.001	IKEMPAEVNEEEEQADVNEK	2	100285_IKEMPAEVNEEEEQADVNEK_2	1/Q8TF72	1	y	5	light
1/Q8TF72	1166.04	1829.8	17.1	1399009_y16_1_IKEMPAEVNEEEEQADVNEK_2	-1	5523.8	100285_IKEMPAEVNEEEEQADVNEK_2	0	IKEMPAEVNEEEEQADVNEK	[y16/-0.017]	IKEMPAEVNEEEEQADVNEK	2	100285_IKEMPAEVNEEEEQADVNEK_2	1/Q8TF72	1	y	16	light
1/Q8TF72	1166.04	390.198	17.1	1399001_y3_1_IKEMPAEVNEEEEQADVNEK_2	-1	6390.9	100285_IKEMPAEVNEEEEQADVNEK_2	0	IKEMPAEVNEEEEQADVNEK	y3/-0.001	IKEMPAEVNEEEEQADVNEK	2	100285_IKEMPAEVNEEEEQADVNEK_2	1/Q8TF72	1	y	3	light
1/Q8TF72	1166.04	1061.47	17.1	1399008_y9_1_IKEMPAEVNEEEEQADVNEK_2	-1	3247.6	100285_IKEMPAEVNEEEEQADVNEK_2	0	IKEMPAEVNEEEEQADVNEK	y9/-0.009	IKEMPAEVNEEEEQADVNEK	2	100285_IKEMPAEVNEEEEQADVNEK_2	1/Q8TF72	1	y	9	light
1/Q8TF72	1166.04	371.229	17.1	1399000_b3_1_IKEMPAEVNEEEEQADVNEK_2	-1	5386.8	100285_IKEMPAEVNEEEEQADVNEK_2	0	IKEMPAEVNEEEEQADVNEK	b3/-0.000	IKEMPAEVNEEEEQADVNEK	2	100285_IKEMPAEVNEEEEQADVNEK_2	1/Q8TF72	1	b	3	light
1/Q8TF72	1166.04	489.267	17.1	1399002_y4_1_IKEMPAEVNEEEEQADVNEK_2	-1	6329.2	100285_IKEMPAEVNEEEEQADVNEK_2	0	IKEMPAEVNEEEEQADVNEK	y4/-0.001	IKEMPAEVNEEEEQADVNEK	2	100285_IKEMPAEVNEEEEQADVNEK_2	1/Q8TF72	1	y	4	light
1/Q8TF72	777.693	604.294	16.2	1399016_y5_1_IKEMPAEVNEEEEQADVNEK_3	-1	5163.4	100286_IKEMPAEVNEEEEQADVNEK_3	0	IKEMPAEVNEEEEQADVNEK	[y5/0.012]	IKEMPAEVNEEEEQADVNEK	3	100286_IKEMPAEVNEEEEQADVNEK_3	1/Q8TF72	1	y	5	light
1/Q8TF72	777.693	803.389	16.2	1399022_y7_1_IKEMPAEVNEEEEQADVNEK_3	-1	5604.6	100286_IKEMPAEVNEEEEQADVNEK_3	0	IKEMPAEVNEEEEQADVNEK	y7/0.003	IKEMPAEVNEEEEQADVNEK	3	100286_IKEMPAEVNEEEEQADVNEK_3	1/Q8TF72	1	y	7	light
1/Q8TF72	777.693	489.267	16.2	1399013_y4_1_IKEMPAEVNEEEEQADVNEK_3	-1	7313.6	100286_IKEMPAEVNEEEEQADVNEK_3	0	IKEMPAEVNEEEEQADVNEK	y4/0.003	IKEMPAEVNEEEEQADVNEK	3	100286_IKEMPAEVNEEEEQADVNEK_3	1/Q8TF72	1	y	4	light
1/Q8TF72	777.693	799.402	16.2	1399021_b7_1_IKEMPAEVNEEEEQADVNEK_3	-1	5007	100286_IKEMPAEVNEEEEQADVNEK_3	0	IKEMPAEVNEEEEQADVNEK	b7/0.005	IKEMPAEVNEEEEQADVNEK	3	100286_IKEMPAEVNEEEEQADVNEK_3	1/Q8TF72	1	b	7	light
1/Q8TF72	777.693	675.331	16.2	1399018_y6_1_IKEMPAEVNEEEEQADVNEK_3	-1	10000	100286_IKEMPAEVNEEEEQADVNEK_3	0	IKEMPAEVNEEEEQADVNEK	y6/0.005	IKEMPAEVNEEEEQADVNEK	3	100286_IKEMPAEVNEEEEQADVNEK_3	1/Q8TF72	1	y	6	light
1/Q8TF72	777.693	390.198	16.2	1399012_y3_1_IKEMPAEVNEEEEQADVNEK_3	-1	8999	100286_IKEMPAEVNEEEEQADVNEK_3	0	IKEMPAEVNEEEEQADVNEK	y3/0.001	IKEMPAEVNEEEEQADVNEK	3	100286_IKEMPAEVNEEEEQADVNEK_3	1/Q8TF72	1	y	3	light
1/Q8NCC3	628.351	702.378	61.4	96407_y6_1_HPPVVLVPGDLGNQLEAK_3	-1	1389.4	10033_HPPVVLVPGDLGNQLEAK_3	0	HPPVVLVPGDLGNQLEAK	y6/0.013	HPPVVLVPGDLGNQLEAK	3	10033_HPPVVLVPGDLGNQLEAK_3	1/Q8NCC3	1	y	6	light
1/Q8NCC3	628.351	643.393	61.4	96406_b6_1_HPPVVLVPGDLGNQLEAK_3	-1	6749.9	10033_HPPVVLVPGDLGNQLEAK_3	0	HPPVVLVPGDLGNQLEAK	b6/0.013	HPPVVLVPGDLGNQLEAK	3	10033_HPPVVLVPGDLGNQLEAK_3	1/Q8NCC3	1	b	6	light
1/Q8NCC3	628.351	742.461	61.4	96408_b7_1_HPPVVLVPGDLGNQLEAK_3	-1	10000	10033_HPPVVLVPGDLGNQLEAK_3	0	HPPVVLVPGDLGNQLEAK	b7/0.016	HPPVVLVPGDLGNQLEAK	3	10033_HPPVVLVPGDLGNQLEAK_3	1/Q8NCC3	1	b	7	light
1/Q8NCC3	628.351	759.4	61.4	96409_y7_1_HPPVVLVPGDLGNQLEAK_3	-1	4642.5	10033_HPPVVLVPGDLGNQLEAK_3	0	HPPVVLVPGDLGNQLEAK	y7/0.016	HPPVVLVPGDLGNQLEAK	3	10033_HPPVVLVPGDLGNQLEAK_3	1/Q8NCC3	1	y	7	light
1/Q8NCC3	628.351	530.309	61.4	96404_b5_1_HPPVVLVPGDLGNQLEAK_3	-1	3677.5	10033_HPPVVLVPGDLGNQLEAK_3	0	HPPVVLVPGDLGNQLEAK	b5/0.009	HPPVVLVPGDLGNQLEAK	3	10033_HPPVVLVPGDLGNQLEAK_3	1/Q8NCC3	1	b	5	light
1/Q8NCC3	628.351	571.296	61.4	96405_y11_2_HPPVVLVPGDLGNQLEAK_3	-1	4304.8	10033_HPPVVLVPGDLGNQLEAK_3	0	HPPVVLVPGDLGNQLEAK	y11^2/0.012,y5-17/-0.000	HPPVVLVPGDLGNQLEAK	3	10033_HPPVVLVPGDLGNQLEAK_3	1/Q8NCC3	2	y	11	light
1/P02787	689.354	889.478	26.7	1535742_KSASDLTWDNLK_2	-1	472.2	100350_KSASDLTWDNLK_2	0	KSASDLTWDNLK	y7/0.007	KSASDLTWDNLK	2	100350_KSASDLTWDNLK_2	1/P02787	1	y	-1	light
1/P02787	689.354	374.24	26.7	1535735_KSASDLTWDNLK_2	-1	605	100350_KSASDLTWDNLK_2	0	KSASDLTWDNLK	y3/-0.003	KSASDLTWDNLK	2	100350_KSASDLTWDNLK_2	1/P02787	1	y	-1	light
1/P02787	689.354	1162.57	26.7	1535747_KSASDLTWDNLK_2	-1	456	100350_KSASDLTWDNLK_2	0	KSASDLTWDNLK	y10/0.002	KSASDLTWDNLK	2	100350_KSASDLTWDNLK_2	1/P02787	1	y	-1	light
1/P02787	689.354	1249.61	26.7	1535749_KSASDLTWDNLK_2	-1	786.7	100350_KSASDLTWDNLK_2	0	KSASDLTWDNLK	y11/0.006,b11+18/0.006	KSASDLTWDNLK	2	100350_KSASDLTWDNLK_2	1/P02787	1	y	-1	light
1/P02787	689.354	1004.5	26.7	1535744_KSASDLTWDNLK_2	-1	419.1	100350_KSASDLTWDNLK_2	0	KSASDLTWDNLK	y8/-0.013	KSASDLTWDNLK	2	100350_KSASDLTWDNLK_2	1/P02787	1	y	-1	light
1/P02787	689.354	489.23	26.7	1535736_KSASDLTWDNLK_2	-1	540.8	100350_KSASDLTWDNLK_2	0	KSASDLTWDNLK	b5/0.018,y4/-0.019	KSASDLTWDNLK	2	100350_KSASDLTWDNLK_2	1/P02787	1	b	-1	light
1/P02787	459.905	602.314	29	1535756_KSASDLTWDNLK_3	-1	6840.1	100351_KSASDLTWDNLK_3	0	KSASDLTWDNLK	b6/-0.002,a11^2/0.009,y11-46^2/0.009	KSASDLTWDNLK	3	100351_KSASDLTWDNLK_3	1/P02787	1	b	-1	light
1/P02787	459.905	675.346	29	1535760_KSASDLTWDNLK_3	-1	10000	100351_KSASDLTWDNLK_3	0	KSASDLTWDNLK	y5/-0.003	KSASDLTWDNLK	3	100351_KSASDLTWDNLK_3	1/P02787	1	y	-1	light
1/P02787	459.905	489.23	29	1535753_KSASDLTWDNLK_3	-1	7469.3	100351_KSASDLTWDNLK_3	0	KSASDLTWDNLK	b5/0.010	KSASDLTWDNLK	3	100351_KSASDLTWDNLK_3	1/P02787	1	b	-1	light
1/P02787	459.905	489.267	29	1535754_KSASDLTWDNLK_3	-1	4037	100351_KSASDLTWDNLK_3	0	KSASDLTWDNLK	y4/-0.008	KSASDLTWDNLK	3	100351_KSASDLTWDNLK_3	1/P02787	1	y	-1	light
1/P02787	459.905	776.394	29	1535762_KSASDLTWDNLK_3	-1	2686.5	100351_KSASDLTWDNLK_3	0	KSASDLTWDNLK	y6/-0.000	KSASDLTWDNLK	3	100351_KSASDLTWDNLK_3	1/P02787	1	y	-1	light
1/P02787	459.905	703.362	29	1535761_KSASDLTWDNLK_3	-1	2155.4	100351_KSASDLTWDNLK_3	0	KSASDLTWDNLK	b7/-0.001	KSASDLTWDNLK	3	100351_KSASDLTWDNLK_3	1/P02787	1	b	-1	light
1/P02788	537.261	561.299	-44	1535987_KSC(UniMod:4)HTAVDR_2	-1	2150.9	100366_KSC(UniMod:4)HTAVDR_2	0	KSCHTAVDR	y5/0.001	KSC(UniMod:4)HTAVDR	2	100366_KSC(UniMod:4)HTAVDR_2	1/P02788	1	y	-1	light
1/P02788	537.261	698.358	-44	1535990_KSC(UniMod:4)HTAVDR_2	-1	1547.4	100366_KSC(UniMod:4)HTAVDR_2	0	KSCHTAVDR	y6/0.003	KSC(UniMod:4)HTAVDR	2	100366_KSC(UniMod:4)HTAVDR_2	1/P02788	1	y	-1	light
1/P02788	537.261	945.421	-44	1535994_KSC(UniMod:4)HTAVDR_2	-1	2545.8	100366_KSC(UniMod:4)HTAVDR_2	0	KSCHTAVDR	y8/-0.002	KSC(UniMod:4)HTAVDR	2	100366_KSC(UniMod:4)HTAVDR_2	1/P02788	1	y	-1	light
1/P02788	537.261	473.214	-44	1535985_KSC(UniMod:4)HTAVDR_2	-1	726.1	100366_KSC(UniMod:4)HTAVDR_2	0	KSCHTAVDR	y8^2/0.002	KSC(UniMod:4)HTAVDR	2	100366_KSC(UniMod:4)HTAVDR_2	1/P02788	2	y	-1	light
1/P02788	537.261	460.251	-44	1535984_KSC(UniMod:4)HTAVDR_2	-1	1136.6	100366_KSC(UniMod:4)HTAVDR_2	0	KSCHTAVDR	y4/0.001	KSC(UniMod:4)HTAVDR	2	100366_KSC(UniMod:4)HTAVDR_2	1/P02788	1	y	-1	light
1/P02788	537.261	858.389	-44	1535992_KSC(UniMod:4)HTAVDR_2	-1	1212.8	100366_KSC(UniMod:4)HTAVDR_2	0	KSCHTAVDR	y7/-0.001	KSC(UniMod:4)HTAVDR	2	100366_KSC(UniMod:4)HTAVDR_2	1/P02788	1	y	-1	light
1/Q86TI2	782.086	821.452	88	96483_y7_1_HPTVLFVYGGPQVQLVNNSFK_3	-1	6047.3	10040_HPTVLFVYGGPQVQLVNNSFK_3	0	HPTVLFVYGGPQVQLVNNSFK	y7/0.008	HPTVLFVYGGPQVQLVNNSFK	3	10040_HPTVLFVYGGPQVQLVNNSFK_3	1/Q86TI2	1	y	7	light
1/Q86TI2	782.086	609.299	88	96478_y5_1_HPTVLFVYGGPQVQLVNNSFK_3	-1	6178.6	10040_HPTVLFVYGGPQVQLVNNSFK_3	0	HPTVLFVYGGPQVQLVNNSFK	y5/0.000	HPTVLFVYGGPQVQLVNNSFK	3	10040_HPTVLFVYGGPQVQLVNNSFK_3	1/Q86TI2	1	y	5	light
1/Q86TI2	782.086	708.368	88	96481_y6_1_HPTVLFVYGGPQVQLVNNSFK_3	-1	8188.7	10040_HPTVLFVYGGPQVQLVNNSFK_3	0	HPTVLFVYGGPQVQLVNNSFK	y6/0.008	HPTVLFVYGGPQVQLVNNSFK	3	10040_HPTVLFVYGGPQVQLVNNSFK_3	1/Q86TI2	1	y	6	light
1/Q86TI2	782.086	957.519	88	96485_b8_1_HPTVLFVYGGPQVQLVNNSFK_3	-1	5142.5	10040_HPTVLFVYGGPQVQLVNNSFK_3	0	HPTVLFVYGGPQVQLVNNSFK	b8/0.017	HPTVLFVYGGPQVQLVNNSFK	3	10040_HPTVLFVYGGPQVQLVNNSFK_3	1/Q86TI2	1	b	8	light
1/Q86TI2	782.086	794.456	88	96482_b7_1_HPTVLFVYGGPQVQLVNNSFK_3	-1	6621.3	10040_HPTVLFVYGGPQVQLVNNSFK_3	0	HPTVLFVYGGPQVQLVNNSFK	b7/0.001	HPTVLFVYGGPQVQLVNNSFK	3	10040_HPTVLFVYGGPQVQLVNNSFK_3	1/Q86TI2	1	b	7	light
1/Q86TI2	782.086	949.51	88	96484_y8_1_HPTVLFVYGGPQVQLVNNSFK_3	-1	8097.7	10040_HPTVLFVYGGPQVQLVNNSFK_3	0	HPTVLFVYGGPQVQLVNNSFK	y8/0.012	HPTVLFVYGGPQVQLVNNSFK	3	10040_HPTVLFVYGGPQVQLVNNSFK_3	1/Q86TI2	1	y	8	light
1/P02788	509.762	416.262	-34.6	1537230_KSEEEVAAR_2	-1	1038.5	100442_KSEEEVAAR_2	0	KSEEEVAAR	y4/0.003	KSEEEVAAR	2	100442_KSEEEVAAR_2	1/P02788	1	y	-1	light
1/P02788	509.762	844.405	-34.6	1537238_KSEEEVAAR_2	-1	104.9	100442_KSEEEVAAR_2	0	KSEEEVAAR	b8/0.006,y8-46/-0.006	KSEEEVAAR	2	100442_KSEEEVAAR_2	1/P02788	1	b	-1	light
1/P02788	509.762	890.421	-34.6	1537239_KSEEEVAAR_2	-1	6054.4	100442_KSEEEVAAR_2	0	KSEEEVAAR	y8/-0.004	KSEEEVAAR	2	100442_KSEEEVAAR_2	1/P02788	1	y	-1	light
1/P02788	509.762	803.389	-34.6	1537237_KSEEEVAAR_2	-1	2274.6	100442_KSEEEVAAR_2	0	KSEEEVAAR	y7/-0.004	KSEEEVAAR	2	100442_KSEEEVAAR_2	1/P02788	1	y	-1	light
1/P02788	509.762	545.304	-34.6	1537232_KSEEEVAAR_2	-1	1188.1	100442_KSEEEVAAR_2	0	KSEEEVAAR	y5/-0.002	KSEEEVAAR	2	100442_KSEEEVAAR_2	1/P02788	1	y	-1	light
1/P02788	509.762	674.347	-34.6	1537234_KSEEEVAAR_2	-1	1678.4	100442_KSEEEVAAR_2	0	KSEEEVAAR	y6/0.001,a6/0.012	KSEEEVAAR	2	100442_KSEEEVAAR_2	1/P02788	1	y	-1	light
1/P02788	587.812	473.294	-38	1537243_KSEEEVAARR_2	-1	95.4	100443_KSEEEVAARR_2	0	KSEEEVAARR	y4/-0.011	KSEEEVAARR	2	100443_KSEEEVAARR_2	1/P02788	1	y	-1	light
1/P02788	587.812	1000.51	-38	1537253_KSEEEVAARR_2	-1	208.8	100443_KSEEEVAARR_2	0	KSEEEVAARR	b9/-0.003,y9-46/-0.015	KSEEEVAARR	2	100443_KSEEEVAARR_2	1/P02788	1	b	-1	light
1/P02788	587.812	415.728	-38	1537242_KSEEEVAARR_2	-1	103.9	100443_KSEEEVAARR_2	0	KSEEEVAARR	y7^2/0.004	KSEEEVAARR	2	100443_KSEEEVAARR_2	1/P02788	2	y	-1	light
1/P02788	587.812	523.765	-38	1537246_KSEEEVAARR_2	-1	97.4	100443_KSEEEVAARR_2	0	KSEEEVAARR	y9^2/0.001	KSEEEVAARR	2	100443_KSEEEVAARR_2	1/P02788	2	y	-1	light
1/P02788	587.812	603.262	-38	1537248_KSEEEVAARR_2	-1	78.8	100443_KSEEEVAARR_2	0	KSEEEVAARR	b5/-0.003	KSEEEVAARR	2	100443_KSEEEVAARR_2	1/P02788	1	b	-1	light
1/P02788	587.812	572.363	-38	1537247_KSEEEVAARR_2	-1	79.7	100443_KSEEEVAARR_2	0	KSEEEVAARR	y5/0.004	KSEEEVAARR	2	100443_KSEEEVAARR_2	1/P02788	1	y	-1	light
1/P42785	720.716	625.346	136.8	97295_b5_1_HLNFLTSEQALADFAELIK_3	-1	3976.8	10047_HLNFLTSEQALADFAELIK_3	0	HLNFLTSEQALADFAELIK	b5/-0.013,y17-36^3/0.005	HLNFLTSEQALADFAELIK	3	10047_HLNFLTSEQALADFAELIK_3	1/P42785	1	b	5	light
1/P42785	720.716	906.493	136.8	97301_y8_1_HLNFLTSEQALADFAELIK_3	-1	8136.1	10047_HLNFLTSEQALADFAELIK_3	0	HLNFLTSEQALADFAELIK	y8/0.014	HLNFLTSEQALADFAELIK	3	10047_HLNFLTSEQALADFAELIK_3	1/P42785	1	y	8	light
1/P42785	720.716	1141.56	136.8	97303_b10_1_HLNFLTSEQALADFAELIK_3	-1	4833.2	10047_HLNFLTSEQALADFAELIK_3	0	HLNFLTSEQALADFAELIK	b10/0.011	HLNFLTSEQALADFAELIK	3	10047_HLNFLTSEQALADFAELIK_3	1/P42785	1	b	10	light
1/P42785	720.716	512.262	136.8	97292_b4_1_HLNFLTSEQALADFAELIK_3	-1	8242.8	10047_HLNFLTSEQALADFAELIK_3	0	HLNFLTSEQALADFAELIK	b4/0.002	HLNFLTSEQALADFAELIK	3	10047_HLNFLTSEQALADFAELIK_3	1/P42785	1	b	4	light
1/P42785	720.716	835.456	136.8	97300_y7_1_HLNFLTSEQALADFAELIK_3	-1	4503	10047_HLNFLTSEQALADFAELIK_3	0	HLNFLTSEQALADFAELIK	y7/-0.010	HLNFLTSEQALADFAELIK	3	10047_HLNFLTSEQALADFAELIK_3	1/P42785	1	y	7	light
1/P42785	720.716	1019.58	136.8	97302_y9_1_HLNFLTSEQALADFAELIK_3	-1	3794.3	10047_HLNFLTSEQALADFAELIK_3	0	HLNFLTSEQALADFAELIK	y9/0.020	HLNFLTSEQALADFAELIK	3	10047_HLNFLTSEQALADFAELIK_3	1/P42785	1	y	9	light
1/P00734	553.296	489.249	-41.6	1538467_KSLEDKTER_2	-1	218	100517_KSLEDKTER_2	0	KSLEDKTER	y8^2/0.002	KSLEDKTER	2	100517_KSLEDKTER_2	1/P00734	2	y	-1	light
1/P00734	553.296	890.458	-41.6	1538473_KSLEDKTER_2	-1	368.6	100517_KSLEDKTER_2	0	KSLEDKTER	y7/-0.001	KSLEDKTER	2	100517_KSLEDKTER_2	1/P00734	1	y	-1	light
1/P00734	553.296	533.304	-41.6	1538468_KSLEDKTER_2	-1	754.5	100517_KSLEDKTER_2	0	KSLEDKTER	y4/-0.004	KSLEDKTER	2	100517_KSLEDKTER_2	1/P00734	1	y	-1	light
1/P00734	553.296	777.374	-41.6	1538472_KSLEDKTER_2	-1	550.3	100517_KSLEDKTER_2	0	KSLEDKTER	y6/-0.001	KSLEDKTER	2	100517_KSLEDKTER_2	1/P00734	1	y	-1	light
1/P00734	553.296	977.49	-41.6	1538474_KSLEDKTER_2	-1	991.5	100517_KSLEDKTER_2	0	KSLEDKTER	y8/0.016	KSLEDKTER	2	100517_KSLEDKTER_2	1/P00734	1	y	-1	light
1/P00734	553.296	648.331	-41.6	1538470_KSLEDKTER_2	-1	275.1	100517_KSLEDKTER_2	0	KSLEDKTER	y5/0.008	KSLEDKTER	2	100517_KSLEDKTER_2	1/P00734	1	y	-1	light
1/P00734	887.462	1204.64	53.9	1539277_KSPQELLC(UniMod:4)GASLISDR_2	-1	1666.3	100568_KSPQELLC(UniMod:4)GASLISDR_2	0	KSPQELLCGASLISDR	y11/-0.006	KSPQELLC(UniMod:4)GASLISDR	2	100568_KSPQELLC(UniMod:4)GASLISDR_2	1/P00734	1	y	-1	light
1/P00734	887.462	1091.55	53.9	1539275_KSPQELLC(UniMod:4)GASLISDR_2	-1	3226.7	100568_KSPQELLC(UniMod:4)GASLISDR_2	0	KSPQELLCGASLISDR	y10/-0.006	KSPQELLC(UniMod:4)GASLISDR	2	100568_KSPQELLC(UniMod:4)GASLISDR_2	1/P00734	1	y	-1	light
1/P00734	887.462	1333.68	53.9	1539280_KSPQELLC(UniMod:4)GASLISDR_2	-1	2066.6	100568_KSPQELLC(UniMod:4)GASLISDR_2	0	KSPQELLCGASLISDR	y12/0.003	KSPQELLC(UniMod:4)GASLISDR	2	100568_KSPQELLC(UniMod:4)GASLISDR_2	1/P00734	1	y	-1	light
1/P00734	887.462	978.467	53.9	1539273_KSPQELLC(UniMod:4)GASLISDR_2	-1	3304.4	100568_KSPQELLC(UniMod:4)GASLISDR_2	0	KSPQELLCGASLISDR	y9/-0.003,b9-35/-0.007	KSPQELLC(UniMod:4)GASLISDR	2	100568_KSPQELLC(UniMod:4)GASLISDR_2	1/P00734	1	y	-1	light
1/P00734	887.462	818.437	53.9	1539268_KSPQELLC(UniMod:4)GASLISDR_2	-1	1944.1	100568_KSPQELLC(UniMod:4)GASLISDR_2	0	KSPQELLCGASLISDR	y8/0.000	KSPQELLC(UniMod:4)GASLISDR	2	100568_KSPQELLC(UniMod:4)GASLISDR_2	1/P00734	1	y	-1	light
1/P00734	887.462	779.898	53.9	1539265_KSPQELLC(UniMod:4)GASLISDR_2	-1	1478.2	100568_KSPQELLC(UniMod:4)GASLISDR_2	0	KSPQELLCGASLISDR	y14^2/0.010	KSPQELLC(UniMod:4)GASLISDR	2	100568_KSPQELLC(UniMod:4)GASLISDR_2	1/P00734	2	y	-1	light
1/P00734	591.977	818.437	54.3	1539308_KSPQELLC(UniMod:4)GASLISDR_3	-1	5014.6	100569_KSPQELLC(UniMod:4)GASLISDR_3	0	KSPQELLCGASLISDR	y8/-0.002	KSPQELLC(UniMod:4)GASLISDR	3	100569_KSPQELLC(UniMod:4)GASLISDR_3	1/P00734	1	y	-1	light
1/P00734	591.977	490.262	54.3	1539290_KSPQELLC(UniMod:4)GASLISDR_3	-1	10000	100569_KSPQELLC(UniMod:4)GASLISDR_3	0	KSPQELLCGASLISDR	y4/0.001	KSPQELLC(UniMod:4)GASLISDR	3	100569_KSPQELLC(UniMod:4)GASLISDR_3	1/P00734	1	y	-1	light
1/P00734	591.977	603.346	54.3	1539297_KSPQELLC(UniMod:4)GASLISDR_3	-1	4149.8	100569_KSPQELLC(UniMod:4)GASLISDR_3	0	KSPQELLCGASLISDR	y5/0.001	KSPQELLC(UniMod:4)GASLISDR	3	100569_KSPQELLC(UniMod:4)GASLISDR_3	1/P00734	1	y	-1	light
1/P00734	591.977	683.372	54.3	1539300_KSPQELLC(UniMod:4)GASLISDR_3	-1	3086.2	100569_KSPQELLC(UniMod:4)GASLISDR_3	0	KSPQELLCGASLISDR	b6/-0.001	KSPQELLC(UniMod:4)GASLISDR	3	100569_KSPQELLC(UniMod:4)GASLISDR_3	1/P00734	1	b	-1	light
1/P00734	591.977	690.378	54.3	1539301_KSPQELLC(UniMod:4)GASLISDR_3	-1	7448.1	100569_KSPQELLC(UniMod:4)GASLISDR_3	0	KSPQELLCGASLISDR	y6/-0.002,b13-18^2/0.005	KSPQELLC(UniMod:4)GASLISDR	3	100569_KSPQELLC(UniMod:4)GASLISDR_3	1/P00734	1	y	-1	light
1/P00734	591.977	377.178	54.3	1539285_KSPQELLC(UniMod:4)GASLISDR_3	-1	5369.1	100569_KSPQELLC(UniMod:4)GASLISDR_3	0	KSPQELLCGASLISDR	y3/0.001	KSPQELLC(UniMod:4)GASLISDR	3	100569_KSPQELLC(UniMod:4)GASLISDR_3	1/P00734	1	y	-1	light
1/P00734	982.458	937.456	82.7	96678_y7_1_HQDFNSAVQLVENFC(UniMod:4)R_2	-1	2105.3	10057_HQDFNSAVQLVENFC(UniMod:4)R_2	0	HQDFNSAVQLVENFCR	y7/-0.010	HQDFNSAVQLVENFC(UniMod:4)R	2	10057_HQDFNSAVQLVENFC(UniMod:4)R_2	1/P00734	1	y	7	light
1/P00734	982.458	1322.65	82.7	96679_y11_1_HQDFNSAVQLVENFC(UniMod:4)R_2	-1	1578.9	10057_HQDFNSAVQLVENFC(UniMod:4)R_2	0	HQDFNSAVQLVENFCR	y11/0.020	HQDFNSAVQLVENFC(UniMod:4)R	2	10057_HQDFNSAVQLVENFC(UniMod:4)R_2	1/P00734	1	y	11	light
1/P00734	982.458	596.261	82.7	96676_y4_1_HQDFNSAVQLVENFC(UniMod:4)R_2	-1	2631.6	10057_HQDFNSAVQLVENFC(UniMod:4)R_2	0	HQDFNSAVQLVENFCR	y4/0.006,b5-46/0.009	HQDFNSAVQLVENFC(UniMod:4)R	2	10057_HQDFNSAVQLVENFC(UniMod:4)R_2	1/P00734	1	y	4	light
1/P00734	982.458	381.152	82.7	96675_b3_1_HQDFNSAVQLVENFC(UniMod:4)R_2	-1	2105.3	10057_HQDFNSAVQLVENFC(UniMod:4)R_2	0	HQDFNSAVQLVENFCR	b3/0.016	HQDFNSAVQLVENFC(UniMod:4)R	2	10057_HQDFNSAVQLVENFC(UniMod:4)R_2	1/P00734	1	b	3	light
1/P00734	982.458	1826.85	82.7	96680_y15_1_HQDFNSAVQLVENFC(UniMod:4)R_2	-1	1578.9	10057_HQDFNSAVQLVENFC(UniMod:4)R_2	0	HQDFNSAVQLVENFCR	y15/-0.017	HQDFNSAVQLVENFC(UniMod:4)R	2	10057_HQDFNSAVQLVENFC(UniMod:4)R_2	1/P00734	1	y	15	light
1/P00734	982.458	824.372	82.7	96677_y6_1_HQDFNSAVQLVENFC(UniMod:4)R_2	-1	1578.9	10057_HQDFNSAVQLVENFC(UniMod:4)R_2	0	HQDFNSAVQLVENFCR	y6/-0.012	HQDFNSAVQLVENFC(UniMod:4)R	2	10057_HQDFNSAVQLVENFC(UniMod:4)R_2	1/P00734	1	y	6	light
1/P00734	444.235	570.288	55.6	1539327_KSPQELLC(UniMod:4)GASLISDR_4	-1	1897.4	100570_KSPQELLC(UniMod:4)GASLISDR_4	0	KSPQELLCGASLISDR	b5/0.010	KSPQELLC(UniMod:4)GASLISDR	4	100570_KSPQELLC(UniMod:4)GASLISDR_4	1/P00734	1	b	-1	light
1/P00734	444.235	683.372	55.6	1539330_KSPQELLC(UniMod:4)GASLISDR_4	-1	1757.2	100570_KSPQELLC(UniMod:4)GASLISDR_4	0	KSPQELLCGASLISDR	b6/0.013	KSPQELLC(UniMod:4)GASLISDR	4	100570_KSPQELLC(UniMod:4)GASLISDR_4	1/P00734	1	b	-1	light
1/P00734	444.235	398.732	55.6	1539318_KSPQELLC(UniMod:4)GASLISDR_4	-1	1271.3	100570_KSPQELLC(UniMod:4)GASLISDR_4	0	KSPQELLCGASLISDR	b7^2/0.004	KSPQELLC(UniMod:4)GASLISDR	4	100570_KSPQELLC(UniMod:4)GASLISDR_4	1/P00734	2	b	-1	light
1/P00734	444.235	603.346	55.6	1539329_KSPQELLC(UniMod:4)GASLISDR_4	-1	1363.5	100570_KSPQELLC(UniMod:4)GASLISDR_4	0	KSPQELLCGASLISDR	y5/-0.007	KSPQELLC(UniMod:4)GASLISDR	4	100570_KSPQELLC(UniMod:4)GASLISDR_4	1/P00734	1	y	-1	light
1/P00734	444.235	377.178	55.6	1539317_KSPQELLC(UniMod:4)GASLISDR_4	-1	7169	100570_KSPQELLC(UniMod:4)GASLISDR_4	0	KSPQELLCGASLISDR	y3/0.002	KSPQELLC(UniMod:4)GASLISDR	4	100570_KSPQELLC(UniMod:4)GASLISDR_4	1/P00734	1	y	-1	light
1/P00734	444.235	490.262	55.6	1539322_KSPQELLC(UniMod:4)GASLISDR_4	-1	5196.8	100570_KSPQELLC(UniMod:4)GASLISDR_4	0	KSPQELLCGASLISDR	y4/0.001	KSPQELLC(UniMod:4)GASLISDR	4	100570_KSPQELLC(UniMod:4)GASLISDR_4	1/P00734	1	y	-1	light
1/P00734	655.307	824.372	82.6	96690_y6_1_HQDFNSAVQLVENFC(UniMod:4)R_3	-1	10000	10058_HQDFNSAVQLVENFC(UniMod:4)R_3	0	HQDFNSAVQLVENFCR	y6/-0.000	HQDFNSAVQLVENFC(UniMod:4)R	3	10058_HQDFNSAVQLVENFC(UniMod:4)R_3	1/P00734	1	y	6	light
1/P00734	655.307	937.456	82.6	96692_y7_1_HQDFNSAVQLVENFC(UniMod:4)R_3	-1	5587.3	10058_HQDFNSAVQLVENFC(UniMod:4)R_3	0	HQDFNSAVQLVENFCR	y7/0.000	HQDFNSAVQLVENFC(UniMod:4)R	3	10058_HQDFNSAVQLVENFC(UniMod:4)R_3	1/P00734	1	y	7	light
1/P00734	655.307	725.304	82.6	96687_y5_1_HQDFNSAVQLVENFC(UniMod:4)R_3	-1	9880.4	10058_HQDFNSAVQLVENFC(UniMod:4)R_3	0	HQDFNSAVQLVENFCR	y5/0.003	HQDFNSAVQLVENFC(UniMod:4)R	3	10058_HQDFNSAVQLVENFC(UniMod:4)R_3	1/P00734	1	y	5	light
1/P00734	655.307	899.401	82.6	96691_b8_1_HQDFNSAVQLVENFC(UniMod:4)R_3	-1	4162.2	10058_HQDFNSAVQLVENFC(UniMod:4)R_3	0	HQDFNSAVQLVENFCR	b8/0.001	HQDFNSAVQLVENFC(UniMod:4)R	3	10058_HQDFNSAVQLVENFC(UniMod:4)R_3	1/P00734	1	b	8	light
1/P00734	655.307	800.332	82.6	96689_b7_1_HQDFNSAVQLVENFC(UniMod:4)R_3	-1	8613.3	10058_HQDFNSAVQLVENFC(UniMod:4)R_3	0	HQDFNSAVQLVENFCR	b7/0.000	HQDFNSAVQLVENFC(UniMod:4)R	3	10058_HQDFNSAVQLVENFC(UniMod:4)R_3	1/P00734	1	b	7	light
1/P00734	655.307	596.261	82.6	96685_y4_1_HQDFNSAVQLVENFC(UniMod:4)R_3	-1	5134.8	10058_HQDFNSAVQLVENFC(UniMod:4)R_3	0	HQDFNSAVQLVENFCR	y4/0.002,b5-46/0.005	HQDFNSAVQLVENFC(UniMod:4)R	3	10058_HQDFNSAVQLVENFC(UniMod:4)R_3	1/P00734	1	y	4	light
1/Q9HAT2	625.312	1121.52	6.4	1539668_KSSDDGFPQIR_2	-1	1370.1	100592_KSSDDGFPQIR_2	0	KSSDDGFPQIR	y10/-0.006	KSSDDGFPQIR	2	100592_KSSDDGFPQIR_2	1/Q9HAT2	1	y	-1	light
1/Q9HAT2	625.312	832.431	6.4	1539663_KSSDDGFPQIR_2	-1	450.2	100592_KSSDDGFPQIR_2	0	KSSDDGFPQIR	y7/0.004	KSSDDGFPQIR	2	100592_KSSDDGFPQIR_2	1/Q9HAT2	1	y	-1	light
1/Q9HAT2	625.312	947.458	6.4	1539664_KSSDDGFPQIR_2	-1	385.5	100592_KSSDDGFPQIR_2	0	KSSDDGFPQIR	y8/0.001	KSSDDGFPQIR	2	100592_KSSDDGFPQIR_2	1/Q9HAT2	1	y	-1	light
1/Q9HAT2	625.312	1034.49	6.4	1539666_KSSDDGFPQIR_2	-1	461.7	100592_KSSDDGFPQIR_2	0	KSSDDGFPQIR	y9/0.013	KSSDDGFPQIR	2	100592_KSSDDGFPQIR_2	1/Q9HAT2	1	y	-1	light
1/Q9HAT2	625.312	717.404	6.4	1539662_KSSDDGFPQIR_2	-1	846.5	100592_KSSDDGFPQIR_2	0	KSSDDGFPQIR	y6/-0.012	KSSDDGFPQIR	2	100592_KSSDDGFPQIR_2	1/Q9HAT2	1	y	-1	light
1/Q9HAT2	625.312	513.314	6.4	1539659_KSSDDGFPQIR_2	-1	522.9	100592_KSSDDGFPQIR_2	0	KSSDDGFPQIR	y4/-0.004	KSSDDGFPQIR	2	100592_KSSDDGFPQIR_2	1/Q9HAT2	1	y	-1	light
1/P47712	691.114	652.389	149.9	1539796_KSSGQPVTFTDIFGMLIGETLIHNR_4	-1	6101.3	100599_KSSGQPVTFTDIFGMLIGETLIHNR_4	0	KSSGQPVTFTDIFGMLIGETLIHNR	y5/0.009	KSSGQPVTFTDIFGMLIGETLIHNR	4	100599_KSSGQPVTFTDIFGMLIGETLIHNR_4	1/P47712	1	y	-1	light
1/P47712	691.114	750.903	149.9	1539799_KSSGQPVTFTDIFGMLIGETLIHNR_4	-1	3896.5	100599_KSSGQPVTFTDIFGMLIGETLIHNR_4	0	KSSGQPVTFTDIFGMLIGETLIHNR	y13^2/-0.001	KSSGQPVTFTDIFGMLIGETLIHNR	4	100599_KSSGQPVTFTDIFGMLIGETLIHNR_4	1/P47712	2	y	-1	light
1/P47712	691.114	488.246	149.9	1539791_KSSGQPVTFTDIFGMLIGETLIHNR_4	-1	8997.5	100599_KSSGQPVTFTDIFGMLIGETLIHNR_4	0	KSSGQPVTFTDIFGMLIGETLIHNR	b5/-0.007	KSSGQPVTFTDIFGMLIGETLIHNR	4	100599_KSSGQPVTFTDIFGMLIGETLIHNR_4	1/P47712	1	b	-1	light
1/P47712	691.114	939.501	149.9	1539805_KSSGQPVTFTDIFGMLIGETLIHNR_4	-1	5364.4	100599_KSSGQPVTFTDIFGMLIGETLIHNR_4	0	KSSGQPVTFTDIFGMLIGETLIHNR	y8/0.001	KSSGQPVTFTDIFGMLIGETLIHNR	4	100599_KSSGQPVTFTDIFGMLIGETLIHNR_4	1/P47712	1	y	-1	light
1/P47712	691.114	677.369	149.9	1539797_KSSGQPVTFTDIFGMLIGETLIHNR_4	-1	3607.3	100599_KSSGQPVTFTDIFGMLIGETLIHNR_4	0	KSSGQPVTFTDIFGMLIGETLIHNR	y12^2/0.008	KSSGQPVTFTDIFGMLIGETLIHNR	4	100599_KSSGQPVTFTDIFGMLIGETLIHNR_4	1/P47712	2	y	-1	light
1/P47712	691.114	426.221	149.9	1539790_KSSGQPVTFTDIFGMLIGETLIHNR_4	-1	3352.9	100599_KSSGQPVTFTDIFGMLIGETLIHNR_4	0	KSSGQPVTFTDIFGMLIGETLIHNR	y3/0.001	KSSGQPVTFTDIFGMLIGETLIHNR	4	100599_KSSGQPVTFTDIFGMLIGETLIHNR_4	1/P47712	1	y	-1	light
1/Q8NFV4	687.027	645.339	99.6	1403656_y5_1_ILAFPQRQESYLGPTLFLLGGNSQFVHPSHHPEIMR_6	-1	4191.2	100614_ILAFPQRQESYLGPTLFLLGGNSQFVHPSHHPEIMR_6	0	ILAFPQRQESYLGPTLFLLGGNSQFVHPSHHPEIMR	y5/-0.009,y23-36^4/-0.004	ILAFPQRQESYLGPTLFLLGGNSQFVHPSHHPEIMR	6	100614_ILAFPQRQESYLGPTLFLLGGNSQFVHPSHHPEIMR_6	1/Q8NFV4	1	y	5	light
1/Q8NFV4	687.027	1103.54	99.6	1403666_y9_1_ILAFPQRQESYLGPTLFLLGGNSQFVHPSHHPEIMR_6	-1	2221.8	100614_ILAFPQRQESYLGPTLFLLGGNSQFVHPSHHPEIMR_6	0	ILAFPQRQESYLGPTLFLLGGNSQFVHPSHHPEIMR	y9/-0.011	ILAFPQRQESYLGPTLFLLGGNSQFVHPSHHPEIMR	6	100614_ILAFPQRQESYLGPTLFLLGGNSQFVHPSHHPEIMR_6	1/Q8NFV4	1	y	9	light
1/Q8NFV4	687.027	1333.69	99.6	1403668_b11_1_ILAFPQRQESYLGPTLFLLGGNSQFVHPSHHPEIMR_6	-1	2327.6	100614_ILAFPQRQESYLGPTLFLLGGNSQFVHPSHHPEIMR_6	0	ILAFPQRQESYLGPTLFLLGGNSQFVHPSHHPEIMR	b11/-0.002	ILAFPQRQESYLGPTLFLLGGNSQFVHPSHHPEIMR	6	100614_ILAFPQRQESYLGPTLFLLGGNSQFVHPSHHPEIMR_6	1/Q8NFV4	1	b	11	light
1/Q8NFV4	687.027	782.398	99.6	1403659_y6_1_ILAFPQRQESYLGPTLFLLGGNSQFVHPSHHPEIMR_6	-1	2827.8	100614_ILAFPQRQESYLGPTLFLLGGNSQFVHPSHHPEIMR_6	0	ILAFPQRQESYLGPTLFLLGGNSQFVHPSHHPEIMR	y6/-0.002,b35-35^5/-0.005	ILAFPQRQESYLGPTLFLLGGNSQFVHPSHHPEIMR	6	100614_ILAFPQRQESYLGPTLFLLGGNSQFVHPSHHPEIMR_6	1/Q8NFV4	1	y	6	light
1/Q8NFV4	687.027	552.274	99.6	1403654_y9_2_ILAFPQRQESYLGPTLFLLGGNSQFVHPSHHPEIMR_6	-1	2123.6	100614_ILAFPQRQESYLGPTLFLLGGNSQFVHPSHHPEIMR_6	0	ILAFPQRQESYLGPTLFLLGGNSQFVHPSHHPEIMR	y9^2/-0.010	ILAFPQRQESYLGPTLFLLGGNSQFVHPSHHPEIMR	6	100614_ILAFPQRQESYLGPTLFLLGGNSQFVHPSHHPEIMR_6	1/Q8NFV4	2	y	9	light
1/Q8NFV4	687.027	936.95	99.6	1403664_y16_2_ILAFPQRQESYLGPTLFLLGGNSQFVHPSHHPEIMR_6	-1	2048.9	100614_ILAFPQRQESYLGPTLFLLGGNSQFVHPSHHPEIMR_6	0	ILAFPQRQESYLGPTLFLLGGNSQFVHPSHHPEIMR	y16^2/0.013	ILAFPQRQESYLGPTLFLLGGNSQFVHPSHHPEIMR	6	100614_ILAFPQRQESYLGPTLFLLGGNSQFVHPSHHPEIMR_6	1/Q8NFV4	2	y	16	light
1/Q8NFV4	689.692	1446.77	96.2	1403687_b12_1_ILAFPQRQESYLGPTLFLLGGNSQFVHPSHHPEIM(UniMod:35)R_6	-1	1425.1	100615_ILAFPQRQESYLGPTLFLLGGNSQFVHPSHHPEIM(UniMod:35)R_6	0	ILAFPQRQESYLGPTLFLLGGNSQFVHPSHHPEIMR	b12/-0.011	ILAFPQRQESYLGPTLFLLGGNSQFVHPSHHPEIM(UniMod:35)R	6	100615_ILAFPQRQESYLGPTLFLLGGNSQFVHPSHHPEIM(UniMod:35)R_6	1/Q8NFV4	1	b	12	light
1/Q8NFV4	689.692	1333.69	96.2	1403686_b11_1_ILAFPQRQESYLGPTLFLLGGNSQFVHPSHHPEIM(UniMod:35)R_6	-1	1521.7	100615_ILAFPQRQESYLGPTLFLLGGNSQFVHPSHHPEIM(UniMod:35)R_6	0	ILAFPQRQESYLGPTLFLLGGNSQFVHPSHHPEIMR	b11/-0.007,m2:12/-0.007	ILAFPQRQESYLGPTLFLLGGNSQFVHPSHHPEIM(UniMod:35)R	6	100615_ILAFPQRQESYLGPTLFLLGGNSQFVHPSHHPEIM(UniMod:35)R_6	1/Q8NFV4	1	b	11	light
1/Q8NFV4	689.692	560.272	96.2	1403671_y9_2_ILAFPQRQESYLGPTLFLLGGNSQFVHPSHHPEIM(UniMod:35)R_6	-1	1570	100615_ILAFPQRQESYLGPTLFLLGGNSQFVHPSHHPEIM(UniMod:35)R_6	0	ILAFPQRQESYLGPTLFLLGGNSQFVHPSHHPEIMR	y9^2/0.003	ILAFPQRQESYLGPTLFLLGGNSQFVHPSHHPEIM(UniMod:35)R	6	100615_ILAFPQRQESYLGPTLFLLGGNSQFVHPSHHPEIM(UniMod:35)R_6	1/Q8NFV4	2	y	9	light
1/Q8NFV4	689.692	981.528	96.2	1403682_b17_2_ILAFPQRQESYLGPTLFLLGGNSQFVHPSHHPEIM(UniMod:35)R_6	-1	2053.1	100615_ILAFPQRQESYLGPTLFLLGGNSQFVHPSHHPEIM(UniMod:35)R_6	0	ILAFPQRQESYLGPTLFLLGGNSQFVHPSHHPEIMR	b17^2/0.004,m2:18^2/0.004	ILAFPQRQESYLGPTLFLLGGNSQFVHPSHHPEIM(UniMod:35)R	6	100615_ILAFPQRQESYLGPTLFLLGGNSQFVHPSHHPEIM(UniMod:35)R_6	1/Q8NFV4	2	b	17	light
1/Q8NFV4	689.692	751.87	96.2	1403677_y12_2_ILAFPQRQESYLGPTLFLLGGNSQFVHPSHHPEIM(UniMod:35)R_6	-1	2000.9	100615_ILAFPQRQESYLGPTLFLLGGNSQFVHPSHHPEIM(UniMod:35)R_6	0	ILAFPQRQESYLGPTLFLLGGNSQFVHPSHHPEIMR	y12^2/-0.002,y27-46^4/-0.019	ILAFPQRQESYLGPTLFLLGGNSQFVHPSHHPEIM(UniMod:35)R	6	100615_ILAFPQRQESYLGPTLFLLGGNSQFVHPSHHPEIM(UniMod:35)R_6	1/Q8NFV4	2	y	12	light
1/Q8NFV4	689.692	661.334	96.2	1403672_y5_1_ILAFPQRQESYLGPTLFLLGGNSQFVHPSHHPEIM(UniMod:35)R_6	-1	2533.8	100615_ILAFPQRQESYLGPTLFLLGGNSQFVHPSHHPEIM(UniMod:35)R_6	0	ILAFPQRQESYLGPTLFLLGGNSQFVHPSHHPEIMR	[y5/-0.017]	ILAFPQRQESYLGPTLFLLGGNSQFVHPSHHPEIM(UniMod:35)R	6	100615_ILAFPQRQESYLGPTLFLLGGNSQFVHPSHHPEIM(UniMod:35)R_6	1/Q8NFV4	1	y	5	light
1/Q8TF72	555.289	498.747	-29	1403870_y9_2_ILAGQHEDAR_2	-1	708.4	100627_ILAGQHEDAR_2	0	ILAGQHEDAR	y9^2/0.004	ILAGQHEDAR	2	100627_ILAGQHEDAR_2	1/Q8TF72	2	y	9	light
1/Q8TF72	555.289	812.365	-29	1403873_y7_1_ILAGQHEDAR_2	-1	1009.2	100627_ILAGQHEDAR_2	0	ILAGQHEDAR	y7/-0.001	ILAGQHEDAR	2	100627_ILAGQHEDAR_2	1/Q8TF72	1	y	7	light
1/Q8TF72	555.289	442.204	-29	1403868_y8_2_ILAGQHEDAR_2	-1	869.1	100627_ILAGQHEDAR_2	0	ILAGQHEDAR	y8^2/0.002	ILAGQHEDAR	2	100627_ILAGQHEDAR_2	1/Q8TF72	2	y	8	light
1/Q8TF72	555.289	627.285	-29	1403871_y5_1_ILAGQHEDAR_2	-1	955.5	100627_ILAGQHEDAR_2	0	ILAGQHEDAR	y5/0.004	ILAGQHEDAR	2	100627_ILAGQHEDAR_2	1/Q8TF72	1	y	5	light
1/Q8TF72	555.289	864.421	-29	1403874_b8_1_ILAGQHEDAR_2	-1	916.8	100627_ILAGQHEDAR_2	0	ILAGQHEDAR	b8/0.003	ILAGQHEDAR	2	100627_ILAGQHEDAR_2	1/Q8TF72	1	b	8	light
1/Q8TF72	555.289	883.402	-29	1403876_y8_1_ILAGQHEDAR_2	-1	1901.1	100627_ILAGQHEDAR_2	0	ILAGQHEDAR	y8/0.002	ILAGQHEDAR	2	100627_ILAGQHEDAR_2	1/Q8TF72	1	y	8	light
1/Q96AD5	626.377	534.316	87.1	153983_ALFPPEPLVLR_2	-1	3005.3	10071_ALFPPEPLVLR_2	0	ALFPPEPLVLR	y9^2/0.002	ALFPPEPLVLR	2	10071_ALFPPEPLVLR_2	1/Q96AD5	2	y	-1	light
1/Q96AD5	626.377	823.504	87.1	153986_ALFPPEPLVLR_2	-1	7314	10071_ALFPPEPLVLR_2	0	ALFPPEPLVLR	y7/-0.003	ALFPPEPLVLR	2	10071_ALFPPEPLVLR_2	1/Q96AD5	1	y	-1	light
1/Q96AD5	626.377	920.556	87.1	153988_ALFPPEPLVLR_2	-1	8755.5	10071_ALFPPEPLVLR_2	0	ALFPPEPLVLR	y8/-0.009,b9-44/-0.013	ALFPPEPLVLR	2	10071_ALFPPEPLVLR_2	1/Q96AD5	1	y	-1	light
1/Q96AD5	626.377	460.782	87.1	153980_ALFPPEPLVLR_2	-1	10000	10071_ALFPPEPLVLR_2	0	ALFPPEPLVLR	y8^2/-0.001,b9-44^2/-0.003	ALFPPEPLVLR	2	10071_ALFPPEPLVLR_2	1/Q96AD5	2	y	-1	light
1/Q96AD5	626.377	597.408	87.1	153984_ALFPPEPLVLR_2	-1	7089.5	10071_ALFPPEPLVLR_2	0	ALFPPEPLVLR	y5/-0.004	ALFPPEPLVLR	2	10071_ALFPPEPLVLR_2	1/Q96AD5	1	y	-1	light
1/Q96AD5	626.377	412.255	87.1	153979_ALFPPEPLVLR_2	-1	1548.6	10071_ALFPPEPLVLR_2	0	ALFPPEPLVLR	y7^2/0.008	ALFPPEPLVLR	2	10071_ALFPPEPLVLR_2	1/Q96AD5	2	y	-1	light
1/P36776	654.344	554.33	56.4	1405633_y6_1_ILC(UniMod:4)FYGPPGVGK_2	-1	8597.5	100756_ILC(UniMod:4)FYGPPGVGK_2	0	ILCFYGPPGVGK	y6/-0.003	ILC(UniMod:4)FYGPPGVGK	2	100756_ILC(UniMod:4)FYGPPGVGK_2	1/P36776	1	y	6	light
1/P36776	654.344	387.206	56.4	1405629_b3_1_ILC(UniMod:4)FYGPPGVGK_2	-1	4207.5	100756_ILC(UniMod:4)FYGPPGVGK_2	0	ILCFYGPPGVGK	b3/-0.001	ILC(UniMod:4)FYGPPGVGK	2	100756_ILC(UniMod:4)FYGPPGVGK_2	1/P36776	1	b	3	light
1/P36776	654.344	611.351	56.4	1405635_y7_1_ILC(UniMod:4)FYGPPGVGK_2	-1	9550.8	100756_ILC(UniMod:4)FYGPPGVGK_2	0	ILCFYGPPGVGK	y7/-0.002	ILC(UniMod:4)FYGPPGVGK	2	100756_ILC(UniMod:4)FYGPPGVGK_2	1/P36776	1	y	7	light
1/P36776	654.344	1081.51	56.4	1405643_y10_1_ILC(UniMod:4)FYGPPGVGK_2	-1	5768.4	100756_ILC(UniMod:4)FYGPPGVGK_2	0	ILCFYGPPGVGK	y10/-0.003	ILC(UniMod:4)FYGPPGVGK	2	100756_ILC(UniMod:4)FYGPPGVGK_2	1/P36776	1	y	10	light
1/P36776	654.344	774.414	56.4	1405639_y8_1_ILC(UniMod:4)FYGPPGVGK_2	-1	6650.1	100756_ILC(UniMod:4)FYGPPGVGK_2	0	ILCFYGPPGVGK	y8/-0.001	ILC(UniMod:4)FYGPPGVGK	2	100756_ILC(UniMod:4)FYGPPGVGK_2	1/P36776	1	y	8	light
1/P36776	654.344	921.483	56.4	1405641_y9_1_ILC(UniMod:4)FYGPPGVGK_2	-1	5153.2	100756_ILC(UniMod:4)FYGPPGVGK_2	0	ILCFYGPPGVGK	y9/-0.002	ILC(UniMod:4)FYGPPGVGK	2	100756_ILC(UniMod:4)FYGPPGVGK_2	1/P36776	1	y	9	light
1/Q99685	554.807	518.297	79.9	6538_b5_1_GAYLLMELAK_2	-1	1561.4	1008_GAYLLMELAK_2	0	GAYLLMELAK	b5/0.008	GAYLLMELAK	2	1008_GAYLLMELAK_2	1/Q99685	1	b	5	light
1/Q99685	554.807	649.338	79.9	6540_b6_1_GAYLLMELAK_2	-1	504.6	1008_GAYLLMELAK_2	0	GAYLLMELAK	b6/0.017	GAYLLMELAK	2	1008_GAYLLMELAK_2	1/Q99685	1	b	6	light
1/Q99685	554.807	460.277	79.9	6537_y4_1_GAYLLMELAK_2	-1	1554.8	1008_GAYLLMELAK_2	0	GAYLLMELAK	y4/0.008	GAYLLMELAK	2	1008_GAYLLMELAK_2	1/Q99685	1	y	4	light
1/Q99685	554.807	405.213	79.9	6536_b4_1_GAYLLMELAK_2	-1	2626.9	1008_GAYLLMELAK_2	0	GAYLLMELAK	b4/0.002	GAYLLMELAK	2	1008_GAYLLMELAK_2	1/Q99685	1	b	4	light
1/Q99685	554.807	704.401	79.9	6541_y6_1_GAYLLMELAK_2	-1	10000	1008_GAYLLMELAK_2	0	GAYLLMELAK	y6/0.018	GAYLLMELAK	2	1008_GAYLLMELAK_2	1/Q99685	1	y	6	light
1/Q99685	554.807	591.317	79.9	6539_y5_1_GAYLLMELAK_2	-1	5488.1	1008_GAYLLMELAK_2	0	GAYLLMELAK	y5/0.012	GAYLLMELAK	2	1008_GAYLLMELAK_2	1/Q99685	1	y	5	light
1/P48147	626.353	1114.64	51	97609_y11_1_HMGGILAVANIR_2	-1	2303	10080_HMGGILAVANIR_2	0	HMGGILAVANIR	y11/-0.020	HMGGILAVANIR	2	10080_HMGGILAVANIR_2	1/P48147	1	y	11	light
1/P48147	626.353	756.473	51	97607_y7_1_HMGGILAVANIR_2	-1	941.7	10080_HMGGILAVANIR_2	0	HMGGILAVANIR	y7/0.013	HMGGILAVANIR	2	10080_HMGGILAVANIR_2	1/P48147	1	y	7	light
1/P48147	626.353	473.283	51	97602_y4_1_HMGGILAVANIR_2	-1	729.5	10080_HMGGILAVANIR_2	0	HMGGILAVANIR	y4/0.012	HMGGILAVANIR	2	10080_HMGGILAVANIR_2	1/P48147	1	y	4	light
1/P48147	626.353	680.355	51	97606_b7_1_HMGGILAVANIR_2	-1	727.3	10080_HMGGILAVANIR_2	0	HMGGILAVANIR	b7/-0.013	HMGGILAVANIR	2	10080_HMGGILAVANIR_2	1/P48147	1	b	7	light
1/P48147	626.353	496.234	51	97603_b5_1_HMGGILAVANIR_2	-1	848.5	10080_HMGGILAVANIR_2	0	HMGGILAVANIR	b5/-0.007	HMGGILAVANIR	2	10080_HMGGILAVANIR_2	1/P48147	1	b	5	light
1/P48147	626.353	643.389	51	97605_y6_1_HMGGILAVANIR_2	-1	909.1	10080_HMGGILAVANIR_2	0	HMGGILAVANIR	y6/0.015	HMGGILAVANIR	2	10080_HMGGILAVANIR_2	1/P48147	1	y	6	light
1/P48147	417.905	609.318	50.3	97621_b6_1_HMGGILAVANIR_3	-1	4548.5	10081_HMGGILAVANIR_3	0	HMGGILAVANIR	b6/0.004	HMGGILAVANIR	3	10081_HMGGILAVANIR_3	1/P48147	1	b	6	light
1/P48147	417.905	496.234	50.3	97616_b5_1_HMGGILAVANIR_3	-1	5971.2	10081_HMGGILAVANIR_3	0	HMGGILAVANIR	b5/0.001	HMGGILAVANIR	3	10081_HMGGILAVANIR_3	1/P48147	1	b	5	light
1/P48147	417.905	643.389	50.3	97622_y6_1_HMGGILAVANIR_3	-1	4894.4	10081_HMGGILAVANIR_3	0	HMGGILAVANIR	y6/0.006	HMGGILAVANIR	3	10081_HMGGILAVANIR_3	1/P48147	1	y	6	light
1/P48147	417.905	680.355	50.3	97623_b7_1_HMGGILAVANIR_3	-1	5065	10081_HMGGILAVANIR_3	0	HMGGILAVANIR	b7/0.001	HMGGILAVANIR	3	10081_HMGGILAVANIR_3	1/P48147	1	b	7	light
1/P48147	417.905	572.351	50.3	97618_y5_1_HMGGILAVANIR_3	-1	6171.7	10081_HMGGILAVANIR_3	0	HMGGILAVANIR	y5/0.002	HMGGILAVANIR	3	10081_HMGGILAVANIR_3	1/P48147	1	y	5	light
1/P48147	417.905	473.283	50.3	97615_y4_1_HMGGILAVANIR_3	-1	10000	10081_HMGGILAVANIR_3	0	HMGGILAVANIR	y4/0.000	HMGGILAVANIR	3	10081_HMGGILAVANIR_3	1/P48147	1	y	4	light
1/P48147	423.236	625.313	38.5	97637_b6_1_HM(UniMod:35)GGILAVANIR_3	-1	3393	10082_HM(UniMod:35)GGILAVANIR_3	0	HMGGILAVANIR	b6/-0.008	HM(UniMod:35)GGILAVANIR	3	10082_HM(UniMod:35)GGILAVANIR_3	1/P48147	1	b	6	light
1/P48147	423.236	572.351	38.5	97636_y5_1_HM(UniMod:35)GGILAVANIR_3	-1	4761	10082_HM(UniMod:35)GGILAVANIR_3	0	HMGGILAVANIR	y5/0.001	HM(UniMod:35)GGILAVANIR	3	10082_HM(UniMod:35)GGILAVANIR_3	1/P48147	1	y	5	light
1/P48147	423.236	473.283	38.5	97631_y4_1_HM(UniMod:35)GGILAVANIR_3	-1	10000	10082_HM(UniMod:35)GGILAVANIR_3	0	HMGGILAVANIR	y4/0.001	HM(UniMod:35)GGILAVANIR	3	10082_HM(UniMod:35)GGILAVANIR_3	1/P48147	1	y	4	light
1/P48147	423.236	512.229	38.5	97633_b5_1_HM(UniMod:35)GGILAVANIR_3	-1	4625.1	10082_HM(UniMod:35)GGILAVANIR_3	0	HMGGILAVANIR	b5/0.003	HM(UniMod:35)GGILAVANIR	3	10082_HM(UniMod:35)GGILAVANIR_3	1/P48147	1	b	5	light
1/P48147	423.236	696.35	38.5	97640_b7_1_HM(UniMod:35)GGILAVANIR_3	-1	3948.4	10082_HM(UniMod:35)GGILAVANIR_3	0	HMGGILAVANIR	b7/-0.009	HM(UniMod:35)GGILAVANIR	3	10082_HM(UniMod:35)GGILAVANIR_3	1/P48147	1	b	7	light
1/P48147	423.236	643.389	38.5	97639_y6_1_HM(UniMod:35)GGILAVANIR_3	-1	3589.2	10082_HM(UniMod:35)GGILAVANIR_3	0	HMGGILAVANIR	y6/-0.004	HM(UniMod:35)GGILAVANIR	3	10082_HM(UniMod:35)GGILAVANIR_3	1/P48147	1	y	6	light
1/P00751	526.269	434.208	14	154230_ALFVSEEEK_2	-1	1428.5	10088_ALFVSEEEK_2	0	ALFVSEEEK	y7^2/0.000	ALFVSEEEK	2	10088_ALFVSEEEK_2	1/P00751	2	y	-1	light
1/P00751	526.269	405.198	14	154228_ALFVSEEEK_2	-1	609.1	10088_ALFVSEEEK_2	0	ALFVSEEEK	y3/-0.000	ALFVSEEEK	2	10088_ALFVSEEEK_2	1/P00751	1	y	-1	light
1/P00751	526.269	720.341	14	154235_ALFVSEEEK_2	-1	4738	10088_ALFVSEEEK_2	0	ALFVSEEEK	y6/-0.002	ALFVSEEEK	2	10088_ALFVSEEEK_2	1/P00751	1	y	-1	light
1/P00751	526.269	431.265	14	154229_ALFVSEEEK_2	-1	672.8	10088_ALFVSEEEK_2	0	ALFVSEEEK	b4/-0.001	ALFVSEEEK	2	10088_ALFVSEEEK_2	1/P00751	1	b	-1	light
1/P00751	526.269	867.409	14	154237_ALFVSEEEK_2	-1	10000	10088_ALFVSEEEK_2	0	ALFVSEEEK	y7/-0.002	ALFVSEEEK	2	10088_ALFVSEEEK_2	1/P00751	1	y	-1	light
1/P00751	526.269	621.273	14	154234_ALFVSEEEK_2	-1	6837	10088_ALFVSEEEK_2	0	ALFVSEEEK	y5/0.000	ALFVSEEEK	2	10088_ALFVSEEEK_2	1/P00751	1	y	-1	light
1/P00751	590.316	662.336	2.5	154247_ALFVSEEEKK_2	-1	395.1	10089_ALFVSEEEKK_2	0	ALFVSEEEKK	y5/0.001	ALFVSEEEKK	2	10089_ALFVSEEEKK_2	1/P00751	1	y	-1	light
1/P00751	590.316	749.368	2.5	154248_ALFVSEEEKK_2	-1	3837.2	10089_ALFVSEEEKK_2	0	ALFVSEEEKK	y6/-0.001	ALFVSEEEKK	2	10089_ALFVSEEEKK_2	1/P00751	1	y	-1	light
1/P00751	590.316	995.504	2.5	154251_ALFVSEEEKK_2	-1	2638.6	10089_ALFVSEEEKK_2	0	ALFVSEEEKK	y8/0.001	ALFVSEEEKK	2	10089_ALFVSEEEKK_2	1/P00751	1	y	-1	light
1/P00751	590.316	533.293	2.5	154245_ALFVSEEEKK_2	-1	385.9	10089_ALFVSEEEKK_2	0	ALFVSEEEKK	y4/0.000	ALFVSEEEKK	2	10089_ALFVSEEEKK_2	1/P00751	1	y	-1	light
1/P00751	590.316	848.436	2.5	154249_ALFVSEEEKK_2	-1	2435.7	10089_ALFVSEEEKK_2	0	ALFVSEEEKK	y7/-0.001	ALFVSEEEKK	2	10089_ALFVSEEEKK_2	1/P00751	1	y	-1	light
1/P00751	590.316	498.256	2.5	154244_ALFVSEEEKK_2	-1	1233.3	10089_ALFVSEEEKK_2	0	ALFVSEEEKK	y8^2/0.001,y4-35/0.001	ALFVSEEEKK	2	10089_ALFVSEEEKK_2	1/P00751	2	y	-1	light
1/Q86VB7	571.575	978.456	-16.1	97721_y9_1_HNC(UniMod:4)DHAEDAGVIC(UniMod:4)SK_3	-1	433.8	10091_HNC(UniMod:4)DHAEDAGVIC(UniMod:4)SK_3	0	HNCDHAEDAGVICSK	y9/0.010	HNC(UniMod:4)DHAEDAGVIC(UniMod:4)SK	3	10091_HNC(UniMod:4)DHAEDAGVIC(UniMod:4)SK_3	1/Q86VB7	1	y	9	light
1/Q86VB7	571.575	394.175	-16.1	97713_y3_1_HNC(UniMod:4)DHAEDAGVIC(UniMod:4)SK_3	-1	856.9	10091_HNC(UniMod:4)DHAEDAGVIC(UniMod:4)SK_3	0	HNCDHAEDAGVICSK	y3/0.001	HNC(UniMod:4)DHAEDAGVIC(UniMod:4)SK	3	10091_HNC(UniMod:4)DHAEDAGVIC(UniMod:4)SK_3	1/Q86VB7	1	y	3	light
1/Q86VB7	571.575	734.387	-16.1	97719_y7_1_HNC(UniMod:4)DHAEDAGVIC(UniMod:4)SK_3	-1	328.3	10091_HNC(UniMod:4)DHAEDAGVIC(UniMod:4)SK_3	0	HNCDHAEDAGVICSK	y7/0.009	HNC(UniMod:4)DHAEDAGVIC(UniMod:4)SK	3	10091_HNC(UniMod:4)DHAEDAGVIC(UniMod:4)SK_3	1/Q86VB7	1	y	7	light
1/Q86VB7	571.575	664.226	-16.1	97718_b5_1_HNC(UniMod:4)DHAEDAGVIC(UniMod:4)SK_3	-1	365.4	10091_HNC(UniMod:4)DHAEDAGVIC(UniMod:4)SK_3	0	HNCDHAEDAGVICSK	b5/-0.017	HNC(UniMod:4)DHAEDAGVIC(UniMod:4)SK	3	10091_HNC(UniMod:4)DHAEDAGVIC(UniMod:4)SK_3	1/Q86VB7	1	b	5	light
1/Q86VB7	571.575	849.413	-16.1	97720_y8_1_HNC(UniMod:4)DHAEDAGVIC(UniMod:4)SK_3	-1	579.2	10091_HNC(UniMod:4)DHAEDAGVIC(UniMod:4)SK_3	0	HNCDHAEDAGVICSK	y8/-0.005	HNC(UniMod:4)DHAEDAGVIC(UniMod:4)SK	3	10091_HNC(UniMod:4)DHAEDAGVIC(UniMod:4)SK_3	1/Q86VB7	1	y	8	light
1/Q86VB7	571.575	527.167	-16.1	97715_b4_1_HNC(UniMod:4)DHAEDAGVIC(UniMod:4)SK_3	-1	804.5	10091_HNC(UniMod:4)DHAEDAGVIC(UniMod:4)SK_3	0	HNCDHAEDAGVICSK	b4/0.004,m2:5/0.004	HNC(UniMod:4)DHAEDAGVIC(UniMod:4)SK	3	10091_HNC(UniMod:4)DHAEDAGVIC(UniMod:4)SK_3	1/Q86VB7	1	b	4	light
1/Q9Y305	711.695	1234.61	121.5	1408356_y10_1_ILEDLDSLGVLIC(UniMod:4)YMHNK_3	-1	1907.6	100947_ILEDLDSLGVLIC(UniMod:4)YMHNK_3	0	ILEDLDSLGVLICYMHNK	y10/-0.010	ILEDLDSLGVLIC(UniMod:4)YMHNK	3	100947_ILEDLDSLGVLIC(UniMod:4)YMHNK_3	1/Q9Y305	1	y	10	light
1/Q9Y305	711.695	953.956	121.5	1408350_y16_2_ILEDLDSLGVLIC(UniMod:4)YMHNK_3	-1	4355.9	100947_ILEDLDSLGVLIC(UniMod:4)YMHNK_3	0	ILEDLDSLGVLICYMHNK	y16^2/0.003	ILEDLDSLGVLIC(UniMod:4)YMHNK	3	100947_ILEDLDSLGVLIC(UniMod:4)YMHNK_3	1/Q9Y305	2	y	16	light
1/Q9Y305	711.695	398.215	121.5	1408340_y3_1_ILEDLDSLGVLIC(UniMod:4)YMHNK_3	-1	1968.7	100947_ILEDLDSLGVLIC(UniMod:4)YMHNK_3	0	ILEDLDSLGVLICYMHNK	y3/0.001,m4:11^2/-0.001	ILEDLDSLGVLIC(UniMod:4)YMHNK	3	100947_ILEDLDSLGVLIC(UniMod:4)YMHNK_3	1/Q9Y305	1	y	3	light
1/Q9Y305	711.695	852.349	121.5	1408347_y6_1_ILEDLDSLGVLIC(UniMod:4)YMHNK_3	-1	2120.7	100947_ILEDLDSLGVLIC(UniMod:4)YMHNK_3	0	ILEDLDSLGVLICYMHNK	y6/-0.001	ILEDLDSLGVLIC(UniMod:4)YMHNK	3	100947_ILEDLDSLGVLIC(UniMod:4)YMHNK_3	1/Q9Y305	1	y	6	light
1/Q9Y305	711.695	1078.52	121.5	1408355_y8_1_ILEDLDSLGVLIC(UniMod:4)YMHNK_3	-1	2053.8	100947_ILEDLDSLGVLIC(UniMod:4)YMHNK_3	0	ILEDLDSLGVLICYMHNK	y8/0.001	ILEDLDSLGVLIC(UniMod:4)YMHNK	3	100947_ILEDLDSLGVLIC(UniMod:4)YMHNK_3	1/Q9Y305	1	y	8	light
1/Q9Y305	711.695	965.433	121.5	1408352_y7_1_ILEDLDSLGVLIC(UniMod:4)YMHNK_3	-1	1651.1	100947_ILEDLDSLGVLIC(UniMod:4)YMHNK_3	0	ILEDLDSLGVLICYMHNK	y7/-0.004	ILEDLDSLGVLIC(UniMod:4)YMHNK	3	100947_ILEDLDSLGVLIC(UniMod:4)YMHNK_3	1/Q9Y305	1	y	7	light
1/Q9Y305	717.027	868.344	98.5	1408365_y6_1_ILEDLDSLGVLIC(UniMod:4)YM(UniMod:35)HNK_3	-1	1053.7	100948_ILEDLDSLGVLIC(UniMod:4)YM(UniMod:35)HNK_3	0	ILEDLDSLGVLICYMHNK	y6/-0.015	ILEDLDSLGVLIC(UniMod:4)YM(UniMod:35)HNK	3	100948_ILEDLDSLGVLIC(UniMod:4)YM(UniMod:35)HNK_3	1/Q9Y305	1	y	6	light
1/Q9Y305	717.027	398.215	98.5	1408358_y3_1_ILEDLDSLGVLIC(UniMod:4)YM(UniMod:35)HNK_3	-1	1557.5	100948_ILEDLDSLGVLIC(UniMod:4)YM(UniMod:35)HNK_3	0	ILEDLDSLGVLICYMHNK	y3/-0.010,m4:11^2/-0.011	ILEDLDSLGVLIC(UniMod:4)YM(UniMod:35)HNK	3	100948_ILEDLDSLGVLIC(UniMod:4)YM(UniMod:35)HNK_3	1/Q9Y305	1	y	3	light
1/Q9Y305	717.027	961.953	98.5	1408367_y16_2_ILEDLDSLGVLIC(UniMod:4)YM(UniMod:35)HNK_3	-1	2404.4	100948_ILEDLDSLGVLIC(UniMod:4)YM(UniMod:35)HNK_3	0	ILEDLDSLGVLICYMHNK	y16^2/-0.002	ILEDLDSLGVLIC(UniMod:4)YM(UniMod:35)HNK	3	100948_ILEDLDSLGVLIC(UniMod:4)YM(UniMod:35)HNK_3	1/Q9Y305	2	y	16	light
1/Q9Y305	717.027	545.25	98.5	1408360_y4_1_ILEDLDSLGVLIC(UniMod:4)YM(UniMod:35)HNK_3	-1	792.9	100948_ILEDLDSLGVLIC(UniMod:4)YM(UniMod:35)HNK_3	0	ILEDLDSLGVLICYMHNK	y4/-0.008	ILEDLDSLGVLIC(UniMod:4)YM(UniMod:35)HNK	3	100948_ILEDLDSLGVLIC(UniMod:4)YM(UniMod:35)HNK_3	1/Q9Y305	1	y	4	light
1/Q9Y305	717.027	1250.6	98.5	1408369_y10_1_ILEDLDSLGVLIC(UniMod:4)YM(UniMod:35)HNK_3	-1	847	100948_ILEDLDSLGVLIC(UniMod:4)YM(UniMod:35)HNK_3	0	ILEDLDSLGVLICYMHNK	y10/0.006	ILEDLDSLGVLIC(UniMod:4)YM(UniMod:35)HNK	3	100948_ILEDLDSLGVLIC(UniMod:4)YM(UniMod:35)HNK_3	1/Q9Y305	1	y	10	light
1/Q9Y305	717.027	1018.5	98.5	1408368_y17_2_ILEDLDSLGVLIC(UniMod:4)YM(UniMod:35)HNK_3	-1	1255.2	100948_ILEDLDSLGVLIC(UniMod:4)YM(UniMod:35)HNK_3	0	ILEDLDSLGVLICYMHNK	y17^2/0.013	ILEDLDSLGVLIC(UniMod:4)YM(UniMod:35)HNK	3	100948_ILEDLDSLGVLIC(UniMod:4)YM(UniMod:35)HNK_3	1/Q9Y305	2	y	17	light
1/P02787	583.799	466.241	-35.1	97137_b4_1_HQTVPQNTGGK_2	-1	2164.1	10097_HQTVPQNTGGK_2	0	HQTVPQNTGGK	b4/0.002	HQTVPQNTGGK	2	10097_HQTVPQNTGGK_2	1/P02787	1	b	4	light
1/P02787	583.799	800.426	-35.1	97142_y8_1_HQTVPQNTGGK_2	-1	1385.8	10097_HQTVPQNTGGK_2	0	HQTVPQNTGGK	y8/0.000	HQTVPQNTGGK	2	10097_HQTVPQNTGGK_2	1/P02787	1	y	8	light
1/P02787	583.799	362.203	-35.1	97134_y4_1_HQTVPQNTGGK_2	-1	1651.6	10097_HQTVPQNTGGK_2	0	HQTVPQNTGGK	y4/0.003	HQTVPQNTGGK	2	10097_HQTVPQNTGGK_2	1/P02787	1	y	4	light
1/P02787	583.799	701.358	-35.1	97141_y7_1_HQTVPQNTGGK_2	-1	10000	10097_HQTVPQNTGGK_2	0	HQTVPQNTGGK	y7/0.001	HQTVPQNTGGK	2	10097_HQTVPQNTGGK_2	1/P02787	1	y	7	light
1/P02787	583.799	476.246	-35.1	97138_y5_1_HQTVPQNTGGK_2	-1	1568.4	10097_HQTVPQNTGGK_2	0	HQTVPQNTGGK	y5/0.002	HQTVPQNTGGK	2	10097_HQTVPQNTGGK_2	1/P02787	1	y	5	light
1/P02787	583.799	901.474	-35.1	97144_y9_1_HQTVPQNTGGK_2	-1	4905	10097_HQTVPQNTGGK_2	0	HQTVPQNTGGK	y9/0.001	HQTVPQNTGGK	2	10097_HQTVPQNTGGK_2	1/P02787	1	y	9	light
1/P36776	644.885	503.294	86	1408792_y4_1_ILEFIAVSQLR_2	-1	6297.1	100978_ILEFIAVSQLR_2	0	ILEFIAVSQLR	y4/-0.005,b4/0.002,m2:5/0.002	ILEFIAVSQLR	2	100978_ILEFIAVSQLR_2	1/P36776	1	y	4	light
1/P36776	644.885	786.483	86	1408800_y7_1_ILEFIAVSQLR_2	-1	5190.9	100978_ILEFIAVSQLR_2	0	ILEFIAVSQLR	y7/-0.003,b7/0.004	ILEFIAVSQLR	2	100978_ILEFIAVSQLR_2	1/P36776	1	y	7	light
1/P36776	644.885	1062.59	86	1408805_y9_1_ILEFIAVSQLR_2	-1	5128.1	100978_ILEFIAVSQLR_2	0	ILEFIAVSQLR	y9/-0.001	ILEFIAVSQLR	2	100978_ILEFIAVSQLR_2	1/P36776	1	y	9	light
1/P36776	644.885	673.399	86	1408798_y6_1_ILEFIAVSQLR_2	-1	10000	100978_ILEFIAVSQLR_2	0	ILEFIAVSQLR	y6/-0.002,m2:7/0.005	ILEFIAVSQLR	2	100978_ILEFIAVSQLR_2	1/P36776	1	y	6	light
1/P36776	644.885	933.552	86	1408803_y8_1_ILEFIAVSQLR_2	-1	4140.7	100978_ILEFIAVSQLR_2	0	ILEFIAVSQLR	y8/-0.003	ILEFIAVSQLR	2	100978_ILEFIAVSQLR_2	1/P36776	1	y	8	light
1/P36776	644.885	602.362	86	1408794_y5_1_ILEFIAVSQLR_2	-1	3839	100978_ILEFIAVSQLR_2	0	ILEFIAVSQLR	y5/-0.002	ILEFIAVSQLR	2	100978_ILEFIAVSQLR_2	1/P36776	1	y	5	light
1/P36776	430.259	503.294	85	1408811_y4_1_ILEFIAVSQLR_3	-1	10000	100979_ILEFIAVSQLR_3	0	ILEFIAVSQLR	y4/-0.010,b4/-0.003,m2:5/-0.003	ILEFIAVSQLR	3	100979_ILEFIAVSQLR_3	1/P36776	1	y	4	light
1/P36776	430.259	416.262	85	1408810_y3_1_ILEFIAVSQLR_3	-1	1862.8	100979_ILEFIAVSQLR_3	0	ILEFIAVSQLR	y3/-0.004	ILEFIAVSQLR	3	100979_ILEFIAVSQLR_3	1/P36776	1	y	3	light
1/P36776	430.259	602.362	85	1408814_y5_1_ILEFIAVSQLR_3	-1	3198	100979_ILEFIAVSQLR_3	0	ILEFIAVSQLR	[y5/-0.012]	ILEFIAVSQLR	3	100979_ILEFIAVSQLR_3	1/P36776	1	y	5	light
1/P36776	430.259	673.399	85	1408817_y6_1_ILEFIAVSQLR_3	-1	3058.8	100979_ILEFIAVSQLR_3	0	ILEFIAVSQLR	y6/-0.013,m2:7/-0.006	ILEFIAVSQLR	3	100979_ILEFIAVSQLR_3	1/P36776	1	y	6	light
1/P36776	430.259	687.408	85	1408818_b6_1_ILEFIAVSQLR_3	-1	2967.6	100979_ILEFIAVSQLR_3	0	ILEFIAVSQLR	b6/-0.009	ILEFIAVSQLR	3	100979_ILEFIAVSQLR_3	1/P36776	1	b	6	light
1/P36776	430.259	616.37	85	1408816_b5_1_ILEFIAVSQLR_3	-1	2353	100979_ILEFIAVSQLR_3	0	ILEFIAVSQLR	b5/-0.011	ILEFIAVSQLR	3	100979_ILEFIAVSQLR_3	1/P36776	1	b	5	light
1/P02787	658.998	404.229	0	97159_y3_1_HQTVPQNTGGKNPDPWAK_3	-1	1764.7	10099_HQTVPQNTGGKNPDPWAK_3	0	HQTVPQNTGGKNPDPWAK	y3/-0.020	HQTVPQNTGGKNPDPWAK	3	10099_HQTVPQNTGGKNPDPWAK_3	1/P02787	1	y	3	light
1/P02787	658.998	367.172	0	97158_b3_1_HQTVPQNTGGKNPDPWAK_3	-1	1764.7	10099_HQTVPQNTGGKNPDPWAK_3	0	HQTVPQNTGGKNPDPWAK	b3/-0.001	HQTVPQNTGGKNPDPWAK	3	10099_HQTVPQNTGGKNPDPWAK_3	1/P02787	1	b	3	light
1/P02787	658.998	713.362	0	97162_y6_1_HQTVPQNTGGKNPDPWAK_3	-1	2352.9	10099_HQTVPQNTGGKNPDPWAK_3	0	HQTVPQNTGGKNPDPWAK	y6/0.016	HQTVPQNTGGKNPDPWAK	3	10099_HQTVPQNTGGKNPDPWAK_3	1/P02787	1	y	6	light
1/P02787	658.998	466.241	0	97160_b4_1_HQTVPQNTGGKNPDPWAK_3	-1	2941.2	10099_HQTVPQNTGGKNPDPWAK_3	0	HQTVPQNTGGKNPDPWAK	b4/-0.007,y4-35/-0.011	HQTVPQNTGGKNPDPWAK	3	10099_HQTVPQNTGGKNPDPWAK_3	1/P02787	1	b	4	light
1/P02787	658.998	737.855	0	97163_b14_2_HQTVPQNTGGKNPDPWAK_3	-1	1764.7	10099_HQTVPQNTGGKNPDPWAK_3	0	HQTVPQNTGGKNPDPWAK	b14^2/-0.012,y14-35^2/-0.014	HQTVPQNTGGKNPDPWAK	3	10099_HQTVPQNTGGKNPDPWAK_3	1/P02787	2	b	14	light
1/P02787	658.998	501.282	0	97161_y4_1_HQTVPQNTGGKNPDPWAK_3	-1	9411.8	10099_HQTVPQNTGGKNPDPWAK_3	0	HQTVPQNTGGKNPDPWAK	y4/0.003	HQTVPQNTGGKNPDPWAK	3	10099_HQTVPQNTGGKNPDPWAK_3	1/P02787	1	y	4	light
1/P52732	532.597	756.356	61.4	1547007_KTYTFDMVFGASTK_3	-1	3913	101047_KTYTFDMVFGASTK_3	0	KTYTFDMVFGASTK	b6/0.002	KTYTFDMVFGASTK	3	101047_KTYTFDMVFGASTK_3	1/P52732	1	b	-1	light
1/P52732	532.597	887.397	61.4	1547009_KTYTFDMVFGASTK_3	-1	5174.3	101047_KTYTFDMVFGASTK_3	0	KTYTFDMVFGASTK	b7/0.002	KTYTFDMVFGASTK	3	101047_KTYTFDMVFGASTK_3	1/P52732	1	b	-1	light
1/P52732	532.597	986.465	61.4	1547011_KTYTFDMVFGASTK_3	-1	3080	101047_KTYTFDMVFGASTK_3	0	KTYTFDMVFGASTK	b8/-0.007	KTYTFDMVFGASTK	3	101047_KTYTFDMVFGASTK_3	1/P52732	1	b	-1	light
1/P52732	532.597	709.388	61.4	1547006_KTYTFDMVFGASTK_3	-1	2965	101047_KTYTFDMVFGASTK_3	0	KTYTFDMVFGASTK	y7/0.002	KTYTFDMVFGASTK	3	101047_KTYTFDMVFGASTK_3	1/P52732	1	y	-1	light
1/P52732	532.597	463.251	61.4	1547000_KTYTFDMVFGASTK_3	-1	5502.2	101047_KTYTFDMVFGASTK_3	0	KTYTFDMVFGASTK	y5/-0.003	KTYTFDMVFGASTK	3	101047_KTYTFDMVFGASTK_3	1/P52732	1	y	-1	light
1/P52732	532.597	610.32	61.4	1547004_KTYTFDMVFGASTK_3	-1	10000	101047_KTYTFDMVFGASTK_3	0	KTYTFDMVFGASTK	y6/0.002	KTYTFDMVFGASTK	3	101047_KTYTFDMVFGASTK_3	1/P52732	1	y	-1	light
1/P27487	623.34	1016.53	41	1547021_KTYTLTDYLK_2	-1	705.6	101048_KTYTLTDYLK_2	0	KTYTLTDYLK	y8/-0.007	KTYTLTDYLK	2	101048_KTYTLTDYLK_2	1/P27487	1	y	-1	light
1/P27487	623.34	752.419	41	1547017_KTYTLTDYLK_2	-1	298.2	101048_KTYTLTDYLK_2	0	KTYTLTDYLK	y6/-0.005	KTYTLTDYLK	2	101048_KTYTLTDYLK_2	1/P27487	1	y	-1	light
1/P27487	623.34	853.467	41	1547019_KTYTLTDYLK_2	-1	420.5	101048_KTYTLTDYLK_2	0	KTYTLTDYLK	y7/0.011	KTYTLTDYLK	2	101048_KTYTLTDYLK_2	1/P27487	1	y	-1	light
1/P27487	623.34	823.42	41	1547018_KTYTLTDYLK_2	-1	396.8	101048_KTYTLTDYLK_2	0	KTYTLTDYLK	b7/0.003	KTYTLTDYLK	2	101048_KTYTLTDYLK_2	1/P27487	1	b	-1	light
1/P27487	623.34	423.26	41	1547013_KTYTLTDYLK_2	-1	373	101048_KTYTLTDYLK_2	0	KTYTLTDYLK	y3/0.008	KTYTLTDYLK	2	101048_KTYTLTDYLK_2	1/P27487	1	y	-1	light
1/P27487	623.34	1117.58	41	1547023_KTYTLTDYLK_2	-1	1125.1	101048_KTYTLTDYLK_2	0	KTYTLTDYLK	y9/-0.009,b9+18/-0.009	KTYTLTDYLK	2	101048_KTYTLTDYLK_2	1/P27487	1	y	-1	light
1/Q6P988	683.804	472.288	43.8	6571_y4_1_GC(UniMod:4)PVHLVDSC(UniMod:4)PWPHC(UniMod:4)NPSC(UniMod:4)PTVR_4	-1	7849.5	1012_GC(UniMod:4)PVHLVDSC(UniMod:4)PWPHC(UniMod:4)NPSC(UniMod:4)PTVR_4	0	GCPVHLVDSCPWPHCNPSCPTVR	y4/0.004	GC(UniMod:4)PVHLVDSC(UniMod:4)PWPHC(UniMod:4)NPSC(UniMod:4)PTVR	4	1012_GC(UniMod:4)PVHLVDSC(UniMod:4)PWPHC(UniMod:4)NPSC(UniMod:4)PTVR_4	1/Q6P988	1	y	4	light
1/Q6P988	683.804	632.318	43.8	6574_y5_1_GC(UniMod:4)PVHLVDSC(UniMod:4)PWPHC(UniMod:4)NPSC(UniMod:4)PTVR_4	-1	1505.4	1012_GC(UniMod:4)PVHLVDSC(UniMod:4)PWPHC(UniMod:4)NPSC(UniMod:4)PTVR_4	0	GCPVHLVDSCPWPHCNPSCPTVR	y5/0.017	GC(UniMod:4)PVHLVDSC(UniMod:4)PWPHC(UniMod:4)NPSC(UniMod:4)PTVR	4	1012_GC(UniMod:4)PVHLVDSC(UniMod:4)PWPHC(UniMod:4)NPSC(UniMod:4)PTVR_4	1/Q6P988	1	y	5	light
1/Q6P988	683.804	662.798	43.8	6575_y11_2_GC(UniMod:4)PVHLVDSC(UniMod:4)PWPHC(UniMod:4)NPSC(UniMod:4)PTVR_4	-1	1021.5	1012_GC(UniMod:4)PVHLVDSC(UniMod:4)PWPHC(UniMod:4)NPSC(UniMod:4)PTVR_4	0	GCPVHLVDSCPWPHCNPSCPTVR	y11^2/0.009	GC(UniMod:4)PVHLVDSC(UniMod:4)PWPHC(UniMod:4)NPSC(UniMod:4)PTVR	4	1012_GC(UniMod:4)PVHLVDSC(UniMod:4)PWPHC(UniMod:4)NPSC(UniMod:4)PTVR_4	1/Q6P988	2	y	11	light
1/Q6P988	683.804	551.239	43.8	6573_b5_1_GC(UniMod:4)PVHLVDSC(UniMod:4)PWPHC(UniMod:4)NPSC(UniMod:4)PTVR_4	-1	483.9	1012_GC(UniMod:4)PVHLVDSC(UniMod:4)PWPHC(UniMod:4)NPSC(UniMod:4)PTVR_4	0	GCPVHLVDSCPWPHCNPSCPTVR	b5/-0.003	GC(UniMod:4)PVHLVDSC(UniMod:4)PWPHC(UniMod:4)NPSC(UniMod:4)PTVR	4	1012_GC(UniMod:4)PVHLVDSC(UniMod:4)PWPHC(UniMod:4)NPSC(UniMod:4)PTVR_4	1/Q6P988	1	b	5	light
1/Q6P988	683.804	664.324	43.8	6576_b6_1_GC(UniMod:4)PVHLVDSC(UniMod:4)PWPHC(UniMod:4)NPSC(UniMod:4)PTVR_4	-1	1129	1012_GC(UniMod:4)PVHLVDSC(UniMod:4)PWPHC(UniMod:4)NPSC(UniMod:4)PTVR_4	0	GCPVHLVDSCPWPHCNPSCPTVR	b6/0.002	GC(UniMod:4)PVHLVDSC(UniMod:4)PWPHC(UniMod:4)NPSC(UniMod:4)PTVR	4	1012_GC(UniMod:4)PVHLVDSC(UniMod:4)PWPHC(UniMod:4)NPSC(UniMod:4)PTVR_4	1/Q6P988	1	b	6	light
1/Q6P988	683.804	878.419	43.8	6577_b8_1_GC(UniMod:4)PVHLVDSC(UniMod:4)PWPHC(UniMod:4)NPSC(UniMod:4)PTVR_4	-1	806.5	1012_GC(UniMod:4)PVHLVDSC(UniMod:4)PWPHC(UniMod:4)NPSC(UniMod:4)PTVR_4	0	GCPVHLVDSCPWPHCNPSCPTVR	b8/-0.011	GC(UniMod:4)PVHLVDSC(UniMod:4)PWPHC(UniMod:4)NPSC(UniMod:4)PTVR	4	1012_GC(UniMod:4)PVHLVDSC(UniMod:4)PWPHC(UniMod:4)NPSC(UniMod:4)PTVR_4	1/Q6P988	1	b	8	light
1/Q5VWZ2	485.5	473.283	40.3	97413_y4_1_HSASLIFLHGSGDSGQGLR_4	-1	3455.7	10122_HSASLIFLHGSGDSGQGLR_4	0	HSASLIFLHGSGDSGQGLR	y4/0.006	HSASLIFLHGSGDSGQGLR	4	10122_HSASLIFLHGSGDSGQGLR_4	1/Q5VWZ2	1	y	4	light
1/Q5VWZ2	485.5	530.305	40.3	97415_y5_1_HSASLIFLHGSGDSGQGLR_4	-1	1724.4	10122_HSASLIFLHGSGDSGQGLR_4	0	HSASLIFLHGSGDSGQGLR	y5/0.006	HSASLIFLHGSGDSGQGLR	4	10122_HSASLIFLHGSGDSGQGLR_4	1/Q5VWZ2	1	y	5	light
1/Q5VWZ2	485.5	756.404	40.3	97418_b7_1_HSASLIFLHGSGDSGQGLR_4	-1	642.4	10122_HSASLIFLHGSGDSGQGLR_4	0	HSASLIFLHGSGDSGQGLR	b7/0.014,y15-45^2/0.016	HSASLIFLHGSGDSGQGLR	4	10122_HSASLIFLHGSGDSGQGLR_4	1/Q5VWZ2	1	b	7	light
1/Q5VWZ2	485.5	383.167	40.3	97412_b4_1_HSASLIFLHGSGDSGQGLR_4	-1	1029.8	10122_HSASLIFLHGSGDSGQGLR_4	0	HSASLIFLHGSGDSGQGLR	b4/0.001	HSASLIFLHGSGDSGQGLR	4	10122_HSASLIFLHGSGDSGQGLR_4	1/Q5VWZ2	1	b	4	light
1/Q5VWZ2	485.5	496.251	40.3	97414_b5_1_HSASLIFLHGSGDSGQGLR_4	-1	3119.9	10122_HSASLIFLHGSGDSGQGLR_4	0	HSASLIFLHGSGDSGQGLR	b5/0.008	HSASLIFLHGSGDSGQGLR	4	10122_HSASLIFLHGSGDSGQGLR_4	1/Q5VWZ2	1	b	5	light
1/Q5VWZ2	485.5	609.335	40.3	97416_b6_1_HSASLIFLHGSGDSGQGLR_4	-1	1323	10122_HSASLIFLHGSGDSGQGLR_4	0	HSASLIFLHGSGDSGQGLR	b6/0.008	HSASLIFLHGSGDSGQGLR	4	10122_HSASLIFLHGSGDSGQGLR_4	1/Q5VWZ2	1	b	6	light
1/P54577	425.207	651.371	3.2	98089_y5_1_HPDADSLYVEK_3	-1	1588.1	10129_HPDADSLYVEK_3	0	HPDADSLYVEK	y5/0.005	HPDADSLYVEK	3	10129_HPDADSLYVEK_3	1/P54577	1	y	5	light
1/P54577	425.207	421.183	3.2	98085_b4_1_HPDADSLYVEK_3	-1	1283.6	10129_HPDADSLYVEK_3	0	HPDADSLYVEK	b4/-0.006	HPDADSLYVEK	3	10129_HPDADSLYVEK_3	1/P54577	1	b	4	light
1/P54577	425.207	538.287	3.2	98087_y4_1_HPDADSLYVEK_3	-1	7614.2	10129_HPDADSLYVEK_3	0	HPDADSLYVEK	y4/-0.004	HPDADSLYVEK	3	10129_HPDADSLYVEK_3	1/P54577	1	y	4	light
1/P54577	425.207	536.21	3.2	98086_b5_1_HPDADSLYVEK_3	-1	1768	10129_HPDADSLYVEK_3	0	HPDADSLYVEK	b5/0.013	HPDADSLYVEK	3	10129_HPDADSLYVEK_3	1/P54577	1	b	5	light
1/P54577	425.207	623.242	3.2	98088_b6_1_HPDADSLYVEK_3	-1	3887.9	10129_HPDADSLYVEK_3	0	HPDADSLYVEK	b6/-0.001	HPDADSLYVEK	3	10129_HPDADSLYVEK_3	1/P54577	1	b	6	light
1/P54577	425.207	375.224	3.2	98084_y3_1_HPDADSLYVEK_3	-1	2927.4	10129_HPDADSLYVEK_3	0	HPDADSLYVEK	y3/0.012	HPDADSLYVEK	3	10129_HPDADSLYVEK_3	1/P54577	1	y	3	light
1/Q8IY17	485.761	753.462	-14.6	6585_y7_1_GC(UniMod:4)SHIGVLK_2	-1	924.4	1013_GC(UniMod:4)SHIGVLK_2	0	GCSHIGVLK	y7/0.011	GC(UniMod:4)SHIGVLK	2	1013_GC(UniMod:4)SHIGVLK_2	1/Q8IY17	1	y	7	light
1/Q8IY17	485.761	824.408	-14.6	6586_b8_1_GC(UniMod:4)SHIGVLK_2	-1	441.2	1013_GC(UniMod:4)SHIGVLK_2	0	GCSHIGVLK	b8/-0.004	GC(UniMod:4)SHIGVLK	2	1013_GC(UniMod:4)SHIGVLK_2	1/Q8IY17	1	b	8	light
1/Q8IY17	485.761	442.15	-14.6	6580_b4_1_GC(UniMod:4)SHIGVLK_2	-1	435.4	1013_GC(UniMod:4)SHIGVLK_2	0	GCSHIGVLK	b4/0.011	GC(UniMod:4)SHIGVLK	2	1013_GC(UniMod:4)SHIGVLK_2	1/Q8IY17	1	b	4	light
1/Q8IY17	485.761	416.287	-14.6	6579_y4_1_GC(UniMod:4)SHIGVLK_2	-1	426.9	1013_GC(UniMod:4)SHIGVLK_2	0	GCSHIGVLK	y4/0.005	GC(UniMod:4)SHIGVLK	2	1013_GC(UniMod:4)SHIGVLK_2	1/Q8IY17	1	y	4	light
1/Q8IY17	485.761	529.371	-14.6	6581_y5_1_GC(UniMod:4)SHIGVLK_2	-1	394.2	1013_GC(UniMod:4)SHIGVLK_2	0	GCSHIGVLK	y5/0.004	GC(UniMod:4)SHIGVLK	2	1013_GC(UniMod:4)SHIGVLK_2	1/Q8IY17	1	y	5	light
1/Q8IY17	485.761	555.234	-14.6	6582_b5_1_GC(UniMod:4)SHIGVLK_2	-1	431.9	1013_GC(UniMod:4)SHIGVLK_2	0	GCSHIGVLK	b5/0.015,m2:6/0.015	GC(UniMod:4)SHIGVLK	2	1013_GC(UniMod:4)SHIGVLK_2	1/Q8IY17	1	b	5	light
1/P10643	473.574	596.275	6.3	1551710_KVFSGDGKDFYR_3	-1	1518.4	101334_KVFSGDGKDFYR_3	0	KVFSGDGKDFYR	y10^2/-0.009	KVFSGDGKDFYR	3	101334_KVFSGDGKDFYR_3	1/P10643	2	y	-1	light
1/P10643	473.574	785.394	6.3	1551715_KVFSGDGKDFYR_3	-1	1259.7	101334_KVFSGDGKDFYR_3	0	KVFSGDGKDFYR	y6/-0.000,b8-34/0.011	KVFSGDGKDFYR	3	101334_KVFSGDGKDFYR_3	1/P10643	1	y	-1	light
1/P10643	473.574	393.201	6.3	1551707_KVFSGDGKDFYR_3	-1	1392.6	101334_KVFSGDGKDFYR_3	0	KVFSGDGKDFYR	y6^2/0.002,b8-34^2/0.008	KVFSGDGKDFYR	3	101334_KVFSGDGKDFYR_3	1/P10643	2	y	-1	light
1/P10643	473.574	600.278	6.3	1551711_KVFSGDGKDFYR_3	-1	2001.9	101334_KVFSGDGKDFYR_3	0	KVFSGDGKDFYR	y4/-0.010,b6-34/0.002	KVFSGDGKDFYR	3	101334_KVFSGDGKDFYR_3	1/P10643	1	y	-1	light
1/P10643	473.574	645.809	6.3	1551713_KVFSGDGKDFYR_3	-1	938.1	101334_KVFSGDGKDFYR_3	0	KVFSGDGKDFYR	y11^2/0.011	KVFSGDGKDFYR	3	101334_KVFSGDGKDFYR_3	1/P10643	2	y	-1	light
1/P10643	473.574	485.251	6.3	1551708_KVFSGDGKDFYR_3	-1	1789.2	101334_KVFSGDGKDFYR_3	0	KVFSGDGKDFYR	y3/-0.002,b5-34/0.009	KVFSGDGKDFYR	3	101334_KVFSGDGKDFYR_3	1/P10643	1	y	-1	light
1/P49327	434.576	551.795	7	145676_y9_2_AKYHGNVMLLR_3	-1	678.3	10135_AKYHGNVMLLR_3	0	AKYHGNVMLLR	y9^2/-0.016	AKYHGNVMLLR	3	10135_AKYHGNVMLLR_3	1/P49327	2	y	9	light
1/P49327	434.576	385.701	7	145671_b7_2_AKYHGNVMLLR_3	-1	419.1	10135_AKYHGNVMLLR_3	0	AKYHGNVMLLR	b7^2/0.004	AKYHGNVMLLR	3	10135_AKYHGNVMLLR_3	1/P49327	2	b	7	light
1/P49327	434.576	802.46	7	145682_y7_1_AKYHGNVMLLR_3	-1	685.6	10135_AKYHGNVMLLR_3	0	AKYHGNVMLLR	y7/-0.000	AKYHGNVMLLR	3	10135_AKYHGNVMLLR_3	1/P49327	1	y	7	light
1/P49327	434.576	470.263	7	145674_y8_2_AKYHGNVMLLR_3	-1	417.1	10135_AKYHGNVMLLR_3	0	AKYHGNVMLLR	y8^2/0.001	AKYHGNVMLLR	3	10135_AKYHGNVMLLR_3	1/P49327	2	y	8	light
1/P49327	434.576	401.287	7	145672_y3_1_AKYHGNVMLLR_3	-1	1940.3	10135_AKYHGNVMLLR_3	0	AKYHGNVMLLR	y3/0.001	AKYHGNVMLLR	3	10135_AKYHGNVMLLR_3	1/P49327	1	y	3	light
1/P49327	434.576	532.328	7	145675_y4_1_AKYHGNVMLLR_3	-1	1510	10135_AKYHGNVMLLR_3	0	AKYHGNVMLLR	y4/-0.001	AKYHGNVMLLR	3	10135_AKYHGNVMLLR_3	1/P49327	1	y	4	light
1/P00747	649.828	713.358	5.9	97620_y6_1_HSIFTPETNPR_2	-1	5522.2	10139_HSIFTPETNPR_2	0	HSIFTPETNPR	y6/0.002	HSIFTPETNPR	2	10139_HSIFTPETNPR_2	1/P00747	1	y	6	light
1/P00747	649.828	487.262	5.9	97619_y4_1_HSIFTPETNPR_2	-1	1765.9	10139_HSIFTPETNPR_2	0	HSIFTPETNPR	y4/-0.008	HSIFTPETNPR	2	10139_HSIFTPETNPR_2	1/P00747	1	y	4	light
1/P00747	649.828	961.474	5.9	97622_y8_1_HSIFTPETNPR_2	-1	5508.7	10139_HSIFTPETNPR_2	0	HSIFTPETNPR	y8/0.001	HSIFTPETNPR	2	10139_HSIFTPETNPR_2	1/P00747	1	y	8	light
1/P00747	649.828	814.405	5.9	97621_y7_1_HSIFTPETNPR_2	-1	2860.7	10139_HSIFTPETNPR_2	0	HSIFTPETNPR	y7/-0.006	HSIFTPETNPR	2	10139_HSIFTPETNPR_2	1/P00747	1	y	7	light
1/P00747	649.828	1161.59	5.9	97624_y10_1_HSIFTPETNPR_2	-1	5119	10139_HSIFTPETNPR_2	0	HSIFTPETNPR	y10/0.005	HSIFTPETNPR	2	10139_HSIFTPETNPR_2	1/P00747	1	y	10	light
1/P00747	649.828	1074.56	5.9	97623_y9_1_HSIFTPETNPR_2	-1	5520	10139_HSIFTPETNPR_2	0	HSIFTPETNPR	y9/-0.003	HSIFTPETNPR	2	10139_HSIFTPETNPR_2	1/P00747	1	y	9	light
1/P00747	433.554	485.251	4.8	97627_b4_1_HSIFTPETNPR_3	-1	6778.2	10140_HSIFTPETNPR_3	0	HSIFTPETNPR	b4/0.001	HSIFTPETNPR	3	10140_HSIFTPETNPR_3	1/P00747	1	b	4	light
1/P00747	433.554	586.298	4.8	97629_b5_1_HSIFTPETNPR_3	-1	9432.6	10140_HSIFTPETNPR_3	0	HSIFTPETNPR	b5/0.003	HSIFTPETNPR	3	10140_HSIFTPETNPR_3	1/P00747	1	b	5	light
1/P00747	433.554	616.305	4.8	97630_y5_1_HSIFTPETNPR_3	-1	5933.7	10140_HSIFTPETNPR_3	0	HSIFTPETNPR	y5/-0.002	HSIFTPETNPR	3	10140_HSIFTPETNPR_3	1/P00747	1	y	5	light
1/P00747	433.554	487.262	4.8	97628_y4_1_HSIFTPETNPR_3	-1	10000	10140_HSIFTPETNPR_3	0	HSIFTPETNPR	y4/0.002	HSIFTPETNPR	3	10140_HSIFTPETNPR_3	1/P00747	1	y	4	light
1/P00747	433.554	713.358	4.8	97631_y6_1_HSIFTPETNPR_3	-1	9923.6	10140_HSIFTPETNPR_3	0	HSIFTPETNPR	y6/0.004	HSIFTPETNPR	3	10140_HSIFTPETNPR_3	1/P00747	1	y	6	light
1/P00747	433.554	386.215	4.8	97626_y3_1_HSIFTPETNPR_3	-1	2007.6	10140_HSIFTPETNPR_3	0	HSIFTPETNPR	y3/0.003	HSIFTPETNPR	3	10140_HSIFTPETNPR_3	1/P00747	1	y	3	light
1/P34913	649.891	1072.61	87.2	1414898_y10_1_ILIPALMVTAEK_2	-1	1151.3	101408_ILIPALMVTAEK_2	0	ILIPALMVTAEK	y10/-0.006	ILIPALMVTAEK	2	101408_ILIPALMVTAEK_2	1/P34913	1	y	10	light
1/P34913	649.891	791.433	87.2	1414895_y7_1_ILIPALMVTAEK_2	-1	1079.9	101408_ILIPALMVTAEK_2	0	ILIPALMVTAEK	y7/-0.007	ILIPALMVTAEK	2	101408_ILIPALMVTAEK_2	1/P34913	1	y	7	light
1/P34913	649.891	959.523	87.2	1414897_y9_1_ILIPALMVTAEK_2	-1	9441.7	101408_ILIPALMVTAEK_2	0	ILIPALMVTAEK	y9/-0.004	ILIPALMVTAEK	2	101408_ILIPALMVTAEK_2	1/P34913	1	y	9	light
1/P34913	649.891	448.24	87.2	1414889_y4_1_ILIPALMVTAEK_2	-1	1221.8	101408_ILIPALMVTAEK_2	0	ILIPALMVTAEK	y4/-0.002	ILIPALMVTAEK	2	101408_ILIPALMVTAEK_2	1/P34913	1	y	4	light
1/P34913	649.891	536.807	87.2	1414892_y10_2_ILIPALMVTAEK_2	-1	1383.6	101408_ILIPALMVTAEK_2	0	ILIPALMVTAEK	y10^2/-0.000	ILIPALMVTAEK	2	101408_ILIPALMVTAEK_2	1/P34913	2	y	10	light
1/P34913	649.891	480.265	87.2	1414890_y9_2_ILIPALMVTAEK_2	-1	2771.5	101408_ILIPALMVTAEK_2	0	ILIPALMVTAEK	y9^2/-0.001	ILIPALMVTAEK	2	101408_ILIPALMVTAEK_2	1/P34913	2	y	9	light
1/P34913	657.889	975.518	70.9	1414906_y9_1_ILIPALM(UniMod:35)VTAEK_2	-1	7759.3	101409_ILIPALM(UniMod:35)VTAEK_2	0	ILIPALMVTAEK	y9/0.002	ILIPALM(UniMod:35)VTAEK	2	101409_ILIPALM(UniMod:35)VTAEK_2	1/P34913	1	y	9	light
1/P34913	657.889	488.263	70.9	1414900_y9_2_ILIPALM(UniMod:35)VTAEK_2	-1	5081	101409_ILIPALM(UniMod:35)VTAEK_2	0	ILIPALMVTAEK	y9^2/0.004	ILIPALM(UniMod:35)VTAEK	2	101409_ILIPALM(UniMod:35)VTAEK_2	1/P34913	2	y	9	light
1/P34913	657.889	547.309	70.9	1414902_y5_1_ILIPALM(UniMod:35)VTAEK_2	-1	1034.3	101409_ILIPALM(UniMod:35)VTAEK_2	0	ILIPALMVTAEK	y5/0.003	ILIPALM(UniMod:35)VTAEK	2	101409_ILIPALM(UniMod:35)VTAEK_2	1/P34913	1	y	5	light
1/P34913	657.889	544.805	70.9	1414901_y10_2_ILIPALM(UniMod:35)VTAEK_2	-1	1501.6	101409_ILIPALM(UniMod:35)VTAEK_2	0	ILIPALMVTAEK	y10^2/0.009	ILIPALM(UniMod:35)VTAEK	2	101409_ILIPALM(UniMod:35)VTAEK_2	1/P34913	2	y	10	light
1/P34913	657.889	878.465	70.9	1414904_y8_1_ILIPALM(UniMod:35)VTAEK_2	-1	1026.3	101409_ILIPALM(UniMod:35)VTAEK_2	0	ILIPALMVTAEK	y8/0.006	ILIPALM(UniMod:35)VTAEK	2	101409_ILIPALM(UniMod:35)VTAEK_2	1/P34913	1	y	8	light
1/P34913	657.889	448.24	70.9	1414899_y4_1_ILIPALM(UniMod:35)VTAEK_2	-1	821.4	101409_ILIPALM(UniMod:35)VTAEK_2	0	ILIPALMVTAEK	y4/0.007	ILIPALM(UniMod:35)VTAEK	2	101409_ILIPALM(UniMod:35)VTAEK_2	1/P34913	1	y	4	light
1/Q4J6C6	662.353	728.373	95.3	97658_b6_1_HSNLLYVNVIGLADDSVR_3	-1	3689	10143_HSNLLYVNVIGLADDSVR_3	0	HSNLLYVNVIGLADDSVR	b6/0.013	HSNLLYVNVIGLADDSVR	3	10143_HSNLLYVNVIGLADDSVR_3	1/Q4J6C6	1	b	6	light
1/Q4J6C6	662.353	832.416	95.3	97660_y8_1_HSNLLYVNVIGLADDSVR_3	-1	10000	10143_HSNLLYVNVIGLADDSVR_3	0	HSNLLYVNVIGLADDSVR	y8/0.009	HSNLLYVNVIGLADDSVR	3	10143_HSNLLYVNVIGLADDSVR_3	1/Q4J6C6	1	y	8	light
1/Q4J6C6	662.353	476.246	95.3	97654_y4_1_HSNLLYVNVIGLADDSVR_3	-1	1614.4	10143_HSNLLYVNVIGLADDSVR_3	0	HSNLLYVNVIGLADDSVR	y4/0.005	HSNLLYVNVIGLADDSVR	3	10143_HSNLLYVNVIGLADDSVR_3	1/Q4J6C6	1	y	4	light
1/Q4J6C6	662.353	591.273	95.3	97656_y5_1_HSNLLYVNVIGLADDSVR_3	-1	3608.7	10143_HSNLLYVNVIGLADDSVR_3	0	HSNLLYVNVIGLADDSVR	y5/0.008	HSNLLYVNVIGLADDSVR	3	10143_HSNLLYVNVIGLADDSVR_3	1/Q4J6C6	1	y	5	light
1/Q4J6C6	662.353	827.441	95.3	97659_b7_1_HSNLLYVNVIGLADDSVR_3	-1	2564.1	10143_HSNLLYVNVIGLADDSVR_3	0	HSNLLYVNVIGLADDSVR	b7/0.016	HSNLLYVNVIGLADDSVR	3	10143_HSNLLYVNVIGLADDSVR_3	1/Q4J6C6	1	b	7	light
1/Q4J6C6	662.353	565.309	95.3	97655_b5_1_HSNLLYVNVIGLADDSVR_3	-1	3513.8	10143_HSNLLYVNVIGLADDSVR_3	0	HSNLLYVNVIGLADDSVR	b5/0.010	HSNLLYVNVIGLADDSVR	3	10143_HSNLLYVNVIGLADDSVR_3	1/Q4J6C6	1	b	5	light
1/Q8NCC3	628.351	742.461	61.1	98278_b7_1_HPPVVLVPGDLGNQLEAK_3	-1	6280.8	10150_HPPVVLVPGDLGNQLEAK_3	0	HPPVVLVPGDLGNQLEAK	b7/-0.005	HPPVVLVPGDLGNQLEAK	3	10150_HPPVVLVPGDLGNQLEAK_3	1/Q8NCC3	1	b	7	light
1/Q8NCC3	628.351	1044.53	61.1	98283_y10_1_HPPVVLVPGDLGNQLEAK_3	-1	2192.7	10150_HPPVVLVPGDLGNQLEAK_3	0	HPPVVLVPGDLGNQLEAK	y10/0.001	HPPVVLVPGDLGNQLEAK	3	10150_HPPVVLVPGDLGNQLEAK_3	1/Q8NCC3	1	y	10	light
1/Q8NCC3	628.351	1141.58	61.1	98285_y11_1_HPPVVLVPGDLGNQLEAK_3	-1	2764.1	10150_HPPVVLVPGDLGNQLEAK_3	0	HPPVVLVPGDLGNQLEAK	y11/-0.002	HPPVVLVPGDLGNQLEAK	3	10150_HPPVVLVPGDLGNQLEAK_3	1/Q8NCC3	1	y	11	light
1/Q8NCC3	628.351	759.4	61.1	98280_y7_1_HPPVVLVPGDLGNQLEAK_3	-1	2885	10150_HPPVVLVPGDLGNQLEAK_3	0	HPPVVLVPGDLGNQLEAK	y7/0.006	HPPVVLVPGDLGNQLEAK	3	10150_HPPVVLVPGDLGNQLEAK_3	1/Q8NCC3	1	y	7	light
1/Q8NCC3	628.351	571.296	61.1	98274_y11_2_HPPVVLVPGDLGNQLEAK_3	-1	10000	10150_HPPVVLVPGDLGNQLEAK_3	0	HPPVVLVPGDLGNQLEAK	y11^2/-0.001,y5-17/-0.013	HPPVVLVPGDLGNQLEAK	3	10150_HPPVVLVPGDLGNQLEAK_3	1/Q8NCC3	2	y	11	light
1/Q8NCC3	628.351	643.393	61.1	98275_b6_1_HPPVVLVPGDLGNQLEAK_3	-1	3817.5	10150_HPPVVLVPGDLGNQLEAK_3	0	HPPVVLVPGDLGNQLEAK	b6/0.004	HPPVVLVPGDLGNQLEAK	3	10150_HPPVVLVPGDLGNQLEAK_3	1/Q8NCC3	1	b	6	light
1/Q86WA8	487.906	641.296	24.7	1416180_y5_1_ILLDNDHYAMEK_3	-1	1634.9	101504_ILLDNDHYAMEK_3	0	ILLDNDHYAMEK	y5/-0.009	ILLDNDHYAMEK	3	101504_ILLDNDHYAMEK_3	1/Q86WA8	1	y	5	light
1/Q86WA8	487.906	1122.45	24.7	1416183_y9_1_ILLDNDHYAMEK_3	-1	2331.3	101504_ILLDNDHYAMEK_3	0	ILLDNDHYAMEK	y9/-0.018	ILLDNDHYAMEK	3	101504_ILLDNDHYAMEK_3	1/Q86WA8	1	y	9	light
1/Q86WA8	487.906	561.73	24.7	1416178_y9_2_ILLDNDHYAMEK_3	-1	3070.6	101504_ILLDNDHYAMEK_3	0	ILLDNDHYAMEK	y9^2/-0.003	ILLDNDHYAMEK	3	101504_ILLDNDHYAMEK_3	1/Q86WA8	2	y	9	light
1/Q86WA8	487.906	778.355	24.7	1416182_y6_1_ILLDNDHYAMEK_3	-1	1362.4	101504_ILLDNDHYAMEK_3	0	ILLDNDHYAMEK	y6/0.006	ILLDNDHYAMEK	3	101504_ILLDNDHYAMEK_3	1/Q86WA8	1	y	6	light
1/Q86WA8	487.906	618.272	24.7	1416179_y10_2_ILLDNDHYAMEK_3	-1	7193.5	101504_ILLDNDHYAMEK_3	0	ILLDNDHYAMEK	y10^2/0.011	ILLDNDHYAMEK	3	101504_ILLDNDHYAMEK_3	1/Q86WA8	2	y	10	light
1/Q86WA8	487.906	674.814	24.7	1416181_y11_2_ILLDNDHYAMEK_3	-1	6021.8	101504_ILLDNDHYAMEK_3	0	ILLDNDHYAMEK	y11^2/0.002	ILLDNDHYAMEK	3	101504_ILLDNDHYAMEK_3	1/Q86WA8	2	y	11	light
1/Q9UN36	791.663	889.514	78.1	1416212_y8_1_ILLDQGQTHSVETPYGSVTFTVYGTPKPK_4	-1	2029.8	101507_ILLDQGQTHSVETPYGSVTFTVYGTPKPK_4	0	ILLDQGQTHSVETPYGSVTFTVYGTPKPK	y8/0.005	ILLDQGQTHSVETPYGSVTFTVYGTPKPK	4	101507_ILLDQGQTHSVETPYGSVTFTVYGTPKPK_4	1/Q9UN36	1	y	8	light
1/Q9UN36	791.663	469.313	78.1	1416206_y4_1_ILLDQGQTHSVETPYGSVTFTVYGTPKPK_4	-1	2953.6	101507_ILLDQGQTHSVETPYGSVTFTVYGTPKPK_4	0	ILLDQGQTHSVETPYGSVTFTVYGTPKPK	y4/0.005	ILLDQGQTHSVETPYGSVTFTVYGTPKPK	4	101507_ILLDQGQTHSVETPYGSVTFTVYGTPKPK_4	1/Q9UN36	1	y	4	light
1/Q9UN36	791.663	990.562	78.1	1416213_y9_1_ILLDQGQTHSVETPYGSVTFTVYGTPKPK_4	-1	1381.7	101507_ILLDQGQTHSVETPYGSVTFTVYGTPKPK_4	0	ILLDQGQTHSVETPYGSVTFTVYGTPKPK	y9/0.003	ILLDQGQTHSVETPYGSVTFTVYGTPKPK	4	101507_ILLDQGQTHSVETPYGSVTFTVYGTPKPK_4	1/Q9UN36	1	y	9	light
1/Q9UN36	791.663	1137.63	78.1	1416214_y10_1_ILLDQGQTHSVETPYGSVTFTVYGTPKPK_4	-1	1483.1	101507_ILLDQGQTHSVETPYGSVTFTVYGTPKPK_4	0	ILLDQGQTHSVETPYGSVTFTVYGTPKPK	y10/-0.004	ILLDQGQTHSVETPYGSVTFTVYGTPKPK	4	101507_ILLDQGQTHSVETPYGSVTFTVYGTPKPK_4	1/Q9UN36	1	y	10	light
1/Q9UN36	791.663	627.382	78.1	1416208_y6_1_ILLDQGQTHSVETPYGSVTFTVYGTPKPK_4	-1	1408.6	101507_ILLDQGQTHSVETPYGSVTFTVYGTPKPK_4	0	ILLDQGQTHSVETPYGSVTFTVYGTPKPK	y6/0.009	ILLDQGQTHSVETPYGSVTFTVYGTPKPK	4	101507_ILLDQGQTHSVETPYGSVTFTVYGTPKPK_4	1/Q9UN36	1	y	6	light
1/Q9UN36	791.663	1238.68	78.1	1416215_y11_1_ILLDQGQTHSVETPYGSVTFTVYGTPKPK_4	-1	1838	101507_ILLDQGQTHSVETPYGSVTFTVYGTPKPK_4	0	ILLDQGQTHSVETPYGSVTFTVYGTPKPK	y11/0.016	ILLDQGQTHSVETPYGSVTFTVYGTPKPK	4	101507_ILLDQGQTHSVETPYGSVTFTVYGTPKPK_4	1/Q9UN36	1	y	11	light
1/P60900	643.367	744.44	55	1554346_KVPDKLLDSSTVTHLFK_3	-1	1307.6	101508_KVPDKLLDSSTVTHLFK_3	0	KVPDKLLDSSTVTHLFK	y6/-0.017	KVPDKLLDSSTVTHLFK	3	101508_KVPDKLLDSSTVTHLFK_3	1/P60900	1	y	-1	light
1/P60900	643.367	1134.58	55	1554353_KVPDKLLDSSTVTHLFK_3	-1	1000.5	101508_KVPDKLLDSSTVTHLFK_3	0	KVPDKLLDSSTVTHLFK	y10/-0.008	KVPDKLLDSSTVTHLFK	3	101508_KVPDKLLDSSTVTHLFK_3	1/P60900	1	y	-1	light
1/P60900	643.367	850.965	55	1554349_KVPDKLLDSSTVTHLFK_3	-1	4410.6	101508_KVPDKLLDSSTVTHLFK_3	0	KVPDKLLDSSTVTHLFK	y15^2/-0.005	KVPDKLLDSSTVTHLFK	3	101508_KVPDKLLDSSTVTHLFK_3	1/P60900	2	y	-1	light
1/P60900	643.367	1247.66	55	1554354_KVPDKLLDSSTVTHLFK_3	-1	648.1	101508_KVPDKLLDSSTVTHLFK_3	0	KVPDKLLDSSTVTHLFK	y11/-0.004	KVPDKLLDSSTVTHLFK	3	101508_KVPDKLLDSSTVTHLFK_3	1/P60900	1	y	-1	light
1/P60900	643.367	407.265	55	1554342_KVPDKLLDSSTVTHLFK_3	-1	648.3	101508_KVPDKLLDSSTVTHLFK_3	0	KVPDKLLDSSTVTHLFK	y3/-0.001	KVPDKLLDSSTVTHLFK	3	101508_KVPDKLLDSSTVTHLFK_3	1/P60900	1	y	-1	light
1/P60900	643.367	1019.55	55	1554352_KVPDKLLDSSTVTHLFK_3	-1	676.4	101508_KVPDKLLDSSTVTHLFK_3	0	KVPDKLLDSSTVTHLFK	y9/0.005	KVPDKLLDSSTVTHLFK	3	101508_KVPDKLLDSSTVTHLFK_3	1/P60900	1	y	-1	light
1/P60900	482.777	744.44	55.8	1554364_KVPDKLLDSSTVTHLFK_4	-1	912.2	101509_KVPDKLLDSSTVTHLFK_4	0	KVPDKLLDSSTVTHLFK	y6/0.004	KVPDKLLDSSTVTHLFK	4	101509_KVPDKLLDSSTVTHLFK_4	1/P60900	1	y	-1	light
1/P60900	482.777	845.488	55.8	1554365_KVPDKLLDSSTVTHLFK_4	-1	470.4	101509_KVPDKLLDSSTVTHLFK_4	0	KVPDKLLDSSTVTHLFK	y7/-0.006	KVPDKLLDSSTVTHLFK	4	101509_KVPDKLLDSSTVTHLFK_4	1/P60900	1	y	-1	light
1/P60900	482.777	645.372	55.8	1554362_KVPDKLLDSSTVTHLFK_4	-1	1922.1	101509_KVPDKLLDSSTVTHLFK_4	0	KVPDKLLDSSTVTHLFK	y5/-0.005	KVPDKLLDSSTVTHLFK	4	101509_KVPDKLLDSSTVTHLFK_4	1/P60900	1	y	-1	light
1/P60900	482.777	624.335	55.8	1554361_KVPDKLLDSSTVTHLFK_4	-1	567.3	101509_KVPDKLLDSSTVTHLFK_4	0	KVPDKLLDSSTVTHLFK	y11^2/-0.004	KVPDKLLDSSTVTHLFK	4	101509_KVPDKLLDSSTVTHLFK_4	1/P60900	2	y	-1	light
1/P60900	482.777	407.265	55.8	1554356_KVPDKLLDSSTVTHLFK_4	-1	756.2	101509_KVPDKLLDSSTVTHLFK_4	0	KVPDKLLDSSTVTHLFK	y3/0.004	KVPDKLLDSSTVTHLFK	4	101509_KVPDKLLDSSTVTHLFK_4	1/P60900	1	y	-1	light
1/P60900	482.777	544.324	55.8	1554359_KVPDKLLDSSTVTHLFK_4	-1	805.2	101509_KVPDKLLDSSTVTHLFK_4	0	KVPDKLLDSSTVTHLFK	y4/-0.001	KVPDKLLDSSTVTHLFK	4	101509_KVPDKLLDSSTVTHLFK_4	1/P60900	1	y	-1	light
1/P08311	471.731	417.22	-46.2	98296_y3_1_HPQYNQR_2	-1	130	10152_HPQYNQR_2	0	HPQYNQR	y3/-0.001	HPQYNQR	2	10152_HPQYNQR_2	1/P08311	1	y	3	light
1/P08311	471.731	768.342	-46.2	98299_b6_1_HPQYNQR_2	-1	36.2	10152_HPQYNQR_2	0	HPQYNQR	b6/0.005	HPQYNQR	2	10152_HPQYNQR_2	1/P08311	1	b	6	light
1/P08311	471.731	805.395	-46.2	98300_y6_1_HPQYNQR_2	-1	2273.2	10152_HPQYNQR_2	0	HPQYNQR	y6/0.001	HPQYNQR	2	10152_HPQYNQR_2	1/P08311	1	y	6	light
1/P08311	471.731	403.201	-46.2	98295_y6_2_HPQYNQR_2	-1	1110.1	10152_HPQYNQR_2	0	HPQYNQR	y6^2/0.002	HPQYNQR	2	10152_HPQYNQR_2	1/P08311	2	y	6	light
1/P08311	471.731	580.284	-46.2	98297_y4_1_HPQYNQR_2	-1	1080.6	10152_HPQYNQR_2	0	HPQYNQR	y4/0.002	HPQYNQR	2	10152_HPQYNQR_2	1/P08311	1	y	4	light
1/P08311	471.731	708.342	-46.2	98298_y5_1_HPQYNQR_2	-1	1161.9	10152_HPQYNQR_2	0	HPQYNQR	y5/0.000	HPQYNQR	2	10152_HPQYNQR_2	1/P08311	1	y	5	light
1/Q86TI2	782.086	708.368	86.1	98366_y6_1_HPTVLFVYGGPQVQLVNNSFK_3	-1	7978.7	10157_HPTVLFVYGGPQVQLVNNSFK_3	0	HPTVLFVYGGPQVQLVNNSFK	y6/-0.002	HPTVLFVYGGPQVQLVNNSFK	3	10157_HPTVLFVYGGPQVQLVNNSFK_3	1/Q86TI2	1	y	6	light
1/Q86TI2	782.086	637.349	86.1	98360_y11_2_HPTVLFVYGGPQVQLVNNSFK_3	-1	8085.1	10157_HPTVLFVYGGPQVQLVNNSFK_3	0	HPTVLFVYGGPQVQLVNNSFK	y11^2/0.003,y17^3/0.008,m5:10/0.017	HPTVLFVYGGPQVQLVNNSFK	3	10157_HPTVLFVYGGPQVQLVNNSFK_3	1/Q86TI2	2	y	11	light
1/Q86TI2	782.086	609.299	86.1	98359_y5_1_HPTVLFVYGGPQVQLVNNSFK_3	-1	7446.8	10157_HPTVLFVYGGPQVQLVNNSFK_3	0	HPTVLFVYGGPQVQLVNNSFK	y5/0.002	HPTVLFVYGGPQVQLVNNSFK	3	10157_HPTVLFVYGGPQVQLVNNSFK_3	1/Q86TI2	1	y	5	light
1/Q86TI2	782.086	821.452	86.1	98372_y7_1_HPTVLFVYGGPQVQLVNNSFK_3	-1	8297.9	10157_HPTVLFVYGGPQVQLVNNSFK_3	0	HPTVLFVYGGPQVQLVNNSFK	y7/-0.000	HPTVLFVYGGPQVQLVNNSFK	3	10157_HPTVLFVYGGPQVQLVNNSFK_3	1/Q86TI2	1	y	7	light
1/Q86TI2	782.086	794.456	86.1	98368_b7_1_HPTVLFVYGGPQVQLVNNSFK_3	-1	7874.3	10157_HPTVLFVYGGPQVQLVNNSFK_3	0	HPTVLFVYGGPQVQLVNNSFK	b7/-0.013	HPTVLFVYGGPQVQLVNNSFK	3	10157_HPTVLFVYGGPQVQLVNNSFK_3	1/Q86TI2	1	b	7	light
1/Q86TI2	782.086	1071.56	86.1	98378_b10_1_HPTVLFVYGGPQVQLVNNSFK_3	-1	7766	10157_HPTVLFVYGGPQVQLVNNSFK_3	0	HPTVLFVYGGPQVQLVNNSFK	b10/-0.002	HPTVLFVYGGPQVQLVNNSFK	3	10157_HPTVLFVYGGPQVQLVNNSFK_3	1/Q86TI2	1	b	10	light
1/Q9HAT2	815.396	829.33	107.6	10129_b7_1_AHSDTWMVVLDPM(UniMod:35)KPGGPFEVMAQQTLEK_4	-1	9166.7	1016_AHSDTWMVVLDPM(UniMod:35)KPGGPFEVMAQQTLEK_4	0	AHSDTWMVVLDPMKPGGPFEVMAQQTLEK	b7/-0.004	AHSDTWMVVLDPM(UniMod:35)KPGGPFEVMAQQTLEK	4	1016_AHSDTWMVVLDPM(UniMod:35)KPGGPFEVMAQQTLEK_4	1/Q9HAT2	1	b	7	light
1/Q9HAT2	815.396	411.162	107.6	10126_b4_1_AHSDTWMVVLDPM(UniMod:35)KPGGPFEVMAQQTLEK_4	-1	3333.3	1016_AHSDTWMVVLDPM(UniMod:35)KPGGPFEVMAQQTLEK_4	0	AHSDTWMVVLDPMKPGGPFEVMAQQTLEK	b4/0.012	AHSDTWMVVLDPM(UniMod:35)KPGGPFEVMAQQTLEK	4	1016_AHSDTWMVVLDPM(UniMod:35)KPGGPFEVMAQQTLEK_4	1/Q9HAT2	1	b	4	light
1/Q9HAT2	815.396	1116.56	107.6	10131_y20_2_AHSDTWMVVLDPM(UniMod:35)KPGGPFEVMAQQTLEK_4	-1	2916.7	1016_AHSDTWMVVLDPM(UniMod:35)KPGGPFEVMAQQTLEK_4	0	AHSDTWMVVLDPMKPGGPFEVMAQQTLEK	y20^2/-0.004	AHSDTWMVVLDPM(UniMod:35)KPGGPFEVMAQQTLEK	4	1016_AHSDTWMVVLDPM(UniMod:35)KPGGPFEVMAQQTLEK_4	1/Q9HAT2	2	y	20	light
1/Q9HAT2	815.396	490.287	107.6	10127_y4_1_AHSDTWMVVLDPM(UniMod:35)KPGGPFEVMAQQTLEK_4	-1	2500	1016_AHSDTWMVVLDPM(UniMod:35)KPGGPFEVMAQQTLEK_4	0	AHSDTWMVVLDPMKPGGPFEVMAQQTLEK	y4/-0.001	AHSDTWMVVLDPM(UniMod:35)KPGGPFEVMAQQTLEK	4	1016_AHSDTWMVVLDPM(UniMod:35)KPGGPFEVMAQQTLEK_4	1/Q9HAT2	1	y	4	light
1/Q9HAT2	815.396	1027.47	107.6	10130_b9_1_AHSDTWMVVLDPM(UniMod:35)KPGGPFEVMAQQTLEK_4	-1	2500	1016_AHSDTWMVVLDPM(UniMod:35)KPGGPFEVMAQQTLEK_4	0	AHSDTWMVVLDPMKPGGPFEVMAQQTLEK	b9/-0.003	AHSDTWMVVLDPM(UniMod:35)KPGGPFEVMAQQTLEK	4	1016_AHSDTWMVVLDPM(UniMod:35)KPGGPFEVMAQQTLEK_4	1/Q9HAT2	1	b	9	light
1/Q9HAT2	815.396	1140.55	107.6	10132_b10_1_AHSDTWMVVLDPM(UniMod:35)KPGGPFEVMAQQTLEK_4	-1	2500	1016_AHSDTWMVVLDPM(UniMod:35)KPGGPFEVMAQQTLEK_4	0	AHSDTWMVVLDPMKPGGPFEVMAQQTLEK	b10/0.014,y10-36/-0.007	AHSDTWMVVLDPM(UniMod:35)KPGGPFEVMAQQTLEK	4	1016_AHSDTWMVVLDPM(UniMod:35)KPGGPFEVMAQQTLEK_4	1/Q9HAT2	1	b	10	light
1/Q86WA6	657.714	1100.57	115.1	1556387_KVSLLGWSDGGITALIAAAK_3	-1	3434.2	101626_KVSLLGWSDGGITALIAAAK_3	0	KVSLLGWSDGGITALIAAAK	[b11/0.015]	KVSLLGWSDGGITALIAAAK	3	101626_KVSLLGWSDGGITALIAAAK_3	1/Q86WA6	1	b	-1	light
1/Q86WA6	657.714	541.371	115.1	1556367_KVSLLGWSDGGITALIAAAK_3	-1	2209	101626_KVSLLGWSDGGITALIAAAK_3	0	KVSLLGWSDGGITALIAAAK	b5/-0.001	KVSLLGWSDGGITALIAAAK	3	101626_KVSLLGWSDGGITALIAAAK_3	1/Q86WA6	1	b	-1	light
1/Q86WA6	657.714	360.224	115.1	1556361_KVSLLGWSDGGITALIAAAK_3	-1	2850.6	101626_KVSLLGWSDGGITALIAAAK_3	0	KVSLLGWSDGGITALIAAAK	y4/0.002	KVSLLGWSDGGITALIAAAK	3	101626_KVSLLGWSDGGITALIAAAK_3	1/Q86WA6	1	y	-1	light
1/Q86WA6	657.714	586.392	115.1	1556369_KVSLLGWSDGGITALIAAAK_3	-1	5395.5	101626_KVSLLGWSDGGITALIAAAK_3	0	KVSLLGWSDGGITALIAAAK	y6/0.006	KVSLLGWSDGGITALIAAAK	3	101626_KVSLLGWSDGGITALIAAAK_3	1/Q86WA6	1	y	-1	light
1/Q86WA6	657.714	758.477	115.1	1556375_KVSLLGWSDGGITALIAAAK_3	-1	9969.9	101626_KVSLLGWSDGGITALIAAAK_3	0	KVSLLGWSDGGITALIAAAK	y8/-0.004	KVSLLGWSDGGITALIAAAK	3	101626_KVSLLGWSDGGITALIAAAK_3	1/Q86WA6	1	y	-1	light
1/Q86WA6	657.714	473.308	115.1	1556366_KVSLLGWSDGGITALIAAAK_3	-1	4570.8	101626_KVSLLGWSDGGITALIAAAK_3	0	KVSLLGWSDGGITALIAAAK	y5/0.007	KVSLLGWSDGGITALIAAAK	3	101626_KVSLLGWSDGGITALIAAAK_3	1/Q86WA6	1	y	-1	light
1/P02787	637.33	1049.56	22.9	97888_y9_1_HSTIFENLANK_2	-1	3270.4	10164_HSTIFENLANK_2	0	HSTIFENLANK	y9/-0.002	HSTIFENLANK	2	10164_HSTIFENLANK_2	1/P02787	1	y	9	light
1/P02787	637.33	829.384	22.9	97883_b7_1_HSTIFENLANK_2	-1	2405.8	10164_HSTIFENLANK_2	0	HSTIFENLANK	b7/-0.001	HSTIFENLANK	2	10164_HSTIFENLANK_2	1/P02787	1	b	7	light
1/P02787	637.33	835.431	22.9	97884_y7_1_HSTIFENLANK_2	-1	1912.1	10164_HSTIFENLANK_2	0	HSTIFENLANK	y7/-0.001	HSTIFENLANK	2	10164_HSTIFENLANK_2	1/P02787	1	y	7	light
1/P02787	637.33	1136.59	22.9	97890_y10_1_HSTIFENLANK_2	-1	3079.2	10164_HSTIFENLANK_2	0	HSTIFENLANK	y10/-0.001	HSTIFENLANK	2	10164_HSTIFENLANK_2	1/P02787	1	y	10	light
1/P02787	637.33	715.341	22.9	97882_b6_1_HSTIFENLANK_2	-1	1202.9	10164_HSTIFENLANK_2	0	HSTIFENLANK	b6/0.001	HSTIFENLANK	2	10164_HSTIFENLANK_2	1/P02787	1	b	6	light
1/P02787	637.33	439.23	22.9	97877_b4_1_HSTIFENLANK_2	-1	1326.3	10164_HSTIFENLANK_2	0	HSTIFENLANK	b4/0.002	HSTIFENLANK	2	10164_HSTIFENLANK_2	1/P02787	1	b	4	light
1/P02787	425.223	829.384	24.2	97898_b7_1_HSTIFENLANK_3	-1	3136.7	10165_HSTIFENLANK_3	0	HSTIFENLANK	b7/0.001	HSTIFENLANK	3	10165_HSTIFENLANK_3	1/P02787	1	b	7	light
1/P02787	425.223	586.298	24.2	97895_b5_1_HSTIFENLANK_3	-1	4549.7	10165_HSTIFENLANK_3	0	HSTIFENLANK	b5/0.004	HSTIFENLANK	3	10165_HSTIFENLANK_3	1/P02787	1	b	5	light
1/P02787	425.223	559.32	24.2	97894_y5_1_HSTIFENLANK_3	-1	5315.6	10165_HSTIFENLANK_3	0	HSTIFENLANK	y5/0.004	HSTIFENLANK	3	10165_HSTIFENLANK_3	1/P02787	1	y	5	light
1/P02787	425.223	445.277	24.2	97893_y4_1_HSTIFENLANK_3	-1	2512.8	10165_HSTIFENLANK_3	0	HSTIFENLANK	y4/0.002	HSTIFENLANK	3	10165_HSTIFENLANK_3	1/P02787	1	y	4	light
1/P02787	425.223	439.23	24.2	97892_b4_1_HSTIFENLANK_3	-1	10000	10165_HSTIFENLANK_3	0	HSTIFENLANK	b4/0.002	HSTIFENLANK	3	10165_HSTIFENLANK_3	1/P02787	1	b	4	light
1/P02787	425.223	688.362	24.2	97896_y6_1_HSTIFENLANK_3	-1	3370.6	10165_HSTIFENLANK_3	0	HSTIFENLANK	y6/0.003	HSTIFENLANK	3	10165_HSTIFENLANK_3	1/P02787	1	y	6	light
1/P02787	539.278	829.384	27.4	97908_b7_1_HSTIFENLANKADR_3	-1	4485.3	10166_HSTIFENLANKADR_3	0	HSTIFENLANKADR	b7/0.008	HSTIFENLANKADR	3	10166_HSTIFENLANKADR_3	1/P02787	1	b	7	light
1/P02787	539.278	603.321	27.4	97904_y5_1_HSTIFENLANKADR_3	-1	5463.2	10166_HSTIFENLANKADR_3	0	HSTIFENLANKADR	y5/0.005	HSTIFENLANKADR	3	10166_HSTIFENLANKADR_3	1/P02787	1	y	5	light
1/P02787	539.278	674.358	27.4	97905_y6_1_HSTIFENLANKADR_3	-1	7416.5	10166_HSTIFENLANKADR_3	0	HSTIFENLANKADR	y6/0.001,y12-44^2/-0.013	HSTIFENLANKADR	3	10166_HSTIFENLANKADR_3	1/P02787	1	y	6	light
1/P02787	539.278	361.183	27.4	97900_y3_1_HSTIFENLANKADR_3	-1	2574.4	10166_HSTIFENLANKADR_3	0	HSTIFENLANKADR	y3/-0.005,b10-46^3/-0.007	HSTIFENLANKADR	3	10166_HSTIFENLANKADR_3	1/P02787	1	y	3	light
1/P02787	539.278	439.23	27.4	97901_b4_1_HSTIFENLANKADR_3	-1	2431.9	10166_HSTIFENLANKADR_3	0	HSTIFENLANKADR	b4/0.002	HSTIFENLANKADR	3	10166_HSTIFENLANKADR_3	1/P02787	1	b	4	light
1/P02787	539.278	586.298	27.4	97903_b5_1_HSTIFENLANKADR_3	-1	3561.1	10166_HSTIFENLANKADR_3	0	HSTIFENLANKADR	b5/0.001,y5-17/0.005	HSTIFENLANKADR	3	10166_HSTIFENLANKADR_3	1/P02787	1	b	5	light
1/P02787	784.883	778.351	81.3	97920_y6_1_HSTIFENLANKADRDQYELLC(UniMod:4)LDNTR_4	-1	10000	10167_HSTIFENLANKADRDQYELLC(UniMod:4)LDNTR_4	0	HSTIFENLANKADRDQYELLCLDNTR	y6/-0.001	HSTIFENLANKADRDQYELLC(UniMod:4)LDNTR	4	10167_HSTIFENLANKADRDQYELLC(UniMod:4)LDNTR_4	1/P02787	1	y	6	light
1/P02787	784.883	829.384	81.3	97921_b7_1_HSTIFENLANKADRDQYELLC(UniMod:4)LDNTR_4	-1	4975.3	10167_HSTIFENLANKADRDQYELLC(UniMod:4)LDNTR_4	0	HSTIFENLANKADRDQYELLCLDNTR	b7/-0.001	HSTIFENLANKADRDQYELLC(UniMod:4)LDNTR	4	10167_HSTIFENLANKADRDQYELLC(UniMod:4)LDNTR_4	1/P02787	1	b	7	light
1/P02787	784.883	618.321	81.3	97918_y5_1_HSTIFENLANKADRDQYELLC(UniMod:4)LDNTR_4	-1	4619.2	10167_HSTIFENLANKADRDQYELLC(UniMod:4)LDNTR_4	0	HSTIFENLANKADRDQYELLCLDNTR	y5/-0.002	HSTIFENLANKADRDQYELLC(UniMod:4)LDNTR	4	10167_HSTIFENLANKADRDQYELLC(UniMod:4)LDNTR_4	1/P02787	1	y	5	light
1/P02787	784.883	390.21	81.3	97914_y3_1_HSTIFENLANKADRDQYELLC(UniMod:4)LDNTR_4	-1	7512	10167_HSTIFENLANKADRDQYELLC(UniMod:4)LDNTR_4	0	HSTIFENLANKADRDQYELLCLDNTR	y3/0.001,m4:6/0.008	HSTIFENLANKADRDQYELLC(UniMod:4)LDNTR	4	10167_HSTIFENLANKADRDQYELLC(UniMod:4)LDNTR_4	1/P02787	1	y	3	light
1/P02787	784.883	505.237	81.3	97916_y4_1_HSTIFENLANKADRDQYELLC(UniMod:4)LDNTR_4	-1	3592.8	10167_HSTIFENLANKADRDQYELLC(UniMod:4)LDNTR_4	0	HSTIFENLANKADRDQYELLCLDNTR	y4/0.004	HSTIFENLANKADRDQYELLC(UniMod:4)LDNTR	4	10167_HSTIFENLANKADRDQYELLC(UniMod:4)LDNTR_4	1/P02787	1	y	4	light
1/P02787	784.883	891.435	81.3	97922_y7_1_HSTIFENLANKADRDQYELLC(UniMod:4)LDNTR_4	-1	5176.1	10167_HSTIFENLANKADRDQYELLC(UniMod:4)LDNTR_4	0	HSTIFENLANKADRDQYELLCLDNTR	y7/0.003	HSTIFENLANKADRDQYELLC(UniMod:4)LDNTR	4	10167_HSTIFENLANKADRDQYELLC(UniMod:4)LDNTR_4	1/P02787	1	y	7	light
1/P27487	563.93	765.414	39.1	97940_y6_1_HSYTASYDIYDLNK_3	-1	5764.5	10169_HSYTASYDIYDLNK_3	0	HSYTASYDIYDLNK	y6/0.012	HSYTASYDIYDLNK	3	10169_HSYTASYDIYDLNK_3	1/P27487	1	y	6	light
1/P27487	563.93	560.246	39.1	97937_b5_1_HSYTASYDIYDLNK_3	-1	3334.6	10169_HSYTASYDIYDLNK_3	0	HSYTASYDIYDLNK	b5/0.008	HSYTASYDIYDLNK	3	10169_HSYTASYDIYDLNK_3	1/P27487	1	b	5	light
1/P27487	563.93	652.33	39.1	97939_y5_1_HSYTASYDIYDLNK_3	-1	10000	10169_HSYTASYDIYDLNK_3	0	HSYTASYDIYDLNK	y5/0.013	HSYTASYDIYDLNK	3	10169_HSYTASYDIYDLNK_3	1/P27487	1	y	5	light
1/P27487	563.93	880.441	39.1	97941_y7_1_HSYTASYDIYDLNK_3	-1	4931.6	10169_HSYTASYDIYDLNK_3	0	HSYTASYDIYDLNK	y7/-0.008	HSYTASYDIYDLNK	3	10169_HSYTASYDIYDLNK_3	1/P27487	1	y	7	light
1/P27487	563.93	489.267	39.1	97936_y4_1_HSYTASYDIYDLNK_3	-1	2836.2	10169_HSYTASYDIYDLNK_3	0	HSYTASYDIYDLNK	y4/-0.001	HSYTASYDIYDLNK	3	10169_HSYTASYDIYDLNK_3	1/P27487	1	y	4	light
1/P27487	563.93	647.278	39.1	97938_b6_1_HSYTASYDIYDLNK_3	-1	5109.3	10169_HSYTASYDIYDLNK_3	0	HSYTASYDIYDLNK	b6/0.003	HSYTASYDIYDLNK	3	10169_HSYTASYDIYDLNK_3	1/P27487	1	b	6	light
1/O00148	884.445	632.336	128.4	1418534_y5_1_ILNDVQDRFEVNVAELPEEIDISTYIEQSR_4	-1	4619	101690_ILNDVQDRFEVNVAELPEEIDISTYIEQSR_4	0	ILNDVQDRFEVNVAELPEEIDISTYIEQSR	y5/-0.011	ILNDVQDRFEVNVAELPEEIDISTYIEQSR	4	101690_ILNDVQDRFEVNVAELPEEIDISTYIEQSR_4	1/O00148	1	y	5	light
1/O00148	884.445	456.245	128.4	1418532_b4_1_ILNDVQDRFEVNVAELPEEIDISTYIEQSR_4	-1	3447	101690_ILNDVQDRFEVNVAELPEEIDISTYIEQSR_4	0	ILNDVQDRFEVNVAELPEEIDISTYIEQSR	b4/-0.013,b16-34^4/0.001	ILNDVQDRFEVNVAELPEEIDISTYIEQSR	4	101690_ILNDVQDRFEVNVAELPEEIDISTYIEQSR_4	1/O00148	1	b	4	light
1/O00148	884.445	795.4	128.4	1418536_y6_1_ILNDVQDRFEVNVAELPEEIDISTYIEQSR_4	-1	6000	101690_ILNDVQDRFEVNVAELPEEIDISTYIEQSR_4	0	ILNDVQDRFEVNVAELPEEIDISTYIEQSR	y6/-0.008	ILNDVQDRFEVNVAELPEEIDISTYIEQSR	4	101690_ILNDVQDRFEVNVAELPEEIDISTYIEQSR_4	1/O00148	1	y	6	light
1/O00148	884.445	519.252	128.4	1418533_y4_1_ILNDVQDRFEVNVAELPEEIDISTYIEQSR_4	-1	4333.4	101690_ILNDVQDRFEVNVAELPEEIDISTYIEQSR_4	0	ILNDVQDRFEVNVAELPEEIDISTYIEQSR	y4/-0.015	ILNDVQDRFEVNVAELPEEIDISTYIEQSR	4	101690_ILNDVQDRFEVNVAELPEEIDISTYIEQSR_4	1/O00148	1	y	4	light
1/O00148	884.445	983.479	128.4	1418540_y8_1_ILNDVQDRFEVNVAELPEEIDISTYIEQSR_4	-1	4571.4	101690_ILNDVQDRFEVNVAELPEEIDISTYIEQSR_4	0	ILNDVQDRFEVNVAELPEEIDISTYIEQSR	y8/0.009	ILNDVQDRFEVNVAELPEEIDISTYIEQSR	4	101690_ILNDVQDRFEVNVAELPEEIDISTYIEQSR_4	1/O00148	1	y	8	light
1/O00148	884.445	807.418	128.4	1418537_b14_2_ILNDVQDRFEVNVAELPEEIDISTYIEQSR_4	-1	3182.6	101690_ILNDVQDRFEVNVAELPEEIDISTYIEQSR_4	0	ILNDVQDRFEVNVAELPEEIDISTYIEQSR	b14^2/-0.018	ILNDVQDRFEVNVAELPEEIDISTYIEQSR	4	101690_ILNDVQDRFEVNVAELPEEIDISTYIEQSR_4	1/O00148	2	b	14	light
1/P27487	615.964	808.431	33.3	97950_y6_1_HSYTASYDIYDLNKR_3	-1	7741.3	10170_HSYTASYDIYDLNKR_3	0	HSYTASYDIYDLNKR	y6/0.007	HSYTASYDIYDLNKR	3	10170_HSYTASYDIYDLNKR_3	1/P27487	1	y	6	light
1/P27487	615.964	560.246	33.3	97947_b5_1_HSYTASYDIYDLNKR_3	-1	2331.5	10170_HSYTASYDIYDLNKR_3	0	HSYTASYDIYDLNKR	b5/0.008	HSYTASYDIYDLNKR	3	10170_HSYTASYDIYDLNKR_3	1/P27487	1	b	5	light
1/P27487	615.964	530.341	33.3	97946_y4_1_HSYTASYDIYDLNKR_3	-1	5768.5	10170_HSYTASYDIYDLNKR_3	0	HSYTASYDIYDLNKR	y4/0.002	HSYTASYDIYDLNKR	3	10170_HSYTASYDIYDLNKR_3	1/P27487	1	y	4	light
1/P27487	615.964	925.369	33.3	97953_b8_1_HSYTASYDIYDLNKR_3	-1	5660.7	10170_HSYTASYDIYDLNKR_3	0	HSYTASYDIYDLNKR	b8/0.019	HSYTASYDIYDLNKR	3	10170_HSYTASYDIYDLNKR_3	1/P27487	1	b	8	light
1/P27487	615.964	645.368	33.3	97948_y5_1_HSYTASYDIYDLNKR_3	-1	4773.2	10170_HSYTASYDIYDLNKR_3	0	HSYTASYDIYDLNKR	y5/0.011	HSYTASYDIYDLNKR	3	10170_HSYTASYDIYDLNKR_3	1/P27487	1	y	5	light
1/P27487	615.964	1036.54	33.3	97954_y8_1_HSYTASYDIYDLNKR_3	-1	2429.2	10170_HSYTASYDIYDLNKR_3	0	HSYTASYDIYDLNKR	y8/0.012	HSYTASYDIYDLNKR	3	10170_HSYTASYDIYDLNKR_3	1/P27487	1	y	8	light
1/P27487	462.225	647.278	33.7	97963_b6_1_HSYTASYDIYDLNKR_4	-1	3188.4	10171_HSYTASYDIYDLNKR_4	0	HSYTASYDIYDLNKR	b6/-0.004	HSYTASYDIYDLNKR	4	10171_HSYTASYDIYDLNKR_4	1/P27487	1	b	6	light
1/P27487	462.225	645.368	33.7	97962_y5_1_HSYTASYDIYDLNKR_4	-1	4782.6	10171_HSYTASYDIYDLNKR_4	0	HSYTASYDIYDLNKR	y5/0.002	HSYTASYDIYDLNKR	4	10171_HSYTASYDIYDLNKR_4	1/P27487	1	y	5	light
1/P27487	462.225	489.209	33.7	97959_b4_1_HSYTASYDIYDLNKR_4	-1	3043.5	10171_HSYTASYDIYDLNKR_4	0	HSYTASYDIYDLNKR	b4/-0.007	HSYTASYDIYDLNKR	4	10171_HSYTASYDIYDLNKR_4	1/P27487	1	b	4	light
1/P27487	462.225	530.341	33.7	97960_y4_1_HSYTASYDIYDLNKR_4	-1	3478.3	10171_HSYTASYDIYDLNKR_4	0	HSYTASYDIYDLNKR	y4/-0.001	HSYTASYDIYDLNKR	4	10171_HSYTASYDIYDLNKR_4	1/P27487	1	y	4	light
1/P27487	462.225	808.431	33.7	97964_y6_1_HSYTASYDIYDLNKR_4	-1	6666.7	10171_HSYTASYDIYDLNKR_4	0	HSYTASYDIYDLNKR	y6/-0.000	HSYTASYDIYDLNKR	4	10171_HSYTASYDIYDLNKR_4	1/P27487	1	y	6	light
1/P27487	462.225	560.246	33.7	97961_b5_1_HSYTASYDIYDLNKR_4	-1	4782.6	10171_HSYTASYDIYDLNKR_4	0	HSYTASYDIYDLNKR	b5/-0.006	HSYTASYDIYDLNKR	4	10171_HSYTASYDIYDLNKR_4	1/P27487	1	b	5	light
1/P00734	982.458	1322.65	82.7	98577_y11_1_HQDFNSAVQLVENFC(UniMod:4)R_2	-1	1578.9	10175_HQDFNSAVQLVENFC(UniMod:4)R_2	0	HQDFNSAVQLVENFCR	y11/0.020	HQDFNSAVQLVENFC(UniMod:4)R	2	10175_HQDFNSAVQLVENFC(UniMod:4)R_2	1/P00734	1	y	11	light
1/P00734	982.458	937.456	82.7	98576_y7_1_HQDFNSAVQLVENFC(UniMod:4)R_2	-1	2105.3	10175_HQDFNSAVQLVENFC(UniMod:4)R_2	0	HQDFNSAVQLVENFCR	y7/-0.010	HQDFNSAVQLVENFC(UniMod:4)R	2	10175_HQDFNSAVQLVENFC(UniMod:4)R_2	1/P00734	1	y	7	light
1/P00734	982.458	1826.85	82.7	98578_y15_1_HQDFNSAVQLVENFC(UniMod:4)R_2	-1	1578.9	10175_HQDFNSAVQLVENFC(UniMod:4)R_2	0	HQDFNSAVQLVENFCR	y15/-0.017	HQDFNSAVQLVENFC(UniMod:4)R	2	10175_HQDFNSAVQLVENFC(UniMod:4)R_2	1/P00734	1	y	15	light
1/P00734	982.458	381.152	82.7	98573_b3_1_HQDFNSAVQLVENFC(UniMod:4)R_2	-1	2105.3	10175_HQDFNSAVQLVENFC(UniMod:4)R_2	0	HQDFNSAVQLVENFCR	b3/0.016	HQDFNSAVQLVENFC(UniMod:4)R	2	10175_HQDFNSAVQLVENFC(UniMod:4)R_2	1/P00734	1	b	3	light
1/P00734	982.458	824.372	82.7	98575_y6_1_HQDFNSAVQLVENFC(UniMod:4)R_2	-1	1578.9	10175_HQDFNSAVQLVENFC(UniMod:4)R_2	0	HQDFNSAVQLVENFCR	y6/-0.012	HQDFNSAVQLVENFC(UniMod:4)R	2	10175_HQDFNSAVQLVENFC(UniMod:4)R_2	1/P00734	1	y	6	light
1/P00734	982.458	596.261	82.7	98574_y4_1_HQDFNSAVQLVENFC(UniMod:4)R_2	-1	2631.6	10175_HQDFNSAVQLVENFC(UniMod:4)R_2	0	HQDFNSAVQLVENFCR	y4/0.006,b5-46/0.009	HQDFNSAVQLVENFC(UniMod:4)R	2	10175_HQDFNSAVQLVENFC(UniMod:4)R_2	1/P00734	1	y	4	light
1/P00734	655.307	937.456	82.6	98590_y7_1_HQDFNSAVQLVENFC(UniMod:4)R_3	-1	5587.3	10176_HQDFNSAVQLVENFC(UniMod:4)R_3	0	HQDFNSAVQLVENFCR	y7/0.000	HQDFNSAVQLVENFC(UniMod:4)R	3	10176_HQDFNSAVQLVENFC(UniMod:4)R_3	1/P00734	1	y	7	light
1/P00734	655.307	800.332	82.6	98587_b7_1_HQDFNSAVQLVENFC(UniMod:4)R_3	-1	8613.3	10176_HQDFNSAVQLVENFC(UniMod:4)R_3	0	HQDFNSAVQLVENFCR	b7/0.000	HQDFNSAVQLVENFC(UniMod:4)R	3	10176_HQDFNSAVQLVENFC(UniMod:4)R_3	1/P00734	1	b	7	light
1/P00734	655.307	824.372	82.6	98588_y6_1_HQDFNSAVQLVENFC(UniMod:4)R_3	-1	10000	10176_HQDFNSAVQLVENFC(UniMod:4)R_3	0	HQDFNSAVQLVENFCR	y6/-0.000	HQDFNSAVQLVENFC(UniMod:4)R	3	10176_HQDFNSAVQLVENFC(UniMod:4)R_3	1/P00734	1	y	6	light
1/P00734	655.307	725.304	82.6	98585_y5_1_HQDFNSAVQLVENFC(UniMod:4)R_3	-1	9880.4	10176_HQDFNSAVQLVENFC(UniMod:4)R_3	0	HQDFNSAVQLVENFCR	y5/0.003	HQDFNSAVQLVENFC(UniMod:4)R	3	10176_HQDFNSAVQLVENFC(UniMod:4)R_3	1/P00734	1	y	5	light
1/P00734	655.307	899.401	82.6	98589_b8_1_HQDFNSAVQLVENFC(UniMod:4)R_3	-1	4162.2	10176_HQDFNSAVQLVENFC(UniMod:4)R_3	0	HQDFNSAVQLVENFCR	b8/0.001	HQDFNSAVQLVENFC(UniMod:4)R	3	10176_HQDFNSAVQLVENFC(UniMod:4)R_3	1/P00734	1	b	8	light
1/P00734	655.307	596.261	82.6	98583_y4_1_HQDFNSAVQLVENFC(UniMod:4)R_3	-1	5134.8	10176_HQDFNSAVQLVENFC(UniMod:4)R_3	0	HQDFNSAVQLVENFCR	y4/0.002,b5-46/0.005	HQDFNSAVQLVENFC(UniMod:4)R	3	10176_HQDFNSAVQLVENFC(UniMod:4)R_3	1/P00734	1	y	4	light
1/Q6P988	653.968	514.171	31.1	98018_b4_1_HTDC(UniMod:4)VDTITC(UniMod:4)APTEAIR_3	-1	1030	10176_HTDC(UniMod:4)VDTITC(UniMod:4)APTEAIR_3	0	HTDCVDTITCAPTEAIR	b4/0.008	HTDC(UniMod:4)VDTITC(UniMod:4)APTEAIR	3	10176_HTDC(UniMod:4)VDTITC(UniMod:4)APTEAIR_3	1/Q6P988	1	b	4	10176_HTDC(UniMod:4)VDTITC(UniMod:4)APTEAIR_3
1/Q6P988	653.968	359.24	31.1	98015_y3_1_HTDC(UniMod:4)VDTITC(UniMod:4)APTEAIR_3	-1	944.2	10176_HTDC(UniMod:4)VDTITC(UniMod:4)APTEAIR_3	0	HTDCVDTITCAPTEAIR	y3/-0.005	HTDC(UniMod:4)VDTITC(UniMod:4)APTEAIR	3	10176_HTDC(UniMod:4)VDTITC(UniMod:4)APTEAIR_3	1/Q6P988	1	y	3	10176_HTDC(UniMod:4)VDTITC(UniMod:4)APTEAIR_3
1/Q6P988	653.968	488.283	31.1	98017_y4_1_HTDC(UniMod:4)VDTITC(UniMod:4)APTEAIR_3	-1	652.4	10176_HTDC(UniMod:4)VDTITC(UniMod:4)APTEAIR_3	0	HTDCVDTITCAPTEAIR	y4/0.006	HTDC(UniMod:4)VDTITC(UniMod:4)APTEAIR	3	10176_HTDC(UniMod:4)VDTITC(UniMod:4)APTEAIR_3	1/Q6P988	1	y	4	10176_HTDC(UniMod:4)VDTITC(UniMod:4)APTEAIR_3
1/Q6P988	653.968	354.141	31.1	98014_b3_1_HTDC(UniMod:4)VDTITC(UniMod:4)APTEAIR_3	-1	472.1	10176_HTDC(UniMod:4)VDTITC(UniMod:4)APTEAIR_3	0	HTDCVDTITCAPTEAIR	b3/0.007	HTDC(UniMod:4)VDTITC(UniMod:4)APTEAIR	3	10176_HTDC(UniMod:4)VDTITC(UniMod:4)APTEAIR_3	1/Q6P988	1	b	3	10176_HTDC(UniMod:4)VDTITC(UniMod:4)APTEAIR_3
1/Q6P988	653.968	589.33	31.1	98020_y5_1_HTDC(UniMod:4)VDTITC(UniMod:4)APTEAIR_3	-1	1240.3	10176_HTDC(UniMod:4)VDTITC(UniMod:4)APTEAIR_3	0	HTDCVDTITCAPTEAIR	y5/0.013	HTDC(UniMod:4)VDTITC(UniMod:4)APTEAIR	3	10176_HTDC(UniMod:4)VDTITC(UniMod:4)APTEAIR_3	1/Q6P988	1	y	5	10176_HTDC(UniMod:4)VDTITC(UniMod:4)APTEAIR_3
1/Q6P988	653.968	686.383	31.1	98021_y6_1_HTDC(UniMod:4)VDTITC(UniMod:4)APTEAIR_3	-1	10000	10176_HTDC(UniMod:4)VDTITC(UniMod:4)APTEAIR_3	0	HTDCVDTITCAPTEAIR	y6/0.016	HTDC(UniMod:4)VDTITC(UniMod:4)APTEAIR	3	10176_HTDC(UniMod:4)VDTITC(UniMod:4)APTEAIR_3	1/Q6P988	1	y	6	10176_HTDC(UniMod:4)VDTITC(UniMod:4)APTEAIR_3
1/Q6P988	653.968	686.383	31.1	98021_y6_1_HTDC(UniMod:4)VDTITC(UniMod:4)APTEAIR_3	-1	10000	10176_HTDC(UniMod:4)VDTITC(UniMod:4)APTEAIR_3	0	HTDCVDTITCAPTEAIR	y6/0.016	HTDC(UniMod:4)VDTITC(UniMod:4)APTEAIR	3	10176_HTDC(UniMod:4)VDTITC(UniMod:4)APTEAIR_3	1/Q6P988	1	y	6	light
1/Q6P988	653.968	359.24	31.1	98015_y3_1_HTDC(UniMod:4)VDTITC(UniMod:4)APTEAIR_3	-1	944.2	10176_HTDC(UniMod:4)VDTITC(UniMod:4)APTEAIR_3	0	HTDCVDTITCAPTEAIR	y3/-0.005	HTDC(UniMod:4)VDTITC(UniMod:4)APTEAIR	3	10176_HTDC(UniMod:4)VDTITC(UniMod:4)APTEAIR_3	1/Q6P988	1	y	3	light
1/Q6P988	653.968	354.141	31.1	98014_b3_1_HTDC(UniMod:4)VDTITC(UniMod:4)APTEAIR_3	-1	472.1	10176_HTDC(UniMod:4)VDTITC(UniMod:4)APTEAIR_3	0	HTDCVDTITCAPTEAIR	b3/0.007	HTDC(UniMod:4)VDTITC(UniMod:4)APTEAIR	3	10176_HTDC(UniMod:4)VDTITC(UniMod:4)APTEAIR_3	1/Q6P988	1	b	3	light
1/Q6P988	653.968	488.283	31.1	98017_y4_1_HTDC(UniMod:4)VDTITC(UniMod:4)APTEAIR_3	-1	652.4	10176_HTDC(UniMod:4)VDTITC(UniMod:4)APTEAIR_3	0	HTDCVDTITCAPTEAIR	y4/0.006	HTDC(UniMod:4)VDTITC(UniMod:4)APTEAIR	3	10176_HTDC(UniMod:4)VDTITC(UniMod:4)APTEAIR_3	1/Q6P988	1	y	4	light
1/Q6P988	653.968	589.33	31.1	98020_y5_1_HTDC(UniMod:4)VDTITC(UniMod:4)APTEAIR_3	-1	1240.3	10176_HTDC(UniMod:4)VDTITC(UniMod:4)APTEAIR_3	0	HTDCVDTITCAPTEAIR	y5/0.013	HTDC(UniMod:4)VDTITC(UniMod:4)APTEAIR	3	10176_HTDC(UniMod:4)VDTITC(UniMod:4)APTEAIR_3	1/Q6P988	1	y	5	light
1/Q6P988	653.968	514.171	31.1	98018_b4_1_HTDC(UniMod:4)VDTITC(UniMod:4)APTEAIR_3	-1	1030	10176_HTDC(UniMod:4)VDTITC(UniMod:4)APTEAIR_3	0	HTDCVDTITCAPTEAIR	b4/0.008	HTDC(UniMod:4)VDTITC(UniMod:4)APTEAIR	3	10176_HTDC(UniMod:4)VDTITC(UniMod:4)APTEAIR_3	1/Q6P988	1	b	4	light
1/Q13085	673.372	906.457	52	1419576_y7_1_ILNVPQELYEK_2	-1	10000	101766_ILNVPQELYEK_2	0	ILNVPQELYEK	y7/-0.001	ILNVPQELYEK	2	101766_ILNVPQELYEK_2	1/Q13085	1	y	7	light
1/Q13085	673.372	681.345	52	1419574_y5_1_ILNVPQELYEK_2	-1	1087	101766_ILNVPQELYEK_2	0	ILNVPQELYEK	y5/0.003,m3:8/-0.008	ILNVPQELYEK	2	101766_ILNVPQELYEK_2	1/Q13085	1	y	5	light
1/Q13085	673.372	1119.57	52	1419580_y9_1_ILNVPQELYEK_2	-1	3153.2	101766_ILNVPQELYEK_2	0	ILNVPQELYEK	y9/0.002	ILNVPQELYEK	2	101766_ILNVPQELYEK_2	1/Q13085	1	y	9	light
1/Q13085	673.372	440.287	52	1419571_b4_1_ILNVPQELYEK_2	-1	1936.5	101766_ILNVPQELYEK_2	0	ILNVPQELYEK	b4/0.001	ILNVPQELYEK	2	101766_ILNVPQELYEK_2	1/Q13085	1	b	4	light
1/Q13085	673.372	439.219	52	1419570_y3_1_ILNVPQELYEK_2	-1	1220	101766_ILNVPQELYEK_2	0	ILNVPQELYEK	y3/-0.001,m3:6/-0.012	ILNVPQELYEK	2	101766_ILNVPQELYEK_2	1/Q13085	1	y	3	light
1/Q13085	673.372	1005.53	52	1419578_y8_1_ILNVPQELYEK_2	-1	1467.7	101766_ILNVPQELYEK_2	0	ILNVPQELYEK	y8/0.000	ILNVPQELYEK	2	101766_ILNVPQELYEK_2	1/Q13085	1	y	8	light
1/Q6P988	706.002	881.932	25.7	98033_y15_2_HTDC(UniMod:4)VDTITC(UniMod:4)APTEAIRR_3	-1	5192.3	10177_HTDC(UniMod:4)VDTITC(UniMod:4)APTEAIRR_3	0	HTDCVDTITCAPTEAIRR	y15^2/0.014	HTDC(UniMod:4)VDTITC(UniMod:4)APTEAIRR	3	10177_HTDC(UniMod:4)VDTITC(UniMod:4)APTEAIRR_3	1/Q6P988	2	y	15	10177_HTDC(UniMod:4)VDTITC(UniMod:4)APTEAIRR_3
1/Q6P988	706.002	694.869	25.7	98029_y12_2_HTDC(UniMod:4)VDTITC(UniMod:4)APTEAIRR_3	-1	5384.6	10177_HTDC(UniMod:4)VDTITC(UniMod:4)APTEAIRR_3	0	HTDCVDTITCAPTEAIRR	y12^2/0.018	HTDC(UniMod:4)VDTITC(UniMod:4)APTEAIRR	3	10177_HTDC(UniMod:4)VDTITC(UniMod:4)APTEAIRR_3	1/Q6P988	2	y	12	10177_HTDC(UniMod:4)VDTITC(UniMod:4)APTEAIRR_3
1/Q6P988	706.002	829.314	25.7	98032_b7_1_HTDC(UniMod:4)VDTITC(UniMod:4)APTEAIRR_3	-1	2884.6	10177_HTDC(UniMod:4)VDTITC(UniMod:4)APTEAIRR_3	0	HTDCVDTITCAPTEAIRR	b7/-0.001	HTDC(UniMod:4)VDTITC(UniMod:4)APTEAIRR	3	10177_HTDC(UniMod:4)VDTITC(UniMod:4)APTEAIRR_3	1/Q6P988	1	b	7	10177_HTDC(UniMod:4)VDTITC(UniMod:4)APTEAIRR_3
1/Q6P988	706.002	752.383	25.7	98031_y13_2_HTDC(UniMod:4)VDTITC(UniMod:4)APTEAIRR_3	-1	2307.7	10177_HTDC(UniMod:4)VDTITC(UniMod:4)APTEAIRR_3	0	HTDCVDTITCAPTEAIRR	y13^2/0.016	HTDC(UniMod:4)VDTITC(UniMod:4)APTEAIRR	3	10177_HTDC(UniMod:4)VDTITC(UniMod:4)APTEAIRR_3	1/Q6P988	2	y	13	10177_HTDC(UniMod:4)VDTITC(UniMod:4)APTEAIRR_3
1/Q6P988	706.002	644.384	25.7	98027_y5_1_HTDC(UniMod:4)VDTITC(UniMod:4)APTEAIRR_3	-1	1028.4	10177_HTDC(UniMod:4)VDTITC(UniMod:4)APTEAIRR_3	0	HTDCVDTITCAPTEAIRR	y5/0.006	HTDC(UniMod:4)VDTITC(UniMod:4)APTEAIRR	3	10177_HTDC(UniMod:4)VDTITC(UniMod:4)APTEAIRR_3	1/Q6P988	1	y	5	10177_HTDC(UniMod:4)VDTITC(UniMod:4)APTEAIRR_3
1/Q6P988	706.002	728.267	25.7	98030_b6_1_HTDC(UniMod:4)VDTITC(UniMod:4)APTEAIRR_3	-1	2211.5	10177_HTDC(UniMod:4)VDTITC(UniMod:4)APTEAIRR_3	0	HTDCVDTITCAPTEAIRR	b6/0.014,b13-17^2/-0.017	HTDC(UniMod:4)VDTITC(UniMod:4)APTEAIRR	3	10177_HTDC(UniMod:4)VDTITC(UniMod:4)APTEAIRR_3	1/Q6P988	1	b	6	10177_HTDC(UniMod:4)VDTITC(UniMod:4)APTEAIRR_3
1/Q6P988	706.002	728.267	25.7	98030_b6_1_HTDC(UniMod:4)VDTITC(UniMod:4)APTEAIRR_3	-1	2211.5	10177_HTDC(UniMod:4)VDTITC(UniMod:4)APTEAIRR_3	0	HTDCVDTITCAPTEAIRR	b6/0.014,b13-17^2/-0.017	HTDC(UniMod:4)VDTITC(UniMod:4)APTEAIRR	3	10177_HTDC(UniMod:4)VDTITC(UniMod:4)APTEAIRR_3	1/Q6P988	1	b	6	light
1/Q6P988	706.002	829.314	25.7	98032_b7_1_HTDC(UniMod:4)VDTITC(UniMod:4)APTEAIRR_3	-1	2884.6	10177_HTDC(UniMod:4)VDTITC(UniMod:4)APTEAIRR_3	0	HTDCVDTITCAPTEAIRR	b7/-0.001	HTDC(UniMod:4)VDTITC(UniMod:4)APTEAIRR	3	10177_HTDC(UniMod:4)VDTITC(UniMod:4)APTEAIRR_3	1/Q6P988	1	b	7	light
1/Q6P988	706.002	694.869	25.7	98029_y12_2_HTDC(UniMod:4)VDTITC(UniMod:4)APTEAIRR_3	-1	5384.6	10177_HTDC(UniMod:4)VDTITC(UniMod:4)APTEAIRR_3	0	HTDCVDTITCAPTEAIRR	y12^2/0.018	HTDC(UniMod:4)VDTITC(UniMod:4)APTEAIRR	3	10177_HTDC(UniMod:4)VDTITC(UniMod:4)APTEAIRR_3	1/Q6P988	2	y	12	light
1/Q6P988	706.002	644.384	25.7	98027_y5_1_HTDC(UniMod:4)VDTITC(UniMod:4)APTEAIRR_3	-1	1028.4	10177_HTDC(UniMod:4)VDTITC(UniMod:4)APTEAIRR_3	0	HTDCVDTITCAPTEAIRR	y5/0.006	HTDC(UniMod:4)VDTITC(UniMod:4)APTEAIRR	3	10177_HTDC(UniMod:4)VDTITC(UniMod:4)APTEAIRR_3	1/Q6P988	1	y	5	light
1/Q6P988	706.002	752.383	25.7	98031_y13_2_HTDC(UniMod:4)VDTITC(UniMod:4)APTEAIRR_3	-1	2307.7	10177_HTDC(UniMod:4)VDTITC(UniMod:4)APTEAIRR_3	0	HTDCVDTITCAPTEAIRR	y13^2/0.016	HTDC(UniMod:4)VDTITC(UniMod:4)APTEAIRR	3	10177_HTDC(UniMod:4)VDTITC(UniMod:4)APTEAIRR_3	1/Q6P988	2	y	13	light
1/Q6P988	706.002	881.932	25.7	98033_y15_2_HTDC(UniMod:4)VDTITC(UniMod:4)APTEAIRR_3	-1	5192.3	10177_HTDC(UniMod:4)VDTITC(UniMod:4)APTEAIRR_3	0	HTDCVDTITCAPTEAIRR	y15^2/0.014	HTDC(UniMod:4)VDTITC(UniMod:4)APTEAIRR	3	10177_HTDC(UniMod:4)VDTITC(UniMod:4)APTEAIRR_3	1/Q6P988	2	y	15	light
1/P00747	513.768	436.186	-21.3	1558899_KVYLSEC(UniMod:4)K_2	-1	262.2	101790_KVYLSEC(UniMod:4)K_2	0	KVYLSECK	y3/0.002	KVYLSEC(UniMod:4)K	2	101790_KVYLSEC(UniMod:4)K_2	1/P00747	1	y	-1	light
1/P00747	513.768	523.218	-21.3	1558901_KVYLSEC(UniMod:4)K_2	-1	1261.7	101790_KVYLSEC(UniMod:4)K_2	0	KVYLSECK	y4/0.001	KVYLSEC(UniMod:4)K	2	101790_KVYLSEC(UniMod:4)K_2	1/P00747	1	y	-1	light
1/P00747	513.768	720.393	-21.3	1558903_KVYLSEC(UniMod:4)K_2	-1	282.4	101790_KVYLSEC(UniMod:4)K_2	0	KVYLSECK	b6/-0.004	KVYLSEC(UniMod:4)K	2	101790_KVYLSEC(UniMod:4)K_2	1/P00747	1	b	-1	light
1/P00747	513.768	898.434	-21.3	1558906_KVYLSEC(UniMod:4)K_2	-1	1558.7	101790_KVYLSEC(UniMod:4)K_2	0	KVYLSECK	y7/-0.002,b7+18/-0.002	KVYLSEC(UniMod:4)K	2	101790_KVYLSEC(UniMod:4)K_2	1/P00747	1	y	-1	light
1/P00747	513.768	636.302	-21.3	1558902_KVYLSEC(UniMod:4)K_2	-1	791.4	101790_KVYLSEC(UniMod:4)K_2	0	KVYLSECK	y5/0.001	KVYLSEC(UniMod:4)K	2	101790_KVYLSEC(UniMod:4)K_2	1/P00747	1	y	-1	light
1/P00747	513.768	799.365	-21.3	1558904_KVYLSEC(UniMod:4)K_2	-1	3137.6	101790_KVYLSEC(UniMod:4)K_2	0	KVYLSECK	y6/-0.004	KVYLSEC(UniMod:4)K	2	101790_KVYLSEC(UniMod:4)K_2	1/P00747	1	y	-1	light
1/Q8IY17	621.856	399.224	110	6601_b4_1_GDLIGVVEALTR_2	-1	1349.9	1018_GDLIGVVEALTR_2	0	GDLIGVVEALTR	b4/-0.000,m6:9/-0.000	GDLIGVVEALTR	2	1018_GDLIGVVEALTR_2	1/Q8IY17	1	b	4	light
1/Q8IY17	621.856	589.33	110	6607_y5_1_GDLIGVVEALTR_2	-1	1305.6	1018_GDLIGVVEALTR_2	0	GDLIGVVEALTR	y5/0.007	GDLIGVVEALTR	2	1018_GDLIGVVEALTR_2	1/Q8IY17	1	y	5	light
1/Q8IY17	621.856	844.489	110	6612_y8_1_GDLIGVVEALTR_2	-1	10000	1018_GDLIGVVEALTR_2	0	GDLIGVVEALTR	y8/0.004	GDLIGVVEALTR	2	1018_GDLIGVVEALTR_2	1/Q8IY17	1	y	8	light
1/Q8IY17	621.856	688.399	110	6609_y6_1_GDLIGVVEALTR_2	-1	3542.7	1018_GDLIGVVEALTR_2	0	GDLIGVVEALTR	y6/0.003	GDLIGVVEALTR	2	1018_GDLIGVVEALTR_2	1/Q8IY17	1	y	6	light
1/Q8IY17	621.856	787.467	110	6611_y7_1_GDLIGVVEALTR_2	-1	1485.8	1018_GDLIGVVEALTR_2	0	GDLIGVVEALTR	y7/0.001	GDLIGVVEALTR	2	1018_GDLIGVVEALTR_2	1/Q8IY17	1	y	7	light
1/Q8IY17	621.856	460.288	110	6603_y4_1_GDLIGVVEALTR_2	-1	1503.7	1018_GDLIGVVEALTR_2	0	GDLIGVVEALTR	y4/0.002	GDLIGVVEALTR	2	1018_GDLIGVVEALTR_2	1/Q8IY17	1	y	4	light
1/Q75T13	1035.6	1362.74	134.8	1420244_y13_1_ILPLTGIPVLFLPGNAGSYK_2	-1	10000	101820_ILPLTGIPVLFLPGNAGSYK_2	0	ILPLTGIPVLFLPGNAGSYK	y13/0.008	ILPLTGIPVLFLPGNAGSYK	2	101820_ILPLTGIPVLFLPGNAGSYK_2	1/Q75T13	1	y	13	light
1/Q75T13	1035.6	793.384	134.8	1420241_y8_1_ILPLTGIPVLFLPGNAGSYK_2	-1	8539.3	101820_ILPLTGIPVLFLPGNAGSYK_2	0	ILPLTGIPVLFLPGNAGSYK	y8/0.012	ILPLTGIPVLFLPGNAGSYK	2	101820_ILPLTGIPVLFLPGNAGSYK_2	1/Q75T13	1	y	8	light
1/Q75T13	1035.6	708.465	134.8	1420240_b7_1_ILPLTGIPVLFLPGNAGSYK_2	-1	1587.2	101820_ILPLTGIPVLFLPGNAGSYK_2	0	ILPLTGIPVLFLPGNAGSYK	b7/-0.003	ILPLTGIPVLFLPGNAGSYK	2	101820_ILPLTGIPVLFLPGNAGSYK_2	1/Q75T13	1	b	7	light
1/Q75T13	1035.6	1053.54	134.8	1420242_y10_1_ILPLTGIPVLFLPGNAGSYK_2	-1	5519.9	101820_ILPLTGIPVLFLPGNAGSYK_2	0	ILPLTGIPVLFLPGNAGSYK	y10/-0.001	ILPLTGIPVLFLPGNAGSYK	2	101820_ILPLTGIPVLFLPGNAGSYK_2	1/Q75T13	1	y	10	light
1/Q75T13	1035.6	595.381	134.8	1420238_b6_1_ILPLTGIPVLFLPGNAGSYK_2	-1	4144.1	101820_ILPLTGIPVLFLPGNAGSYK_2	0	ILPLTGIPVLFLPGNAGSYK	b6/-0.005,m2:7/-0.005	ILPLTGIPVLFLPGNAGSYK	2	101820_ILPLTGIPVLFLPGNAGSYK_2	1/Q75T13	1	b	6	light
1/Q75T13	1035.6	1277.82	134.8	1420243_b12_1_ILPLTGIPVLFLPGNAGSYK_2	-1	1587.2	101820_ILPLTGIPVLFLPGNAGSYK_2	0	ILPLTGIPVLFLPGNAGSYK	b12/-0.010	ILPLTGIPVLFLPGNAGSYK	2	101820_ILPLTGIPVLFLPGNAGSYK_2	1/Q75T13	1	b	12	light
1/P10643	472.286	717.396	31.6	1420250_y6_1_ILPLTVC(UniMod:4)K_2	-1	9666.7	101821_ILPLTVC(UniMod:4)K_2	0	ILPLTVCK	y6/0.015	ILPLTVC(UniMod:4)K	2	101821_ILPLTVC(UniMod:4)K_2	1/P10643	1	y	6	light
1/P10643	472.286	507.26	31.6	1420248_y4_1_ILPLTVC(UniMod:4)K_2	-1	1642.9	101821_ILPLTVC(UniMod:4)K_2	0	ILPLTVCK	y4/-0.010	ILPLTVC(UniMod:4)K	2	101821_ILPLTVC(UniMod:4)K_2	1/P10643	1	y	4	light
1/P10643	472.286	830.48	31.6	1420251_y7_1_ILPLTVC(UniMod:4)K_2	-1	503	101821_ILPLTVC(UniMod:4)K_2	0	ILPLTVCK	y7/0.006	ILPLTVC(UniMod:4)K	2	101821_ILPLTVC(UniMod:4)K_2	1/P10643	1	y	7	light
1/P10643	472.286	406.212	31.6	1420247_y3_1_ILPLTVC(UniMod:4)K_2	-1	1476.2	101821_ILPLTVC(UniMod:4)K_2	0	ILPLTVCK	y3/-0.005	ILPLTVC(UniMod:4)K	2	101821_ILPLTVC(UniMod:4)K_2	1/P10643	1	y	3	light
1/P10643	472.286	359.202	31.6	1420246_y6_2_ILPLTVC(UniMod:4)K_2	-1	7738.1	101821_ILPLTVC(UniMod:4)K_2	0	ILPLTVCK	y6^2/0.006	ILPLTVC(UniMod:4)K	2	101821_ILPLTVC(UniMod:4)K_2	1/P10643	2	y	6	light
1/P10643	472.286	620.344	31.6	1420249_y5_1_ILPLTVC(UniMod:4)K_2	-1	1166.7	101821_ILPLTVC(UniMod:4)K_2	0	ILPLTVCK	y5/-0.017	ILPLTVC(UniMod:4)K	2	101821_ILPLTVC(UniMod:4)K_2	1/P10643	1	y	5	light
1/P49327	929.2	1216.18	159.4	155745_ALGLGVEQLPVVFEDVVLHQATILPK_3	-1	2758.3	10187_ALGLGVEQLPVVFEDVVLHQATILPK_3	0	ALGLGVEQLPVVFEDVVLHQATILPK	y22^2/-0.004	ALGLGVEQLPVVFEDVVLHQATILPK	3	10187_ALGLGVEQLPVVFEDVVLHQATILPK_3	1/P49327	2	y	-1	light
1/P49327	929.2	907.536	159.4	155734_ALGLGVEQLPVVFEDVVLHQATILPK_3	-1	2138.1	10187_ALGLGVEQLPVVFEDVVLHQATILPK_3	0	ALGLGVEQLPVVFEDVVLHQATILPK	y8/-0.004	ALGLGVEQLPVVFEDVVLHQATILPK	3	10187_ALGLGVEQLPVVFEDVVLHQATILPK_3	1/P49327	1	y	-1	light
1/P49327	929.2	357.25	159.4	155722_ALGLGVEQLPVVFEDVVLHQATILPK_3	-1	2905.9	10187_ALGLGVEQLPVVFEDVVLHQATILPK_3	0	ALGLGVEQLPVVFEDVVLHQATILPK	y3/-0.001	ALGLGVEQLPVVFEDVVLHQATILPK	3	10187_ALGLGVEQLPVVFEDVVLHQATILPK_3	1/P49327	1	y	-1	light
1/P49327	929.2	1138.14	159.4	155742_ALGLGVEQLPVVFEDVVLHQATILPK_3	-1	3383.5	10187_ALGLGVEQLPVVFEDVVLHQATILPK_3	0	ALGLGVEQLPVVFEDVVLHQATILPK	y20^2/-0.002	ALGLGVEQLPVVFEDVVLHQATILPK	3	10187_ALGLGVEQLPVVFEDVVLHQATILPK_3	1/P49327	2	y	-1	light
1/P49327	929.2	953.046	159.4	155736_ALGLGVEQLPVVFEDVVLHQATILPK_3	-1	6843.2	10187_ALGLGVEQLPVVFEDVVLHQATILPK_3	0	ALGLGVEQLPVVFEDVVLHQATILPK	y17^2/-0.002	ALGLGVEQLPVVFEDVVLHQATILPK	3	10187_ALGLGVEQLPVVFEDVVLHQATILPK_3	1/P49327	2	y	-1	light
1/P49327	929.2	511.324	159.4	155724_ALGLGVEQLPVVFEDVVLHQATILPK_3	-1	1876.2	10187_ALGLGVEQLPVVFEDVVLHQATILPK_3	0	ALGLGVEQLPVVFEDVVLHQATILPK	b6/-0.002	ALGLGVEQLPVVFEDVVLHQATILPK	3	10187_ALGLGVEQLPVVFEDVVLHQATILPK_3	1/P49327	1	b	-1	light
1/P49327	697.152	854.985	158.6	155762_ALGLGVEQLPVVFEDVVLHQATILPK_4	-1	4529.1	10188_ALGLGVEQLPVVFEDVVLHQATILPK_4	0	ALGLGVEQLPVVFEDVVLHQATILPK	y15^2/0.002	ALGLGVEQLPVVFEDVVLHQATILPK	4	10188_ALGLGVEQLPVVFEDVVLHQATILPK_4	1/P49327	2	y	-1	light
1/P49327	697.152	731.917	158.6	155755_ALGLGVEQLPVVFEDVVLHQATILPK_4	-1	2791.9	10188_ALGLGVEQLPVVFEDVVLHQATILPK_4	0	ALGLGVEQLPVVFEDVVLHQATILPK	y13^2/-0.001	ALGLGVEQLPVVFEDVVLHQATILPK	4	10188_ALGLGVEQLPVVFEDVVLHQATILPK_4	1/P49327	2	y	-1	light
1/P49327	697.152	881.509	158.6	155763_ALGLGVEQLPVVFEDVVLHQATILPK_4	-1	5610.9	10188_ALGLGVEQLPVVFEDVVLHQATILPK_4	0	ALGLGVEQLPVVFEDVVLHQATILPK	b9/-0.001,y16-46^2/-0.008	ALGLGVEQLPVVFEDVVLHQATILPK	4	10188_ALGLGVEQLPVVFEDVVLHQATILPK_4	1/P49327	1	b	-1	light
1/P49327	697.152	768.425	158.6	155756_ALGLGVEQLPVVFEDVVLHQATILPK_4	-1	5577.3	10188_ALGLGVEQLPVVFEDVVLHQATILPK_4	0	ALGLGVEQLPVVFEDVVLHQATILPK	b8/0.000	ALGLGVEQLPVVFEDVVLHQATILPK	4	10188_ALGLGVEQLPVVFEDVVLHQATILPK_4	1/P49327	1	b	-1	light
1/P49327	697.152	805.451	158.6	155759_ALGLGVEQLPVVFEDVVLHQATILPK_4	-1	5774.3	10188_ALGLGVEQLPVVFEDVVLHQATILPK_4	0	ALGLGVEQLPVVFEDVVLHQATILPK	y14^2/0.001,y22-17^3/0.003	ALGLGVEQLPVVFEDVVLHQATILPK	4	10188_ALGLGVEQLPVVFEDVVLHQATILPK_4	1/P49327	2	y	-1	light
1/P49327	697.152	953.046	158.6	155767_ALGLGVEQLPVVFEDVVLHQATILPK_4	-1	8185.8	10188_ALGLGVEQLPVVFEDVVLHQATILPK_4	0	ALGLGVEQLPVVFEDVVLHQATILPK	y17^2/0.002	ALGLGVEQLPVVFEDVVLHQATILPK	4	10188_ALGLGVEQLPVVFEDVVLHQATILPK_4	1/P49327	2	y	-1	light
1/P52732	479.769	604.305	1.5	1421336_y6_1_ILQDSLGGR_2	-1	2355.5	101896_ILQDSLGGR_2	0	ILQDSLGGR	y6/-0.003	ILQDSLGGR	2	101896_ILQDSLGGR_2	1/P52732	1	y	6	light
1/P52732	479.769	489.278	1.5	1421335_y5_1_ILQDSLGGR_2	-1	1784	101896_ILQDSLGGR_2	0	ILQDSLGGR	y5/-0.001	ILQDSLGGR	2	101896_ILQDSLGGR_2	1/P52732	1	y	5	light
1/P52732	479.769	366.685	1.5	1421331_y7_2_ILQDSLGGR_2	-1	835.3	101896_ILQDSLGGR_2	0	ILQDSLGGR	y7^2/0.001	ILQDSLGGR	2	101896_ILQDSLGGR_2	1/P52732	2	y	7	light
1/P52732	479.769	402.246	1.5	1421332_y4_1_ILQDSLGGR_2	-1	559.9	101896_ILQDSLGGR_2	0	ILQDSLGGR	y4/0.000	ILQDSLGGR	2	101896_ILQDSLGGR_2	1/P52732	1	y	4	light
1/P52732	479.769	845.448	1.5	1421339_y8_1_ILQDSLGGR_2	-1	979.3	101896_ILQDSLGGR_2	0	ILQDSLGGR	y8/-0.003	ILQDSLGGR	2	101896_ILQDSLGGR_2	1/P52732	1	y	8	light
1/P52732	479.769	732.363	1.5	1421338_y7_1_ILQDSLGGR_2	-1	4816.6	101896_ILQDSLGGR_2	0	ILQDSLGGR	y7/-0.000	ILQDSLGGR	2	101896_ILQDSLGGR_2	1/P52732	1	y	7	light
1/Q99487	891.163	583.345	146.3	1421759_b5_1_ILQEVTAGQTVFNILPGGLDLMTLK_3	-1	2081	101925_ILQEVTAGQTVFNILPGGLDLMTLK_3	0	ILQEVTAGQTVFNILPGGLDLMTLK	b5/-0.004	ILQEVTAGQTVFNILPGGLDLMTLK	3	101925_ILQEVTAGQTVFNILPGGLDLMTLK_3	1/Q99487	1	b	5	light
1/Q99487	891.163	522.792	146.3	1421757_y10_2_ILQEVTAGQTVFNILPGGLDLMTLK_3	-1	2670.2	101925_ILQEVTAGQTVFNILPGGLDLMTLK_3	0	ILQEVTAGQTVFNILPGGLDLMTLK	y10^2/0.004	ILQEVTAGQTVFNILPGGLDLMTLK	3	101925_ILQEVTAGQTVFNILPGGLDLMTLK_3	1/Q99487	2	y	10	light
1/Q99487	891.163	755.43	146.3	1421762_b7_1_ILQEVTAGQTVFNILPGGLDLMTLK_3	-1	1505.2	101925_ILQEVTAGQTVFNILPGGLDLMTLK_3	0	ILQEVTAGQTVFNILPGGLDLMTLK	[b7/0.017]	ILQEVTAGQTVFNILPGGLDLMTLK	3	101925_ILQEVTAGQTVFNILPGGLDLMTLK_3	1/Q99487	1	b	7	light
1/Q99487	891.163	355.234	146.3	1421752_b3_1_ILQEVTAGQTVFNILPGGLDLMTLK_3	-1	1451.1	101925_ILQEVTAGQTVFNILPGGLDLMTLK_3	0	ILQEVTAGQTVFNILPGGLDLMTLK	b3/0.010	ILQEVTAGQTVFNILPGGLDLMTLK	3	101925_ILQEVTAGQTVFNILPGGLDLMTLK_3	1/Q99487	1	b	3	light
1/Q99487	891.163	1044.58	146.3	1421768_y10_1_ILQEVTAGQTVFNILPGGLDLMTLK_3	-1	10000	101925_ILQEVTAGQTVFNILPGGLDLMTLK_3	0	ILQEVTAGQTVFNILPGGLDLMTLK	y10/-0.002	ILQEVTAGQTVFNILPGGLDLMTLK	3	101925_ILQEVTAGQTVFNILPGGLDLMTLK_3	1/Q99487	1	y	10	light
1/Q99487	891.163	484.277	146.3	1421755_b4_1_ILQEVTAGQTVFNILPGGLDLMTLK_3	-1	1473.6	101925_ILQEVTAGQTVFNILPGGLDLMTLK_3	0	ILQEVTAGQTVFNILPGGLDLMTLK	b4/-0.015	ILQEVTAGQTVFNILPGGLDLMTLK	3	101925_ILQEVTAGQTVFNILPGGLDLMTLK_3	1/Q99487	1	b	4	light
1/P13798	1025.95	1357.57	96	6628_y11_1_GDQFVFYEDWGENMVSK_2	-1	5914	1020_GDQFVFYEDWGENMVSK_2	0	GDQFVFYEDWGENMVSK	y11/0.019	GDQFVFYEDWGENMVSK	2	1020_GDQFVFYEDWGENMVSK_2	1/P13798	1	y	11	light
1/P13798	1025.95	448.183	96	6622_b4_1_GDQFVFYEDWGENMVSK_2	-1	2356.4	1020_GDQFVFYEDWGENMVSK_2	0	GDQFVFYEDWGENMVSK	b4/-0.018	GDQFVFYEDWGENMVSK	2	1020_GDQFVFYEDWGENMVSK_2	1/P13798	1	b	4	light
1/P13798	1025.95	764.361	96	6625_y7_1_GDQFVFYEDWGENMVSK_2	-1	1935.5	1020_GDQFVFYEDWGENMVSK_2	0	GDQFVFYEDWGENMVSK	y7/0.017	GDQFVFYEDWGENMVSK	2	1020_GDQFVFYEDWGENMVSK_2	1/P13798	1	y	7	light
1/P13798	1025.95	950.44	96	6626_y8_1_GDQFVFYEDWGENMVSK_2	-1	1828	1020_GDQFVFYEDWGENMVSK_2	0	GDQFVFYEDWGENMVSK	y8/0.005	GDQFVFYEDWGENMVSK	2	1020_GDQFVFYEDWGENMVSK_2	1/P13798	1	y	8	light
1/P13798	1025.95	1194.51	96	6627_y10_1_GDQFVFYEDWGENMVSK_2	-1	3333.3	1020_GDQFVFYEDWGENMVSK_2	0	GDQFVFYEDWGENMVSK	y10/0.000	GDQFVFYEDWGENMVSK	2	1020_GDQFVFYEDWGENMVSK_2	1/P13798	1	y	10	light
1/P13798	1025.95	547.251	96	6623_b5_1_GDQFVFYEDWGENMVSK_2	-1	2258.1	1020_GDQFVFYEDWGENMVSK_2	0	GDQFVFYEDWGENMVSK	b5/0.011	GDQFVFYEDWGENMVSK	2	1020_GDQFVFYEDWGENMVSK_2	1/P13798	1	b	5	light
1/Q9H0R6	576.345	1038.6	88.3	1423869_y9_1_ILSGNFFLLK_2	-1	1698.8	102073_ILSGNFFLLK_2	0	ILSGNFFLLK	y9/0.000	ILSGNFFLLK	2	102073_ILSGNFFLLK_2	1/Q9H0R6	1	y	9	light
1/Q9H0R6	576.345	373.281	88.3	1423860_y3_1_ILSGNFFLLK_2	-1	954.8	102073_ILSGNFFLLK_2	0	ILSGNFFLLK	y3/-0.001	ILSGNFFLLK	2	102073_ILSGNFFLLK_2	1/Q9H0R6	1	y	3	light
1/Q9H0R6	576.345	838.482	88.3	1423865_y7_1_ILSGNFFLLK_2	-1	1355.3	102073_ILSGNFFLLK_2	0	ILSGNFFLLK	y7/0.004	ILSGNFFLLK	2	102073_ILSGNFFLLK_2	1/Q9H0R6	1	y	7	light
1/Q9H0R6	576.345	520.349	88.3	1423861_y4_1_ILSGNFFLLK_2	-1	831.4	102073_ILSGNFFLLK_2	0	ILSGNFFLLK	y4/-0.004	ILSGNFFLLK	2	102073_ILSGNFFLLK_2	1/Q9H0R6	1	y	4	light
1/Q9H0R6	576.345	781.461	88.3	1423864_y6_1_ILSGNFFLLK_2	-1	620.1	102073_ILSGNFFLLK_2	0	ILSGNFFLLK	y6/-0.008	ILSGNFFLLK	2	102073_ILSGNFFLLK_2	1/Q9H0R6	1	y	6	light
1/Q9H0R6	576.345	925.514	88.3	1423867_y8_1_ILSGNFFLLK_2	-1	10000	102073_ILSGNFFLLK_2	0	ILSGNFFLLK	y8/-0.001	ILSGNFFLLK	2	102073_ILSGNFFLLK_2	1/Q9H0R6	1	y	8	light
1/O14773	768.954	527.33	59.1	1423883_b5_1_ILSGRPPLGFLNPR_2	-1	348.3	102075_ILSGRPPLGFLNPR_2	0	ILSGRPPLGFLNPR	b5/0.003	ILSGRPPLGFLNPR	2	102075_ILSGRPPLGFLNPR_2	1/O14773	1	b	5	light
1/O14773	768.954	1265.74	59.1	1423892_b12_1_ILSGRPPLGFLNPR_2	-1	204.4	102075_ILSGRPPLGFLNPR_2	0	ILSGRPPLGFLNPR	b12/0.020	ILSGRPPLGFLNPR	2	102075_ILSGRPPLGFLNPR_2	1/O14773	1	b	12	light
1/O14773	768.954	913.525	59.1	1423888_y8_1_ILSGRPPLGFLNPR_2	-1	221.6	102075_ILSGRPPLGFLNPR_2	0	ILSGRPPLGFLNPR	y8/0.014	ILSGRPPLGFLNPR	2	102075_ILSGRPPLGFLNPR_2	1/O14773	1	y	8	light
1/O14773	768.954	703.389	59.1	1423885_y6_1_ILSGRPPLGFLNPR_2	-1	130.6	102075_ILSGRPPLGFLNPR_2	0	ILSGRPPLGFLNPR	y6/0.003	ILSGRPPLGFLNPR	2	102075_ILSGRPPLGFLNPR_2	1/O14773	1	y	6	light
1/O14773	768.954	1010.58	59.1	1423889_y9_1_ILSGRPPLGFLNPR_2	-1	443.1	102075_ILSGRPPLGFLNPR_2	0	ILSGRPPLGFLNPR	y9/0.010	ILSGRPPLGFLNPR	2	102075_ILSGRPPLGFLNPR_2	1/O14773	1	y	9	light
1/O14773	768.954	505.793	59.1	1423882_y9_2_ILSGRPPLGFLNPR_2	-1	121	102075_ILSGRPPLGFLNPR_2	0	ILSGRPPLGFLNPR	y9^2/-0.009	ILSGRPPLGFLNPR	2	102075_ILSGRPPLGFLNPR_2	1/O14773	2	y	9	light
1/O14773	512.972	505.793	61.4	1423895_y9_2_ILSGRPPLGFLNPR_3	-1	501.5	102076_ILSGRPPLGFLNPR_3	0	ILSGRPPLGFLNPR	y9^2/0.003,a10^2/-0.016	ILSGRPPLGFLNPR	3	102076_ILSGRPPLGFLNPR_3	1/O14773	2	y	9	light
1/O14773	512.972	712.412	61.4	1423900_y13_2_ILSGRPPLGFLNPR_3	-1	2633.8	102076_ILSGRPPLGFLNPR_3	0	ILSGRPPLGFLNPR	y13^2/0.002	ILSGRPPLGFLNPR	3	102076_ILSGRPPLGFLNPR_3	1/O14773	2	y	13	light
1/O14773	512.972	913.525	61.4	1423902_y8_1_ILSGRPPLGFLNPR_3	-1	792.7	102076_ILSGRPPLGFLNPR_3	0	ILSGRPPLGFLNPR	y8/0.002	ILSGRPPLGFLNPR	3	102076_ILSGRPPLGFLNPR_3	1/O14773	1	y	8	light
1/O14773	512.972	703.389	61.4	1423899_y6_1_ILSGRPPLGFLNPR_3	-1	1439.4	102076_ILSGRPPLGFLNPR_3	0	ILSGRPPLGFLNPR	y6/0.009,y13-18^2/-0.009	ILSGRPPLGFLNPR	3	102076_ILSGRPPLGFLNPR_3	1/O14773	1	y	6	light
1/O14773	512.972	1010.58	61.4	1423903_y9_1_ILSGRPPLGFLNPR_3	-1	3285.7	102076_ILSGRPPLGFLNPR_3	0	ILSGRPPLGFLNPR	y9/-0.001	ILSGRPPLGFLNPR	3	102076_ILSGRPPLGFLNPR_3	1/O14773	1	y	9	light
1/O14773	512.972	655.87	61.4	1423898_y12_2_ILSGRPPLGFLNPR_3	-1	10000	102076_ILSGRPPLGFLNPR_3	0	ILSGRPPLGFLNPR	y12^2/0.003	ILSGRPPLGFLNPR	3	102076_ILSGRPPLGFLNPR_3	1/O14773	2	y	12	light
1/P36776	581.845	405.25	15.7	1563510_KYLLQEQLK_2	-1	222.5	102079_KYLLQEQLK_2	0	KYLLQEQLK	b3/0.005	KYLLQEQLK	2	102079_KYLLQEQLK_2	1/P36776	1	b	-1	light
1/P36776	581.845	646.392	15.7	1563515_KYLLQEQLK_2	-1	206.3	102079_KYLLQEQLK_2	0	KYLLQEQLK	b5/0.004	KYLLQEQLK	2	102079_KYLLQEQLK_2	1/P36776	1	b	-1	light
1/P36776	581.845	871.525	15.7	1563517_KYLLQEQLK_2	-1	413.8	102079_KYLLQEQLK_2	0	KYLLQEQLK	y7/-0.010	KYLLQEQLK	2	102079_KYLLQEQLK_2	1/P36776	1	y	-1	light
1/P36776	581.845	758.441	15.7	1563516_KYLLQEQLK_2	-1	644	102079_KYLLQEQLK_2	0	KYLLQEQLK	y6/-0.011	KYLLQEQLK	2	102079_KYLLQEQLK_2	1/P36776	1	y	-1	light
1/P36776	581.845	388.255	15.7	1563509_KYLLQEQLK_2	-1	269.3	102079_KYLLQEQLK_2	0	KYLLQEQLK	y3/-0.004	KYLLQEQLK	2	102079_KYLLQEQLK_2	1/P36776	1	y	-1	light
1/P36776	581.845	1034.59	15.7	1563518_KYLLQEQLK_2	-1	910.9	102079_KYLLQEQLK_2	0	KYLLQEQLK	y8/-0.013,b8+18/-0.013	KYLLQEQLK	2	102079_KYLLQEQLK_2	1/P36776	1	y	-1	light
1/P27487	617.994	942.566	65.6	1564149_KYPLLLDVYAGPC(UniMod:4)SQK_3	-1	4506.9	102120_KYPLLLDVYAGPC(UniMod:4)SQK_3	0	KYPLLLDVYAGPCSQK	b8/-0.005	KYPLLLDVYAGPC(UniMod:4)SQK	3	102120_KYPLLLDVYAGPC(UniMod:4)SQK_3	1/P27487	1	b	-1	light
1/P27487	617.994	843.497	65.6	1564145_KYPLLLDVYAGPC(UniMod:4)SQK_3	-1	5140.3	102120_KYPLLLDVYAGPC(UniMod:4)SQK_3	0	KYPLLLDVYAGPCSQK	b7/0.001	KYPLLLDVYAGPC(UniMod:4)SQK	3	102120_KYPLLLDVYAGPC(UniMod:4)SQK_3	1/P27487	1	b	-1	light
1/P27487	617.994	676.308	65.6	1564139_KYPLLLDVYAGPC(UniMod:4)SQK_3	-1	10000	102120_KYPLLLDVYAGPC(UniMod:4)SQK_3	0	KYPLLLDVYAGPCSQK	y6/0.004	KYPLLLDVYAGPC(UniMod:4)SQK	3	102120_KYPLLLDVYAGPC(UniMod:4)SQK_3	1/P27487	1	y	-1	light
1/P27487	617.994	910.409	65.6	1564147_KYPLLLDVYAGPC(UniMod:4)SQK_3	-1	3969.5	102120_KYPLLLDVYAGPC(UniMod:4)SQK_3	0	KYPLLLDVYAGPCSQK	y8/0.002	KYPLLLDVYAGPC(UniMod:4)SQK	3	102120_KYPLLLDVYAGPC(UniMod:4)SQK_3	1/P27487	1	y	-1	light
1/P27487	617.994	615.386	65.6	1564132_KYPLLLDVYAGPC(UniMod:4)SQK_3	-1	2245.9	102120_KYPLLLDVYAGPC(UniMod:4)SQK_3	0	KYPLLLDVYAGPCSQK	b5/0.005	KYPLLLDVYAGPC(UniMod:4)SQK	3	102120_KYPLLLDVYAGPC(UniMod:4)SQK_3	1/P27487	1	b	-1	light
1/P27487	617.994	747.345	65.6	1564141_KYPLLLDVYAGPC(UniMod:4)SQK_3	-1	7530.2	102120_KYPLLLDVYAGPC(UniMod:4)SQK_3	0	KYPLLLDVYAGPCSQK	y7/-0.006	KYPLLLDVYAGPC(UniMod:4)SQK	3	102120_KYPLLLDVYAGPC(UniMod:4)SQK_3	1/P27487	1	y	-1	light
1/Q6V1X1	769.427	403.205	87	1564259_KYPTVLFIYGGPQVQLVNNR_3	-1	6165.9	102128_KYPTVLFIYGGPQVQLVNNR_3	0	KYPTVLFIYGGPQVQLVNNR	y3/0.003	KYPTVLFIYGGPQVQLVNNR	3	102128_KYPTVLFIYGGPQVQLVNNR_3	1/Q6V1X1	1	y	-1	light
1/Q6V1X1	769.427	743.416	87	1564267_KYPTVLFIYGGPQVQLVNNR_3	-1	10000	102128_KYPTVLFIYGGPQVQLVNNR_3	0	KYPTVLFIYGGPQVQLVNNR	y6/-0.002	KYPTVLFIYGGPQVQLVNNR	3	102128_KYPTVLFIYGGPQVQLVNNR_3	1/Q6V1X1	1	y	-1	light
1/Q6V1X1	769.427	842.484	87	1564268_KYPTVLFIYGGPQVQLVNNR_3	-1	8236.6	102128_KYPTVLFIYGGPQVQLVNNR_3	0	KYPTVLFIYGGPQVQLVNNR	y7/-0.003	KYPTVLFIYGGPQVQLVNNR	3	102128_KYPTVLFIYGGPQVQLVNNR_3	1/Q6V1X1	1	y	-1	light
1/Q6V1X1	769.427	1067.6	87	1564271_KYPTVLFIYGGPQVQLVNNR_3	-1	4554.3	102128_KYPTVLFIYGGPQVQLVNNR_3	0	KYPTVLFIYGGPQVQLVNNR	y9/-0.006,y19-44^2/-0.004	KYPTVLFIYGGPQVQLVNNR	3	102128_KYPTVLFIYGGPQVQLVNNR_3	1/Q6V1X1	1	y	-1	light
1/Q6V1X1	769.427	615.357	87	1564264_KYPTVLFIYGGPQVQLVNNR_3	-1	8397.7	102128_KYPTVLFIYGGPQVQLVNNR_3	0	KYPTVLFIYGGPQVQLVNNR	y5/-0.004	KYPTVLFIYGGPQVQLVNNR	3	102128_KYPTVLFIYGGPQVQLVNNR_3	1/Q6V1X1	1	y	-1	light
1/Q6V1X1	769.427	502.273	87	1564260_KYPTVLFIYGGPQVQLVNNR_3	-1	7727.3	102128_KYPTVLFIYGGPQVQLVNNR_3	0	KYPTVLFIYGGPQVQLVNNR	y4/-0.011	KYPTVLFIYGGPQVQLVNNR	3	102128_KYPTVLFIYGGPQVQLVNNR_3	1/Q6V1X1	1	y	-1	light
1/Q13085	526.252	506.209	14	1424805_y5_1_ILSTMDSPST_2	-1	1807.3	102146_ILSTMDSPST_2	0	ILSTMDSPST	y5/-0.000	ILSTMDSPST	2	102146_ILSTMDSPST_2	1/Q13085	1	y	5	light
1/Q13085	526.252	825.329	14	1424811_y8_1_ILSTMDSPST_2	-1	1655.6	102146_ILSTMDSPST_2	0	ILSTMDSPST	y8/-0.006	ILSTMDSPST	2	102146_ILSTMDSPST_2	1/Q13085	1	y	8	light
1/Q13085	526.252	932.439	14	1424812_b9_1_ILSTMDSPST_2	-1	2237.9	102146_ILSTMDSPST_2	0	ILSTMDSPST	b9/-0.002	ILSTMDSPST	2	102146_ILSTMDSPST_2	1/Q13085	1	b	9	light
1/Q13085	526.252	546.296	14	1424806_b5_1_ILSTMDSPST_2	-1	1227.5	102146_ILSTMDSPST_2	0	ILSTMDSPST	b5/0.010	ILSTMDSPST	2	102146_ILSTMDSPST_2	1/Q13085	1	b	5	light
1/Q13085	526.252	661.323	14	1424808_b6_1_ILSTMDSPST_2	-1	3330.1	102146_ILSTMDSPST_2	0	ILSTMDSPST	b6/0.001	ILSTMDSPST	2	102146_ILSTMDSPST_2	1/Q13085	1	b	6	light
1/Q13085	526.252	391.182	14	1424803_y4_1_ILSTMDSPST_2	-1	3853.1	102146_ILSTMDSPST_2	0	ILSTMDSPST	y4/-0.003,y8-44^2/0.006	ILSTMDSPST	2	102146_ILSTMDSPST_2	1/Q13085	1	y	4	light
1/Q86WA8	834.178	748.399	109.1	1564724_KYQLTNAFGSFDLLDNTDIHLHFPAGAVTK_4	-1	4261.5	102156_KYQLTNAFGSFDLLDNTDIHLHFPAGAVTK_4	0	KYQLTNAFGSFDLLDNTDIHLHFPAGAVTK	b6/-0.007	KYQLTNAFGSFDLLDNTDIHLHFPAGAVTK	4	102156_KYQLTNAFGSFDLLDNTDIHLHFPAGAVTK_4	1/Q86WA8	1	b	-1	light
1/Q86WA8	834.178	966.504	109.1	1564731_KYQLTNAFGSFDLLDNTDIHLHFPAGAVTK_4	-1	4840.9	102156_KYQLTNAFGSFDLLDNTDIHLHFPAGAVTK_4	0	KYQLTNAFGSFDLLDNTDIHLHFPAGAVTK	b8/-0.001,y27-17^3/0.016	KYQLTNAFGSFDLLDNTDIHLHFPAGAVTK	4	102156_KYQLTNAFGSFDLLDNTDIHLHFPAGAVTK_4	1/Q86WA8	1	b	-1	light
1/Q86WA8	834.178	819.436	109.1	1564727_KYQLTNAFGSFDLLDNTDIHLHFPAGAVTK_4	-1	5295.5	102156_KYQLTNAFGSFDLLDNTDIHLHFPAGAVTK_4	0	KYQLTNAFGSFDLLDNTDIHLHFPAGAVTK	b7/0.002	KYQLTNAFGSFDLLDNTDIHLHFPAGAVTK	4	102156_KYQLTNAFGSFDLLDNTDIHLHFPAGAVTK_4	1/Q86WA8	1	b	-1	light
1/Q86WA8	834.178	868.442	109.1	1564728_KYQLTNAFGSFDLLDNTDIHLHFPAGAVTK_4	-1	3382.6	102156_KYQLTNAFGSFDLLDNTDIHLHFPAGAVTK_4	0	KYQLTNAFGSFDLLDNTDIHLHFPAGAVTK	y16^2/0.000	KYQLTNAFGSFDLLDNTDIHLHFPAGAVTK	4	102156_KYQLTNAFGSFDLLDNTDIHLHFPAGAVTK_4	1/Q86WA8	2	y	-1	light
1/Q86WA8	834.178	1372.65	109.1	1564736_KYQLTNAFGSFDLLDNTDIHLHFPAGAVTK_4	-1	3772.7	102156_KYQLTNAFGSFDLLDNTDIHLHFPAGAVTK_4	0	KYQLTNAFGSFDLLDNTDIHLHFPAGAVTK	b12/-0.009	KYQLTNAFGSFDLLDNTDIHLHFPAGAVTK	4	102156_KYQLTNAFGSFDLLDNTDIHLHFPAGAVTK_4	1/Q86WA8	1	b	-1	light
1/Q86WA8	834.178	643.377	109.1	1564720_KYQLTNAFGSFDLLDNTDIHLHFPAGAVTK_4	-1	6659.1	102156_KYQLTNAFGSFDLLDNTDIHLHFPAGAVTK_4	0	KYQLTNAFGSFDLLDNTDIHLHFPAGAVTK	y7/0.001	KYQLTNAFGSFDLLDNTDIHLHFPAGAVTK	4	102156_KYQLTNAFGSFDLLDNTDIHLHFPAGAVTK_4	1/Q86WA8	1	y	-1	light
1/Q6YHK3	856.091	1014.49	111.5	1564748_KYQPNIDVQESIHFLESEFSR_3	-1	1539.6	102157_KYQPNIDVQESIHFLESEFSR_3	0	KYQPNIDVQESIHFLESEFSR	y8/0.008	KYQPNIDVQESIHFLESEFSR	3	102157_KYQPNIDVQESIHFLESEFSR_3	1/Q6YHK3	1	y	-1	light
1/Q6YHK3	856.091	1151.55	111.5	1564750_KYQPNIDVQESIHFLESEFSR_3	-1	2155.8	102157_KYQPNIDVQESIHFLESEFSR_3	0	KYQPNIDVQESIHFLESEFSR	y9/-0.007	KYQPNIDVQESIHFLESEFSR	3	102157_KYQPNIDVQESIHFLESEFSR_3	1/Q6YHK3	1	y	-1	light
1/Q6YHK3	856.091	1351.66	111.5	1564752_KYQPNIDVQESIHFLESEFSR_3	-1	1269.8	102157_KYQPNIDVQESIHFLESEFSR_3	0	KYQPNIDVQESIHFLESEFSR	y11/-0.010	KYQPNIDVQESIHFLESEFSR	3	102157_KYQPNIDVQESIHFLESEFSR_3	1/Q6YHK3	1	y	-1	light
1/Q6YHK3	856.091	625.294	111.5	1564743_KYQPNIDVQESIHFLESEFSR_3	-1	1252.5	102157_KYQPNIDVQESIHFLESEFSR_3	0	KYQPNIDVQESIHFLESEFSR	y5/0.004	KYQPNIDVQESIHFLESEFSR	3	102157_KYQPNIDVQESIHFLESEFSR_3	1/Q6YHK3	1	y	-1	light
1/Q6YHK3	856.091	867.421	111.5	1564747_KYQPNIDVQESIHFLESEFSR_3	-1	1932.1	102157_KYQPNIDVQESIHFLESEFSR_3	0	KYQPNIDVQESIHFLESEFSR	y7/0.001	KYQPNIDVQESIHFLESEFSR	3	102157_KYQPNIDVQESIHFLESEFSR_3	1/Q6YHK3	1	y	-1	light
1/Q6YHK3	856.091	420.224	111.5	1564739_KYQPNIDVQESIHFLESEFSR_3	-1	1652.8	102157_KYQPNIDVQESIHFLESEFSR_3	0	KYQPNIDVQESIHFLESEFSR	b3/-0.001,b11-44^3/0.004	KYQPNIDVQESIHFLESEFSR	3	102157_KYQPNIDVQESIHFLESEFSR_3	1/Q6YHK3	1	b	-1	light
1/Q6YHK3	642.32	625.294	111.8	1564764_KYQPNIDVQESIHFLESEFSR_4	-1	6470	102158_KYQPNIDVQESIHFLESEFSR_4	0	KYQPNIDVQESIHFLESEFSR	y5/-0.002	KYQPNIDVQESIHFLESEFSR	4	102158_KYQPNIDVQESIHFLESEFSR_4	1/Q6YHK3	1	y	-1	light
1/Q6YHK3	642.32	420.224	111.8	1564758_KYQPNIDVQESIHFLESEFSR_4	-1	10000	102158_KYQPNIDVQESIHFLESEFSR_4	0	KYQPNIDVQESIHFLESEFSR	b3/0.001,b11-44^3/0.006	KYQPNIDVQESIHFLESEFSR	4	102158_KYQPNIDVQESIHFLESEFSR_4	1/Q6YHK3	1	b	-1	light
1/Q6YHK3	642.32	859.431	111.8	1564776_KYQPNIDVQESIHFLESEFSR_4	-1	9560.4	102158_KYQPNIDVQESIHFLESEFSR_4	0	KYQPNIDVQESIHFLESEFSR	b7/0.001	KYQPNIDVQESIHFLESEFSR	4	102158_KYQPNIDVQESIHFLESEFSR_4	1/Q6YHK3	1	b	-1	light
1/Q6YHK3	642.32	740.857	111.8	1564769_KYQPNIDVQESIHFLESEFSR_4	-1	6423.8	102158_KYQPNIDVQESIHFLESEFSR_4	0	KYQPNIDVQESIHFLESEFSR	y12^2/0.001	KYQPNIDVQESIHFLESEFSR	4	102158_KYQPNIDVQESIHFLESEFSR_4	1/Q6YHK3	2	y	-1	light
1/Q6YHK3	642.32	1014.49	111.8	1564782_KYQPNIDVQESIHFLESEFSR_4	-1	7623.7	102158_KYQPNIDVQESIHFLESEFSR_4	0	KYQPNIDVQESIHFLESEFSR	y8/-0.002	KYQPNIDVQESIHFLESEFSR	4	102158_KYQPNIDVQESIHFLESEFSR_4	1/Q6YHK3	1	y	-1	light
1/Q6YHK3	642.32	867.421	111.8	1564777_KYQPNIDVQESIHFLESEFSR_4	-1	5475	102158_KYQPNIDVQESIHFLESEFSR_4	0	KYQPNIDVQESIHFLESEFSR	y7/-0.002	KYQPNIDVQESIHFLESEFSR	4	102158_KYQPNIDVQESIHFLESEFSR_4	1/Q6YHK3	1	y	-1	light
1/P02787	583.799	800.426	-35.1	99047_y8_1_HQTVPQNTGGK_2	-1	1360.1	10216_HQTVPQNTGGK_2	0	HQTVPQNTGGK	y8/-0.001	HQTVPQNTGGK	2	10216_HQTVPQNTGGK_2	1/P02787	1	y	8	light
1/P02787	583.799	362.203	-35.1	99039_y4_1_HQTVPQNTGGK_2	-1	1606.5	10216_HQTVPQNTGGK_2	0	HQTVPQNTGGK	y4/0.003	HQTVPQNTGGK	2	10216_HQTVPQNTGGK_2	1/P02787	1	y	4	light
1/P02787	583.799	466.241	-35.1	99042_b4_1_HQTVPQNTGGK_2	-1	2183.6	10216_HQTVPQNTGGK_2	0	HQTVPQNTGGK	b4/0.002	HQTVPQNTGGK	2	10216_HQTVPQNTGGK_2	1/P02787	1	b	4	light
1/P02787	583.799	701.358	-35.1	99046_y7_1_HQTVPQNTGGK_2	-1	10000	10216_HQTVPQNTGGK_2	0	HQTVPQNTGGK	y7/0.000	HQTVPQNTGGK	2	10216_HQTVPQNTGGK_2	1/P02787	1	y	7	light
1/P02787	583.799	901.474	-35.1	99049_y9_1_HQTVPQNTGGK_2	-1	4922.4	10216_HQTVPQNTGGK_2	0	HQTVPQNTGGK	y9/-0.001	HQTVPQNTGGK	2	10216_HQTVPQNTGGK_2	1/P02787	1	y	9	light
1/P02787	583.799	476.246	-35.1	99043_y5_1_HQTVPQNTGGK_2	-1	1555.8	10216_HQTVPQNTGGK_2	0	HQTVPQNTGGK	y5/0.002	HQTVPQNTGGK	2	10216_HQTVPQNTGGK_2	1/P02787	1	y	5	light
1/Q9HAT2	1036.03	1139.07	151.8	1425004_y20_2_ILSVSPIQAEQELEDLVAVDLQWSKPTSENLGHGYFK_4	-1	2775.1	102162_ILSVSPIQAEQELEDLVAVDLQWSKPTSENLGHGYFK_4	0	ILSVSPIQAEQELEDLVAVDLQWSKPTSENLGHGYFK	y20^2/0.002	ILSVSPIQAEQELEDLVAVDLQWSKPTSENLGHGYFK	4	102162_ILSVSPIQAEQELEDLVAVDLQWSKPTSENLGHGYFK_4	1/Q9HAT2	2	y	20	light
1/Q9HAT2	1036.03	514.266	151.8	1424994_y4_1_ILSVSPIQAEQELEDLVAVDLQWSKPTSENLGHGYFK_4	-1	2627.2	102162_ILSVSPIQAEQELEDLVAVDLQWSKPTSENLGHGYFK_4	0	ILSVSPIQAEQELEDLVAVDLQWSKPTSENLGHGYFK	y4/-0.005	ILSVSPIQAEQELEDLVAVDLQWSKPTSENLGHGYFK	4	102162_ILSVSPIQAEQELEDLVAVDLQWSKPTSENLGHGYFK_4	1/Q9HAT2	1	y	4	light
1/Q9HAT2	1036.03	1564.78	151.8	1425008_y14_1_ILSVSPIQAEQELEDLVAVDLQWSKPTSENLGHGYFK_4	-1	1853	102162_ILSVSPIQAEQELEDLVAVDLQWSKPTSENLGHGYFK_4	0	ILSVSPIQAEQELEDLVAVDLQWSKPTSENLGHGYFK	y14/0.002	ILSVSPIQAEQELEDLVAVDLQWSKPTSENLGHGYFK	4	102162_ILSVSPIQAEQELEDLVAVDLQWSKPTSENLGHGYFK_4	1/Q9HAT2	1	y	14	light
1/Q9HAT2	1036.03	708.346	151.8	1424999_y6_1_ILSVSPIQAEQELEDLVAVDLQWSKPTSENLGHGYFK_4	-1	2495.4	102162_ILSVSPIQAEQELEDLVAVDLQWSKPTSENLGHGYFK_4	0	ILSVSPIQAEQELEDLVAVDLQWSKPTSENLGHGYFK	y6/0.002	ILSVSPIQAEQELEDLVAVDLQWSKPTSENLGHGYFK	4	102162_ILSVSPIQAEQELEDLVAVDLQWSKPTSENLGHGYFK_4	1/Q9HAT2	1	y	6	light
1/Q9HAT2	1036.03	1349.65	151.8	1425007_y12_1_ILSVSPIQAEQELEDLVAVDLQWSKPTSENLGHGYFK_4	-1	5406.6	102162_ILSVSPIQAEQELEDLVAVDLQWSKPTSENLGHGYFK_4	0	ILSVSPIQAEQELEDLVAVDLQWSKPTSENLGHGYFK	y12/-0.001	ILSVSPIQAEQELEDLVAVDLQWSKPTSENLGHGYFK	4	102162_ILSVSPIQAEQELEDLVAVDLQWSKPTSENLGHGYFK_4	1/Q9HAT2	1	y	12	light
1/Q9HAT2	1036.03	651.325	151.8	1424997_y5_1_ILSVSPIQAEQELEDLVAVDLQWSKPTSENLGHGYFK_4	-1	2310.1	102162_ILSVSPIQAEQELEDLVAVDLQWSKPTSENLGHGYFK_4	0	ILSVSPIQAEQELEDLVAVDLQWSKPTSENLGHGYFK	y5/-0.002	ILSVSPIQAEQELEDLVAVDLQWSKPTSENLGHGYFK	4	102162_ILSVSPIQAEQELEDLVAVDLQWSKPTSENLGHGYFK_4	1/Q9HAT2	1	y	5	light
1/P29144	860.066	1084.5	75	1565038_KYSDPGPVYDC(UniMod:4)LVWHDGEVWR_3	-1	8321.8	102172_KYSDPGPVYDC(UniMod:4)LVWHDGEVWR_3	0	KYSDPGPVYDCLVWHDGEVWR	y8/-0.018	KYSDPGPVYDC(UniMod:4)LVWHDGEVWR	3	102172_KYSDPGPVYDC(UniMod:4)LVWHDGEVWR_3	1/P29144	1	y	-1	light
1/P29144	860.066	761.358	75	1565035_KYSDPGPVYDC(UniMod:4)LVWHDGEVWR_3	-1	7568.3	102172_KYSDPGPVYDC(UniMod:4)LVWHDGEVWR_3	0	KYSDPGPVYDCLVWHDGEVWR	y6/-0.006	KYSDPGPVYDC(UniMod:4)LVWHDGEVWR	3	102172_KYSDPGPVYDC(UniMod:4)LVWHDGEVWR_3	1/P29144	1	y	-1	light
1/P29144	860.066	646.331	75	1565032_KYSDPGPVYDC(UniMod:4)LVWHDGEVWR_3	-1	7037.3	102172_KYSDPGPVYDC(UniMod:4)LVWHDGEVWR_3	0	KYSDPGPVYDCLVWHDGEVWR	y5/-0.013	KYSDPGPVYDC(UniMod:4)LVWHDGEVWR	3	102172_KYSDPGPVYDC(UniMod:4)LVWHDGEVWR_3	1/P29144	1	y	-1	light
1/P29144	860.066	1042.99	75	1565037_KYSDPGPVYDC(UniMod:4)LVWHDGEVWR_3	-1	4057.2	102172_KYSDPGPVYDC(UniMod:4)LVWHDGEVWR_3	0	KYSDPGPVYDCLVWHDGEVWR	y17^2/-0.019	KYSDPGPVYDC(UniMod:4)LVWHDGEVWR	3	102172_KYSDPGPVYDC(UniMod:4)LVWHDGEVWR_3	1/P29144	2	y	-1	light
1/P29144	860.066	494.225	75	1565031_KYSDPGPVYDC(UniMod:4)LVWHDGEVWR_3	-1	5692.3	102172_KYSDPGPVYDC(UniMod:4)LVWHDGEVWR_3	0	KYSDPGPVYDCLVWHDGEVWR	b4/-0.003,y12-91^3/-0.015	KYSDPGPVYDC(UniMod:4)LVWHDGEVWR	3	102172_KYSDPGPVYDC(UniMod:4)LVWHDGEVWR_3	1/P29144	1	b	-1	light
1/P29144	860.066	898.417	75	1565036_KYSDPGPVYDC(UniMod:4)LVWHDGEVWR_3	-1	9177.8	102172_KYSDPGPVYDC(UniMod:4)LVWHDGEVWR_3	0	KYSDPGPVYDCLVWHDGEVWR	y7/-0.001	KYSDPGPVYDC(UniMod:4)LVWHDGEVWR	3	102172_KYSDPGPVYDC(UniMod:4)LVWHDGEVWR_3	1/P29144	1	y	-1	light
1/P29144	645.301	844.42	75.1	1565063_KYSDPGPVYDC(UniMod:4)LVWHDGEVWR_4	-1	2903.3	102173_KYSDPGPVYDC(UniMod:4)LVWHDGEVWR_4	0	KYSDPGPVYDCLVWHDGEVWR	b8/-0.004	KYSDPGPVYDC(UniMod:4)LVWHDGEVWR	4	102173_KYSDPGPVYDC(UniMod:4)LVWHDGEVWR_4	1/P29144	1	b	-1	light
1/P29144	645.301	373.179	75.1	1565043_KYSDPGPVYDC(UniMod:4)LVWHDGEVWR_4	-1	3774.5	102173_KYSDPGPVYDC(UniMod:4)LVWHDGEVWR_4	0	KYSDPGPVYDCLVWHDGEVWR	b7^2/0.005	KYSDPGPVYDC(UniMod:4)LVWHDGEVWR	4	102173_KYSDPGPVYDC(UniMod:4)LVWHDGEVWR_4	1/P29144	2	b	-1	light
1/P29144	645.301	1084.5	75.1	1565071_KYSDPGPVYDC(UniMod:4)LVWHDGEVWR_4	-1	3741.5	102173_KYSDPGPVYDC(UniMod:4)LVWHDGEVWR_4	0	KYSDPGPVYDCLVWHDGEVWR	y8/-0.015	KYSDPGPVYDC(UniMod:4)LVWHDGEVWR	4	102173_KYSDPGPVYDC(UniMod:4)LVWHDGEVWR_4	1/P29144	1	y	-1	light
1/P29144	645.301	648.299	75.1	1565054_KYSDPGPVYDC(UniMod:4)LVWHDGEVWR_4	-1	10000	102173_KYSDPGPVYDC(UniMod:4)LVWHDGEVWR_4	0	KYSDPGPVYDCLVWHDGEVWR	b6/-0.009	KYSDPGPVYDC(UniMod:4)LVWHDGEVWR	4	102173_KYSDPGPVYDC(UniMod:4)LVWHDGEVWR_4	1/P29144	1	b	-1	light
1/P29144	645.301	494.225	75.1	1565047_KYSDPGPVYDC(UniMod:4)LVWHDGEVWR_4	-1	4070.4	102173_KYSDPGPVYDC(UniMod:4)LVWHDGEVWR_4	0	KYSDPGPVYDCLVWHDGEVWR	b4/-0.000,y12-91^3/-0.013	KYSDPGPVYDC(UniMod:4)LVWHDGEVWR	4	102173_KYSDPGPVYDC(UniMod:4)LVWHDGEVWR_4	1/P29144	1	b	-1	light
1/P29144	645.301	867.888	75.1	1565067_KYSDPGPVYDC(UniMod:4)LVWHDGEVWR_4	-1	3743.8	102173_KYSDPGPVYDC(UniMod:4)LVWHDGEVWR_4	0	KYSDPGPVYDCLVWHDGEVWR	[y13^2/0.012]	KYSDPGPVYDC(UniMod:4)LVWHDGEVWR	4	102173_KYSDPGPVYDC(UniMod:4)LVWHDGEVWR_4	1/P29144	2	y	-1	light
1/P02787	658.998	466.241	-0.1	99068_b4_1_HQTVPQNTGGKNPDPWAK_3	-1	5131.9	10218_HQTVPQNTGGKNPDPWAK_3	0	HQTVPQNTGGKNPDPWAK	b4/-0.013,y4-35/-0.017	HQTVPQNTGGKNPDPWAK	3	10218_HQTVPQNTGGKNPDPWAK_3	1/P02787	1	b	4	light
1/P02787	658.998	827.405	-0.1	99073_y7_1_HQTVPQNTGGKNPDPWAK_3	-1	1175.1	10218_HQTVPQNTGGKNPDPWAK_3	0	HQTVPQNTGGKNPDPWAK	y7/-0.001	HQTVPQNTGGKNPDPWAK	3	10218_HQTVPQNTGGKNPDPWAK_3	1/P02787	1	y	7	light
1/P02787	658.998	367.172	-0.1	99065_b3_1_HQTVPQNTGGKNPDPWAK_3	-1	1151.1	10218_HQTVPQNTGGKNPDPWAK_3	0	HQTVPQNTGGKNPDPWAK	b3/0.004	HQTVPQNTGGKNPDPWAK	3	10218_HQTVPQNTGGKNPDPWAK_3	1/P02787	1	b	3	light
1/P02787	658.998	482.236	-0.1	99069_b9_2_HQTVPQNTGGKNPDPWAK_3	-1	1175.1	10218_HQTVPQNTGGKNPDPWAK_3	0	HQTVPQNTGGKNPDPWAK	b9^2/-0.009	HQTVPQNTGGKNPDPWAK	3	10218_HQTVPQNTGGKNPDPWAK_3	1/P02787	2	b	9	light
1/P02787	658.998	713.362	-0.1	99072_y6_1_HQTVPQNTGGKNPDPWAK_3	-1	1510.8	10218_HQTVPQNTGGKNPDPWAK_3	0	HQTVPQNTGGKNPDPWAK	y6/-0.015	HQTVPQNTGGKNPDPWAK	3	10218_HQTVPQNTGGKNPDPWAK_3	1/P02787	1	y	6	light
1/P02787	658.998	501.282	-0.1	99070_y4_1_HQTVPQNTGGKNPDPWAK_3	-1	8644.6	10218_HQTVPQNTGGKNPDPWAK_3	0	HQTVPQNTGGKNPDPWAK	y4/0.005	HQTVPQNTGGKNPDPWAK	3	10218_HQTVPQNTGGKNPDPWAK_3	1/P02787	1	y	4	light
1/P60900	932.512	1094.6	89.4	1425434_y10_1_ILTEAEIDAHLVALAER_2	-1	3559.1	102190_ILTEAEIDAHLVALAER_2	0	ILTEAEIDAHLVALAER	y10/-0.012	ILTEAEIDAHLVALAER	2	102190_ILTEAEIDAHLVALAER_2	1/P60900	1	y	10	light
1/P60900	932.512	979.568	89.4	1425432_y9_1_ILTEAEIDAHLVALAER_2	-1	2881.8	102190_ILTEAEIDAHLVALAER_2	0	ILTEAEIDAHLVALAER	y9/-0.008	ILTEAEIDAHLVALAER	2	102190_ILTEAEIDAHLVALAER_2	1/P60900	1	y	9	light
1/P60900	932.512	771.472	89.4	1425429_y7_1_ILTEAEIDAHLVALAER_2	-1	1275.2	102190_ILTEAEIDAHLVALAER_2	0	ILTEAEIDAHLVALAER	y7/-0.001	ILTEAEIDAHLVALAER	2	102190_ILTEAEIDAHLVALAER_2	1/P60900	1	y	7	light
1/P60900	932.512	819.428	89.4	1425430_y15_2_ILTEAEIDAHLVALAER_2	-1	1282.4	102190_ILTEAEIDAHLVALAER_2	0	ILTEAEIDAHLVALAER	y15^2/-0.005	ILTEAEIDAHLVALAER	2	102190_ILTEAEIDAHLVALAER_2	1/P60900	2	y	15	light
1/P60900	932.512	908.531	89.4	1425431_y8_1_ILTEAEIDAHLVALAER_2	-1	1750.7	102190_ILTEAEIDAHLVALAER_2	0	ILTEAEIDAHLVALAER	y8/-0.014	ILTEAEIDAHLVALAER	2	102190_ILTEAEIDAHLVALAER_2	1/P60900	1	y	8	light
1/P60900	932.512	1206.64	89.4	1425435_b11_1_ILTEAEIDAHLVALAER_2	-1	1273.5	102190_ILTEAEIDAHLVALAER_2	0	ILTEAEIDAHLVALAER	b11/-0.007	ILTEAEIDAHLVALAER	2	102190_ILTEAEIDAHLVALAER_2	1/P60900	1	b	11	light
1/P60900	622.011	704.383	90	1425449_y13_2_ILTEAEIDAHLVALAER_3	-1	3445	102191_ILTEAEIDAHLVALAER_3	0	ILTEAEIDAHLVALAER	y13^2/-0.004	ILTEAEIDAHLVALAER	3	102191_ILTEAEIDAHLVALAER_3	1/P60900	2	y	13	light
1/P60900	622.011	1094.6	90	1425458_y10_1_ILTEAEIDAHLVALAER_3	-1	2917.2	102191_ILTEAEIDAHLVALAER_3	0	ILTEAEIDAHLVALAER	y10/-0.008	ILTEAEIDAHLVALAER	3	102191_ILTEAEIDAHLVALAER_3	1/P60900	1	y	10	light
1/P60900	622.011	559.32	90	1425444_y5_1_ILTEAEIDAHLVALAER_3	-1	2988	102191_ILTEAEIDAHLVALAER_3	0	ILTEAEIDAHLVALAER	y5/-0.003	ILTEAEIDAHLVALAER	3	102191_ILTEAEIDAHLVALAER_3	1/P60900	1	y	5	light
1/P60900	622.011	658.388	90	1425446_y6_1_ILTEAEIDAHLVALAER_3	-1	4169.2	102191_ILTEAEIDAHLVALAER_3	0	ILTEAEIDAHLVALAER	y6/-0.007	ILTEAEIDAHLVALAER	3	102191_ILTEAEIDAHLVALAER_3	1/P60900	1	y	6	light
1/P60900	622.011	819.428	90	1425454_y15_2_ILTEAEIDAHLVALAER_3	-1	10000	102191_ILTEAEIDAHLVALAER_3	0	ILTEAEIDAHLVALAER	y15^2/-0.005	ILTEAEIDAHLVALAER	3	102191_ILTEAEIDAHLVALAER_3	1/P60900	2	y	15	light
1/P60900	622.011	771.472	90	1425451_y7_1_ILTEAEIDAHLVALAER_3	-1	3707	102191_ILTEAEIDAHLVALAER_3	0	ILTEAEIDAHLVALAER	y7/-0.010	ILTEAEIDAHLVALAER	3	102191_ILTEAEIDAHLVALAER_3	1/P60900	1	y	7	light
1/P60900	990.026	1209.62	92.4	1425472_y11_1_ILTEAEIDAHLVALAERD_2	-1	3506.9	102192_ILTEAEIDAHLVALAERD_2	0	ILTEAEIDAHLVALAERD	y11/-0.012	ILTEAEIDAHLVALAERD	2	102192_ILTEAEIDAHLVALAERD_2	1/P60900	1	y	11	light
1/P60900	990.026	886.499	92.4	1425468_y8_1_ILTEAEIDAHLVALAERD_2	-1	3332.7	102192_ILTEAEIDAHLVALAERD_2	0	ILTEAEIDAHLVALAERD	y8/-0.002	ILTEAEIDAHLVALAERD	2	102192_ILTEAEIDAHLVALAERD_2	1/P60900	1	y	8	light
1/P60900	990.026	773.415	92.4	1425467_y7_1_ILTEAEIDAHLVALAERD_2	-1	2944.2	102192_ILTEAEIDAHLVALAERD_2	0	ILTEAEIDAHLVALAERD	y7/-0.007	ILTEAEIDAHLVALAERD	2	102192_ILTEAEIDAHLVALAERD_2	1/P60900	1	y	7	light
1/P60900	990.026	1023.56	92.4	1425469_y9_1_ILTEAEIDAHLVALAERD_2	-1	2419.6	102192_ILTEAEIDAHLVALAERD_2	0	ILTEAEIDAHLVALAERD	y9/-0.009	ILTEAEIDAHLVALAERD	2	102192_ILTEAEIDAHLVALAERD_2	1/P60900	1	y	9	light
1/P60900	990.026	1094.6	92.4	1425471_y10_1_ILTEAEIDAHLVALAERD_2	-1	3162	102192_ILTEAEIDAHLVALAERD_2	0	ILTEAEIDAHLVALAERD	y10/-0.006	ILTEAEIDAHLVALAERD	2	102192_ILTEAEIDAHLVALAERD_2	1/P60900	1	y	10	light
1/P60900	990.026	674.347	92.4	1425465_y6_1_ILTEAEIDAHLVALAERD_2	-1	2848.1	102192_ILTEAEIDAHLVALAERD_2	0	ILTEAEIDAHLVALAERD	y6/-0.008	ILTEAEIDAHLVALAERD	2	102192_ILTEAEIDAHLVALAERD_2	1/P60900	1	y	6	light
1/P60900	660.353	773.415	92.3	1425490_y7_1_ILTEAEIDAHLVALAERD_3	-1	4709.9	102193_ILTEAEIDAHLVALAERD_3	0	ILTEAEIDAHLVALAERD	y7/-0.001	ILTEAEIDAHLVALAERD	3	102193_ILTEAEIDAHLVALAERD_3	1/P60900	1	y	7	light
1/P60900	660.353	674.347	92.3	1425484_y6_1_ILTEAEIDAHLVALAERD_3	-1	4424.3	102193_ILTEAEIDAHLVALAERD_3	0	ILTEAEIDAHLVALAERD	y6/-0.001	ILTEAEIDAHLVALAERD	3	102193_ILTEAEIDAHLVALAERD_3	1/P60900	1	y	6	light
1/P60900	660.353	876.942	92.3	1425493_y16_2_ILTEAEIDAHLVALAERD_3	-1	9256	102193_ILTEAEIDAHLVALAERD_3	0	ILTEAEIDAHLVALAERD	y16^2/-0.001	ILTEAEIDAHLVALAERD	3	102193_ILTEAEIDAHLVALAERD_3	1/P60900	2	y	16	light
1/P60900	660.353	761.897	92.3	1425487_y14_2_ILTEAEIDAHLVALAERD_3	-1	3242.4	102193_ILTEAEIDAHLVALAERD_3	0	ILTEAEIDAHLVALAERD	y14^2/-0.001	ILTEAEIDAHLVALAERD	3	102193_ILTEAEIDAHLVALAERD_3	1/P60900	2	y	14	light
1/P60900	660.353	1023.56	92.3	1425499_y9_1_ILTEAEIDAHLVALAERD_3	-1	2114.2	102193_ILTEAEIDAHLVALAERD_3	0	ILTEAEIDAHLVALAERD	y9/-0.001	ILTEAEIDAHLVALAERD	3	102193_ILTEAEIDAHLVALAERD_3	1/P60900	1	y	9	light
1/P60900	660.353	886.499	92.3	1425495_y8_1_ILTEAEIDAHLVALAERD_3	-1	3662.7	102193_ILTEAEIDAHLVALAERD_3	0	ILTEAEIDAHLVALAERD	y8/-0.003	ILTEAEIDAHLVALAERD	3	102193_ILTEAEIDAHLVALAERD_3	1/P60900	1	y	8	light
1/P05156	576.279	860.393	-33.5	1565747_KYTHLSC(UniMod:4)DK_2	-1	1468.4	102212_KYTHLSC(UniMod:4)DK_2	0	KYTHLSCDK	y7/0.002	KYTHLSC(UniMod:4)DK	2	102212_KYTHLSC(UniMod:4)DK_2	1/P05156	1	y	-1	light
1/P05156	576.279	1023.46	-33.5	1565750_KYTHLSC(UniMod:4)DK_2	-1	616.9	102212_KYTHLSC(UniMod:4)DK_2	0	KYTHLSCDK	y8/0.006,b8+18/0.006	KYTHLSC(UniMod:4)DK	2	102212_KYTHLSC(UniMod:4)DK_2	1/P05156	1	y	-1	light
1/P05156	576.279	1005.45	-33.5	1565749_KYTHLSC(UniMod:4)DK_2	-1	492.9	102212_KYTHLSC(UniMod:4)DK_2	0	KYTHLSCDK	b8/0.010,y8-18/0.010	KYTHLSC(UniMod:4)DK	2	102212_KYTHLSC(UniMod:4)DK_2	1/P05156	1	b	-1	light
1/P05156	576.279	759.345	-33.5	1565746_KYTHLSC(UniMod:4)DK_2	-1	804.1	102212_KYTHLSC(UniMod:4)DK_2	0	KYTHLSCDK	y6/0.003	KYTHLSC(UniMod:4)DK	2	102212_KYTHLSC(UniMod:4)DK_2	1/P05156	1	y	-1	light
1/P05156	576.279	509.202	-33.5	1565740_KYTHLSC(UniMod:4)DK_2	-1	1457.3	102212_KYTHLSC(UniMod:4)DK_2	0	KYTHLSCDK	y4/0.003	KYTHLSC(UniMod:4)DK	2	102212_KYTHLSC(UniMod:4)DK_2	1/P05156	1	y	-1	light
1/P05156	576.279	622.286	-33.5	1565743_KYTHLSC(UniMod:4)DK_2	-1	1080.5	102212_KYTHLSC(UniMod:4)DK_2	0	KYTHLSCDK	y5/0.001	KYTHLSC(UniMod:4)DK	2	102212_KYTHLSC(UniMod:4)DK_2	1/P05156	1	y	-1	light
1/Q9H6V9	774.891	1120.51	4.5	1426486_y10_1_ILTTSEDSNAQEIK_2	-1	6070.6	102269_ILTTSEDSNAQEIK_2	0	ILTTSEDSNAQEIK	y10/-0.005	ILTTSEDSNAQEIK	2	102269_ILTTSEDSNAQEIK_2	1/Q9H6V9	1	y	10	light
1/Q9H6V9	774.891	1322.61	4.5	1426488_y12_1_ILTTSEDSNAQEIK_2	-1	5954.6	102269_ILTTSEDSNAQEIK_2	0	ILTTSEDSNAQEIK	[y12/-0.019]	ILTTSEDSNAQEIK	2	102269_ILTTSEDSNAQEIK_2	1/Q9H6V9	1	y	12	light
1/Q9H6V9	774.891	904.437	4.5	1426483_y8_1_ILTTSEDSNAQEIK_2	-1	3393.4	102269_ILTTSEDSNAQEIK_2	0	ILTTSEDSNAQEIK	y8/0.002	ILTTSEDSNAQEIK	2	102269_ILTTSEDSNAQEIK_2	1/Q9H6V9	1	y	8	light
1/Q9H6V9	774.891	1221.56	4.5	1426487_y11_1_ILTTSEDSNAQEIK_2	-1	4494.2	102269_ILTTSEDSNAQEIK_2	0	ILTTSEDSNAQEIK	y11/0.007	ILTTSEDSNAQEIK	2	102269_ILTTSEDSNAQEIK_2	1/Q9H6V9	1	y	11	light
1/Q9H6V9	774.891	1033.48	4.5	1426484_y9_1_ILTTSEDSNAQEIK_2	-1	3519.7	102269_ILTTSEDSNAQEIK_2	0	ILTTSEDSNAQEIK	y9/0.004	ILTTSEDSNAQEIK	2	102269_ILTTSEDSNAQEIK_2	1/Q9H6V9	1	y	9	light
1/Q9H6V9	774.891	789.41	4.5	1426481_y7_1_ILTTSEDSNAQEIK_2	-1	3047.9	102269_ILTTSEDSNAQEIK_2	0	ILTTSEDSNAQEIK	y7/-0.003	ILTTSEDSNAQEIK	2	102269_ILTTSEDSNAQEIK_2	1/Q9H6V9	1	y	7	light
1/P00734	984.949	1440.62	37.2	1567336_LAAC(UniMod:4)LEGNC(UniMod:4)AEGLGTNYR_2	-1	6576.8	102303_LAAC(UniMod:4)LEGNC(UniMod:4)AEGLGTNYR_2	0	LAACLEGNCAEGLGTNYR	y13/0.004	LAAC(UniMod:4)LEGNC(UniMod:4)AEGLGTNYR	2	102303_LAAC(UniMod:4)LEGNC(UniMod:4)AEGLGTNYR_2	1/P00734	1	y	-1	light
1/P00734	984.949	1140.51	37.2	1567333_LAAC(UniMod:4)LEGNC(UniMod:4)AEGLGTNYR_2	-1	4724.6	102303_LAAC(UniMod:4)LEGNC(UniMod:4)AEGLGTNYR_2	0	LAACLEGNCAEGLGTNYR	y10/-0.010	LAAC(UniMod:4)LEGNC(UniMod:4)AEGLGTNYR	2	102303_LAAC(UniMod:4)LEGNC(UniMod:4)AEGLGTNYR_2	1/P00734	1	y	-1	light
1/P00734	984.949	909.442	37.2	1567330_LAAC(UniMod:4)LEGNC(UniMod:4)AEGLGTNYR_2	-1	3759.6	102303_LAAC(UniMod:4)LEGNC(UniMod:4)AEGLGTNYR_2	0	LAACLEGNCAEGLGTNYR	y8/0.003	LAAC(UniMod:4)LEGNC(UniMod:4)AEGLGTNYR	2	102303_LAAC(UniMod:4)LEGNC(UniMod:4)AEGLGTNYR_2	1/P00734	1	y	-1	light
1/P00734	984.949	1311.57	37.2	1567335_LAAC(UniMod:4)LEGNC(UniMod:4)AEGLGTNYR_2	-1	10000	102303_LAAC(UniMod:4)LEGNC(UniMod:4)AEGLGTNYR_2	0	LAACLEGNCAEGLGTNYR	y12/-0.002	LAAC(UniMod:4)LEGNC(UniMod:4)AEGLGTNYR	2	102303_LAAC(UniMod:4)LEGNC(UniMod:4)AEGLGTNYR_2	1/P00734	1	y	-1	light
1/P00734	984.949	780.4	37.2	1567328_LAAC(UniMod:4)LEGNC(UniMod:4)AEGLGTNYR_2	-1	9189.4	102303_LAAC(UniMod:4)LEGNC(UniMod:4)AEGLGTNYR_2	0	LAACLEGNCAEGLGTNYR	y7/-0.008	LAAC(UniMod:4)LEGNC(UniMod:4)AEGLGTNYR	2	102303_LAAC(UniMod:4)LEGNC(UniMod:4)AEGLGTNYR_2	1/P00734	1	y	-1	light
1/P00734	984.949	610.294	37.2	1567323_LAAC(UniMod:4)LEGNC(UniMod:4)AEGLGTNYR_2	-1	9492.2	102303_LAAC(UniMod:4)LEGNC(UniMod:4)AEGLGTNYR_2	0	LAACLEGNCAEGLGTNYR	y5/-0.002	LAAC(UniMod:4)LEGNC(UniMod:4)AEGLGTNYR	2	102303_LAAC(UniMod:4)LEGNC(UniMod:4)AEGLGTNYR_2	1/P00734	1	y	-1	light
1/P00734	656.968	1246.52	37.2	1567356_LAAC(UniMod:4)LEGNC(UniMod:4)AEGLGTNYR_3	-1	2182.9	102304_LAAC(UniMod:4)LEGNC(UniMod:4)AEGLGTNYR_3	0	LAACLEGNCAEGLGTNYR	b12/-0.006	LAAC(UniMod:4)LEGNC(UniMod:4)AEGLGTNYR	3	102304_LAAC(UniMod:4)LEGNC(UniMod:4)AEGLGTNYR_3	1/P00734	1	b	-1	light
1/P00734	656.968	553.273	37.2	1567341_LAAC(UniMod:4)LEGNC(UniMod:4)AEGLGTNYR_3	-1	1825.9	102304_LAAC(UniMod:4)LEGNC(UniMod:4)AEGLGTNYR_3	0	LAACLEGNCAEGLGTNYR	y4/-0.005	LAAC(UniMod:4)LEGNC(UniMod:4)AEGLGTNYR	3	102304_LAAC(UniMod:4)LEGNC(UniMod:4)AEGLGTNYR_3	1/P00734	1	y	-1	light
1/P00734	656.968	610.294	37.2	1567342_LAAC(UniMod:4)LEGNC(UniMod:4)AEGLGTNYR_3	-1	10000	102304_LAAC(UniMod:4)LEGNC(UniMod:4)AEGLGTNYR_3	0	LAACLEGNCAEGLGTNYR	y5/-0.003	LAAC(UniMod:4)LEGNC(UniMod:4)AEGLGTNYR	3	102304_LAAC(UniMod:4)LEGNC(UniMod:4)AEGLGTNYR_3	1/P00734	1	y	-1	light
1/P00734	656.968	780.4	37.2	1567349_LAAC(UniMod:4)LEGNC(UniMod:4)AEGLGTNYR_3	-1	6061.6	102304_LAAC(UniMod:4)LEGNC(UniMod:4)AEGLGTNYR_3	0	LAACLEGNCAEGLGTNYR	y7/0.001	LAAC(UniMod:4)LEGNC(UniMod:4)AEGLGTNYR	3	102304_LAAC(UniMod:4)LEGNC(UniMod:4)AEGLGTNYR_3	1/P00734	1	y	-1	light
1/P00734	656.968	909.442	37.2	1567352_LAAC(UniMod:4)LEGNC(UniMod:4)AEGLGTNYR_3	-1	3638.5	102304_LAAC(UniMod:4)LEGNC(UniMod:4)AEGLGTNYR_3	0	LAACLEGNCAEGLGTNYR	y8/-0.006	LAAC(UniMod:4)LEGNC(UniMod:4)AEGLGTNYR	3	102304_LAAC(UniMod:4)LEGNC(UniMod:4)AEGLGTNYR_3	1/P00734	1	y	-1	light
1/P00734	656.968	416.196	37.2	1567337_LAAC(UniMod:4)LEGNC(UniMod:4)AEGLGTNYR_3	-1	1825.9	102304_LAAC(UniMod:4)LEGNC(UniMod:4)AEGLGTNYR_3	0	LAACLEGNCAEGLGTNYR	b4/0.001,b12^3/0.020,m2:5/0.001	LAAC(UniMod:4)LEGNC(UniMod:4)AEGLGTNYR	3	102304_LAAC(UniMod:4)LEGNC(UniMod:4)AEGLGTNYR_3	1/P00734	1	b	-1	light
1/P28072	558.306	747.363	7.8	1568225_LAAIAESGVER_2	-1	10000	102366_LAAIAESGVER_2	0	LAAIAESGVER	y7/-0.001	LAAIAESGVER	2	102366_LAAIAESGVER_2	1/P28072	1	y	-1	light
1/P28072	558.306	369.25	7.8	1568214_LAAIAESGVER_2	-1	1145.9	102366_LAAIAESGVER_2	0	LAAIAESGVER	b4/0.000	LAAIAESGVER	2	102366_LAAIAESGVER_2	1/P28072	1	b	-1	light
1/P28072	558.306	547.283	7.8	1568220_LAAIAESGVER_2	-1	2863.2	102366_LAAIAESGVER_2	0	LAAIAESGVER	y5/-0.001	LAAIAESGVER	2	102366_LAAIAESGVER_2	1/P28072	1	y	-1	light
1/P28072	558.306	931.484	7.8	1568228_LAAIAESGVER_2	-1	3263.5	102366_LAAIAESGVER_2	0	LAAIAESGVER	y9/-0.001	LAAIAESGVER	2	102366_LAAIAESGVER_2	1/P28072	1	y	-1	light
1/P28072	558.306	676.326	7.8	1568224_LAAIAESGVER_2	-1	3270.7	102366_LAAIAESGVER_2	0	LAAIAESGVER	y6/-0.002	LAAIAESGVER	2	102366_LAAIAESGVER_2	1/P28072	1	y	-1	light
1/P28072	558.306	860.447	7.8	1568226_LAAIAESGVER_2	-1	2483.8	102366_LAAIAESGVER_2	0	LAAIAESGVER	y8/-0.004	LAAIAESGVER	2	102366_LAAIAESGVER_2	1/P28072	1	y	-1	light
1/P28072	736.418	819.962	64.4	1568240_LAAIAESGVERQVLLGDQIPK_3	-1	1378.6	102367_LAAIAESGVERQVLLGDQIPK_3	0	LAAIAESGVERQVLLGDQIPK	y15^2/-0.016	LAAIAESGVERQVLLGDQIPK	3	102367_LAAIAESGVERQVLLGDQIPK_3	1/P28072	2	y	-1	light
1/P28072	736.418	920.002	64.4	1568243_LAAIAESGVERQVLLGDQIPK_3	-1	2035.7	102367_LAAIAESGVERQVLLGDQIPK_3	0	LAAIAESGVERQVLLGDQIPK	y17^2/0.010	LAAIAESGVERQVLLGDQIPK	3	102367_LAAIAESGVERQVLLGDQIPK_3	1/P28072	2	y	-1	light
1/P28072	736.418	369.25	64.4	1568230_LAAIAESGVERQVLLGDQIPK_3	-1	1421.1	102367_LAAIAESGVERQVLLGDQIPK_3	0	LAAIAESGVERQVLLGDQIPK	b4/0.008	LAAIAESGVERQVLLGDQIPK	3	102367_LAAIAESGVERQVLLGDQIPK_3	1/P28072	1	b	-1	light
1/P28072	736.418	883.525	64.4	1568241_LAAIAESGVERQVLLGDQIPK_3	-1	1557.1	102367_LAAIAESGVERQVLLGDQIPK_3	0	LAAIAESGVERQVLLGDQIPK	y8/0.006	LAAIAESGVERQVLLGDQIPK	3	102367_LAAIAESGVERQVLLGDQIPK_3	1/P28072	1	y	-1	light
1/P28072	736.418	657.357	64.4	1568233_LAAIAESGVERQVLLGDQIPK_3	-1	1328.6	102367_LAAIAESGVERQVLLGDQIPK_3	0	LAAIAESGVERQVLLGDQIPK	y6/-0.004	LAAIAESGVERQVLLGDQIPK	3	102367_LAAIAESGVERQVLLGDQIPK_3	1/P28072	1	y	-1	light
1/P28072	736.418	775.949	64.4	1568239_LAAIAESGVERQVLLGDQIPK_3	-1	1356.3	102367_LAAIAESGVERQVLLGDQIPK_3	0	LAAIAESGVERQVLLGDQIPK	b15^2/0.002	LAAIAESGVERQVLLGDQIPK	3	102367_LAAIAESGVERQVLLGDQIPK_3	1/P28072	2	b	-1	light
1/P42785	629.695	485.308	67.1	156534_ALGSLHLPTNPTSLPAVAK_3	-1	4075.6	10238_ALGSLHLPTNPTSLPAVAK_3	0	ALGSLHLPTNPTSLPAVAK	y5/-0.002	ALGSLHLPTNPTSLPAVAK	3	10238_ALGSLHLPTNPTSLPAVAK_3	1/P42785	1	y	-1	light
1/P42785	629.695	1004.55	67.1	156544_ALGSLHLPTNPTSLPAVAK_3	-1	2597.8	10238_ALGSLHLPTNPTSLPAVAK_3	0	ALGSLHLPTNPTSLPAVAK	b10/-0.017	ALGSLHLPTNPTSLPAVAK	3	10238_ALGSLHLPTNPTSLPAVAK_3	1/P42785	1	b	-1	light
1/P42785	629.695	883.525	67.1	156543_ALGSLHLPTNPTSLPAVAK_3	-1	3039.1	10238_ALGSLHLPTNPTSLPAVAK_3	0	ALGSLHLPTNPTSLPAVAK	y9/0.012	ALGSLHLPTNPTSLPAVAK	3	10238_ALGSLHLPTNPTSLPAVAK_3	1/P42785	1	y	-1	light
1/P42785	629.695	442.266	67.1	156531_ALGSLHLPTNPTSLPAVAK_3	-1	3263.5	10238_ALGSLHLPTNPTSLPAVAK_3	0	ALGSLHLPTNPTSLPAVAK	y9^2/-0.010,b5/-0.010	ALGSLHLPTNPTSLPAVAK	3	10238_ALGSLHLPTNPTSLPAVAK_3	1/P42785	2	y	-1	light
1/P42785	629.695	692.409	67.1	156540_ALGSLHLPTNPTSLPAVAK_3	-1	3532.9	10238_ALGSLHLPTNPTSLPAVAK_3	0	ALGSLHLPTNPTSLPAVAK	b7/0.014	ALGSLHLPTNPTSLPAVAK	3	10238_ALGSLHLPTNPTSLPAVAK_3	1/P42785	1	b	-1	light
1/P42785	629.695	685.424	67.1	156539_ALGSLHLPTNPTSLPAVAK_3	-1	3293.4	10238_ALGSLHLPTNPTSLPAVAK_3	0	ALGSLHLPTNPTSLPAVAK	y7/0.006	ALGSLHLPTNPTSLPAVAK	3	10238_ALGSLHLPTNPTSLPAVAK_3	1/P42785	1	y	-1	light
1/Q5VWZ2	646.998	756.404	37.1	99323_b7_1_HSASLIFLHGSGDSGQGLR_3	-1	721.9	10239_HSASLIFLHGSGDSGQGLR_3	0	HSASLIFLHGSGDSGQGLR	b7/-0.004,y15-45^2/-0.002	HSASLIFLHGSGDSGQGLR	3	10239_HSASLIFLHGSGDSGQGLR_3	1/Q5VWZ2	1	b	7	light
1/Q5VWZ2	646.998	617.337	37.1	99319_y6_1_HSASLIFLHGSGDSGQGLR_3	-1	1911.7	10239_HSASLIFLHGSGDSGQGLR_3	0	HSASLIFLHGSGDSGQGLR	y6/0.002	HSASLIFLHGSGDSGQGLR	3	10239_HSASLIFLHGSGDSGQGLR_3	1/Q5VWZ2	1	y	6	light
1/Q5VWZ2	646.998	933.438	37.1	99330_y10_1_HSASLIFLHGSGDSGQGLR_3	-1	3662	10239_HSASLIFLHGSGDSGQGLR_3	0	HSASLIFLHGSGDSGQGLR	y10/0.014	HSASLIFLHGSGDSGQGLR	3	10239_HSASLIFLHGSGDSGQGLR_3	1/Q5VWZ2	1	y	10	light
1/Q5VWZ2	646.998	609.335	37.1	99318_b6_1_HSASLIFLHGSGDSGQGLR_3	-1	1124.3	10239_HSASLIFLHGSGDSGQGLR_3	0	HSASLIFLHGSGDSGQGLR	b6/0.001	HSASLIFLHGSGDSGQGLR	3	10239_HSASLIFLHGSGDSGQGLR_3	1/Q5VWZ2	1	b	6	light
1/Q5VWZ2	646.998	535.752	37.1	99316_y11_2_HSASLIFLHGSGDSGQGLR_3	-1	964.6	10239_HSASLIFLHGSGDSGQGLR_3	0	HSASLIFLHGSGDSGQGLR	y11^2/0.004	HSASLIFLHGSGDSGQGLR	3	10239_HSASLIFLHGSGDSGQGLR_3	1/Q5VWZ2	2	y	11	light
1/Q5VWZ2	646.998	1070.5	37.1	99331_y11_1_HSASLIFLHGSGDSGQGLR_3	-1	1182.2	10239_HSASLIFLHGSGDSGQGLR_3	0	HSASLIFLHGSGDSGQGLR	y11/0.011	HSASLIFLHGSGDSGQGLR	3	10239_HSASLIFLHGSGDSGQGLR_3	1/Q5VWZ2	1	y	11	light
1/Q86TI2	927.799	898.463	82.4	1428297_y8_1_ILYEEVDESEVEVIHVPSPALEER_3	-1	10000	102396_ILYEEVDESEVEVIHVPSPALEER_3	0	ILYEEVDESEVEVIHVPSPALEER	[y8/0.014]	ILYEEVDESEVEVIHVPSPALEER	3	102396_ILYEEVDESEVEVIHVPSPALEER_3	1/Q86TI2	1	y	8	light
1/Q86TI2	927.799	1346.74	82.4	1428303_y12_1_ILYEEVDESEVEVIHVPSPALEER_3	-1	1139.6	102396_ILYEEVDESEVEVIHVPSPALEER_3	0	ILYEEVDESEVEVIHVPSPALEER	y12/0.017	ILYEEVDESEVEVIHVPSPALEER	3	102396_ILYEEVDESEVEVIHVPSPALEER_3	1/Q86TI2	1	y	12	light
1/Q86TI2	927.799	390.239	82.4	1428290_b3_1_ILYEEVDESEVEVIHVPSPALEER_3	-1	1110.9	102396_ILYEEVDESEVEVIHVPSPALEER_3	0	ILYEEVDESEVEVIHVPSPALEER	b3/0.004	ILYEEVDESEVEVIHVPSPALEER	3	102396_ILYEEVDESEVEVIHVPSPALEER_3	1/Q86TI2	1	b	3	light
1/Q86TI2	927.799	1018	82.4	1428299_y18_2_ILYEEVDESEVEVIHVPSPALEER_3	-1	1625	102396_ILYEEVDESEVEVIHVPSPALEER_3	0	ILYEEVDESEVEVIHVPSPALEER	y18^2/0.018	ILYEEVDESEVEVIHVPSPALEER	3	102396_ILYEEVDESEVEVIHVPSPALEER_3	1/Q86TI2	2	y	18	light
1/Q86TI2	927.799	1247.67	82.4	1428302_y11_1_ILYEEVDESEVEVIHVPSPALEER_3	-1	1982.3	102396_ILYEEVDESEVEVIHVPSPALEER_3	0	ILYEEVDESEVEVIHVPSPALEER	[y11/0.019]	ILYEEVDESEVEVIHVPSPALEER	3	102396_ILYEEVDESEVEVIHVPSPALEER_3	1/Q86TI2	1	y	11	light
1/Q86TI2	927.799	1134.59	82.4	1428300_y10_1_ILYEEVDESEVEVIHVPSPALEER_3	-1	2523.5	102396_ILYEEVDESEVEVIHVPSPALEER_3	0	ILYEEVDESEVEVIHVPSPALEER	y10/-0.007	ILYEEVDESEVEVIHVPSPALEER	3	102396_ILYEEVDESEVEVIHVPSPALEER_3	1/Q86TI2	1	y	10	light
1/Q5VWZ2	485.5	705.344	36.8	99348_b14_2_HSASLIFLHGSGDSGQGLR_4	-1	1798.6	10240_HSASLIFLHGSGDSGQGLR_4	0	HSASLIFLHGSGDSGQGLR	b14^2/-0.000	HSASLIFLHGSGDSGQGLR	4	10240_HSASLIFLHGSGDSGQGLR_4	1/Q5VWZ2	2	b	14	light
1/Q5VWZ2	485.5	609.335	36.8	99343_b6_1_HSASLIFLHGSGDSGQGLR_4	-1	1660.8	10240_HSASLIFLHGSGDSGQGLR_4	0	HSASLIFLHGSGDSGQGLR	b6/0.001	HSASLIFLHGSGDSGQGLR	4	10240_HSASLIFLHGSGDSGQGLR_4	1/Q5VWZ2	1	b	6	light
1/Q5VWZ2	485.5	530.305	36.8	99339_y5_1_HSASLIFLHGSGDSGQGLR_4	-1	1598.7	10240_HSASLIFLHGSGDSGQGLR_4	0	HSASLIFLHGSGDSGQGLR	y5/0.000	HSASLIFLHGSGDSGQGLR	4	10240_HSASLIFLHGSGDSGQGLR_4	1/Q5VWZ2	1	y	5	light
1/Q5VWZ2	485.5	661.828	36.8	99346_b13_2_HSASLIFLHGSGDSGQGLR_4	-1	3114.4	10240_HSASLIFLHGSGDSGQGLR_4	0	HSASLIFLHGSGDSGQGLR	b13^2/-0.001	HSASLIFLHGSGDSGQGLR	4	10240_HSASLIFLHGSGDSGQGLR_4	1/Q5VWZ2	2	b	13	light
1/Q5VWZ2	485.5	496.251	36.8	99337_b5_1_HSASLIFLHGSGDSGQGLR_4	-1	2296.9	10240_HSASLIFLHGSGDSGQGLR_4	0	HSASLIFLHGSGDSGQGLR	b5/0.000	HSASLIFLHGSGDSGQGLR	4	10240_HSASLIFLHGSGDSGQGLR_4	1/Q5VWZ2	1	b	5	light
1/Q5VWZ2	485.5	473.283	36.8	99335_y4_1_HSASLIFLHGSGDSGQGLR_4	-1	3553.6	10240_HSASLIFLHGSGDSGQGLR_4	0	HSASLIFLHGSGDSGQGLR	y4/-0.001	HSASLIFLHGSGDSGQGLR	4	10240_HSASLIFLHGSGDSGQGLR_4	1/Q5VWZ2	1	y	4	light
1/P54577	427.268	504.318	27.5	98829_y4_1_HVLFPLK_2	-1	1535.1	10249_HVLFPLK_2	0	HVLFPLK	y4/0.009	HVLFPLK	2	10249_HVLFPLK_2	1/P54577	1	y	4	light
1/P54577	427.268	497.287	27.5	98828_b4_1_HVLFPLK_2	-1	6819	10249_HVLFPLK_2	0	HVLFPLK	b4/-0.002	HVLFPLK	2	10249_HVLFPLK_2	1/P54577	1	b	4	light
1/P54577	427.268	357.25	27.5	98827_y3_1_HVLFPLK_2	-1	5657.9	10249_HVLFPLK_2	0	HVLFPLK	y3/0.001	HVLFPLK	2	10249_HVLFPLK_2	1/P54577	1	y	3	light
1/P54577	427.268	716.471	27.5	98833_y6_1_HVLFPLK_2	-1	2302.6	10249_HVLFPLK_2	0	HVLFPLK	y6/0.007	HVLFPLK	2	10249_HVLFPLK_2	1/P54577	1	y	6	light
1/P54577	427.268	617.402	27.5	98831_y5_1_HVLFPLK_2	-1	3179.8	10249_HVLFPLK_2	0	HVLFPLK	y5/0.006	HVLFPLK	2	10249_HVLFPLK_2	1/P54577	1	y	5	light
1/P54577	427.268	350.219	27.5	98826_b3_1_HVLFPLK_2	-1	3355.3	10249_HVLFPLK_2	0	HVLFPLK	b3/0.008,y6-17^2/0.001	HVLFPLK	2	10249_HVLFPLK_2	1/P54577	1	b	3	light
1/P23141	590.985	649.334	50	6650_y6_1_GDVKPLAEQIAITAGC(UniMod:4)K_3	-1	6757.5	1025_GDVKPLAEQIAITAGC(UniMod:4)K_3	0	GDVKPLAEQIAITAGCK	y6/0.012	GDVKPLAEQIAITAGC(UniMod:4)K	3	1025_GDVKPLAEQIAITAGC(UniMod:4)K_3	1/P23141	1	y	6	light
1/P23141	590.985	681.393	50	6651_b7_1_GDVKPLAEQIAITAGC(UniMod:4)K_3	-1	3079.6	1025_GDVKPLAEQIAITAGC(UniMod:4)K_3	0	GDVKPLAEQIAITAGCK	b7/0.013,b14-46^2/0.013	GDVKPLAEQIAITAGC(UniMod:4)K	3	1025_GDVKPLAEQIAITAGC(UniMod:4)K_3	1/P23141	1	b	7	light
1/P23141	590.985	536.25	50	6648_y5_1_GDVKPLAEQIAITAGC(UniMod:4)K_3	-1	7711	1025_GDVKPLAEQIAITAGC(UniMod:4)K_3	0	GDVKPLAEQIAITAGCK	y5/0.010	GDVKPLAEQIAITAGC(UniMod:4)K	3	1025_GDVKPLAEQIAITAGC(UniMod:4)K_3	1/P23141	1	y	5	light
1/P23141	590.985	364.165	50	6645_y3_1_GDVKPLAEQIAITAGC(UniMod:4)K_3	-1	4426.8	1025_GDVKPLAEQIAITAGC(UniMod:4)K_3	0	GDVKPLAEQIAITAGCK	y3/0.002	GDVKPLAEQIAITAGC(UniMod:4)K	3	1025_GDVKPLAEQIAITAGC(UniMod:4)K_3	1/P23141	1	y	3	light
1/P23141	590.985	720.371	50	6652_y7_1_GDVKPLAEQIAITAGC(UniMod:4)K_3	-1	10000	1025_GDVKPLAEQIAITAGC(UniMod:4)K_3	0	GDVKPLAEQIAITAGCK	y7/0.017	GDVKPLAEQIAITAGC(UniMod:4)K	3	1025_GDVKPLAEQIAITAGC(UniMod:4)K_3	1/P23141	1	y	7	light
1/P23141	590.985	435.202	50	6647_y4_1_GDVKPLAEQIAITAGC(UniMod:4)K_3	-1	3776	1025_GDVKPLAEQIAITAGC(UniMod:4)K_3	0	GDVKPLAEQIAITAGCK	y4/0.004	GDVKPLAEQIAITAGC(UniMod:4)K	3	1025_GDVKPLAEQIAITAGC(UniMod:4)K_3	1/P23141	1	y	4	light
1/P04070	559.683	588.76	76.2	1570399_LAC(UniMod:4)GAVLIHPSWVLTAAHC(UniMod:4)MDESKK_5	-1	3678.2	102508_LAC(UniMod:4)GAVLIHPSWVLTAAHC(UniMod:4)MDESKK_5	0	LACGAVLIHPSWVLTAAHCMDESKK	y10^2/-0.001	LAC(UniMod:4)GAVLIHPSWVLTAAHC(UniMod:4)MDESKK	5	102508_LAC(UniMod:4)GAVLIHPSWVLTAAHC(UniMod:4)MDESKK_5	1/P04070	2	y	-1	light
1/P04070	559.683	639.284	76.2	1570400_LAC(UniMod:4)GAVLIHPSWVLTAAHC(UniMod:4)MDESKK_5	-1	8843.5	102508_LAC(UniMod:4)GAVLIHPSWVLTAAHC(UniMod:4)MDESKK_5	0	LACGAVLIHPSWVLTAAHCMDESKK	y11^2/-0.010	LAC(UniMod:4)GAVLIHPSWVLTAAHC(UniMod:4)MDESKK	5	102508_LAC(UniMod:4)GAVLIHPSWVLTAAHC(UniMod:4)MDESKK_5	1/P04070	2	y	-1	light
1/P04070	559.683	695.826	76.2	1570404_LAC(UniMod:4)GAVLIHPSWVLTAAHC(UniMod:4)MDESKK_5	-1	4971.6	102508_LAC(UniMod:4)GAVLIHPSWVLTAAHC(UniMod:4)MDESKK_5	0	LACGAVLIHPSWVLTAAHCMDESKK	y12^2/0.002	LAC(UniMod:4)GAVLIHPSWVLTAAHC(UniMod:4)MDESKK	5	102508_LAC(UniMod:4)GAVLIHPSWVLTAAHC(UniMod:4)MDESKK_5	1/P04070	2	y	-1	light
1/P04070	559.683	473.218	76.2	1570395_LAC(UniMod:4)GAVLIHPSWVLTAAHC(UniMod:4)MDESKK_5	-1	2073.7	102508_LAC(UniMod:4)GAVLIHPSWVLTAAHC(UniMod:4)MDESKK_5	0	LACGAVLIHPSWVLTAAHCMDESKK	b5/0.003	LAC(UniMod:4)GAVLIHPSWVLTAAHC(UniMod:4)MDESKK	5	102508_LAC(UniMod:4)GAVLIHPSWVLTAAHC(UniMod:4)MDESKK_5	1/P04070	1	b	-1	light
1/P04070	559.683	653.342	76.2	1570402_LAC(UniMod:4)GAVLIHPSWVLTAAHC(UniMod:4)MDESKK_5	-1	3015.8	102508_LAC(UniMod:4)GAVLIHPSWVLTAAHC(UniMod:4)MDESKK_5	0	LACGAVLIHPSWVLTAAHCMDESKK	b12^2/0.001	LAC(UniMod:4)GAVLIHPSWVLTAAHC(UniMod:4)MDESKK	5	102508_LAC(UniMod:4)GAVLIHPSWVLTAAHC(UniMod:4)MDESKK_5	1/P04070	2	b	-1	light
1/P04070	559.683	737.35	76.2	1570406_LAC(UniMod:4)GAVLIHPSWVLTAAHC(UniMod:4)MDESKK_5	-1	1937.6	102508_LAC(UniMod:4)GAVLIHPSWVLTAAHC(UniMod:4)MDESKK_5	0	LACGAVLIHPSWVLTAAHCMDESKK	y6/-0.003	LAC(UniMod:4)GAVLIHPSWVLTAAHC(UniMod:4)MDESKK	5	102508_LAC(UniMod:4)GAVLIHPSWVLTAAHC(UniMod:4)MDESKK_5	1/P04070	1	y	-1	light
1/Q8NFV4	887.954	476.265	90.7	1570991_LADEQLSSVIQDMAVR_2	-1	5455.4	102546_LADEQLSSVIQDMAVR_2	0	LADEQLSSVIQDMAVR	y4/-0.002	LADEQLSSVIQDMAVR	2	102546_LADEQLSSVIQDMAVR_2	1/Q8NFV4	1	y	-1	light
1/Q8NFV4	887.954	1105.57	90.7	1571002_LADEQLSSVIQDMAVR_2	-1	10000	102546_LADEQLSSVIQDMAVR_2	0	LADEQLSSVIQDMAVR	y10/0.007	LADEQLSSVIQDMAVR	2	102546_LADEQLSSVIQDMAVR_2	1/Q8NFV4	1	y	-1	light
1/Q8NFV4	887.954	832.435	90.7	1570998_LADEQLSSVIQDMAVR_2	-1	6495.2	102546_LADEQLSSVIQDMAVR_2	0	LADEQLSSVIQDMAVR	y7/0.006	LADEQLSSVIQDMAVR	2	102546_LADEQLSSVIQDMAVR_2	1/Q8NFV4	1	y	-1	light
1/Q8NFV4	887.954	1018.53	90.7	1571000_LADEQLSSVIQDMAVR_2	-1	6345.3	102546_LADEQLSSVIQDMAVR_2	0	LADEQLSSVIQDMAVR	y9/0.004	LADEQLSSVIQDMAVR	2	102546_LADEQLSSVIQDMAVR_2	1/Q8NFV4	1	y	-1	light
1/Q8NFV4	887.954	1218.65	90.7	1571003_LADEQLSSVIQDMAVR_2	-1	5066.7	102546_LADEQLSSVIQDMAVR_2	0	LADEQLSSVIQDMAVR	y11/-0.007	LADEQLSSVIQDMAVR	2	102546_LADEQLSSVIQDMAVR_2	1/Q8NFV4	1	y	-1	light
1/Q8NFV4	887.954	719.35	90.7	1570995_LADEQLSSVIQDMAVR_2	-1	4994.7	102546_LADEQLSSVIQDMAVR_2	0	LADEQLSSVIQDMAVR	y6/-0.003	LADEQLSSVIQDMAVR	2	102546_LADEQLSSVIQDMAVR_2	1/Q8NFV4	1	y	-1	light
1/Q8NFV4	895.951	1121.56	55.5	1571012_LADEQLSSVIQDM(UniMod:35)AVR_2	-1	8133.7	102547_LADEQLSSVIQDM(UniMod:35)AVR_2	0	LADEQLSSVIQDMAVR	y10/-0.018	LADEQLSSVIQDM(UniMod:35)AVR	2	102547_LADEQLSSVIQDM(UniMod:35)AVR_2	1/Q8NFV4	1	y	-1	light
1/Q8NFV4	895.951	848.429	55.5	1571009_LADEQLSSVIQDM(UniMod:35)AVR_2	-1	3036.2	102547_LADEQLSSVIQDM(UniMod:35)AVR_2	0	LADEQLSSVIQDMAVR	y7/-0.001	LADEQLSSVIQDM(UniMod:35)AVR	2	102547_LADEQLSSVIQDM(UniMod:35)AVR_2	1/Q8NFV4	1	y	-1	light
1/Q8NFV4	895.951	947.498	55.5	1571010_LADEQLSSVIQDM(UniMod:35)AVR_2	-1	2745.8	102547_LADEQLSSVIQDM(UniMod:35)AVR_2	0	LADEQLSSVIQDMAVR	y8/-0.019	LADEQLSSVIQDM(UniMod:35)AVR	2	102547_LADEQLSSVIQDM(UniMod:35)AVR_2	1/Q8NFV4	1	y	-1	light
1/Q8NFV4	895.951	1234.65	55.5	1571013_LADEQLSSVIQDM(UniMod:35)AVR_2	-1	4516.7	102547_LADEQLSSVIQDM(UniMod:35)AVR_2	0	LADEQLSSVIQDMAVR	y11/-0.017	LADEQLSSVIQDM(UniMod:35)AVR	2	102547_LADEQLSSVIQDM(UniMod:35)AVR_2	1/Q8NFV4	1	y	-1	light
1/Q8NFV4	895.951	557.257	55.5	1571007_LADEQLSSVIQDM(UniMod:35)AVR_2	-1	3036.2	102547_LADEQLSSVIQDM(UniMod:35)AVR_2	0	LADEQLSSVIQDMAVR	b5/-0.002,m2:6/-0.002	LADEQLSSVIQDM(UniMod:35)AVR	2	102547_LADEQLSSVIQDM(UniMod:35)AVR_2	1/Q8NFV4	1	b	-1	light
1/Q8NFV4	895.951	429.198	55.5	1571005_LADEQLSSVIQDM(UniMod:35)AVR_2	-1	2841.2	102547_LADEQLSSVIQDM(UniMod:35)AVR_2	0	LADEQLSSVIQDMAVR	b4/0.009	LADEQLSSVIQDM(UniMod:35)AVR	2	102547_LADEQLSSVIQDM(UniMod:35)AVR_2	1/Q8NFV4	1	b	-1	light
1/Q8NFV4	592.305	832.435	91.7	1571026_LADEQLSSVIQDMAVR_3	-1	7038.6	102548_LADEQLSSVIQDMAVR_3	0	LADEQLSSVIQDMAVR	y7/-0.012	LADEQLSSVIQDMAVR	3	102548_LADEQLSSVIQDMAVR_3	1/Q8NFV4	1	y	-1	light
1/Q8NFV4	592.305	476.265	91.7	1571017_LADEQLSSVIQDMAVR_3	-1	6120.8	102548_LADEQLSSVIQDMAVR_3	0	LADEQLSSVIQDMAVR	y4/0.002	LADEQLSSVIQDMAVR	3	102548_LADEQLSSVIQDMAVR_3	1/Q8NFV4	1	y	-1	light
1/Q8NFV4	592.305	943.473	91.7	1571029_LADEQLSSVIQDMAVR_3	-1	2374.1	102548_LADEQLSSVIQDMAVR_3	0	LADEQLSSVIQDMAVR	b9/0.000,m2:10/0.000	LADEQLSSVIQDMAVR	3	102548_LADEQLSSVIQDMAVR_3	1/Q8NFV4	1	b	-1	light
1/Q8NFV4	592.305	557.257	91.7	1571019_LADEQLSSVIQDMAVR_3	-1	2270.2	102548_LADEQLSSVIQDMAVR_3	0	LADEQLSSVIQDMAVR	b5/-0.006	LADEQLSSVIQDMAVR	3	102548_LADEQLSSVIQDMAVR_3	1/Q8NFV4	1	b	-1	light
1/Q8NFV4	592.305	844.405	91.7	1571027_LADEQLSSVIQDMAVR_3	-1	1880.9	102548_LADEQLSSVIQDMAVR_3	0	LADEQLSSVIQDMAVR	b8/0.004,m8:15/-0.015	LADEQLSSVIQDMAVR	3	102548_LADEQLSSVIQDMAVR_3	1/Q8NFV4	1	b	-1	light
1/Q8NFV4	592.305	719.35	91.7	1571024_LADEQLSSVIQDMAVR_3	-1	10000	102548_LADEQLSSVIQDMAVR_3	0	LADEQLSSVIQDMAVR	y6/0.001	LADEQLSSVIQDMAVR	3	102548_LADEQLSSVIQDMAVR_3	1/Q8NFV4	1	y	-1	light
1/P02788	668.352	1151.58	86.8	1571054_LADFALLC(UniMod:4)LDGK_2	-1	6210.2	102549_LADFALLC(UniMod:4)LDGK_2	0	LADFALLCLDGK	y10/-0.000	LADFALLC(UniMod:4)LDGK	2	102549_LADFALLC(UniMod:4)LDGK_2	1/P02788	1	y	-1	light
1/P02788	668.352	518.261	86.8	1571035_LADFALLC(UniMod:4)LDGK_2	-1	3609.1	102549_LADFALLC(UniMod:4)LDGK_2	0	LADFALLCLDGK	b5/-0.001,m2:6/-0.001	LADFALLC(UniMod:4)LDGK	2	102549_LADFALLC(UniMod:4)LDGK_2	1/P02788	1	b	-1	light
1/P02788	668.352	592.276	86.8	1571036_LADFALLC(UniMod:4)LDGK_2	-1	8709.6	102549_LADFALLC(UniMod:4)LDGK_2	0	LADFALLCLDGK	y5/-0.001	LADFALLC(UniMod:4)LDGK	2	102549_LADFALLC(UniMod:4)LDGK_2	1/P02788	1	y	-1	light
1/P02788	668.352	889.481	86.8	1571047_LADFALLC(UniMod:4)LDGK_2	-1	7003.7	102549_LADFALLC(UniMod:4)LDGK_2	0	LADFALLCLDGK	y8/0.002	LADFALLC(UniMod:4)LDGK	2	102549_LADFALLC(UniMod:4)LDGK_2	1/P02788	1	y	-1	light
1/P02788	668.352	705.36	86.8	1571040_LADFALLC(UniMod:4)LDGK_2	-1	8591.5	102549_LADFALLC(UniMod:4)LDGK_2	0	LADFALLCLDGK	y6/-0.001	LADFALLC(UniMod:4)LDGK	2	102549_LADFALLC(UniMod:4)LDGK_2	1/P02788	1	y	-1	light
1/P02788	668.352	818.444	86.8	1571044_LADFALLC(UniMod:4)LDGK_2	-1	8180	102549_LADFALLC(UniMod:4)LDGK_2	0	LADFALLCLDGK	y7/-0.003	LADFALLC(UniMod:4)LDGK	2	102549_LADFALLC(UniMod:4)LDGK_2	1/P02788	1	y	-1	light
1/P36776	700.84	476.271	38.4	98882_y4_1_HVMDVVDEELSK_2	-1	2192.8	10255_HVMDVVDEELSK_2	0	HVMDVVDEELSK	y4/-0.015	HVMDVVDEELSK	2	10255_HVMDVVDEELSK_2	1/P36776	1	y	4	light
1/P36776	700.84	1263.61	38.4	98891_y11_1_HVMDVVDEELSK_2	-1	2024.1	10255_HVMDVVDEELSK_2	0	HVMDVVDEELSK	y11/-0.010	HVMDVVDEELSK	2	10255_HVMDVVDEELSK_2	1/P36776	1	y	11	light
1/P36776	700.84	582.27	38.4	98885_b5_1_HVMDVVDEELSK_2	-1	1855.4	10255_HVMDVVDEELSK_2	0	HVMDVVDEELSK	b5/-0.006	HVMDVVDEELSK	2	10255_HVMDVVDEELSK_2	1/P36776	1	b	5	light
1/P36776	700.84	1164.55	38.4	98890_y10_1_HVMDVVDEELSK_2	-1	7614.5	10255_HVMDVVDEELSK_2	0	HVMDVVDEELSK	y10/-0.011	HVMDVVDEELSK	2	10255_HVMDVVDEELSK_2	1/P36776	1	y	10	light
1/P36776	700.84	1033.5	38.4	98889_y9_1_HVMDVVDEELSK_2	-1	1855.4	10255_HVMDVVDEELSK_2	0	HVMDVVDEELSK	y9/-0.011	HVMDVVDEELSK	2	10255_HVMDVVDEELSK_2	1/P36776	1	y	9	light
1/P36776	700.84	483.202	38.4	98884_b4_1_HVMDVVDEELSK_2	-1	1855.4	10255_HVMDVVDEELSK_2	0	HVMDVVDEELSK	[b4/0.017]	HVMDVVDEELSK	2	10255_HVMDVVDEELSK_2	1/P36776	1	b	4	light
1/P02788	497.938	861.461	71.6	1571072_LADFALLC(UniMod:4)LDGKR_3	-1	3608.5	102550_LADFALLC(UniMod:4)LDGKR_3	0	LADFALLCLDGKR	y7/-0.003	LADFALLC(UniMod:4)LDGKR	3	102550_LADFALLC(UniMod:4)LDGKR_3	1/P02788	1	y	-1	light
1/P02788	497.938	974.545	71.6	1571073_LADFALLC(UniMod:4)LDGKR_3	-1	1538.6	102550_LADFALLC(UniMod:4)LDGKR_3	0	LADFALLCLDGKR	y8/-0.002	LADFALLC(UniMod:4)LDGKR	3	102550_LADFALLC(UniMod:4)LDGKR_3	1/P02788	1	y	-1	light
1/P02788	497.938	654.342	71.6	1571067_LADFALLC(UniMod:4)LDGKR_3	-1	7695.6	102550_LADFALLC(UniMod:4)LDGKR_3	0	LADFALLCLDGKR	y11^2/0.000	LADFALLC(UniMod:4)LDGKR	3	102550_LADFALLC(UniMod:4)LDGKR_3	1/P02788	2	y	-1	light
1/P02788	497.938	360.235	71.6	1571056_LADFALLC(UniMod:4)LDGKR_3	-1	3908.3	102550_LADFALLC(UniMod:4)LDGKR_3	0	LADFALLCLDGKR	y3/0.001	LADFALLC(UniMod:4)LDGKR	3	102550_LADFALLC(UniMod:4)LDGKR_3	1/P02788	1	y	-1	light
1/P02788	497.938	748.377	71.6	1571069_LADFALLC(UniMod:4)LDGKR_3	-1	3651.8	102550_LADFALLC(UniMod:4)LDGKR_3	0	LADFALLCLDGKR	y6/-0.003	LADFALLC(UniMod:4)LDGKR	3	102550_LADFALLC(UniMod:4)LDGKR_3	1/P02788	1	y	-1	light
1/P02788	497.938	689.861	71.6	1571068_LADFALLC(UniMod:4)LDGKR_3	-1	3899.8	102550_LADFALLC(UniMod:4)LDGKR_3	0	LADFALLCLDGKR	y12^2/-0.000	LADFALLC(UniMod:4)LDGKR	3	102550_LADFALLC(UniMod:4)LDGKR_3	1/P02788	2	y	-1	light
1/P00747	649.828	1074.56	5.9	99546_y9_1_HSIFTPETNPR_2	-1	5520	10256_HSIFTPETNPR_2	0	HSIFTPETNPR	y9/-0.003	HSIFTPETNPR	2	10256_HSIFTPETNPR_2	1/P00747	1	y	9	light
1/P00747	649.828	1161.59	5.9	99547_y10_1_HSIFTPETNPR_2	-1	5119	10256_HSIFTPETNPR_2	0	HSIFTPETNPR	y10/0.005	HSIFTPETNPR	2	10256_HSIFTPETNPR_2	1/P00747	1	y	10	light
1/P00747	649.828	487.262	5.9	99542_y4_1_HSIFTPETNPR_2	-1	1765.9	10256_HSIFTPETNPR_2	0	HSIFTPETNPR	y4/-0.008	HSIFTPETNPR	2	10256_HSIFTPETNPR_2	1/P00747	1	y	4	light
1/P00747	649.828	713.358	5.9	99543_y6_1_HSIFTPETNPR_2	-1	5522.2	10256_HSIFTPETNPR_2	0	HSIFTPETNPR	y6/0.002	HSIFTPETNPR	2	10256_HSIFTPETNPR_2	1/P00747	1	y	6	light
1/P00747	649.828	961.474	5.9	99545_y8_1_HSIFTPETNPR_2	-1	5508.7	10256_HSIFTPETNPR_2	0	HSIFTPETNPR	y8/0.001	HSIFTPETNPR	2	10256_HSIFTPETNPR_2	1/P00747	1	y	8	light
1/P00747	649.828	814.405	5.9	99544_y7_1_HSIFTPETNPR_2	-1	2860.7	10256_HSIFTPETNPR_2	0	HSIFTPETNPR	y7/-0.006	HSIFTPETNPR	2	10256_HSIFTPETNPR_2	1/P00747	1	y	7	light
1/P00747	433.554	586.298	4.8	99552_b5_1_HSIFTPETNPR_3	-1	9432.6	10257_HSIFTPETNPR_3	0	HSIFTPETNPR	b5/0.003	HSIFTPETNPR	3	10257_HSIFTPETNPR_3	1/P00747	1	b	5	light
1/P00747	433.554	485.251	4.8	99550_b4_1_HSIFTPETNPR_3	-1	6778.2	10257_HSIFTPETNPR_3	0	HSIFTPETNPR	b4/0.001	HSIFTPETNPR	3	10257_HSIFTPETNPR_3	1/P00747	1	b	4	light
1/P00747	433.554	386.215	4.8	99549_y3_1_HSIFTPETNPR_3	-1	2007.6	10257_HSIFTPETNPR_3	0	HSIFTPETNPR	y3/0.003	HSIFTPETNPR	3	10257_HSIFTPETNPR_3	1/P00747	1	y	3	light
1/P00747	433.554	616.305	4.8	99553_y5_1_HSIFTPETNPR_3	-1	5933.7	10257_HSIFTPETNPR_3	0	HSIFTPETNPR	y5/-0.002	HSIFTPETNPR	3	10257_HSIFTPETNPR_3	1/P00747	1	y	5	light
1/P00747	433.554	487.262	4.8	99551_y4_1_HSIFTPETNPR_3	-1	10000	10257_HSIFTPETNPR_3	0	HSIFTPETNPR	y4/0.002	HSIFTPETNPR	3	10257_HSIFTPETNPR_3	1/P00747	1	y	4	light
1/P00747	433.554	713.358	4.8	99554_y6_1_HSIFTPETNPR_3	-1	9923.6	10257_HSIFTPETNPR_3	0	HSIFTPETNPR	y6/0.004	HSIFTPETNPR	3	10257_HSIFTPETNPR_3	1/P00747	1	y	6	light
1/P52948	525.764	361.183	8	1571577_LADINYEGR_2	-1	903.6	102585_LADINYEGR_2	0	LADINYEGR	y3/-0.001	LADINYEGR	2	102585_LADINYEGR_2	1/P52948	1	y	-1	light
1/P52948	525.764	638.289	8	1571580_LADINYEGR_2	-1	5025.4	102585_LADINYEGR_2	0	LADINYEGR	y5/-0.006	LADINYEGR	2	102585_LADINYEGR_2	1/P52948	1	y	-1	light
1/P52948	525.764	937.437	8	1571587_LADINYEGR_2	-1	2133.9	102585_LADINYEGR_2	0	LADINYEGR	y8/0.002	LADINYEGR	2	102585_LADINYEGR_2	1/P52948	1	y	-1	light
1/P52948	525.764	524.246	8	1571579_LADINYEGR_2	-1	1832.5	102585_LADINYEGR_2	0	LADINYEGR	y4/-0.003	LADINYEGR	2	102585_LADINYEGR_2	1/P52948	1	y	-1	light
1/P52948	525.764	866.4	8	1571584_LADINYEGR_2	-1	6485.8	102585_LADINYEGR_2	0	LADINYEGR	y7/-0.001	LADINYEGR	2	102585_LADINYEGR_2	1/P52948	1	y	-1	light
1/P52948	525.764	751.373	8	1571582_LADINYEGR_2	-1	2380.9	102585_LADINYEGR_2	0	LADINYEGR	y6/-0.003	LADINYEGR	2	102585_LADINYEGR_2	1/P52948	1	y	-1	light
1/Q9NUJ1	540.773	712.297	43.7	147372_y5_1_ALAIEEFC(UniMod:4)K_2	-1	5548.9	10260_ALAIEEFC(UniMod:4)K_2	0	ALAIEEFCK	y5/0.012	ALAIEEFC(UniMod:4)K	2	10260_ALAIEEFC(UniMod:4)K_2	1/Q9NUJ1	1	y	5	light
1/Q9NUJ1	540.773	896.418	43.7	147374_y7_1_ALAIEEFC(UniMod:4)K_2	-1	9374.2	10260_ALAIEEFC(UniMod:4)K_2	0	ALAIEEFCK	y7/0.018	ALAIEEFC(UniMod:4)K	2	10260_ALAIEEFC(UniMod:4)K_2	1/Q9NUJ1	1	y	7	light
1/Q9NUJ1	540.773	369.25	43.7	147368_b4_1_ALAIEEFC(UniMod:4)K_2	-1	864.2	10260_ALAIEEFC(UniMod:4)K_2	0	ALAIEEFCK	b4/0.002	ALAIEEFC(UniMod:4)K	2	10260_ALAIEEFC(UniMod:4)K_2	1/Q9NUJ1	1	b	4	light
1/Q9NUJ1	540.773	583.254	43.7	147371_y4_1_ALAIEEFC(UniMod:4)K_2	-1	1800	10260_ALAIEEFC(UniMod:4)K_2	0	ALAIEEFCK	y4/0.006	ALAIEEFC(UniMod:4)K	2	10260_ALAIEEFC(UniMod:4)K_2	1/Q9NUJ1	1	y	4	light
1/Q9NUJ1	540.773	825.381	43.7	147373_y6_1_ALAIEEFC(UniMod:4)K_2	-1	3903.7	10260_ALAIEEFC(UniMod:4)K_2	0	ALAIEEFCK	y6/0.015	ALAIEEFC(UniMod:4)K	2	10260_ALAIEEFC(UniMod:4)K_2	1/Q9NUJ1	1	y	6	light
1/Q9NUJ1	540.773	454.212	43.7	147369_y3_1_ALAIEEFC(UniMod:4)K_2	-1	1778	10260_ALAIEEFC(UniMod:4)K_2	0	ALAIEEFCK	y3/0.002	ALAIEEFC(UniMod:4)K	2	10260_ALAIEEFC(UniMod:4)K_2	1/Q9NUJ1	1	y	3	light
1/Q16740	583.809	461.746	-9.8	1431666_y9_2_IMIHQPSGGAR_2	-1	418.3	102630_IMIHQPSGGAR_2	0	IMIHQPSGGAR	y9^2/-0.004	IMIHQPSGGAR	2	102630_IMIHQPSGGAR_2	1/Q16740	2	y	9	light
1/Q16740	583.809	809.401	-9.8	1431671_y8_1_IMIHQPSGGAR_2	-1	779.1	102630_IMIHQPSGGAR_2	0	IMIHQPSGGAR	y8/0.000	IMIHQPSGGAR	2	102630_IMIHQPSGGAR_2	1/Q16740	1	y	8	light
1/Q16740	583.809	405.204	-9.8	1431664_y8_2_IMIHQPSGGAR_2	-1	654.1	102630_IMIHQPSGGAR_2	0	IMIHQPSGGAR	y8^2/0.002	IMIHQPSGGAR	2	102630_IMIHQPSGGAR_2	1/Q16740	2	y	8	light
1/Q16740	583.809	544.284	-9.8	1431668_y6_1_IMIHQPSGGAR_2	-1	3214	102630_IMIHQPSGGAR_2	0	IMIHQPSGGAR	y6/-0.002	IMIHQPSGGAR	2	102630_IMIHQPSGGAR_2	1/Q16740	1	y	6	light
1/Q16740	583.809	672.342	-9.8	1431670_y7_1_IMIHQPSGGAR_2	-1	901	102630_IMIHQPSGGAR_2	0	IMIHQPSGGAR	y7/-0.007	IMIHQPSGGAR	2	102630_IMIHQPSGGAR_2	1/Q16740	1	y	7	light
1/Q16740	583.809	623.333	-9.8	1431669_b5_1_IMIHQPSGGAR_2	-1	454	102630_IMIHQPSGGAR_2	0	IMIHQPSGGAR	b5/-0.010	IMIHQPSGGAR	2	102630_IMIHQPSGGAR_2	1/Q16740	1	b	5	light
1/Q92597	829.062	375.184	103.9	1572685_LAEAFKYFVQGMGYMPSASMTR_3	-1	2816.3	102660_LAEAFKYFVQGMGYMPSASMTR_3	0	LAEAFKYFVQGMGYMPSASMTR	y7^2/-0.001	LAEAFKYFVQGMGYMPSASMTR	3	102660_LAEAFKYFVQGMGYMPSASMTR_3	1/Q92597	2	y	-1	light
1/Q92597	829.062	1100.49	103.9	1572696_LAEAFKYFVQGMGYMPSASMTR_3	-1	3477.4	102660_LAEAFKYFVQGMGYMPSASMTR_3	0	LAEAFKYFVQGMGYMPSASMTR	y10/0.020	LAEAFKYFVQGMGYMPSASMTR	3	102660_LAEAFKYFVQGMGYMPSASMTR_3	1/Q92597	1	y	-1	light
1/Q92597	829.062	749.361	103.9	1572691_LAEAFKYFVQGMGYMPSASMTR_3	-1	6556.5	102660_LAEAFKYFVQGMGYMPSASMTR_3	0	LAEAFKYFVQGMGYMPSASMTR	[y7/0.015]	LAEAFKYFVQGMGYMPSASMTR	3	102660_LAEAFKYFVQGMGYMPSASMTR_3	1/Q92597	1	y	-1	light
1/Q92597	829.062	880.402	103.9	1572692_LAEAFKYFVQGMGYMPSASMTR_3	-1	3704	102660_LAEAFKYFVQGMGYMPSASMTR_3	0	LAEAFKYFVQGMGYMPSASMTR	y8/0.014	LAEAFKYFVQGMGYMPSASMTR	3	102660_LAEAFKYFVQGMGYMPSASMTR_3	1/Q92597	1	y	-1	light
1/Q92597	829.062	652.308	103.9	1572688_LAEAFKYFVQGMGYMPSASMTR_3	-1	1785	102660_LAEAFKYFVQGMGYMPSASMTR_3	0	LAEAFKYFVQGMGYMPSASMTR	y6/0.003	LAEAFKYFVQGMGYMPSASMTR	3	102660_LAEAFKYFVQGMGYMPSASMTR_3	1/Q92597	1	y	-1	light
1/Q92597	829.062	970.503	103.9	1572693_LAEAFKYFVQGMGYMPSASMTR_3	-1	2290.4	102660_LAEAFKYFVQGMGYMPSASMTR_3	0	LAEAFKYFVQGMGYMPSASMTR	b8/0.000	LAEAFKYFVQGMGYMPSASMTR	3	102660_LAEAFKYFVQGMGYMPSASMTR_3	1/Q92597	1	b	-1	light
1/P00488	728.881	1057.56	31.7	99041_y9_1_HVYGELDVQIQR_2	-1	2175.3	10268_HVYGELDVQIQR_2	0	HVYGELDVQIQR	y9/0.011	HVYGELDVQIQR	2	10268_HVYGELDVQIQR_2	1/P00488	1	y	9	light
1/P00488	728.881	643.389	31.7	99037_y5_1_HVYGELDVQIQR_2	-1	1685.2	10268_HVYGELDVQIQR_2	0	HVYGELDVQIQR	y5/0.002	HVYGELDVQIQR	2	10268_HVYGELDVQIQR_2	1/P00488	1	y	5	light
1/P00488	728.881	1319.7	31.7	99043_y11_1_HVYGELDVQIQR_2	-1	1908.3	10268_HVYGELDVQIQR_2	0	HVYGELDVQIQR	y11/0.000	HVYGELDVQIQR	2	10268_HVYGELDVQIQR_2	1/P00488	1	y	11	light
1/P00488	728.881	1220.63	31.7	99042_y10_1_HVYGELDVQIQR_2	-1	9239.7	10268_HVYGELDVQIQR_2	0	HVYGELDVQIQR	y10/-0.005	HVYGELDVQIQR	2	10268_HVYGELDVQIQR_2	1/P00488	1	y	10	light
1/P00488	728.881	758.416	31.7	99038_y6_1_HVYGELDVQIQR_2	-1	878.4	10268_HVYGELDVQIQR_2	0	HVYGELDVQIQR	y6/0.012	HVYGELDVQIQR	2	10268_HVYGELDVQIQR_2	1/P00488	1	y	6	light
1/P00488	728.881	871.5	31.7	99039_y7_1_HVYGELDVQIQR_2	-1	1008.5	10268_HVYGELDVQIQR_2	0	HVYGELDVQIQR	y7/-0.017	HVYGELDVQIQR	2	10268_HVYGELDVQIQR_2	1/P00488	1	y	7	light
1/P00488	486.256	758.416	31.1	99051_y6_1_HVYGELDVQIQR_3	-1	2725.9	10269_HVYGELDVQIQR_3	0	HVYGELDVQIQR	y6/0.000	HVYGELDVQIQR	3	10269_HVYGELDVQIQR_3	1/P00488	1	y	6	light
1/P00488	486.256	416.262	31.1	99045_y3_1_HVYGELDVQIQR_3	-1	6820.9	10269_HVYGELDVQIQR_3	0	HVYGELDVQIQR	y3/0.002	HVYGELDVQIQR	3	10269_HVYGELDVQIQR_3	1/P00488	1	y	3	light
1/P00488	486.256	586.262	31.1	99048_b5_1_HVYGELDVQIQR_3	-1	6298	10269_HVYGELDVQIQR_3	0	HVYGELDVQIQR	b5/0.002	HVYGELDVQIQR	3	10269_HVYGELDVQIQR_3	1/P00488	1	b	5	light
1/P00488	486.256	544.32	31.1	99047_y4_1_HVYGELDVQIQR_3	-1	10000	10269_HVYGELDVQIQR_3	0	HVYGELDVQIQR	y4/0.000	HVYGELDVQIQR	3	10269_HVYGELDVQIQR_3	1/P00488	1	y	4	light
1/P00488	486.256	643.389	31.1	99049_y5_1_HVYGELDVQIQR_3	-1	3156.2	10269_HVYGELDVQIQR_3	0	HVYGELDVQIQR	y5/0.003	HVYGELDVQIQR	3	10269_HVYGELDVQIQR_3	1/P00488	1	y	5	light
1/P00488	486.256	814.373	31.1	99052_b7_1_HVYGELDVQIQR_3	-1	7951.2	10269_HVYGELDVQIQR_3	0	HVYGELDVQIQR	b7/-0.001	HVYGELDVQIQR	3	10269_HVYGELDVQIQR_3	1/P00488	1	b	7	light
1/P02787	1080.01	1026.53	90.8	1432495_y10_1_IMNGEADAMSLDGGFVYIAGK_2	-1	3579.6	102690_IMNGEADAMSLDGGFVYIAGK_2	0	IMNGEADAMSLDGGFVYIAGK	y10/-0.014	IMNGEADAMSLDGGFVYIAGK	2	102690_IMNGEADAMSLDGGFVYIAGK_2	1/P02787	1	y	10	light
1/P02787	1080.01	911.499	90.8	1432494_y9_1_IMNGEADAMSLDGGFVYIAGK_2	-1	6325.6	102690_IMNGEADAMSLDGGFVYIAGK_2	0	IMNGEADAMSLDGGFVYIAGK	y9/0.008	IMNGEADAMSLDGGFVYIAGK	2	102690_IMNGEADAMSLDGGFVYIAGK_2	1/P02787	1	y	9	light
1/P02787	1080.01	388.255	90.8	1432490_y4_1_IMNGEADAMSLDGGFVYIAGK_2	-1	4462.6	102690_IMNGEADAMSLDGGFVYIAGK_2	0	IMNGEADAMSLDGGFVYIAGK	y4/-0.003	IMNGEADAMSLDGGFVYIAGK	2	102690_IMNGEADAMSLDGGFVYIAGK_2	1/P02787	1	y	4	light
1/P02787	1080.01	1226.64	90.8	1432497_y12_1_IMNGEADAMSLDGGFVYIAGK_2	-1	6713.2	102690_IMNGEADAMSLDGGFVYIAGK_2	0	IMNGEADAMSLDGGFVYIAGK	y12/-0.008	IMNGEADAMSLDGGFVYIAGK	2	102690_IMNGEADAMSLDGGFVYIAGK_2	1/P02787	1	y	12	light
1/P02787	1080.01	551.319	90.8	1432491_y5_1_IMNGEADAMSLDGGFVYIAGK_2	-1	7865.3	102690_IMNGEADAMSLDGGFVYIAGK_2	0	IMNGEADAMSLDGGFVYIAGK	y5/-0.001	IMNGEADAMSLDGGFVYIAGK	2	102690_IMNGEADAMSLDGGFVYIAGK_2	1/P02787	1	y	5	light
1/P02787	1080.01	1357.68	90.8	1432498_y13_1_IMNGEADAMSLDGGFVYIAGK_2	-1	5925.7	102690_IMNGEADAMSLDGGFVYIAGK_2	0	IMNGEADAMSLDGGFVYIAGK	y13/0.002	IMNGEADAMSLDGGFVYIAGK	2	102690_IMNGEADAMSLDGGFVYIAGK_2	1/P02787	1	y	13	light
1/P02787	1088.01	388.255	79.2	1432501_y4_1_IM(UniMod:35)NGEADAMSLDGGFVYIAGK_2	-1	5074.7	102691_IM(UniMod:35)NGEADAMSLDGGFVYIAGK_2	0	IMNGEADAMSLDGGFVYIAGK	y4/-0.000	IM(UniMod:35)NGEADAMSLDGGFVYIAGK	2	102691_IM(UniMod:35)NGEADAMSLDGGFVYIAGK_2	1/P02787	1	y	4	light
1/P02787	1088.01	1614.78	79.2	1432506_y16_1_IM(UniMod:35)NGEADAMSLDGGFVYIAGK_2	-1	2038.3	102691_IM(UniMod:35)NGEADAMSLDGGFVYIAGK_2	0	IMNGEADAMSLDGGFVYIAGK	y16/-0.017	IM(UniMod:35)NGEADAMSLDGGFVYIAGK	2	102691_IM(UniMod:35)NGEADAMSLDGGFVYIAGK_2	1/P02787	1	y	16	light
1/P02787	1088.01	650.387	79.2	1432503_y6_1_IM(UniMod:35)NGEADAMSLDGGFVYIAGK_2	-1	2953.2	102691_IM(UniMod:35)NGEADAMSLDGGFVYIAGK_2	0	IMNGEADAMSLDGGFVYIAGK	y6/0.005	IM(UniMod:35)NGEADAMSLDGGFVYIAGK	2	102691_IM(UniMod:35)NGEADAMSLDGGFVYIAGK_2	1/P02787	1	y	6	light
1/P02787	1088.01	551.319	79.2	1432502_y5_1_IM(UniMod:35)NGEADAMSLDGGFVYIAGK_2	-1	5550.7	102691_IM(UniMod:35)NGEADAMSLDGGFVYIAGK_2	0	IMNGEADAMSLDGGFVYIAGK	y5/-0.001	IM(UniMod:35)NGEADAMSLDGGFVYIAGK	2	102691_IM(UniMod:35)NGEADAMSLDGGFVYIAGK_2	1/P02787	1	y	5	light
1/P02787	1088.01	1226.64	79.2	1432504_y12_1_IM(UniMod:35)NGEADAMSLDGGFVYIAGK_2	-1	8366	102691_IM(UniMod:35)NGEADAMSLDGGFVYIAGK_2	0	IMNGEADAMSLDGGFVYIAGK	y12/0.006	IM(UniMod:35)NGEADAMSLDGGFVYIAGK	2	102691_IM(UniMod:35)NGEADAMSLDGGFVYIAGK_2	1/P02787	1	y	12	light
1/P02787	1088.01	1357.68	79.2	1432505_y13_1_IM(UniMod:35)NGEADAMSLDGGFVYIAGK_2	-1	4156.3	102691_IM(UniMod:35)NGEADAMSLDGGFVYIAGK_2	0	IMNGEADAMSLDGGFVYIAGK	y13/0.007	IM(UniMod:35)NGEADAMSLDGGFVYIAGK	2	102691_IM(UniMod:35)NGEADAMSLDGGFVYIAGK_2	1/P02787	1	y	13	light
1/P02787	1088.01	1226.64	73.5	1432513_y12_1_IMNGEADAM(UniMod:35)SLDGGFVYIAGK_2	-1	5295.5	102692_IMNGEADAM(UniMod:35)SLDGGFVYIAGK_2	0	IMNGEADAMSLDGGFVYIAGK	y12/0.018	IMNGEADAM(UniMod:35)SLDGGFVYIAGK	2	102692_IMNGEADAM(UniMod:35)SLDGGFVYIAGK_2	1/P02787	1	y	12	light
1/P02787	1088.01	911.499	73.5	1432512_y9_1_IMNGEADAM(UniMod:35)SLDGGFVYIAGK_2	-1	4706	102692_IMNGEADAM(UniMod:35)SLDGGFVYIAGK_2	0	IMNGEADAMSLDGGFVYIAGK	y9/-0.016	IMNGEADAM(UniMod:35)SLDGGFVYIAGK	2	102692_IMNGEADAM(UniMod:35)SLDGGFVYIAGK_2	1/P02787	1	y	9	light
1/P02787	1088.01	388.255	73.5	1432507_y4_1_IMNGEADAM(UniMod:35)SLDGGFVYIAGK_2	-1	5122	102692_IMNGEADAM(UniMod:35)SLDGGFVYIAGK_2	0	IMNGEADAMSLDGGFVYIAGK	y4/-0.005	IMNGEADAM(UniMod:35)SLDGGFVYIAGK	2	102692_IMNGEADAM(UniMod:35)SLDGGFVYIAGK_2	1/P02787	1	y	4	light
1/P02787	1088.01	551.319	73.5	1432509_y5_1_IMNGEADAM(UniMod:35)SLDGGFVYIAGK_2	-1	7398.4	102692_IMNGEADAM(UniMod:35)SLDGGFVYIAGK_2	0	IMNGEADAMSLDGGFVYIAGK	y5/-0.006	IMNGEADAM(UniMod:35)SLDGGFVYIAGK	2	102692_IMNGEADAM(UniMod:35)SLDGGFVYIAGK_2	1/P02787	1	y	5	light
1/P02787	1088.01	616.276	73.5	1432510_b6_1_IMNGEADAM(UniMod:35)SLDGGFVYIAGK_2	-1	5782.3	102692_IMNGEADAM(UniMod:35)SLDGGFVYIAGK_2	0	IMNGEADAMSLDGGFVYIAGK	b6/-0.012	IMNGEADAM(UniMod:35)SLDGGFVYIAGK	2	102692_IMNGEADAM(UniMod:35)SLDGGFVYIAGK_2	1/P02787	1	b	6	light
1/P02787	1088.01	416.196	73.5	1432508_b4_1_IMNGEADAM(UniMod:35)SLDGGFVYIAGK_2	-1	4142.4	102692_IMNGEADAM(UniMod:35)SLDGGFVYIAGK_2	0	IMNGEADAMSLDGGFVYIAGK	b4/0.011	IMNGEADAM(UniMod:35)SLDGGFVYIAGK	2	102692_IMNGEADAM(UniMod:35)SLDGGFVYIAGK_2	1/P02787	1	b	4	light
1/P02787	720.343	388.255	90.5	1432516_y4_1_IMNGEADAMSLDGGFVYIAGK_3	-1	4838.7	102693_IMNGEADAMSLDGGFVYIAGK_3	0	IMNGEADAMSLDGGFVYIAGK	y4/-0.001	IMNGEADAMSLDGGFVYIAGK	3	102693_IMNGEADAMSLDGGFVYIAGK_3	1/P02787	1	y	4	light
1/P02787	720.343	650.387	90.5	1432519_y6_1_IMNGEADAMSLDGGFVYIAGK_3	-1	5389.2	102693_IMNGEADAMSLDGGFVYIAGK_3	0	IMNGEADAMSLDGGFVYIAGK	y6/0.000	IMNGEADAMSLDGGFVYIAGK	3	102693_IMNGEADAMSLDGGFVYIAGK_3	1/P02787	1	y	6	light
1/P02787	720.343	911.499	90.5	1432524_y9_1_IMNGEADAMSLDGGFVYIAGK_3	-1	7890.7	102693_IMNGEADAMSLDGGFVYIAGK_3	0	IMNGEADAMSLDGGFVYIAGK	y9/-0.002	IMNGEADAMSLDGGFVYIAGK	3	102693_IMNGEADAMSLDGGFVYIAGK_3	1/P02787	1	y	9	light
1/P02787	720.343	551.319	90.5	1432518_y5_1_IMNGEADAMSLDGGFVYIAGK_3	-1	7070.8	102693_IMNGEADAMSLDGGFVYIAGK_3	0	IMNGEADAMSLDGGFVYIAGK	y5/0.002	IMNGEADAMSLDGGFVYIAGK	3	102693_IMNGEADAMSLDGGFVYIAGK_3	1/P02787	1	y	5	light
1/P02787	720.343	1026.53	90.5	1432527_y10_1_IMNGEADAMSLDGGFVYIAGK_3	-1	9504.1	102693_IMNGEADAMSLDGGFVYIAGK_3	0	IMNGEADAMSLDGGFVYIAGK	y10/0.006	IMNGEADAMSLDGGFVYIAGK	3	102693_IMNGEADAMSLDGGFVYIAGK_3	1/P02787	1	y	10	light
1/P02787	720.343	802.34	90.5	1432522_b8_1_IMNGEADAMSLDGGFVYIAGK_3	-1	4620.2	102693_IMNGEADAMSLDGGFVYIAGK_3	0	IMNGEADAMSLDGGFVYIAGK	b8/-0.001	IMNGEADAMSLDGGFVYIAGK	3	102693_IMNGEADAMSLDGGFVYIAGK_3	1/P02787	1	b	8	light
1/P02787	725.675	854.477	82.8	1432535_y8_1_IM(UniMod:35)NGEADAMSLDGGFVYIAGK_3	-1	3632.2	102694_IM(UniMod:35)NGEADAMSLDGGFVYIAGK_3	0	IMNGEADAMSLDGGFVYIAGK	y8/-0.017	IM(UniMod:35)NGEADAMSLDGGFVYIAGK	3	102694_IM(UniMod:35)NGEADAMSLDGGFVYIAGK_3	1/P02787	1	y	8	light
1/P02787	725.675	797.456	82.8	1432533_y7_1_IM(UniMod:35)NGEADAMSLDGGFVYIAGK_3	-1	4444.4	102694_IM(UniMod:35)NGEADAMSLDGGFVYIAGK_3	0	IMNGEADAMSLDGGFVYIAGK	y7/-0.003	IM(UniMod:35)NGEADAMSLDGGFVYIAGK	3	102694_IM(UniMod:35)NGEADAMSLDGGFVYIAGK_3	1/P02787	1	y	7	light
1/P02787	725.675	388.255	82.8	1432529_y4_1_IM(UniMod:35)NGEADAMSLDGGFVYIAGK_3	-1	3632.2	102694_IM(UniMod:35)NGEADAMSLDGGFVYIAGK_3	0	IMNGEADAMSLDGGFVYIAGK	y4/-0.012	IM(UniMod:35)NGEADAMSLDGGFVYIAGK	3	102694_IM(UniMod:35)NGEADAMSLDGGFVYIAGK_3	1/P02787	1	y	4	light
1/P02787	725.675	747.298	82.8	1432532_b7_1_IM(UniMod:35)NGEADAMSLDGGFVYIAGK_3	-1	5042.1	102694_IM(UniMod:35)NGEADAMSLDGGFVYIAGK_3	0	IMNGEADAMSLDGGFVYIAGK	b7/-0.013	IM(UniMod:35)NGEADAMSLDGGFVYIAGK	3	102694_IM(UniMod:35)NGEADAMSLDGGFVYIAGK_3	1/P02787	1	b	7	light
1/P02787	725.675	818.335	82.8	1432534_b8_1_IM(UniMod:35)NGEADAMSLDGGFVYIAGK_3	-1	4444.6	102694_IM(UniMod:35)NGEADAMSLDGGFVYIAGK_3	0	IMNGEADAMSLDGGFVYIAGK	b8/-0.018	IM(UniMod:35)NGEADAMSLDGGFVYIAGK	3	102694_IM(UniMod:35)NGEADAMSLDGGFVYIAGK_3	1/P02787	1	b	8	light
1/P02787	725.675	650.387	82.8	1432531_y6_1_IM(UniMod:35)NGEADAMSLDGGFVYIAGK_3	-1	6965.7	102694_IM(UniMod:35)NGEADAMSLDGGFVYIAGK_3	0	IMNGEADAMSLDGGFVYIAGK	y6/0.014	IM(UniMod:35)NGEADAMSLDGGFVYIAGK	3	102694_IM(UniMod:35)NGEADAMSLDGGFVYIAGK_3	1/P02787	1	y	6	light
1/P02787	731.006	1026.53	66.8	1432546_y10_1_IM(UniMod:35)NGEADAM(UniMod:35)SLDGGFVYIAGK_3	-1	10000	102695_IM(UniMod:35)NGEADAM(UniMod:35)SLDGGFVYIAGK_3	0	IMNGEADAMSLDGGFVYIAGK	y10/-0.004	IM(UniMod:35)NGEADAM(UniMod:35)SLDGGFVYIAGK	3	102695_IM(UniMod:35)NGEADAM(UniMod:35)SLDGGFVYIAGK_3	1/P02787	1	y	10	light
1/P02787	731.006	747.298	66.8	1432541_b7_1_IM(UniMod:35)NGEADAM(UniMod:35)SLDGGFVYIAGK_3	-1	4323.1	102695_IM(UniMod:35)NGEADAM(UniMod:35)SLDGGFVYIAGK_3	0	IMNGEADAMSLDGGFVYIAGK	b7/-0.006	IM(UniMod:35)NGEADAM(UniMod:35)SLDGGFVYIAGK	3	102695_IM(UniMod:35)NGEADAM(UniMod:35)SLDGGFVYIAGK_3	1/P02787	1	b	7	light
1/P02787	731.006	551.319	66.8	1432538_y5_1_IM(UniMod:35)NGEADAM(UniMod:35)SLDGGFVYIAGK_3	-1	4865.8	102695_IM(UniMod:35)NGEADAM(UniMod:35)SLDGGFVYIAGK_3	0	IMNGEADAMSLDGGFVYIAGK	y5/0.000	IM(UniMod:35)NGEADAM(UniMod:35)SLDGGFVYIAGK	3	102695_IM(UniMod:35)NGEADAM(UniMod:35)SLDGGFVYIAGK_3	1/P02787	1	y	5	light
1/P02787	731.006	561.234	66.8	1432539_b5_1_IM(UniMod:35)NGEADAM(UniMod:35)SLDGGFVYIAGK_3	-1	3563.9	102695_IM(UniMod:35)NGEADAM(UniMod:35)SLDGGFVYIAGK_3	0	IMNGEADAMSLDGGFVYIAGK	b5/0.009,b11-44^2/-0.009	IM(UniMod:35)NGEADAM(UniMod:35)SLDGGFVYIAGK	3	102695_IM(UniMod:35)NGEADAM(UniMod:35)SLDGGFVYIAGK_3	1/P02787	1	b	5	light
1/P02787	731.006	388.255	66.8	1432537_y4_1_IM(UniMod:35)NGEADAM(UniMod:35)SLDGGFVYIAGK_3	-1	3494.1	102695_IM(UniMod:35)NGEADAM(UniMod:35)SLDGGFVYIAGK_3	0	IMNGEADAMSLDGGFVYIAGK	y4/-0.001	IM(UniMod:35)NGEADAM(UniMod:35)SLDGGFVYIAGK	3	102695_IM(UniMod:35)NGEADAM(UniMod:35)SLDGGFVYIAGK_3	1/P02787	1	y	4	light
1/P02787	731.006	911.499	66.8	1432544_y9_1_IM(UniMod:35)NGEADAM(UniMod:35)SLDGGFVYIAGK_3	-1	4715	102695_IM(UniMod:35)NGEADAM(UniMod:35)SLDGGFVYIAGK_3	0	IMNGEADAMSLDGGFVYIAGK	y9/0.002	IM(UniMod:35)NGEADAM(UniMod:35)SLDGGFVYIAGK	3	102695_IM(UniMod:35)NGEADAM(UniMod:35)SLDGGFVYIAGK_3	1/P02787	1	y	9	light
1/Q86TI2	612.299	534.252	-5.3	1573467_LAEFQTDSQGK_2	-1	1259	102715_LAEFQTDSQGK_2	0	LAEFQTDSQGK	y5/-0.000	LAEFQTDSQGK	2	102715_LAEFQTDSQGK_2	1/Q86TI2	1	y	-1	light
1/Q86TI2	612.299	910.426	-5.3	1573472_LAEFQTDSQGK_2	-1	2257	102715_LAEFQTDSQGK_2	0	LAEFQTDSQGK	y8/-0.005	LAEFQTDSQGK	2	102715_LAEFQTDSQGK_2	1/Q86TI2	1	y	-1	light
1/Q86TI2	612.299	1039.47	-5.3	1573474_LAEFQTDSQGK_2	-1	1746.9	102715_LAEFQTDSQGK_2	0	LAEFQTDSQGK	y9/-0.000	LAEFQTDSQGK	2	102715_LAEFQTDSQGK_2	1/Q86TI2	1	y	-1	light
1/Q86TI2	612.299	635.299	-5.3	1573469_LAEFQTDSQGK_2	-1	2846.6	102715_LAEFQTDSQGK_2	0	LAEFQTDSQGK	y6/-0.001	LAEFQTDSQGK	2	102715_LAEFQTDSQGK_2	1/Q86TI2	1	y	-1	light
1/Q86TI2	612.299	419.225	-5.3	1573463_LAEFQTDSQGK_2	-1	1228.1	102715_LAEFQTDSQGK_2	0	LAEFQTDSQGK	y4/-0.001	LAEFQTDSQGK	2	102715_LAEFQTDSQGK_2	1/Q86TI2	1	y	-1	light
1/Q86TI2	612.299	763.358	-5.3	1573470_LAEFQTDSQGK_2	-1	1455.6	102715_LAEFQTDSQGK_2	0	LAEFQTDSQGK	y7/0.004	LAEFQTDSQGK	2	102715_LAEFQTDSQGK_2	1/Q86TI2	1	y	-1	light
1/Q99895	718.037	816.428	59.8	1573692_LAEHVELSDTIQVAC(UniMod:4)LPEK_3	-1	5039.8	102727_LAEHVELSDTIQVAC(UniMod:4)LPEK_3	0	LAEHVELSDTIQVACLPEK	y7/0.008	LAEHVELSDTIQVAC(UniMod:4)LPEK	3	102727_LAEHVELSDTIQVAC(UniMod:4)LPEK_3	1/Q99895	1	y	-1	light
1/Q99895	718.037	646.323	59.8	1573682_LAEHVELSDTIQVAC(UniMod:4)LPEK_3	-1	2437.9	102727_LAEHVELSDTIQVAC(UniMod:4)LPEK_3	0	LAEHVELSDTIQVACLPEK	y5/0.004,b12-45^2/-0.003	LAEHVELSDTIQVAC(UniMod:4)LPEK	3	102727_LAEHVELSDTIQVAC(UniMod:4)LPEK_3	1/Q99895	1	y	-1	light
1/Q99895	718.037	944.487	59.8	1573694_LAEHVELSDTIQVAC(UniMod:4)LPEK_3	-1	4126.2	102727_LAEHVELSDTIQVAC(UniMod:4)LPEK_3	0	LAEHVELSDTIQVACLPEK	y8/0.004	LAEHVELSDTIQVAC(UniMod:4)LPEK	3	102727_LAEHVELSDTIQVAC(UniMod:4)LPEK_3	1/Q99895	1	y	-1	light
1/Q99895	718.037	679.341	59.8	1573684_LAEHVELSDTIQVAC(UniMod:4)LPEK_3	-1	3306.1	102727_LAEHVELSDTIQVAC(UniMod:4)LPEK_3	0	LAEHVELSDTIQVACLPEK	b6/-0.004,m2:7/-0.004	LAEHVELSDTIQVAC(UniMod:4)LPEK	3	102727_LAEHVELSDTIQVAC(UniMod:4)LPEK_3	1/Q99895	1	b	-1	light
1/Q99895	718.037	1095.53	59.8	1573697_LAEHVELSDTIQVAC(UniMod:4)LPEK_3	-1	3795.3	102727_LAEHVELSDTIQVAC(UniMod:4)LPEK_3	0	LAEHVELSDTIQVACLPEK	b10/0.003,m2:11/0.003	LAEHVELSDTIQVAC(UniMod:4)LPEK	3	102727_LAEHVELSDTIQVAC(UniMod:4)LPEK_3	1/Q99895	1	b	-1	light
1/Q99895	718.037	373.208	59.8	1573672_LAEHVELSDTIQVAC(UniMod:4)LPEK_3	-1	10000	102727_LAEHVELSDTIQVAC(UniMod:4)LPEK_3	0	LAEHVELSDTIQVACLPEK	y3/0.001	LAEHVELSDTIQVAC(UniMod:4)LPEK	3	102727_LAEHVELSDTIQVAC(UniMod:4)LPEK_3	1/Q99895	1	y	-1	light
1/Q2T9J0	601.856	444.293	127.4	157148_ALGWFALLGVR_2	-1	2683.6	10278_ALGWFALLGVR_2	0	ALGWFALLGVR	y4/-0.000	ALGWFALLGVR	2	10278_ALGWFALLGVR_2	1/Q2T9J0	1	y	-1	light
1/Q2T9J0	601.856	557.377	127.4	157150_ALGWFALLGVR_2	-1	3017	10278_ALGWFALLGVR_2	0	ALGWFALLGVR	y5/-0.003	ALGWFALLGVR	2	10278_ALGWFALLGVR_2	1/Q2T9J0	1	y	-1	light
1/Q2T9J0	601.856	575.298	127.4	157151_ALGWFALLGVR_2	-1	1837.1	10278_ALGWFALLGVR_2	0	ALGWFALLGVR	b5/-0.005,m3:7/-0.005	ALGWFALLGVR	2	10278_ALGWFALLGVR_2	1/Q2T9J0	1	b	-1	light
1/Q2T9J0	601.856	628.414	127.4	157153_ALGWFALLGVR_2	-1	6010.4	10278_ALGWFALLGVR_2	0	ALGWFALLGVR	y6/-0.001	ALGWFALLGVR	2	10278_ALGWFALLGVR_2	1/Q2T9J0	1	y	-1	light
1/Q2T9J0	601.856	1018.58	127.4	157161_ALGWFALLGVR_2	-1	6338.5	10278_ALGWFALLGVR_2	0	ALGWFALLGVR	y9/-0.002	ALGWFALLGVR	2	10278_ALGWFALLGVR_2	1/Q2T9J0	1	y	-1	light
1/Q2T9J0	601.856	775.482	127.4	157157_ALGWFALLGVR_2	-1	10000	10278_ALGWFALLGVR_2	0	ALGWFALLGVR	y7/-0.004	ALGWFALLGVR	2	10278_ALGWFALLGVR_2	1/Q2T9J0	1	y	-1	light
1/P02787	637.33	1049.56	22.8	99789_y9_1_HSTIFENLANK_2	-1	3270.6	10279_HSTIFENLANK_2	0	HSTIFENLANK	y9/-0.002	HSTIFENLANK	2	10279_HSTIFENLANK_2	1/P02787	1	y	9	light
1/P02787	637.33	715.341	22.8	99783_b6_1_HSTIFENLANK_2	-1	1198.8	10279_HSTIFENLANK_2	0	HSTIFENLANK	b6/0.001	HSTIFENLANK	2	10279_HSTIFENLANK_2	1/P02787	1	b	6	light
1/P02787	637.33	829.384	22.8	99784_b7_1_HSTIFENLANK_2	-1	2384.3	10279_HSTIFENLANK_2	0	HSTIFENLANK	b7/-0.001	HSTIFENLANK	2	10279_HSTIFENLANK_2	1/P02787	1	b	7	light
1/P02787	637.33	835.431	22.8	99785_y7_1_HSTIFENLANK_2	-1	1899.2	10279_HSTIFENLANK_2	0	HSTIFENLANK	y7/-0.001	HSTIFENLANK	2	10279_HSTIFENLANK_2	1/P02787	1	y	7	light
1/P02787	637.33	439.23	22.8	99778_b4_1_HSTIFENLANK_2	-1	1323.4	10279_HSTIFENLANK_2	0	HSTIFENLANK	b4/0.002	HSTIFENLANK	2	10279_HSTIFENLANK_2	1/P02787	1	b	4	light
1/P02787	637.33	1136.59	22.8	99791_y10_1_HSTIFENLANK_2	-1	3072.5	10279_HSTIFENLANK_2	0	HSTIFENLANK	y10/-0.001	HSTIFENLANK	2	10279_HSTIFENLANK_2	1/P02787	1	y	10	light
1/O00154	693.365	728.34	26.2	1433893_b6_1_IMRPDDANVAGNVHGGTILK_3	-1	1689.3	102790_IMRPDDANVAGNVHGGTILK_3	0	IMRPDDANVAGNVHGGTILK	b6/0.001,b14-35^2/-0.003	IMRPDDANVAGNVHGGTILK	3	102790_IMRPDDANVAGNVHGGTILK_3	1/O00154	1	b	6	light
1/O00154	693.365	995.563	26.2	1433902_y10_1_IMRPDDANVAGNVHGGTILK_3	-1	1130.1	102790_IMRPDDANVAGNVHGGTILK_3	0	IMRPDDANVAGNVHGGTILK	y10/-0.001	IMRPDDANVAGNVHGGTILK	3	102790_IMRPDDANVAGNVHGGTILK_3	1/O00154	1	y	10	light
1/O00154	693.365	799.377	26.2	1433896_b7_1_IMRPDDANVAGNVHGGTILK_3	-1	1181.6	102790_IMRPDDANVAGNVHGGTILK_3	0	IMRPDDANVAGNVHGGTILK	b7/-0.005	IMRPDDANVAGNVHGGTILK	3	102790_IMRPDDANVAGNVHGGTILK_3	1/O00154	1	b	7	light
1/O00154	693.365	913.42	26.2	1433900_b8_1_IMRPDDANVAGNVHGGTILK_3	-1	3502.7	102790_IMRPDDANVAGNVHGGTILK_3	0	IMRPDDANVAGNVHGGTILK	b8/-0.011	IMRPDDANVAGNVHGGTILK	3	102790_IMRPDDANVAGNVHGGTILK_3	1/O00154	1	b	8	light
1/O00154	693.365	588.372	26.2	1433888_y6_1_IMRPDDANVAGNVHGGTILK_3	-1	1526.6	102790_IMRPDDANVAGNVHGGTILK_3	0	IMRPDDANVAGNVHGGTILK	y6/-0.003	IMRPDDANVAGNVHGGTILK	3	102790_IMRPDDANVAGNVHGGTILK_3	1/O00154	1	y	6	light
1/O00154	693.365	725.43	26.2	1433891_y7_1_IMRPDDANVAGNVHGGTILK_3	-1	1409.7	102790_IMRPDDANVAGNVHGGTILK_3	0	IMRPDDANVAGNVHGGTILK	y7/-0.006	IMRPDDANVAGNVHGGTILK	3	102790_IMRPDDANVAGNVHGGTILK_3	1/O00154	1	y	7	light
1/O00154	698.697	929.415	17.3	1433923_b8_1_IM(UniMod:35)RPDDANVAGNVHGGTILK_3	-1	1660.4	102791_IM(UniMod:35)RPDDANVAGNVHGGTILK_3	0	IMRPDDANVAGNVHGGTILK	b8/0.008	IM(UniMod:35)RPDDANVAGNVHGGTILK	3	102791_IM(UniMod:35)RPDDANVAGNVHGGTILK_3	1/O00154	1	b	8	light
1/O00154	698.697	995.563	17.3	1433926_y10_1_IM(UniMod:35)RPDDANVAGNVHGGTILK_3	-1	1139.7	102791_IM(UniMod:35)RPDDANVAGNVHGGTILK_3	0	IMRPDDANVAGNVHGGTILK	y10/-0.001	IM(UniMod:35)RPDDANVAGNVHGGTILK	3	102791_IM(UniMod:35)RPDDANVAGNVHGGTILK_3	1/O00154	1	y	10	light
1/O00154	698.697	725.43	17.3	1433919_y7_1_IM(UniMod:35)RPDDANVAGNVHGGTILK_3	-1	1400	102791_IM(UniMod:35)RPDDANVAGNVHGGTILK_3	0	IMRPDDANVAGNVHGGTILK	y7/-0.000	IM(UniMod:35)RPDDANVAGNVHGGTILK	3	102791_IM(UniMod:35)RPDDANVAGNVHGGTILK_3	1/O00154	1	y	7	light
1/O00154	698.697	465.211	17.3	1433910_b8_2_IM(UniMod:35)RPDDANVAGNVHGGTILK_3	-1	1227.5	102791_IM(UniMod:35)RPDDANVAGNVHGGTILK_3	0	IMRPDDANVAGNVHGGTILK	b8^2/-0.002,m11:15/-0.012	IM(UniMod:35)RPDDANVAGNVHGGTILK	3	102791_IM(UniMod:35)RPDDANVAGNVHGGTILK_3	1/O00154	2	b	8	light
1/O00154	698.697	588.372	17.3	1433916_y6_1_IM(UniMod:35)RPDDANVAGNVHGGTILK_3	-1	1028.9	102791_IM(UniMod:35)RPDDANVAGNVHGGTILK_3	0	IMRPDDANVAGNVHGGTILK	y6/-0.004	IM(UniMod:35)RPDDANVAGNVHGGTILK	3	102791_IM(UniMod:35)RPDDANVAGNVHGGTILK_3	1/O00154	1	y	6	light
1/O00154	698.697	1066.6	17.3	1433928_y11_1_IM(UniMod:35)RPDDANVAGNVHGGTILK_3	-1	890.1	102791_IM(UniMod:35)RPDDANVAGNVHGGTILK_3	0	IMRPDDANVAGNVHGGTILK	y11/0.001	IM(UniMod:35)RPDDANVAGNVHGGTILK	3	102791_IM(UniMod:35)RPDDANVAGNVHGGTILK_3	1/O00154	1	y	11	light
1/O00154	520.276	725.43	26.3	1433942_y7_1_IMRPDDANVAGNVHGGTILK_4	-1	2971.2	102792_IMRPDDANVAGNVHGGTILK_4	0	IMRPDDANVAGNVHGGTILK	y7/-0.002	IMRPDDANVAGNVHGGTILK	4	102792_IMRPDDANVAGNVHGGTILK_4	1/O00154	1	y	7	light
1/O00154	520.276	799.377	26.3	1433947_b7_1_IMRPDDANVAGNVHGGTILK_4	-1	3514.8	102792_IMRPDDANVAGNVHGGTILK_4	0	IMRPDDANVAGNVHGGTILK	b7/-0.001	IMRPDDANVAGNVHGGTILK	4	102792_IMRPDDANVAGNVHGGTILK_4	1/O00154	1	b	7	light
1/O00154	520.276	913.42	26.3	1433950_b8_1_IMRPDDANVAGNVHGGTILK_4	-1	6599.5	102792_IMRPDDANVAGNVHGGTILK_4	0	IMRPDDANVAGNVHGGTILK	b8/-0.002	IMRPDDANVAGNVHGGTILK	4	102792_IMRPDDANVAGNVHGGTILK_4	1/O00154	1	b	8	light
1/O00154	520.276	498.286	26.3	1433934_b4_1_IMRPDDANVAGNVHGGTILK_4	-1	4196.8	102792_IMRPDDANVAGNVHGGTILK_4	0	IMRPDDANVAGNVHGGTILK	b4/0.000,y10^2/0.001	IMRPDDANVAGNVHGGTILK	4	102792_IMRPDDANVAGNVHGGTILK_4	1/O00154	1	b	4	light
1/O00154	520.276	533.804	26.3	1433936_y11_2_IMRPDDANVAGNVHGGTILK_4	-1	10000	102792_IMRPDDANVAGNVHGGTILK_4	0	IMRPDDANVAGNVHGGTILK	y11^2/0.000	IMRPDDANVAGNVHGGTILK	4	102792_IMRPDDANVAGNVHGGTILK_4	1/O00154	2	y	11	light
1/O00154	520.276	728.34	26.3	1433944_b6_1_IMRPDDANVAGNVHGGTILK_4	-1	6309.7	102792_IMRPDDANVAGNVHGGTILK_4	0	IMRPDDANVAGNVHGGTILK	b6/-0.003,b14-35^2/-0.007	IMRPDDANVAGNVHGGTILK	4	102792_IMRPDDANVAGNVHGGTILK_4	1/O00154	1	b	6	light
1/O00154	524.274	533.804	18.9	1433961_y11_2_IM(UniMod:35)RPDDANVAGNVHGGTILK_4	-1	4191	102793_IM(UniMod:35)RPDDANVAGNVHGGTILK_4	0	IMRPDDANVAGNVHGGTILK	y11^2/-0.000	IM(UniMod:35)RPDDANVAGNVHGGTILK	4	102793_IM(UniMod:35)RPDDANVAGNVHGGTILK_4	1/O00154	2	y	11	light
1/O00154	524.274	588.372	18.9	1433964_y6_1_IM(UniMod:35)RPDDANVAGNVHGGTILK_4	-1	1962.4	102793_IM(UniMod:35)RPDDANVAGNVHGGTILK_4	0	IMRPDDANVAGNVHGGTILK	y6/0.001	IM(UniMod:35)RPDDANVAGNVHGGTILK	4	102793_IM(UniMod:35)RPDDANVAGNVHGGTILK_4	1/O00154	1	y	6	light
1/O00154	524.274	929.415	18.9	1433969_b8_1_IM(UniMod:35)RPDDANVAGNVHGGTILK_4	-1	2167.4	102793_IM(UniMod:35)RPDDANVAGNVHGGTILK_4	0	IMRPDDANVAGNVHGGTILK	b8/-0.005	IM(UniMod:35)RPDDANVAGNVHGGTILK	4	102793_IM(UniMod:35)RPDDANVAGNVHGGTILK_4	1/O00154	1	b	8	light
1/O00154	524.274	725.43	18.9	1433966_y7_1_IM(UniMod:35)RPDDANVAGNVHGGTILK_4	-1	2013	102793_IM(UniMod:35)RPDDANVAGNVHGGTILK_4	0	IMRPDDANVAGNVHGGTILK	y7/-0.001	IM(UniMod:35)RPDDANVAGNVHGGTILK	4	102793_IM(UniMod:35)RPDDANVAGNVHGGTILK_4	1/O00154	1	y	7	light
1/O00154	524.274	465.211	18.9	1433958_b8_2_IM(UniMod:35)RPDDANVAGNVHGGTILK_4	-1	1819.1	102793_IM(UniMod:35)RPDDANVAGNVHGGTILK_4	0	IMRPDDANVAGNVHGGTILK	b8^2/-0.001	IM(UniMod:35)RPDDANVAGNVHGGTILK	4	102793_IM(UniMod:35)RPDDANVAGNVHGGTILK_4	1/O00154	2	b	8	light
1/O00154	524.274	498.285	18.9	1433959_y10_2_IM(UniMod:35)RPDDANVAGNVHGGTILK_4	-1	1962.3	102793_IM(UniMod:35)RPDDANVAGNVHGGTILK_4	0	IMRPDDANVAGNVHGGTILK	y10^2/0.002	IM(UniMod:35)RPDDANVAGNVHGGTILK	4	102793_IM(UniMod:35)RPDDANVAGNVHGGTILK_4	1/O00154	2	y	10	light
1/P02787	425.223	445.277	24.2	99794_y4_1_HSTIFENLANK_3	-1	2609.4	10280_HSTIFENLANK_3	0	HSTIFENLANK	y4/0.002	HSTIFENLANK	3	10280_HSTIFENLANK_3	1/P02787	1	y	4	light
1/P02787	425.223	559.32	24.2	99795_y5_1_HSTIFENLANK_3	-1	5440.4	10280_HSTIFENLANK_3	0	HSTIFENLANK	y5/0.003	HSTIFENLANK	3	10280_HSTIFENLANK_3	1/P02787	1	y	5	light
1/P02787	425.223	829.384	24.2	99799_b7_1_HSTIFENLANK_3	-1	3147.6	10280_HSTIFENLANK_3	0	HSTIFENLANK	b7/0.001	HSTIFENLANK	3	10280_HSTIFENLANK_3	1/P02787	1	b	7	light
1/P02787	425.223	439.23	24.2	99793_b4_1_HSTIFENLANK_3	-1	10000	10280_HSTIFENLANK_3	0	HSTIFENLANK	b4/0.002	HSTIFENLANK	3	10280_HSTIFENLANK_3	1/P02787	1	b	4	light
1/P02787	425.223	688.362	24.2	99797_y6_1_HSTIFENLANK_3	-1	3395.2	10280_HSTIFENLANK_3	0	HSTIFENLANK	y6/0.002	HSTIFENLANK	3	10280_HSTIFENLANK_3	1/P02787	1	y	6	light
1/P02787	425.223	586.298	24.2	99796_b5_1_HSTIFENLANK_3	-1	4685.1	10280_HSTIFENLANK_3	0	HSTIFENLANK	b5/0.003	HSTIFENLANK	3	10280_HSTIFENLANK_3	1/P02787	1	b	5	light
1/P02787	539.278	603.321	27.3	99805_y5_1_HSTIFENLANKADR_3	-1	5463.2	10281_HSTIFENLANKADR_3	0	HSTIFENLANKADR	y5/0.005	HSTIFENLANKADR	3	10281_HSTIFENLANKADR_3	1/P02787	1	y	5	light
1/P02787	539.278	361.183	27.3	99801_y3_1_HSTIFENLANKADR_3	-1	2574.4	10281_HSTIFENLANKADR_3	0	HSTIFENLANKADR	y3/-0.005,b10-46^3/-0.007	HSTIFENLANKADR	3	10281_HSTIFENLANKADR_3	1/P02787	1	y	3	light
1/P02787	539.278	586.298	27.3	99804_b5_1_HSTIFENLANKADR_3	-1	3561.1	10281_HSTIFENLANKADR_3	0	HSTIFENLANKADR	b5/0.001,y5-17/0.005	HSTIFENLANKADR	3	10281_HSTIFENLANKADR_3	1/P02787	1	b	5	light
1/P02787	539.278	829.384	27.3	99809_b7_1_HSTIFENLANKADR_3	-1	4485.3	10281_HSTIFENLANKADR_3	0	HSTIFENLANKADR	b7/0.008	HSTIFENLANKADR	3	10281_HSTIFENLANKADR_3	1/P02787	1	b	7	light
1/P02787	539.278	439.23	27.3	99802_b4_1_HSTIFENLANKADR_3	-1	2431.9	10281_HSTIFENLANKADR_3	0	HSTIFENLANKADR	b4/0.002	HSTIFENLANKADR	3	10281_HSTIFENLANKADR_3	1/P02787	1	b	4	light
1/P02787	539.278	674.358	27.3	99806_y6_1_HSTIFENLANKADR_3	-1	7416.5	10281_HSTIFENLANKADR_3	0	HSTIFENLANKADR	y6/0.001,y12-44^2/-0.013	HSTIFENLANKADR	3	10281_HSTIFENLANKADR_3	1/P02787	1	y	6	light
1/P02787	784.883	618.321	81.3	99819_y5_1_HSTIFENLANKADRDQYELLC(UniMod:4)LDNTR_4	-1	4619.2	10282_HSTIFENLANKADRDQYELLC(UniMod:4)LDNTR_4	0	HSTIFENLANKADRDQYELLCLDNTR	y5/-0.002	HSTIFENLANKADRDQYELLC(UniMod:4)LDNTR	4	10282_HSTIFENLANKADRDQYELLC(UniMod:4)LDNTR_4	1/P02787	1	y	5	light
1/P02787	784.883	829.384	81.3	99822_b7_1_HSTIFENLANKADRDQYELLC(UniMod:4)LDNTR_4	-1	4975.3	10282_HSTIFENLANKADRDQYELLC(UniMod:4)LDNTR_4	0	HSTIFENLANKADRDQYELLCLDNTR	b7/-0.001	HSTIFENLANKADRDQYELLC(UniMod:4)LDNTR	4	10282_HSTIFENLANKADRDQYELLC(UniMod:4)LDNTR_4	1/P02787	1	b	7	light
1/P02787	784.883	390.21	81.3	99815_y3_1_HSTIFENLANKADRDQYELLC(UniMod:4)LDNTR_4	-1	7512	10282_HSTIFENLANKADRDQYELLC(UniMod:4)LDNTR_4	0	HSTIFENLANKADRDQYELLCLDNTR	y3/0.001,m4:6/0.008	HSTIFENLANKADRDQYELLC(UniMod:4)LDNTR	4	10282_HSTIFENLANKADRDQYELLC(UniMod:4)LDNTR_4	1/P02787	1	y	3	light
1/P02787	784.883	891.435	81.3	99823_y7_1_HSTIFENLANKADRDQYELLC(UniMod:4)LDNTR_4	-1	5176.1	10282_HSTIFENLANKADRDQYELLC(UniMod:4)LDNTR_4	0	HSTIFENLANKADRDQYELLCLDNTR	y7/0.003	HSTIFENLANKADRDQYELLC(UniMod:4)LDNTR	4	10282_HSTIFENLANKADRDQYELLC(UniMod:4)LDNTR_4	1/P02787	1	y	7	light
1/P02787	784.883	505.237	81.3	99817_y4_1_HSTIFENLANKADRDQYELLC(UniMod:4)LDNTR_4	-1	3592.8	10282_HSTIFENLANKADRDQYELLC(UniMod:4)LDNTR_4	0	HSTIFENLANKADRDQYELLCLDNTR	y4/0.004	HSTIFENLANKADRDQYELLC(UniMod:4)LDNTR	4	10282_HSTIFENLANKADRDQYELLC(UniMod:4)LDNTR_4	1/P02787	1	y	4	light
1/P02787	784.883	778.351	81.3	99821_y6_1_HSTIFENLANKADRDQYELLC(UniMod:4)LDNTR_4	-1	10000	10282_HSTIFENLANKADRDQYELLC(UniMod:4)LDNTR_4	0	HSTIFENLANKADRDQYELLCLDNTR	y6/-0.001	HSTIFENLANKADRDQYELLC(UniMod:4)LDNTR	4	10282_HSTIFENLANKADRDQYELLC(UniMod:4)LDNTR_4	1/P02787	1	y	6	light
1/P27487	615.964	921.515	30.4	99858_y7_1_HSYTASYDIYDLNKR_3	-1	1318.4	10285_HSYTASYDIYDLNKR_3	0	HSYTASYDIYDLNKR	y7/0.010	HSYTASYDIYDLNKR	3	10285_HSYTASYDIYDLNKR_3	1/P27487	1	y	7	light
1/P27487	615.964	925.369	30.4	99859_b8_1_HSYTASYDIYDLNKR_3	-1	2000	10285_HSYTASYDIYDLNKR_3	0	HSYTASYDIYDLNKR	b8/-0.000	HSYTASYDIYDLNKR	3	10285_HSYTASYDIYDLNKR_3	1/P27487	1	b	8	light
1/P27487	615.964	645.368	30.4	99851_y5_1_HSYTASYDIYDLNKR_3	-1	3722.6	10285_HSYTASYDIYDLNKR_3	0	HSYTASYDIYDLNKR	y5/-0.007	HSYTASYDIYDLNKR	3	10285_HSYTASYDIYDLNKR_3	1/P27487	1	y	5	light
1/P27487	615.964	530.341	30.4	99848_y4_1_HSYTASYDIYDLNKR_3	-1	2372.1	10285_HSYTASYDIYDLNKR_3	0	HSYTASYDIYDLNKR	y4/0.000	HSYTASYDIYDLNKR	3	10285_HSYTASYDIYDLNKR_3	1/P27487	1	y	4	light
1/P27487	615.964	647.278	30.4	99852_b6_1_HSYTASYDIYDLNKR_3	-1	1339.9	10285_HSYTASYDIYDLNKR_3	0	HSYTASYDIYDLNKR	b6/0.006	HSYTASYDIYDLNKR	3	10285_HSYTASYDIYDLNKR_3	1/P27487	1	b	6	light
1/P27487	615.964	808.431	30.4	99854_y6_1_HSYTASYDIYDLNKR_3	-1	2139.5	10285_HSYTASYDIYDLNKR_3	0	HSYTASYDIYDLNKR	y6/0.011	HSYTASYDIYDLNKR	3	10285_HSYTASYDIYDLNKR_3	1/P27487	1	y	6	light
1/Q86VB7	638.016	599.72	12.1	99230_b10_2_HYC(UniMod:4)NHNEDAGVTC(UniMod:4)SDGSDLELR_4	-1	10000	10287_HYC(UniMod:4)NHNEDAGVTC(UniMod:4)SDGSDLELR_4	0	HYCNHNEDAGVTCSDGSDLELR	b10^2/-0.002	HYC(UniMod:4)NHNEDAGVTC(UniMod:4)SDGSDLELR	4	10287_HYC(UniMod:4)NHNEDAGVTC(UniMod:4)SDGSDLELR_4	1/Q86VB7	2	b	10	light
1/Q86VB7	638.016	530.33	12.1	99224_y4_1_HYC(UniMod:4)NHNEDAGVTC(UniMod:4)SDGSDLELR_4	-1	7512.8	10287_HYC(UniMod:4)NHNEDAGVTC(UniMod:4)SDGSDLELR_4	0	HYCNHNEDAGVTCSDGSDLELR	y4/-0.000	HYC(UniMod:4)NHNEDAGVTC(UniMod:4)SDGSDLELR	4	10287_HYC(UniMod:4)NHNEDAGVTC(UniMod:4)SDGSDLELR_4	1/Q86VB7	1	y	4	light
1/Q86VB7	638.016	649.254	12.1	99232_b11_2_HYC(UniMod:4)NHNEDAGVTC(UniMod:4)SDGSDLELR_4	-1	4732.4	10287_HYC(UniMod:4)NHNEDAGVTC(UniMod:4)SDGSDLELR_4	0	HYCNHNEDAGVTCSDGSDLELR	b11^2/0.005	HYC(UniMod:4)NHNEDAGVTC(UniMod:4)SDGSDLELR	4	10287_HYC(UniMod:4)NHNEDAGVTC(UniMod:4)SDGSDLELR_4	1/Q86VB7	2	b	11	light
1/Q86VB7	638.016	789.41	12.1	99237_y7_1_HYC(UniMod:4)NHNEDAGVTC(UniMod:4)SDGSDLELR_4	-1	7028.6	10287_HYC(UniMod:4)NHNEDAGVTC(UniMod:4)SDGSDLELR_4	0	HYCNHNEDAGVTCSDGSDLELR	y7/-0.000	HYC(UniMod:4)NHNEDAGVTC(UniMod:4)SDGSDLELR	4	10287_HYC(UniMod:4)NHNEDAGVTC(UniMod:4)SDGSDLELR_4	1/Q86VB7	1	y	7	light
1/Q86VB7	638.016	645.357	12.1	99231_y5_1_HYC(UniMod:4)NHNEDAGVTC(UniMod:4)SDGSDLELR_4	-1	5171.3	10287_HYC(UniMod:4)NHNEDAGVTC(UniMod:4)SDGSDLELR_4	0	HYCNHNEDAGVTCSDGSDLELR	y5/0.002	HYC(UniMod:4)NHNEDAGVTC(UniMod:4)SDGSDLELR	4	10287_HYC(UniMod:4)NHNEDAGVTC(UniMod:4)SDGSDLELR_4	1/Q86VB7	1	y	5	light
1/Q86VB7	638.016	535.691	12.1	99225_b8_2_HYC(UniMod:4)NHNEDAGVTC(UniMod:4)SDGSDLELR_4	-1	3861.9	10287_HYC(UniMod:4)NHNEDAGVTC(UniMod:4)SDGSDLELR_4	0	HYCNHNEDAGVTCSDGSDLELR	b8^2/0.005	HYC(UniMod:4)NHNEDAGVTC(UniMod:4)SDGSDLELR	4	10287_HYC(UniMod:4)NHNEDAGVTC(UniMod:4)SDGSDLELR_4	1/Q86VB7	2	b	8	light
1/Q96IU4	525.783	404.25	2.3	1435287_y4_1_INAANYASVK_2	-1	1155.2	102883_INAANYASVK_2	0	INAANYASVK	y4/-0.001	INAANYASVK	2	102883_INAANYASVK_2	1/Q96IU4	1	y	4	light
1/Q96IU4	525.783	567.314	2.3	1435289_y5_1_INAANYASVK_2	-1	1019.4	102883_INAANYASVK_2	0	INAANYASVK	y5/0.000	INAANYASVK	2	102883_INAANYASVK_2	1/Q96IU4	1	y	5	light
1/Q96IU4	525.783	681.357	2.3	1435290_y6_1_INAANYASVK_2	-1	3067.9	102883_INAANYASVK_2	0	INAANYASVK	y6/-0.002	INAANYASVK	2	102883_INAANYASVK_2	1/Q96IU4	1	y	6	light
1/Q96IU4	525.783	752.394	2.3	1435291_y7_1_INAANYASVK_2	-1	3112.2	102883_INAANYASVK_2	0	INAANYASVK	y7/-0.001	INAANYASVK	2	102883_INAANYASVK_2	1/Q96IU4	1	y	7	light
1/Q96IU4	525.783	823.431	2.3	1435293_y8_1_INAANYASVK_2	-1	6999.6	102883_INAANYASVK_2	0	INAANYASVK	y8/-0.001	INAANYASVK	2	102883_INAANYASVK_2	1/Q96IU4	1	y	8	light
1/Q96IU4	525.783	937.474	2.3	1435295_y9_1_INAANYASVK_2	-1	3240.3	102883_INAANYASVK_2	0	INAANYASVK	y9/-0.002	INAANYASVK	2	102883_INAANYASVK_2	1/Q96IU4	1	y	9	light
1/P00738	573.775	717.378	-25.4	99293_y7_1_HYEGSTVPEK_2	-1	958.2	10292_HYEGSTVPEK_2	0	HYEGSTVPEK	y7/0.003	HYEGSTVPEK	2	10292_HYEGSTVPEK_2	1/P00738	1	y	7	light
1/P00738	573.775	1009.48	-25.4	99297_y9_1_HYEGSTVPEK_2	-1	2507.6	10292_HYEGSTVPEK_2	0	HYEGSTVPEK	y9/0.001	HYEGSTVPEK	2	10292_HYEGSTVPEK_2	1/P00738	1	y	9	light
1/P00738	573.775	774.342	-25.4	99294_b7_1_HYEGSTVPEK_2	-1	3256.6	10292_HYEGSTVPEK_2	0	HYEGSTVPEK	b7/0.001	HYEGSTVPEK	2	10292_HYEGSTVPEK_2	1/P00738	1	b	7	light
1/P00738	573.775	675.273	-25.4	99292_b6_1_HYEGSTVPEK_2	-1	1086	10292_HYEGSTVPEK_2	0	HYEGSTVPEK	b6/0.001	HYEGSTVPEK	2	10292_HYEGSTVPEK_2	1/P00738	1	b	6	light
1/P00738	573.775	846.42	-25.4	99295_y8_1_HYEGSTVPEK_2	-1	2964.1	10292_HYEGSTVPEK_2	0	HYEGSTVPEK	y8/0.002	HYEGSTVPEK	2	10292_HYEGSTVPEK_2	1/P00738	1	y	8	light
1/P00738	573.775	373.208	-25.4	99287_y3_1_HYEGSTVPEK_2	-1	10000	10292_HYEGSTVPEK_2	0	HYEGSTVPEK	y3/0.002	HYEGSTVPEK	2	10292_HYEGSTVPEK_2	1/P00738	1	y	3	light
1/Q5VST6	853.388	833.436	53.6	1435906_y8_1_INC(UniMod:4)NIFSYDYSGYGASSGKPTEK_3	-1	1378.3	102926_INC(UniMod:4)NIFSYDYSGYGASSGKPTEK_3	0	INCNIFSYDYSGYGASSGKPTEK	y8/-0.000	INC(UniMod:4)NIFSYDYSGYGASSGKPTEK	3	102926_INC(UniMod:4)NIFSYDYSGYGASSGKPTEK_3	1/Q5VST6	1	y	8	light
1/Q5VST6	853.388	502.208	53.6	1435901_b4_1_INC(UniMod:4)NIFSYDYSGYGASSGKPTEK_3	-1	1464.7	102926_INC(UniMod:4)NIFSYDYSGYGASSGKPTEK_3	0	INCNIFSYDYSGYGASSGKPTEK	b4/-0.004,m2:5/-0.004	INC(UniMod:4)NIFSYDYSGYGASSGKPTEK	3	102926_INC(UniMod:4)NIFSYDYSGYGASSGKPTEK_3	1/Q5VST6	1	b	4	light
1/Q5VST6	853.388	961.495	53.6	1435910_y10_1_INC(UniMod:4)NIFSYDYSGYGASSGKPTEK_3	-1	1507.1	102926_INC(UniMod:4)NIFSYDYSGYGASSGKPTEK_3	0	INCNIFSYDYSGYGASSGKPTEK	y10/-0.001	INC(UniMod:4)NIFSYDYSGYGASSGKPTEK	3	102926_INC(UniMod:4)NIFSYDYSGYGASSGKPTEK_3	1/Q5VST6	1	y	10	light
1/Q5VST6	853.388	474.256	53.6	1435900_y4_1_INC(UniMod:4)NIFSYDYSGYGASSGKPTEK_3	-1	3662.6	102926_INC(UniMod:4)NIFSYDYSGYGASSGKPTEK_3	0	INCNIFSYDYSGYGASSGKPTEK	y4/-0.002	INC(UniMod:4)NIFSYDYSGYGASSGKPTEK	3	102926_INC(UniMod:4)NIFSYDYSGYGASSGKPTEK_3	1/Q5VST6	1	y	4	light
1/Q5VST6	853.388	972.437	53.6	1435911_y18_2_INC(UniMod:4)NIFSYDYSGYGASSGKPTEK_3	-1	1743.2	102926_INC(UniMod:4)NIFSYDYSGYGASSGKPTEK_3	0	INCNIFSYDYSGYGASSGKPTEK	y18^2/-0.006	INC(UniMod:4)NIFSYDYSGYGASSGKPTEK	3	102926_INC(UniMod:4)NIFSYDYSGYGASSGKPTEK_3	1/Q5VST6	2	y	18	light
1/Q5VST6	853.388	388.165	53.6	1435899_b3_1_INC(UniMod:4)NIFSYDYSGYGASSGKPTEK_3	-1	1524.3	102926_INC(UniMod:4)NIFSYDYSGYGASSGKPTEK_3	0	INCNIFSYDYSGYGASSGKPTEK	b3/0.007,m3:5/0.007	INC(UniMod:4)NIFSYDYSGYGASSGKPTEK	3	102926_INC(UniMod:4)NIFSYDYSGYGASSGKPTEK_3	1/Q5VST6	1	b	3	light
1/P00738	637.822	845.473	-31.7	99306_y8_1_HYEGSTVPEKK_2	-1	2213.4	10293_HYEGSTVPEKK_2	0	HYEGSTVPEKK	y8/-0.004	HYEGSTVPEKK	2	10293_HYEGSTVPEKK_2	1/P00738	1	y	8	light
1/P00738	637.822	974.515	-31.7	99307_y9_1_HYEGSTVPEKK_2	-1	5462.5	10293_HYEGSTVPEKK_2	0	HYEGSTVPEKK	y9/0.003	HYEGSTVPEKK	2	10293_HYEGSTVPEKK_2	1/P00738	1	y	9	light
1/P00738	637.822	774.342	-31.7	99305_b7_1_HYEGSTVPEKK_2	-1	3950	10293_HYEGSTVPEKK_2	0	HYEGSTVPEKK	b7/-0.004	HYEGSTVPEKK	2	10293_HYEGSTVPEKK_2	1/P00738	1	b	7	light
1/P00738	637.822	501.303	-31.7	99301_y4_1_HYEGSTVPEKK_2	-1	9015.4	10293_HYEGSTVPEKK_2	0	HYEGSTVPEKK	y4/0.001	HYEGSTVPEKK	2	10293_HYEGSTVPEKK_2	1/P00738	1	y	4	light
1/P00738	637.822	1000.44	-31.7	99308_b9_1_HYEGSTVPEKK_2	-1	1911.3	10293_HYEGSTVPEKK_2	0	HYEGSTVPEKK	b9/-0.004	HYEGSTVPEKK	2	10293_HYEGSTVPEKK_2	1/P00738	1	b	9	light
1/P00738	637.822	1137.58	-31.7	99310_y10_1_HYEGSTVPEKK_2	-1	3391.7	10293_HYEGSTVPEKK_2	0	HYEGSTVPEKK	y10/-0.001	HYEGSTVPEKK	2	10293_HYEGSTVPEKK_2	1/P00738	1	y	10	light
1/P00738	425.551	487.194	-31.7	99313_b4_1_HYEGSTVPEKK_3	-1	935.8	10294_HYEGSTVPEKK_3	0	HYEGSTVPEKK	b4/0.001	HYEGSTVPEKK	3	10294_HYEGSTVPEKK_3	1/P00738	1	b	4	light
1/P00738	425.551	574.226	-31.7	99315_b5_1_HYEGSTVPEKK_3	-1	787	10294_HYEGSTVPEKK_3	0	HYEGSTVPEKK	b5/0.007	HYEGSTVPEKK	3	10294_HYEGSTVPEKK_3	1/P00738	1	b	5	light
1/P00738	425.551	501.303	-31.7	99314_y4_1_HYEGSTVPEKK_3	-1	10000	10294_HYEGSTVPEKK_3	0	HYEGSTVPEKK	y4/0.003	HYEGSTVPEKK	3	10294_HYEGSTVPEKK_3	1/P00738	1	y	4	light
1/P00738	425.551	404.25	-31.7	99311_y3_1_HYEGSTVPEKK_3	-1	642.9	10294_HYEGSTVPEKK_3	0	HYEGSTVPEKK	y3/0.001	HYEGSTVPEKK	3	10294_HYEGSTVPEKK_3	1/P00738	1	y	3	light
1/P00738	425.551	675.273	-31.7	99317_b6_1_HYEGSTVPEKK_3	-1	3804.5	10294_HYEGSTVPEKK_3	0	HYEGSTVPEKK	b6/0.003	HYEGSTVPEKK	3	10294_HYEGSTVPEKK_3	1/P00738	1	b	6	light
1/P00738	425.551	774.342	-31.7	99318_b7_1_HYEGSTVPEKK_3	-1	944.2	10294_HYEGSTVPEKK_3	0	HYEGSTVPEKK	b7/0.014	HYEGSTVPEKK	3	10294_HYEGSTVPEKK_3	1/P00738	1	b	7	light
1/Q6UWW8	632.309	706.325	23.3	1577058_LAFPEATEEEK_2	-1	991.4	102948_LAFPEATEEEK_2	0	LAFPEATEEEK	y6/-0.008	LAFPEATEEEK	2	102948_LAFPEATEEEK_2	1/Q6UWW8	1	y	-1	light
1/Q6UWW8	632.309	835.368	23.3	1577059_LAFPEATEEEK_2	-1	929	102948_LAFPEATEEEK_2	0	LAFPEATEEEK	y7/0.001	LAFPEATEEEK	2	102948_LAFPEATEEEK_2	1/Q6UWW8	1	y	-1	light
1/Q6UWW8	632.309	466.714	23.3	1577054_LAFPEATEEEK_2	-1	3237.3	102948_LAFPEATEEEK_2	0	LAFPEATEEEK	y8^2/0.005	LAFPEATEEEK	2	102948_LAFPEATEEEK_2	1/Q6UWW8	2	y	-1	light
1/Q6UWW8	632.309	1079.49	23.3	1577061_LAFPEATEEEK_2	-1	2008.4	102948_LAFPEATEEEK_2	0	LAFPEATEEEK	y9/0.008	LAFPEATEEEK	2	102948_LAFPEATEEEK_2	1/Q6UWW8	1	y	-1	light
1/Q6UWW8	632.309	932.421	23.3	1577060_LAFPEATEEEK_2	-1	10000	102948_LAFPEATEEEK_2	0	LAFPEATEEEK	y8/-0.001	LAFPEATEEEK	2	102948_LAFPEATEEEK_2	1/Q6UWW8	1	y	-1	light
1/Q6UWW8	632.309	540.248	23.3	1577056_LAFPEATEEEK_2	-1	4302.1	102948_LAFPEATEEEK_2	0	LAFPEATEEEK	y9^2/0.004	LAFPEATEEEK	2	102948_LAFPEATEEEK_2	1/Q6UWW8	2	y	-1	light
1/P68402	455.759	526.262	-27.9	6677_b5_1_GEKPNPLR_2	-1	120.2	1030_GEKPNPLR_2	0	GEKPNPLR	b5/0.007	GEKPNPLR	2	1030_GEKPNPLR_2	1/P68402	1	b	5	light
1/P68402	455.759	736.399	-27.9	6680_b7_1_GEKPNPLR_2	-1	106.9	1030_GEKPNPLR_2	0	GEKPNPLR	b7/0.017	GEKPNPLR	2	1030_GEKPNPLR_2	1/P68402	1	b	7	light
1/P68402	455.759	499.299	-27.9	6676_y4_1_GEKPNPLR_2	-1	591.9	1030_GEKPNPLR_2	0	GEKPNPLR	y4/0.006	GEKPNPLR	2	1030_GEKPNPLR_2	1/P68402	1	y	4	light
1/P68402	455.759	596.351	-27.9	6678_y5_1_GEKPNPLR_2	-1	10000	1030_GEKPNPLR_2	0	GEKPNPLR	y5/0.010	GEKPNPLR	2	1030_GEKPNPLR_2	1/P68402	1	y	5	light
1/P68402	455.759	724.446	-27.9	6679_y6_1_GEKPNPLR_2	-1	595.4	1030_GEKPNPLR_2	0	GEKPNPLR	y6/0.016	GEKPNPLR	2	1030_GEKPNPLR_2	1/P68402	1	y	6	light
1/P68402	455.759	385.256	-27.9	6674_y3_1_GEKPNPLR_2	-1	1038.6	1030_GEKPNPLR_2	0	GEKPNPLR	y3/0.002	GEKPNPLR	2	1030_GEKPNPLR_2	1/P68402	1	y	3	light
1/P07911	729.841	1013.44	63.3	1437139_y8_1_INFAC(UniMod:4)SYPLDMK_2	-1	6680.1	103015_INFAC(UniMod:4)SYPLDMK_2	0	INFACSYPLDMK	y8/-0.002	INFAC(UniMod:4)SYPLDMK	2	103015_INFAC(UniMod:4)SYPLDMK_2	1/P07911	1	y	8	light
1/P07911	729.841	853.412	63.3	1437138_y7_1_INFAC(UniMod:4)SYPLDMK_2	-1	4942.2	103015_INFAC(UniMod:4)SYPLDMK_2	0	INFACSYPLDMK	y7/-0.018	INFAC(UniMod:4)SYPLDMK	2	103015_INFAC(UniMod:4)SYPLDMK_2	1/P07911	1	y	7	light
1/P07911	729.841	375.203	63.3	1437131_b3_1_INFAC(UniMod:4)SYPLDMK_2	-1	4507.7	103015_INFAC(UniMod:4)SYPLDMK_2	0	INFACSYPLDMK	b3/0.005	INFAC(UniMod:4)SYPLDMK	2	103015_INFAC(UniMod:4)SYPLDMK_2	1/P07911	1	b	3	light
1/P07911	729.841	1231.55	63.3	1437141_y10_1_INFAC(UniMod:4)SYPLDMK_2	-1	3747.4	103015_INFAC(UniMod:4)SYPLDMK_2	0	INFACSYPLDMK	y10/0.017	INFAC(UniMod:4)SYPLDMK	2	103015_INFAC(UniMod:4)SYPLDMK_2	1/P07911	1	y	10	light
1/P07911	729.841	1084.48	63.3	1437140_y9_1_INFAC(UniMod:4)SYPLDMK_2	-1	4127.6	103015_INFAC(UniMod:4)SYPLDMK_2	0	INFACSYPLDMK	y9/0.014	INFAC(UniMod:4)SYPLDMK	2	103015_INFAC(UniMod:4)SYPLDMK_2	1/P07911	1	y	9	light
1/P07911	729.841	603.317	63.3	1437135_y5_1_INFAC(UniMod:4)SYPLDMK_2	-1	6300	103015_INFAC(UniMod:4)SYPLDMK_2	0	INFACSYPLDMK	y5/-0.003	INFAC(UniMod:4)SYPLDMK	2	103015_INFAC(UniMod:4)SYPLDMK_2	1/P07911	1	y	5	light
1/P02787	753.33	459.256	41	1437913_y5_1_INHC(UniMod:4)RFDEFFSEGC(UniMod:4)APGSK_3	-1	1360.6	103073_INHC(UniMod:4)RFDEFFSEGC(UniMod:4)APGSK_3	0	INHCRFDEFFSEGCAPGSK	y5/0.001	INHC(UniMod:4)RFDEFFSEGC(UniMod:4)APGSK	3	103073_INHC(UniMod:4)RFDEFFSEGC(UniMod:4)APGSK_3	1/P02787	1	y	5	light
1/P02787	753.33	536.735	41	1437916_b8_2_INHC(UniMod:4)RFDEFFSEGC(UniMod:4)APGSK_3	-1	1298.9	103073_INHC(UniMod:4)RFDEFFSEGC(UniMod:4)APGSK_3	0	INHCRFDEFFSEGCAPGSK	[b8^2/0.015]	INHC(UniMod:4)RFDEFFSEGC(UniMod:4)APGSK	3	103073_INHC(UniMod:4)RFDEFFSEGC(UniMod:4)APGSK_3	1/P02787	2	b	8	light
1/P02787	753.33	676.308	41	1437919_y7_1_INHC(UniMod:4)RFDEFFSEGC(UniMod:4)APGSK_3	-1	2140.3	103073_INHC(UniMod:4)RFDEFFSEGC(UniMod:4)APGSK_3	0	INHCRFDEFFSEGCAPGSK	y7/-0.011	INHC(UniMod:4)RFDEFFSEGC(UniMod:4)APGSK	3	103073_INHC(UniMod:4)RFDEFFSEGC(UniMod:4)APGSK_3	1/P02787	1	y	7	light
1/P02787	753.33	610.269	41	1437917_b9_2_INHC(UniMod:4)RFDEFFSEGC(UniMod:4)APGSK_3	-1	1891.7	103073_INHC(UniMod:4)RFDEFFSEGC(UniMod:4)APGSK_3	0	INHCRFDEFFSEGCAPGSK	b9^2/0.002	INHC(UniMod:4)RFDEFFSEGC(UniMod:4)APGSK	3	103073_INHC(UniMod:4)RFDEFFSEGC(UniMod:4)APGSK_3	1/P02787	2	b	9	light
1/P02787	753.33	892.383	41	1437926_y9_1_INHC(UniMod:4)RFDEFFSEGC(UniMod:4)APGSK_3	-1	3259.6	103073_INHC(UniMod:4)RFDEFFSEGC(UniMod:4)APGSK_3	0	INHCRFDEFFSEGCAPGSK	y9/-0.005	INHC(UniMod:4)RFDEFFSEGC(UniMod:4)APGSK	3	103073_INHC(UniMod:4)RFDEFFSEGC(UniMod:4)APGSK_3	1/P02787	1	y	9	light
1/P02787	753.33	388.219	41	1437912_y4_1_INHC(UniMod:4)RFDEFFSEGC(UniMod:4)APGSK_3	-1	10000	103073_INHC(UniMod:4)RFDEFFSEGC(UniMod:4)APGSK_3	0	INHCRFDEFFSEGCAPGSK	y4/0.003	INHC(UniMod:4)RFDEFFSEGC(UniMod:4)APGSK	3	103073_INHC(UniMod:4)RFDEFFSEGC(UniMod:4)APGSK_3	1/P02787	1	y	4	light
1/P02787	565.249	619.287	41.4	1437945_y6_1_INHC(UniMod:4)RFDEFFSEGC(UniMod:4)APGSK_4	-1	1874.2	103074_INHC(UniMod:4)RFDEFFSEGC(UniMod:4)APGSK_4	0	INHCRFDEFFSEGCAPGSK	y6/0.004	INHC(UniMod:4)RFDEFFSEGC(UniMod:4)APGSK	4	103074_INHC(UniMod:4)RFDEFFSEGC(UniMod:4)APGSK_4	1/P02787	1	y	6	light
1/P02787	565.249	676.308	41.4	1437947_y7_1_INHC(UniMod:4)RFDEFFSEGC(UniMod:4)APGSK_4	-1	4932.4	103074_INHC(UniMod:4)RFDEFFSEGC(UniMod:4)APGSK_4	0	INHCRFDEFFSEGCAPGSK	y7/0.002	INHC(UniMod:4)RFDEFFSEGC(UniMod:4)APGSK	4	103074_INHC(UniMod:4)RFDEFFSEGC(UniMod:4)APGSK_4	1/P02787	1	y	7	light
1/P02787	565.249	683.803	41.4	1437949_b10_2_INHC(UniMod:4)RFDEFFSEGC(UniMod:4)APGSK_4	-1	2106.3	103074_INHC(UniMod:4)RFDEFFSEGC(UniMod:4)APGSK_4	0	INHCRFDEFFSEGCAPGSK	b10^2/-0.003	INHC(UniMod:4)RFDEFFSEGC(UniMod:4)APGSK	4	103074_INHC(UniMod:4)RFDEFFSEGC(UniMod:4)APGSK_4	1/P02787	2	b	10	light
1/P02787	565.249	388.219	41.4	1437935_y4_1_INHC(UniMod:4)RFDEFFSEGC(UniMod:4)APGSK_4	-1	10000	103074_INHC(UniMod:4)RFDEFFSEGC(UniMod:4)APGSK_4	0	INHCRFDEFFSEGCAPGSK	y4/0.001	INHC(UniMod:4)RFDEFFSEGC(UniMod:4)APGSK	4	103074_INHC(UniMod:4)RFDEFFSEGC(UniMod:4)APGSK_4	1/P02787	1	y	4	light
1/P02787	565.249	459.256	41.4	1437938_y5_1_INHC(UniMod:4)RFDEFFSEGC(UniMod:4)APGSK_4	-1	3802.8	103074_INHC(UniMod:4)RFDEFFSEGC(UniMod:4)APGSK_4	0	INHCRFDEFFSEGCAPGSK	y5/0.002	INHC(UniMod:4)RFDEFFSEGC(UniMod:4)APGSK	4	103074_INHC(UniMod:4)RFDEFFSEGC(UniMod:4)APGSK_4	1/P02787	1	y	5	light
1/P02787	565.249	610.269	41.4	1437944_b9_2_INHC(UniMod:4)RFDEFFSEGC(UniMod:4)APGSK_4	-1	2404.8	103074_INHC(UniMod:4)RFDEFFSEGC(UniMod:4)APGSK_4	0	INHCRFDEFFSEGCAPGSK	b9^2/0.002	INHC(UniMod:4)RFDEFFSEGC(UniMod:4)APGSK	4	103074_INHC(UniMod:4)RFDEFFSEGC(UniMod:4)APGSK_4	1/P02787	2	b	9	light
1/P02787	796.028	1020.48	30.1	1437977_y10_1_INHC(UniMod:4)RFDEFFSEGC(UniMod:4)APGSKK_3	-1	1923.8	103075_INHC(UniMod:4)RFDEFFSEGC(UniMod:4)APGSKK_3	0	INHCRFDEFFSEGCAPGSKK	[y10/0.011]	INHC(UniMod:4)RFDEFFSEGC(UniMod:4)APGSKK	3	103075_INHC(UniMod:4)RFDEFFSEGC(UniMod:4)APGSKK_3	1/P02787	1	y	10	light
1/P02787	796.028	587.351	30.1	1437967_y6_1_INHC(UniMod:4)RFDEFFSEGC(UniMod:4)APGSKK_3	-1	928.4	103075_INHC(UniMod:4)RFDEFFSEGC(UniMod:4)APGSKK_3	0	INHCRFDEFFSEGCAPGSKK	y6/0.005	INHC(UniMod:4)RFDEFFSEGC(UniMod:4)APGSKK	3	103075_INHC(UniMod:4)RFDEFFSEGC(UniMod:4)APGSKK_3	1/P02787	1	y	6	light
1/P02787	796.028	516.314	30.1	1437965_y5_1_INHC(UniMod:4)RFDEFFSEGC(UniMod:4)APGSKK_3	-1	3746	103075_INHC(UniMod:4)RFDEFFSEGC(UniMod:4)APGSKK_3	0	INHCRFDEFFSEGCAPGSKK	y5/0.001	INHC(UniMod:4)RFDEFFSEGC(UniMod:4)APGSKK	3	103075_INHC(UniMod:4)RFDEFFSEGC(UniMod:4)APGSKK_3	1/P02787	1	y	5	light
1/P02787	796.028	536.735	30.1	1437966_b8_2_INHC(UniMod:4)RFDEFFSEGC(UniMod:4)APGSKK_3	-1	1257	103075_INHC(UniMod:4)RFDEFFSEGC(UniMod:4)APGSKK_3	0	INHCRFDEFFSEGCAPGSKK	b8^2/-0.006	INHC(UniMod:4)RFDEFFSEGC(UniMod:4)APGSKK	3	103075_INHC(UniMod:4)RFDEFFSEGC(UniMod:4)APGSKK_3	1/P02787	2	b	8	light
1/P02787	796.028	943.42	30.1	1437975_b7_1_INHC(UniMod:4)RFDEFFSEGC(UniMod:4)APGSKK_3	-1	1050.9	103075_INHC(UniMod:4)RFDEFFSEGC(UniMod:4)APGSKK_3	0	INHCRFDEFFSEGCAPGSKK	b7/0.019	INHC(UniMod:4)RFDEFFSEGC(UniMod:4)APGSKK	3	103075_INHC(UniMod:4)RFDEFFSEGC(UniMod:4)APGSKK_3	1/P02787	1	b	7	light
1/P02787	796.028	610.269	30.1	1437968_b9_2_INHC(UniMod:4)RFDEFFSEGC(UniMod:4)APGSKK_3	-1	1139.1	103075_INHC(UniMod:4)RFDEFFSEGC(UniMod:4)APGSKK_3	0	INHCRFDEFFSEGCAPGSKK	b9^2/0.003	INHC(UniMod:4)RFDEFFSEGC(UniMod:4)APGSKK	3	103075_INHC(UniMod:4)RFDEFFSEGC(UniMod:4)APGSKK_3	1/P02787	2	b	9	light
1/P02787	597.273	516.314	30.8	1437985_y5_1_INHC(UniMod:4)RFDEFFSEGC(UniMod:4)APGSKK_4	-1	6112.3	103076_INHC(UniMod:4)RFDEFFSEGC(UniMod:4)APGSKK_4	0	INHCRFDEFFSEGCAPGSKK	y5/-0.002	INHC(UniMod:4)RFDEFFSEGC(UniMod:4)APGSKK	4	103076_INHC(UniMod:4)RFDEFFSEGC(UniMod:4)APGSKK_4	1/P02787	1	y	5	light
1/P02787	597.273	610.269	30.8	1437988_b9_2_INHC(UniMod:4)RFDEFFSEGC(UniMod:4)APGSKK_4	-1	1228.8	103076_INHC(UniMod:4)RFDEFFSEGC(UniMod:4)APGSKK_4	0	INHCRFDEFFSEGCAPGSKK	b9^2/0.001	INHC(UniMod:4)RFDEFFSEGC(UniMod:4)APGSKK	4	103076_INHC(UniMod:4)RFDEFFSEGC(UniMod:4)APGSKK_4	1/P02787	2	b	9	light
1/P02787	597.273	587.351	30.8	1437987_y6_1_INHC(UniMod:4)RFDEFFSEGC(UniMod:4)APGSKK_4	-1	1024.6	103076_INHC(UniMod:4)RFDEFFSEGC(UniMod:4)APGSKK_4	0	INHCRFDEFFSEGCAPGSKK	y6/-0.015	INHC(UniMod:4)RFDEFFSEGC(UniMod:4)APGSKK	4	103076_INHC(UniMod:4)RFDEFFSEGC(UniMod:4)APGSKK_4	1/P02787	1	y	6	light
1/P02787	597.273	536.735	30.8	1437986_b8_2_INHC(UniMod:4)RFDEFFSEGC(UniMod:4)APGSKK_4	-1	891.8	103076_INHC(UniMod:4)RFDEFFSEGC(UniMod:4)APGSKK_4	0	INHCRFDEFFSEGCAPGSKK	b8^2/-0.008	INHC(UniMod:4)RFDEFFSEGC(UniMod:4)APGSKK	4	103076_INHC(UniMod:4)RFDEFFSEGC(UniMod:4)APGSKK_4	1/P02787	2	b	8	light
1/P02787	597.273	419.261	30.8	1437982_y4_1_INHC(UniMod:4)RFDEFFSEGC(UniMod:4)APGSKK_4	-1	1097.5	103076_INHC(UniMod:4)RFDEFFSEGC(UniMod:4)APGSKK_4	0	INHCRFDEFFSEGCAPGSKK	y4/-0.002	INHC(UniMod:4)RFDEFFSEGC(UniMod:4)APGSKK	4	103076_INHC(UniMod:4)RFDEFFSEGC(UniMod:4)APGSKK_4	1/P02787	1	y	4	light
1/P02787	597.273	804.403	30.8	1437993_y8_1_INHC(UniMod:4)RFDEFFSEGC(UniMod:4)APGSKK_4	-1	814.6	103076_INHC(UniMod:4)RFDEFFSEGC(UniMod:4)APGSKK_4	0	INHCRFDEFFSEGCAPGSKK	y8/0.002	INHC(UniMod:4)RFDEFFSEGC(UniMod:4)APGSKK	4	103076_INHC(UniMod:4)RFDEFFSEGC(UniMod:4)APGSKK_4	1/P02787	1	y	8	light
1/P02787	478.02	510.743	31.1	1438007_y10_2_INHC(UniMod:4)RFDEFFSEGC(UniMod:4)APGSKK_5	-1	5591.7	103077_INHC(UniMod:4)RFDEFFSEGC(UniMod:4)APGSKK_5	0	INHCRFDEFFSEGCAPGSKK	y10^2/0.002	INHC(UniMod:4)RFDEFFSEGC(UniMod:4)APGSKK	5	103077_INHC(UniMod:4)RFDEFFSEGC(UniMod:4)APGSKK_5	1/P02787	2	y	10	light
1/P02787	478.02	610.269	31.1	1438011_b9_2_INHC(UniMod:4)RFDEFFSEGC(UniMod:4)APGSKK_5	-1	4103.6	103077_INHC(UniMod:4)RFDEFFSEGC(UniMod:4)APGSKK_5	0	INHCRFDEFFSEGCAPGSKK	b9^2/-0.004	INHC(UniMod:4)RFDEFFSEGC(UniMod:4)APGSKK	5	103077_INHC(UniMod:4)RFDEFFSEGC(UniMod:4)APGSKK_5	1/P02787	2	b	9	light
1/P02787	478.02	402.705	31.1	1438002_y8_2_INHC(UniMod:4)RFDEFFSEGC(UniMod:4)APGSKK_5	-1	1239.5	103077_INHC(UniMod:4)RFDEFFSEGC(UniMod:4)APGSKK_5	0	INHCRFDEFFSEGCAPGSKK	y8^2/-0.009	INHC(UniMod:4)RFDEFFSEGC(UniMod:4)APGSKK	5	103077_INHC(UniMod:4)RFDEFFSEGC(UniMod:4)APGSKK_5	1/P02787	2	y	8	light
1/P02787	478.02	472.214	31.1	1438006_b7_2_INHC(UniMod:4)RFDEFFSEGC(UniMod:4)APGSKK_5	-1	858.3	103077_INHC(UniMod:4)RFDEFFSEGC(UniMod:4)APGSKK_5	0	INHCRFDEFFSEGCAPGSKK	b7^2/-0.007	INHC(UniMod:4)RFDEFFSEGC(UniMod:4)APGSKK	5	103077_INHC(UniMod:4)RFDEFFSEGC(UniMod:4)APGSKK_5	1/P02787	2	b	7	light
1/P02787	478.02	516.314	31.1	1438008_y5_1_INHC(UniMod:4)RFDEFFSEGC(UniMod:4)APGSKK_5	-1	3966.7	103077_INHC(UniMod:4)RFDEFFSEGC(UniMod:4)APGSKK_5	0	INHCRFDEFFSEGCAPGSKK	y5/0.004	INHC(UniMod:4)RFDEFFSEGC(UniMod:4)APGSKK	5	103077_INHC(UniMod:4)RFDEFFSEGC(UniMod:4)APGSKK_5	1/P02787	1	y	5	light
1/P02787	478.02	536.735	31.1	1438009_b8_2_INHC(UniMod:4)RFDEFFSEGC(UniMod:4)APGSKK_5	-1	2016.8	103077_INHC(UniMod:4)RFDEFFSEGC(UniMod:4)APGSKK_5	0	INHCRFDEFFSEGCAPGSKK	b8^2/-0.005	INHC(UniMod:4)RFDEFFSEGC(UniMod:4)APGSKK	5	103077_INHC(UniMod:4)RFDEFFSEGC(UniMod:4)APGSKK_5	1/P02787	2	b	8	light
1/Q8WWY8	607.812	365.193	-15.7	1438030_b3_1_INHEPTTFQK_2	-1	1720.3	103079_INHEPTTFQK_2	0	INHEPTTFQK	b3/0.001	INHEPTTFQK	2	103079_INHEPTTFQK_2	1/Q8WWY8	1	b	3	light
1/Q8WWY8	607.812	987.489	-15.7	1438039_y8_1_INHEPTTFQK_2	-1	1141.5	103079_INHEPTTFQK_2	0	INHEPTTFQK	y8/0.003	INHEPTTFQK	2	103079_INHEPTTFQK_2	1/Q8WWY8	1	y	8	light
1/Q8WWY8	607.812	721.388	-15.7	1438038_y6_1_INHEPTTFQK_2	-1	1564.1	103079_INHEPTTFQK_2	0	INHEPTTFQK	y6/0.006	INHEPTTFQK	2	103079_INHEPTTFQK_2	1/Q8WWY8	1	y	6	light
1/Q8WWY8	607.812	523.287	-15.7	1438035_y4_1_INHEPTTFQK_2	-1	651	103079_INHEPTTFQK_2	0	INHEPTTFQK	y4/-0.008	INHEPTTFQK	2	103079_INHEPTTFQK_2	1/Q8WWY8	1	y	4	light
1/Q8WWY8	607.812	551.27	-15.7	1438036_y9_2_INHEPTTFQK_2	-1	829.3	103079_INHEPTTFQK_2	0	INHEPTTFQK	y9^2/0.009	INHEPTTFQK	2	103079_INHEPTTFQK_2	1/Q8WWY8	2	y	9	light
1/Q8WWY8	607.812	494.236	-15.7	1438033_b4_1_INHEPTTFQK_2	-1	2407.7	103079_INHEPTTFQK_2	0	INHEPTTFQK	b4/0.007,y8^2/-0.005	INHEPTTFQK	2	103079_INHEPTTFQK_2	1/Q8WWY8	1	b	4	light
1/O75608	778.935	1044.57	112.5	1579186_LAGVTALSC(UniMod:4)WLPLR_2	-1	4937.4	103085_LAGVTALSC(UniMod:4)WLPLR_2	0	LAGVTALSCWLPLR	y8/-0.006	LAGVTALSC(UniMod:4)WLPLR	2	103085_LAGVTALSC(UniMod:4)WLPLR_2	1/O75608	1	y	-1	light
1/O75608	778.935	844.45	112.5	1579181_LAGVTALSC(UniMod:4)WLPLR_2	-1	2641.1	103085_LAGVTALSC(UniMod:4)WLPLR_2	0	LAGVTALSCWLPLR	y6/-0.005	LAGVTALSC(UniMod:4)WLPLR	2	103085_LAGVTALSC(UniMod:4)WLPLR_2	1/O75608	1	y	-1	light
1/O75608	778.935	385.256	112.5	1579173_LAGVTALSC(UniMod:4)WLPLR_2	-1	10000	103085_LAGVTALSC(UniMod:4)WLPLR_2	0	LAGVTALSCWLPLR	y3/-0.002,m4:7/0.009	LAGVTALSC(UniMod:4)WLPLR	2	103085_LAGVTALSC(UniMod:4)WLPLR_2	1/O75608	1	y	-1	light
1/O75608	778.935	1115.6	112.5	1579189_LAGVTALSC(UniMod:4)WLPLR_2	-1	4001	103085_LAGVTALSC(UniMod:4)WLPLR_2	0	LAGVTALSCWLPLR	y9/-0.003	LAGVTALSC(UniMod:4)WLPLR	2	103085_LAGVTALSC(UniMod:4)WLPLR_2	1/O75608	1	y	-1	light
1/O75608	778.935	1216.65	112.5	1579191_LAGVTALSC(UniMod:4)WLPLR_2	-1	8609.2	103085_LAGVTALSC(UniMod:4)WLPLR_2	0	LAGVTALSCWLPLR	y10/-0.007	LAGVTALSC(UniMod:4)WLPLR	2	103085_LAGVTALSC(UniMod:4)WLPLR_2	1/O75608	1	y	-1	light
1/O75608	778.935	931.482	112.5	1579183_LAGVTALSC(UniMod:4)WLPLR_2	-1	8247.2	103085_LAGVTALSC(UniMod:4)WLPLR_2	0	LAGVTALSCWLPLR	y7/-0.003,m4:11/0.008	LAGVTALSC(UniMod:4)WLPLR	2	103085_LAGVTALSC(UniMod:4)WLPLR_2	1/O75608	1	y	-1	light
1/O75608	519.625	931.482	109.7	1579214_LAGVTALSC(UniMod:4)WLPLR_3	-1	1932.4	103086_LAGVTALSC(UniMod:4)WLPLR_3	0	LAGVTALSCWLPLR	y7/-0.014,m4:11/-0.003	LAGVTALSC(UniMod:4)WLPLR	3	103086_LAGVTALSC(UniMod:4)WLPLR_3	1/O75608	1	y	-1	light
1/O75608	519.625	385.256	109.7	1579195_LAGVTALSC(UniMod:4)WLPLR_3	-1	10000	103086_LAGVTALSC(UniMod:4)WLPLR_3	0	LAGVTALSCWLPLR	y3/-0.005,m4:7/0.006	LAGVTALSC(UniMod:4)WLPLR	3	103086_LAGVTALSC(UniMod:4)WLPLR_3	1/O75608	1	y	-1	light
1/O75608	519.625	626.387	109.7	1579206_LAGVTALSC(UniMod:4)WLPLR_3	-1	1304.1	103086_LAGVTALSC(UniMod:4)WLPLR_3	0	LAGVTALSCWLPLR	b7/-0.007	LAGVTALSC(UniMod:4)WLPLR	3	103086_LAGVTALSC(UniMod:4)WLPLR_3	1/O75608	1	b	-1	light
1/O75608	519.625	684.419	109.7	1579207_LAGVTALSC(UniMod:4)WLPLR_3	-1	3785.5	103086_LAGVTALSC(UniMod:4)WLPLR_3	0	LAGVTALSCWLPLR	y5/-0.007	LAGVTALSC(UniMod:4)WLPLR	3	103086_LAGVTALSC(UniMod:4)WLPLR_3	1/O75608	1	y	-1	light
1/O75608	519.625	498.34	109.7	1579201_LAGVTALSC(UniMod:4)WLPLR_3	-1	6065.1	103086_LAGVTALSC(UniMod:4)WLPLR_3	0	LAGVTALSCWLPLR	y4/-0.001	LAGVTALSC(UniMod:4)WLPLR	3	103086_LAGVTALSC(UniMod:4)WLPLR_3	1/O75608	1	y	-1	light
1/O75608	519.625	513.303	109.7	1579202_LAGVTALSC(UniMod:4)WLPLR_3	-1	1697.2	103086_LAGVTALSC(UniMod:4)WLPLR_3	0	LAGVTALSCWLPLR	b6/0.001,m2:7/0.001	LAGVTALSC(UniMod:4)WLPLR	3	103086_LAGVTALSC(UniMod:4)WLPLR_3	1/O75608	1	b	-1	light
1/Q9UGM3	503.29	665.362	49.8	1438923_y6_1_INLGFSNLK_2	-1	4991.8	103141_INLGFSNLK_2	0	INLGFSNLK	y6/0.002	INLGFSNLK	2	103141_INLGFSNLK_2	1/Q9UGM3	1	y	6	light
1/Q9UGM3	503.29	374.24	49.8	1438919_y3_1_INLGFSNLK_2	-1	497.4	103141_INLGFSNLK_2	0	INLGFSNLK	y3/0.001	INLGFSNLK	2	103141_INLGFSNLK_2	1/Q9UGM3	1	y	3	light
1/Q9UGM3	503.29	892.489	49.8	1438926_y8_1_INLGFSNLK_2	-1	2055.3	103141_INLGFSNLK_2	0	INLGFSNLK	y8/-0.005	INLGFSNLK	2	103141_INLGFSNLK_2	1/Q9UGM3	1	y	8	light
1/Q9UGM3	503.29	461.272	49.8	1438921_y4_1_INLGFSNLK_2	-1	1422.9	103141_INLGFSNLK_2	0	INLGFSNLK	y4/-0.001	INLGFSNLK	2	103141_INLGFSNLK_2	1/Q9UGM3	1	y	4	light
1/Q9UGM3	503.29	608.34	49.8	1438922_y5_1_INLGFSNLK_2	-1	1236	103141_INLGFSNLK_2	0	INLGFSNLK	y5/-0.006	INLGFSNLK	2	103141_INLGFSNLK_2	1/Q9UGM3	1	y	5	light
1/Q9UGM3	503.29	778.446	49.8	1438925_y7_1_INLGFSNLK_2	-1	3048.3	103141_INLGFSNLK_2	0	INLGFSNLK	y7/0.007	INLGFSNLK	2	103141_INLGFSNLK_2	1/Q9UGM3	1	y	7	light
1/Q5EB52	744.727	821.452	108.4	1439018_y6_1_INLLSHDYGDIVAQELLYR_3	-1	4961.8	103148_INLLSHDYGDIVAQELLYR_3	0	INLLSHDYGDIVAQELLYR	y6/-0.001	INLLSHDYGDIVAQELLYR	3	103148_INLLSHDYGDIVAQELLYR_3	1/Q5EB52	1	y	6	light
1/Q5EB52	744.727	1241.62	108.4	1439026_b11_1_INLLSHDYGDIVAQELLYR_3	-1	4620.5	103148_INLLSHDYGDIVAQELLYR_3	0	INLLSHDYGDIVAQELLYR	b11/-0.003	INLLSHDYGDIVAQELLYR	3	103148_INLLSHDYGDIVAQELLYR_3	1/Q5EB52	1	b	11	light
1/Q5EB52	744.727	1128.53	108.4	1439024_b10_1_INLLSHDYGDIVAQELLYR_3	-1	4587.2	103148_INLLSHDYGDIVAQELLYR_3	0	INLLSHDYGDIVAQELLYR	b10/-0.005,m2:11/-0.005	INLLSHDYGDIVAQELLYR	3	103148_INLLSHDYGDIVAQELLYR_3	1/Q5EB52	1	b	10	light
1/Q5EB52	744.727	991.557	108.4	1439022_y8_1_INLLSHDYGDIVAQELLYR_3	-1	4386.1	103148_INLLSHDYGDIVAQELLYR_3	0	INLLSHDYGDIVAQELLYR	y8/-0.002	INLLSHDYGDIVAQELLYR	3	103148_INLLSHDYGDIVAQELLYR_3	1/Q5EB52	1	y	8	light
1/Q5EB52	744.727	693.393	108.4	1439014_y5_1_INLLSHDYGDIVAQELLYR_3	-1	3999	103148_INLLSHDYGDIVAQELLYR_3	0	INLLSHDYGDIVAQELLYR	y5/-0.004	INLLSHDYGDIVAQELLYR	3	103148_INLLSHDYGDIVAQELLYR_3	1/Q5EB52	1	y	5	light
1/Q5EB52	744.727	892.489	108.4	1439021_y7_1_INLLSHDYGDIVAQELLYR_3	-1	10000	103148_INLLSHDYGDIVAQELLYR_3	0	INLLSHDYGDIVAQELLYR	y7/-0.002	INLLSHDYGDIVAQELLYR	3	103148_INLLSHDYGDIVAQELLYR_3	1/Q5EB52	1	y	7	light
1/P06681	551.952	692.365	51.9	157883_ALHQVFEHMLDVSK_3	-1	862.7	10324_ALHQVFEHMLDVSK_3	0	ALHQVFEHMLDVSK	y6/-0.004	ALHQVFEHMLDVSK	3	10324_ALHQVFEHMLDVSK_3	1/P06681	1	y	-1	light
1/P06681	551.952	735.364	51.9	157885_ALHQVFEHMLDVSK_3	-1	757.6	10324_ALHQVFEHMLDVSK_3	0	ALHQVFEHMLDVSK	y12^2/-0.003	ALHQVFEHMLDVSK	3	10324_ALHQVFEHMLDVSK_3	1/P06681	2	y	-1	light
1/P06681	551.952	450.246	51.9	157875_ALHQVFEHMLDVSK_3	-1	674.9	10324_ALHQVFEHMLDVSK_3	0	ALHQVFEHMLDVSK	b4/-0.001	ALHQVFEHMLDVSK	3	10324_ALHQVFEHMLDVSK_3	1/P06681	1	b	-1	light
1/P06681	551.952	481.746	51.9	157876_ALHQVFEHMLDVSK_3	-1	661.5	10324_ALHQVFEHMLDVSK_3	0	ALHQVFEHMLDVSK	b8^2/0.003	ALHQVFEHMLDVSK	3	10324_ALHQVFEHMLDVSK_3	1/P06681	2	b	-1	light
1/P06681	551.952	661.322	51.9	157881_ALHQVFEHMLDVSK_3	-1	766.4	10324_ALHQVFEHMLDVSK_3	0	ALHQVFEHMLDVSK	b11^2/0.002	ALHQVFEHMLDVSK	3	10324_ALHQVFEHMLDVSK_3	1/P06681	2	b	-1	light
1/P06681	551.952	561.324	51.9	157879_ALHQVFEHMLDVSK_3	-1	852	10324_ALHQVFEHMLDVSK_3	0	ALHQVFEHMLDVSK	y5/-0.002	ALHQVFEHMLDVSK	3	10324_ALHQVFEHMLDVSK_3	1/P06681	1	y	-1	light
1/P06681	557.284	481.746	21.4	157894_ALHQVFEHM(UniMod:35)LDVSK_3	-1	398.3	10325_ALHQVFEHM(UniMod:35)LDVSK_3	0	ALHQVFEHMLDVSK	b8^2/0.004	ALHQVFEHM(UniMod:35)LDVSK	3	10325_ALHQVFEHM(UniMod:35)LDVSK_3	1/P06681	2	b	-1	light
1/P06681	557.284	674.832	21.4	157899_ALHQVFEHM(UniMod:35)LDVSK_3	-1	455.7	10325_ALHQVFEHM(UniMod:35)LDVSK_3	0	ALHQVFEHMLDVSK	y11^2/0.011	ALHQVFEHM(UniMod:35)LDVSK	3	10325_ALHQVFEHM(UniMod:35)LDVSK_3	1/P06681	2	y	-1	light
1/P06681	557.284	669.319	21.4	157898_ALHQVFEHM(UniMod:35)LDVSK_3	-1	634.6	10325_ALHQVFEHM(UniMod:35)LDVSK_3	0	ALHQVFEHMLDVSK	b11^2/0.007	ALHQVFEHM(UniMod:35)LDVSK	3	10325_ALHQVFEHM(UniMod:35)LDVSK_3	1/P06681	2	b	-1	light
1/P06681	557.284	549.314	21.4	157895_ALHQVFEHM(UniMod:35)LDVSK_3	-1	512.2	10325_ALHQVFEHM(UniMod:35)LDVSK_3	0	ALHQVFEHMLDVSK	b5/0.007	ALHQVFEHM(UniMod:35)LDVSK	3	10325_ALHQVFEHM(UniMod:35)LDVSK_3	1/P06681	1	b	-1	light
1/P06681	557.284	708.36	21.4	157900_ALHQVFEHM(UniMod:35)LDVSK_3	-1	516.4	10325_ALHQVFEHM(UniMod:35)LDVSK_3	0	ALHQVFEHMLDVSK	y6/-0.011	ALHQVFEHM(UniMod:35)LDVSK	3	10325_ALHQVFEHM(UniMod:35)LDVSK_3	1/P06681	1	y	-1	light
1/P06681	557.284	450.246	21.4	157893_ALHQVFEHM(UniMod:35)LDVSK_3	-1	512	10325_ALHQVFEHM(UniMod:35)LDVSK_3	0	ALHQVFEHMLDVSK	b4/0.003	ALHQVFEHM(UniMod:35)LDVSK	3	10325_ALHQVFEHM(UniMod:35)LDVSK_3	1/P06681	1	b	-1	light
1/P06681	414.216	692.365	52	157918_ALHQVFEHMLDVSK_4	-1	597.3	10326_ALHQVFEHMLDVSK_4	0	ALHQVFEHMLDVSK	y6/0.001	ALHQVFEHMLDVSK	4	10326_ALHQVFEHMLDVSK_4	1/P06681	1	y	-1	light
1/P06681	414.216	561.324	52	157914_ALHQVFEHMLDVSK_4	-1	778.6	10326_ALHQVFEHMLDVSK_4	0	ALHQVFEHMLDVSK	y5/-0.006	ALHQVFEHMLDVSK	4	10326_ALHQVFEHMLDVSK_4	1/P06681	1	y	-1	light
1/P06681	414.216	448.24	52	157907_ALHQVFEHMLDVSK_4	-1	626.2	10326_ALHQVFEHMLDVSK_4	0	ALHQVFEHMLDVSK	y4/0.003	ALHQVFEHMLDVSK	4	10326_ALHQVFEHMLDVSK_4	1/P06681	1	y	-1	light
1/P06681	414.216	481.746	52	157910_ALHQVFEHMLDVSK_4	-1	523.9	10326_ALHQVFEHMLDVSK_4	0	ALHQVFEHMLDVSK	b8^2/0.004	ALHQVFEHMLDVSK	4	10326_ALHQVFEHMLDVSK_4	1/P06681	2	b	-1	light
1/P06681	414.216	450.246	52	157908_ALHQVFEHMLDVSK_4	-1	447.2	10326_ALHQVFEHMLDVSK_4	0	ALHQVFEHMLDVSK	b4/-0.006	ALHQVFEHMLDVSK	4	10326_ALHQVFEHMLDVSK_4	1/P06681	1	b	-1	light
1/P06681	414.216	553.271	52	157913_ALHQVFEHMLDVSK_4	-1	1168.2	10326_ALHQVFEHMLDVSK_4	0	ALHQVFEHMLDVSK	y9^2/-0.001	ALHQVFEHMLDVSK	4	10326_ALHQVFEHMLDVSK_4	1/P06681	2	y	-1	light
1/P00488	640.85	983.487	68.2	1582194_LALETALMYGAK_2	-1	7088.8	103277_LALETALMYGAK_2	0	LALETALMYGAK	y9/0.001	LALETALMYGAK	2	103277_LALETALMYGAK_2	1/P00488	1	y	-1	light
1/P00488	640.85	1096.57	68.2	1582196_LALETALMYGAK_2	-1	5080.5	103277_LALETALMYGAK_2	0	LALETALMYGAK	y10/0.002	LALETALMYGAK	2	103277_LALETALMYGAK_2	1/P00488	1	y	-1	light
1/P00488	640.85	569.275	68.2	1582184_LALETALMYGAK_2	-1	4074.6	103277_LALETALMYGAK_2	0	LALETALMYGAK	y5/-0.002	LALETALMYGAK	2	103277_LALETALMYGAK_2	1/P00488	1	y	-1	light
1/P00488	640.85	438.235	68.2	1582181_LALETALMYGAK_2	-1	4641.9	103277_LALETALMYGAK_2	0	LALETALMYGAK	y4/0.000	LALETALMYGAK	2	103277_LALETALMYGAK_2	1/P00488	1	y	-1	light
1/P00488	640.85	753.396	68.2	1582190_LALETALMYGAK_2	-1	4373.6	103277_LALETALMYGAK_2	0	LALETALMYGAK	y7/-0.001	LALETALMYGAK	2	103277_LALETALMYGAK_2	1/P00488	1	y	-1	light
1/P00488	640.85	854.444	68.2	1582192_LALETALMYGAK_2	-1	10000	103277_LALETALMYGAK_2	0	LALETALMYGAK	y8/-0.001	LALETALMYGAK	2	103277_LALETALMYGAK_2	1/P00488	1	y	-1	light
1/P00488	648.847	870.439	55.1	1582209_LALETALM(UniMod:35)YGAK_2	-1	5514.1	103278_LALETALM(UniMod:35)YGAK_2	0	LALETALMYGAK	y8/-0.005	LALETALM(UniMod:35)YGAK	2	103278_LALETALM(UniMod:35)YGAK_2	1/P00488	1	y	-1	light
1/P00488	648.847	438.235	55.1	1582199_LALETALM(UniMod:35)YGAK_2	-1	3250.5	103278_LALETALM(UniMod:35)YGAK_2	0	LALETALMYGAK	y4/-0.002	LALETALM(UniMod:35)YGAK	2	103278_LALETALM(UniMod:35)YGAK_2	1/P00488	1	y	-1	light
1/P00488	648.847	769.391	55.1	1582207_LALETALM(UniMod:35)YGAK_2	-1	2862.9	103278_LALETALM(UniMod:35)YGAK_2	0	LALETALMYGAK	y7/0.003	LALETALM(UniMod:35)YGAK	2	103278_LALETALM(UniMod:35)YGAK_2	1/P00488	1	y	-1	light
1/P00488	648.847	1112.57	55.1	1582213_LALETALM(UniMod:35)YGAK_2	-1	3548.4	103278_LALETALM(UniMod:35)YGAK_2	0	LALETALMYGAK	y10/-0.010	LALETALM(UniMod:35)YGAK	2	103278_LALETALM(UniMod:35)YGAK_2	1/P00488	1	y	-1	light
1/P00488	648.847	999.482	55.1	1582212_LALETALM(UniMod:35)YGAK_2	-1	4186.9	103278_LALETALM(UniMod:35)YGAK_2	0	LALETALMYGAK	y9/0.002	LALETALM(UniMod:35)YGAK	2	103278_LALETALM(UniMod:35)YGAK_2	1/P00488	1	y	-1	light
1/P00488	648.847	698.354	55.1	1582205_LALETALM(UniMod:35)YGAK_2	-1	2854.8	103278_LALETALM(UniMod:35)YGAK_2	0	LALETALMYGAK	y6/-0.003	LALETALM(UniMod:35)YGAK	2	103278_LALETALM(UniMod:35)YGAK_2	1/P00488	1	y	-1	light
1/Q15102	461.795	738.462	12.9	157988_ALHSLLLR_2	-1	1529.7	10331_ALHSLLLR_2	0	ALHSLLLR	y6/-0.001	ALHSLLLR	2	10331_ALHSLLLR_2	1/Q15102	1	y	-1	light
1/Q15102	461.795	409.219	12.9	157982_ALHSLLLR_2	-1	396.4	10331_ALHSLLLR_2	0	ALHSLLLR	b4/0.004	ALHSLLLR	2	10331_ALHSLLLR_2	1/Q15102	1	b	-1	light
1/Q15102	461.795	369.735	12.9	157980_ALHSLLLR_2	-1	2993.3	10331_ALHSLLLR_2	0	ALHSLLLR	y6^2/0.001	ALHSLLLR	2	10331_ALHSLLLR_2	1/Q15102	2	y	-1	light
1/Q15102	461.795	401.287	12.9	157981_ALHSLLLR_2	-1	369.9	10331_ALHSLLLR_2	0	ALHSLLLR	y3/-0.001	ALHSLLLR	2	10331_ALHSLLLR_2	1/Q15102	1	y	-1	light
1/Q15102	461.795	514.371	12.9	157984_ALHSLLLR_2	-1	905.5	10331_ALHSLLLR_2	0	ALHSLLLR	y4/-0.002	ALHSLLLR	2	10331_ALHSLLLR_2	1/Q15102	1	y	-1	light
1/Q15102	461.795	601.403	12.9	157986_ALHSLLLR_2	-1	4151.5	10331_ALHSLLLR_2	0	ALHSLLLR	y5/0.000	ALHSLLLR	2	10331_ALHSLLLR_2	1/Q15102	1	y	-1	light
1/P52948	809.47	879.468	98.5	1582992_LALLLSQFVGSQSVR_2	-1	5217.5	103332_LALLLSQFVGSQSVR_2	0	LALLLSQFVGSQSVR	y8/-0.003	LALLLSQFVGSQSVR	2	103332_LALLLSQFVGSQSVR_2	1/P52948	1	y	-1	light
1/P52948	809.47	411.297	98.5	1582981_LALLLSQFVGSQSVR_2	-1	4417.1	103332_LALLLSQFVGSQSVR_2	0	LALLLSQFVGSQSVR	b4/-0.002,m2:5/-0.002	LALLLSQFVGSQSVR	2	103332_LALLLSQFVGSQSVR_2	1/P52948	1	b	-1	light
1/P52948	809.47	1207.64	98.5	1583000_LALLLSQFVGSQSVR_2	-1	4946.5	103332_LALLLSQFVGSQSVR_2	0	LALLLSQFVGSQSVR	y11/-0.002	LALLLSQFVGSQSVR	2	103332_LALLLSQFVGSQSVR_2	1/P52948	1	y	-1	light
1/P52948	809.47	1094.56	98.5	1582997_LALLLSQFVGSQSVR_2	-1	10000	103332_LALLLSQFVGSQSVR_2	0	LALLLSQFVGSQSVR	y10/-0.002	LALLLSQFVGSQSVR	2	103332_LALLLSQFVGSQSVR_2	1/P52948	1	y	-1	light
1/P52948	809.47	633.331	98.5	1582986_LALLLSQFVGSQSVR_2	-1	6535.4	103332_LALLLSQFVGSQSVR_2	0	LALLLSQFVGSQSVR	y6/-0.004	LALLLSQFVGSQSVR	2	103332_LALLLSQFVGSQSVR_2	1/P52948	1	y	-1	light
1/P52948	809.47	732.4	98.5	1582988_LALLLSQFVGSQSVR_2	-1	4588.3	103332_LALLLSQFVGSQSVR_2	0	LALLLSQFVGSQSVR	y7/-0.004	LALLLSQFVGSQSVR	2	103332_LALLLSQFVGSQSVR_2	1/P52948	1	y	-1	light
1/P52948	539.982	361.219	98.3	1583003_LALLLSQFVGSQSVR_3	-1	1733.5	103333_LALLLSQFVGSQSVR_3	0	LALLLSQFVGSQSVR	y3/-0.015	LALLLSQFVGSQSVR	3	103333_LALLLSQFVGSQSVR_3	1/P52948	1	y	-1	light
1/P52948	539.982	411.297	98.3	1583005_LALLLSQFVGSQSVR_3	-1	1971.5	103333_LALLLSQFVGSQSVR_3	0	LALLLSQFVGSQSVR	b4/-0.005,m2:5/-0.005	LALLLSQFVGSQSVR	3	103333_LALLLSQFVGSQSVR_3	1/P52948	1	b	-1	light
1/P52948	539.982	576.31	98.3	1583011_LALLLSQFVGSQSVR_3	-1	1020	103333_LALLLSQFVGSQSVR_3	0	LALLLSQFVGSQSVR	y5/-0.014	LALLLSQFVGSQSVR	3	103333_LALLLSQFVGSQSVR_3	1/P52948	1	y	-1	light
1/P52948	539.982	633.331	98.3	1583012_LALLLSQFVGSQSVR_3	-1	10000	103333_LALLLSQFVGSQSVR_3	0	LALLLSQFVGSQSVR	y6/-0.011	LALLLSQFVGSQSVR	3	103333_LALLLSQFVGSQSVR_3	1/P52948	1	y	-1	light
1/P52948	539.982	493.308	98.3	1583008_LALLLSQFVGSQSVR_3	-1	967.1	103333_LALLLSQFVGSQSVR_3	0	LALLLSQFVGSQSVR	b9^2/-0.017	LALLLSQFVGSQSVR	3	103333_LALLLSQFVGSQSVR_3	1/P52948	2	b	-1	light
1/P52948	539.982	732.4	98.3	1583014_LALLLSQFVGSQSVR_3	-1	2222.9	103333_LALLLSQFVGSQSVR_3	0	LALLLSQFVGSQSVR	y7/-0.019	LALLLSQFVGSQSVR	3	103333_LALLLSQFVGSQSVR_3	1/P52948	1	y	-1	light
1/P29144	579.301	876.421	15.5	1443645_y8_1_IPASWTNPSGK_2	-1	3232.3	103473_IPASWTNPSGK_2	0	IPASWTNPSGK	y8/0.001	IPASWTNPSGK	2	103473_IPASWTNPSGK_2	1/P29144	1	y	8	light
1/P29144	579.301	1044.51	15.5	1443647_y10_1_IPASWTNPSGK_2	-1	1402.7	103473_IPASWTNPSGK_2	0	IPASWTNPSGK	y10/0.007	IPASWTNPSGK	2	103473_IPASWTNPSGK_2	1/P29144	1	y	10	light
1/P29144	579.301	522.759	15.5	1443642_y10_2_IPASWTNPSGK_2	-1	2392.7	103473_IPASWTNPSGK_2	0	IPASWTNPSGK	y10^2/-0.000	IPASWTNPSGK	2	103473_IPASWTNPSGK_2	1/P29144	2	y	10	light
1/P29144	579.301	388.219	15.5	1443640_y4_1_IPASWTNPSGK_2	-1	3584	103473_IPASWTNPSGK_2	0	IPASWTNPSGK	y4/0.000	IPASWTNPSGK	2	103473_IPASWTNPSGK_2	1/P29144	1	y	4	light
1/P29144	579.301	603.31	15.5	1443643_y6_1_IPASWTNPSGK_2	-1	1652.6	103473_IPASWTNPSGK_2	0	IPASWTNPSGK	y6/0.000	IPASWTNPSGK	2	103473_IPASWTNPSGK_2	1/P29144	1	y	6	light
1/P29144	579.301	947.458	15.5	1443646_y9_1_IPASWTNPSGK_2	-1	3280.2	103473_IPASWTNPSGK_2	0	IPASWTNPSGK	y9/0.001	IPASWTNPSGK	2	103473_IPASWTNPSGK_2	1/P29144	1	y	9	light
1/P68402	1020.48	398.24	114.8	1586085_LANVQLLDTDGGFVHSDGAISC(UniMod:4)HDMFDFLHLTGGGYAK_4	-1	4114.2	103531_LANVQLLDTDGGFVHSDGAISC(UniMod:4)HDMFDFLHLTGGGYAK_4	0	LANVQLLDTDGGFVHSDGAISCHDMFDFLHLTGGGYAK	b4/-0.001	LANVQLLDTDGGFVHSDGAISC(UniMod:4)HDMFDFLHLTGGGYAK	4	103531_LANVQLLDTDGGFVHSDGAISC(UniMod:4)HDMFDFLHLTGGGYAK_4	1/P68402	1	b	-1	light
1/P68402	1020.48	653.325	114.8	1586091_LANVQLLDTDGGFVHSDGAISC(UniMod:4)HDMFDFLHLTGGGYAK_4	-1	4444.3	103531_LANVQLLDTDGGFVHSDGAISC(UniMod:4)HDMFDFLHLTGGGYAK_4	0	LANVQLLDTDGGFVHSDGAISCHDMFDFLHLTGGGYAK	y7/0.001	LANVQLLDTDGGFVHSDGAISC(UniMod:4)HDMFDFLHLTGGGYAK	4	103531_LANVQLLDTDGGFVHSDGAISC(UniMod:4)HDMFDFLHLTGGGYAK_4	1/P68402	1	y	-1	light
1/P68402	1020.48	495.256	114.8	1586087_LANVQLLDTDGGFVHSDGAISC(UniMod:4)HDMFDFLHLTGGGYAK_4	-1	2185.3	103531_LANVQLLDTDGGFVHSDGAISC(UniMod:4)HDMFDFLHLTGGGYAK_4	0	LANVQLLDTDGGFVHSDGAISCHDMFDFLHLTGGGYAK	y5/-0.007,b20-46^4/-0.007	LANVQLLDTDGGFVHSDGAISC(UniMod:4)HDMFDFLHLTGGGYAK	4	103531_LANVQLLDTDGGFVHSDGAISC(UniMod:4)HDMFDFLHLTGGGYAK_4	1/P68402	1	y	-1	light
1/P68402	1020.48	552.278	114.8	1586089_LANVQLLDTDGGFVHSDGAISC(UniMod:4)HDMFDFLHLTGGGYAK_4	-1	3805.5	103531_LANVQLLDTDGGFVHSDGAISC(UniMod:4)HDMFDFLHLTGGGYAK_4	0	LANVQLLDTDGGFVHSDGAISCHDMFDFLHLTGGGYAK	y6/0.003,y21-91^4/0.016	LANVQLLDTDGGFVHSDGAISC(UniMod:4)HDMFDFLHLTGGGYAK	4	103531_LANVQLLDTDGGFVHSDGAISC(UniMod:4)HDMFDFLHLTGGGYAK_4	1/P68402	1	y	-1	light
1/P68402	1020.48	903.468	114.8	1586095_LANVQLLDTDGGFVHSDGAISC(UniMod:4)HDMFDFLHLTGGGYAK_4	-1	2929.2	103531_LANVQLLDTDGGFVHSDGAISC(UniMod:4)HDMFDFLHLTGGGYAK_4	0	LANVQLLDTDGGFVHSDGAISCHDMFDFLHLTGGGYAK	y9/0.000	LANVQLLDTDGGFVHSDGAISC(UniMod:4)HDMFDFLHLTGGGYAK	4	103531_LANVQLLDTDGGFVHSDGAISC(UniMod:4)HDMFDFLHLTGGGYAK_4	1/P68402	1	y	-1	light
1/P68402	1020.48	766.409	114.8	1586093_LANVQLLDTDGGFVHSDGAISC(UniMod:4)HDMFDFLHLTGGGYAK_4	-1	2700.7	103531_LANVQLLDTDGGFVHSDGAISC(UniMod:4)HDMFDFLHLTGGGYAK_4	0	LANVQLLDTDGGFVHSDGAISCHDMFDFLHLTGGGYAK	y8/0.001	LANVQLLDTDGGFVHSDGAISC(UniMod:4)HDMFDFLHLTGGGYAK	4	103531_LANVQLLDTDGGFVHSDGAISC(UniMod:4)HDMFDFLHLTGGGYAK_4	1/P68402	1	y	-1	light
1/P68402	816.587	452.238	114.3	1586100_LANVQLLDTDGGFVHSDGAISC(UniMod:4)HDMFDFLHLTGGGYAK_5	-1	1179.1	103532_LANVQLLDTDGGFVHSDGAISC(UniMod:4)HDMFDFLHLTGGGYAK_5	0	LANVQLLDTDGGFVHSDGAISCHDMFDFLHLTGGGYAK	y9^2/0.005	LANVQLLDTDGGFVHSDGAISC(UniMod:4)HDMFDFLHLTGGGYAK	5	103532_LANVQLLDTDGGFVHSDGAISC(UniMod:4)HDMFDFLHLTGGGYAK_5	1/P68402	2	y	-1	light
1/P68402	816.587	398.24	114.3	1586099_LANVQLLDTDGGFVHSDGAISC(UniMod:4)HDMFDFLHLTGGGYAK_5	-1	1962	103532_LANVQLLDTDGGFVHSDGAISC(UniMod:4)HDMFDFLHLTGGGYAK_5	0	LANVQLLDTDGGFVHSDGAISCHDMFDFLHLTGGGYAK	b4/-0.002	LANVQLLDTDGGFVHSDGAISC(UniMod:4)HDMFDFLHLTGGGYAK	5	103532_LANVQLLDTDGGFVHSDGAISC(UniMod:4)HDMFDFLHLTGGGYAK_5	1/P68402	1	b	-1	light
1/P68402	816.587	903.468	114.3	1586108_LANVQLLDTDGGFVHSDGAISC(UniMod:4)HDMFDFLHLTGGGYAK_5	-1	2115.3	103532_LANVQLLDTDGGFVHSDGAISC(UniMod:4)HDMFDFLHLTGGGYAK_5	0	LANVQLLDTDGGFVHSDGAISCHDMFDFLHLTGGGYAK	y9/0.001	LANVQLLDTDGGFVHSDGAISC(UniMod:4)HDMFDFLHLTGGGYAK	5	103532_LANVQLLDTDGGFVHSDGAISC(UniMod:4)HDMFDFLHLTGGGYAK_5	1/P68402	1	y	-1	light
1/P68402	816.587	653.325	114.3	1586104_LANVQLLDTDGGFVHSDGAISC(UniMod:4)HDMFDFLHLTGGGYAK_5	-1	3493	103532_LANVQLLDTDGGFVHSDGAISC(UniMod:4)HDMFDFLHLTGGGYAK_5	0	LANVQLLDTDGGFVHSDGAISCHDMFDFLHLTGGGYAK	y7/0.002	LANVQLLDTDGGFVHSDGAISC(UniMod:4)HDMFDFLHLTGGGYAK	5	103532_LANVQLLDTDGGFVHSDGAISC(UniMod:4)HDMFDFLHLTGGGYAK_5	1/P68402	1	y	-1	light
1/P68402	816.587	766.409	114.3	1586105_LANVQLLDTDGGFVHSDGAISC(UniMod:4)HDMFDFLHLTGGGYAK_5	-1	2302.7	103532_LANVQLLDTDGGFVHSDGAISC(UniMod:4)HDMFDFLHLTGGGYAK_5	0	LANVQLLDTDGGFVHSDGAISCHDMFDFLHLTGGGYAK	y8/0.001	LANVQLLDTDGGFVHSDGAISC(UniMod:4)HDMFDFLHLTGGGYAK	5	103532_LANVQLLDTDGGFVHSDGAISC(UniMod:4)HDMFDFLHLTGGGYAK_5	1/P68402	1	y	-1	light
1/P68402	816.587	552.278	114.3	1586102_LANVQLLDTDGGFVHSDGAISC(UniMod:4)HDMFDFLHLTGGGYAK_5	-1	1525.2	103532_LANVQLLDTDGGFVHSDGAISC(UniMod:4)HDMFDFLHLTGGGYAK_5	0	LANVQLLDTDGGFVHSDGAISCHDMFDFLHLTGGGYAK	y6/-0.002,y15-17^3/0.019,y21-91^4/0.011,b26-44^5/0.015	LANVQLLDTDGGFVHSDGAISC(UniMod:4)HDMFDFLHLTGGGYAK	5	103532_LANVQLLDTDGGFVHSDGAISC(UniMod:4)HDMFDFLHLTGGGYAK_5	1/P68402	1	y	-1	light
1/P68402	819.786	526.298	99	1586114_LANVQLLDTDGGFVHSDGAISC(UniMod:4)HDM(UniMod:35)FDFLHLTGGGYAK_5	-1	974.4	103533_LANVQLLDTDGGFVHSDGAISC(UniMod:4)HDM(UniMod:35)FDFLHLTGGGYAK_5	0	LANVQLLDTDGGFVHSDGAISCHDMFDFLHLTGGGYAK	b5/-0.005,m2:6/-0.005	LANVQLLDTDGGFVHSDGAISC(UniMod:4)HDM(UniMod:35)FDFLHLTGGGYAK	5	103533_LANVQLLDTDGGFVHSDGAISC(UniMod:4)HDM(UniMod:35)FDFLHLTGGGYAK_5	1/P68402	1	b	-1	light
1/P68402	819.786	766.409	99	1586119_LANVQLLDTDGGFVHSDGAISC(UniMod:4)HDM(UniMod:35)FDFLHLTGGGYAK_5	-1	2282	103533_LANVQLLDTDGGFVHSDGAISC(UniMod:4)HDM(UniMod:35)FDFLHLTGGGYAK_5	0	LANVQLLDTDGGFVHSDGAISCHDMFDFLHLTGGGYAK	y8/-0.006	LANVQLLDTDGGFVHSDGAISC(UniMod:4)HDM(UniMod:35)FDFLHLTGGGYAK	5	103533_LANVQLLDTDGGFVHSDGAISC(UniMod:4)HDM(UniMod:35)FDFLHLTGGGYAK_5	1/P68402	1	y	-1	light
1/P68402	819.786	552.278	99	1586115_LANVQLLDTDGGFVHSDGAISC(UniMod:4)HDM(UniMod:35)FDFLHLTGGGYAK_5	-1	1297.3	103533_LANVQLLDTDGGFVHSDGAISC(UniMod:4)HDM(UniMod:35)FDFLHLTGGGYAK_5	0	LANVQLLDTDGGFVHSDGAISCHDMFDFLHLTGGGYAK	y6/0.011	LANVQLLDTDGGFVHSDGAISC(UniMod:4)HDM(UniMod:35)FDFLHLTGGGYAK	5	103533_LANVQLLDTDGGFVHSDGAISC(UniMod:4)HDM(UniMod:35)FDFLHLTGGGYAK_5	1/P68402	1	y	-1	light
1/P68402	819.786	398.24	99	1586110_LANVQLLDTDGGFVHSDGAISC(UniMod:4)HDM(UniMod:35)FDFLHLTGGGYAK_5	-1	2876.2	103533_LANVQLLDTDGGFVHSDGAISC(UniMod:4)HDM(UniMod:35)FDFLHLTGGGYAK_5	0	LANVQLLDTDGGFVHSDGAISCHDMFDFLHLTGGGYAK	b4/0.001	LANVQLLDTDGGFVHSDGAISC(UniMod:4)HDM(UniMod:35)FDFLHLTGGGYAK	5	103533_LANVQLLDTDGGFVHSDGAISC(UniMod:4)HDM(UniMod:35)FDFLHLTGGGYAK_5	1/P68402	1	b	-1	light
1/P68402	819.786	653.325	99	1586118_LANVQLLDTDGGFVHSDGAISC(UniMod:4)HDM(UniMod:35)FDFLHLTGGGYAK_5	-1	2607.1	103533_LANVQLLDTDGGFVHSDGAISC(UniMod:4)HDM(UniMod:35)FDFLHLTGGGYAK_5	0	LANVQLLDTDGGFVHSDGAISCHDMFDFLHLTGGGYAK	[y7/0.012]	LANVQLLDTDGGFVHSDGAISC(UniMod:4)HDM(UniMod:35)FDFLHLTGGGYAK	5	103533_LANVQLLDTDGGFVHSDGAISC(UniMod:4)HDM(UniMod:35)FDFLHLTGGGYAK_5	1/P68402	1	y	-1	light
1/P68402	819.786	903.468	99	1586121_LANVQLLDTDGGFVHSDGAISC(UniMod:4)HDM(UniMod:35)FDFLHLTGGGYAK_5	-1	1373.9	103533_LANVQLLDTDGGFVHSDGAISC(UniMod:4)HDM(UniMod:35)FDFLHLTGGGYAK_5	0	LANVQLLDTDGGFVHSDGAISCHDMFDFLHLTGGGYAK	y9/0.001	LANVQLLDTDGGFVHSDGAISC(UniMod:4)HDM(UniMod:35)FDFLHLTGGGYAK	5	103533_LANVQLLDTDGGFVHSDGAISC(UniMod:4)HDM(UniMod:35)FDFLHLTGGGYAK_5	1/P68402	1	y	-1	light
1/P0CW18	637.403	624.383	72.1	1586158_LAPALALPAPALR_2	-1	10000	103536_LAPALALPAPALR_2	0	LAPALALPAPALR	y6/0.008	LAPALALPAPALR	2	103536_LAPALALPAPALR_2	1/P0CW18	1	y	-1	light
1/P0CW18	637.403	808.504	72.1	1586162_LAPALALPAPALR_2	-1	1518.9	103536_LAPALALPAPALR_2	0	LAPALALPAPALR	y8/0.012	LAPALALPAPALR	2	103536_LAPALALPAPALR_2	1/P0CW18	1	y	-1	light
1/P0CW18	637.403	466.302	72.1	1586153_LAPALALPAPALR_2	-1	2394.4	103536_LAPALALPAPALR_2	0	LAPALALPAPALR	b5/-0.005,m4:8/-0.005	LAPALALPAPALR	2	103536_LAPALALPAPALR_2	1/P0CW18	1	b	-1	light
1/P0CW18	637.403	545.343	72.1	1586156_LAPALALPAPALR_2	-1	3151.2	103536_LAPALALPAPALR_2	0	LAPALALPAPALR	y11^2/-0.007	LAPALALPAPALR	2	103536_LAPALALPAPALR_2	1/P0CW18	2	y	-1	light
1/P0CW18	637.403	737.467	72.1	1586161_LAPALALPAPALR_2	-1	2721.6	103536_LAPALALPAPALR_2	0	LAPALALPAPALR	y7/-0.010	LAPALALPAPALR	2	103536_LAPALALPAPALR_2	1/P0CW18	1	y	-1	light
1/P0CW18	637.403	353.218	72.1	1586151_LAPALALPAPALR_2	-1	3076.3	103536_LAPALALPAPALR_2	0	LAPALALPAPALR	b4/-0.003,m3:6/-0.003	LAPALALPAPALR	2	103536_LAPALALPAPALR_2	1/P0CW18	1	b	-1	light
1/O75608	458.261	618.309	2.6	158473_ALIDQEVK_2	-1	4641.6	10358_ALIDQEVK_2	0	ALIDQEVK	y5/-0.002	ALIDQEVK	2	10358_ALIDQEVK_2	1/O75608	1	y	-1	light
1/O75608	458.261	366.2	2.6	158468_ALIDQEVK_2	-1	772.3	10358_ALIDQEVK_2	0	ALIDQEVK	y6^2/0.000	ALIDQEVK	2	10358_ALIDQEVK_2	1/O75608	2	y	-1	light
1/O75608	458.261	422.742	2.6	158471_ALIDQEVK_2	-1	333.8	10358_ALIDQEVK_2	0	ALIDQEVK	y7^2/0.000	ALIDQEVK	2	10358_ALIDQEVK_2	1/O75608	2	y	-1	light
1/O75608	458.261	503.282	2.6	158472_ALIDQEVK_2	-1	1005.8	10358_ALIDQEVK_2	0	ALIDQEVK	y4/-0.001	ALIDQEVK	2	10358_ALIDQEVK_2	1/O75608	1	y	-1	light
1/O75608	458.261	375.224	2.6	158469_ALIDQEVK_2	-1	375.4	10358_ALIDQEVK_2	0	ALIDQEVK	y3/0.000	ALIDQEVK	2	10358_ALIDQEVK_2	1/O75608	1	y	-1	light
1/O75608	458.261	731.393	2.6	158475_ALIDQEVK_2	-1	10000	10358_ALIDQEVK_2	0	ALIDQEVK	y6/-0.002	ALIDQEVK	2	10358_ALIDQEVK_2	1/O75608	1	y	-1	light
1/P02787	989.26	454.23	136.5	10335_y4_1_AIAANEADAVTLDAGLVYDAYLAPNNLKPVVAEFYGSK_4	-1	3629.4	1036_AIAANEADAVTLDAGLVYDAYLAPNNLKPVVAEFYGSK_4	0	AIAANEADAVTLDAGLVYDAYLAPNNLKPVVAEFYGSK	y4/0.006	AIAANEADAVTLDAGLVYDAYLAPNNLKPVVAEFYGSK	4	1036_AIAANEADAVTLDAGLVYDAYLAPNNLKPVVAEFYGSK_4	1/P02787	1	y	4	light
1/P02787	989.26	1662.88	136.5	10351_y15_1_AIAANEADAVTLDAGLVYDAYLAPNNLKPVVAEFYGSK_4	-1	4133.7	1036_AIAANEADAVTLDAGLVYDAYLAPNNLKPVVAEFYGSK_4	0	AIAANEADAVTLDAGLVYDAYLAPNNLKPVVAEFYGSK	y15/-0.015	AIAANEADAVTLDAGLVYDAYLAPNNLKPVVAEFYGSK	4	1036_AIAANEADAVTLDAGLVYDAYLAPNNLKPVVAEFYGSK_4	1/P02787	1	y	15	light
1/P02787	989.26	692.341	136.5	10338_b15_2_AIAANEADAVTLDAGLVYDAYLAPNNLKPVVAEFYGSK_4	-1	3281.5	1036_AIAANEADAVTLDAGLVYDAYLAPNNLKPVVAEFYGSK_4	0	AIAANEADAVTLDAGLVYDAYLAPNNLKPVVAEFYGSK	b15^2/-0.005	AIAANEADAVTLDAGLVYDAYLAPNNLKPVVAEFYGSK	4	1036_AIAANEADAVTLDAGLVYDAYLAPNNLKPVVAEFYGSK_4	1/P02787	2	b	15	light
1/P02787	989.26	926.458	136.5	10345_b10_1_AIAANEADAVTLDAGLVYDAYLAPNNLKPVVAEFYGSK_4	-1	4140.6	1036_AIAANEADAVTLDAGLVYDAYLAPNNLKPVVAEFYGSK_4	0	AIAANEADAVTLDAGLVYDAYLAPNNLKPVVAEFYGSK	b10/-0.004,b36-18^4/-0.019	AIAANEADAVTLDAGLVYDAYLAPNNLKPVVAEFYGSK	4	1036_AIAANEADAVTLDAGLVYDAYLAPNNLKPVVAEFYGSK_4	1/P02787	1	b	10	light
1/P02787	989.26	867.465	136.5	10342_y16_2_AIAANEADAVTLDAGLVYDAYLAPNNLKPVVAEFYGSK_4	-1	4326.1	1036_AIAANEADAVTLDAGLVYDAYLAPNNLKPVVAEFYGSK_4	0	AIAANEADAVTLDAGLVYDAYLAPNNLKPVVAEFYGSK	y16^2/0.001	AIAANEADAVTLDAGLVYDAYLAPNNLKPVVAEFYGSK	4	1036_AIAANEADAVTLDAGLVYDAYLAPNNLKPVVAEFYGSK_4	1/P02787	2	y	16	light
1/P02787	989.26	1096.57	136.5	10348_y10_1_AIAANEADAVTLDAGLVYDAYLAPNNLKPVVAEFYGSK_4	-1	10000	1036_AIAANEADAVTLDAGLVYDAYLAPNNLKPVVAEFYGSK_4	0	AIAANEADAVTLDAGLVYDAYLAPNNLKPVVAEFYGSK	y10/0.006	AIAANEADAVTLDAGLVYDAYLAPNNLKPVVAEFYGSK	4	1036_AIAANEADAVTLDAGLVYDAYLAPNNLKPVVAEFYGSK_4	1/P02787	1	y	10	light
1/P54577	427.268	350.219	27.5	100692_b3_1_HVLFPLK_2	-1	3355.3	10360_HVLFPLK_2	0	HVLFPLK	b3/0.008,y6-17^2/0.001	HVLFPLK	2	10360_HVLFPLK_2	1/P54577	1	b	3	light
1/P54577	427.268	357.25	27.5	100693_y3_1_HVLFPLK_2	-1	5657.9	10360_HVLFPLK_2	0	HVLFPLK	y3/0.001	HVLFPLK	2	10360_HVLFPLK_2	1/P54577	1	y	3	light
1/P54577	427.268	716.471	27.5	100699_y6_1_HVLFPLK_2	-1	2302.6	10360_HVLFPLK_2	0	HVLFPLK	y6/0.007	HVLFPLK	2	10360_HVLFPLK_2	1/P54577	1	y	6	light
1/P54577	427.268	617.402	27.5	100697_y5_1_HVLFPLK_2	-1	3179.8	10360_HVLFPLK_2	0	HVLFPLK	y5/0.006	HVLFPLK	2	10360_HVLFPLK_2	1/P54577	1	y	5	light
1/P54577	427.268	504.318	27.5	100695_y4_1_HVLFPLK_2	-1	1535.1	10360_HVLFPLK_2	0	HVLFPLK	y4/0.009	HVLFPLK	2	10360_HVLFPLK_2	1/P54577	1	y	4	light
1/P54577	427.268	497.287	27.5	100694_b4_1_HVLFPLK_2	-1	6819	10360_HVLFPLK_2	0	HVLFPLK	b4/-0.002	HVLFPLK	2	10360_HVLFPLK_2	1/P54577	1	b	4	light
1/O95372	485.755	393.694	-12.4	158563_ALIEHEMK_2	-1	626	10366_ALIEHEMK_2	0	ALIEHEMK	y6^2/0.003	ALIEHEMK	2	10366_ALIEHEMK_2	1/O95372	2	y	-1	light
1/O95372	485.755	544.255	-12.4	158566_ALIEHEMK_2	-1	455.9	10366_ALIEHEMK_2	0	ALIEHEMK	y4/0.008	ALIEHEMK	2	10366_ALIEHEMK_2	1/O95372	1	y	-1	light
1/O95372	485.755	450.236	-12.4	158565_ALIEHEMK_2	-1	349.6	10366_ALIEHEMK_2	0	ALIEHEMK	y7^2/0.003	ALIEHEMK	2	10366_ALIEHEMK_2	1/O95372	2	y	-1	light
1/O95372	485.755	786.381	-12.4	158570_ALIEHEMK_2	-1	1124.5	10366_ALIEHEMK_2	0	ALIEHEMK	[y6/-0.009]	ALIEHEMK	2	10366_ALIEHEMK_2	1/O95372	1	y	-1	light
1/O95372	485.755	673.297	-12.4	158568_ALIEHEMK_2	-1	998.9	10366_ALIEHEMK_2	0	ALIEHEMK	y5/-0.007	ALIEHEMK	2	10366_ALIEHEMK_2	1/O95372	1	y	-1	light
1/O95372	485.755	693.357	-12.4	158569_ALIEHEMK_2	-1	309.1	10366_ALIEHEMK_2	0	ALIEHEMK	b6/-0.003	ALIEHEMK	2	10366_ALIEHEMK_2	1/O95372	1	b	-1	light
1/O75884	517.279	619.323	41.8	1446301_y5_1_IPGFQC(UniMod:4)LAK_2	-1	1487.3	103660_IPGFQC(UniMod:4)LAK_2	0	IPGFQCLAK	y5/0.007	IPGFQC(UniMod:4)LAK	2	103660_IPGFQC(UniMod:4)LAK_2	1/O75884	1	y	5	light
1/O75884	517.279	460.737	41.8	1446299_y8_2_IPGFQC(UniMod:4)LAK_2	-1	3508.8	103660_IPGFQC(UniMod:4)LAK_2	0	IPGFQCLAK	y8^2/0.004	IPGFQC(UniMod:4)LAK	2	103660_IPGFQC(UniMod:4)LAK_2	1/O75884	2	y	8	light
1/O75884	517.279	920.466	41.8	1446305_y8_1_IPGFQC(UniMod:4)LAK_2	-1	5490.2	103660_IPGFQC(UniMod:4)LAK_2	0	IPGFQCLAK	y8/0.016	IPGFQC(UniMod:4)LAK	2	103660_IPGFQC(UniMod:4)LAK_2	1/O75884	1	y	8	light
1/O75884	517.279	766.392	41.8	1446303_y6_1_IPGFQC(UniMod:4)LAK_2	-1	2033.3	103660_IPGFQC(UniMod:4)LAK_2	0	IPGFQCLAK	y6/0.013	IPGFQC(UniMod:4)LAK	2	103660_IPGFQC(UniMod:4)LAK_2	1/O75884	1	y	6	light
1/O75884	517.279	823.413	41.8	1446304_y7_1_IPGFQC(UniMod:4)LAK_2	-1	10000	103660_IPGFQC(UniMod:4)LAK_2	0	IPGFQCLAK	y7/0.014	IPGFQC(UniMod:4)LAK	2	103660_IPGFQC(UniMod:4)LAK_2	1/O75884	1	y	7	light
1/O75884	517.279	491.265	41.8	1446300_y4_1_IPGFQC(UniMod:4)LAK_2	-1	1734.7	103660_IPGFQC(UniMod:4)LAK_2	0	IPGFQCLAK	y4/0.002	IPGFQC(UniMod:4)LAK	2	103660_IPGFQC(UniMod:4)LAK_2	1/O75884	1	y	4	light
1/P36776	700.84	483.202	38.4	100759_b4_1_HVMDVVDEELSK_2	-1	1855.4	10367_HVMDVVDEELSK_2	0	HVMDVVDEELSK	[b4/0.017]	HVMDVVDEELSK	2	10367_HVMDVVDEELSK_2	1/P36776	1	b	4	light
1/P36776	700.84	1263.61	38.4	100766_y11_1_HVMDVVDEELSK_2	-1	2024.1	10367_HVMDVVDEELSK_2	0	HVMDVVDEELSK	y11/-0.010	HVMDVVDEELSK	2	10367_HVMDVVDEELSK_2	1/P36776	1	y	11	light
1/P36776	700.84	1033.5	38.4	100764_y9_1_HVMDVVDEELSK_2	-1	1855.4	10367_HVMDVVDEELSK_2	0	HVMDVVDEELSK	y9/-0.011	HVMDVVDEELSK	2	10367_HVMDVVDEELSK_2	1/P36776	1	y	9	light
1/P36776	700.84	476.271	38.4	100757_y4_1_HVMDVVDEELSK_2	-1	2192.8	10367_HVMDVVDEELSK_2	0	HVMDVVDEELSK	y4/-0.015	HVMDVVDEELSK	2	10367_HVMDVVDEELSK_2	1/P36776	1	y	4	light
1/P36776	700.84	582.27	38.4	100760_b5_1_HVMDVVDEELSK_2	-1	1855.4	10367_HVMDVVDEELSK_2	0	HVMDVVDEELSK	b5/-0.006	HVMDVVDEELSK	2	10367_HVMDVVDEELSK_2	1/P36776	1	b	5	light
1/P36776	700.84	1164.55	38.4	100765_y10_1_HVMDVVDEELSK_2	-1	7614.5	10367_HVMDVVDEELSK_2	0	HVMDVVDEELSK	y10/-0.011	HVMDVVDEELSK	2	10367_HVMDVVDEELSK_2	1/P36776	1	y	10	light
1/P50897	701.421	381.25	103.5	1446482_b4_1_IPGIYVLSLEIGK_2	-1	2612.2	103672_IPGIYVLSLEIGK_2	0	IPGIYVLSLEIGK	b4/-0.001	IPGIYVLSLEIGK	2	103672_IPGIYVLSLEIGK_2	1/P50897	1	b	4	light
1/P50897	701.421	646.377	103.5	1446489_y6_1_IPGIYVLSLEIGK_2	-1	3259.4	103672_IPGIYVLSLEIGK_2	0	IPGIYVLSLEIGK	y6/-0.004	IPGIYVLSLEIGK	2	103672_IPGIYVLSLEIGK_2	1/P50897	1	y	6	light
1/P50897	701.421	1021.59	103.5	1446494_y9_1_IPGIYVLSLEIGK_2	-1	5683.2	103672_IPGIYVLSLEIGK_2	0	IPGIYVLSLEIGK	y9/-0.006	IPGIYVLSLEIGK	2	103672_IPGIYVLSLEIGK_2	1/P50897	1	y	9	light
1/P50897	701.421	858.529	103.5	1446492_y8_1_IPGIYVLSLEIGK_2	-1	2936.5	103672_IPGIYVLSLEIGK_2	0	IPGIYVLSLEIGK	y8/-0.009	IPGIYVLSLEIGK	2	103672_IPGIYVLSLEIGK_2	1/P50897	1	y	8	light
1/P50897	701.421	759.461	103.5	1446490_y7_1_IPGIYVLSLEIGK_2	-1	4051.6	103672_IPGIYVLSLEIGK_2	0	IPGIYVLSLEIGK	y7/-0.004	IPGIYVLSLEIGK	2	103672_IPGIYVLSLEIGK_2	1/P50897	1	y	7	light
1/P50897	701.421	644.879	103.5	1446487_y12_2_IPGIYVLSLEIGK_2	-1	2626.2	103672_IPGIYVLSLEIGK_2	0	IPGIYVLSLEIGK	y12^2/-0.003	IPGIYVLSLEIGK	2	103672_IPGIYVLSLEIGK_2	1/P50897	2	y	12	light
1/P50897	467.95	559.345	106.4	1446507_y5_1_IPGIYVLSLEIGK_3	-1	4150.9	103673_IPGIYVLSLEIGK_3	0	IPGIYVLSLEIGK	y5/0.012	IPGIYVLSLEIGK	3	103673_IPGIYVLSLEIGK_3	1/P50897	1	y	5	light
1/P50897	467.95	446.261	106.4	1446505_y4_1_IPGIYVLSLEIGK_3	-1	3708	103673_IPGIYVLSLEIGK_3	0	IPGIYVLSLEIGK	y4/-0.003	IPGIYVLSLEIGK	3	103673_IPGIYVLSLEIGK_3	1/P50897	1	y	4	light
1/P50897	467.95	646.377	106.4	1446508_y6_1_IPGIYVLSLEIGK_3	-1	10000	103673_IPGIYVLSLEIGK_3	0	IPGIYVLSLEIGK	y6/0.007	IPGIYVLSLEIGK	3	103673_IPGIYVLSLEIGK_3	1/P50897	1	y	6	light
1/P50897	467.95	544.313	106.4	1446506_b5_1_IPGIYVLSLEIGK_3	-1	4342	103673_IPGIYVLSLEIGK_3	0	IPGIYVLSLEIGK	b5/0.002	IPGIYVLSLEIGK	3	103673_IPGIYVLSLEIGK_3	1/P50897	1	b	5	light
1/P50897	467.95	759.461	106.4	1446509_y7_1_IPGIYVLSLEIGK_3	-1	3396.2	103673_IPGIYVLSLEIGK_3	0	IPGIYVLSLEIGK	y7/-0.013	IPGIYVLSLEIGK	3	103673_IPGIYVLSLEIGK_3	1/P50897	1	y	7	light
1/P50897	467.95	380.234	106.4	1446502_y7_2_IPGIYVLSLEIGK_3	-1	1988.3	103673_IPGIYVLSLEIGK_3	0	IPGIYVLSLEIGK	y7^2/-0.000	IPGIYVLSLEIGK	3	103673_IPGIYVLSLEIGK_3	1/P50897	2	y	7	light
1/P49327	1096.61	1377.74	91.1	1446566_y12_1_IPGLLSPHPLLQLSYTATDR_2	-1	4194.9	103676_IPGLLSPHPLLQLSYTATDR_2	0	IPGLLSPHPLLQLSYTATDR	y12/-0.017	IPGLLSPHPLLQLSYTATDR	2	103676_IPGLLSPHPLLQLSYTATDR_2	1/P49327	1	y	12	light
1/P49327	1096.61	1040.07	91.1	1446563_y19_2_IPGLLSPHPLLQLSYTATDR_2	-1	1725.9	103676_IPGLLSPHPLLQLSYTATDR_2	0	IPGLLSPHPLLQLSYTATDR	y19^2/0.013	IPGLLSPHPLLQLSYTATDR	2	103676_IPGLLSPHPLLQLSYTATDR_2	1/P49327	2	y	19	light
1/P49327	1096.61	381.25	91.1	1446549_b4_1_IPGLLSPHPLLQLSYTATDR_2	-1	2736.2	103676_IPGLLSPHPLLQLSYTATDR_2	0	IPGLLSPHPLLQLSYTATDR	b4/-0.005,m2:5/-0.005	IPGLLSPHPLLQLSYTATDR	2	103676_IPGLLSPHPLLQLSYTATDR_2	1/P49327	1	b	4	light
1/P49327	1096.61	1611.85	91.1	1446568_y14_1_IPGLLSPHPLLQLSYTATDR_2	-1	2875.5	103676_IPGLLSPHPLLQLSYTATDR_2	0	IPGLLSPHPLLQLSYTATDR	y14/-0.018	IPGLLSPHPLLQLSYTATDR	2	103676_IPGLLSPHPLLQLSYTATDR_2	1/P49327	1	y	14	light
1/P49327	1096.61	1167.6	91.1	1446565_y10_1_IPGLLSPHPLLQLSYTATDR_2	-1	1311.7	103676_IPGLLSPHPLLQLSYTATDR_2	0	IPGLLSPHPLLQLSYTATDR	y10/0.010	IPGLLSPHPLLQLSYTATDR	2	103676_IPGLLSPHPLLQLSYTATDR_2	1/P49327	1	y	10	light
1/P49327	1096.61	815.472	91.1	1446557_b15_2_IPGLLSPHPLLQLSYTATDR_2	-1	1440.1	103676_IPGLLSPHPLLQLSYTATDR_2	0	IPGLLSPHPLLQLSYTATDR	b15^2/-0.011,m9:15/-0.005	IPGLLSPHPLLQLSYTATDR	2	103676_IPGLLSPHPLLQLSYTATDR_2	1/P49327	2	b	15	light
1/P49327	731.407	926.458	90.8	1446591_y8_1_IPGLLSPHPLLQLSYTATDR_3	-1	2946.5	103677_IPGLLSPHPLLQLSYTATDR_3	0	IPGLLSPHPLLQLSYTATDR	y8/-0.001	IPGLLSPHPLLQLSYTATDR	3	103677_IPGLLSPHPLLQLSYTATDR_3	1/P49327	1	y	8	light
1/P49327	731.407	1377.74	90.8	1446602_y12_1_IPGLLSPHPLLQLSYTATDR_3	-1	3677.3	103677_IPGLLSPHPLLQLSYTATDR_3	0	IPGLLSPHPLLQLSYTATDR	y12/-0.000	IPGLLSPHPLLQLSYTATDR	3	103677_IPGLLSPHPLLQLSYTATDR_3	1/P49327	1	y	12	light
1/P49327	731.407	813.374	90.8	1446586_y7_1_IPGLLSPHPLLQLSYTATDR_3	-1	4759.7	103677_IPGLLSPHPLLQLSYTATDR_3	0	IPGLLSPHPLLQLSYTATDR	y7/0.001	IPGLLSPHPLLQLSYTATDR	3	103677_IPGLLSPHPLLQLSYTATDR_3	1/P49327	1	y	7	light
1/P49327	731.407	1054.52	90.8	1446597_y9_1_IPGLLSPHPLLQLSYTATDR_3	-1	2611.3	103677_IPGLLSPHPLLQLSYTATDR_3	0	IPGLLSPHPLLQLSYTATDR	y9/0.002	IPGLLSPHPLLQLSYTATDR	3	103677_IPGLLSPHPLLQLSYTATDR_3	1/P49327	1	y	9	light
1/P49327	731.407	1167.6	90.8	1446599_y10_1_IPGLLSPHPLLQLSYTATDR_3	-1	2539.2	103677_IPGLLSPHPLLQLSYTATDR_3	0	IPGLLSPHPLLQLSYTATDR	y10/0.001	IPGLLSPHPLLQLSYTATDR	3	103677_IPGLLSPHPLLQLSYTATDR_3	1/P49327	1	y	10	light
1/P49327	731.407	991.539	90.8	1446593_y18_2_IPGLLSPHPLLQLSYTATDR_3	-1	2403	103677_IPGLLSPHPLLQLSYTATDR_3	0	IPGLLSPHPLLQLSYTATDR	y18^2/0.001,b19-36^2/-0.001,m10:18/-0.006	IPGLLSPHPLLQLSYTATDR	3	103677_IPGLLSPHPLLQLSYTATDR_3	1/P49327	2	y	18	light
1/P49327	548.807	563.278	90.9	1446613_y5_1_IPGLLSPHPLLQLSYTATDR_4	-1	10000	103678_IPGLLSPHPLLQLSYTATDR_4	0	IPGLLSPHPLLQLSYTATDR	y5/-0.004	IPGLLSPHPLLQLSYTATDR	4	103678_IPGLLSPHPLLQLSYTATDR_4	1/P49327	1	y	5	light
1/P49327	548.807	462.231	90.9	1446610_y4_1_IPGLLSPHPLLQLSYTATDR_4	-1	9946.4	103678_IPGLLSPHPLLQLSYTATDR_4	0	IPGLLSPHPLLQLSYTATDR	y4/-0.002	IPGLLSPHPLLQLSYTATDR	4	103678_IPGLLSPHPLLQLSYTATDR_4	1/P49327	1	y	4	light
1/P49327	548.807	815.472	90.9	1446622_b15_2_IPGLLSPHPLLQLSYTATDR_4	-1	3036.8	103678_IPGLLSPHPLLQLSYTATDR_4	0	IPGLLSPHPLLQLSYTATDR	b15^2/-0.005,b8/-0.011,m3:10/-0.011	IPGLLSPHPLLQLSYTATDR	4	103678_IPGLLSPHPLLQLSYTATDR_4	1/P49327	2	b	15	light
1/P49327	548.807	391.194	90.9	1446607_y3_1_IPGLLSPHPLLQLSYTATDR_4	-1	5260.8	103678_IPGLLSPHPLLQLSYTATDR_4	0	IPGLLSPHPLLQLSYTATDR	y3/0.002	IPGLLSPHPLLQLSYTATDR	4	103678_IPGLLSPHPLLQLSYTATDR_4	1/P49327	1	y	3	light
1/P49327	548.807	726.342	90.9	1446619_y6_1_IPGLLSPHPLLQLSYTATDR_4	-1	6683.8	103678_IPGLLSPHPLLQLSYTATDR_4	0	IPGLLSPHPLLQLSYTATDR	y6/0.001	IPGLLSPHPLLQLSYTATDR	4	103678_IPGLLSPHPLLQLSYTATDR_4	1/P49327	1	y	6	light
1/P49327	548.807	633.882	90.9	1446616_b12_2_IPGLLSPHPLLQLSYTATDR_4	-1	6021.3	103678_IPGLLSPHPLLQLSYTATDR_4	0	IPGLLSPHPLLQLSYTATDR	b12^2/-0.006,m2:13^2/-0.006	IPGLLSPHPLLQLSYTATDR	4	103678_IPGLLSPHPLLQLSYTATDR_4	1/P49327	2	b	12	light
1/P02787	791.609	756.352	136.5	10356_b8_1_AIAANEADAVTLDAGLVYDAYLAPNNLKPVVAEFYGSK_5	-1	2657.1	1037_AIAANEADAVTLDAGLVYDAYLAPNNLKPVVAEFYGSK_5	0	AIAANEADAVTLDAGLVYDAYLAPNNLKPVVAEFYGSK	b8/0.002,m2:9/0.002	AIAANEADAVTLDAGLVYDAYLAPNNLKPVVAEFYGSK	5	1037_AIAANEADAVTLDAGLVYDAYLAPNNLKPVVAEFYGSK_5	1/P02787	1	b	8	light
1/P02787	791.609	454.23	136.5	10353_y4_1_AIAANEADAVTLDAGLVYDAYLAPNNLKPVVAEFYGSK_5	-1	3427.4	1037_AIAANEADAVTLDAGLVYDAYLAPNNLKPVVAEFYGSK_5	0	AIAANEADAVTLDAGLVYDAYLAPNNLKPVVAEFYGSK	y4/-0.006	AIAANEADAVTLDAGLVYDAYLAPNNLKPVVAEFYGSK	5	1037_AIAANEADAVTLDAGLVYDAYLAPNNLKPVVAEFYGSK_5	1/P02787	1	y	4	light
1/P02787	791.609	831.946	136.5	10358_y15_2_AIAANEADAVTLDAGLVYDAYLAPNNLKPVVAEFYGSK_5	-1	4227.9	1037_AIAANEADAVTLDAGLVYDAYLAPNNLKPVVAEFYGSK_5	0	AIAANEADAVTLDAGLVYDAYLAPNNLKPVVAEFYGSK	y15^2/-0.003	AIAANEADAVTLDAGLVYDAYLAPNNLKPVVAEFYGSK	5	1037_AIAANEADAVTLDAGLVYDAYLAPNNLKPVVAEFYGSK_5	1/P02787	2	y	15	light
1/P02787	791.609	867.465	136.5	10359_y16_2_AIAANEADAVTLDAGLVYDAYLAPNNLKPVVAEFYGSK_5	-1	6905.2	1037_AIAANEADAVTLDAGLVYDAYLAPNNLKPVVAEFYGSK_5	0	AIAANEADAVTLDAGLVYDAYLAPNNLKPVVAEFYGSK	y16^2/-0.003	AIAANEADAVTLDAGLVYDAYLAPNNLKPVVAEFYGSK	5	1037_AIAANEADAVTLDAGLVYDAYLAPNNLKPVVAEFYGSK_5	1/P02787	2	y	16	light
1/P02787	791.609	570.288	136.5	10354_b6_1_AIAANEADAVTLDAGLVYDAYLAPNNLKPVVAEFYGSK_5	-1	2841.4	1037_AIAANEADAVTLDAGLVYDAYLAPNNLKPVVAEFYGSK_5	0	AIAANEADAVTLDAGLVYDAYLAPNNLKPVVAEFYGSK	b6/0.008	AIAANEADAVTLDAGLVYDAYLAPNNLKPVVAEFYGSK	5	1037_AIAANEADAVTLDAGLVYDAYLAPNNLKPVVAEFYGSK_5	1/P02787	1	b	6	light
1/P02787	791.609	900.446	136.5	10360_y8_1_AIAANEADAVTLDAGLVYDAYLAPNNLKPVVAEFYGSK_5	-1	2546.2	1037_AIAANEADAVTLDAGLVYDAYLAPNNLKPVVAEFYGSK_5	0	AIAANEADAVTLDAGLVYDAYLAPNNLKPVVAEFYGSK	y8/-0.000	AIAANEADAVTLDAGLVYDAYLAPNNLKPVVAEFYGSK	5	1037_AIAANEADAVTLDAGLVYDAYLAPNNLKPVVAEFYGSK_5	1/P02787	1	y	8	light
1/P36776	617.863	407.265	70.1	1589768_LAQPYVGVFLK_2	-1	1723.7	103777_LAQPYVGVFLK_2	0	LAQPYVGVFLK	y3/0.000	LAQPYVGVFLK	2	103777_LAQPYVGVFLK_2	1/P36776	1	y	-1	light
1/P36776	617.863	825.487	70.1	1589775_LAQPYVGVFLK_2	-1	1095.8	103777_LAQPYVGVFLK_2	0	LAQPYVGVFLK	y7/-0.003	LAQPYVGVFLK	2	103777_LAQPYVGVFLK_2	1/P36776	1	y	-1	light
1/P36776	617.863	563.355	70.1	1589772_LAQPYVGVFLK_2	-1	2570.5	103777_LAQPYVGVFLK_2	0	LAQPYVGVFLK	y5/-0.002	LAQPYVGVFLK	2	103777_LAQPYVGVFLK_2	1/P36776	1	y	-1	light
1/P36776	617.863	662.424	70.1	1589774_LAQPYVGVFLK_2	-1	1306.8	103777_LAQPYVGVFLK_2	0	LAQPYVGVFLK	y6/-0.001	LAQPYVGVFLK	2	103777_LAQPYVGVFLK_2	1/P36776	1	y	-1	light
1/P36776	617.863	525.803	70.1	1589771_LAQPYVGVFLK_2	-1	1324	103777_LAQPYVGVFLK_2	0	LAQPYVGVFLK	y9^2/-0.001	LAQPYVGVFLK	2	103777_LAQPYVGVFLK_2	1/P36776	2	y	-1	light
1/P36776	617.863	922.54	70.1	1589776_LAQPYVGVFLK_2	-1	10000	103777_LAQPYVGVFLK_2	0	LAQPYVGVFLK	y8/-0.003	LAQPYVGVFLK	2	103777_LAQPYVGVFLK_2	1/P36776	1	y	-1	light
1/P36776	464.278	539.824	53.1	1589784_LAQPYVGVFLKR_3	-1	5454.2	103778_LAQPYVGVFLKR_3	0	LAQPYVGVFLKR	y9^2/-0.001	LAQPYVGVFLKR	3	103778_LAQPYVGVFLKR_3	1/P36776	2	y	-1	light
1/P36776	464.278	563.366	53.1	1589786_LAQPYVGVFLKR_3	-1	1095.1	103778_LAQPYVGVFLKR_3	0	LAQPYVGVFLKR	y4/0.007	LAQPYVGVFLKR	3	103778_LAQPYVGVFLKR_3	1/P36776	1	y	-1	light
1/P36776	464.278	603.853	53.1	1589787_LAQPYVGVFLKR_3	-1	657.1	103778_LAQPYVGVFLKR_3	0	LAQPYVGVFLKR	y10^2/-0.010	LAQPYVGVFLKR	3	103778_LAQPYVGVFLKR_3	1/P36776	2	y	-1	light
1/P36776	464.278	416.298	53.1	1589781_LAQPYVGVFLKR_3	-1	842.2	103778_LAQPYVGVFLKR_3	0	LAQPYVGVFLKR	y3/0.001	LAQPYVGVFLKR	3	103778_LAQPYVGVFLKR_3	1/P36776	1	y	-1	light
1/P36776	464.278	719.456	53.1	1589790_LAQPYVGVFLKR_3	-1	1890.9	103778_LAQPYVGVFLKR_3	0	LAQPYVGVFLKR	[y6/-0.018]	LAQPYVGVFLKR	3	103778_LAQPYVGVFLKR_3	1/P36776	1	y	-1	light
1/P36776	464.278	818.525	53.1	1589793_LAQPYVGVFLKR_3	-1	1519.8	103778_LAQPYVGVFLKR_3	0	LAQPYVGVFLKR	y7/-0.004	LAQPYVGVFLKR	3	103778_LAQPYVGVFLKR_3	1/P36776	1	y	-1	light
1/Q9BV23	865.095	722.445	137.7	1448280_b7_1_IPLIPSTPEEMSEMLQLC(UniMod:4)SYVR_3	-1	7760	103794_IPLIPSTPEEMSEMLQLC(UniMod:4)SYVR_3	0	IPLIPSTPEEMSEMLQLCSYVR	b7/0.015	IPLIPSTPEEMSEMLQLC(UniMod:4)SYVR	3	103794_IPLIPSTPEEMSEMLQLC(UniMod:4)SYVR_3	1/Q9BV23	1	b	7	light
1/Q9BV23	865.095	1385.66	137.7	1448285_y11_1_IPLIPSTPEEMSEMLQLC(UniMod:4)SYVR_3	-1	3930.1	103794_IPLIPSTPEEMSEMLQLC(UniMod:4)SYVR_3	0	IPLIPSTPEEMSEMLQLCSYVR	y11/-0.003	IPLIPSTPEEMSEMLQLC(UniMod:4)SYVR	3	103794_IPLIPSTPEEMSEMLQLC(UniMod:4)SYVR_3	1/Q9BV23	1	y	11	light
1/Q9BV23	865.095	1169.58	137.7	1448283_y9_1_IPLIPSTPEEMSEMLQLC(UniMod:4)SYVR_3	-1	5691.5	103794_IPLIPSTPEEMSEMLQLC(UniMod:4)SYVR_3	0	IPLIPSTPEEMSEMLQLCSYVR	y9/-0.019,y20-45^2/0.002	IPLIPSTPEEMSEMLQLC(UniMod:4)SYVR	3	103794_IPLIPSTPEEMSEMLQLC(UniMod:4)SYVR_3	1/Q9BV23	1	y	9	light
1/Q9BV23	865.095	684.313	137.7	1448279_y5_1_IPLIPSTPEEMSEMLQLC(UniMod:4)SYVR_3	-1	10000	103794_IPLIPSTPEEMSEMLQLC(UniMod:4)SYVR_3	0	IPLIPSTPEEMSEMLQLCSYVR	y5/-0.006,y11-18^2/-0.019	IPLIPSTPEEMSEMLQLC(UniMod:4)SYVR	3	103794_IPLIPSTPEEMSEMLQLC(UniMod:4)SYVR_3	1/Q9BV23	1	y	5	light
1/Q9BV23	865.095	797.397	137.7	1448282_y6_1_IPLIPSTPEEMSEMLQLC(UniMod:4)SYVR_3	-1	6592.2	103794_IPLIPSTPEEMSEMLQLC(UniMod:4)SYVR_3	0	IPLIPSTPEEMSEMLQLCSYVR	y6/-0.004	IPLIPSTPEEMSEMLQLC(UniMod:4)SYVR	3	103794_IPLIPSTPEEMSEMLQLC(UniMod:4)SYVR_3	1/Q9BV23	1	y	6	light
1/Q9BV23	865.095	524.283	137.7	1448278_y4_1_IPLIPSTPEEMSEMLQLC(UniMod:4)SYVR_3	-1	3520.7	103794_IPLIPSTPEEMSEMLQLC(UniMod:4)SYVR_3	0	IPLIPSTPEEMSEMLQLCSYVR	y4/0.005	IPLIPSTPEEMSEMLQLC(UniMod:4)SYVR	3	103794_IPLIPSTPEEMSEMLQLC(UniMod:4)SYVR_3	1/Q9BV23	1	y	4	light
1/P00488	728.881	1057.56	31.7	100917_y9_1_HVYGELDVQIQR_2	-1	2175.3	10380_HVYGELDVQIQR_2	0	HVYGELDVQIQR	y9/0.011	HVYGELDVQIQR	2	10380_HVYGELDVQIQR_2	1/P00488	1	y	9	light
1/P00488	728.881	758.416	31.7	100914_y6_1_HVYGELDVQIQR_2	-1	878.4	10380_HVYGELDVQIQR_2	0	HVYGELDVQIQR	y6/0.012	HVYGELDVQIQR	2	10380_HVYGELDVQIQR_2	1/P00488	1	y	6	light
1/P00488	728.881	871.5	31.7	100915_y7_1_HVYGELDVQIQR_2	-1	1008.5	10380_HVYGELDVQIQR_2	0	HVYGELDVQIQR	y7/-0.017	HVYGELDVQIQR	2	10380_HVYGELDVQIQR_2	1/P00488	1	y	7	light
1/P00488	728.881	1319.7	31.7	100919_y11_1_HVYGELDVQIQR_2	-1	1908.3	10380_HVYGELDVQIQR_2	0	HVYGELDVQIQR	y11/0.000	HVYGELDVQIQR	2	10380_HVYGELDVQIQR_2	1/P00488	1	y	11	light
1/P00488	728.881	643.389	31.7	100913_y5_1_HVYGELDVQIQR_2	-1	1685.2	10380_HVYGELDVQIQR_2	0	HVYGELDVQIQR	y5/0.002	HVYGELDVQIQR	2	10380_HVYGELDVQIQR_2	1/P00488	1	y	5	light
1/P00488	728.881	1220.63	31.7	100918_y10_1_HVYGELDVQIQR_2	-1	9239.7	10380_HVYGELDVQIQR_2	0	HVYGELDVQIQR	y10/-0.005	HVYGELDVQIQR	2	10380_HVYGELDVQIQR_2	1/P00488	1	y	10	light
1/P17301	518.628	389.251	78	1448412_y3_1_IPLLYDAEIHLTR_3	-1	1978.2	103807_IPLLYDAEIHLTR_3	0	IPLLYDAEIHLTR	y3/-0.001	IPLLYDAEIHLTR	3	103807_IPLLYDAEIHLTR_3	1/P17301	1	y	3	light
1/P17301	518.628	559.285	78	1448414_y9_2_IPLLYDAEIHLTR_3	-1	2186.7	103807_IPLLYDAEIHLTR_3	0	IPLLYDAEIHLTR	y9^2/-0.002	IPLLYDAEIHLTR	3	103807_IPLLYDAEIHLTR_3	1/P17301	2	y	9	light
1/P17301	518.628	526.31	78	1448413_y4_1_IPLLYDAEIHLTR_3	-1	2680	103807_IPLLYDAEIHLTR_3	0	IPLLYDAEIHLTR	y4/-0.002	IPLLYDAEIHLTR	3	103807_IPLLYDAEIHLTR_3	1/P17301	1	y	4	light
1/P17301	518.628	720.896	78	1448416_y12_2_IPLLYDAEIHLTR_3	-1	2315	103807_IPLLYDAEIHLTR_3	0	IPLLYDAEIHLTR	y12^2/-0.006	IPLLYDAEIHLTR	3	103807_IPLLYDAEIHLTR_3	1/P17301	2	y	12	light
1/P17301	518.628	954.5	78	1448418_y8_1_IPLLYDAEIHLTR_3	-1	1945.3	103807_IPLLYDAEIHLTR_3	0	IPLLYDAEIHLTR	y8/-0.002	IPLLYDAEIHLTR	3	103807_IPLLYDAEIHLTR_3	1/P17301	1	y	8	light
1/P17301	518.628	672.37	78	1448415_y11_2_IPLLYDAEIHLTR_3	-1	2428.8	103807_IPLLYDAEIHLTR_3	0	IPLLYDAEIHLTR	y11^2/-0.010,b12-36^2/-0.012	IPLLYDAEIHLTR	3	103807_IPLLYDAEIHLTR_3	1/P17301	2	y	11	light
1/P00488	486.256	544.32	31.1	100923_y4_1_HVYGELDVQIQR_3	-1	10000	10381_HVYGELDVQIQR_3	0	HVYGELDVQIQR	y4/0.000	HVYGELDVQIQR	3	10381_HVYGELDVQIQR_3	1/P00488	1	y	4	light
1/P00488	486.256	586.262	31.1	100924_b5_1_HVYGELDVQIQR_3	-1	6298	10381_HVYGELDVQIQR_3	0	HVYGELDVQIQR	b5/0.002	HVYGELDVQIQR	3	10381_HVYGELDVQIQR_3	1/P00488	1	b	5	light
1/P00488	486.256	643.389	31.1	100925_y5_1_HVYGELDVQIQR_3	-1	3156.2	10381_HVYGELDVQIQR_3	0	HVYGELDVQIQR	y5/0.003	HVYGELDVQIQR	3	10381_HVYGELDVQIQR_3	1/P00488	1	y	5	light
1/P00488	486.256	758.416	31.1	100927_y6_1_HVYGELDVQIQR_3	-1	2725.9	10381_HVYGELDVQIQR_3	0	HVYGELDVQIQR	y6/0.000	HVYGELDVQIQR	3	10381_HVYGELDVQIQR_3	1/P00488	1	y	6	light
1/P00488	486.256	416.262	31.1	100921_y3_1_HVYGELDVQIQR_3	-1	6820.9	10381_HVYGELDVQIQR_3	0	HVYGELDVQIQR	y3/0.002	HVYGELDVQIQR	3	10381_HVYGELDVQIQR_3	1/P00488	1	y	3	light
1/P00488	486.256	814.373	31.1	100928_b7_1_HVYGELDVQIQR_3	-1	7951.2	10381_HVYGELDVQIQR_3	0	HVYGELDVQIQR	b7/-0.001	HVYGELDVQIQR	3	10381_HVYGELDVQIQR_3	1/P00488	1	b	7	light
1/P03951	665.837	1120.53	12.4	1448807_y9_1_IPLVTNEEC(UniMod:4)QK_2	-1	1043.3	103834_IPLVTNEEC(UniMod:4)QK_2	0	IPLVTNEECQK	y9/-0.010	IPLVTNEEC(UniMod:4)QK	2	103834_IPLVTNEEC(UniMod:4)QK_2	1/P03951	1	y	9	light
1/P03951	665.837	435.202	12.4	1448797_y3_1_IPLVTNEEC(UniMod:4)QK_2	-1	799.5	103834_IPLVTNEEC(UniMod:4)QK_2	0	IPLVTNEECQK	y3/-0.003	IPLVTNEEC(UniMod:4)QK	2	103834_IPLVTNEEC(UniMod:4)QK_2	1/P03951	1	y	3	light
1/P03951	665.837	609.295	12.4	1448799_y10_2_IPLVTNEEC(UniMod:4)QK_2	-1	1625.4	103834_IPLVTNEEC(UniMod:4)QK_2	0	IPLVTNEECQK	y10^2/0.001	IPLVTNEEC(UniMod:4)QK	2	103834_IPLVTNEEC(UniMod:4)QK_2	1/P03951	2	y	10	light
1/P03951	665.837	807.33	12.4	1448802_y6_1_IPLVTNEEC(UniMod:4)QK_2	-1	704	103834_IPLVTNEEC(UniMod:4)QK_2	0	IPLVTNEECQK	y6/-0.005	IPLVTNEEC(UniMod:4)QK	2	103834_IPLVTNEEC(UniMod:4)QK_2	1/P03951	1	y	6	light
1/P03951	665.837	908.378	12.4	1448805_y7_1_IPLVTNEEC(UniMod:4)QK_2	-1	2226.9	103834_IPLVTNEEC(UniMod:4)QK_2	0	IPLVTNEECQK	y7/-0.002	IPLVTNEEC(UniMod:4)QK	2	103834_IPLVTNEEC(UniMod:4)QK_2	1/P03951	1	y	7	light
1/P03951	665.837	1007.45	12.4	1448806_y8_1_IPLVTNEEC(UniMod:4)QK_2	-1	1873	103834_IPLVTNEEC(UniMod:4)QK_2	0	IPLVTNEECQK	y8/-0.008	IPLVTNEEC(UniMod:4)QK	2	103834_IPLVTNEEC(UniMod:4)QK_2	1/P03951	1	y	8	light
1/Q8WXI4	424.753	492.293	15.1	149236_y4_1_ALATFVAR_2	-1	2468.2	10384_ALATFVAR_2	0	ALATFVAR	y4/-0.004	ALATFVAR	2	10384_ALATFVAR_2	1/Q8WXI4	1	y	4	light
1/Q8WXI4	424.753	389.235	15.1	149235_y7_2_ALATFVAR_2	-1	141.4	10384_ALATFVAR_2	0	ALATFVAR	y7^2/0.001	ALATFVAR	2	10384_ALATFVAR_2	1/Q8WXI4	2	y	7	light
1/Q8WXI4	424.753	357.213	15.1	149234_b4_1_ALATFVAR_2	-1	304.4	10384_ALATFVAR_2	0	ALATFVAR	b4/-0.003	ALATFVAR	2	10384_ALATFVAR_2	1/Q8WXI4	1	b	4	light
1/Q8WXI4	424.753	664.378	15.1	149241_y6_1_ALATFVAR_2	-1	10000	10384_ALATFVAR_2	0	ALATFVAR	y6/-0.003	ALATFVAR	2	10384_ALATFVAR_2	1/Q8WXI4	1	y	6	light
1/Q8WXI4	424.753	504.282	15.1	149237_b5_1_ALATFVAR_2	-1	128.2	10384_ALATFVAR_2	0	ALATFVAR	b5/0.008	ALATFVAR	2	10384_ALATFVAR_2	1/Q8WXI4	1	b	5	light
1/Q8WXI4	424.753	593.341	15.1	149238_y5_1_ALATFVAR_2	-1	3321.1	10384_ALATFVAR_2	0	ALATFVAR	y5/-0.004	ALATFVAR	2	10384_ALATFVAR_2	1/Q8WXI4	1	y	5	light
1/P54577	560.288	848.415	-2.5	1590907_LASAAYPDPSK_2	-1	1123.2	103840_LASAAYPDPSK_2	0	LASAAYPDPSK	y8/-0.001	LASAAYPDPSK	2	103840_LASAAYPDPSK_2	1/P54577	1	y	-1	light
1/P54577	560.288	706.341	-2.5	1590902_LASAAYPDPSK_2	-1	3430.9	103840_LASAAYPDPSK_2	0	LASAAYPDPSK	y6/-0.002	LASAAYPDPSK	2	103840_LASAAYPDPSK_2	1/P54577	1	y	-1	light
1/P54577	560.288	935.447	-2.5	1590908_LASAAYPDPSK_2	-1	4477.8	103840_LASAAYPDPSK_2	0	LASAAYPDPSK	y9/-0.004	LASAAYPDPSK	2	103840_LASAAYPDPSK_2	1/P54577	1	y	-1	light
1/P54577	560.288	543.277	-2.5	1590899_LASAAYPDPSK_2	-1	5493	103840_LASAAYPDPSK_2	0	LASAAYPDPSK	y5/-0.001	LASAAYPDPSK	2	103840_LASAAYPDPSK_2	1/P54577	1	y	-1	light
1/P54577	560.288	414.235	-2.5	1590896_LASAAYPDPSK_2	-1	914.2	103840_LASAAYPDPSK_2	0	LASAAYPDPSK	b5/-0.004	LASAAYPDPSK	2	103840_LASAAYPDPSK_2	1/P54577	1	b	-1	light
1/P54577	560.288	777.378	-2.5	1590904_LASAAYPDPSK_2	-1	3057.9	103840_LASAAYPDPSK_2	0	LASAAYPDPSK	y7/-0.001	LASAAYPDPSK	2	103840_LASAAYPDPSK_2	1/P54577	1	y	-1	light
1/Q99685	769.397	456.231	4.7	158888_ALIFVSHGAGEHSGR_2	-1	642.9	10385_ALIFVSHGAGEHSGR_2	0	ALIFVSHGAGEHSGR	y4/0.007	ALIFVSHGAGEHSGR	2	10385_ALIFVSHGAGEHSGR_2	1/Q99685	1	y	-1	light
1/Q99685	769.397	642.295	4.7	158893_ALIFVSHGAGEHSGR_2	-1	696.7	10385_ALIFVSHGAGEHSGR_2	0	ALIFVSHGAGEHSGR	y6/-0.010	ALIFVSHGAGEHSGR	2	10385_ALIFVSHGAGEHSGR_2	1/Q99685	1	y	-1	light
1/Q99685	769.397	1240.58	4.7	158900_ALIFVSHGAGEHSGR_2	-1	1171.1	10385_ALIFVSHGAGEHSGR_2	0	ALIFVSHGAGEHSGR	y12/0.011	ALIFVSHGAGEHSGR	2	10385_ALIFVSHGAGEHSGR_2	1/Q99685	1	y	-1	light
1/Q99685	769.397	907.413	4.7	158897_ALIFVSHGAGEHSGR_2	-1	701.4	10385_ALIFVSHGAGEHSGR_2	0	ALIFVSHGAGEHSGR	y9/0.002	ALIFVSHGAGEHSGR	2	10385_ALIFVSHGAGEHSGR_2	1/Q99685	1	y	-1	light
1/Q99685	769.397	620.795	4.7	158891_ALIFVSHGAGEHSGR_2	-1	757.7	10385_ALIFVSHGAGEHSGR_2	0	ALIFVSHGAGEHSGR	y12^2/-0.016	ALIFVSHGAGEHSGR	2	10385_ALIFVSHGAGEHSGR_2	1/Q99685	2	y	-1	light
1/Q99685	769.397	994.445	4.7	158898_ALIFVSHGAGEHSGR_2	-1	1343.3	10385_ALIFVSHGAGEHSGR_2	0	ALIFVSHGAGEHSGR	y10/0.000	ALIFVSHGAGEHSGR	2	10385_ALIFVSHGAGEHSGR_2	1/Q99685	1	y	-1	light
1/Q99685	513.267	620.795	2.2	158908_ALIFVSHGAGEHSGR_3	-1	2490.9	10386_ALIFVSHGAGEHSGR_3	0	ALIFVSHGAGEHSGR	y12^2/-0.003	ALIFVSHGAGEHSGR	3	10386_ALIFVSHGAGEHSGR_3	1/Q99685	2	y	-1	light
1/Q99685	513.267	454.21	2.2	158904_ALIFVSHGAGEHSGR_3	-1	734.2	10386_ALIFVSHGAGEHSGR_3	0	ALIFVSHGAGEHSGR	y9^2/0.000	ALIFVSHGAGEHSGR	3	10386_ALIFVSHGAGEHSGR_3	1/Q99685	2	y	-1	light
1/Q99685	513.267	770.354	2.2	158913_ALIFVSHGAGEHSGR_3	-1	2352.5	10386_ALIFVSHGAGEHSGR_3	0	ALIFVSHGAGEHSGR	y8/-0.003	ALIFVSHGAGEHSGR	3	10386_ALIFVSHGAGEHSGR_3	1/Q99685	1	y	-1	light
1/Q99685	513.267	547.26	2.2	158907_ALIFVSHGAGEHSGR_3	-1	963.2	10386_ALIFVSHGAGEHSGR_3	0	ALIFVSHGAGEHSGR	y11^2/-0.000	ALIFVSHGAGEHSGR	3	10386_ALIFVSHGAGEHSGR_3	1/Q99685	2	y	-1	light
1/Q99685	513.267	497.726	2.2	158906_ALIFVSHGAGEHSGR_3	-1	900.5	10386_ALIFVSHGAGEHSGR_3	0	ALIFVSHGAGEHSGR	y10^2/-0.004	ALIFVSHGAGEHSGR	3	10386_ALIFVSHGAGEHSGR_3	1/Q99685	2	y	-1	light
1/Q99685	513.267	677.337	2.2	158910_ALIFVSHGAGEHSGR_3	-1	1619.3	10386_ALIFVSHGAGEHSGR_3	0	ALIFVSHGAGEHSGR	y13^2/0.001	ALIFVSHGAGEHSGR	3	10386_ALIFVSHGAGEHSGR_3	1/Q99685	2	y	-1	light
1/Q99685	575.545	737.855	25	158938_ALIFVSHGAGEHSGRYEELAR_4	-1	939.3	10388_ALIFVSHGAGEHSGRYEELAR_4	0	ALIFVSHGAGEHSGRYEELAR	y13^2/-0.004	ALIFVSHGAGEHSGRYEELAR	4	10388_ALIFVSHGAGEHSGRYEELAR_4	1/Q99685	2	y	-1	light
1/Q99685	575.545	609.305	25	158934_ALIFVSHGAGEHSGRYEELAR_4	-1	1069.5	10388_ALIFVSHGAGEHSGRYEELAR_4	0	ALIFVSHGAGEHSGRYEELAR	y10^2/-0.002	ALIFVSHGAGEHSGRYEELAR	4	10388_ALIFVSHGAGEHSGRYEELAR_4	1/Q99685	2	y	-1	light
1/Q99685	575.545	834.895	25	158942_ALIFVSHGAGEHSGRYEELAR_4	-1	1211.9	10388_ALIFVSHGAGEHSGRYEELAR_4	0	ALIFVSHGAGEHSGRYEELAR	y15^2/0.001	ALIFVSHGAGEHSGRYEELAR	4	10388_ALIFVSHGAGEHSGRYEELAR_4	1/Q99685	2	y	-1	light
1/Q99685	575.545	702.337	25	158937_ALIFVSHGAGEHSGRYEELAR_4	-1	825.9	10388_ALIFVSHGAGEHSGRYEELAR_4	0	ALIFVSHGAGEHSGRYEELAR	y12^2/0.002	ALIFVSHGAGEHSGRYEELAR	4	10388_ALIFVSHGAGEHSGRYEELAR_4	1/Q99685	2	y	-1	light
1/Q99685	575.545	766.366	25	158940_ALIFVSHGAGEHSGRYEELAR_4	-1	6412	10388_ALIFVSHGAGEHSGRYEELAR_4	0	ALIFVSHGAGEHSGRYEELAR	y14^2/-0.001	ALIFVSHGAGEHSGRYEELAR	4	10388_ALIFVSHGAGEHSGRYEELAR_4	1/Q99685	2	y	-1	light
1/Q99685	575.545	878.412	25	158943_ALIFVSHGAGEHSGRYEELAR_4	-1	2267.3	10388_ALIFVSHGAGEHSGRYEELAR_4	0	ALIFVSHGAGEHSGRYEELAR	y16^2/-0.002	ALIFVSHGAGEHSGRYEELAR	4	10388_ALIFVSHGAGEHSGRYEELAR_4	1/Q99685	2	y	-1	light
1/Q99685	460.637	878.412	25.8	158956_ALIFVSHGAGEHSGRYEELAR_5	-1	811.5	10389_ALIFVSHGAGEHSGRYEELAR_5	0	ALIFVSHGAGEHSGRYEELAR	y16^2/-0.002	ALIFVSHGAGEHSGRYEELAR	5	10389_ALIFVSHGAGEHSGRYEELAR_5	1/Q99685	2	y	-1	light
1/Q99685	460.637	609.305	25.8	158949_ALIFVSHGAGEHSGRYEELAR_5	-1	1057.8	10389_ALIFVSHGAGEHSGRYEELAR_5	0	ALIFVSHGAGEHSGRYEELAR	y10^2/0.002	ALIFVSHGAGEHSGRYEELAR	5	10389_ALIFVSHGAGEHSGRYEELAR_5	1/Q99685	2	y	-1	light
1/Q99685	460.637	702.337	25.8	158951_ALIFVSHGAGEHSGRYEELAR_5	-1	856.3	10389_ALIFVSHGAGEHSGRYEELAR_5	0	ALIFVSHGAGEHSGRYEELAR	y12^2/0.007	ALIFVSHGAGEHSGRYEELAR	5	10389_ALIFVSHGAGEHSGRYEELAR_5	1/Q99685	2	y	-1	light
1/Q99685	460.637	653.831	25.8	158950_ALIFVSHGAGEHSGRYEELAR_5	-1	809.9	10389_ALIFVSHGAGEHSGRYEELAR_5	0	ALIFVSHGAGEHSGRYEELAR	b13^2/0.011	ALIFVSHGAGEHSGRYEELAR	5	10389_ALIFVSHGAGEHSGRYEELAR_5	1/Q99685	2	b	-1	light
1/Q99685	460.637	540.775	25.8	158948_ALIFVSHGAGEHSGRYEELAR_5	-1	1174.6	10389_ALIFVSHGAGEHSGRYEELAR_5	0	ALIFVSHGAGEHSGRYEELAR	y9^2/0.003	ALIFVSHGAGEHSGRYEELAR	5	10389_ALIFVSHGAGEHSGRYEELAR_5	1/Q99685	2	y	-1	light
1/Q99685	460.637	766.366	25.8	158953_ALIFVSHGAGEHSGRYEELAR_5	-1	5615.6	10389_ALIFVSHGAGEHSGRYEELAR_5	0	ALIFVSHGAGEHSGRYEELAR	y14^2/-0.002	ALIFVSHGAGEHSGRYEELAR	5	10389_ALIFVSHGAGEHSGRYEELAR_5	1/Q99685	2	y	-1	light
1/O00187	875.905	589.757	31.9	1592882_LASPGFPGEYANDQER_2	-1	1991.6	103965_LASPGFPGEYANDQER_2	0	LASPGFPGEYANDQER	y10^2/0.001	LASPGFPGEYANDQER	2	103965_LASPGFPGEYANDQER_2	1/O00187	2	y	-1	light
1/O00187	875.905	740.329	31.9	1592887_LASPGFPGEYANDQER_2	-1	4085	103965_LASPGFPGEYANDQER_2	0	LASPGFPGEYANDQER	y13^2/0.004	LASPGFPGEYANDQER	2	103965_LASPGFPGEYANDQER_2	1/O00187	2	y	-1	light
1/O00187	875.905	1178.51	31.9	1592894_LASPGFPGEYANDQER_2	-1	10000	103965_LASPGFPGEYANDQER_2	0	LASPGFPGEYANDQER	[y10/-0.011]	LASPGFPGEYANDQER	2	103965_LASPGFPGEYANDQER_2	1/O00187	1	y	-1	light
1/O00187	875.905	432.22	31.9	1592879_LASPGFPGEYANDQER_2	-1	2233.5	103965_LASPGFPGEYANDQER_2	0	LASPGFPGEYANDQER	y3/0.003	LASPGFPGEYANDQER	2	103965_LASPGFPGEYANDQER_2	1/O00187	1	y	-1	light
1/O00187	875.905	895.39	31.9	1592890_LASPGFPGEYANDQER_2	-1	1861.7	103965_LASPGFPGEYANDQER_2	0	LASPGFPGEYANDQER	y7/0.000	LASPGFPGEYANDQER	2	103965_LASPGFPGEYANDQER_2	1/O00187	1	y	-1	light
1/O00187	875.905	573.303	31.9	1592881_LASPGFPGEYANDQER_2	-1	2075.3	103965_LASPGFPGEYANDQER_2	0	LASPGFPGEYANDQER	b6/-0.006	LASPGFPGEYANDQER	2	103965_LASPGFPGEYANDQER_2	1/O00187	1	b	-1	light
1/O00187	584.273	732.327	32.7	1592910_LASPGFPGEYANDQER_3	-1	8626.1	103966_LASPGFPGEYANDQER_3	0	LASPGFPGEYANDQER	y6/-0.013	LASPGFPGEYANDQER	3	103966_LASPGFPGEYANDQER_3	1/O00187	1	y	-1	light
1/O00187	584.273	661.29	32.7	1592907_LASPGFPGEYANDQER_3	-1	4925	103966_LASPGFPGEYANDQER_3	0	LASPGFPGEYANDQER	y5/-0.002	LASPGFPGEYANDQER	3	103966_LASPGFPGEYANDQER_3	1/O00187	1	y	-1	light
1/O00187	584.273	573.303	32.7	1592905_LASPGFPGEYANDQER_3	-1	7003.2	103966_LASPGFPGEYANDQER_3	0	LASPGFPGEYANDQER	b6/-0.002	LASPGFPGEYANDQER	3	103966_LASPGFPGEYANDQER_3	1/O00187	1	b	-1	light
1/O00187	584.273	589.757	32.7	1592906_LASPGFPGEYANDQER_3	-1	10000	103966_LASPGFPGEYANDQER_3	0	LASPGFPGEYANDQER	y10^2/0.007	LASPGFPGEYANDQER	3	103966_LASPGFPGEYANDQER_3	1/O00187	2	y	-1	light
1/O00187	584.273	856.42	32.7	1592914_LASPGFPGEYANDQER_3	-1	4809	103966_LASPGFPGEYANDQER_3	0	LASPGFPGEYANDQER	b9/-0.017	LASPGFPGEYANDQER	3	103966_LASPGFPGEYANDQER_3	1/O00187	1	b	-1	light
1/O00187	584.273	547.247	32.7	1592904_LASPGFPGEYANDQER_3	-1	3778.2	103966_LASPGFPGEYANDQER_3	0	LASPGFPGEYANDQER	y4/0.018	LASPGFPGEYANDQER	3	103966_LASPGFPGEYANDQER_3	1/O00187	1	y	-1	light
1/Q86VB7	875.901	740.325	36.6	1592924_LASPSEETWITC(UniMod:4)DNK_2	-1	7824.4	103967_LASPSEETWITC(UniMod:4)DNK_2	0	LASPSEETWITCDNK	y12^2/-0.007	LASPSEETWITC(UniMod:4)DNK	2	103967_LASPSEETWITC(UniMod:4)DNK_2	1/Q86VB7	2	y	-1	light
1/Q86VB7	875.901	936.424	36.6	1592928_LASPSEETWITC(UniMod:4)DNK_2	-1	4079.1	103967_LASPSEETWITC(UniMod:4)DNK_2	0	LASPSEETWITCDNK	y7/-0.019	LASPSEETWITC(UniMod:4)DNK	2	103967_LASPSEETWITC(UniMod:4)DNK_2	1/Q86VB7	1	y	-1	light
1/Q86VB7	875.901	637.261	36.6	1592922_LASPSEETWITC(UniMod:4)DNK_2	-1	10000	103967_LASPSEETWITC(UniMod:4)DNK_2	0	LASPSEETWITCDNK	y5/-0.001	LASPSEETWITC(UniMod:4)DNK	2	103967_LASPSEETWITC(UniMod:4)DNK_2	1/Q86VB7	1	y	-1	light
1/Q86VB7	875.901	1037.47	36.6	1592930_LASPSEETWITC(UniMod:4)DNK_2	-1	4331.3	103967_LASPSEETWITC(UniMod:4)DNK_2	0	LASPSEETWITCDNK	y8/-0.008	LASPSEETWITC(UniMod:4)DNK	2	103967_LASPSEETWITC(UniMod:4)DNK_2	1/Q86VB7	1	y	-1	light
1/Q86VB7	875.901	750.345	36.6	1592926_LASPSEETWITC(UniMod:4)DNK_2	-1	6227.5	103967_LASPSEETWITC(UniMod:4)DNK_2	0	LASPSEETWITCDNK	[y6/0.014]	LASPSEETWITC(UniMod:4)DNK	2	103967_LASPSEETWITC(UniMod:4)DNK_2	1/Q86VB7	1	y	-1	light
1/Q86VB7	875.901	1382.59	36.6	1592934_LASPSEETWITC(UniMod:4)DNK_2	-1	4134.3	103967_LASPSEETWITC(UniMod:4)DNK_2	0	LASPSEETWITCDNK	y11/-0.013	LASPSEETWITC(UniMod:4)DNK	2	103967_LASPSEETWITC(UniMod:4)DNK_2	1/Q86VB7	1	y	-1	light
1/Q86VB7	638.016	535.691	12.1	101100_b8_2_HYC(UniMod:4)NHNEDAGVTC(UniMod:4)SDGSDLELR_4	-1	3861.9	10399_HYC(UniMod:4)NHNEDAGVTC(UniMod:4)SDGSDLELR_4	0	HYCNHNEDAGVTCSDGSDLELR	b8^2/0.005	HYC(UniMod:4)NHNEDAGVTC(UniMod:4)SDGSDLELR	4	10399_HYC(UniMod:4)NHNEDAGVTC(UniMod:4)SDGSDLELR_4	1/Q86VB7	2	b	8	light
1/Q86VB7	638.016	789.41	12.1	101112_y7_1_HYC(UniMod:4)NHNEDAGVTC(UniMod:4)SDGSDLELR_4	-1	7028.6	10399_HYC(UniMod:4)NHNEDAGVTC(UniMod:4)SDGSDLELR_4	0	HYCNHNEDAGVTCSDGSDLELR	y7/-0.000	HYC(UniMod:4)NHNEDAGVTC(UniMod:4)SDGSDLELR	4	10399_HYC(UniMod:4)NHNEDAGVTC(UniMod:4)SDGSDLELR_4	1/Q86VB7	1	y	7	light
1/Q86VB7	638.016	645.357	12.1	101106_y5_1_HYC(UniMod:4)NHNEDAGVTC(UniMod:4)SDGSDLELR_4	-1	5171.3	10399_HYC(UniMod:4)NHNEDAGVTC(UniMod:4)SDGSDLELR_4	0	HYCNHNEDAGVTCSDGSDLELR	y5/0.002	HYC(UniMod:4)NHNEDAGVTC(UniMod:4)SDGSDLELR	4	10399_HYC(UniMod:4)NHNEDAGVTC(UniMod:4)SDGSDLELR_4	1/Q86VB7	1	y	5	light
1/Q86VB7	638.016	649.254	12.1	101107_b11_2_HYC(UniMod:4)NHNEDAGVTC(UniMod:4)SDGSDLELR_4	-1	4732.4	10399_HYC(UniMod:4)NHNEDAGVTC(UniMod:4)SDGSDLELR_4	0	HYCNHNEDAGVTCSDGSDLELR	b11^2/0.005	HYC(UniMod:4)NHNEDAGVTC(UniMod:4)SDGSDLELR	4	10399_HYC(UniMod:4)NHNEDAGVTC(UniMod:4)SDGSDLELR_4	1/Q86VB7	2	b	11	light
1/Q86VB7	638.016	530.33	12.1	101099_y4_1_HYC(UniMod:4)NHNEDAGVTC(UniMod:4)SDGSDLELR_4	-1	7512.8	10399_HYC(UniMod:4)NHNEDAGVTC(UniMod:4)SDGSDLELR_4	0	HYCNHNEDAGVTCSDGSDLELR	y4/-0.000	HYC(UniMod:4)NHNEDAGVTC(UniMod:4)SDGSDLELR	4	10399_HYC(UniMod:4)NHNEDAGVTC(UniMod:4)SDGSDLELR_4	1/Q86VB7	1	y	4	light
1/Q86VB7	638.016	599.72	12.1	101105_b10_2_HYC(UniMod:4)NHNEDAGVTC(UniMod:4)SDGSDLELR_4	-1	10000	10399_HYC(UniMod:4)NHNEDAGVTC(UniMod:4)SDGSDLELR_4	0	HYCNHNEDAGVTCSDGSDLELR	b10^2/-0.002	HYC(UniMod:4)NHNEDAGVTC(UniMod:4)SDGSDLELR	4	10399_HYC(UniMod:4)NHNEDAGVTC(UniMod:4)SDGSDLELR_4	1/Q86VB7	2	b	10	light
1/Q9H3G5	441.711	664.308	-5.6	815_y5_1_AFDM(UniMod:35)INR_2	-1	5416.4	104_AFDM(UniMod:35)INR_2	0	AFDMINR	y5/0.004,b6-44/0.000	AFDM(UniMod:35)INR	2	104_AFDM(UniMod:35)INR_2	1/Q9H3G5	1	y	5	light
1/Q9H3G5	441.711	549.281	-5.6	814_y4_1_AFDM(UniMod:35)INR_2	-1	1564.5	104_AFDM(UniMod:35)INR_2	0	AFDMINR	y4/-0.002	AFDM(UniMod:35)INR	2	104_AFDM(UniMod:35)INR_2	1/Q9H3G5	1	y	4	light
1/Q9H3G5	441.711	402.246	-5.6	811_y3_1_AFDM(UniMod:35)INR_2	-1	789.6	104_AFDM(UniMod:35)INR_2	0	AFDMINR	y3/-0.003	AFDM(UniMod:35)INR	2	104_AFDM(UniMod:35)INR_2	1/Q9H3G5	1	y	3	light
1/Q9H3G5	441.711	481.175	-5.6	813_b4_1_AFDM(UniMod:35)INR_2	-1	304.1	104_AFDM(UniMod:35)INR_2	0	AFDMINR	b4/0.003	AFDM(UniMod:35)INR	2	104_AFDM(UniMod:35)INR_2	1/Q9H3G5	1	b	4	light
1/Q9H3G5	441.711	406.192	-5.6	812_y6_2_AFDM(UniMod:35)INR_2	-1	501.4	104_AFDM(UniMod:35)INR_2	0	AFDMINR	y6^2/0.000	AFDM(UniMod:35)INR	2	104_AFDM(UniMod:35)INR_2	1/Q9H3G5	2	y	6	light
1/Q9H3G5	441.711	811.377	-5.6	817_y6_1_AFDM(UniMod:35)INR_2	-1	219.6	104_AFDM(UniMod:35)INR_2	0	AFDMINR	y6/0.013	AFDM(UniMod:35)INR	2	104_AFDM(UniMod:35)INR_2	1/Q9H3G5	1	y	6	light
1/Q14118	628.943	809.352	15.3	1451190_y7_1_IPSDTFYDHEDTTTDK_3	-1	836.3	104002_IPSDTFYDHEDTTTDK_3	0	IPSDTFYDHEDTTTDK	y7/-0.007	IPSDTFYDHEDTTTDK	3	104002_IPSDTFYDHEDTTTDK_3	1/Q14118	1	y	7	light
1/Q14118	628.943	794.326	15.3	1451189_y13_2_IPSDTFYDHEDTTTDK_3	-1	725.3	104002_IPSDTFYDHEDTTTDK_3	0	IPSDTFYDHEDTTTDK	y13^2/0.008,b14-36^2/0.001	IPSDTFYDHEDTTTDK	3	104002_IPSDTFYDHEDTTTDK_3	1/Q14118	2	y	13	light
1/Q14118	628.943	565.283	15.3	1451184_y5_1_IPSDTFYDHEDTTTDK_3	-1	790.4	104002_IPSDTFYDHEDTTTDK_3	0	IPSDTFYDHEDTTTDK	y5/-0.004	IPSDTFYDHEDTTTDK	3	104002_IPSDTFYDHEDTTTDK_3	1/Q14118	1	y	5	light
1/Q14118	628.943	837.842	15.3	1451191_y14_2_IPSDTFYDHEDTTTDK_3	-1	2351.4	104002_IPSDTFYDHEDTTTDK_3	0	IPSDTFYDHEDTTTDK	y14^2/-0.002	IPSDTFYDHEDTTTDK	3	104002_IPSDTFYDHEDTTTDK_3	1/Q14118	2	y	14	light
1/Q14118	628.943	886.368	15.3	1451194_y15_2_IPSDTFYDHEDTTTDK_3	-1	2692.6	104002_IPSDTFYDHEDTTTDK_3	0	IPSDTFYDHEDTTTDK	y15^2/-0.001	IPSDTFYDHEDTTTDK	3	104002_IPSDTFYDHEDTTTDK_3	1/Q14118	2	y	15	light
1/Q14118	628.943	736.812	15.3	1451188_y12_2_IPSDTFYDHEDTTTDK_3	-1	677.4	104002_IPSDTFYDHEDTTTDK_3	0	IPSDTFYDHEDTTTDK	y12^2/0.009	IPSDTFYDHEDTTTDK	3	104002_IPSDTFYDHEDTTTDK_3	1/Q14118	2	y	12	light
1/Q14118	532.254	388.292	22	1451199_y3_1_IPSDTFYDHEDTTTDKLK_4	-1	752.8	104003_IPSDTFYDHEDTTTDKLK_4	0	IPSDTFYDHEDTTTDKLK	y3/-0.004	IPSDTFYDHEDTTTDKLK	4	104003_IPSDTFYDHEDTTTDKLK_4	1/Q14118	1	y	3	light
1/Q14118	532.254	503.319	22	1451200_y4_1_IPSDTFYDHEDTTTDKLK_4	-1	603.5	104003_IPSDTFYDHEDTTTDKLK_4	0	IPSDTFYDHEDTTTDKLK	y4/-0.003	IPSDTFYDHEDTTTDKLK	4	104003_IPSDTFYDHEDTTTDKLK_4	1/Q14118	1	y	4	light
1/Q14118	532.254	958.431	22	1451209_y16_2_IPSDTFYDHEDTTTDKLK_4	-1	763.1	104003_IPSDTFYDHEDTTTDKLK_4	0	IPSDTFYDHEDTTTDKLK	y16^2/-0.008	IPSDTFYDHEDTTTDKLK	4	104003_IPSDTFYDHEDTTTDKLK_4	1/Q14118	2	y	16	light
1/Q14118	532.254	733.344	22	1451205_y12_2_IPSDTFYDHEDTTTDKLK_4	-1	759.7	104003_IPSDTFYDHEDTTTDKLK_4	0	IPSDTFYDHEDTTTDKLK	y12^2/0.005	IPSDTFYDHEDTTTDKLK	4	104003_IPSDTFYDHEDTTTDKLK_4	1/Q14118	2	y	12	light
1/Q14118	532.254	604.366	22	1451202_y5_1_IPSDTFYDHEDTTTDKLK_4	-1	1067.5	104003_IPSDTFYDHEDTTTDKLK_4	0	IPSDTFYDHEDTTTDKLK	y5/-0.008	IPSDTFYDHEDTTTDKLK	4	104003_IPSDTFYDHEDTTTDKLK_4	1/Q14118	1	y	5	light
1/Q14118	532.254	594.299	22	1451201_y10_2_IPSDTFYDHEDTTTDKLK_4	-1	583.6	104003_IPSDTFYDHEDTTTDKLK_4	0	IPSDTFYDHEDTTTDKLK	y10^2/0.001	IPSDTFYDHEDTTTDKLK	4	104003_IPSDTFYDHEDTTTDKLK_4	1/Q14118	2	y	10	light
1/Q12805	454.241	697.338	-32.5	1451534_y6_1_IPSNPSHR_2	-1	1681.3	104028_IPSNPSHR_2	0	IPSNPSHR	y6/-0.002,b7-36/-0.006	IPSNPSHR	2	104028_IPSNPSHR_2	1/Q12805	1	y	6	light
1/Q12805	454.241	794.39	-32.5	1451536_y7_1_IPSNPSHR_2	-1	1335.4	104028_IPSNPSHR_2	0	IPSNPSHR	y7/0.012	IPSNPSHR	2	104028_IPSNPSHR_2	1/Q12805	1	y	7	light
1/Q12805	454.241	399.21	-32.5	1451530_y3_1_IPSNPSHR_2	-1	209.4	104028_IPSNPSHR_2	0	IPSNPSHR	y3/0.012	IPSNPSHR	2	104028_IPSNPSHR_2	1/Q12805	1	y	3	light
1/Q12805	454.241	496.263	-32.5	1451532_y4_1_IPSNPSHR_2	-1	2336.9	104028_IPSNPSHR_2	0	IPSNPSHR	y4/0.001	IPSNPSHR	2	104028_IPSNPSHR_2	1/Q12805	1	y	4	light
1/Q12805	454.241	610.306	-32.5	1451533_y5_1_IPSNPSHR_2	-1	576.6	104028_IPSNPSHR_2	0	IPSNPSHR	y5/-0.009	IPSNPSHR	2	104028_IPSNPSHR_2	1/Q12805	1	y	5	light
1/Q12805	454.241	397.699	-32.5	1451529_y7_2_IPSNPSHR_2	-1	1556.9	104028_IPSNPSHR_2	0	IPSNPSHR	y7^2/0.003	IPSNPSHR	2	104028_IPSNPSHR_2	1/Q12805	2	y	7	light
1/P00738	573.775	774.342	-25.5	101170_b7_1_HYEGSTVPEK_2	-1	3206	10404_HYEGSTVPEK_2	0	HYEGSTVPEK	b7/0.001	HYEGSTVPEK	2	10404_HYEGSTVPEK_2	1/P00738	1	b	7	light
1/P00738	573.775	1009.48	-25.5	101173_y9_1_HYEGSTVPEK_2	-1	2483.2	10404_HYEGSTVPEK_2	0	HYEGSTVPEK	y9/0.000	HYEGSTVPEK	2	10404_HYEGSTVPEK_2	1/P00738	1	y	9	light
1/P00738	573.775	675.273	-25.5	101168_b6_1_HYEGSTVPEK_2	-1	1050.5	10404_HYEGSTVPEK_2	0	HYEGSTVPEK	b6/0.001	HYEGSTVPEK	2	10404_HYEGSTVPEK_2	1/P00738	1	b	6	light
1/P00738	573.775	717.378	-25.5	101169_y7_1_HYEGSTVPEK_2	-1	948.5	10404_HYEGSTVPEK_2	0	HYEGSTVPEK	y7/0.004	HYEGSTVPEK	2	10404_HYEGSTVPEK_2	1/P00738	1	y	7	light
1/P00738	573.775	846.42	-25.5	101171_y8_1_HYEGSTVPEK_2	-1	2992.9	10404_HYEGSTVPEK_2	0	HYEGSTVPEK	y8/0.002	HYEGSTVPEK	2	10404_HYEGSTVPEK_2	1/P00738	1	y	8	light
1/P00738	573.775	373.208	-25.5	101163_y3_1_HYEGSTVPEK_2	-1	10000	10404_HYEGSTVPEK_2	0	HYEGSTVPEK	y3/0.002	HYEGSTVPEK	2	10404_HYEGSTVPEK_2	1/P00738	1	y	3	light
1/P00738	637.822	1000.44	-31.7	101184_b9_1_HYEGSTVPEKK_2	-1	1911.3	10405_HYEGSTVPEKK_2	0	HYEGSTVPEKK	b9/-0.004	HYEGSTVPEKK	2	10405_HYEGSTVPEKK_2	1/P00738	1	b	9	light
1/P00738	637.822	501.303	-31.7	101177_y4_1_HYEGSTVPEKK_2	-1	9015.4	10405_HYEGSTVPEKK_2	0	HYEGSTVPEKK	y4/0.001	HYEGSTVPEKK	2	10405_HYEGSTVPEKK_2	1/P00738	1	y	4	light
1/P00738	637.822	1137.58	-31.7	101186_y10_1_HYEGSTVPEKK_2	-1	3391.7	10405_HYEGSTVPEKK_2	0	HYEGSTVPEKK	y10/-0.001	HYEGSTVPEKK	2	10405_HYEGSTVPEKK_2	1/P00738	1	y	10	light
1/P00738	637.822	845.473	-31.7	101182_y8_1_HYEGSTVPEKK_2	-1	2213.4	10405_HYEGSTVPEKK_2	0	HYEGSTVPEKK	y8/-0.004	HYEGSTVPEKK	2	10405_HYEGSTVPEKK_2	1/P00738	1	y	8	light
1/P00738	637.822	774.342	-31.7	101181_b7_1_HYEGSTVPEKK_2	-1	3950	10405_HYEGSTVPEKK_2	0	HYEGSTVPEKK	b7/-0.004	HYEGSTVPEKK	2	10405_HYEGSTVPEKK_2	1/P00738	1	b	7	light
1/P00738	637.822	974.515	-31.7	101183_y9_1_HYEGSTVPEKK_2	-1	5462.5	10405_HYEGSTVPEKK_2	0	HYEGSTVPEKK	y9/0.003	HYEGSTVPEKK	2	10405_HYEGSTVPEKK_2	1/P00738	1	y	9	light
1/P00738	425.551	774.342	-30.9	101195_b7_1_HYEGSTVPEKK_3	-1	960	10406_HYEGSTVPEKK_3	0	HYEGSTVPEKK	b7/0.008	HYEGSTVPEKK	3	10406_HYEGSTVPEKK_3	1/P00738	1	b	7	light
1/P00738	425.551	675.273	-30.9	101193_b6_1_HYEGSTVPEKK_3	-1	3962.2	10406_HYEGSTVPEKK_3	0	HYEGSTVPEKK	b6/-0.001	HYEGSTVPEKK	3	10406_HYEGSTVPEKK_3	1/P00738	1	b	6	light
1/P00738	425.551	501.303	-30.9	101190_y4_1_HYEGSTVPEKK_3	-1	10000	10406_HYEGSTVPEKK_3	0	HYEGSTVPEKK	y4/0.001	HYEGSTVPEKK	3	10406_HYEGSTVPEKK_3	1/P00738	1	y	4	light
1/P00738	425.551	430.172	-30.9	101188_b3_1_HYEGSTVPEKK_3	-1	554.3	10406_HYEGSTVPEKK_3	0	HYEGSTVPEKK	b3/0.001	HYEGSTVPEKK	3	10406_HYEGSTVPEKK_3	1/P00738	1	b	3	light
1/P00738	425.551	574.226	-30.9	101191_b5_1_HYEGSTVPEKK_3	-1	783.5	10406_HYEGSTVPEKK_3	0	HYEGSTVPEKK	b5/0.001	HYEGSTVPEKK	3	10406_HYEGSTVPEKK_3	1/P00738	1	b	5	light
1/P00738	425.551	487.194	-30.9	101189_b4_1_HYEGSTVPEKK_3	-1	903.9	10406_HYEGSTVPEKK_3	0	HYEGSTVPEKK	b4/0.001	HYEGSTVPEKK	3	10406_HYEGSTVPEKK_3	1/P00738	1	b	4	light
1/Q13085	689.134	712.46	104.2	1452800_y6_1_IPVQAVWAGWGHASENPKLPELLLK_4	-1	3575.8	104129_IPVQAVWAGWGHASENPKLPELLLK_4	0	IPVQAVWAGWGHASENPKLPELLLK	y6/0.003	IPVQAVWAGWGHASENPKLPELLLK	4	104129_IPVQAVWAGWGHASENPKLPELLLK_4	1/Q13085	1	y	6	light
1/Q13085	689.134	486.365	104.2	1452797_y4_1_IPVQAVWAGWGHASENPKLPELLLK_4	-1	1211	104129_IPVQAVWAGWGHASENPKLPELLLK_4	0	IPVQAVWAGWGHASENPKLPELLLK	y4/-0.003	IPVQAVWAGWGHASENPKLPELLLK	4	104129_IPVQAVWAGWGHASENPKLPELLLK_4	1/Q13085	1	y	4	light
1/Q13085	689.134	825.544	104.2	1452803_y7_1_IPVQAVWAGWGHASENPKLPELLLK_4	-1	1204.9	104129_IPVQAVWAGWGHASENPKLPELLLK_4	0	IPVQAVWAGWGHASENPKLPELLLK	y7/-0.007	IPVQAVWAGWGHASENPKLPELLLK	4	104129_IPVQAVWAGWGHASENPKLPELLLK_4	1/Q13085	1	y	7	light
1/Q13085	689.134	980.536	104.2	1452806_y18_2_IPVQAVWAGWGHASENPKLPELLLK_4	-1	1151.9	104129_IPVQAVWAGWGHASENPKLPELLLK_4	0	IPVQAVWAGWGHASENPKLPELLLK	y18^2/-0.010	IPVQAVWAGWGHASENPKLPELLLK	4	104129_IPVQAVWAGWGHASENPKLPELLLK_4	1/Q13085	2	y	18	light
1/Q13085	689.134	608.377	104.2	1452799_b6_1_IPVQAVWAGWGHASENPKLPELLLK_4	-1	1144.8	104129_IPVQAVWAGWGHASENPKLPELLLK_4	0	IPVQAVWAGWGHASENPKLPELLLK	b6/0.004	IPVQAVWAGWGHASENPKLPELLLK	4	104129_IPVQAVWAGWGHASENPKLPELLLK_4	1/Q13085	1	b	6	light
1/Q13085	689.134	945.018	104.2	1452805_y17_2_IPVQAVWAGWGHASENPKLPELLLK_4	-1	1124.7	104129_IPVQAVWAGWGHASENPKLPELLLK_4	0	IPVQAVWAGWGHASENPKLPELLLK	y17^2/-0.002	IPVQAVWAGWGHASENPKLPELLLK	4	104129_IPVQAVWAGWGHASENPKLPELLLK_4	1/Q13085	2	y	17	light
1/Q6YHK3	472.302	733.461	56.1	1452825_y6_1_IPVQLVFK_2	-1	1634.4	104131_IPVQLVFK_2	0	IPVQLVFK	y6/-0.001	IPVQLVFK	2	104131_IPVQLVFK_2	1/Q6YHK3	1	y	6	light
1/Q6YHK3	472.302	415.76	56.1	1452820_y7_2_IPVQLVFK_2	-1	3595.9	104131_IPVQLVFK_2	0	IPVQLVFK	y7^2/0.000	IPVQLVFK	2	104131_IPVQLVFK_2	1/Q6YHK3	2	y	7	light
1/Q6YHK3	472.302	830.513	56.1	1452827_y7_1_IPVQLVFK_2	-1	1895.3	104131_IPVQLVFK_2	0	IPVQLVFK	y7/0.001	IPVQLVFK	2	104131_IPVQLVFK_2	1/Q6YHK3	1	y	7	light
1/Q6YHK3	472.302	438.271	56.1	1452821_b4_1_IPVQLVFK_2	-1	815.8	104131_IPVQLVFK_2	0	IPVQLVFK	b4/-0.001,m2:5/-0.001	IPVQLVFK	2	104131_IPVQLVFK_2	1/Q6YHK3	1	b	4	light
1/Q6YHK3	472.302	393.25	56.1	1452819_y3_1_IPVQLVFK_2	-1	457.2	104131_IPVQLVFK_2	0	IPVQLVFK	y3/-0.003,b4-45/-0.003,y7-45^2/-0.003	IPVQLVFK	2	104131_IPVQLVFK_2	1/Q6YHK3	1	y	3	light
1/Q6YHK3	472.302	634.392	56.1	1452823_y5_1_IPVQLVFK_2	-1	978.8	104131_IPVQLVFK_2	0	IPVQLVFK	y5/0.000	IPVQLVFK	2	104131_IPVQLVFK_2	1/Q6YHK3	1	y	5	light
1/O95372	458.27	505.28	31.1	1452960_y4_1_IPVTLNMK_2	-1	1659.8	104141_IPVTLNMK_2	0	IPVTLNMK	y4/0.005	IPVTLNMK	2	104141_IPVTLNMK_2	1/O95372	1	y	4	light
1/O95372	458.27	606.328	31.1	1452961_y5_1_IPVTLNMK_2	-1	10000	104141_IPVTLNMK_2	0	IPVTLNMK	y5/0.008	IPVTLNMK	2	104141_IPVTLNMK_2	1/O95372	1	y	5	light
1/O95372	458.27	401.728	31.1	1452958_y7_2_IPVTLNMK_2	-1	2909.4	104141_IPVTLNMK_2	0	IPVTLNMK	y7^2/0.006	IPVTLNMK	2	104141_IPVTLNMK_2	1/O95372	2	y	7	light
1/O95372	458.27	802.449	31.1	1452963_y7_1_IPVTLNMK_2	-1	7195	104141_IPVTLNMK_2	0	IPVTLNMK	y7/0.017	IPVTLNMK	2	104141_IPVTLNMK_2	1/O95372	1	y	7	light
1/O95372	458.27	392.196	31.1	1452957_y3_1_IPVTLNMK_2	-1	2510.2	104141_IPVTLNMK_2	0	IPVTLNMK	y3/0.002	IPVTLNMK	2	104141_IPVTLNMK_2	1/O95372	1	y	3	light
1/O95372	458.27	705.396	31.1	1452962_y6_1_IPVTLNMK_2	-1	8153.7	104141_IPVTLNMK_2	0	IPVTLNMK	y6/0.013	IPVTLNMK	2	104141_IPVTLNMK_2	1/O95372	1	y	6	light
1/O95372	466.268	409.726	6.8	1452965_y7_2_IPVTLNM(UniMod:35)K_2	-1	1265.1	104142_IPVTLNM(UniMod:35)K_2	0	IPVTLNMK	y7^2/0.007	IPVTLNM(UniMod:35)K	2	104142_IPVTLNM(UniMod:35)K_2	1/O95372	2	y	7	light
1/O95372	466.268	408.191	6.8	1452964_y3_1_IPVTLNM(UniMod:35)K_2	-1	2006.7	104142_IPVTLNM(UniMod:35)K_2	0	IPVTLNMK	y3/0.001	IPVTLNM(UniMod:35)K	2	104142_IPVTLNM(UniMod:35)K_2	1/O95372	1	y	3	light
1/O95372	466.268	411.26	6.8	1452966_b4_1_IPVTLNM(UniMod:35)K_2	-1	669.2	104142_IPVTLNM(UniMod:35)K_2	0	IPVTLNMK	b4/0.004	IPVTLNM(UniMod:35)K	2	104142_IPVTLNM(UniMod:35)K_2	1/O95372	1	b	4	light
1/O95372	466.268	622.323	6.8	1452968_y5_1_IPVTLNM(UniMod:35)K_2	-1	8123.3	104142_IPVTLNM(UniMod:35)K_2	0	IPVTLNMK	y5/0.012	IPVTLNM(UniMod:35)K	2	104142_IPVTLNM(UniMod:35)K_2	1/O95372	1	y	5	light
1/O95372	466.268	521.275	6.8	1452967_y4_1_IPVTLNM(UniMod:35)K_2	-1	1521.1	104142_IPVTLNM(UniMod:35)K_2	0	IPVTLNMK	y4/0.009	IPVTLNM(UniMod:35)K	2	104142_IPVTLNM(UniMod:35)K_2	1/O95372	1	y	4	light
1/O95372	466.268	721.391	6.8	1452969_y6_1_IPVTLNM(UniMod:35)K_2	-1	5323.3	104142_IPVTLNM(UniMod:35)K_2	0	IPVTLNMK	y6/0.016,b7-64/-0.017	IPVTLNM(UniMod:35)K	2	104142_IPVTLNM(UniMod:35)K_2	1/O95372	1	y	6	light
1/P08582	736.706	376.219	63.1	1453616_y4_1_IQAEQVDAVTLSGEDIYTAGK_3	-1	4636.5	104188_IQAEQVDAVTLSGEDIYTAGK_3	0	IQAEQVDAVTLSGEDIYTAGK	y4/0.002	IQAEQVDAVTLSGEDIYTAGK	3	104188_IQAEQVDAVTLSGEDIYTAGK_3	1/P08582	1	y	4	light
1/P08582	736.706	539.282	63.1	1453621_y5_1_IQAEQVDAVTLSGEDIYTAGK_3	-1	3291.7	104188_IQAEQVDAVTLSGEDIYTAGK_3	0	IQAEQVDAVTLSGEDIYTAGK	y5/-0.006	IQAEQVDAVTLSGEDIYTAGK	3	104188_IQAEQVDAVTLSGEDIYTAGK_3	1/P08582	1	y	5	light
1/P08582	736.706	953.457	63.1	1453631_y9_1_IQAEQVDAVTLSGEDIYTAGK_3	-1	5995.9	104188_IQAEQVDAVTLSGEDIYTAGK_3	0	IQAEQVDAVTLSGEDIYTAGK	y9/-0.008	IQAEQVDAVTLSGEDIYTAGK	3	104188_IQAEQVDAVTLSGEDIYTAGK_3	1/P08582	1	y	9	light
1/P08582	736.706	1040.49	63.1	1453633_y10_1_IQAEQVDAVTLSGEDIYTAGK_3	-1	6822.9	104188_IQAEQVDAVTLSGEDIYTAGK_3	0	IQAEQVDAVTLSGEDIYTAGK	y10/0.012,b20+18^2/-0.006	IQAEQVDAVTLSGEDIYTAGK	3	104188_IQAEQVDAVTLSGEDIYTAGK_3	1/P08582	1	y	10	light
1/P08582	736.706	855.421	63.1	1453629_b8_1_IQAEQVDAVTLSGEDIYTAGK_3	-1	3588.7	104188_IQAEQVDAVTLSGEDIYTAGK_3	0	IQAEQVDAVTLSGEDIYTAGK	b8/0.010	IQAEQVDAVTLSGEDIYTAGK	3	104188_IQAEQVDAVTLSGEDIYTAGK_3	1/P08582	1	b	8	light
1/P08582	736.706	570.288	63.1	1453623_b5_1_IQAEQVDAVTLSGEDIYTAGK_3	-1	3326.6	104188_IQAEQVDAVTLSGEDIYTAGK_3	0	IQAEQVDAVTLSGEDIYTAGK	b5/-0.006	IQAEQVDAVTLSGEDIYTAGK	3	104188_IQAEQVDAVTLSGEDIYTAGK_3	1/P08582	1	b	5	light
1/Q12805	856.601	744.321	32.3	1454513_y6_1_IQC(UniMod:4)AAGYEQSEHNVC(UniMod:4)QDIDEC(UniMod:4)TAGTHNC(UniMod:4)R_4	-1	5786.1	104252_IQC(UniMod:4)AAGYEQSEHNVC(UniMod:4)QDIDEC(UniMod:4)TAGTHNC(UniMod:4)R_4	0	IQCAAGYEQSEHNVCQDIDECTAGTHNCR	y6/-0.006	IQC(UniMod:4)AAGYEQSEHNVC(UniMod:4)QDIDEC(UniMod:4)TAGTHNC(UniMod:4)R	4	104252_IQC(UniMod:4)AAGYEQSEHNVC(UniMod:4)QDIDEC(UniMod:4)TAGTHNC(UniMod:4)R_4	1/Q12805	1	y	6	light
1/Q12805	856.601	815.358	32.3	1454514_y7_1_IQC(UniMod:4)AAGYEQSEHNVC(UniMod:4)QDIDEC(UniMod:4)TAGTHNC(UniMod:4)R_4	-1	4322.5	104252_IQC(UniMod:4)AAGYEQSEHNVC(UniMod:4)QDIDEC(UniMod:4)TAGTHNC(UniMod:4)R_4	0	IQCAAGYEQSEHNVCQDIDECTAGTHNCR	y7/-0.005	IQC(UniMod:4)AAGYEQSEHNVC(UniMod:4)QDIDEC(UniMod:4)TAGTHNC(UniMod:4)R	4	104252_IQC(UniMod:4)AAGYEQSEHNVC(UniMod:4)QDIDEC(UniMod:4)TAGTHNC(UniMod:4)R_4	1/Q12805	1	y	7	light
1/Q12805	856.601	449.193	32.3	1454508_y3_1_IQC(UniMod:4)AAGYEQSEHNVC(UniMod:4)QDIDEC(UniMod:4)TAGTHNC(UniMod:4)R_4	-1	3190.9	104252_IQC(UniMod:4)AAGYEQSEHNVC(UniMod:4)QDIDEC(UniMod:4)TAGTHNC(UniMod:4)R_4	0	IQCAAGYEQSEHNVCQDIDECTAGTHNCR	y3/-0.000	IQC(UniMod:4)AAGYEQSEHNVC(UniMod:4)QDIDEC(UniMod:4)TAGTHNC(UniMod:4)R	4	104252_IQC(UniMod:4)AAGYEQSEHNVC(UniMod:4)QDIDEC(UniMod:4)TAGTHNC(UniMod:4)R_4	1/Q12805	1	y	3	light
1/Q12805	856.601	1320.51	32.3	1454518_y11_1_IQC(UniMod:4)AAGYEQSEHNVC(UniMod:4)QDIDEC(UniMod:4)TAGTHNC(UniMod:4)R_4	-1	3238.3	104252_IQC(UniMod:4)AAGYEQSEHNVC(UniMod:4)QDIDEC(UniMod:4)TAGTHNC(UniMod:4)R_4	0	IQCAAGYEQSEHNVCQDIDECTAGTHNCR	y11/-0.013	IQC(UniMod:4)AAGYEQSEHNVC(UniMod:4)QDIDEC(UniMod:4)TAGTHNC(UniMod:4)R	4	104252_IQC(UniMod:4)AAGYEQSEHNVC(UniMod:4)QDIDEC(UniMod:4)TAGTHNC(UniMod:4)R_4	1/Q12805	1	y	11	light
1/Q12805	856.601	916.405	32.3	1454515_y8_1_IQC(UniMod:4)AAGYEQSEHNVC(UniMod:4)QDIDEC(UniMod:4)TAGTHNC(UniMod:4)R_4	-1	3483.7	104252_IQC(UniMod:4)AAGYEQSEHNVC(UniMod:4)QDIDEC(UniMod:4)TAGTHNC(UniMod:4)R_4	0	IQCAAGYEQSEHNVCQDIDECTAGTHNCR	y8/-0.001,b16-44^2/0.009	IQC(UniMod:4)AAGYEQSEHNVC(UniMod:4)QDIDEC(UniMod:4)TAGTHNC(UniMod:4)R	4	104252_IQC(UniMod:4)AAGYEQSEHNVC(UniMod:4)QDIDEC(UniMod:4)TAGTHNC(UniMod:4)R_4	1/Q12805	1	y	8	light
1/Q12805	856.601	586.251	32.3	1454511_y4_1_IQC(UniMod:4)AAGYEQSEHNVC(UniMod:4)QDIDEC(UniMod:4)TAGTHNC(UniMod:4)R_4	-1	3088.9	104252_IQC(UniMod:4)AAGYEQSEHNVC(UniMod:4)QDIDEC(UniMod:4)TAGTHNC(UniMod:4)R_4	0	IQCAAGYEQSEHNVCQDIDECTAGTHNCR	y4/0.001	IQC(UniMod:4)AAGYEQSEHNVC(UniMod:4)QDIDEC(UniMod:4)TAGTHNC(UniMod:4)R	4	104252_IQC(UniMod:4)AAGYEQSEHNVC(UniMod:4)QDIDEC(UniMod:4)TAGTHNC(UniMod:4)R_4	1/Q12805	1	y	4	light
1/P00734	998.028	793.457	69.2	1597380_LAVTTHGLPC(UniMod:4)LAWASAQAK_2	-1	5280.2	104252_LAVTTHGLPC(UniMod:4)LAWASAQAK_2	0	LAVTTHGLPCLAWASAQAK	b8/-0.003	LAVTTHGLPC(UniMod:4)LAWASAQAK	2	104252_LAVTTHGLPC(UniMod:4)LAWASAQAK_2	1/P00734	1	b	-1	light
1/P00734	998.028	1234.66	69.2	1597387_LAVTTHGLPC(UniMod:4)LAWASAQAK_2	-1	2122.6	104252_LAVTTHGLPC(UniMod:4)LAWASAQAK_2	0	LAVTTHGLPCLAWASAQAK	b12/-0.001	LAVTTHGLPC(UniMod:4)LAWASAQAK	2	104252_LAVTTHGLPC(UniMod:4)LAWASAQAK_2	1/P00734	1	b	-1	light
1/P00734	998.028	680.373	69.2	1597377_LAVTTHGLPC(UniMod:4)LAWASAQAK_2	-1	2787.2	104252_LAVTTHGLPC(UniMod:4)LAWASAQAK_2	0	LAVTTHGLPCLAWASAQAK	b7/0.003,m2:8/0.003	LAVTTHGLPC(UniMod:4)LAWASAQAK	2	104252_LAVTTHGLPC(UniMod:4)LAWASAQAK_2	1/P00734	1	b	-1	light
1/P00734	998.028	1202.6	69.2	1597386_LAVTTHGLPC(UniMod:4)LAWASAQAK_2	-1	6253	104252_LAVTTHGLPC(UniMod:4)LAWASAQAK_2	0	LAVTTHGLPCLAWASAQAK	y11/-0.011	LAVTTHGLPC(UniMod:4)LAWASAQAK	2	104252_LAVTTHGLPC(UniMod:4)LAWASAQAK_2	1/P00734	1	y	-1	light
1/P00734	998.028	575.315	69.2	1597374_LAVTTHGLPC(UniMod:4)LAWASAQAK_2	-1	2242.7	104252_LAVTTHGLPC(UniMod:4)LAWASAQAK_2	0	LAVTTHGLPCLAWASAQAK	y6/-0.006	LAVTTHGLPC(UniMod:4)LAWASAQAK	2	104252_LAVTTHGLPC(UniMod:4)LAWASAQAK_2	1/P00734	1	y	-1	light
1/P00734	998.028	504.278	69.2	1597372_LAVTTHGLPC(UniMod:4)LAWASAQAK_2	-1	2056.3	104252_LAVTTHGLPC(UniMod:4)LAWASAQAK_2	0	LAVTTHGLPCLAWASAQAK	y5/0.003	LAVTTHGLPC(UniMod:4)LAWASAQAK	2	104252_LAVTTHGLPC(UniMod:4)LAWASAQAK_2	1/P00734	1	y	-1	light
1/P00734	665.688	601.803	69.8	1597401_LAVTTHGLPC(UniMod:4)LAWASAQAK_3	-1	3612.1	104253_LAVTTHGLPC(UniMod:4)LAWASAQAK_3	0	LAVTTHGLPCLAWASAQAK	y11^2/0.002	LAVTTHGLPC(UniMod:4)LAWASAQAK	3	104253_LAVTTHGLPC(UniMod:4)LAWASAQAK_3	1/P00734	2	y	-1	light
1/P00734	665.688	575.315	69.8	1597399_LAVTTHGLPC(UniMod:4)LAWASAQAK_3	-1	9275.4	104253_LAVTTHGLPC(UniMod:4)LAWASAQAK_3	0	LAVTTHGLPCLAWASAQAK	y6/0.001	LAVTTHGLPC(UniMod:4)LAWASAQAK	3	104253_LAVTTHGLPC(UniMod:4)LAWASAQAK_3	1/P00734	1	y	-1	light
1/P00734	665.688	832.431	69.8	1597412_LAVTTHGLPC(UniMod:4)LAWASAQAK_3	-1	5207.2	104253_LAVTTHGLPC(UniMod:4)LAWASAQAK_3	0	LAVTTHGLPCLAWASAQAK	y8/-0.000	LAVTTHGLPC(UniMod:4)LAWASAQAK	3	104253_LAVTTHGLPC(UniMod:4)LAWASAQAK_3	1/P00734	1	y	-1	light
1/P00734	665.688	761.394	69.8	1597408_LAVTTHGLPC(UniMod:4)LAWASAQAK_3	-1	10000	104253_LAVTTHGLPC(UniMod:4)LAWASAQAK_3	0	LAVTTHGLPCLAWASAQAK	y7/-0.000	LAVTTHGLPC(UniMod:4)LAWASAQAK	3	104253_LAVTTHGLPC(UniMod:4)LAWASAQAK_3	1/P00734	1	y	-1	light
1/P00734	665.688	504.278	69.8	1597395_LAVTTHGLPC(UniMod:4)LAWASAQAK_3	-1	5831.8	104253_LAVTTHGLPC(UniMod:4)LAWASAQAK_3	0	LAVTTHGLPCLAWASAQAK	y5/0.000	LAVTTHGLPC(UniMod:4)LAWASAQAK	3	104253_LAVTTHGLPC(UniMod:4)LAWASAQAK_3	1/P00734	1	y	-1	light
1/P00734	665.688	793.457	69.8	1597411_LAVTTHGLPC(UniMod:4)LAWASAQAK_3	-1	8629.9	104253_LAVTTHGLPC(UniMod:4)LAWASAQAK_3	0	LAVTTHGLPCLAWASAQAK	b8/-0.001	LAVTTHGLPC(UniMod:4)LAWASAQAK	3	104253_LAVTTHGLPC(UniMod:4)LAWASAQAK_3	1/P00734	1	b	-1	light
1/P02787	989.26	454.23	136.5	10579_y4_1_AIAANEADAVTLDAGLVYDAYLAPNNLKPVVAEFYGSK_4	-1	3629.4	1043_AIAANEADAVTLDAGLVYDAYLAPNNLKPVVAEFYGSK_4	0	AIAANEADAVTLDAGLVYDAYLAPNNLKPVVAEFYGSK	y4/0.006	AIAANEADAVTLDAGLVYDAYLAPNNLKPVVAEFYGSK	4	1043_AIAANEADAVTLDAGLVYDAYLAPNNLKPVVAEFYGSK_4	1/P02787	1	y	4	light
1/P02787	989.26	692.341	136.5	10582_b15_2_AIAANEADAVTLDAGLVYDAYLAPNNLKPVVAEFYGSK_4	-1	3281.5	1043_AIAANEADAVTLDAGLVYDAYLAPNNLKPVVAEFYGSK_4	0	AIAANEADAVTLDAGLVYDAYLAPNNLKPVVAEFYGSK	b15^2/-0.005	AIAANEADAVTLDAGLVYDAYLAPNNLKPVVAEFYGSK	4	1043_AIAANEADAVTLDAGLVYDAYLAPNNLKPVVAEFYGSK_4	1/P02787	2	b	15	light
1/P02787	989.26	1662.88	136.5	10595_y15_1_AIAANEADAVTLDAGLVYDAYLAPNNLKPVVAEFYGSK_4	-1	4133.7	1043_AIAANEADAVTLDAGLVYDAYLAPNNLKPVVAEFYGSK_4	0	AIAANEADAVTLDAGLVYDAYLAPNNLKPVVAEFYGSK	y15/-0.015	AIAANEADAVTLDAGLVYDAYLAPNNLKPVVAEFYGSK	4	1043_AIAANEADAVTLDAGLVYDAYLAPNNLKPVVAEFYGSK_4	1/P02787	1	y	15	light
1/P02787	989.26	926.458	136.5	10589_b10_1_AIAANEADAVTLDAGLVYDAYLAPNNLKPVVAEFYGSK_4	-1	4140.6	1043_AIAANEADAVTLDAGLVYDAYLAPNNLKPVVAEFYGSK_4	0	AIAANEADAVTLDAGLVYDAYLAPNNLKPVVAEFYGSK	b10/-0.004,b36-18^4/-0.019	AIAANEADAVTLDAGLVYDAYLAPNNLKPVVAEFYGSK	4	1043_AIAANEADAVTLDAGLVYDAYLAPNNLKPVVAEFYGSK_4	1/P02787	1	b	10	light
1/P02787	989.26	1096.57	136.5	10592_y10_1_AIAANEADAVTLDAGLVYDAYLAPNNLKPVVAEFYGSK_4	-1	10000	1043_AIAANEADAVTLDAGLVYDAYLAPNNLKPVVAEFYGSK_4	0	AIAANEADAVTLDAGLVYDAYLAPNNLKPVVAEFYGSK	y10/0.006	AIAANEADAVTLDAGLVYDAYLAPNNLKPVVAEFYGSK	4	1043_AIAANEADAVTLDAGLVYDAYLAPNNLKPVVAEFYGSK_4	1/P02787	1	y	10	light
1/P02787	989.26	867.465	136.5	10586_y16_2_AIAANEADAVTLDAGLVYDAYLAPNNLKPVVAEFYGSK_4	-1	4326.1	1043_AIAANEADAVTLDAGLVYDAYLAPNNLKPVVAEFYGSK_4	0	AIAANEADAVTLDAGLVYDAYLAPNNLKPVVAEFYGSK	y16^2/0.001	AIAANEADAVTLDAGLVYDAYLAPNNLKPVVAEFYGSK	4	1043_AIAANEADAVTLDAGLVYDAYLAPNNLKPVVAEFYGSK_4	1/P02787	2	y	16	light
1/P27487	749.39	865.441	66.3	1598779_LAYVWNNDIYVK_2	-1	3198.4	104343_LAYVWNNDIYVK_2	0	LAYVWNNDIYVK	y7/-0.004	LAYVWNNDIYVK	2	104343_LAYVWNNDIYVK_2	1/P27487	1	y	-1	light
1/P27487	749.39	1051.52	66.3	1598781_LAYVWNNDIYVK_2	-1	7934.5	104343_LAYVWNNDIYVK_2	0	LAYVWNNDIYVK	y8/-0.004	LAYVWNNDIYVK	2	104343_LAYVWNNDIYVK_2	1/P27487	1	y	-1	light
1/P27487	749.39	447.26	66.3	1598772_LAYVWNNDIYVK_2	-1	1666.1	104343_LAYVWNNDIYVK_2	0	LAYVWNNDIYVK	b4/-0.000	LAYVWNNDIYVK	2	104343_LAYVWNNDIYVK_2	1/P27487	1	b	-1	light
1/P27487	749.39	409.245	66.3	1598771_LAYVWNNDIYVK_2	-1	2421.7	104343_LAYVWNNDIYVK_2	0	LAYVWNNDIYVK	y3/0.000	LAYVWNNDIYVK	2	104343_LAYVWNNDIYVK_2	1/P27487	1	y	-1	light
1/P27487	749.39	1150.59	66.3	1598784_LAYVWNNDIYVK_2	-1	2542.1	104343_LAYVWNNDIYVK_2	0	LAYVWNNDIYVK	y9/-0.007	LAYVWNNDIYVK	2	104343_LAYVWNNDIYVK_2	1/P27487	1	y	-1	light
1/P27487	749.39	522.329	66.3	1598773_LAYVWNNDIYVK_2	-1	1282.6	104343_LAYVWNNDIYVK_2	0	LAYVWNNDIYVK	y4/-0.000	LAYVWNNDIYVK	2	104343_LAYVWNNDIYVK_2	1/P27487	1	y	-1	light
1/P27487	856.448	975.489	94.6	1598793_LAYVWNNDIYVKIEPNLPSYR_3	-1	2247.4	104344_LAYVWNNDIYVKIEPNLPSYR_3	0	LAYVWNNDIYVKIEPNLPSYR	y8/-0.002	LAYVWNNDIYVKIEPNLPSYR	3	104344_LAYVWNNDIYVKIEPNLPSYR_3	1/P27487	1	y	-1	light
1/P27487	856.448	1088.57	94.6	1598797_LAYVWNNDIYVKIEPNLPSYR_3	-1	2434.9	104344_LAYVWNNDIYVKIEPNLPSYR_3	0	LAYVWNNDIYVKIEPNLPSYR	y9/0.007,y18-44^2/-0.001	LAYVWNNDIYVKIEPNLPSYR	3	104344_LAYVWNNDIYVKIEPNLPSYR_3	1/P27487	1	y	-1	light
1/P27487	856.448	1216.67	94.6	1598801_LAYVWNNDIYVKIEPNLPSYR_3	-1	2121.5	104344_LAYVWNNDIYVKIEPNLPSYR_3	0	LAYVWNNDIYVKIEPNLPSYR	[y10/0.016]	LAYVWNNDIYVKIEPNLPSYR	3	104344_LAYVWNNDIYVKIEPNLPSYR_3	1/P27487	1	y	-1	light
1/P27487	856.448	522.267	94.6	1598788_LAYVWNNDIYVKIEPNLPSYR_3	-1	2097.6	104344_LAYVWNNDIYVKIEPNLPSYR_3	0	LAYVWNNDIYVKIEPNLPSYR	y4/0.004,b9-46^2/0.002,y9-45^2/-0.008	LAYVWNNDIYVKIEPNLPSYR	3	104344_LAYVWNNDIYVKIEPNLPSYR_3	1/P27487	1	y	-1	light
1/P27487	856.448	1061.04	94.6	1598796_LAYVWNNDIYVKIEPNLPSYR_3	-1	1724.1	104344_LAYVWNNDIYVKIEPNLPSYR_3	0	LAYVWNNDIYVKIEPNLPSYR	y17^2/-0.014	LAYVWNNDIYVKIEPNLPSYR	3	104344_LAYVWNNDIYVKIEPNLPSYR_3	1/P27487	2	y	-1	light
1/P27487	856.448	846.447	94.6	1598791_LAYVWNNDIYVKIEPNLPSYR_3	-1	5014.7	104344_LAYVWNNDIYVKIEPNLPSYR_3	0	LAYVWNNDIYVKIEPNLPSYR	y7/0.006,m7:13/-0.019	LAYVWNNDIYVKIEPNLPSYR	3	104344_LAYVWNNDIYVKIEPNLPSYR_3	1/P27487	1	y	-1	light
1/Q12884	751.406	1317.68	54.1	1598815_LAYVYQNNIYLK_2	-1	937	104345_LAYVYQNNIYLK_2	0	LAYVYQNNIYLK	y10/0.001	LAYVYQNNIYLK	2	104345_LAYVYQNNIYLK_2	1/Q12884	1	y	-1	light
1/Q12884	751.406	892.489	54.1	1598811_LAYVYQNNIYLK_2	-1	1351.8	104345_LAYVYQNNIYLK_2	0	LAYVYQNNIYLK	y7/0.003	LAYVYQNNIYLK	2	104345_LAYVYQNNIYLK_2	1/Q12884	1	y	-1	light
1/Q12884	751.406	423.26	54.1	1598804_LAYVYQNNIYLK_2	-1	1849.1	104345_LAYVYQNNIYLK_2	0	LAYVYQNNIYLK	y3/-0.001	LAYVYQNNIYLK	2	104345_LAYVYQNNIYLK_2	1/Q12884	1	y	-1	light
1/Q12884	751.406	1055.55	54.1	1598812_LAYVYQNNIYLK_2	-1	3579.1	104345_LAYVYQNNIYLK_2	0	LAYVYQNNIYLK	y8/0.012	LAYVYQNNIYLK	2	104345_LAYVYQNNIYLK_2	1/Q12884	1	y	-1	light
1/Q12884	751.406	1154.62	54.1	1598813_LAYVYQNNIYLK_2	-1	1056.1	104345_LAYVYQNNIYLK_2	0	LAYVYQNNIYLK	y9/-0.007	LAYVYQNNIYLK	2	104345_LAYVYQNNIYLK_2	1/Q12884	1	y	-1	light
1/Q12884	751.406	764.43	54.1	1598809_LAYVYQNNIYLK_2	-1	1182.8	104345_LAYVYQNNIYLK_2	0	LAYVYQNNIYLK	y6/-0.016	LAYVYQNNIYLK	2	104345_LAYVYQNNIYLK_2	1/Q12884	1	y	-1	light
1/P02788	475.224	418.682	-31.7	1599050_LC(UniMod:4)AGTGENK_2	-1	1200.7	104361_LC(UniMod:4)AGTGENK_2	0	LCAGTGENK	y8^2/0.003	LC(UniMod:4)AGTGENK	2	104361_LC(UniMod:4)AGTGENK_2	1/P02788	2	y	-1	light
1/P02788	475.224	548.267	-31.7	1599053_LC(UniMod:4)AGTGENK_2	-1	1007.3	104361_LC(UniMod:4)AGTGENK_2	0	LCAGTGENK	y5/-0.002	LC(UniMod:4)AGTGENK	2	104361_LC(UniMod:4)AGTGENK_2	1/P02788	1	y	-1	light
1/P02788	475.224	447.22	-31.7	1599051_LC(UniMod:4)AGTGENK_2	-1	1294	104361_LC(UniMod:4)AGTGENK_2	0	LCAGTGENK	y4/-0.004	LC(UniMod:4)AGTGENK	2	104361_LC(UniMod:4)AGTGENK_2	1/P02788	1	y	-1	light
1/P02788	475.224	676.326	-31.7	1599055_LC(UniMod:4)AGTGENK_2	-1	9219	104361_LC(UniMod:4)AGTGENK_2	0	LCAGTGENK	y7/-0.002	LC(UniMod:4)AGTGENK	2	104361_LC(UniMod:4)AGTGENK_2	1/P02788	1	y	-1	light
1/P02788	475.224	836.357	-31.7	1599058_LC(UniMod:4)AGTGENK_2	-1	2776.4	104361_LC(UniMod:4)AGTGENK_2	0	LCAGTGENK	y8/0.003	LC(UniMod:4)AGTGENK	2	104361_LC(UniMod:4)AGTGENK_2	1/P02788	1	y	-1	light
1/P02788	475.224	605.289	-31.7	1599054_LC(UniMod:4)AGTGENK_2	-1	4161.5	104361_LC(UniMod:4)AGTGENK_2	0	LCAGTGENK	y6/-0.004	LC(UniMod:4)AGTGENK	2	104361_LC(UniMod:4)AGTGENK_2	1/P02788	1	y	-1	light
1/P02788	969.43	1166.55	63.3	1599075_LC(UniMod:4)AGTGENKC(UniMod:4)AFSSQEPYFSYSGAFK_3	-1	9467.5	104362_LC(UniMod:4)AGTGENKC(UniMod:4)AFSSQEPYFSYSGAFK_3	0	LCAGTGENKCAFSSQEPYFSYSGAFK	y10/-0.012	LC(UniMod:4)AGTGENKC(UniMod:4)AFSSQEPYFSYSGAFK	3	104362_LC(UniMod:4)AGTGENKC(UniMod:4)AFSSQEPYFSYSGAFK_3	1/P02788	1	y	-1	light
1/P02788	969.43	1295.59	63.3	1599076_LC(UniMod:4)AGTGENKC(UniMod:4)AFSSQEPYFSYSGAFK_3	-1	3110.2	104362_LC(UniMod:4)AGTGENKC(UniMod:4)AFSSQEPYFSYSGAFK_3	0	LCAGTGENKCAFSSQEPYFSYSGAFK	y11/0.018	LC(UniMod:4)AGTGENKC(UniMod:4)AFSSQEPYFSYSGAFK	3	104362_LC(UniMod:4)AGTGENKC(UniMod:4)AFSSQEPYFSYSGAFK_3	1/P02788	1	y	-1	light
1/P02788	969.43	1069.5	63.3	1599073_LC(UniMod:4)AGTGENKC(UniMod:4)AFSSQEPYFSYSGAFK_3	-1	3313.6	104362_LC(UniMod:4)AGTGENKC(UniMod:4)AFSSQEPYFSYSGAFK_3	0	LCAGTGENKCAFSSQEPYFSYSGAFK	y9/-0.008	LC(UniMod:4)AGTGENKC(UniMod:4)AFSSQEPYFSYSGAFK	3	104362_LC(UniMod:4)AGTGENKC(UniMod:4)AFSSQEPYFSYSGAFK_3	1/P02788	1	y	-1	light
1/P02788	969.43	906.436	63.3	1599071_LC(UniMod:4)AGTGENKC(UniMod:4)AFSSQEPYFSYSGAFK_3	-1	5473.4	104362_LC(UniMod:4)AGTGENKC(UniMod:4)AFSSQEPYFSYSGAFK_3	0	LCAGTGENKCAFSSQEPYFSYSGAFK	y8/0.003	LC(UniMod:4)AGTGENKC(UniMod:4)AFSSQEPYFSYSGAFK	3	104362_LC(UniMod:4)AGTGENKC(UniMod:4)AFSSQEPYFSYSGAFK_3	1/P02788	1	y	-1	light
1/P02788	969.43	1317.08	63.3	1599077_LC(UniMod:4)AGTGENKC(UniMod:4)AFSSQEPYFSYSGAFK_3	-1	2692.3	104362_LC(UniMod:4)AGTGENKC(UniMod:4)AFSSQEPYFSYSGAFK_3	0	LCAGTGENKCAFSSQEPYFSYSGAFK	y24^2/-0.019	LC(UniMod:4)AGTGENKC(UniMod:4)AFSSQEPYFSYSGAFK	3	104362_LC(UniMod:4)AGTGENKC(UniMod:4)AFSSQEPYFSYSGAFK_3	1/P02788	2	y	-1	light
1/P02788	969.43	509.272	63.3	1599064_LC(UniMod:4)AGTGENKC(UniMod:4)AFSSQEPYFSYSGAFK_3	-1	4467.5	104362_LC(UniMod:4)AGTGENKC(UniMod:4)AFSSQEPYFSYSGAFK_3	0	LCAGTGENKCAFSSQEPYFSYSGAFK	y5/0.000	LC(UniMod:4)AGTGENKC(UniMod:4)AFSSQEPYFSYSGAFK	3	104362_LC(UniMod:4)AGTGENKC(UniMod:4)AFSSQEPYFSYSGAFK_3	1/P02788	1	y	-1	light
1/O00748	636.309	901.426	3.8	1456520_y7_1_IQELEEPEER_2	-1	3998.4	104395_IQELEEPEER_2	0	IQELEEPEER	y7/0.011	IQELEEPEER	2	104395_IQELEEPEER_2	1/O00748	1	y	7	light
1/O00748	636.309	530.257	3.8	1456516_y4_1_IQELEEPEER_2	-1	5803.5	104395_IQELEEPEER_2	0	IQELEEPEER	y4/0.003	IQELEEPEER	2	104395_IQELEEPEER_2	1/O00748	1	y	4	light
1/O00748	636.309	659.299	3.8	1456517_y5_1_IQELEEPEER_2	-1	3142.9	104395_IQELEEPEER_2	0	IQELEEPEER	y5/0.007	IQELEEPEER	2	104395_IQELEEPEER_2	1/O00748	1	y	5	light
1/O00748	636.309	788.342	3.8	1456519_y6_1_IQELEEPEER_2	-1	3747.7	104395_IQELEEPEER_2	0	IQELEEPEER	y6/0.007	IQELEEPEER	2	104395_IQELEEPEER_2	1/O00748	1	y	6	light
1/O00748	636.309	1030.47	3.8	1456523_y8_1_IQELEEPEER_2	-1	10000	104395_IQELEEPEER_2	0	IQELEEPEER	y8/0.013	IQELEEPEER	2	104395_IQELEEPEER_2	1/O00748	1	y	8	light
1/O00748	636.309	371.193	3.8	1456514_b3_1_IQELEEPEER_2	-1	2953.6	104395_IQELEEPEER_2	0	IQELEEPEER	b3/0.001,m2:4/0.001	IQELEEPEER	2	104395_IQELEEPEER_2	1/O00748	1	b	3	light
1/O00748	584.62	819.884	20	1456538_y13_2_IQELEEPEERHTEL_3	-1	1327	104396_IQELEEPEERHTEL_3	0	IQELEEPEERHTEL	y13^2/0.008,b13+18^2/0.008	IQELEEPEERHTEL	3	104396_IQELEEPEERHTEL_3	1/O00748	2	y	13	light
1/O00748	584.62	505.749	20	1456528_y8_2_IQELEEPEERHTEL_3	-1	1113.1	104396_IQELEEPEERHTEL_3	0	IQELEEPEERHTEL	y8^2/-0.000	IQELEEPEERHTEL	3	104396_IQELEEPEERHTEL_3	1/O00748	2	y	8	light
1/O00748	584.62	371.193	20	1456525_b3_1_IQELEEPEERHTEL_3	-1	1010.5	104396_IQELEEPEERHTEL_3	0	IQELEEPEERHTEL	b3/-0.003,m2:4/-0.003	IQELEEPEERHTEL	3	104396_IQELEEPEERHTEL_3	1/O00748	1	b	3	light
1/O00748	584.62	1010.49	20	1456540_y8_1_IQELEEPEERHTEL_3	-1	3190.6	104396_IQELEEPEERHTEL_3	0	IQELEEPEERHTEL	y8/-0.010	IQELEEPEERHTEL	3	104396_IQELEEPEERHTEL_3	1/O00748	1	y	8	light
1/O00748	584.62	691.333	20	1456532_y11_2_IQELEEPEERHTEL_3	-1	1311.9	104396_IQELEEPEERHTEL_3	0	IQELEEPEERHTEL	y11^2/0.006	IQELEEPEERHTEL	3	104396_IQELEEPEERHTEL_3	1/O00748	2	y	11	light
1/O00748	584.62	755.855	20	1456533_y12_2_IQELEEPEERHTEL_3	-1	5316.7	104396_IQELEEPEERHTEL_3	0	IQELEEPEERHTEL	y12^2/0.004	IQELEEPEERHTEL	3	104396_IQELEEPEERHTEL_3	1/O00748	2	y	12	light
1/P02787	791.609	867.465	136.5	10603_y16_2_AIAANEADAVTLDAGLVYDAYLAPNNLKPVVAEFYGSK_5	-1	6905.2	1044_AIAANEADAVTLDAGLVYDAYLAPNNLKPVVAEFYGSK_5	0	AIAANEADAVTLDAGLVYDAYLAPNNLKPVVAEFYGSK	y16^2/-0.003	AIAANEADAVTLDAGLVYDAYLAPNNLKPVVAEFYGSK	5	1044_AIAANEADAVTLDAGLVYDAYLAPNNLKPVVAEFYGSK_5	1/P02787	2	y	16	light
1/P02787	791.609	756.352	136.5	10600_b8_1_AIAANEADAVTLDAGLVYDAYLAPNNLKPVVAEFYGSK_5	-1	2657.1	1044_AIAANEADAVTLDAGLVYDAYLAPNNLKPVVAEFYGSK_5	0	AIAANEADAVTLDAGLVYDAYLAPNNLKPVVAEFYGSK	b8/0.002,m2:9/0.002	AIAANEADAVTLDAGLVYDAYLAPNNLKPVVAEFYGSK	5	1044_AIAANEADAVTLDAGLVYDAYLAPNNLKPVVAEFYGSK_5	1/P02787	1	b	8	light
1/P02787	791.609	900.446	136.5	10604_y8_1_AIAANEADAVTLDAGLVYDAYLAPNNLKPVVAEFYGSK_5	-1	2546.2	1044_AIAANEADAVTLDAGLVYDAYLAPNNLKPVVAEFYGSK_5	0	AIAANEADAVTLDAGLVYDAYLAPNNLKPVVAEFYGSK	y8/-0.000	AIAANEADAVTLDAGLVYDAYLAPNNLKPVVAEFYGSK	5	1044_AIAANEADAVTLDAGLVYDAYLAPNNLKPVVAEFYGSK_5	1/P02787	1	y	8	light
1/P02787	791.609	570.288	136.5	10598_b6_1_AIAANEADAVTLDAGLVYDAYLAPNNLKPVVAEFYGSK_5	-1	2841.4	1044_AIAANEADAVTLDAGLVYDAYLAPNNLKPVVAEFYGSK_5	0	AIAANEADAVTLDAGLVYDAYLAPNNLKPVVAEFYGSK	b6/0.008	AIAANEADAVTLDAGLVYDAYLAPNNLKPVVAEFYGSK	5	1044_AIAANEADAVTLDAGLVYDAYLAPNNLKPVVAEFYGSK_5	1/P02787	1	b	6	light
1/P02787	791.609	831.946	136.5	10602_y15_2_AIAANEADAVTLDAGLVYDAYLAPNNLKPVVAEFYGSK_5	-1	4227.9	1044_AIAANEADAVTLDAGLVYDAYLAPNNLKPVVAEFYGSK_5	0	AIAANEADAVTLDAGLVYDAYLAPNNLKPVVAEFYGSK	y15^2/-0.003	AIAANEADAVTLDAGLVYDAYLAPNNLKPVVAEFYGSK	5	1044_AIAANEADAVTLDAGLVYDAYLAPNNLKPVVAEFYGSK_5	1/P02787	2	y	15	light
1/P02787	791.609	454.23	136.5	10597_y4_1_AIAANEADAVTLDAGLVYDAYLAPNNLKPVVAEFYGSK_5	-1	3427.4	1044_AIAANEADAVTLDAGLVYDAYLAPNNLKPVVAEFYGSK_5	0	AIAANEADAVTLDAGLVYDAYLAPNNLKPVVAEFYGSK	y4/-0.006	AIAANEADAVTLDAGLVYDAYLAPNNLKPVVAEFYGSK	5	1044_AIAANEADAVTLDAGLVYDAYLAPNNLKPVVAEFYGSK_5	1/P02787	1	y	4	light
1/P10643	732.634	557.312	96.1	101633_b5_1_IAC(UniMod:4)VLPVLMDGIQSHPQKPFYTVGEK_4	-1	3937.2	10444_IAC(UniMod:4)VLPVLMDGIQSHPQKPFYTVGEK_4	0	IACVLPVLMDGIQSHPQKPFYTVGEK	b5/-0.009	IAC(UniMod:4)VLPVLMDGIQSHPQKPFYTVGEK	4	10444_IAC(UniMod:4)VLPVLMDGIQSHPQKPFYTVGEK_4	1/P10643	1	b	5	light
1/P10643	732.634	753.433	96.1	101634_b7_1_IAC(UniMod:4)VLPVLMDGIQSHPQKPFYTVGEK_4	-1	1713.6	10444_IAC(UniMod:4)VLPVLMDGIQSHPQKPFYTVGEK_4	0	IACVLPVLMDGIQSHPQKPFYTVGEK	b7/0.002	IAC(UniMod:4)VLPVLMDGIQSHPQKPFYTVGEK	4	10444_IAC(UniMod:4)VLPVLMDGIQSHPQKPFYTVGEK_4	1/P10643	1	b	7	light
1/P10643	732.634	533.293	96.1	101632_y5_1_IAC(UniMod:4)VLPVLMDGIQSHPQKPFYTVGEK_4	-1	1570.8	10444_IAC(UniMod:4)VLPVLMDGIQSHPQKPFYTVGEK_4	0	IACVLPVLMDGIQSHPQKPFYTVGEK	y5/0.001	IAC(UniMod:4)VLPVLMDGIQSHPQKPFYTVGEK	4	10444_IAC(UniMod:4)VLPVLMDGIQSHPQKPFYTVGEK_4	1/P10643	1	y	5	light
1/P10643	732.634	444.228	96.1	101631_b4_1_IAC(UniMod:4)VLPVLMDGIQSHPQKPFYTVGEK_4	-1	3774	10444_IAC(UniMod:4)VLPVLMDGIQSHPQKPFYTVGEK_4	0	IACVLPVLMDGIQSHPQKPFYTVGEK	b4/-0.001,m2:5/-0.001	IAC(UniMod:4)VLPVLMDGIQSHPQKPFYTVGEK	4	10444_IAC(UniMod:4)VLPVLMDGIQSHPQKPFYTVGEK_4	1/P10643	1	b	4	light
1/P10643	732.634	1293.68	96.1	101639_y11_1_IAC(UniMod:4)VLPVLMDGIQSHPQKPFYTVGEK_4	-1	1999.2	10444_IAC(UniMod:4)VLPVLMDGIQSHPQKPFYTVGEK_4	0	IACVLPVLMDGIQSHPQKPFYTVGEK	y11/-0.010	IAC(UniMod:4)VLPVLMDGIQSHPQKPFYTVGEK	4	10444_IAC(UniMod:4)VLPVLMDGIQSHPQKPFYTVGEK_4	1/P10643	1	y	11	light
1/P10643	732.634	940.477	96.1	101636_y8_1_IAC(UniMod:4)VLPVLMDGIQSHPQKPFYTVGEK_4	-1	2998.8	10444_IAC(UniMod:4)VLPVLMDGIQSHPQKPFYTVGEK_4	0	IACVLPVLMDGIQSHPQKPFYTVGEK	y8/-0.009	IAC(UniMod:4)VLPVLMDGIQSHPQKPFYTVGEK	4	10444_IAC(UniMod:4)VLPVLMDGIQSHPQKPFYTVGEK_4	1/P10643	1	y	8	light
1/P36776	496.739	478.214	-5.3	150043_y4_1_ALC(UniMod:4)GLDESK_2	-1	1034.8	10446_ALC(UniMod:4)GLDESK_2	0	ALCGLDESK	y4/-0.000	ALC(UniMod:4)GLDESK	2	10446_ALC(UniMod:4)GLDESK_2	1/P36776	1	y	4	light
1/P36776	496.739	648.32	-5.3	150046_y6_1_ALC(UniMod:4)GLDESK_2	-1	2987.4	10446_ALC(UniMod:4)GLDESK_2	0	ALCGLDESK	y6/-0.003	ALC(UniMod:4)GLDESK	2	10446_ALC(UniMod:4)GLDESK_2	1/P36776	1	y	6	light
1/P36776	496.739	808.351	-5.3	150048_y7_1_ALC(UniMod:4)GLDESK_2	-1	5267.4	10446_ALC(UniMod:4)GLDESK_2	0	ALCGLDESK	y7/-0.002	ALC(UniMod:4)GLDESK	2	10446_ALC(UniMod:4)GLDESK_2	1/P36776	1	y	7	light
1/P36776	496.739	363.187	-5.3	150040_y3_1_ALC(UniMod:4)GLDESK_2	-1	552.6	10446_ALC(UniMod:4)GLDESK_2	0	ALCGLDESK	y3/0.000	ALC(UniMod:4)GLDESK	2	10446_ALC(UniMod:4)GLDESK_2	1/P36776	1	y	3	light
1/P36776	496.739	404.679	-5.3	150041_y7_2_ALC(UniMod:4)GLDESK_2	-1	2029.8	10446_ALC(UniMod:4)GLDESK_2	0	ALCGLDESK	y7^2/0.000	ALC(UniMod:4)GLDESK	2	10446_ALC(UniMod:4)GLDESK_2	1/P36776	2	y	7	light
1/P36776	496.739	591.298	-5.3	150044_y5_1_ALC(UniMod:4)GLDESK_2	-1	512	10446_ALC(UniMod:4)GLDESK_2	0	ALCGLDESK	y5/-0.001	ALC(UniMod:4)GLDESK	2	10446_ALC(UniMod:4)GLDESK_2	1/P36776	1	y	5	light
1/Q8IV08	887.156	617.337	82.2	100871_y6_1_IAVSKPSGPQPQADLQALLQSGAQVR_3	-1	8512.8	10446_IAVSKPSGPQPQADLQALLQSGAQVR_3	0	IAVSKPSGPQPQADLQALLQSGAQVR	y6/0.002,a13^2/-0.012	IAVSKPSGPQPQADLQALLQSGAQVR	3	10446_IAVSKPSGPQPQADLQALLQSGAQVR_3	1/Q8IV08	1	y	6	light
1/Q8IV08	887.156	971.563	82.2	100875_y9_1_IAVSKPSGPQPQADLQALLQSGAQVR_3	-1	6059.1	10446_IAVSKPSGPQPQADLQALLQSGAQVR_3	0	IAVSKPSGPQPQADLQALLQSGAQVR	y9/-0.007	IAVSKPSGPQPQADLQALLQSGAQVR	3	10446_IAVSKPSGPQPQADLQALLQSGAQVR_3	1/Q8IV08	1	y	9	light
1/Q8IV08	887.156	745.395	82.2	100872_y7_1_IAVSKPSGPQPQADLQALLQSGAQVR_3	-1	10000	10446_IAVSKPSGPQPQADLQALLQSGAQVR_3	0	IAVSKPSGPQPQADLQALLQSGAQVR	y7/0.001,b15^2/-0.008	IAVSKPSGPQPQADLQALLQSGAQVR	3	10446_IAVSKPSGPQPQADLQALLQSGAQVR_3	1/Q8IV08	1	y	7	light
1/Q8IV08	887.156	858.479	82.2	100873_y8_1_IAVSKPSGPQPQADLQALLQSGAQVR_3	-1	9938.8	10446_IAVSKPSGPQPQADLQALLQSGAQVR_3	0	IAVSKPSGPQPQADLQALLQSGAQVR	y8/-0.002	IAVSKPSGPQPQADLQALLQSGAQVR	3	10446_IAVSKPSGPQPQADLQALLQSGAQVR_3	1/Q8IV08	1	y	8	light
1/Q8IV08	887.156	1042.6	82.2	100876_y10_1_IAVSKPSGPQPQADLQALLQSGAQVR_3	-1	7895.8	10446_IAVSKPSGPQPQADLQALLQSGAQVR_3	0	IAVSKPSGPQPQADLQALLQSGAQVR	y10/0.002	IAVSKPSGPQPQADLQALLQSGAQVR	3	10446_IAVSKPSGPQPQADLQALLQSGAQVR_3	1/Q8IV08	1	y	10	light
1/Q8IV08	887.156	1170.66	82.2	100877_y11_1_IAVSKPSGPQPQADLQALLQSGAQVR_3	-1	4827.6	10446_IAVSKPSGPQPQADLQALLQSGAQVR_3	0	IAVSKPSGPQPQADLQALLQSGAQVR	y11/0.002	IAVSKPSGPQPQADLQALLQSGAQVR	3	10446_IAVSKPSGPQPQADLQALLQSGAQVR_3	1/Q8IV08	1	y	11	light
1/P36776	596.306	759.334	-12.2	150055_b7_1_ALC(UniMod:4)GLDESKAK_2	-1	206.8	10447_ALC(UniMod:4)GLDESKAK_2	0	ALCGLDESKAK	b7/0.013	ALC(UniMod:4)GLDESKAK	2	10447_ALC(UniMod:4)GLDESKAK_2	1/P36776	1	b	7	light
1/P36776	596.306	562.32	-12.2	150052_y5_1_ALC(UniMod:4)GLDESKAK_2	-1	243.9	10447_ALC(UniMod:4)GLDESKAK_2	0	ALCGLDESKAK	y5/0.016	ALC(UniMod:4)GLDESKAK	2	10447_ALC(UniMod:4)GLDESKAK_2	1/P36776	1	y	5	light
1/P36776	596.306	677.346	-12.2	150054_y6_1_ALC(UniMod:4)GLDESKAK_2	-1	223.3	10447_ALC(UniMod:4)GLDESKAK_2	0	ALCGLDESKAK	y6/0.011	ALC(UniMod:4)GLDESKAK	2	10447_ALC(UniMod:4)GLDESKAK_2	1/P36776	1	y	6	light
1/P36776	596.306	504.245	-12.2	150050_y9_2_ALC(UniMod:4)GLDESKAK_2	-1	537.8	10447_ALC(UniMod:4)GLDESKAK_2	0	ALCGLDESKAK	y9^2/0.008	ALC(UniMod:4)GLDESKAK	2	10447_ALC(UniMod:4)GLDESKAK_2	1/P36776	2	y	9	light
1/P36776	596.306	1007.48	-12.2	150057_y9_1_ALC(UniMod:4)GLDESKAK_2	-1	614.2	10447_ALC(UniMod:4)GLDESKAK_2	0	ALCGLDESKAK	y9/-0.007	ALC(UniMod:4)GLDESKAK	2	10447_ALC(UniMod:4)GLDESKAK_2	1/P36776	1	y	9	light
1/P36776	596.306	515.265	-12.2	150051_b5_1_ALC(UniMod:4)GLDESKAK_2	-1	185.1	10447_ALC(UniMod:4)GLDESKAK_2	0	ALCGLDESKAK	b5/0.009,y10-91^2/-0.009	ALC(UniMod:4)GLDESKAK	2	10447_ALC(UniMod:4)GLDESKAK_2	1/P36776	1	b	5	light
1/Q8IV08	665.619	965.541	82.5	100887_b10_1_IAVSKPSGPQPQADLQALLQSGAQVR_4	-1	3083.2	10447_IAVSKPSGPQPQADLQALLQSGAQVR_4	0	IAVSKPSGPQPQADLQALLQSGAQVR	b10/0.013	IAVSKPSGPQPQADLQALLQSGAQVR	4	10447_IAVSKPSGPQPQADLQALLQSGAQVR_4	1/Q8IV08	1	b	10	light
1/Q8IV08	665.619	617.337	82.5	100884_y6_1_IAVSKPSGPQPQADLQALLQSGAQVR_4	-1	8616.9	10447_IAVSKPSGPQPQADLQALLQSGAQVR_4	0	IAVSKPSGPQPQADLQALLQSGAQVR	y6/0.003,a13^2/-0.012	IAVSKPSGPQPQADLQALLQSGAQVR	4	10447_IAVSKPSGPQPQADLQALLQSGAQVR_4	1/Q8IV08	1	y	6	light
1/Q8IV08	665.619	745.404	82.5	100885_b15_2_IAVSKPSGPQPQADLQALLQSGAQVR_4	-1	10000	10447_IAVSKPSGPQPQADLQALLQSGAQVR_4	0	IAVSKPSGPQPQADLQALLQSGAQVR	b15^2/-0.004,y7/0.005	IAVSKPSGPQPQADLQALLQSGAQVR	4	10447_IAVSKPSGPQPQADLQALLQSGAQVR_4	1/Q8IV08	2	b	15	light
1/Q8IV08	665.619	1042.6	82.5	100889_y10_1_IAVSKPSGPQPQADLQALLQSGAQVR_4	-1	1870.9	10447_IAVSKPSGPQPQADLQALLQSGAQVR_4	0	IAVSKPSGPQPQADLQALLQSGAQVR	y10/-0.007,b21-46^2/0.015	IAVSKPSGPQPQADLQALLQSGAQVR	4	10447_IAVSKPSGPQPQADLQALLQSGAQVR_4	1/Q8IV08	1	y	10	light
1/Q8IV08	665.619	530.305	82.5	100883_y5_1_IAVSKPSGPQPQADLQALLQSGAQVR_4	-1	5961.5	10447_IAVSKPSGPQPQADLQALLQSGAQVR_4	0	IAVSKPSGPQPQADLQALLQSGAQVR	y5/0.010	IAVSKPSGPQPQADLQALLQSGAQVR	4	10447_IAVSKPSGPQPQADLQALLQSGAQVR_4	1/Q8IV08	1	y	5	light
1/Q8IV08	665.619	858.479	82.5	100886_y8_1_IAVSKPSGPQPQADLQALLQSGAQVR_4	-1	4049.3	10447_IAVSKPSGPQPQADLQALLQSGAQVR_4	0	IAVSKPSGPQPQADLQALLQSGAQVR	y8/-0.001	IAVSKPSGPQPQADLQALLQSGAQVR	4	10447_IAVSKPSGPQPQADLQALLQSGAQVR_4	1/Q8IV08	1	y	8	light
1/P02787	853.887	472.251	42.7	1602061_LC(UniMod:4)MGSGLNLC(UniMod:4)EPNNK_2	-1	10000	104559_LC(UniMod:4)MGSGLNLC(UniMod:4)EPNNK_2	0	LCMGSGLNLCEPNNK	y4/-0.001	LC(UniMod:4)MGSGLNLC(UniMod:4)EPNNK	2	104559_LC(UniMod:4)MGSGLNLC(UniMod:4)EPNNK_2	1/P02787	1	y	-1	light
1/P02787	853.887	1302.61	42.7	1602080_LC(UniMod:4)MGSGLNLC(UniMod:4)EPNNK_2	-1	2423.5	104559_LC(UniMod:4)MGSGLNLC(UniMod:4)EPNNK_2	0	LCMGSGLNLCEPNNK	y12/0.001	LC(UniMod:4)MGSGLNLC(UniMod:4)EPNNK	2	104559_LC(UniMod:4)MGSGLNLC(UniMod:4)EPNNK_2	1/P02787	1	y	-1	light
1/P02787	853.887	1433.65	42.7	1602083_LC(UniMod:4)MGSGLNLC(UniMod:4)EPNNK_2	-1	2684.8	104559_LC(UniMod:4)MGSGLNLC(UniMod:4)EPNNK_2	0	LCMGSGLNLCEPNNK	y13/-0.001	LC(UniMod:4)MGSGLNLC(UniMod:4)EPNNK	2	104559_LC(UniMod:4)MGSGLNLC(UniMod:4)EPNNK_2	1/P02787	1	y	-1	light
1/P02787	853.887	1158.56	42.7	1602077_LC(UniMod:4)MGSGLNLC(UniMod:4)EPNNK_2	-1	1760.2	104559_LC(UniMod:4)MGSGLNLC(UniMod:4)EPNNK_2	0	LCMGSGLNLCEPNNK	y10/0.002	LC(UniMod:4)MGSGLNLC(UniMod:4)EPNNK	2	104559_LC(UniMod:4)MGSGLNLC(UniMod:4)EPNNK_2	1/P02787	1	y	-1	light
1/P02787	853.887	988.452	42.7	1602075_LC(UniMod:4)MGSGLNLC(UniMod:4)EPNNK_2	-1	2200	104559_LC(UniMod:4)MGSGLNLC(UniMod:4)EPNNK_2	0	LCMGSGLNLCEPNNK	y8/-0.001	LC(UniMod:4)MGSGLNLC(UniMod:4)EPNNK	2	104559_LC(UniMod:4)MGSGLNLC(UniMod:4)EPNNK_2	1/P02787	1	y	-1	light
1/P02787	853.887	761.325	42.7	1602069_LC(UniMod:4)MGSGLNLC(UniMod:4)EPNNK_2	-1	2273.8	104559_LC(UniMod:4)MGSGLNLC(UniMod:4)EPNNK_2	0	LCMGSGLNLCEPNNK	y6/-0.000	LC(UniMod:4)MGSGLNLC(UniMod:4)EPNNK	2	104559_LC(UniMod:4)MGSGLNLC(UniMod:4)EPNNK_2	1/P02787	1	y	-1	light
1/Q99487	564.764	739.319	-41.7	100949_b6_1_IC(UniMod:4)AQHEQSR_2	-1	2631.6	10456_IC(UniMod:4)AQHEQSR_2	0	ICAQHEQSR	b6/0.003	IC(UniMod:4)AQHEQSR	2	10456_IC(UniMod:4)AQHEQSR_2	1/Q99487	1	b	6	light
1/Q99487	564.764	390.21	-41.7	100946_y3_1_IC(UniMod:4)AQHEQSR_2	-1	2105.3	10456_IC(UniMod:4)AQHEQSR_2	0	ICAQHEQSR	y3/-0.010	IC(UniMod:4)AQHEQSR	2	10456_IC(UniMod:4)AQHEQSR_2	1/Q99487	1	y	3	light
1/Q99487	564.764	519.252	-41.7	100947_y4_1_IC(UniMod:4)AQHEQSR_2	-1	3684.2	10456_IC(UniMod:4)AQHEQSR_2	0	ICAQHEQSR	y4/-0.011,p-91^2/-0.018	IC(UniMod:4)AQHEQSR	2	10456_IC(UniMod:4)AQHEQSR_2	1/Q99487	1	y	4	light
1/Q99487	564.764	784.37	-41.7	100950_y6_1_IC(UniMod:4)AQHEQSR_2	-1	2631.6	10456_IC(UniMod:4)AQHEQSR_2	0	ICAQHEQSR	y6/0.004	IC(UniMod:4)AQHEQSR	2	10456_IC(UniMod:4)AQHEQSR_2	1/Q99487	1	y	6	light
1/Q99487	564.764	855.407	-41.7	100951_y7_1_IC(UniMod:4)AQHEQSR_2	-1	7368.4	10456_IC(UniMod:4)AQHEQSR_2	0	ICAQHEQSR	y7/0.009	IC(UniMod:4)AQHEQSR	2	10456_IC(UniMod:4)AQHEQSR_2	1/Q99487	1	y	7	light
1/Q99487	564.764	656.311	-41.7	100948_y5_1_IC(UniMod:4)AQHEQSR_2	-1	8947.4	10456_IC(UniMod:4)AQHEQSR_2	0	ICAQHEQSR	y5/0.016	IC(UniMod:4)AQHEQSR	2	10456_IC(UniMod:4)AQHEQSR_2	1/Q99487	1	y	5	light
1/P02787	861.884	472.251	19.6	1602084_LC(UniMod:4)M(UniMod:35)GSGLNLC(UniMod:4)EPNNK_2	-1	10000	104560_LC(UniMod:4)M(UniMod:35)GSGLNLC(UniMod:4)EPNNK_2	0	LCMGSGLNLCEPNNK	y4/-0.002	LC(UniMod:4)M(UniMod:35)GSGLNLC(UniMod:4)EPNNK	2	104560_LC(UniMod:4)M(UniMod:35)GSGLNLC(UniMod:4)EPNNK_2	1/P02787	1	y	-1	light
1/P02787	861.884	601.294	19.6	1602086_LC(UniMod:4)M(UniMod:35)GSGLNLC(UniMod:4)EPNNK_2	-1	1927.9	104560_LC(UniMod:4)M(UniMod:35)GSGLNLC(UniMod:4)EPNNK_2	0	LCMGSGLNLCEPNNK	y5/0.011,y11-44^2/0.002	LC(UniMod:4)M(UniMod:35)GSGLNLC(UniMod:4)EPNNK	2	104560_LC(UniMod:4)M(UniMod:35)GSGLNLC(UniMod:4)EPNNK_2	1/P02787	1	y	-1	light
1/P02787	861.884	761.325	19.6	1602088_LC(UniMod:4)M(UniMod:35)GSGLNLC(UniMod:4)EPNNK_2	-1	2617.1	104560_LC(UniMod:4)M(UniMod:35)GSGLNLC(UniMod:4)EPNNK_2	0	LCMGSGLNLCEPNNK	y6/0.019	LC(UniMod:4)M(UniMod:35)GSGLNLC(UniMod:4)EPNNK	2	104560_LC(UniMod:4)M(UniMod:35)GSGLNLC(UniMod:4)EPNNK_2	1/P02787	1	y	-1	light
1/P02787	861.884	988.452	19.6	1602092_LC(UniMod:4)M(UniMod:35)GSGLNLC(UniMod:4)EPNNK_2	-1	2711	104560_LC(UniMod:4)M(UniMod:35)GSGLNLC(UniMod:4)EPNNK_2	0	LCMGSGLNLCEPNNK	y8/0.018	LC(UniMod:4)M(UniMod:35)GSGLNLC(UniMod:4)EPNNK	2	104560_LC(UniMod:4)M(UniMod:35)GSGLNLC(UniMod:4)EPNNK_2	1/P02787	1	y	-1	light
1/P02787	861.884	874.409	19.6	1602090_LC(UniMod:4)M(UniMod:35)GSGLNLC(UniMod:4)EPNNK_2	-1	2044.1	104560_LC(UniMod:4)M(UniMod:35)GSGLNLC(UniMod:4)EPNNK_2	0	LCMGSGLNLCEPNNK	y7/0.020	LC(UniMod:4)M(UniMod:35)GSGLNLC(UniMod:4)EPNNK	2	104560_LC(UniMod:4)M(UniMod:35)GSGLNLC(UniMod:4)EPNNK_2	1/P02787	1	y	-1	light
1/P02787	861.884	1302.61	19.6	1602096_LC(UniMod:4)M(UniMod:35)GSGLNLC(UniMod:4)EPNNK_2	-1	2047	104560_LC(UniMod:4)M(UniMod:35)GSGLNLC(UniMod:4)EPNNK_2	0	LCMGSGLNLCEPNNK	y12/-0.008	LC(UniMod:4)M(UniMod:35)GSGLNLC(UniMod:4)EPNNK	2	104560_LC(UniMod:4)M(UniMod:35)GSGLNLC(UniMod:4)EPNNK_2	1/P02787	1	y	-1	light
1/P02787	569.593	833.364	42.4	1602111_LC(UniMod:4)MGSGLNLC(UniMod:4)EPNNK_3	-1	2730.8	104561_LC(UniMod:4)MGSGLNLC(UniMod:4)EPNNK_3	0	LCMGSGLNLCEPNNK	b8/-0.007	LC(UniMod:4)MGSGLNLC(UniMod:4)EPNNK	3	104561_LC(UniMod:4)MGSGLNLC(UniMod:4)EPNNK_3	1/P02787	1	b	-1	light
1/P02787	569.593	719.321	42.4	1602109_LC(UniMod:4)MGSGLNLC(UniMod:4)EPNNK_3	-1	1617	104561_LC(UniMod:4)MGSGLNLC(UniMod:4)EPNNK_3	0	LCMGSGLNLCEPNNK	b7/0.002	LC(UniMod:4)MGSGLNLC(UniMod:4)EPNNK	3	104561_LC(UniMod:4)MGSGLNLC(UniMod:4)EPNNK_3	1/P02787	1	b	-1	light
1/P02787	569.593	606.237	42.4	1602107_LC(UniMod:4)MGSGLNLC(UniMod:4)EPNNK_3	-1	1789.5	104561_LC(UniMod:4)MGSGLNLC(UniMod:4)EPNNK_3	0	LCMGSGLNLCEPNNK	b6/0.008,m2:7/0.008	LC(UniMod:4)MGSGLNLC(UniMod:4)EPNNK	3	104561_LC(UniMod:4)MGSGLNLC(UniMod:4)EPNNK_3	1/P02787	1	b	-1	light
1/P02787	569.593	761.325	42.4	1602110_LC(UniMod:4)MGSGLNLC(UniMod:4)EPNNK_3	-1	6548.8	104561_LC(UniMod:4)MGSGLNLC(UniMod:4)EPNNK_3	0	LCMGSGLNLCEPNNK	y6/-0.006	LC(UniMod:4)MGSGLNLC(UniMod:4)EPNNK	3	104561_LC(UniMod:4)MGSGLNLC(UniMod:4)EPNNK_3	1/P02787	1	y	-1	light
1/P02787	569.593	601.294	42.4	1602104_LC(UniMod:4)MGSGLNLC(UniMod:4)EPNNK_3	-1	2287.7	104561_LC(UniMod:4)MGSGLNLC(UniMod:4)EPNNK_3	0	LCMGSGLNLCEPNNK	y5/0.006,y11-44^2/-0.003	LC(UniMod:4)MGSGLNLC(UniMod:4)EPNNK	3	104561_LC(UniMod:4)MGSGLNLC(UniMod:4)EPNNK_3	1/P02787	1	y	-1	light
1/P02787	569.593	472.251	42.4	1602101_LC(UniMod:4)MGSGLNLC(UniMod:4)EPNNK_3	-1	10000	104561_LC(UniMod:4)MGSGLNLC(UniMod:4)EPNNK_3	0	LCMGSGLNLCEPNNK	y4/-0.003	LC(UniMod:4)MGSGLNLC(UniMod:4)EPNNK	3	104561_LC(UniMod:4)MGSGLNLC(UniMod:4)EPNNK_3	1/P02787	1	y	-1	light
1/P02787	574.925	761.325	18.8	1602130_LC(UniMod:4)M(UniMod:35)GSGLNLC(UniMod:4)EPNNK_3	-1	10000	104562_LC(UniMod:4)M(UniMod:35)GSGLNLC(UniMod:4)EPNNK_3	0	LCMGSGLNLCEPNNK	y6/-0.002	LC(UniMod:4)M(UniMod:35)GSGLNLC(UniMod:4)EPNNK	3	104562_LC(UniMod:4)M(UniMod:35)GSGLNLC(UniMod:4)EPNNK_3	1/P02787	1	y	-1	light
1/P02787	574.925	849.359	18.8	1602131_LC(UniMod:4)M(UniMod:35)GSGLNLC(UniMod:4)EPNNK_3	-1	4425.7	104562_LC(UniMod:4)M(UniMod:35)GSGLNLC(UniMod:4)EPNNK_3	0	LCMGSGLNLCEPNNK	b8/0.011,m3:10/0.011	LC(UniMod:4)M(UniMod:35)GSGLNLC(UniMod:4)EPNNK	3	104562_LC(UniMod:4)M(UniMod:35)GSGLNLC(UniMod:4)EPNNK_3	1/P02787	1	b	-1	light
1/P02787	574.925	472.251	18.8	1602120_LC(UniMod:4)M(UniMod:35)GSGLNLC(UniMod:4)EPNNK_3	-1	8864.9	104562_LC(UniMod:4)M(UniMod:35)GSGLNLC(UniMod:4)EPNNK_3	0	LCMGSGLNLCEPNNK	y4/-0.001	LC(UniMod:4)M(UniMod:35)GSGLNLC(UniMod:4)EPNNK	3	104562_LC(UniMod:4)M(UniMod:35)GSGLNLC(UniMod:4)EPNNK_3	1/P02787	1	y	-1	light
1/P02787	574.925	874.409	18.8	1602132_LC(UniMod:4)M(UniMod:35)GSGLNLC(UniMod:4)EPNNK_3	-1	2256.8	104562_LC(UniMod:4)M(UniMod:35)GSGLNLC(UniMod:4)EPNNK_3	0	LCMGSGLNLCEPNNK	y7/0.016	LC(UniMod:4)M(UniMod:35)GSGLNLC(UniMod:4)EPNNK	3	104562_LC(UniMod:4)M(UniMod:35)GSGLNLC(UniMod:4)EPNNK_3	1/P02787	1	y	-1	light
1/P02787	574.925	735.316	18.8	1602129_LC(UniMod:4)M(UniMod:35)GSGLNLC(UniMod:4)EPNNK_3	-1	2203.6	104562_LC(UniMod:4)M(UniMod:35)GSGLNLC(UniMod:4)EPNNK_3	0	LCMGSGLNLCEPNNK	b7/-0.004	LC(UniMod:4)M(UniMod:35)GSGLNLC(UniMod:4)EPNNK	3	104562_LC(UniMod:4)M(UniMod:35)GSGLNLC(UniMod:4)EPNNK_3	1/P02787	1	b	-1	light
1/P02787	574.925	601.294	18.8	1602125_LC(UniMod:4)M(UniMod:35)GSGLNLC(UniMod:4)EPNNK_3	-1	2535.5	104562_LC(UniMod:4)M(UniMod:35)GSGLNLC(UniMod:4)EPNNK_3	0	LCMGSGLNLCEPNNK	y5/-0.010	LC(UniMod:4)M(UniMod:35)GSGLNLC(UniMod:4)EPNNK	3	104562_LC(UniMod:4)M(UniMod:35)GSGLNLC(UniMod:4)EPNNK_3	1/P02787	1	y	-1	light
1/P02787	991.111	1013.44	72.4	1602140_LC(UniMod:4)MGSGLNLC(UniMod:4)EPNNKEGYYGYTGAFR_3	-1	3048.4	104563_LC(UniMod:4)MGSGLNLC(UniMod:4)EPNNKEGYYGYTGAFR_3	0	LCMGSGLNLCEPNNKEGYYGYTGAFR	y17^2/-0.001	LC(UniMod:4)MGSGLNLC(UniMod:4)EPNNKEGYYGYTGAFR	3	104563_LC(UniMod:4)MGSGLNLC(UniMod:4)EPNNKEGYYGYTGAFR_3	1/P02787	2	y	-1	light
1/P02787	991.111	1349.6	72.4	1602146_LC(UniMod:4)MGSGLNLC(UniMod:4)EPNNKEGYYGYTGAFR_3	-1	4300.9	104563_LC(UniMod:4)MGSGLNLC(UniMod:4)EPNNKEGYYGYTGAFR_3	0	LCMGSGLNLCEPNNKEGYYGYTGAFR	y24^2/0.007	LC(UniMod:4)MGSGLNLC(UniMod:4)EPNNKEGYYGYTGAFR	3	104563_LC(UniMod:4)MGSGLNLC(UniMod:4)EPNNKEGYYGYTGAFR_3	1/P02787	2	y	-1	light
1/P02787	991.111	1212.06	72.4	1602143_LC(UniMod:4)MGSGLNLC(UniMod:4)EPNNKEGYYGYTGAFR_3	-1	3148.7	104563_LC(UniMod:4)MGSGLNLC(UniMod:4)EPNNKEGYYGYTGAFR_3	0	LCMGSGLNLCEPNNKEGYYGYTGAFR	y21^2/0.013	LC(UniMod:4)MGSGLNLC(UniMod:4)EPNNKEGYYGYTGAFR	3	104563_LC(UniMod:4)MGSGLNLC(UniMod:4)EPNNKEGYYGYTGAFR_3	1/P02787	2	y	-1	light
1/P02787	991.111	771.378	72.4	1602136_LC(UniMod:4)MGSGLNLC(UniMod:4)EPNNKEGYYGYTGAFR_3	-1	4660.3	104563_LC(UniMod:4)MGSGLNLC(UniMod:4)EPNNKEGYYGYTGAFR_3	0	LCMGSGLNLCEPNNKEGYYGYTGAFR	y7/0.008	LC(UniMod:4)MGSGLNLC(UniMod:4)EPNNKEGYYGYTGAFR	3	104563_LC(UniMod:4)MGSGLNLC(UniMod:4)EPNNKEGYYGYTGAFR_3	1/P02787	1	y	-1	light
1/P02787	991.111	1284.08	72.4	1602145_LC(UniMod:4)MGSGLNLC(UniMod:4)EPNNKEGYYGYTGAFR_3	-1	3297.3	104563_LC(UniMod:4)MGSGLNLC(UniMod:4)EPNNKEGYYGYTGAFR_3	0	LCMGSGLNLCEPNNKEGYYGYTGAFR	y23^2/0.014	LC(UniMod:4)MGSGLNLC(UniMod:4)EPNNKEGYYGYTGAFR	3	104563_LC(UniMod:4)MGSGLNLC(UniMod:4)EPNNKEGYYGYTGAFR_3	1/P02787	2	y	-1	light
1/P02787	991.111	1283.57	72.4	1602144_LC(UniMod:4)MGSGLNLC(UniMod:4)EPNNKEGYYGYTGAFR_3	-1	3365.1	104563_LC(UniMod:4)MGSGLNLC(UniMod:4)EPNNKEGYYGYTGAFR_3	0	LCMGSGLNLCEPNNKEGYYGYTGAFR	y11/0.010	LC(UniMod:4)MGSGLNLC(UniMod:4)EPNNKEGYYGYTGAFR	3	104563_LC(UniMod:4)MGSGLNLC(UniMod:4)EPNNKEGYYGYTGAFR_3	1/P02787	1	y	-1	light
1/P02787	996.442	771.378	58.9	1602151_LC(UniMod:4)M(UniMod:35)GSGLNLC(UniMod:4)EPNNKEGYYGYTGAFR_3	-1	6464.7	104564_LC(UniMod:4)M(UniMod:35)GSGLNLC(UniMod:4)EPNNKEGYYGYTGAFR_3	0	LCMGSGLNLCEPNNKEGYYGYTGAFR	y7/0.003	LC(UniMod:4)M(UniMod:35)GSGLNLC(UniMod:4)EPNNKEGYYGYTGAFR	3	104564_LC(UniMod:4)M(UniMod:35)GSGLNLC(UniMod:4)EPNNKEGYYGYTGAFR_3	1/P02787	1	y	-1	light
1/P02787	996.442	1283.57	58.9	1602156_LC(UniMod:4)M(UniMod:35)GSGLNLC(UniMod:4)EPNNKEGYYGYTGAFR_3	-1	7481.4	104564_LC(UniMod:4)M(UniMod:35)GSGLNLC(UniMod:4)EPNNKEGYYGYTGAFR_3	0	LCMGSGLNLCEPNNKEGYYGYTGAFR	y11/-0.003	LC(UniMod:4)M(UniMod:35)GSGLNLC(UniMod:4)EPNNKEGYYGYTGAFR	3	104564_LC(UniMod:4)M(UniMod:35)GSGLNLC(UniMod:4)EPNNKEGYYGYTGAFR_3	1/P02787	1	y	-1	light
1/P02787	996.442	934.442	58.9	1602153_LC(UniMod:4)M(UniMod:35)GSGLNLC(UniMod:4)EPNNKEGYYGYTGAFR_3	-1	6533.4	104564_LC(UniMod:4)M(UniMod:35)GSGLNLC(UniMod:4)EPNNKEGYYGYTGAFR_3	0	LCMGSGLNLCEPNNKEGYYGYTGAFR	y8/-0.008,a9/-0.014	LC(UniMod:4)M(UniMod:35)GSGLNLC(UniMod:4)EPNNKEGYYGYTGAFR	3	104564_LC(UniMod:4)M(UniMod:35)GSGLNLC(UniMod:4)EPNNKEGYYGYTGAFR_3	1/P02787	1	y	-1	light
1/P02787	996.442	868.905	58.9	1602152_LC(UniMod:4)M(UniMod:35)GSGLNLC(UniMod:4)EPNNKEGYYGYTGAFR_3	-1	5774.9	104564_LC(UniMod:4)M(UniMod:35)GSGLNLC(UniMod:4)EPNNKEGYYGYTGAFR_3	0	LCMGSGLNLCEPNNKEGYYGYTGAFR	y15^2/0.011	LC(UniMod:4)M(UniMod:35)GSGLNLC(UniMod:4)EPNNKEGYYGYTGAFR	3	104564_LC(UniMod:4)M(UniMod:35)GSGLNLC(UniMod:4)EPNNKEGYYGYTGAFR_3	1/P02787	2	y	-1	light
1/P02787	996.442	1154.53	58.9	1602155_LC(UniMod:4)M(UniMod:35)GSGLNLC(UniMod:4)EPNNKEGYYGYTGAFR_3	-1	9053.7	104564_LC(UniMod:4)M(UniMod:35)GSGLNLC(UniMod:4)EPNNKEGYYGYTGAFR_3	0	LCMGSGLNLCEPNNKEGYYGYTGAFR	y10/-0.009	LC(UniMod:4)M(UniMod:35)GSGLNLC(UniMod:4)EPNNKEGYYGYTGAFR	3	104564_LC(UniMod:4)M(UniMod:35)GSGLNLC(UniMod:4)EPNNKEGYYGYTGAFR_3	1/P02787	1	y	-1	light
1/P02787	996.442	1736.8	58.9	1602157_LC(UniMod:4)M(UniMod:35)GSGLNLC(UniMod:4)EPNNKEGYYGYTGAFR_3	-1	5486.6	104564_LC(UniMod:4)M(UniMod:35)GSGLNLC(UniMod:4)EPNNKEGYYGYTGAFR_3	0	LCMGSGLNLCEPNNKEGYYGYTGAFR	y15/-0.014	LC(UniMod:4)M(UniMod:35)GSGLNLC(UniMod:4)EPNNKEGYYGYTGAFR	3	104564_LC(UniMod:4)M(UniMod:35)GSGLNLC(UniMod:4)EPNNKEGYYGYTGAFR_3	1/P02787	1	y	-1	light
1/P02787	747.583	771.378	58.9	1602170_LC(UniMod:4)M(UniMod:35)GSGLNLC(UniMod:4)EPNNKEGYYGYTGAFR_4	-1	8677.4	104565_LC(UniMod:4)M(UniMod:35)GSGLNLC(UniMod:4)EPNNKEGYYGYTGAFR_4	0	LCMGSGLNLCEPNNKEGYYGYTGAFR	y7/-0.006	LC(UniMod:4)M(UniMod:35)GSGLNLC(UniMod:4)EPNNKEGYYGYTGAFR	4	104565_LC(UniMod:4)M(UniMod:35)GSGLNLC(UniMod:4)EPNNKEGYYGYTGAFR_4	1/P02787	1	y	-1	light
1/P02787	747.583	450.246	58.9	1602160_LC(UniMod:4)M(UniMod:35)GSGLNLC(UniMod:4)EPNNKEGYYGYTGAFR_4	-1	5161.3	104565_LC(UniMod:4)M(UniMod:35)GSGLNLC(UniMod:4)EPNNKEGYYGYTGAFR_4	0	LCMGSGLNLCEPNNKEGYYGYTGAFR	y4/0.005	LC(UniMod:4)M(UniMod:35)GSGLNLC(UniMod:4)EPNNKEGYYGYTGAFR	4	104565_LC(UniMod:4)M(UniMod:35)GSGLNLC(UniMod:4)EPNNKEGYYGYTGAFR_4	1/P02787	1	y	-1	light
1/P02787	747.583	714.357	58.9	1602166_LC(UniMod:4)M(UniMod:35)GSGLNLC(UniMod:4)EPNNKEGYYGYTGAFR_4	-1	2103.2	104565_LC(UniMod:4)M(UniMod:35)GSGLNLC(UniMod:4)EPNNKEGYYGYTGAFR_4	0	LCMGSGLNLCEPNNKEGYYGYTGAFR	[y6/-0.015]	LC(UniMod:4)M(UniMod:35)GSGLNLC(UniMod:4)EPNNKEGYYGYTGAFR	4	104565_LC(UniMod:4)M(UniMod:35)GSGLNLC(UniMod:4)EPNNKEGYYGYTGAFR_4	1/P02787	1	y	-1	light
1/P02787	747.583	849.359	58.9	1602172_LC(UniMod:4)M(UniMod:35)GSGLNLC(UniMod:4)EPNNKEGYYGYTGAFR_4	-1	2303.3	104565_LC(UniMod:4)M(UniMod:35)GSGLNLC(UniMod:4)EPNNKEGYYGYTGAFR_4	0	LCMGSGLNLCEPNNKEGYYGYTGAFR	[b8/0.016]	LC(UniMod:4)M(UniMod:35)GSGLNLC(UniMod:4)EPNNKEGYYGYTGAFR	4	104565_LC(UniMod:4)M(UniMod:35)GSGLNLC(UniMod:4)EPNNKEGYYGYTGAFR_4	1/P02787	1	b	-1	light
1/P02787	747.583	551.294	58.9	1602163_LC(UniMod:4)M(UniMod:35)GSGLNLC(UniMod:4)EPNNKEGYYGYTGAFR_4	-1	3980.6	104565_LC(UniMod:4)M(UniMod:35)GSGLNLC(UniMod:4)EPNNKEGYYGYTGAFR_4	0	LCMGSGLNLCEPNNKEGYYGYTGAFR	[y5/-0.017]	LC(UniMod:4)M(UniMod:35)GSGLNLC(UniMod:4)EPNNKEGYYGYTGAFR	4	104565_LC(UniMod:4)M(UniMod:35)GSGLNLC(UniMod:4)EPNNKEGYYGYTGAFR_4	1/P02787	1	y	-1	light
1/P02787	747.583	934.442	58.9	1602175_LC(UniMod:4)M(UniMod:35)GSGLNLC(UniMod:4)EPNNKEGYYGYTGAFR_4	-1	2322.6	104565_LC(UniMod:4)M(UniMod:35)GSGLNLC(UniMod:4)EPNNKEGYYGYTGAFR_4	0	LCMGSGLNLCEPNNKEGYYGYTGAFR	y8/0.017,a9/0.011	LC(UniMod:4)M(UniMod:35)GSGLNLC(UniMod:4)EPNNKEGYYGYTGAFR	4	104565_LC(UniMod:4)M(UniMod:35)GSGLNLC(UniMod:4)EPNNKEGYYGYTGAFR_4	1/P02787	1	y	-1	light
1/Q04756	573.266	388.165	-3.5	1602342_LC(UniMod:4)NIEPDER_2	-1	2245.6	104577_LC(UniMod:4)NIEPDER_2	0	LCNIEPDER	b3/-0.001,m2:4/-0.001	LC(UniMod:4)NIEPDER	2	104577_LC(UniMod:4)NIEPDER_2	1/Q04756	1	b	-1	light
1/Q04756	573.266	645.284	-3.5	1602349_LC(UniMod:4)NIEPDER_2	-1	3679.6	104577_LC(UniMod:4)NIEPDER_2	0	LCNIEPDER	y5/0.001	LC(UniMod:4)NIEPDER	2	104577_LC(UniMod:4)NIEPDER_2	1/Q04756	1	y	-1	light
1/Q04756	573.266	516.241	-3.5	1602345_LC(UniMod:4)NIEPDER_2	-1	6395.3	104577_LC(UniMod:4)NIEPDER_2	0	LCNIEPDER	y4/-0.001	LC(UniMod:4)NIEPDER	2	104577_LC(UniMod:4)NIEPDER_2	1/Q04756	1	y	-1	light
1/Q04756	573.266	501.249	-3.5	1602344_LC(UniMod:4)NIEPDER_2	-1	1105.7	104577_LC(UniMod:4)NIEPDER_2	0	LCNIEPDER	b4/-0.010	LC(UniMod:4)NIEPDER	2	104577_LC(UniMod:4)NIEPDER_2	1/Q04756	1	b	-1	light
1/Q04756	573.266	872.411	-3.5	1602352_LC(UniMod:4)NIEPDER_2	-1	6465.8	104577_LC(UniMod:4)NIEPDER_2	0	LCNIEPDER	y7/-0.006	LC(UniMod:4)NIEPDER	2	104577_LC(UniMod:4)NIEPDER_2	1/Q04756	1	y	-1	light
1/Q04756	573.266	758.368	-3.5	1602350_LC(UniMod:4)NIEPDER_2	-1	2252.3	104577_LC(UniMod:4)NIEPDER_2	0	LCNIEPDER	y6/-0.001	LC(UniMod:4)NIEPDER	2	104577_LC(UniMod:4)NIEPDER_2	1/Q04756	1	y	-1	light
1/P03952	735.322	1082.48	-19.7	1602514_LC(UniMod:4)NTGDNSVC(UniMod:4)TTK_2	-1	2111.9	104588_LC(UniMod:4)NTGDNSVC(UniMod:4)TTK_2	0	LCNTGDNSVCTTK	y10/-0.009	LC(UniMod:4)NTGDNSVC(UniMod:4)TTK	2	104588_LC(UniMod:4)NTGDNSVC(UniMod:4)TTK_2	1/P03952	1	y	-1	light
1/P03952	735.322	608.307	-19.7	1602504_LC(UniMod:4)NTGDNSVC(UniMod:4)TTK_2	-1	1181.8	104588_LC(UniMod:4)NTGDNSVC(UniMod:4)TTK_2	0	LCNTGDNSVCTTK	y5/-0.002	LC(UniMod:4)NTGDNSVC(UniMod:4)TTK	2	104588_LC(UniMod:4)NTGDNSVC(UniMod:4)TTK_2	1/P03952	1	y	-1	light
1/P03952	735.322	509.239	-19.7	1602501_LC(UniMod:4)NTGDNSVC(UniMod:4)TTK_2	-1	3948.3	104588_LC(UniMod:4)NTGDNSVC(UniMod:4)TTK_2	0	LCNTGDNSVCTTK	y4/0.003	LC(UniMod:4)NTGDNSVC(UniMod:4)TTK	2	104588_LC(UniMod:4)NTGDNSVC(UniMod:4)TTK_2	1/P03952	1	y	-1	light
1/P03952	735.322	1196.52	-19.7	1602515_LC(UniMod:4)NTGDNSVC(UniMod:4)TTK_2	-1	5473.6	104588_LC(UniMod:4)NTGDNSVC(UniMod:4)TTK_2	0	LCNTGDNSVCTTK	y11/0.007	LC(UniMod:4)NTGDNSVC(UniMod:4)TTK	2	104588_LC(UniMod:4)NTGDNSVC(UniMod:4)TTK_2	1/P03952	1	y	-1	light
1/P03952	735.322	981.431	-19.7	1602512_LC(UniMod:4)NTGDNSVC(UniMod:4)TTK_2	-1	2923	104588_LC(UniMod:4)NTGDNSVC(UniMod:4)TTK_2	0	LCNTGDNSVCTTK	y9/-0.000	LC(UniMod:4)NTGDNSVC(UniMod:4)TTK	2	104588_LC(UniMod:4)NTGDNSVC(UniMod:4)TTK_2	1/P03952	1	y	-1	light
1/P03952	735.322	695.339	-19.7	1602507_LC(UniMod:4)NTGDNSVC(UniMod:4)TTK_2	-1	1361.3	104588_LC(UniMod:4)NTGDNSVC(UniMod:4)TTK_2	0	LCNTGDNSVCTTK	y6/-0.003	LC(UniMod:4)NTGDNSVC(UniMod:4)TTK	2	104588_LC(UniMod:4)NTGDNSVC(UniMod:4)TTK_2	1/P03952	1	y	-1	light
1/P48147	1033.95	804.373	74.7	100993_y7_1_IC(UniMod:4)DPYAWLEDPDSEQTK_2	-1	10000	10462_IC(UniMod:4)DPYAWLEDPDSEQTK_2	0	ICDPYAWLEDPDSEQTK	y7/0.015	IC(UniMod:4)DPYAWLEDPDSEQTK	2	10462_IC(UniMod:4)DPYAWLEDPDSEQTK_2	1/P48147	1	y	7	light
1/P48147	1033.95	720.302	74.7	100992_b6_1_IC(UniMod:4)DPYAWLEDPDSEQTK_2	-1	2451.3	10462_IC(UniMod:4)DPYAWLEDPDSEQTK_2	0	ICDPYAWLEDPDSEQTK	b6/0.019	IC(UniMod:4)DPYAWLEDPDSEQTK	2	10462_IC(UniMod:4)DPYAWLEDPDSEQTK_2	1/P48147	1	b	6	light
1/P48147	1033.95	389.149	74.7	100987_b3_1_IC(UniMod:4)DPYAWLEDPDSEQTK_2	-1	2057.9	10462_IC(UniMod:4)DPYAWLEDPDSEQTK_2	0	ICDPYAWLEDPDSEQTK	b3/0.008	IC(UniMod:4)DPYAWLEDPDSEQTK	2	10462_IC(UniMod:4)DPYAWLEDPDSEQTK_2	1/P48147	1	b	3	light
1/P48147	1033.95	919.4	74.7	100994_y8_1_IC(UniMod:4)DPYAWLEDPDSEQTK_2	-1	2975.7	10462_IC(UniMod:4)DPYAWLEDPDSEQTK_2	0	ICDPYAWLEDPDSEQTK	y8/0.014	IC(UniMod:4)DPYAWLEDPDSEQTK	2	10462_IC(UniMod:4)DPYAWLEDPDSEQTK_2	1/P48147	1	y	8	light
1/P48147	1033.95	505.262	74.7	100988_y4_1_IC(UniMod:4)DPYAWLEDPDSEQTK_2	-1	810.1	10462_IC(UniMod:4)DPYAWLEDPDSEQTK_2	0	ICDPYAWLEDPDSEQTK	y4/0.006	IC(UniMod:4)DPYAWLEDPDSEQTK	2	10462_IC(UniMod:4)DPYAWLEDPDSEQTK_2	1/P48147	1	y	4	light
1/P48147	1033.95	592.294	74.7	100989_y5_1_IC(UniMod:4)DPYAWLEDPDSEQTK_2	-1	2718.1	10462_IC(UniMod:4)DPYAWLEDPDSEQTK_2	0	ICDPYAWLEDPDSEQTK	y5/0.006	IC(UniMod:4)DPYAWLEDPDSEQTK	2	10462_IC(UniMod:4)DPYAWLEDPDSEQTK_2	1/P48147	1	y	5	light
1/P27487	484.258	613.283	17.5	1459711_y5_1_IQLSDYTK_2	-1	3016.6	104624_IQLSDYTK_2	0	IQLSDYTK	y5/0.000	IQLSDYTK	2	104624_IQLSDYTK_2	1/P27487	1	y	5	light
1/P27487	484.258	854.425	17.5	1459714_y7_1_IQLSDYTK_2	-1	1578.2	104624_IQLSDYTK_2	0	IQLSDYTK	y7/0.007	IQLSDYTK	2	104624_IQLSDYTK_2	1/P27487	1	y	7	light
1/P27487	484.258	355.234	17.5	1459708_b3_1_IQLSDYTK_2	-1	609.6	104624_IQLSDYTK_2	0	IQLSDYTK	b3/0.001	IQLSDYTK	2	104624_IQLSDYTK_2	1/P27487	1	b	3	light
1/P27487	484.258	411.224	17.5	1459709_y3_1_IQLSDYTK_2	-1	1422.8	104624_IQLSDYTK_2	0	IQLSDYTK	y3/0.001,b7^2/0.020	IQLSDYTK	2	104624_IQLSDYTK_2	1/P27487	1	y	3	light
1/P27487	484.258	526.251	17.5	1459710_y4_1_IQLSDYTK_2	-1	641.9	104624_IQLSDYTK_2	0	IQLSDYTK	y4/0.006	IQLSDYTK	2	104624_IQLSDYTK_2	1/P27487	1	y	4	light
1/P27487	484.258	726.367	17.5	1459712_y6_1_IQLSDYTK_2	-1	10000	104624_IQLSDYTK_2	0	IQLSDYTK	y6/0.005	IQLSDYTK	2	104624_IQLSDYTK_2	1/P27487	1	y	6	light
1/P08582	770.33	1393.55	-26.5	1603821_LC(UniMod:4)RGDSSGEGVC(UniMod:4)DK_2	-1	839.2	104668_LC(UniMod:4)RGDSSGEGVC(UniMod:4)DK_2	0	LCRGDSSGEGVCDK	b13/-0.012	LC(UniMod:4)RGDSSGEGVC(UniMod:4)DK	2	104668_LC(UniMod:4)RGDSSGEGVC(UniMod:4)DK_2	1/P08582	1	b	-1	light
1/P08582	770.33	962.4	-26.5	1603816_LC(UniMod:4)RGDSSGEGVC(UniMod:4)DK_2	-1	766.1	104668_LC(UniMod:4)RGDSSGEGVC(UniMod:4)DK_2	0	LCRGDSSGEGVCDK	b9/0.016,y10-91/0.010	LC(UniMod:4)RGDSSGEGVC(UniMod:4)DK	2	104668_LC(UniMod:4)RGDSSGEGVC(UniMod:4)DK_2	1/P08582	1	b	-1	light
1/P08582	770.33	602.272	-26.5	1603813_LC(UniMod:4)RGDSSGEGVC(UniMod:4)DK_2	-1	1320.6	104668_LC(UniMod:4)RGDSSGEGVC(UniMod:4)DK_2	0	LCRGDSSGEGVCDK	b5/-0.011	LC(UniMod:4)RGDSSGEGVC(UniMod:4)DK	2	104668_LC(UniMod:4)RGDSSGEGVC(UniMod:4)DK_2	1/P08582	1	b	-1	light
1/P08582	770.33	1118.49	-26.5	1603819_LC(UniMod:4)RGDSSGEGVC(UniMod:4)DK_2	-1	706.9	104668_LC(UniMod:4)RGDSSGEGVC(UniMod:4)DK_2	0	LCRGDSSGEGVCDK	b11/-0.006	LC(UniMod:4)RGDSSGEGVC(UniMod:4)DK	2	104668_LC(UniMod:4)RGDSSGEGVC(UniMod:4)DK_2	1/P08582	1	b	-1	light
1/P08582	770.33	422.17	-26.5	1603810_LC(UniMod:4)RGDSSGEGVC(UniMod:4)DK_2	-1	967.7	104668_LC(UniMod:4)RGDSSGEGVC(UniMod:4)DK_2	0	LCRGDSSGEGVCDK	y3/-0.006	LC(UniMod:4)RGDSSGEGVC(UniMod:4)DK	2	104668_LC(UniMod:4)RGDSSGEGVC(UniMod:4)DK_2	1/P08582	1	y	-1	light
1/P08582	770.33	938.388	-26.5	1603815_LC(UniMod:4)RGDSSGEGVC(UniMod:4)DK_2	-1	795.2	104668_LC(UniMod:4)RGDSSGEGVC(UniMod:4)DK_2	0	LCRGDSSGEGVCDK	y9/-0.008	LC(UniMod:4)RGDSSGEGVC(UniMod:4)DK	2	104668_LC(UniMod:4)RGDSSGEGVC(UniMod:4)DK_2	1/P08582	1	y	-1	light
1/P08582	531.247	602.272	-1	1603831_LC(UniMod:4)RGDSSGEGVC(UniMod:4)DKSPLER_4	-1	1495.6	104669_LC(UniMod:4)RGDSSGEGVC(UniMod:4)DKSPLER_4	0	LCRGDSSGEGVCDKSPLER	b5/0.005,y17-44^3/-0.016	LC(UniMod:4)RGDSSGEGVC(UniMod:4)DKSPLER	4	104669_LC(UniMod:4)RGDSSGEGVC(UniMod:4)DKSPLER_4	1/P08582	1	b	-1	light
1/P08582	531.247	673.822	-1	1603833_LC(UniMod:4)RGDSSGEGVC(UniMod:4)DKSPLER_4	-1	1912.7	104669_LC(UniMod:4)RGDSSGEGVC(UniMod:4)DKSPLER_4	0	LCRGDSSGEGVCDKSPLER	y12^2/-0.000	LC(UniMod:4)RGDSSGEGVC(UniMod:4)DKSPLER	4	104669_LC(UniMod:4)RGDSSGEGVC(UniMod:4)DKSPLER_4	1/P08582	2	y	-1	light
1/P08582	531.247	601.33	-1	1603830_LC(UniMod:4)RGDSSGEGVC(UniMod:4)DKSPLER_4	-1	1855.6	104669_LC(UniMod:4)RGDSSGEGVC(UniMod:4)DKSPLER_4	0	LCRGDSSGEGVCDKSPLER	y5/0.001	LC(UniMod:4)RGDSSGEGVC(UniMod:4)DKSPLER	4	104669_LC(UniMod:4)RGDSSGEGVC(UniMod:4)DKSPLER_4	1/P08582	1	y	-1	light
1/P08582	531.247	729.425	-1	1603836_LC(UniMod:4)RGDSSGEGVC(UniMod:4)DKSPLER_4	-1	1203.5	104669_LC(UniMod:4)RGDSSGEGVC(UniMod:4)DKSPLER_4	0	LCRGDSSGEGVCDKSPLER	y6/0.003	LC(UniMod:4)RGDSSGEGVC(UniMod:4)DKSPLER	4	104669_LC(UniMod:4)RGDSSGEGVC(UniMod:4)DKSPLER_4	1/P08582	1	y	-1	light
1/P08582	531.247	514.298	-1	1603827_LC(UniMod:4)RGDSSGEGVC(UniMod:4)DKSPLER_4	-1	2178.7	104669_LC(UniMod:4)RGDSSGEGVC(UniMod:4)DKSPLER_4	0	LCRGDSSGEGVCDKSPLER	y4/0.004	LC(UniMod:4)RGDSSGEGVC(UniMod:4)DKSPLER	4	104669_LC(UniMod:4)RGDSSGEGVC(UniMod:4)DKSPLER_4	1/P08582	1	y	-1	light
1/P08582	531.247	580.79	-1	1603829_LC(UniMod:4)RGDSSGEGVC(UniMod:4)DKSPLER_4	-1	1988.6	104669_LC(UniMod:4)RGDSSGEGVC(UniMod:4)DKSPLER_4	0	LCRGDSSGEGVCDKSPLER	y10^2/0.002	LC(UniMod:4)RGDSSGEGVC(UniMod:4)DKSPLER	4	104669_LC(UniMod:4)RGDSSGEGVC(UniMod:4)DKSPLER_4	1/P08582	2	y	-1	light
1/Q8TF72	481.929	585.833	9.7	1603874_LC(UniMod:4)RPQANSLGSLK_3	-1	1598.2	104671_LC(UniMod:4)RPQANSLGSLK_3	0	LCRPQANSLGSLK	y11^2/0.008	LC(UniMod:4)RPQANSLGSLK	3	104671_LC(UniMod:4)RPQANSLGSLK_3	1/Q8TF72	2	y	-1	light
1/Q8TF72	481.929	604.366	9.7	1603875_LC(UniMod:4)RPQANSLGSLK_3	-1	958.1	104671_LC(UniMod:4)RPQANSLGSLK_3	0	LCRPQANSLGSLK	y6/0.002	LC(UniMod:4)RPQANSLGSLK	3	104671_LC(UniMod:4)RPQANSLGSLK_3	1/Q8TF72	1	y	-1	light
1/Q8TF72	481.929	726.372	9.7	1603879_LC(UniMod:4)RPQANSLGSLK_3	-1	952.7	104671_LC(UniMod:4)RPQANSLGSLK_3	0	LCRPQANSLGSLK	b6/-0.003	LC(UniMod:4)RPQANSLGSLK	3	104671_LC(UniMod:4)RPQANSLGSLK_3	1/Q8TF72	1	b	-1	light
1/Q8TF72	481.929	665.848	9.7	1603877_LC(UniMod:4)RPQANSLGSLK_3	-1	5350.8	104671_LC(UniMod:4)RPQANSLGSLK_3	0	LCRPQANSLGSLK	y12^2/0.006	LC(UniMod:4)RPQANSLGSLK	3	104671_LC(UniMod:4)RPQANSLGSLK_3	1/Q8TF72	2	y	-1	light
1/Q8TF72	481.929	655.334	9.7	1603876_LC(UniMod:4)RPQANSLGSLK_3	-1	896.5	104671_LC(UniMod:4)RPQANSLGSLK_3	0	LCRPQANSLGSLK	b5/-0.001	LC(UniMod:4)RPQANSLGSLK	3	104671_LC(UniMod:4)RPQANSLGSLK_3	1/Q8TF72	1	b	-1	light
1/Q8TF72	481.929	404.25	9.7	1603868_LC(UniMod:4)RPQANSLGSLK_3	-1	1332.4	104671_LC(UniMod:4)RPQANSLGSLK_3	0	LCRPQANSLGSLK	y4/-0.003	LC(UniMod:4)RPQANSLGSLK	3	104671_LC(UniMod:4)RPQANSLGSLK_3	1/Q8TF72	1	y	-1	light
1/Q8NCC3	698.332	918.453	41.5	101103_y9_1_IC(UniMod:4)FGDGDGTVNLK_2	-1	1389.8	10473_IC(UniMod:4)FGDGDGTVNLK_2	0	ICFGDGDGTVNLK	y9/0.010	IC(UniMod:4)FGDGDGTVNLK	2	10473_IC(UniMod:4)FGDGDGTVNLK_2	1/Q8NCC3	1	y	9	light
1/Q8NCC3	698.332	641.79	41.5	101100_y12_2_IC(UniMod:4)FGDGDGTVNLK_2	-1	1234.8	10473_IC(UniMod:4)FGDGDGTVNLK_2	0	ICFGDGDGTVNLK	y12^2/-0.004	IC(UniMod:4)FGDGDGTVNLK	2	10473_IC(UniMod:4)FGDGDGTVNLK_2	1/Q8NCC3	2	y	12	light
1/Q8NCC3	698.332	631.377	41.5	101099_y6_1_IC(UniMod:4)FGDGDGTVNLK_2	-1	2293.4	10473_IC(UniMod:4)FGDGDGTVNLK_2	0	ICFGDGDGTVNLK	y6/0.011	IC(UniMod:4)FGDGDGTVNLK	2	10473_IC(UniMod:4)FGDGDGTVNLK_2	1/Q8NCC3	1	y	6	light
1/Q8NCC3	698.332	975.474	41.5	101104_y10_1_IC(UniMod:4)FGDGDGTVNLK_2	-1	5443.4	10473_IC(UniMod:4)FGDGDGTVNLK_2	0	ICFGDGDGTVNLK	y10/0.015	IC(UniMod:4)FGDGDGTVNLK	2	10473_IC(UniMod:4)FGDGDGTVNLK_2	1/Q8NCC3	1	y	10	light
1/Q8NCC3	698.332	803.426	41.5	101102_y8_1_IC(UniMod:4)FGDGDGTVNLK_2	-1	2565.9	10473_IC(UniMod:4)FGDGDGTVNLK_2	0	ICFGDGDGTVNLK	y8/0.014	IC(UniMod:4)FGDGDGTVNLK	2	10473_IC(UniMod:4)FGDGDGTVNLK_2	1/Q8NCC3	1	y	8	light
1/Q8NCC3	698.332	374.24	41.5	101094_y3_1_IC(UniMod:4)FGDGDGTVNLK_2	-1	2474.3	10473_IC(UniMod:4)FGDGDGTVNLK_2	0	ICFGDGDGTVNLK	y3/-0.000	IC(UniMod:4)FGDGDGTVNLK	2	10473_IC(UniMod:4)FGDGDGTVNLK_2	1/Q8NCC3	1	y	3	light
1/P00736	782.35	1322.55	13.4	1464236_y9_1_IQYYC(UniMod:4)HEPYYK_2	-1	375.1	104949_IQYYC(UniMod:4)HEPYYK_2	0	IQYYCHEPYYK	y9/0.015	IQYYC(UniMod:4)HEPYYK	2	104949_IQYYC(UniMod:4)HEPYYK_2	1/P00736	1	y	9	light
1/P00736	782.35	996.424	13.4	1464233_y7_1_IQYYC(UniMod:4)HEPYYK_2	-1	254	104949_IQYYC(UniMod:4)HEPYYK_2	0	IQYYCHEPYYK	y7/0.014	IQYYC(UniMod:4)HEPYYK	2	104949_IQYYC(UniMod:4)HEPYYK_2	1/P00736	1	y	7	light
1/P00736	782.35	1159.49	13.4	1464234_y8_1_IQYYC(UniMod:4)HEPYYK_2	-1	281	104949_IQYYC(UniMod:4)HEPYYK_2	0	IQYYCHEPYYK	y8/-0.007	IQYYC(UniMod:4)HEPYYK	2	104949_IQYYC(UniMod:4)HEPYYK_2	1/P00736	1	y	8	light
1/P00736	782.35	405.213	13.4	1464222_b3_1_IQYYC(UniMod:4)HEPYYK_2	-1	254	104949_IQYYC(UniMod:4)HEPYYK_2	0	IQYYCHEPYYK	b3/0.000	IQYYC(UniMod:4)HEPYYK	2	104949_IQYYC(UniMod:4)HEPYYK_2	1/P00736	1	b	3	light
1/P00736	782.35	994.409	13.4	1464232_b7_1_IQYYC(UniMod:4)HEPYYK_2	-1	366.1	104949_IQYYC(UniMod:4)HEPYYK_2	0	IQYYCHEPYYK	b7/-0.002	IQYYC(UniMod:4)HEPYYK	2	104949_IQYYC(UniMod:4)HEPYYK_2	1/P00736	1	b	7	light
1/P00736	782.35	570.292	13.4	1464226_y4_1_IQYYC(UniMod:4)HEPYYK_2	-1	930.8	104949_IQYYC(UniMod:4)HEPYYK_2	0	IQYYCHEPYYK	y4/0.008	IQYYC(UniMod:4)HEPYYK	2	104949_IQYYC(UniMod:4)HEPYYK_2	1/P00736	1	y	4	light
1/P00736	521.903	725.808	13.5	1464249_y10_2_IQYYC(UniMod:4)HEPYYK_3	-1	1280.9	104950_IQYYC(UniMod:4)HEPYYK_3	0	IQYYCHEPYYK	y10^2/0.002	IQYYC(UniMod:4)HEPYYK	3	104950_IQYYC(UniMod:4)HEPYYK_3	1/P00736	2	y	10	light
1/P00736	521.903	996.424	13.5	1464251_y7_1_IQYYC(UniMod:4)HEPYYK_3	-1	712.6	104950_IQYYC(UniMod:4)HEPYYK_3	0	IQYYCHEPYYK	y7/-0.012	IQYYC(UniMod:4)HEPYYK	3	104950_IQYYC(UniMod:4)HEPYYK_3	1/P00736	1	y	7	light
1/P00736	521.903	570.292	13.5	1464244_y4_1_IQYYC(UniMod:4)HEPYYK_3	-1	2870.7	104950_IQYYC(UniMod:4)HEPYYK_3	0	IQYYCHEPYYK	y4/0.000	IQYYC(UniMod:4)HEPYYK	3	104950_IQYYC(UniMod:4)HEPYYK_3	1/P00736	1	y	4	light
1/P00736	521.903	661.779	13.5	1464247_y9_2_IQYYC(UniMod:4)HEPYYK_3	-1	5340.6	104950_IQYYC(UniMod:4)HEPYYK_3	0	IQYYCHEPYYK	y9^2/-0.001	IQYYC(UniMod:4)HEPYYK	3	104950_IQYYC(UniMod:4)HEPYYK_3	1/P00736	2	y	9	light
1/P00736	521.903	836.394	13.5	1464250_y6_1_IQYYC(UniMod:4)HEPYYK_3	-1	565.4	104950_IQYYC(UniMod:4)HEPYYK_3	0	IQYYCHEPYYK	y6/0.001	IQYYC(UniMod:4)HEPYYK	3	104950_IQYYC(UniMod:4)HEPYYK_3	1/P00736	1	y	6	light
1/P00736	521.903	580.247	13.5	1464245_y8_2_IQYYC(UniMod:4)HEPYYK_3	-1	703.3	104950_IQYYC(UniMod:4)HEPYYK_3	0	IQYYCHEPYYK	y8^2/0.001	IQYYC(UniMod:4)HEPYYK	3	104950_IQYYC(UniMod:4)HEPYYK_3	1/P00736	2	y	8	light
1/Q8IVS2	938.809	1386.67	83.2	1464355_b13_1_IRAEAMQEASEAVPSGMLSVLGQPQSK_3	-1	4140.6	104954_IRAEAMQEASEAVPSGMLSVLGQPQSK_3	0	IRAEAMQEASEAVPSGMLSVLGQPQSK	[b13/0.017]	IRAEAMQEASEAVPSGMLSVLGQPQSK	3	104954_IRAEAMQEASEAVPSGMLSVLGQPQSK_3	1/Q8IVS2	1	b	13	light
1/Q8IVS2	938.809	459.256	83.2	1464324_y4_1_IRAEAMQEASEAVPSGMLSVLGQPQSK_3	-1	10000	104954_IRAEAMQEASEAVPSGMLSVLGQPQSK_3	0	IRAEAMQEASEAVPSGMLSVLGQPQSK	y4/0.004	IRAEAMQEASEAVPSGMLSVLGQPQSK	3	104954_IRAEAMQEASEAVPSGMLSVLGQPQSK_3	1/Q8IVS2	1	y	4	light
1/Q8IVS2	938.809	943.521	83.2	1464344_y9_1_IRAEAMQEASEAVPSGMLSVLGQPQSK_3	-1	3604.8	104954_IRAEAMQEASEAVPSGMLSVLGQPQSK_3	0	IRAEAMQEASEAVPSGMLSVLGQPQSK	y9/-0.004	IRAEAMQEASEAVPSGMLSVLGQPQSK	3	104954_IRAEAMQEASEAVPSGMLSVLGQPQSK_3	1/Q8IVS2	1	y	9	light
1/Q8IVS2	938.809	757.42	83.2	1464339_y7_1_IRAEAMQEASEAVPSGMLSVLGQPQSK_3	-1	4156	104954_IRAEAMQEASEAVPSGMLSVLGQPQSK_3	0	IRAEAMQEASEAVPSGMLSVLGQPQSK	y7/0.009	IRAEAMQEASEAVPSGMLSVLGQPQSK	3	104954_IRAEAMQEASEAVPSGMLSVLGQPQSK_3	1/Q8IVS2	1	y	7	light
1/Q8IVS2	938.809	644.336	83.2	1464335_y6_1_IRAEAMQEASEAVPSGMLSVLGQPQSK_3	-1	5810.5	104954_IRAEAMQEASEAVPSGMLSVLGQPQSK_3	0	IRAEAMQEASEAVPSGMLSVLGQPQSK	y6/0.005,a6/-0.013,y13-44^2/-0.017	IRAEAMQEASEAVPSGMLSVLGQPQSK	3	104954_IRAEAMQEASEAVPSGMLSVLGQPQSK_3	1/Q8IVS2	1	y	6	light
1/Q8IVS2	938.809	1428.75	83.2	1464356_y14_1_IRAEAMQEASEAVPSGMLSVLGQPQSK_3	-1	5137.1	104954_IRAEAMQEASEAVPSGMLSVLGQPQSK_3	0	IRAEAMQEASEAVPSGMLSVLGQPQSK	[y14/-0.008]	IRAEAMQEASEAVPSGMLSVLGQPQSK	3	104954_IRAEAMQEASEAVPSGMLSVLGQPQSK_3	1/Q8IVS2	1	y	14	light
1/Q8IVS2	704.359	672.35	83.4	1464368_b6_1_IRAEAMQEASEAVPSGMLSVLGQPQSK_4	-1	3142.4	104955_IRAEAMQEASEAVPSGMLSVLGQPQSK_4	0	IRAEAMQEASEAVPSGMLSVLGQPQSK	b6/0.003,y20^3/0.011	IRAEAMQEASEAVPSGMLSVLGQPQSK	4	104955_IRAEAMQEASEAVPSGMLSVLGQPQSK_4	1/Q8IVS2	1	b	6	light
1/Q8IVS2	704.359	714.879	83.4	1464370_y14_2_IRAEAMQEASEAVPSGMLSVLGQPQSK_4	-1	2913.1	104955_IRAEAMQEASEAVPSGMLSVLGQPQSK_4	0	IRAEAMQEASEAVPSGMLSVLGQPQSK	y14^2/0.001	IRAEAMQEASEAVPSGMLSVLGQPQSK	4	104955_IRAEAMQEASEAVPSGMLSVLGQPQSK_4	1/Q8IVS2	2	y	14	light
1/Q8IVS2	704.359	644.336	83.4	1464367_y6_1_IRAEAMQEASEAVPSGMLSVLGQPQSK_4	-1	10000	104955_IRAEAMQEASEAVPSGMLSVLGQPQSK_4	0	IRAEAMQEASEAVPSGMLSVLGQPQSK	y6/0.003,a6/-0.016,y13-44^2/-0.019	IRAEAMQEASEAVPSGMLSVLGQPQSK	4	104955_IRAEAMQEASEAVPSGMLSVLGQPQSK_4	1/Q8IVS2	1	y	6	light
1/Q8IVS2	704.359	541.309	83.4	1464363_b5_1_IRAEAMQEASEAVPSGMLSVLGQPQSK_4	-1	2902.5	104955_IRAEAMQEASEAVPSGMLSVLGQPQSK_4	0	IRAEAMQEASEAVPSGMLSVLGQPQSK	b5/0.000,y5-46/0.000	IRAEAMQEASEAVPSGMLSVLGQPQSK	4	104955_IRAEAMQEASEAVPSGMLSVLGQPQSK_4	1/Q8IVS2	1	b	5	light
1/Q8IVS2	704.359	757.42	83.4	1464371_y7_1_IRAEAMQEASEAVPSGMLSVLGQPQSK_4	-1	4418.6	104955_IRAEAMQEASEAVPSGMLSVLGQPQSK_4	0	IRAEAMQEASEAVPSGMLSVLGQPQSK	y7/-0.003	IRAEAMQEASEAVPSGMLSVLGQPQSK	4	104955_IRAEAMQEASEAVPSGMLSVLGQPQSK_4	1/Q8IVS2	1	y	7	light
1/Q8IVS2	704.359	459.256	83.4	1464359_y4_1_IRAEAMQEASEAVPSGMLSVLGQPQSK_4	-1	7809.6	104955_IRAEAMQEASEAVPSGMLSVLGQPQSK_4	0	IRAEAMQEASEAVPSGMLSVLGQPQSK	y4/0.001	IRAEAMQEASEAVPSGMLSVLGQPQSK	4	104955_IRAEAMQEASEAVPSGMLSVLGQPQSK_4	1/Q8IVS2	1	y	4	light
1/Q9NZD8	817.093	795.472	119.3	1464984_b7_1_IRDIPVTIMDVFDQSALSTEAK_3	-1	5906.5	104990_IRDIPVTIMDVFDQSALSTEAK_3	0	IRDIPVTIMDVFDQSALSTEAK	b7/-0.006,m2:8/-0.006	IRDIPVTIMDVFDQSALSTEAK	3	104990_IRDIPVTIMDVFDQSALSTEAK_3	1/Q9NZD8	1	b	7	light
1/Q9NZD8	817.093	448.24	119.3	1464974_y4_1_IRDIPVTIMDVFDQSALSTEAK_3	-1	5339.2	104990_IRDIPVTIMDVFDQSALSTEAK_3	0	IRDIPVTIMDVFDQSALSTEAK	y4/0.004	IRDIPVTIMDVFDQSALSTEAK	3	104990_IRDIPVTIMDVFDQSALSTEAK_3	1/Q9NZD8	1	y	4	light
1/Q9NZD8	817.093	1154.62	119.3	1464992_b10_1_IRDIPVTIMDVFDQSALSTEAK_3	-1	8052.1	104990_IRDIPVTIMDVFDQSALSTEAK_3	0	IRDIPVTIMDVFDQSALSTEAK	b10/-0.008	IRDIPVTIMDVFDQSALSTEAK	3	104990_IRDIPVTIMDVFDQSALSTEAK_3	1/Q9NZD8	1	b	10	light
1/Q9NZD8	817.093	1049.51	119.3	1464990_y10_1_IRDIPVTIMDVFDQSALSTEAK_3	-1	5820.6	104990_IRDIPVTIMDVFDQSALSTEAK_3	0	IRDIPVTIMDVFDQSALSTEAK	[y10/-0.012]	IRDIPVTIMDVFDQSALSTEAK	3	104990_IRDIPVTIMDVFDQSALSTEAK_3	1/Q9NZD8	1	y	10	light
1/Q9NZD8	817.093	535.272	119.3	1464976_y5_1_IRDIPVTIMDVFDQSALSTEAK_3	-1	7679.7	104990_IRDIPVTIMDVFDQSALSTEAK_3	0	IRDIPVTIMDVFDQSALSTEAK	y5/-0.008	IRDIPVTIMDVFDQSALSTEAK	3	104990_IRDIPVTIMDVFDQSALSTEAK_3	1/Q9NZD8	1	y	5	light
1/Q9NZD8	817.093	1196.58	119.3	1464994_y11_1_IRDIPVTIMDVFDQSALSTEAK_3	-1	6451.6	104990_IRDIPVTIMDVFDQSALSTEAK_3	0	IRDIPVTIMDVFDQSALSTEAK	y11/-0.000	IRDIPVTIMDVFDQSALSTEAK	3	104990_IRDIPVTIMDVFDQSALSTEAK_3	1/Q9NZD8	1	y	11	light
1/P49327	616.262	669.277	-3.8	823_y5_1_AFDTAGNGYC(UniMod:4)R_2	-1	1395.7	105_AFDTAGNGYC(UniMod:4)R_2	0	AFDTAGNGYCR	y5/0.018	AFDTAGNGYC(UniMod:4)R	2	105_AFDTAGNGYC(UniMod:4)R_2	1/P49327	1	y	5	light
1/P49327	616.262	506.225	-3.8	820_b5_1_AFDTAGNGYC(UniMod:4)R_2	-1	1046.7	105_AFDTAGNGYC(UniMod:4)R_2	0	AFDTAGNGYCR	b5/0.011	AFDTAGNGYC(UniMod:4)R	2	105_AFDTAGNGYC(UniMod:4)R_2	1/P49327	1	b	5	light
1/P49327	616.262	726.299	-3.8	825_y6_1_AFDTAGNGYC(UniMod:4)R_2	-1	9281.1	105_AFDTAGNGYC(UniMod:4)R_2	0	AFDTAGNGYCR	y6/0.019	AFDTAGNGYC(UniMod:4)R	2	105_AFDTAGNGYC(UniMod:4)R_2	1/P49327	1	y	6	light
1/P49327	616.262	498.213	-3.8	819_y3_1_AFDTAGNGYC(UniMod:4)R_2	-1	418.7	105_AFDTAGNGYC(UniMod:4)R_2	0	AFDTAGNGYCR	y3/0.008,y9-18^2/0.017	AFDTAGNGYC(UniMod:4)R	2	105_AFDTAGNGYC(UniMod:4)R_2	1/P49327	1	y	3	light
1/P49327	616.262	555.234	-3.8	821_y4_1_AFDTAGNGYC(UniMod:4)R_2	-1	2980.6	105_AFDTAGNGYC(UniMod:4)R_2	0	AFDTAGNGYCR	y4/0.011	AFDTAGNGYC(UniMod:4)R	2	105_AFDTAGNGYC(UniMod:4)R_2	1/P49327	1	y	4	light
1/P49327	616.262	435.187	-3.8	818_b4_1_AFDTAGNGYC(UniMod:4)R_2	-1	1639.9	105_AFDTAGNGYC(UniMod:4)R_2	0	AFDTAGNGYCR	b4/0.006,a9^2/0.000,m2:5/0.006	AFDTAGNGYC(UniMod:4)R	2	105_AFDTAGNGYC(UniMod:4)R_2	1/P49327	1	b	4	light
1/P48147	407.516	700.341	-9.2	6818_y5_1_GGGEYGETWHK_3	-1	2297.3	1051_GGGEYGETWHK_3	0	GGGEYGETWHK	y5/0.015	GGGEYGETWHK	3	1051_GGGEYGETWHK_3	1/P48147	1	y	5	light
1/P48147	407.516	470.251	-9.2	6814_y3_1_GGGEYGETWHK_3	-1	2231.1	1051_GGGEYGETWHK_3	0	GGGEYGETWHK	y3/0.003	GGGEYGETWHK	3	1051_GGGEYGETWHK_3	1/P48147	1	y	3	light
1/P48147	407.516	571.299	-9.2	6816_y4_1_GGGEYGETWHK_3	-1	4312.1	1051_GGGEYGETWHK_3	0	GGGEYGETWHK	y4/0.008	GGGEYGETWHK	3	1051_GGGEYGETWHK_3	1/P48147	1	y	4	light
1/P48147	407.516	757.363	-9.2	6819_y6_1_GGGEYGETWHK_3	-1	8748.7	1051_GGGEYGETWHK_3	0	GGGEYGETWHK	y6/0.012	GGGEYGETWHK	3	1051_GGGEYGETWHK_3	1/P48147	1	y	6	light
1/P48147	407.516	920.426	-9.2	6820_y7_1_GGGEYGETWHK_3	-1	2892.7	1051_GGGEYGETWHK_3	0	GGGEYGETWHK	y7/0.011	GGGEYGETWHK	3	1051_GGGEYGETWHK_3	1/P48147	1	y	7	light
1/P48147	407.516	553.749	-9.2	6815_y9_2_GGGEYGETWHK_3	-1	2922.8	1051_GGGEYGETWHK_3	0	GGGEYGETWHK	y9^2/0.006	GGGEYGETWHK	3	1051_GGGEYGETWHK_3	1/P48147	2	y	9	light
1/P48147	978.147	923.458	102.6	1610687_LDGSHPAFLYGYGGFNISITPNYSVSR_3	-1	8199.4	105137_LDGSHPAFLYGYGGFNISITPNYSVSR_3	0	LDGSHPAFLYGYGGFNISITPNYSVSR	[y8/-0.019]	LDGSHPAFLYGYGGFNISITPNYSVSR	3	105137_LDGSHPAFLYGYGGFNISITPNYSVSR_3	1/P48147	1	y	-1	light
1/P48147	978.147	1123.57	102.6	1610690_LDGSHPAFLYGYGGFNISITPNYSVSR_3	-1	6639	105137_LDGSHPAFLYGYGGFNISITPNYSVSR_3	0	LDGSHPAFLYGYGGFNISITPNYSVSR	y10/0.007	LDGSHPAFLYGYGGFNISITPNYSVSR	3	105137_LDGSHPAFLYGYGGFNISITPNYSVSR_3	1/P48147	1	y	-1	light
1/P48147	978.147	938.473	102.6	1610689_LDGSHPAFLYGYGGFNISITPNYSVSR_3	-1	4330.1	105137_LDGSHPAFLYGYGGFNISITPNYSVSR_3	0	LDGSHPAFLYGYGGFNISITPNYSVSR	b9/0.005	LDGSHPAFLYGYGGFNISITPNYSVSR	3	105137_LDGSHPAFLYGYGGFNISITPNYSVSR_3	1/P48147	1	b	-1	light
1/P48147	978.147	822.41	102.6	1610685_LDGSHPAFLYGYGGFNISITPNYSVSR_3	-1	7474.7	105137_LDGSHPAFLYGYGGFNISITPNYSVSR_3	0	LDGSHPAFLYGYGGFNISITPNYSVSR	y7/-0.002	LDGSHPAFLYGYGGFNISITPNYSVSR	3	105137_LDGSHPAFLYGYGGFNISITPNYSVSR_3	1/P48147	1	y	-1	light
1/P48147	978.147	510.231	102.6	1610681_LDGSHPAFLYGYGGFNISITPNYSVSR_3	-1	3740.9	105137_LDGSHPAFLYGYGGFNISITPNYSVSR_3	0	LDGSHPAFLYGYGGFNISITPNYSVSR	b5/-0.004	LDGSHPAFLYGYGGFNISITPNYSVSR	3	105137_LDGSHPAFLYGYGGFNISITPNYSVSR_3	1/P48147	1	b	-1	light
1/P48147	978.147	825.389	102.6	1610686_LDGSHPAFLYGYGGFNISITPNYSVSR_3	-1	5851.1	105137_LDGSHPAFLYGYGGFNISITPNYSVSR_3	0	LDGSHPAFLYGYGGFNISITPNYSVSR	b8/-0.007,m2:9/-0.007	LDGSHPAFLYGYGGFNISITPNYSVSR	3	105137_LDGSHPAFLYGYGGFNISITPNYSVSR_3	1/P48147	1	b	-1	light
1/Q9Y6Y8	670.314	835.383	6.6	101465_b7_1_IDENYSLPTC(UniMod:4)K_2	-1	1506.7	10514_IDENYSLPTC(UniMod:4)K_2	0	IDENYSLPTCK	b7/-0.005	IDENYSLPTC(UniMod:4)K	2	10514_IDENYSLPTC(UniMod:4)K_2	1/Q9Y6Y8	1	b	7	light
1/Q9Y6Y8	670.314	505.244	6.6	101460_y4_1_IDENYSLPTC(UniMod:4)K_2	-1	8193	10514_IDENYSLPTC(UniMod:4)K_2	0	IDENYSLPTCK	y4/0.006	IDENYSLPTC(UniMod:4)K	2	10514_IDENYSLPTC(UniMod:4)K_2	1/Q9Y6Y8	1	y	4	light
1/Q9Y6Y8	670.314	1226.54	6.6	101468_y10_1_IDENYSLPTC(UniMod:4)K_2	-1	1401.8	10514_IDENYSLPTC(UniMod:4)K_2	0	IDENYSLPTCK	y10/0.009	IDENYSLPTC(UniMod:4)K	2	10514_IDENYSLPTC(UniMod:4)K_2	1/Q9Y6Y8	1	y	10	light
1/Q9Y6Y8	670.314	408.191	6.6	101457_y3_1_IDENYSLPTC(UniMod:4)K_2	-1	1506.7	10514_IDENYSLPTC(UniMod:4)K_2	0	IDENYSLPTCK	y3/0.003	IDENYSLPTC(UniMod:4)K	2	10514_IDENYSLPTC(UniMod:4)K_2	1/Q9Y6Y8	1	y	3	light
1/Q9Y6Y8	670.314	705.36	6.6	101463_y6_1_IDENYSLPTC(UniMod:4)K_2	-1	5789.5	10514_IDENYSLPTC(UniMod:4)K_2	0	IDENYSLPTCK	y6/0.007	IDENYSLPTC(UniMod:4)K	2	10514_IDENYSLPTC(UniMod:4)K_2	1/Q9Y6Y8	1	y	6	light
1/Q9Y6Y8	670.314	618.328	6.6	101461_y5_1_IDENYSLPTC(UniMod:4)K_2	-1	1912.3	10514_IDENYSLPTC(UniMod:4)K_2	0	IDENYSLPTCK	y5/0.019	IDENYSLPTC(UniMod:4)K	2	10514_IDENYSLPTC(UniMod:4)K_2	1/Q9Y6Y8	1	y	5	light
1/Q9UHL4	539.259	425.204	14.7	1611022_LDHFNFER_2	-1	2225.4	105161_LDHFNFER_2	0	LDHFNFER	y6^2/-0.001	LDHFNFER	2	105161_LDHFNFER_2	1/Q9UHL4	2	y	-1	light
1/Q9UHL4	539.259	849.4	14.7	1611029_LDHFNFER_2	-1	375	105161_LDHFNFER_2	0	LDHFNFER	y6/0.009	LDHFNFER	2	105161_LDHFNFER_2	1/Q9UHL4	1	y	-1	light
1/Q9UHL4	539.259	565.273	14.7	1611026_LDHFNFER_2	-1	1326.2	105161_LDHFNFER_2	0	LDHFNFER	y4/-0.007	LDHFNFER	2	105161_LDHFNFER_2	1/Q9UHL4	1	y	-1	light
1/Q9UHL4	539.259	366.177	14.7	1611021_LDHFNFER_2	-1	700.4	105161_LDHFNFER_2	0	LDHFNFER	b3/-0.002	LDHFNFER	2	105161_LDHFNFER_2	1/Q9UHL4	1	b	-1	light
1/Q9UHL4	539.259	482.717	14.7	1611024_LDHFNFER_2	-1	671	105161_LDHFNFER_2	0	LDHFNFER	y7^2/-0.002	LDHFNFER	2	105161_LDHFNFER_2	1/Q9UHL4	2	y	-1	light
1/Q9UHL4	539.259	712.341	14.7	1611027_LDHFNFER_2	-1	2659.6	105161_LDHFNFER_2	0	LDHFNFER	y5/-0.002	LDHFNFER	2	105161_LDHFNFER_2	1/Q9UHL4	1	y	-1	light
1/P52732	599.825	429.227	18.2	1612301_LDIPTGTTPQR_2	-1	7102.8	105243_LDIPTGTTPQR_2	0	LDIPTGTTPQR	y8^2/-0.003	LDIPTGTTPQR	2	105243_LDIPTGTTPQR_2	1/P52732	2	y	-1	light
1/P52732	599.825	400.23	18.2	1612300_LDIPTGTTPQR_2	-1	1909.2	105243_LDIPTGTTPQR_2	0	LDIPTGTTPQR	y3/-0.000,b8^2/0.017	LDIPTGTTPQR	2	105243_LDIPTGTTPQR_2	1/P52732	1	y	-1	light
1/P52732	599.825	485.769	18.2	1612303_LDIPTGTTPQR_2	-1	2000.8	105243_LDIPTGTTPQR_2	0	LDIPTGTTPQR	y9^2/-0.001	LDIPTGTTPQR	2	105243_LDIPTGTTPQR_2	1/P52732	2	y	-1	light
1/P52732	599.825	760.395	18.2	1612308_LDIPTGTTPQR_2	-1	3878.1	105243_LDIPTGTTPQR_2	0	LDIPTGTTPQR	y7/-0.003	LDIPTGTTPQR	2	105243_LDIPTGTTPQR_2	1/P52732	1	y	-1	light
1/P52732	599.825	857.448	18.2	1612310_LDIPTGTTPQR_2	-1	10000	105243_LDIPTGTTPQR_2	0	LDIPTGTTPQR	y8/-0.003	LDIPTGTTPQR	2	105243_LDIPTGTTPQR_2	1/P52732	1	y	-1	light
1/P52732	599.825	659.347	18.2	1612306_LDIPTGTTPQR_2	-1	3949.9	105243_LDIPTGTTPQR_2	0	LDIPTGTTPQR	y6/0.000	LDIPTGTTPQR	2	105243_LDIPTGTTPQR_2	1/P52732	1	y	-1	light
1/P04180	565.938	668.361	60.3	1612886_LDKPDVVNWMC(UniMod:4)YR_3	-1	4433.7	105277_LDKPDVVNWMC(UniMod:4)YR_3	0	LDKPDVVNWMCYR	b6/0.012	LDKPDVVNWMC(UniMod:4)YR	3	105277_LDKPDVVNWMC(UniMod:4)YR_3	1/P04180	1	b	-1	light
1/P04180	565.938	815.333	60.3	1612891_LDKPDVVNWMC(UniMod:4)YR_3	-1	5174.2	105277_LDKPDVVNWMC(UniMod:4)YR_3	0	LDKPDVVNWMCYR	y5/-0.005	LDKPDVVNWMC(UniMod:4)YR	3	105277_LDKPDVVNWMC(UniMod:4)YR_3	1/P04180	1	y	-1	light
1/P04180	565.938	767.43	60.3	1612889_LDKPDVVNWMC(UniMod:4)YR_3	-1	3559.9	105277_LDKPDVVNWMC(UniMod:4)YR_3	0	LDKPDVVNWMCYR	b7/0.002	LDKPDVVNWMC(UniMod:4)YR	3	105277_LDKPDVVNWMC(UniMod:4)YR_3	1/P04180	1	b	-1	light
1/P04180	565.938	498.213	60.3	1612880_LDKPDVVNWMC(UniMod:4)YR_3	-1	6828.5	105277_LDKPDVVNWMC(UniMod:4)YR_3	0	LDKPDVVNWMCYR	[y3/0.013]	LDKPDVVNWMC(UniMod:4)YR	3	105277_LDKPDVVNWMC(UniMod:4)YR_3	1/P04180	1	y	-1	light
1/P04180	565.938	929.376	60.3	1612893_LDKPDVVNWMC(UniMod:4)YR_3	-1	3301	105277_LDKPDVVNWMC(UniMod:4)YR_3	0	LDKPDVVNWMCYR	y6/0.019	LDKPDVVNWMC(UniMod:4)YR	3	105277_LDKPDVVNWMC(UniMod:4)YR_3	1/P04180	1	y	-1	light
1/P04180	565.938	629.253	60.3	1612884_LDKPDVVNWMC(UniMod:4)YR_3	-1	10000	105277_LDKPDVVNWMC(UniMod:4)YR_3	0	LDKPDVVNWMCYR	y4/0.006	LDKPDVVNWMC(UniMod:4)YR	3	105277_LDKPDVVNWMC(UniMod:4)YR_3	1/P04180	1	y	-1	light
1/P04180	571.269	498.213	42.9	1612897_LDKPDVVNWM(UniMod:35)C(UniMod:4)YR_3	-1	4326	105278_LDKPDVVNWM(UniMod:35)C(UniMod:4)YR_3	0	LDKPDVVNWMCYR	y3/-0.001	LDKPDVVNWM(UniMod:35)C(UniMod:4)YR	3	105278_LDKPDVVNWM(UniMod:35)C(UniMod:4)YR_3	1/P04180	1	y	-1	light
1/P04180	571.269	767.43	42.9	1612901_LDKPDVVNWM(UniMod:35)C(UniMod:4)YR_3	-1	4757.7	105278_LDKPDVVNWM(UniMod:35)C(UniMod:4)YR_3	0	LDKPDVVNWMCYR	b7/0.006	LDKPDVVNWM(UniMod:35)C(UniMod:4)YR	3	105278_LDKPDVVNWM(UniMod:35)C(UniMod:4)YR_3	1/P04180	1	b	-1	light
1/P04180	571.269	668.361	42.9	1612900_LDKPDVVNWM(UniMod:35)C(UniMod:4)YR_3	-1	5880.1	105278_LDKPDVVNWM(UniMod:35)C(UniMod:4)YR_3	0	LDKPDVVNWMCYR	b6/-0.007	LDKPDVVNWM(UniMod:35)C(UniMod:4)YR	3	105278_LDKPDVVNWM(UniMod:35)C(UniMod:4)YR_3	1/P04180	1	b	-1	light
1/P04180	571.269	645.248	42.9	1612899_LDKPDVVNWM(UniMod:35)C(UniMod:4)YR_3	-1	5833.3	105278_LDKPDVVNWM(UniMod:35)C(UniMod:4)YR_3	0	LDKPDVVNWMCYR	y4/-0.006	LDKPDVVNWM(UniMod:35)C(UniMod:4)YR	3	105278_LDKPDVVNWM(UniMod:35)C(UniMod:4)YR_3	1/P04180	1	y	-1	light
1/P04180	571.269	831.328	42.9	1612903_LDKPDVVNWM(UniMod:35)C(UniMod:4)YR_3	-1	4904	105278_LDKPDVVNWM(UniMod:35)C(UniMod:4)YR_3	0	LDKPDVVNWMCYR	y5/0.012	LDKPDVVNWM(UniMod:35)C(UniMod:4)YR	3	105278_LDKPDVVNWM(UniMod:35)C(UniMod:4)YR_3	1/P04180	1	y	-1	light
1/P04180	571.269	357.213	42.9	1612895_LDKPDVVNWM(UniMod:35)C(UniMod:4)YR_3	-1	3268.8	105278_LDKPDVVNWM(UniMod:35)C(UniMod:4)YR_3	0	LDKPDVVNWMCYR	b3/-0.011	LDKPDVVNWM(UniMod:35)C(UniMod:4)YR	3	105278_LDKPDVVNWM(UniMod:35)C(UniMod:4)YR_3	1/P04180	1	b	-1	light
1/P83111	680.354	791.917	88.4	1613267_LDLDIPVQHYVPEFPEK_3	-1	3143.1	105301_LDLDIPVQHYVPEFPEK_3	0	LDLDIPVQHYVPEFPEK	y13^2/0.006	LDLDIPVQHYVPEFPEK	3	105301_LDLDIPVQHYVPEFPEK_3	1/P83111	2	y	-1	light
1/P83111	680.354	849.43	88.4	1613269_LDLDIPVQHYVPEFPEK_3	-1	3205.7	105301_LDLDIPVQHYVPEFPEK_3	0	LDLDIPVQHYVPEFPEK	y14^2/-0.008	LDLDIPVQHYVPEFPEK	3	105301_LDLDIPVQHYVPEFPEK_3	1/P83111	2	y	-1	light
1/P83111	680.354	746.372	88.4	1613266_LDLDIPVQHYVPEFPEK_3	-1	3881.2	105301_LDLDIPVQHYVPEFPEK_3	0	LDLDIPVQHYVPEFPEK	y6/-0.002	LDLDIPVQHYVPEFPEK	3	105301_LDLDIPVQHYVPEFPEK_3	1/P83111	1	y	-1	light
1/P83111	680.354	905.972	88.4	1613270_LDLDIPVQHYVPEFPEK_3	-1	3095.3	105301_LDLDIPVQHYVPEFPEK_3	0	LDLDIPVQHYVPEFPEK	y15^2/0.004	LDLDIPVQHYVPEFPEK	3	105301_LDLDIPVQHYVPEFPEK_3	1/P83111	2	y	-1	light
1/P83111	680.354	373.208	88.4	1613258_LDLDIPVQHYVPEFPEK_3	-1	5008.5	105301_LDLDIPVQHYVPEFPEK_3	0	LDLDIPVQHYVPEFPEK	y3/-0.002	LDLDIPVQHYVPEFPEK	3	105301_LDLDIPVQHYVPEFPEK_3	1/P83111	1	y	-1	light
1/P83111	680.354	735.375	88.4	1613264_LDLDIPVQHYVPEFPEK_3	-1	7289.5	105301_LDLDIPVQHYVPEFPEK_3	0	LDLDIPVQHYVPEFPEK	y12^2/0.003	LDLDIPVQHYVPEFPEK	3	105301_LDLDIPVQHYVPEFPEK_3	1/P83111	2	y	-1	light
1/P29120	449.931	461.251	71.3	1613693_LDLHVIPVWQK_3	-1	2590.9	105328_LDLHVIPVWQK_3	0	LDLHVIPVWQK	y3/0.001,b4-18/0.001	LDLHVIPVWQK	3	105328_LDLHVIPVWQK_3	1/P29120	1	y	-1	light
1/P29120	449.931	578.33	71.3	1613698_LDLHVIPVWQK_3	-1	4005.9	105328_LDLHVIPVWQK_3	0	LDLHVIPVWQK	b5/0.002,b10-46^2/-0.006,m2:6/0.002	LDLHVIPVWQK	3	105328_LDLHVIPVWQK_3	1/P29120	1	b	-1	light
1/P29120	449.931	479.261	71.3	1613694_LDLHVIPVWQK_3	-1	1723.1	105328_LDLHVIPVWQK_3	0	LDLHVIPVWQK	b4/-0.002	LDLHVIPVWQK	3	105328_LDLHVIPVWQK_3	1/P29120	1	b	-1	light
1/P29120	449.931	657.372	71.3	1613700_LDLHVIPVWQK_3	-1	7387.9	105328_LDLHVIPVWQK_3	0	LDLHVIPVWQK	y5/-0.003	LDLHVIPVWQK	3	105328_LDLHVIPVWQK_3	1/P29120	1	y	-1	light
1/P29120	449.931	691.414	71.3	1613702_LDLHVIPVWQK_3	-1	1792	105328_LDLHVIPVWQK_3	0	LDLHVIPVWQK	b6/-0.001	LDLHVIPVWQK	3	105328_LDLHVIPVWQK_3	1/P29120	1	b	-1	light
1/P29120	449.931	560.319	71.3	1613696_LDLHVIPVWQK_3	-1	1435.9	105328_LDLHVIPVWQK_3	0	LDLHVIPVWQK	y4/0.003,y9^2/-0.015,b5-18/0.003	LDLHVIPVWQK	3	105328_LDLHVIPVWQK_3	1/P29120	1	y	-1	light
1/O00519	577.77	697.297	56.7	161465_ALLC(UniMod:4)EDMFR_2	-1	3973.9	10545_ALLC(UniMod:4)EDMFR_2	0	ALLCEDMFR	y5/0.002	ALLC(UniMod:4)EDMFR	2	10545_ALLC(UniMod:4)EDMFR_2	1/O00519	1	y	-1	light
1/O00519	577.77	568.255	56.7	161464_ALLC(UniMod:4)EDMFR_2	-1	1973.9	10545_ALLC(UniMod:4)EDMFR_2	0	ALLCEDMFR	y4/0.014	ALLC(UniMod:4)EDMFR	2	10545_ALLC(UniMod:4)EDMFR_2	1/O00519	1	y	-1	light
1/O00519	577.77	857.328	56.7	161467_ALLC(UniMod:4)EDMFR_2	-1	10000	10545_ALLC(UniMod:4)EDMFR_2	0	ALLCEDMFR	y6/-0.005	ALLC(UniMod:4)EDMFR	2	10545_ALLC(UniMod:4)EDMFR_2	1/O00519	1	y	-1	light
1/O00519	577.77	970.412	56.7	161468_ALLC(UniMod:4)EDMFR_2	-1	3359.5	10545_ALLC(UniMod:4)EDMFR_2	0	ALLCEDMFR	y7/0.017	ALLC(UniMod:4)EDMFR	2	10545_ALLC(UniMod:4)EDMFR_2	1/O00519	1	y	-1	light
1/O00519	577.77	485.71	56.7	161462_ALLC(UniMod:4)EDMFR_2	-1	4941.2	10545_ALLC(UniMod:4)EDMFR_2	0	ALLCEDMFR	y7^2/0.005	ALLC(UniMod:4)EDMFR	2	10545_ALLC(UniMod:4)EDMFR_2	1/O00519	2	y	-1	light
1/O00519	577.77	453.228	56.7	161461_ALLC(UniMod:4)EDMFR_2	-1	2836.6	10545_ALLC(UniMod:4)EDMFR_2	0	ALLCEDMFR	y3/0.012	ALLC(UniMod:4)EDMFR	2	10545_ALLC(UniMod:4)EDMFR_2	1/O00519	1	y	-1	light
1/P52948	553.59	827.375	-5	1473986_y7_1_ISEAC(UniMod:4)SLAQQSGDHR_3	-1	2197.4	105525_ISEAC(UniMod:4)SLAQQSGDHR_3	0	ISEACSLAQQSGDHR	y7/0.003	ISEAC(UniMod:4)SLAQQSGDHR	3	105525_ISEAC(UniMod:4)SLAQQSGDHR_3	1/P52948	1	y	7	light
1/P52948	553.59	699.317	-5	1473981_y6_1_ISEAC(UniMod:4)SLAQQSGDHR_3	-1	3023	105525_ISEAC(UniMod:4)SLAQQSGDHR_3	0	ISEACSLAQQSGDHR	y6/0.002	ISEAC(UniMod:4)SLAQQSGDHR	3	105525_ISEAC(UniMod:4)SLAQQSGDHR_3	1/P52948	1	y	6	light
1/P52948	553.59	665.302	-5	1473979_y12_2_ISEAC(UniMod:4)SLAQQSGDHR_3	-1	2406.7	105525_ISEAC(UniMod:4)SLAQQSGDHR_3	0	ISEACSLAQQSGDHR	y12^2/-0.008,b13-18^2/0.003	ISEAC(UniMod:4)SLAQQSGDHR	3	105525_ISEAC(UniMod:4)SLAQQSGDHR_3	1/P52948	2	y	12	light
1/P52948	553.59	898.413	-5	1473987_y8_1_ISEAC(UniMod:4)SLAQQSGDHR_3	-1	2708.5	105525_ISEAC(UniMod:4)SLAQQSGDHR_3	0	ISEACSLAQQSGDHR	y8/-0.016	ISEAC(UniMod:4)SLAQQSGDHR	3	105525_ISEAC(UniMod:4)SLAQQSGDHR_3	1/P52948	1	y	8	light
1/P52948	553.59	729.823	-5	1473982_y13_2_ISEAC(UniMod:4)SLAQQSGDHR_3	-1	4919	105525_ISEAC(UniMod:4)SLAQQSGDHR_3	0	ISEACSLAQQSGDHR	y13^2/0.000	ISEAC(UniMod:4)SLAQQSGDHR	3	105525_ISEAC(UniMod:4)SLAQQSGDHR_3	1/P52948	2	y	13	light
1/P52948	553.59	773.339	-5	1473984_y14_2_ISEAC(UniMod:4)SLAQQSGDHR_3	-1	8623.8	105525_ISEAC(UniMod:4)SLAQQSGDHR_3	0	ISEACSLAQQSGDHR	y14^2/-0.002	ISEAC(UniMod:4)SLAQQSGDHR	3	105525_ISEAC(UniMod:4)SLAQQSGDHR_3	1/P52948	2	y	14	light
1/Q9UN36	575.311	723.404	35.8	1616698_LDPTQTSFLK_2	-1	1256.1	105539_LDPTQTSFLK_2	0	LDPTQTSFLK	y6/-0.002	LDPTQTSFLK	2	105539_LDPTQTSFLK_2	1/Q9UN36	1	y	-1	light
1/Q9UN36	575.311	461.256	35.8	1616694_LDPTQTSFLK_2	-1	10000	105539_LDPTQTSFLK_2	0	LDPTQTSFLK	y8^2/0.001	LDPTQTSFLK	2	105539_LDPTQTSFLK_2	1/Q9UN36	2	y	-1	light
1/Q9UN36	575.311	595.345	35.8	1616697_LDPTQTSFLK_2	-1	936.3	105539_LDPTQTSFLK_2	0	LDPTQTSFLK	y5/-0.002	LDPTQTSFLK	2	105539_LDPTQTSFLK_2	1/Q9UN36	1	y	-1	light
1/Q9UN36	575.311	824.451	35.8	1616699_LDPTQTSFLK_2	-1	1780.8	105539_LDPTQTSFLK_2	0	LDPTQTSFLK	y7/-0.001	LDPTQTSFLK	2	105539_LDPTQTSFLK_2	1/Q9UN36	1	y	-1	light
1/Q9UN36	575.311	921.504	35.8	1616701_LDPTQTSFLK_2	-1	4466.1	105539_LDPTQTSFLK_2	0	LDPTQTSFLK	y8/0.001	LDPTQTSFLK	2	105539_LDPTQTSFLK_2	1/Q9UN36	1	y	-1	light
1/Q9UN36	575.311	494.297	35.8	1616695_LDPTQTSFLK_2	-1	528	105539_LDPTQTSFLK_2	0	LDPTQTSFLK	y4/-0.003	LDPTQTSFLK	2	105539_LDPTQTSFLK_2	1/Q9UN36	1	y	-1	light
1/P54577	632.306	1063.49	35.2	1474166_y8_1_ISEEC(UniMod:4)IAQWK_2	-1	3836.6	105541_ISEEC(UniMod:4)IAQWK_2	0	ISEECIAQWK	y8/0.000	ISEEC(UniMod:4)IAQWK	2	105541_ISEEC(UniMod:4)IAQWK_2	1/P54577	1	y	8	light
1/P54577	632.306	934.445	35.2	1474165_y7_1_ISEEC(UniMod:4)IAQWK_2	-1	3433.2	105541_ISEEC(UniMod:4)IAQWK_2	0	ISEECIAQWK	y7/-0.001	ISEEC(UniMod:4)IAQWK	2	105541_ISEEC(UniMod:4)IAQWK_2	1/P54577	1	y	7	light
1/P54577	632.306	532.288	35.2	1474156_y4_1_ISEEC(UniMod:4)IAQWK_2	-1	6100.4	105541_ISEEC(UniMod:4)IAQWK_2	0	ISEECIAQWK	y4/-0.002	ISEEC(UniMod:4)IAQWK	2	105541_ISEEC(UniMod:4)IAQWK_2	1/P54577	1	y	4	light
1/P54577	632.306	805.403	35.2	1474161_y6_1_ISEEC(UniMod:4)IAQWK_2	-1	3994	105541_ISEEC(UniMod:4)IAQWK_2	0	ISEECIAQWK	y6/-0.003	ISEEC(UniMod:4)IAQWK	2	105541_ISEEC(UniMod:4)IAQWK_2	1/P54577	1	y	6	light
1/P54577	632.306	1150.52	35.2	1474169_y9_1_ISEEC(UniMod:4)IAQWK_2	-1	5299.2	105541_ISEEC(UniMod:4)IAQWK_2	0	ISEECIAQWK	y9/0.000	ISEEC(UniMod:4)IAQWK	2	105541_ISEEC(UniMod:4)IAQWK_2	1/P54577	1	y	9	light
1/P54577	632.306	461.251	35.2	1474154_y3_1_ISEEC(UniMod:4)IAQWK_2	-1	2590	105541_ISEEC(UniMod:4)IAQWK_2	0	ISEECIAQWK	y3/-0.002	ISEEC(UniMod:4)IAQWK	2	105541_ISEEC(UniMod:4)IAQWK_2	1/P54577	1	y	3	light
1/O00519	626.358	512.303	75	1616717_LDPTVPPLPFR_2	-1	1887.6	105541_LDPTVPPLPFR_2	0	LDPTVPPLPFR	y9^2/-0.003	LDPTVPPLPFR	2	105541_LDPTVPPLPFR_2	1/O00519	2	y	-1	light
1/O00519	626.358	419.24	75	1616715_LDPTVPPLPFR_2	-1	896.4	105541_LDPTVPPLPFR_2	0	LDPTVPPLPFR	y3/0.002	LDPTVPPLPFR	2	105541_LDPTVPPLPFR_2	1/O00519	1	y	-1	light
1/O00519	626.358	363.718	75	1616714_LDPTVPPLPFR_2	-1	766.2	105541_LDPTVPPLPFR_2	0	LDPTVPPLPFR	y6^2/0.004	LDPTVPPLPFR	2	105541_LDPTVPPLPFR_2	1/O00519	2	y	-1	light
1/O00519	626.358	526.287	75	1616718_LDPTVPPLPFR_2	-1	1352.4	105541_LDPTVPPLPFR_2	0	LDPTVPPLPFR	b5/0.003	LDPTVPPLPFR	2	105541_LDPTVPPLPFR_2	1/O00519	1	b	-1	light
1/O00519	626.358	825.498	75	1616723_LDPTVPPLPFR_2	-1	810.2	105541_LDPTVPPLPFR_2	0	LDPTVPPLPFR	y7/0.002	LDPTVPPLPFR	2	105541_LDPTVPPLPFR_2	1/O00519	1	y	-1	light
1/O00519	626.358	726.43	75	1616720_LDPTVPPLPFR_2	-1	10000	105541_LDPTVPPLPFR_2	0	LDPTVPPLPFR	y6/0.001	LDPTVPPLPFR	2	105541_LDPTVPPLPFR_2	1/O00519	1	y	-1	light
1/Q8IV08	887.156	971.563	82.1	102728_y9_1_IAVSKPSGPQPQADLQALLQSGAQVR_3	-1	6059.1	10558_IAVSKPSGPQPQADLQALLQSGAQVR_3	0	IAVSKPSGPQPQADLQALLQSGAQVR	y9/-0.007	IAVSKPSGPQPQADLQALLQSGAQVR	3	10558_IAVSKPSGPQPQADLQALLQSGAQVR_3	1/Q8IV08	1	y	9	light
1/Q8IV08	887.156	1170.66	82.1	102730_y11_1_IAVSKPSGPQPQADLQALLQSGAQVR_3	-1	4827.6	10558_IAVSKPSGPQPQADLQALLQSGAQVR_3	0	IAVSKPSGPQPQADLQALLQSGAQVR	y11/0.002	IAVSKPSGPQPQADLQALLQSGAQVR	3	10558_IAVSKPSGPQPQADLQALLQSGAQVR_3	1/Q8IV08	1	y	11	light
1/Q8IV08	887.156	617.337	82.1	102724_y6_1_IAVSKPSGPQPQADLQALLQSGAQVR_3	-1	8512.8	10558_IAVSKPSGPQPQADLQALLQSGAQVR_3	0	IAVSKPSGPQPQADLQALLQSGAQVR	y6/0.002,a13^2/-0.012	IAVSKPSGPQPQADLQALLQSGAQVR	3	10558_IAVSKPSGPQPQADLQALLQSGAQVR_3	1/Q8IV08	1	y	6	light
1/Q8IV08	887.156	858.479	82.1	102726_y8_1_IAVSKPSGPQPQADLQALLQSGAQVR_3	-1	9938.8	10558_IAVSKPSGPQPQADLQALLQSGAQVR_3	0	IAVSKPSGPQPQADLQALLQSGAQVR	y8/-0.002	IAVSKPSGPQPQADLQALLQSGAQVR	3	10558_IAVSKPSGPQPQADLQALLQSGAQVR_3	1/Q8IV08	1	y	8	light
1/Q8IV08	887.156	745.395	82.1	102725_y7_1_IAVSKPSGPQPQADLQALLQSGAQVR_3	-1	10000	10558_IAVSKPSGPQPQADLQALLQSGAQVR_3	0	IAVSKPSGPQPQADLQALLQSGAQVR	y7/0.001,b15^2/-0.008	IAVSKPSGPQPQADLQALLQSGAQVR	3	10558_IAVSKPSGPQPQADLQALLQSGAQVR_3	1/Q8IV08	1	y	7	light
1/Q8IV08	887.156	1042.6	82.1	102729_y10_1_IAVSKPSGPQPQADLQALLQSGAQVR_3	-1	7895.8	10558_IAVSKPSGPQPQADLQALLQSGAQVR_3	0	IAVSKPSGPQPQADLQALLQSGAQVR	y10/0.002	IAVSKPSGPQPQADLQALLQSGAQVR	3	10558_IAVSKPSGPQPQADLQALLQSGAQVR_3	1/Q8IV08	1	y	10	light
1/Q4J6C6	638.821	676.345	53.8	1617407_LDQPFIDC(UniMod:4)IR_2	-1	1548	105586_LDQPFIDC(UniMod:4)IR_2	0	LDQPFIDCIR	y5/0.005	LDQPFIDC(UniMod:4)IR	2	105586_LDQPFIDC(UniMod:4)IR_2	1/Q4J6C6	1	y	-1	light
1/Q4J6C6	638.821	563.261	53.8	1617406_LDQPFIDC(UniMod:4)IR_2	-1	1967	105586_LDQPFIDC(UniMod:4)IR_2	0	LDQPFIDCIR	y4/0.002	LDQPFIDC(UniMod:4)IR	2	105586_LDQPFIDC(UniMod:4)IR_2	1/Q4J6C6	1	y	-1	light
1/Q4J6C6	638.821	448.234	53.8	1617402_LDQPFIDC(UniMod:4)IR_2	-1	1241.8	105586_LDQPFIDC(UniMod:4)IR_2	0	LDQPFIDCIR	y3/-0.001	LDQPFIDC(UniMod:4)IR	2	105586_LDQPFIDC(UniMod:4)IR_2	1/Q4J6C6	1	y	-1	light
1/Q4J6C6	638.821	920.466	53.8	1617410_LDQPFIDC(UniMod:4)IR_2	-1	10000	105586_LDQPFIDC(UniMod:4)IR_2	0	LDQPFIDCIR	y7/-0.014	LDQPFIDC(UniMod:4)IR	2	105586_LDQPFIDC(UniMod:4)IR_2	1/Q4J6C6	1	y	-1	light
1/Q4J6C6	638.821	357.177	53.8	1617401_LDQPFIDC(UniMod:4)IR_2	-1	1878	105586_LDQPFIDC(UniMod:4)IR_2	0	LDQPFIDCIR	b3/0.003	LDQPFIDC(UniMod:4)IR	2	105586_LDQPFIDC(UniMod:4)IR_2	1/Q4J6C6	1	b	-1	light
1/Q4J6C6	638.821	823.413	53.8	1617409_LDQPFIDC(UniMod:4)IR_2	-1	1074.2	105586_LDQPFIDC(UniMod:4)IR_2	0	LDQPFIDCIR	y6/-0.010	LDQPFIDC(UniMod:4)IR	2	105586_LDQPFIDC(UniMod:4)IR_2	1/Q4J6C6	1	y	-1	light
1/Q8IV08	665.619	530.305	82.5	102736_y5_1_IAVSKPSGPQPQADLQALLQSGAQVR_4	-1	5961.5	10559_IAVSKPSGPQPQADLQALLQSGAQVR_4	0	IAVSKPSGPQPQADLQALLQSGAQVR	y5/0.010	IAVSKPSGPQPQADLQALLQSGAQVR	4	10559_IAVSKPSGPQPQADLQALLQSGAQVR_4	1/Q8IV08	1	y	5	light
1/Q8IV08	665.619	1042.6	82.5	102742_y10_1_IAVSKPSGPQPQADLQALLQSGAQVR_4	-1	1870.9	10559_IAVSKPSGPQPQADLQALLQSGAQVR_4	0	IAVSKPSGPQPQADLQALLQSGAQVR	y10/-0.007,b21-46^2/0.015	IAVSKPSGPQPQADLQALLQSGAQVR	4	10559_IAVSKPSGPQPQADLQALLQSGAQVR_4	1/Q8IV08	1	y	10	light
1/Q8IV08	665.619	965.541	82.5	102740_b10_1_IAVSKPSGPQPQADLQALLQSGAQVR_4	-1	3083.2	10559_IAVSKPSGPQPQADLQALLQSGAQVR_4	0	IAVSKPSGPQPQADLQALLQSGAQVR	b10/0.013	IAVSKPSGPQPQADLQALLQSGAQVR	4	10559_IAVSKPSGPQPQADLQALLQSGAQVR_4	1/Q8IV08	1	b	10	light
1/Q8IV08	665.619	858.479	82.5	102739_y8_1_IAVSKPSGPQPQADLQALLQSGAQVR_4	-1	4049.3	10559_IAVSKPSGPQPQADLQALLQSGAQVR_4	0	IAVSKPSGPQPQADLQALLQSGAQVR	y8/-0.001	IAVSKPSGPQPQADLQALLQSGAQVR	4	10559_IAVSKPSGPQPQADLQALLQSGAQVR_4	1/Q8IV08	1	y	8	light
1/Q8IV08	665.619	617.337	82.5	102737_y6_1_IAVSKPSGPQPQADLQALLQSGAQVR_4	-1	8616.9	10559_IAVSKPSGPQPQADLQALLQSGAQVR_4	0	IAVSKPSGPQPQADLQALLQSGAQVR	y6/0.003,a13^2/-0.012	IAVSKPSGPQPQADLQALLQSGAQVR	4	10559_IAVSKPSGPQPQADLQALLQSGAQVR_4	1/Q8IV08	1	y	6	light
1/Q8IV08	665.619	745.404	82.5	102738_b15_2_IAVSKPSGPQPQADLQALLQSGAQVR_4	-1	10000	10559_IAVSKPSGPQPQADLQALLQSGAQVR_4	0	IAVSKPSGPQPQADLQALLQSGAQVR	b15^2/-0.004,y7/0.005	IAVSKPSGPQPQADLQALLQSGAQVR	4	10559_IAVSKPSGPQPQADLQALLQSGAQVR_4	1/Q8IV08	2	b	15	light
1/P02788	1044.54	1182.63	112.9	101931_y10_1_IDSGLYLGSGYFTAIQNLR_2	-1	3200	10562_IDSGLYLGSGYFTAIQNLR_2	0	IDSGLYLGSGYFTAIQNLR	y10/-0.004	IDSGLYLGSGYFTAIQNLR	2	10562_IDSGLYLGSGYFTAIQNLR_2	1/P02788	1	y	10	light
1/P02788	1044.54	373.172	112.9	101921_b4_1_IDSGLYLGSGYFTAIQNLR_2	-1	2405.7	10562_IDSGLYLGSGYFTAIQNLR_2	0	IDSGLYLGSGYFTAIQNLR	b4/-0.001,m2:5/-0.001	IDSGLYLGSGYFTAIQNLR	2	10562_IDSGLYLGSGYFTAIQNLR_2	1/P02788	1	b	4	light
1/P02788	1044.54	1269.66	112.9	101932_y11_1_IDSGLYLGSGYFTAIQNLR_2	-1	2910.7	10562_IDSGLYLGSGYFTAIQNLR_2	0	IDSGLYLGSGYFTAIQNLR	y11/-0.009	IDSGLYLGSGYFTAIQNLR	2	10562_IDSGLYLGSGYFTAIQNLR_2	1/P02788	1	y	11	light
1/P02788	1044.54	962.542	112.9	101929_y8_1_IDSGLYLGSGYFTAIQNLR_2	-1	2141.2	10562_IDSGLYLGSGYFTAIQNLR_2	0	IDSGLYLGSGYFTAIQNLR	y8/-0.011	IDSGLYLGSGYFTAIQNLR	2	10562_IDSGLYLGSGYFTAIQNLR_2	1/P02788	1	y	8	light
1/P02788	1044.54	1439.76	112.9	101934_y13_1_IDSGLYLGSGYFTAIQNLR_2	-1	5431.9	10562_IDSGLYLGSGYFTAIQNLR_2	0	IDSGLYLGSGYFTAIQNLR	y13/-0.011	IDSGLYLGSGYFTAIQNLR	2	10562_IDSGLYLGSGYFTAIQNLR_2	1/P02788	1	y	13	light
1/P02788	1044.54	1326.68	112.9	101933_y12_1_IDSGLYLGSGYFTAIQNLR_2	-1	10000	10562_IDSGLYLGSGYFTAIQNLR_2	0	IDSGLYLGSGYFTAIQNLR	y12/-0.014	IDSGLYLGSGYFTAIQNLR	2	10562_IDSGLYLGSGYFTAIQNLR_2	1/P02788	1	y	12	light
1/P02788	696.697	643.389	112.6	101939_y5_1_IDSGLYLGSGYFTAIQNLR_3	-1	10000	10563_IDSGLYLGSGYFTAIQNLR_3	0	IDSGLYLGSGYFTAIQNLR	y5/0.004	IDSGLYLGSGYFTAIQNLR	3	10563_IDSGLYLGSGYFTAIQNLR_3	1/P02788	1	y	5	light
1/P02788	696.697	962.542	112.6	101944_y8_1_IDSGLYLGSGYFTAIQNLR_3	-1	4787.5	10563_IDSGLYLGSGYFTAIQNLR_3	0	IDSGLYLGSGYFTAIQNLR	y8/0.009	IDSGLYLGSGYFTAIQNLR	3	10563_IDSGLYLGSGYFTAIQNLR_3	1/P02788	1	y	8	light
1/P02788	696.697	402.246	112.6	101936_y3_1_IDSGLYLGSGYFTAIQNLR_3	-1	3777.3	10563_IDSGLYLGSGYFTAIQNLR_3	0	IDSGLYLGSGYFTAIQNLR	y3/0.001	IDSGLYLGSGYFTAIQNLR	3	10563_IDSGLYLGSGYFTAIQNLR_3	1/P02788	1	y	3	light
1/P02788	696.697	530.305	112.6	101938_y4_1_IDSGLYLGSGYFTAIQNLR_3	-1	8789.9	10563_IDSGLYLGSGYFTAIQNLR_3	0	IDSGLYLGSGYFTAIQNLR	y4/0.002	IDSGLYLGSGYFTAIQNLR	3	10563_IDSGLYLGSGYFTAIQNLR_3	1/P02788	1	y	4	light
1/P02788	696.697	714.426	112.6	101941_y6_1_IDSGLYLGSGYFTAIQNLR_3	-1	8713.6	10563_IDSGLYLGSGYFTAIQNLR_3	0	IDSGLYLGSGYFTAIQNLR	y6/0.005	IDSGLYLGSGYFTAIQNLR	3	10563_IDSGLYLGSGYFTAIQNLR_3	1/P02788	1	y	6	light
1/P02788	696.697	815.473	112.6	101943_y7_1_IDSGLYLGSGYFTAIQNLR_3	-1	9003.1	10563_IDSGLYLGSGYFTAIQNLR_3	0	IDSGLYLGSGYFTAIQNLR	y7/-0.002	IDSGLYLGSGYFTAIQNLR	3	10563_IDSGLYLGSGYFTAIQNLR_3	1/P02788	1	y	7	light
1/Q13085	488.248	589.309	39.6	101980_y4_1_IDTGWLDR_2	-1	1009.7	10567_IDTGWLDR_2	0	IDTGWLDR	y4/-0.003	IDTGWLDR	2	10567_IDTGWLDR_2	1/Q13085	1	y	4	light
1/Q13085	488.248	747.378	39.6	101983_y6_1_IDTGWLDR_2	-1	4144.1	10567_IDTGWLDR_2	0	IDTGWLDR	y6/-0.009	IDTGWLDR	2	10567_IDTGWLDR_2	1/Q13085	1	y	6	light
1/Q13085	488.248	646.331	39.6	101981_y5_1_IDTGWLDR_2	-1	1921.9	10567_IDTGWLDR_2	0	IDTGWLDR	y5/0.002	IDTGWLDR	2	10567_IDTGWLDR_2	1/Q13085	1	y	5	light
1/Q13085	488.248	862.405	39.6	101985_y7_1_IDTGWLDR_2	-1	2597.1	10567_IDTGWLDR_2	0	IDTGWLDR	y7/-0.003	IDTGWLDR	2	10567_IDTGWLDR_2	1/Q13085	1	y	7	light
1/Q13085	488.248	403.23	39.6	101978_y3_1_IDTGWLDR_2	-1	1095.6	10567_IDTGWLDR_2	0	IDTGWLDR	y3/-0.004	IDTGWLDR	2	10567_IDTGWLDR_2	1/Q13085	1	y	3	light
1/Q13085	488.248	374.193	39.6	101976_y6_2_IDTGWLDR_2	-1	362.8	10567_IDTGWLDR_2	0	IDTGWLDR	y6^2/0.003	IDTGWLDR	2	10567_IDTGWLDR_2	1/Q13085	2	y	6	light
1/P29144	648.82	779.43	50	1619100_LDSSDIYNELK_2	-1	2672.9	105697_LDSSDIYNELK_2	0	LDSSDIYNELK	y6/-0.004	LDSSDIYNELK	2	105697_LDSSDIYNELK_2	1/P29144	1	y	-1	light
1/P29144	648.82	1183.55	50	1619109_LDSSDIYNELK_2	-1	2237.6	105697_LDSSDIYNELK_2	0	LDSSDIYNELK	y10/-0.005	LDSSDIYNELK	2	105697_LDSSDIYNELK_2	1/P29144	1	y	-1	light
1/P29144	648.82	666.346	50	1619098_LDSSDIYNELK_2	-1	5059	105697_LDSSDIYNELK_2	0	LDSSDIYNELK	y5/-0.004	LDSSDIYNELK	2	105697_LDSSDIYNELK_2	1/P29144	1	y	-1	light
1/P29144	648.82	503.282	50	1619095_LDSSDIYNELK_2	-1	1973.8	105697_LDSSDIYNELK_2	0	LDSSDIYNELK	y4/-0.001	LDSSDIYNELK	2	105697_LDSSDIYNELK_2	1/P29144	1	y	-1	light
1/P29144	648.82	894.457	50	1619104_LDSSDIYNELK_2	-1	2595.3	105697_LDSSDIYNELK_2	0	LDSSDIYNELK	y7/0.001	LDSSDIYNELK	2	105697_LDSSDIYNELK_2	1/P29144	1	y	-1	light
1/P29144	648.82	1068.52	50	1619107_LDSSDIYNELK_2	-1	6344.6	105697_LDSSDIYNELK_2	0	LDSSDIYNELK	y9/-0.004	LDSSDIYNELK	2	105697_LDSSDIYNELK_2	1/P29144	1	y	-1	light
1/P29144	959.483	831.509	114.8	1619117_LDSSDIYNELKETYPNYLPLYVAR_3	-1	2816.2	105698_LDSSDIYNELKETYPNYLPLYVAR_3	0	LDSSDIYNELKETYPNYLPLYVAR	y7/0.002	LDSSDIYNELKETYPNYLPLYVAR	3	105698_LDSSDIYNELKETYPNYLPLYVAR_3	1/P29144	1	y	-1	light
1/P29144	959.483	718.425	114.8	1619115_LDSSDIYNELKETYPNYLPLYVAR_3	-1	10000	105698_LDSSDIYNELKETYPNYLPLYVAR_3	0	LDSSDIYNELKETYPNYLPLYVAR	y6/-0.006	LDSSDIYNELKETYPNYLPLYVAR	3	105698_LDSSDIYNELKETYPNYLPLYVAR_3	1/P29144	1	y	-1	light
1/P29144	959.483	518.209	114.8	1619111_LDSSDIYNELKETYPNYLPLYVAR_3	-1	2581.3	105698_LDSSDIYNELKETYPNYLPLYVAR_3	0	LDSSDIYNELKETYPNYLPLYVAR	b5/0.001,m2:6/0.001	LDSSDIYNELKETYPNYLPLYVAR	3	105698_LDSSDIYNELKETYPNYLPLYVAR_3	1/P29144	1	b	-1	light
1/P29144	959.483	603.337	114.8	1619112_LDSSDIYNELKETYPNYLPLYVAR_3	-1	2627.6	105698_LDSSDIYNELKETYPNYLPLYVAR_3	0	LDSSDIYNELKETYPNYLPLYVAR	y10^2/-0.004	LDSSDIYNELKETYPNYLPLYVAR	3	105698_LDSSDIYNELKETYPNYLPLYVAR_3	1/P29144	2	y	-1	light
1/P29144	959.483	994.572	114.8	1619118_LDSSDIYNELKETYPNYLPLYVAR_3	-1	2512.1	105698_LDSSDIYNELKETYPNYLPLYVAR_3	0	LDSSDIYNELKETYPNYLPLYVAR	y8/-0.004	LDSSDIYNELKETYPNYLPLYVAR	3	105698_LDSSDIYNELKETYPNYLPLYVAR_3	1/P29144	1	y	-1	light
1/P29144	959.483	1205.67	114.8	1619121_LDSSDIYNELKETYPNYLPLYVAR_3	-1	7422.6	105698_LDSSDIYNELKETYPNYLPLYVAR_3	0	LDSSDIYNELKETYPNYLPLYVAR	y10/0.007	LDSSDIYNELKETYPNYLPLYVAR	3	105698_LDSSDIYNELKETYPNYLPLYVAR_3	1/P29144	1	y	-1	light
1/P29144	719.864	518.209	114.4	1619125_LDSSDIYNELKETYPNYLPLYVAR_4	-1	1259.6	105699_LDSSDIYNELKETYPNYLPLYVAR_4	0	LDSSDIYNELKETYPNYLPLYVAR	b5/0.005,m2:6/0.005	LDSSDIYNELKETYPNYLPLYVAR	4	105699_LDSSDIYNELKETYPNYLPLYVAR_4	1/P29144	1	b	-1	light
1/P29144	719.864	621.372	114.4	1619126_LDSSDIYNELKETYPNYLPLYVAR_4	-1	992.4	105699_LDSSDIYNELKETYPNYLPLYVAR_4	0	LDSSDIYNELKETYPNYLPLYVAR	y5/0.013	LDSSDIYNELKETYPNYLPLYVAR	4	105699_LDSSDIYNELKETYPNYLPLYVAR_4	1/P29144	1	y	-1	light
1/P29144	719.864	359.716	114.4	1619122_LDSSDIYNELKETYPNYLPLYVAR_4	-1	1946.6	105699_LDSSDIYNELKETYPNYLPLYVAR_4	0	LDSSDIYNELKETYPNYLPLYVAR	y6^2/0.001	LDSSDIYNELKETYPNYLPLYVAR	4	105699_LDSSDIYNELKETYPNYLPLYVAR_4	1/P29144	2	y	-1	light
1/P29144	719.864	508.288	114.4	1619124_LDSSDIYNELKETYPNYLPLYVAR_4	-1	1942.3	105699_LDSSDIYNELKETYPNYLPLYVAR_4	0	LDSSDIYNELKETYPNYLPLYVAR	y4/0.002	LDSSDIYNELKETYPNYLPLYVAR	4	105699_LDSSDIYNELKETYPNYLPLYVAR_4	1/P29144	1	y	-1	light
1/P29144	719.864	994.572	114.4	1619133_LDSSDIYNELKETYPNYLPLYVAR_4	-1	839.7	105699_LDSSDIYNELKETYPNYLPLYVAR_4	0	LDSSDIYNELKETYPNYLPLYVAR	y8/0.019	LDSSDIYNELKETYPNYLPLYVAR	4	105699_LDSSDIYNELKETYPNYLPLYVAR_4	1/P29144	1	y	-1	light
1/P29144	719.864	831.509	114.4	1619132_LDSSDIYNELKETYPNYLPLYVAR_4	-1	689.1	105699_LDSSDIYNELKETYPNYLPLYVAR_4	0	LDSSDIYNELKETYPNYLPLYVAR	y7/-0.004	LDSSDIYNELKETYPNYLPLYVAR	4	105699_LDSSDIYNELKETYPNYLPLYVAR_4	1/P29144	1	y	-1	light
1/P54577	493.251	401.214	-1.6	102026_y3_1_IDVGEAEPR_2	-1	972	10572_IDVGEAEPR_2	0	IDVGEAEPR	y3/0.005	IDVGEAEPR	2	10572_IDVGEAEPR_2	1/P54577	1	y	3	light
1/P54577	493.251	658.315	-1.6	102030_y6_1_IDVGEAEPR_2	-1	10000	10572_IDVGEAEPR_2	0	IDVGEAEPR	y6/-0.001	IDVGEAEPR	2	10572_IDVGEAEPR_2	1/P54577	1	y	6	light
1/P54577	493.251	601.294	-1.6	102029_y5_1_IDVGEAEPR_2	-1	1817.3	10572_IDVGEAEPR_2	0	IDVGEAEPR	y5/0.000	IDVGEAEPR	2	10572_IDVGEAEPR_2	1/P54577	1	y	5	light
1/P54577	493.251	757.384	-1.6	102032_y7_1_IDVGEAEPR_2	-1	7451.8	10572_IDVGEAEPR_2	0	IDVGEAEPR	y7/-0.001	IDVGEAEPR	2	10572_IDVGEAEPR_2	1/P54577	1	y	7	light
1/P54577	493.251	872.411	-1.6	102033_y8_1_IDVGEAEPR_2	-1	4295	10572_IDVGEAEPR_2	0	IDVGEAEPR	y8/-0.001	IDVGEAEPR	2	10572_IDVGEAEPR_2	1/P54577	1	y	8	light
1/P54577	493.251	472.251	-1.6	102027_y4_1_IDVGEAEPR_2	-1	3323.8	10572_IDVGEAEPR_2	0	IDVGEAEPR	y4/0.005	IDVGEAEPR	2	10572_IDVGEAEPR_2	1/P54577	1	y	4	light
1/Q92597	1043.54	1229.63	127	1477593_y11_1_ISGWTQALPDMVVSHLFGK_2	-1	10000	105782_ISGWTQALPDMVVSHLFGK_2	0	ISGWTQALPDMVVSHLFGK	y11/-0.005	ISGWTQALPDMVVSHLFGK	2	105782_ISGWTQALPDMVVSHLFGK_2	1/Q92597	1	y	11	light
1/Q92597	1043.54	688.378	127	1477586_y6_1_ISGWTQALPDMVVSHLFGK_2	-1	3733.5	105782_ISGWTQALPDMVVSHLFGK_2	0	ISGWTQALPDMVVSHLFGK	y6/-0.002	ISGWTQALPDMVVSHLFGK	2	105782_ISGWTQALPDMVVSHLFGK_2	1/Q92597	1	y	6	light
1/Q92597	1043.54	744.368	127	1477588_b7_1_ISGWTQALPDMVVSHLFGK_2	-1	3438.3	105782_ISGWTQALPDMVVSHLFGK_2	0	ISGWTQALPDMVVSHLFGK	b7/-0.002,m2:8/-0.002	ISGWTQALPDMVVSHLFGK	2	105782_ISGWTQALPDMVVSHLFGK_2	1/Q92597	1	b	7	light
1/Q92597	1043.54	601.346	127	1477585_y5_1_ISGWTQALPDMVVSHLFGK_2	-1	2841.6	105782_ISGWTQALPDMVVSHLFGK_2	0	ISGWTQALPDMVVSHLFGK	y5/-0.002	ISGWTQALPDMVVSHLFGK	2	105782_ISGWTQALPDMVVSHLFGK_2	1/Q92597	1	y	5	light
1/Q92597	1043.54	351.203	127	1477582_y3_1_ISGWTQALPDMVVSHLFGK_2	-1	3864	105782_ISGWTQALPDMVVSHLFGK_2	0	ISGWTQALPDMVVSHLFGK	y3/0.001	ISGWTQALPDMVVSHLFGK	2	105782_ISGWTQALPDMVVSHLFGK_2	1/Q92597	1	y	3	light
1/Q92597	1043.54	1342.72	127	1477595_y12_1_ISGWTQALPDMVVSHLFGK_2	-1	3741.2	105782_ISGWTQALPDMVVSHLFGK_2	0	ISGWTQALPDMVVSHLFGK	y12/-0.008	ISGWTQALPDMVVSHLFGK	2	105782_ISGWTQALPDMVVSHLFGK_2	1/Q92597	1	y	12	light
1/Q92597	1051.54	688.378	112.3	1477603_y6_1_ISGWTQALPDM(UniMod:35)VVSHLFGK_2	-1	8536.6	105783_ISGWTQALPDM(UniMod:35)VVSHLFGK_2	0	ISGWTQALPDMVVSHLFGK	y6/-0.008	ISGWTQALPDM(UniMod:35)VVSHLFGK	2	105783_ISGWTQALPDM(UniMod:35)VVSHLFGK_2	1/Q92597	1	y	6	light
1/Q92597	1051.54	351.203	112.3	1477599_y3_1_ISGWTQALPDM(UniMod:35)VVSHLFGK_2	-1	5000	105783_ISGWTQALPDM(UniMod:35)VVSHLFGK_2	0	ISGWTQALPDMVVSHLFGK	y3/0.006	ISGWTQALPDM(UniMod:35)VVSHLFGK	2	105783_ISGWTQALPDM(UniMod:35)VVSHLFGK_2	1/Q92597	1	y	3	light
1/Q92597	1051.54	1245.63	112.3	1477606_y11_1_ISGWTQALPDM(UniMod:35)VVSHLFGK_2	-1	10000	105783_ISGWTQALPDM(UniMod:35)VVSHLFGK_2	0	ISGWTQALPDMVVSHLFGK	y11/-0.001	ISGWTQALPDM(UniMod:35)VVSHLFGK	2	105783_ISGWTQALPDM(UniMod:35)VVSHLFGK_2	1/Q92597	1	y	11	light
1/Q92597	1051.54	857.452	112.3	1477604_b8_1_ISGWTQALPDM(UniMod:35)VVSHLFGK_2	-1	5152.7	105783_ISGWTQALPDM(UniMod:35)VVSHLFGK_2	0	ISGWTQALPDMVVSHLFGK	b8/0.012	ISGWTQALPDM(UniMod:35)VVSHLFGK	2	105783_ISGWTQALPDM(UniMod:35)VVSHLFGK_2	1/Q92597	1	b	8	light
1/Q92597	1051.54	978.488	112.3	1477605_b18_2_ISGWTQALPDM(UniMod:35)VVSHLFGK_2	-1	4513.2	105783_ISGWTQALPDM(UniMod:35)VVSHLFGK_2	0	ISGWTQALPDMVVSHLFGK	b18^2/0.010	ISGWTQALPDM(UniMod:35)VVSHLFGK	2	105783_ISGWTQALPDM(UniMod:35)VVSHLFGK_2	1/Q92597	2	b	18	light
1/Q92597	1051.54	464.287	112.3	1477600_y4_1_ISGWTQALPDM(UniMod:35)VVSHLFGK_2	-1	4268.3	105783_ISGWTQALPDM(UniMod:35)VVSHLFGK_2	0	ISGWTQALPDMVVSHLFGK	y4/0.012	ISGWTQALPDM(UniMod:35)VVSHLFGK	2	105783_ISGWTQALPDM(UniMod:35)VVSHLFGK_2	1/Q92597	1	y	4	light
1/Q92597	696.031	1229.63	127.3	1477628_y11_1_ISGWTQALPDMVVSHLFGK_3	-1	8186.5	105784_ISGWTQALPDMVVSHLFGK_3	0	ISGWTQALPDMVVSHLFGK	y11/-0.004	ISGWTQALPDMVVSHLFGK	3	105784_ISGWTQALPDMVVSHLFGK_3	1/Q92597	1	y	11	light
1/Q92597	696.031	615.321	127.3	1477613_y11_2_ISGWTQALPDMVVSHLFGK_3	-1	3606.9	105784_ISGWTQALPDMVVSHLFGK_3	0	ISGWTQALPDMVVSHLFGK	y11^2/-0.001	ISGWTQALPDMVVSHLFGK	3	105784_ISGWTQALPDMVVSHLFGK_3	1/Q92597	2	y	11	light
1/Q92597	696.031	787.446	127.3	1477619_y7_1_ISGWTQALPDMVVSHLFGK_3	-1	3421.9	105784_ISGWTQALPDMVVSHLFGK_3	0	ISGWTQALPDMVVSHLFGK	y7/-0.003	ISGWTQALPDMVVSHLFGK	3	105784_ISGWTQALPDMVVSHLFGK_3	1/Q92597	1	y	7	light
1/Q92597	696.031	688.378	127.3	1477615_y6_1_ISGWTQALPDMVVSHLFGK_3	-1	3370.5	105784_ISGWTQALPDMVVSHLFGK_3	0	ISGWTQALPDMVVSHLFGK	y6/-0.002	ISGWTQALPDMVVSHLFGK	3	105784_ISGWTQALPDMVVSHLFGK_3	1/Q92597	1	y	6	light
1/Q92597	696.031	821.935	127.3	1477621_y15_2_ISGWTQALPDMVVSHLFGK_3	-1	3418.7	105784_ISGWTQALPDMVVSHLFGK_3	0	ISGWTQALPDMVVSHLFGK	y15^2/0.001	ISGWTQALPDMVVSHLFGK	3	105784_ISGWTQALPDMVVSHLFGK_3	1/Q92597	2	y	15	light
1/Q92597	696.031	351.203	127.3	1477608_y3_1_ISGWTQALPDMVVSHLFGK_3	-1	2432.6	105784_ISGWTQALPDMVVSHLFGK_3	0	ISGWTQALPDMVVSHLFGK	y3/-0.000	ISGWTQALPDMVVSHLFGK	3	105784_ISGWTQALPDMVVSHLFGK_3	1/Q92597	1	y	3	light
1/Q92597	701.363	951.483	119.8	1477643_y17_2_ISGWTQALPDM(UniMod:35)VVSHLFGK_3	-1	2328.2	105785_ISGWTQALPDM(UniMod:35)VVSHLFGK_3	0	ISGWTQALPDMVVSHLFGK	y17^2/0.009	ISGWTQALPDM(UniMod:35)VVSHLFGK	3	105785_ISGWTQALPDM(UniMod:35)VVSHLFGK_3	1/Q92597	2	y	17	light
1/Q92597	701.363	829.932	119.8	1477641_y15_2_ISGWTQALPDM(UniMod:35)VVSHLFGK_3	-1	2505.7	105785_ISGWTQALPDM(UniMod:35)VVSHLFGK_3	0	ISGWTQALPDMVVSHLFGK	y15^2/0.005	ISGWTQALPDM(UniMod:35)VVSHLFGK	3	105785_ISGWTQALPDM(UniMod:35)VVSHLFGK_3	1/Q92597	2	y	15	light
1/Q92597	701.363	1245.63	119.8	1477645_y11_1_ISGWTQALPDM(UniMod:35)VVSHLFGK_3	-1	2598.8	105785_ISGWTQALPDM(UniMod:35)VVSHLFGK_3	0	ISGWTQALPDMVVSHLFGK	y11/-0.011	ISGWTQALPDM(UniMod:35)VVSHLFGK	3	105785_ISGWTQALPDM(UniMod:35)VVSHLFGK_3	1/Q92597	1	y	11	light
1/Q92597	701.363	623.318	119.8	1477635_y11_2_ISGWTQALPDM(UniMod:35)VVSHLFGK_3	-1	2960.7	105785_ISGWTQALPDM(UniMod:35)VVSHLFGK_3	0	ISGWTQALPDMVVSHLFGK	y11^2/0.000	ISGWTQALPDM(UniMod:35)VVSHLFGK	3	105785_ISGWTQALPDM(UniMod:35)VVSHLFGK_3	1/Q92597	2	y	11	light
1/Q92597	701.363	787.446	119.8	1477639_y7_1_ISGWTQALPDM(UniMod:35)VVSHLFGK_3	-1	3054.1	105785_ISGWTQALPDM(UniMod:35)VVSHLFGK_3	0	ISGWTQALPDMVVSHLFGK	y7/-0.006	ISGWTQALPDM(UniMod:35)VVSHLFGK	3	105785_ISGWTQALPDM(UniMod:35)VVSHLFGK_3	1/Q92597	1	y	7	light
1/Q92597	701.363	688.378	119.8	1477637_y6_1_ISGWTQALPDM(UniMod:35)VVSHLFGK_3	-1	3162.9	105785_ISGWTQALPDM(UniMod:35)VVSHLFGK_3	0	ISGWTQALPDMVVSHLFGK	y6/-0.004	ISGWTQALPDM(UniMod:35)VVSHLFGK	3	105785_ISGWTQALPDM(UniMod:35)VVSHLFGK_3	1/Q92597	1	y	6	light
1/Q92597	947.72	439.23	113.6	1477646_y3_1_ISGWTQALPDMVVSHLFGKEEMQSNVEVVHTYR_4	-1	2585.7	105786_ISGWTQALPDMVVSHLFGKEEMQSNVEVVHTYR_4	0	ISGWTQALPDMVVSHLFGKEEMQSNVEVVHTYR	y3/0.003	ISGWTQALPDMVVSHLFGKEEMQSNVEVVHTYR	4	105786_ISGWTQALPDMVVSHLFGKEEMQSNVEVVHTYR_4	1/Q92597	1	y	3	light
1/Q92597	947.72	1203.61	113.6	1477660_y10_1_ISGWTQALPDMVVSHLFGKEEMQSNVEVVHTYR_4	-1	2953	105786_ISGWTQALPDMVVSHLFGKEEMQSNVEVVHTYR_4	0	ISGWTQALPDMVVSHLFGKEEMQSNVEVVHTYR	y10/0.014	ISGWTQALPDMVVSHLFGKEEMQSNVEVVHTYR	4	105786_ISGWTQALPDMVVSHLFGKEEMQSNVEVVHTYR_4	1/Q92597	1	y	10	light
1/Q92597	947.72	1116.58	113.6	1477659_y9_1_ISGWTQALPDMVVSHLFGKEEMQSNVEVVHTYR_4	-1	3034	105786_ISGWTQALPDMVVSHLFGKEEMQSNVEVVHTYR_4	0	ISGWTQALPDMVVSHLFGKEEMQSNVEVVHTYR	y9/-0.010	ISGWTQALPDMVVSHLFGKEEMQSNVEVVHTYR	4	105786_ISGWTQALPDMVVSHLFGKEEMQSNVEVVHTYR_4	1/Q92597	1	y	9	light
1/Q92597	947.72	576.289	113.6	1477649_y4_1_ISGWTQALPDMVVSHLFGKEEMQSNVEVVHTYR_4	-1	3428.8	105786_ISGWTQALPDMVVSHLFGKEEMQSNVEVVHTYR_4	0	ISGWTQALPDMVVSHLFGKEEMQSNVEVVHTYR	y4/-0.003	ISGWTQALPDMVVSHLFGKEEMQSNVEVVHTYR	4	105786_ISGWTQALPDMVVSHLFGKEEMQSNVEVVHTYR_4	1/Q92597	1	y	4	light
1/Q92597	947.72	675.357	113.6	1477652_y5_1_ISGWTQALPDMVVSHLFGKEEMQSNVEVVHTYR_4	-1	3041.4	105786_ISGWTQALPDMVVSHLFGKEEMQSNVEVVHTYR_4	0	ISGWTQALPDMVVSHLFGKEEMQSNVEVVHTYR	y5/0.006,b19-44^3/-0.001	ISGWTQALPDMVVSHLFGKEEMQSNVEVVHTYR	4	105786_ISGWTQALPDMVVSHLFGKEEMQSNVEVVHTYR_4	1/Q92597	1	y	5	light
1/Q92597	947.72	903.468	113.6	1477656_y7_1_ISGWTQALPDMVVSHLFGKEEMQSNVEVVHTYR_4	-1	3852.6	105786_ISGWTQALPDMVVSHLFGKEEMQSNVEVVHTYR_4	0	ISGWTQALPDMVVSHLFGKEEMQSNVEVVHTYR	[y7/-0.018]	ISGWTQALPDMVVSHLFGKEEMQSNVEVVHTYR	4	105786_ISGWTQALPDMVVSHLFGKEEMQSNVEVVHTYR_4	1/Q92597	1	y	7	light
1/Q92597	758.377	903.468	114.3	1477674_y7_1_ISGWTQALPDMVVSHLFGKEEMQSNVEVVHTYR_5	-1	4797.3	105787_ISGWTQALPDMVVSHLFGKEEMQSNVEVVHTYR_5	0	ISGWTQALPDMVVSHLFGKEEMQSNVEVVHTYR	y7/0.003	ISGWTQALPDMVVSHLFGKEEMQSNVEVVHTYR	5	105787_ISGWTQALPDMVVSHLFGKEEMQSNVEVVHTYR_5	1/Q92597	1	y	7	light
1/Q92597	758.377	576.289	114.3	1477667_y4_1_ISGWTQALPDMVVSHLFGKEEMQSNVEVVHTYR_5	-1	4306.7	105787_ISGWTQALPDMVVSHLFGKEEMQSNVEVVHTYR_5	0	ISGWTQALPDMVVSHLFGKEEMQSNVEVVHTYR	y4/-0.000,m9:29^4/0.008	ISGWTQALPDMVVSHLFGKEEMQSNVEVVHTYR	5	105787_ISGWTQALPDMVVSHLFGKEEMQSNVEVVHTYR_5	1/Q92597	1	y	4	light
1/Q92597	758.377	675.357	114.3	1477669_y5_1_ISGWTQALPDMVVSHLFGKEEMQSNVEVVHTYR_5	-1	3763.4	105787_ISGWTQALPDMVVSHLFGKEEMQSNVEVVHTYR_5	0	ISGWTQALPDMVVSHLFGKEEMQSNVEVVHTYR	y5/-0.004,b19-44^3/-0.011	ISGWTQALPDMVVSHLFGKEEMQSNVEVVHTYR	5	105787_ISGWTQALPDMVVSHLFGKEEMQSNVEVVHTYR_5	1/Q92597	1	y	5	light
1/Q92597	758.377	774.426	114.3	1477672_y6_1_ISGWTQALPDMVVSHLFGKEEMQSNVEVVHTYR_5	-1	3321.2	105787_ISGWTQALPDMVVSHLFGKEEMQSNVEVVHTYR_5	0	ISGWTQALPDMVVSHLFGKEEMQSNVEVVHTYR	y6/-0.001	ISGWTQALPDMVVSHLFGKEEMQSNVEVVHTYR	5	105787_ISGWTQALPDMVVSHLFGKEEMQSNVEVVHTYR_5	1/Q92597	1	y	6	light
1/Q92597	758.377	439.23	114.3	1477665_y3_1_ISGWTQALPDMVVSHLFGKEEMQSNVEVVHTYR_5	-1	3490.8	105787_ISGWTQALPDMVVSHLFGKEEMQSNVEVVHTYR_5	0	ISGWTQALPDMVVSHLFGKEEMQSNVEVVHTYR	y3/-0.001	ISGWTQALPDMVVSHLFGKEEMQSNVEVVHTYR	5	105787_ISGWTQALPDMVVSHLFGKEEMQSNVEVVHTYR_5	1/Q92597	1	y	3	light
1/Q92597	758.377	1203.61	114.3	1477678_y10_1_ISGWTQALPDMVVSHLFGKEEMQSNVEVVHTYR_5	-1	2766.3	105787_ISGWTQALPDMVVSHLFGKEEMQSNVEVVHTYR_5	0	ISGWTQALPDMVVSHLFGKEEMQSNVEVVHTYR	y10/-0.007	ISGWTQALPDMVVSHLFGKEEMQSNVEVVHTYR	5	105787_ISGWTQALPDMVVSHLFGKEEMQSNVEVVHTYR_5	1/Q92597	1	y	10	light
1/P29144	680.85	746.383	53.1	102935_y6_1_IC(UniMod:4)EVINEAVWK_2	-1	5726.5	10581_IC(UniMod:4)EVINEAVWK_2	0	ICEVINEAVWK	y6/0.015	IC(UniMod:4)EVINEAVWK	2	10581_IC(UniMod:4)EVINEAVWK_2	1/P29144	1	y	6	light
1/P29144	680.85	502.233	53.1	102933_b4_1_IC(UniMod:4)EVINEAVWK_2	-1	3687.3	10581_IC(UniMod:4)EVINEAVWK_2	0	ICEVINEAVWK	b4/0.002,m2:5/0.002	IC(UniMod:4)EVINEAVWK	2	10581_IC(UniMod:4)EVINEAVWK_2	1/P29144	1	b	4	light
1/P29144	680.85	403.165	53.1	102931_b3_1_IC(UniMod:4)EVINEAVWK_2	-1	6339.5	10581_IC(UniMod:4)EVINEAVWK_2	0	ICEVINEAVWK	b3/0.004	IC(UniMod:4)EVINEAVWK	2	10581_IC(UniMod:4)EVINEAVWK_2	1/P29144	1	b	3	light
1/P29144	680.85	958.536	53.1	102937_y8_1_IC(UniMod:4)EVINEAVWK_2	-1	6341.6	10581_IC(UniMod:4)EVINEAVWK_2	0	ICEVINEAVWK	y8/0.002	IC(UniMod:4)EVINEAVWK	2	10581_IC(UniMod:4)EVINEAVWK_2	1/P29144	1	y	8	light
1/P29144	680.85	1087.58	53.1	102938_y9_1_IC(UniMod:4)EVINEAVWK_2	-1	10000	10581_IC(UniMod:4)EVINEAVWK_2	0	ICEVINEAVWK	y9/0.005	IC(UniMod:4)EVINEAVWK	2	10581_IC(UniMod:4)EVINEAVWK_2	1/P29144	1	y	9	light
1/P29144	680.85	859.467	53.1	102936_y7_1_IC(UniMod:4)EVINEAVWK_2	-1	7899.8	10581_IC(UniMod:4)EVINEAVWK_2	0	ICEVINEAVWK	y7/0.012	IC(UniMod:4)EVINEAVWK	2	10581_IC(UniMod:4)EVINEAVWK_2	1/P29144	1	y	7	light
1/Q8NCC3	698.332	641.79	40.7	102948_y12_2_IC(UniMod:4)FGDGDGTVNLK_2	-1	1354.4	10582_IC(UniMod:4)FGDGDGTVNLK_2	0	ICFGDGDGTVNLK	y12^2/-0.010	IC(UniMod:4)FGDGDGTVNLK	2	10582_IC(UniMod:4)FGDGDGTVNLK_2	1/Q8NCC3	2	y	12	light
1/Q8NCC3	698.332	803.426	40.7	102951_y8_1_IC(UniMod:4)FGDGDGTVNLK_2	-1	1541.9	10582_IC(UniMod:4)FGDGDGTVNLK_2	0	ICFGDGDGTVNLK	y8/0.000	IC(UniMod:4)FGDGDGTVNLK	2	10582_IC(UniMod:4)FGDGDGTVNLK_2	1/Q8NCC3	1	y	8	light
1/Q8NCC3	698.332	631.377	40.7	102947_y6_1_IC(UniMod:4)FGDGDGTVNLK_2	-1	2183.5	10582_IC(UniMod:4)FGDGDGTVNLK_2	0	ICFGDGDGTVNLK	y6/0.003	IC(UniMod:4)FGDGDGTVNLK	2	10582_IC(UniMod:4)FGDGDGTVNLK_2	1/Q8NCC3	1	y	6	light
1/Q8NCC3	698.332	374.24	40.7	102940_y3_1_IC(UniMod:4)FGDGDGTVNLK_2	-1	1803.4	10582_IC(UniMod:4)FGDGDGTVNLK_2	0	ICFGDGDGTVNLK	y3/-0.003	IC(UniMod:4)FGDGDGTVNLK	2	10582_IC(UniMod:4)FGDGDGTVNLK_2	1/Q8NCC3	1	y	3	light
1/Q8NCC3	698.332	1122.54	40.7	102957_y11_1_IC(UniMod:4)FGDGDGTVNLK_2	-1	5431.8	10582_IC(UniMod:4)FGDGDGTVNLK_2	0	ICFGDGDGTVNLK	y11/-0.006	IC(UniMod:4)FGDGDGTVNLK	2	10582_IC(UniMod:4)FGDGDGTVNLK_2	1/Q8NCC3	1	y	11	light
1/Q8NCC3	698.332	975.474	40.7	102955_y10_1_IC(UniMod:4)FGDGDGTVNLK_2	-1	3279.4	10582_IC(UniMod:4)FGDGDGTVNLK_2	0	ICFGDGDGTVNLK	y10/-0.001	IC(UniMod:4)FGDGDGTVNLK	2	10582_IC(UniMod:4)FGDGDGTVNLK_2	1/Q8NCC3	1	y	10	light
1/P23946	926.994	657.347	67.5	1478329_b5_1_ISHYRPWINQILQAN_2	-1	4436.8	105830_ISHYRPWINQILQAN_2	0	ISHYRPWINQILQAN	b5/-0.003	ISHYRPWINQILQAN	2	105830_ISHYRPWINQILQAN_2	1/P23946	1	b	5	light
1/P23946	926.994	704.878	67.5	1478331_b11_2_ISHYRPWINQILQAN_2	-1	4241.5	105830_ISHYRPWINQILQAN_2	0	ISHYRPWINQILQAN	b11^2/0.007,m2:12^2/0.007	ISHYRPWINQILQAN	2	105830_ISHYRPWINQILQAN_2	1/P23946	2	b	11	light
1/P23946	926.994	1408.75	67.5	1478339_b11_1_ISHYRPWINQILQAN_2	-1	4871.9	105830_ISHYRPWINQILQAN_2	0	ISHYRPWINQILQAN	b11/-0.016,m2:12/-0.016	ISHYRPWINQILQAN	2	105830_ISHYRPWINQILQAN_2	1/P23946	1	b	11	light
1/P23946	926.994	648.336	67.5	1478327_b10_2_ISHYRPWINQILQAN_2	-1	10000	105830_ISHYRPWINQILQAN_2	0	ISHYRPWINQILQAN	b10^2/-0.001,m2:11^2/-0.001	ISHYRPWINQILQAN	2	105830_ISHYRPWINQILQAN_2	1/P23946	2	b	10	light
1/P23946	926.994	825.449	67.5	1478334_b13_2_ISHYRPWINQILQAN_2	-1	4773.4	105830_ISHYRPWINQILQAN_2	0	ISHYRPWINQILQAN	b13^2/-0.011	ISHYRPWINQILQAN	2	105830_ISHYRPWINQILQAN_2	1/P23946	2	b	13	light
1/P23946	926.994	1521.83	67.5	1478341_b12_1_ISHYRPWINQILQAN_2	-1	4410.3	105830_ISHYRPWINQILQAN_2	0	ISHYRPWINQILQAN	b12/-0.005	ISHYRPWINQILQAN	2	105830_ISHYRPWINQILQAN_2	1/P23946	1	b	12	light
1/P23946	618.332	1053.56	69.1	1478354_b8_1_ISHYRPWINQILQAN_3	-1	4869.5	105831_ISHYRPWINQILQAN_3	0	ISHYRPWINQILQAN	b8/0.020,y9-46/-0.001	ISHYRPWINQILQAN	3	105831_ISHYRPWINQILQAN_3	1/P23946	1	b	8	light
1/P23946	618.332	648.336	69.1	1478347_b10_2_ISHYRPWINQILQAN_3	-1	8350.1	105831_ISHYRPWINQILQAN_3	0	ISHYRPWINQILQAN	b10^2/0.003,m2:11^2/0.003	ISHYRPWINQILQAN	3	105831_ISHYRPWINQILQAN_3	1/P23946	2	b	10	light
1/P23946	618.332	704.878	69.1	1478349_b11_2_ISHYRPWINQILQAN_3	-1	4962.2	105831_ISHYRPWINQILQAN_3	0	ISHYRPWINQILQAN	b11^2/0.011,m2:12^2/0.011	ISHYRPWINQILQAN	3	105831_ISHYRPWINQILQAN_3	1/P23946	2	b	11	light
1/P23946	618.332	1167.61	69.1	1478355_b9_1_ISHYRPWINQILQAN_3	-1	2755.1	105831_ISHYRPWINQILQAN_3	0	ISHYRPWINQILQAN	b9/0.020	ISHYRPWINQILQAN	3	105831_ISHYRPWINQILQAN_3	1/P23946	1	b	9	light
1/P23946	618.332	825.449	69.1	1478351_b13_2_ISHYRPWINQILQAN_3	-1	4461.9	105831_ISHYRPWINQILQAN_3	0	ISHYRPWINQILQAN	b13^2/0.012	ISHYRPWINQILQAN	3	105831_ISHYRPWINQILQAN_3	1/P23946	2	b	13	light
1/P23946	618.332	860.968	69.1	1478352_b14_2_ISHYRPWINQILQAN_3	-1	3970.5	105831_ISHYRPWINQILQAN_3	0	ISHYRPWINQILQAN	b14^2/0.017	ISHYRPWINQILQAN	3	105831_ISHYRPWINQILQAN_3	1/P23946	2	b	14	light
1/P02787	863.387	403.165	18.4	102153_b3_1_IEC(UniMod:4)VSAETTEDC(UniMod:4)IAK_2	-1	6058.9	10585_IEC(UniMod:4)VSAETTEDC(UniMod:4)IAK_2	0	IECVSAETTEDCIAK	b3/0.003,m6:9/-0.015	IEC(UniMod:4)VSAETTEDC(UniMod:4)IAK	2	10585_IEC(UniMod:4)VSAETTEDC(UniMod:4)IAK_2	1/P02787	1	b	3	light
1/P02787	863.387	1224.54	18.4	102165_y11_1_IEC(UniMod:4)VSAETTEDC(UniMod:4)IAK_2	-1	10000	10585_IEC(UniMod:4)VSAETTEDC(UniMod:4)IAK_2	0	IECVSAETTEDCIAK	y11/-0.000	IEC(UniMod:4)VSAETTEDC(UniMod:4)IAK	2	10585_IEC(UniMod:4)VSAETTEDC(UniMod:4)IAK_2	1/P02787	1	y	11	light
1/P02787	863.387	937.43	18.4	102162_y8_1_IEC(UniMod:4)VSAETTEDC(UniMod:4)IAK_2	-1	4192.4	10585_IEC(UniMod:4)VSAETTEDC(UniMod:4)IAK_2	0	IECVSAETTEDCIAK	y8/-0.001	IEC(UniMod:4)VSAETTEDC(UniMod:4)IAK	2	10585_IEC(UniMod:4)VSAETTEDC(UniMod:4)IAK_2	1/P02787	1	y	8	light
1/P02787	863.387	1323.61	18.4	102166_y12_1_IEC(UniMod:4)VSAETTEDC(UniMod:4)IAK_2	-1	2604	10585_IEC(UniMod:4)VSAETTEDC(UniMod:4)IAK_2	0	IECVSAETTEDCIAK	y12/-0.000	IEC(UniMod:4)VSAETTEDC(UniMod:4)IAK	2	10585_IEC(UniMod:4)VSAETTEDC(UniMod:4)IAK_2	1/P02787	1	y	12	light
1/P02787	863.387	1137.51	18.4	102164_y10_1_IEC(UniMod:4)VSAETTEDC(UniMod:4)IAK_2	-1	3737.4	10585_IEC(UniMod:4)VSAETTEDC(UniMod:4)IAK_2	0	IECVSAETTEDCIAK	y10/-0.005	IEC(UniMod:4)VSAETTEDC(UniMod:4)IAK	2	10585_IEC(UniMod:4)VSAETTEDC(UniMod:4)IAK_2	1/P02787	1	y	10	light
1/P02787	863.387	1066.47	18.4	102163_y9_1_IEC(UniMod:4)VSAETTEDC(UniMod:4)IAK_2	-1	4079.5	10585_IEC(UniMod:4)VSAETTEDC(UniMod:4)IAK_2	0	IECVSAETTEDCIAK	y9/-0.005	IEC(UniMod:4)VSAETTEDC(UniMod:4)IAK	2	10585_IEC(UniMod:4)VSAETTEDC(UniMod:4)IAK_2	1/P02787	1	y	9	light
1/Q12884	524.787	428.25	14.8	1478706_y4_1_ISIGSYPPSK_2	-1	10000	105856_ISIGSYPPSK_2	0	ISIGSYPPSK	y4/0.004	ISIGSYPPSK	2	105856_ISIGSYPPSK_2	1/Q12884	1	y	4	light
[truncated: 74,153 more rows]
