# Supplementary material for: Depletion-dependent activity-based protein profiling using SWATH/DIA-MS detects serine hydrolase lipid remodeling in lung adenocarcinoma progression
Source: Nat Commun. 2025 May 27;16:4889. doi: 10.1038/s41467-025-59564-x (PMC12117057; doi:10.1038/s41467-025-59564-x)
Supplement: Supplementary file 5 — Supplementary Data 2 [file 41467_2025_59564_MOESM5_ESM.xlsx]

## Sheet: Supplementary Data 2
96 (ISP) PEPTIDES	PROTEIN	Protein Names	Gene Names	Organism
NAVTQEFGPVPDTAR	1/Q99798	Aconitate hydratase, mitochondrial	ACO2	Homo sapiens (Human)
SQFTITPGSEQIR	1/Q99798	Aconitate hydratase, mitochondrial	ACO3	Homo sapiens (Human)
IWYHTFYNELR	1/Q562R1	Beta-actin-like protein 2	ACTBL2	Homo sapiens (Human)
VAPDEHPILLTEAPLNPK	1/Q562R1	Beta-actin-like protein 2	ACTBL3	Homo sapiens (Human)
KLEVEANNAFDQYR	1/P47756	F-actin-capping protein subunit beta	CAPZB	Homo sapiens (Human)
LVEDMENK	1/P47756	F-actin-capping protein subunit beta	CAPZB	Homo sapiens (Human)
STLNEIYFGK	1/P47756	F-actin-capping protein subunit beta	CAPZB	Homo sapiens (Human)
AIKELEEWYAR	1/P09496	Clathrin light chain A	CLTA	Homo sapiens (Human)
ELEEWYAR	1/P09496	Clathrin light chain A	CLTA	Homo sapiens (Human)
LEALDANSR	1/P09496	Clathrin light chain A	CLTA	Homo sapiens (Human)
LQSEPESIR	1/P09496	Clathrin light chain A	CLTA	Homo sapiens (Human)
LQSEPESIRK	1/P09496	Clathrin light chain A	CLTA	Homo sapiens (Human)
DAGPLLISLK	1/P31146	Coronin-1A	CORO1A, CORO1	Homo sapiens (Human)
ILTTGFSR	1/P31146	Coronin-1A	CORO1A, CORO2	Homo sapiens (Human)
QVALWDTK	1/P31146	Coronin-1A	CORO1A, CORO3	Homo sapiens (Human)
GALQNIIPASTGAAK	1/P04406	Glyceraldehyde-3-phosphate dehydrogenase	GAPDH, GAPD, CDABP0047, OK/SW-cl.12	Homo sapiens (Human)
LISWYDNEFGYSNR	1/P04406	Glyceraldehyde-3-phosphate dehydrogenase	GAPDH, GAPD, CDABP0047, OK/SW-cl.13	Homo sapiens (Human)
EKPYFPIPEEYTFIQNVPLEDR	1/Q00839	Heterogeneous nuclear ribonucleoprotein U	HNRNPU, C1orf199, HNRPU, SAFA, U21.1	Homo sapiens (Human)
LQAALDDEEAGGRPAMEPGNGSLDLGGDSAGR	1/Q00839	Heterogeneous nuclear ribonucleoprotein U	HNRNPU, C1orf199, HNRPU, SAFA, U21.2	Homo sapiens (Human)
NGQDLGVAFK	1/Q00839	Heterogeneous nuclear ribonucleoprotein U	HNRNPU, C1orf199, HNRPU, SAFA, U21.3	Homo sapiens (Human)
AQLGGPEAAK	1/P04792	Heat shock protein beta-1	HSPB1, HSP27, HSP28	Homo sapiens (Human)
LATQSNEITIPVTFESR	1/P04792	Heat shock protein beta-1	HSPB1, HSP27, HSP29	Homo sapiens (Human)
LFDQAFGLPR	1/P04792	Heat shock protein beta-1	HSPB1, HSP27, HSP30	Homo sapiens (Human)
QLSSGVSEIR	1/P04792	Heat shock protein beta-1	HSPB1, HSP27, HSP31	Homo sapiens (Human)
VSLDVNHFAPDELTVK	1/P04792	Heat shock protein beta-1	HSPB1, HSP27, HSP32	Homo sapiens (Human)
ATDFVVPGPGK	1/O75874	Isocitrate dehydrogenase [NADP] cytoplasmic	IDH1, PICD	Homo sapiens (Human)
GWPLYLSTK	1/O75874	Isocitrate dehydrogenase [NADP] cytoplasmic	IDH1, PICD	Homo sapiens (Human)
LVSGWVKPIIIGR	1/O75874	Isocitrate dehydrogenase [NADP] cytoplasmic	IDH1, PICD	Homo sapiens (Human)
TVEAEAAHGTVTR	1/O75874	Isocitrate dehydrogenase [NADP] cytoplasmic	IDH1, PICD	Homo sapiens (Human)
VEITYTPSDGTQK	1/O75874	Isocitrate dehydrogenase [NADP] cytoplasmic	IDH1, PICD	Homo sapiens (Human)
ATDFVADR	1/P48735	Isocitrate dehydrogenase [NADP], mitochondrial	IDH2	Homo sapiens (Human)
LVPGWTKPITIGR	1/P48735	Isocitrate dehydrogenase [NADP], mitochondrial	IDH3	Homo sapiens (Human)
TIEAEAAHGTVTR	1/P48735	Isocitrate dehydrogenase [NADP], mitochondrial	IDH4	Homo sapiens (Human)
YFDLGLPNR	1/P48735	Isocitrate dehydrogenase [NADP], mitochondrial	IDH5	Homo sapiens (Human)
IFGVTTLDIVR	1/P40926	Malate dehydrogenase, mitochondrial	MDH2	Homo sapiens (Human)
IQEAGTEVVK	1/P40926	Malate dehydrogenase, mitochondrial	MDH3	Homo sapiens (Human)
DSPSVWAAVPGK	1/P07737	Profilin-1	PFN1	Homo sapiens (Human)
SSFYVNGLTLGGQK	1/P07737	Profilin-1	PFN2	Homo sapiens (Human)
STGGAPTFNVTVTK	1/P07737	Profilin-1	PFN3	Homo sapiens (Human)
TFVNITPAEVGVLVGK	1/P07737	Profilin-1	PFN4	Homo sapiens (Human)
TLVLLMGK	1/P07737	Profilin-1	PFN5	Homo sapiens (Human)
HSGNITFDEIVNIAR	1/P30050	Large ribosomal subunit protein uL11	RPL12	Homo sapiens (Human)
IGPLGLSPK	1/P30050	Large ribosomal subunit protein uL11	RPL13	Homo sapiens (Human)
QAQIEVVPSASALIIK	1/P30050	Large ribosomal subunit protein uL11	RPL14	Homo sapiens (Human)
AGNLGGGVVTIER	1/P35268	Large ribosomal subunit protein eL22	RPL22	Homo sapiens (Human)
ITVTSEVPFSK	1/P35268	Large ribosomal subunit protein eL22	RPL23	Homo sapiens (Human)
ITVTSEVPFSKR	1/P35268	Large ribosomal subunit protein eL22	RPL24	Homo sapiens (Human)
SKITVTSEVPFSK	1/P35268	Large ribosomal subunit protein eL22	RPL25	Homo sapiens (Human)
GSAITGPVAK	1/P62829	Large ribosomal subunit protein uL14	RPL23	Homo sapiens (Human)
LPAAGVGDMVMATVK	1/P62829	Large ribosomal subunit protein uL14	RPL24	Homo sapiens (Human)
NLYIISVK	1/P62829	Large ribosomal subunit protein uL14	RPL25	Homo sapiens (Human)
HGYIGEFEIIDDHR	1/P62244	Small ribosomal subunit protein uS8	RPS15A, OK/SW-cl.82	Homo sapiens (Human)
IVVNLTGR	1/P62244	Small ribosomal subunit protein uS8	RPS15A, OK/SW-cl.83	Homo sapiens (Human)
MNVLADALK	1/P62244	Small ribosomal subunit protein uS8	RPS15A, OK/SW-cl.84	Homo sapiens (Human)
WQNNLLPSR	1/P62244	Small ribosomal subunit protein uS8	RPS15A, OK/SW-cl.85	Homo sapiens (Human)
ATFDAISK	1/P15880	Small ribosomal subunit protein uS5	RPS2, RPS4	Homo sapiens (Human)
GTGIVSAPVPK	1/P15880	Small ribosomal subunit protein uS5	RPS2, RPS5	Homo sapiens (Human)
TYSYLTPDLWK	1/P15880	Small ribosomal subunit protein uS5	RPS2, RPS6	Homo sapiens (Human)
AELNEFLTR	1/P23396	Small ribosomal subunit protein uS3	RPS3, OK/SW-cl.26	Homo sapiens (Human)
DEILPTTPISEQK	1/P23396	Small ribosomal subunit protein uS3	RPS3, OK/SW-cl.27	Homo sapiens (Human)
LLGGLAVR	1/P23396	Small ribosomal subunit protein uS3	RPS3, OK/SW-cl.28	Homo sapiens (Human)
EVAELTR	1/Q01082	Spectrin beta chain, non-erythrocytic 1	SPTBN1, SPTB2	Homo sapiens (Human)
LSGIEER	1/Q01082	Spectrin beta chain, non-erythrocytic 1	SPTBN1, SPTB3	Homo sapiens (Human)
VAVVNQIAR	1/Q01082	Spectrin beta chain, non-erythrocytic 1	SPTBN1, SPTB4	Homo sapiens (Human)
VLVLSQDYGK	1/Q01082	Spectrin beta chain, non-erythrocytic 1	SPTBN1, SPTB5	Homo sapiens (Human)
DHINLPGFSGQNPLR	1/P00491	Purine nucleoside phosphorylase	PNP, NP	Homo sapiens (Human)
LGADAVGMSTVPEVIVAR	1/P00491	Purine nucleoside phosphorylase	PNP, NP	Homo sapiens (Human)
VFGFSLITNK	1/P00491	Purine nucleoside phosphorylase	PNP, NP	Homo sapiens (Human)
VIMDYESLEK	1/P00491	Purine nucleoside phosphorylase	PNP, NP	Homo sapiens (Human)
ALVAYYQK	1/P62249	Small ribosomal subunit protein uS9	RPS16	Homo sapiens (Human)
EIKDILIQYDR	1/P62249	Small ribosomal subunit protein uS9	RPS17	Homo sapiens (Human)
LLEPVLLLGK	1/P62249	Small ribosomal subunit protein uS9	RPS18	Homo sapiens (Human)
TLLVADPR	1/P62249	Small ribosomal subunit protein uS9	RPS19	Homo sapiens (Human)
AIPQLQGYLR	1/Q02878	Large ribosomal subunit protein eL6	RPL6, TXREB1	Homo sapiens (Human)
AVDSQILPK	1/Q02878	Large ribosomal subunit protein eL6	RPL6, TXREB2	Homo sapiens (Human)
VLATVTKPVGGDK	1/Q02878	Large ribosomal subunit protein eL6	RPL6, TXREB3	Homo sapiens (Human)
YYPTEDVPR	1/Q02878	Large ribosomal subunit protein eL6	RPL6, TXREB4	Homo sapiens (Human)
GFSVVADTPELQR	1/Q14847	LIM and SH3 domain protein 1	LASP1, MLN50	Homo sapiens (Human)
LKQQSELQSQVR	1/Q14847	LIM and SH3 domain protein 1	LASP1, MLN51	Homo sapiens (Human)
QSFTMVADTPENLR	1/Q14847	LIM and SH3 domain protein 1	LASP1, MLN52	Homo sapiens (Human)
TQDQISNIK	1/Q14847	LIM and SH3 domain protein 1	LASP1, MLN53	Homo sapiens (Human)
AALEDTLAETEAR	1/P08727	Keratin, type I cytoskeletal 19	KRT19	Homo sapiens (Human)
DAEAWFTSR	1/P08727	Keratin, type I cytoskeletal 19	KRT20	Homo sapiens (Human)
ILGATIENSR	1/P08727	Keratin, type I cytoskeletal 19	KRT21	Homo sapiens (Human)
NHEEEISTLR	1/P08727	Keratin, type I cytoskeletal 19	KRT22	Homo sapiens (Human)
SRLEQEIATYR	1/P08727	Keratin, type I cytoskeletal 19	KRT23	Homo sapiens (Human)
ASLEAAIADAEQR	1/P05787	Keratin, type II cytoskeletal 8	KRT8, CYK8	Homo sapiens (Human)
LEGLTDEINFLR	1/P05787	Keratin, type II cytoskeletal 8	KRT8, CYK9	Homo sapiens (Human)
LQAEIEGLK	1/P05787	Keratin, type II cytoskeletal 8	KRT8, CYK10	Homo sapiens (Human)
LSELEAALQR	1/P05787	Keratin, type II cytoskeletal 8	KRT8, CYK11	Homo sapiens (Human)
YEELQSLAGK	1/P05787	Keratin, type II cytoskeletal 8	KRT8, CYK12	Homo sapiens (Human)
DVFRDPALK	1/P61353	Large ribosomal subunit protein eL27	RPL27	Homo sapiens (Human)
NIDDGTSDRPYSHALVAGIDR	1/P61353	Large ribosomal subunit protein eL27	RPL28	Homo sapiens (Human)
VVLVLAGR	1/P61353	Large ribosomal subunit protein eL27	RPL29	Homo sapiens (Human)
VYNYNHLMPTR	1/P61353	Large ribosomal subunit protein eL27	RPL30	Homo sapiens (Human)
YSVDIPLDK	1/P61353	Large ribosomal subunit protein eL27	RPL31	Homo sapiens (Human)
