# Supplementary material for: Depletion-dependent activity-based protein profiling using SWATH/DIA-MS detects serine hydrolase lipid remodeling in lung adenocarcinoma progression
Source: Nat Commun. 2025 May 27;16:4889. doi: 10.1038/s41467-025-59564-x (PMC12117057; doi:10.1038/s41467-025-59564-x)
Supplement: Supplementary file 6 — Supplementary Data 3 [file 41467_2025_59564_MOESM6_ESM.xlsx]

## Sheet: Description
Sheet	Column	Description
List of 16 subjects involved in the main cohort and in the validation LUAD cancer cohort.	Sex	Patient Characteristics
	Birth date	Patient Characteristics
	OP-Date	Date of surgery
	Lung cancer type	Deases stage
	Operation type	Lobe-resection /Tumor location
	Preoperative N stage	Node stage
	Adjuvant treatment	Therapy
	pN2	Lymph node status
	pTNM	Pathological Tumor-Node-Metastasis
	single 5/6	metastasis
	single vs. multi-level pN	metastasis
	Last follow-up	date
	Death date	Patient Characteristics
	Outcome	Survival rate
	OP-Date2	Date of second surgery
	Survival in months	Patient Characteristics
	1 - year survival	Short survivals
	5 - years survival	Long survivals
	recidive free survival (months)
	% of tumor cells in tissue block
	Smocking status Pack year	Pack per year

## Sheet: Patient information
N	Sex	Birth date	OP-Date	Lung cancer type / Stage	Operation type	Preoperative N stage	Adjuvant treatment	pN2	pTNM	single 5/6	single vs. multi-level pN	Last follow-up	Death date	Outcome	OP-Date2	Survival in months	1 - year survival	5 - years survival	recidive free survival (months)	% of tumor cells in tumor tissue block	Adjacent non-tumor (NT) tissue available	Smocking status Pack year
1	male	1934-02-03	2007-08-29	AdenoCA middle lobe / Stadium IIIA	middle lobe-resection	cN2 (7)	adj. chemo.	M in 7, 8 and mammaria interna	pT2 pN2 (10/15)		multi	2015-01-10		CNS-met 07/2009	2007-08-29	89.7	x	x	23	70	x	60
2	male	1929-05-03	2008-09-04	AdenoCA middle lobe / Stadium IIIA	extended middle lobe-resection	cN0	none	1 M in 7	pT2 pN2		single	2017-10-09			2008-09-04	110.733	x	x	111	80	x	40
3	female	1942-09-27	2009-12-01	AdenoCA left upper lobe / Stadium IIIA	extended left upper lobe resection	cN2 (5)	adj. chemo.	1 M in 5	pT1 pN2	x	single	2019-01-04			2009-12-01	110.7	x	x	91	70	x	40
4	female	1958-10-08	2010-05-21	AdenoCA left upper lobe / Stadium IIIA	left upper lobe resection	cN2 (5)	adj. chemo.	M in 4L, 5, 7	pT2 pN2		multi		2019-02-16	Diff-met 05/2011	2010-05-21	106.433	x	x	12	60	x	5
5	female	1937-05-12	2010-12-16	AdenoCA middle lobe / Stadium IIIA	middle lobe-resection	cN2 (7)	adj. chemo.	M in 2/4R and 7	pT2 pN2		multi	2015-06-12		Bone-met 04/2015, CNS-met 06/2015	2010-12-16	54.6333	x	x	53	70	x	passive exposure 30 year
6	male	1947-04-01	2005-11-08	AdenoCA right lower lobe / Stadium IIIA	right lower lobe resection	cN2	adj. chemo.	M in 1,2,3	pT2 pN2		multi		2011-02-01	Liver-met 09/2006	2005-11-08	63.7	x	x	11	70	x	20
7	male	1929-01-10	2008-04-23	AdenoCA right lower lobe / Stadium IIIA	right lower lobe resection	cN2 (2R)	adj. chemo.	M in 2,3,7	pT2 pN2		multi		2009-11-05	Lung-met 05/2009,	2008-04-23	18.7	x		13	70	x	60
8	male	1943-08-01	2009-03-10	AdenoCA right lower lobe / Stadium IIIA	extended right lower lobe resection	cN0	adj. chemo.	1 M in 7	pT2 pN2		single		2010-05-31	Diff.-met 02/2010	2009-03-10	14.9	x		11	100	x	70
9	male	1941-11-09	2010-08-06	AdenoCA right upper lobe / Stadium IIIA	right upper lobe double sleeve	cN2 (2/4R)	adj. chemo.	M in 2,3,4	pT1b pN2		multi		2013-03-30	Liver-met 03/2012	2010-08-06	32.2333	x		19	70	x	5
10	male	1944-11-05	2010-08-18	AdenoCA right upper lobe (/ Stadium IIIA	right upper lobe resection	cN0	adj. chemo.	M in 2/4R and 7	pT1b pN2		multi		2013-02-17	Local recidive 09/2011, bone met 05/2012	2010-08-18	30.4667	x		13	90	x	35
11	female	1944-07-24	2010-12-21	AdenoCA right lower lobe / Stadium IIIA	right lower lobe resection	cN0	adj. chemo.	M in 2R and 7	pT1b pN2		multi		2013-06-18	LN-met 05/2012	2010-12-21	30.3333	x		18	90	x	50
12	female	1935-07-28	2006-10-30	AdenoCA left upper lobe / Stadium IIIA	left pneumonectomy	cN0	adj. chemo.	1 M in 5	pT2 pN2		single		2007-11-16	CNS-met 09/2007	2006-10-30	12.7333	x		11	60	x	0
13	male	1950-12-11	2011-05-23	AdenoCA middle lobe / Stadium IIIA	middle lobe-resection	cN0	none	1 M in 2/4R	pT2a pN2		single		2012-09-22	Liver-met 12/2011	2011-05-23	16.2667	x		14	100	x	20
14	male	1931-07-25	2007-02-15	AdenoCA right upper lobe / Stadium IIIA	right upper lobe resection	cN0	adj. chemo.	1 M in 3	pT1 pN2 (2/14)		single		2009-10-31	Local recidive 11/2008	2007-02-15	32.9667	x		21	100	x	60
15	female	1949-04-21	2011-08-24	AdenoCA left lower lobe / Stadium IIIA	left lower lobe resection	cN0	adj. chemo.	1 M in ATS 7	pT2a pN2 (5/13)		single	4/3/2020			2011-08-24	103.833	x	x	105	90	x	0
16	male	1941-06-19	2013-02-26	AdenoCA left upper lobe / Stadium IIIA	left upper lobe sleeve	cN1	adj. Chemo	1 M in 4L	pT2a pN2 (5/10)		single	8/2/2018			2013-02-26	60.2667	x	x	66	100	x	40
