# Supplementary material for: Depletion-dependent activity-based protein profiling using SWATH/DIA-MS detects serine hydrolase lipid remodeling in lung adenocarcinoma progression
Source: Nat Commun. 2025 May 27;16:4889. doi: 10.1038/s41467-025-59564-x (PMC12117057; doi:10.1038/s41467-025-59564-x)
Supplement: Supplementary file 7 — Supplementary Data 4 [file 41467_2025_59564_MOESM7_ESM.xlsx]

## Sheet: Description
Sheet	Column	Description
(Fig. 3b_1) List of 131 SHs measured in the LUAD study and their corresponding 793 proteotypic peptides ( 916 peptide transitions) identified by SWATH-MS at peptide FDR <0.001	SH enzyme	UniProt
	Peptide	transition_name
	N of Proteotypic peptides	Number of proteotypic peptides
	pg_pvalue	peptide False Discovery Rate (FDR<0.001)
	Detected	Clinical or Intatumor cohort
	RT_mean	Retention Time

## Sheet: Supplementary Data 4
SH enzyme	Peptide	N of Proteotypic peptides	pg_pvalue (Pep FDR<0.001)	Detected in	RT_mean
O00154	14794_LMDEVAGIVAAR_2	4	5.32815E-81	Clinical cohort	3712.91
O00154	16388_MIEEAGAIISTR_2	4	6.15054E-18	Clinical cohort	3137.59
O00154	2253_ATLWYVPLSLK_2	4	6.3038E-140	Clinical cohort	5248.57
O00154	24467_VLEVPPVVYSR_2	4	2.2487E-134	Clinical cohort	3694.72
O00748	208984_WVQQNIAHFGGNPDR_2	1	8.2087E-128	Clinical cohort	2767.71
O14773	11291_ILSGRPPLGFLNPR_3	7	2.0224E-186	Clinical cohort	4031.25
O14773	13804_LFGGNFAHQASVAR_2	7	9.1382E-133	Clinical cohort	2859.06
O14773	13805_LFGGNFAHQASVAR_3	7	1.21591E-62	Clinical cohort	2662.95
O14773	16114_LYQQHGAGLFDVTR_2	7	2.6684E-132	Clinical cohort	3108.79
O14773	16115_LYQQHGAGLFDVTR_3	7	0	Clinical cohort	3116.5
O14773	2617_AYPDVAALSDGYWVVSNR_2	7	3.00821E-81	Clinical cohort	4926.68
O14773	2618_AYPDVAALSDGYWVVSNR_3	7	2.2559E-305	Clinical cohort	4933.38
O15393	143251_PLNNPWHWTAFAGILR_3	1	5.75874E-21	Clinical cohort	5376.46
O43464	172586_SQYNFIADVVEK_2	3	5.57576E-31	Clinical cohort	4232.78
O43464	186460_TQSQLAVQIR_2	3	5.69967E-06	Clinical cohort	2322.65
O43464	45572_EPLPTLPLGR_2	3	5.49736E-79	Clinical cohort	3757.15
O43866	12826_KPIWLSQMSC(UniMod:4)SGR_3	5	2.6955E-113	Clinical cohort	3085.4
O43866	15804_LVGGDNLC(UniMod:4)SGR_2	5	6.1429E-274	Clinical cohort	1780.94
O43866	4751_EATLQDC(UniMod:4)PSGPWGK_2	5	3.24507E-91	Clinical cohort	2858.22
O43866	5479_ELGC(UniMod:4)GAASGTPSGILYEPPAEK_3	5	7.53515E-35	Clinical cohort	3474.89
O43866	9014_GQWGTVC(UniMod:4)DDGWDIKDVAVLC(UniMod:4)R_3	5	1.66687E-12	Clinical cohort	4764.86
O75608	13236_LAGVTALSC(UniMod:4)WLPLR_2	3	1.14671E-07	Clinical cohort	5702.53
O75608	1394_ALIDQEVK_2	3	6.3836E-155	Clinical cohort	1957.44
O75608	2036_ASFPQGPIGGANR_2	3	3.0432E-114	Clinical cohort	2524.48
O75884	137425_NMPDPITAR_2	2	2.90579E-89	Clinical cohort	2413.79
O75884	181843_TIIIGHSSGAIAAMR_3	2	1.15462E-05	Clinical cohort	3029.04
O94830	37932_DSLGDIDSEK_2	1	4.30959E-53	Clinical cohort	2262
O95372	3713_DLAILQC(UniMod:4)HGELDPMVPVR_3	1	4.82091E-35	Clinical cohort	4627.57
O95870	232208_VMAEEGLR_2	3	1.0667E-151	Clinical cohort	1549.65
O95870	248853_YQGPVLLIR_2	3	4.68376E-08	Clinical cohort	3667.26
O95870	83182_GTADTLLNR_2	3	4.93797E-15	Clinical cohort	1989.45
P00488	10268_HVYGELDVQIQR_2	26	3.5428E-116	Clinical cohort	2924.95
P00488	10269_HVYGELDVQIQR_3	26	1.0435E-281	Clinical cohort	2923.34
P00488	12264_KDGTHVVENVDATHIGK_3	26	2.30296E-85	Clinical cohort	1809.34
P00488	12677_KLIASMSSDSLR_2	26	7.47032E-73	Clinical cohort	2405.04
P00488	12832_KPLNTEGVMK_2	26	1.7308E-192	Clinical cohort	1579.15
P00488	13258_LALETALMYGAK_2	26	1.0743E-260	Clinical cohort	4187.97
P00488	13259_LALETALM(UniMod:35)YGAK_2	26	4.199E-108	Clinical cohort	3757.63
P00488	14209_LIASMSSDSLR_2	26	0	Clinical cohort	2640.43
P00488	14210_LIASM(UniMod:35)SSDSLR_2	26	2.03087E-52	Clinical cohort	1898.15
P00488	16771_MYVAVWTPYGVLR_2	26	2.1028E-175	Clinical cohort	5270.02
P00488	18410_QIGGDGMMDITDTYK_2	26	1.67957E-94	Clinical cohort	3598.23
P00488	20714_SNVDMDFEVENAVLGK_2	26	4.36029E-77	Clinical cohort	4470.2
P00488	20715_SNVDM(UniMod:35)DFEVENAVLGK_2	26	7.23534E-30	Clinical cohort	3948.53
P00488	21178_STVLTIPEIIIK_2	26	2.76298E-88	Clinical cohort	5015.04
P00488	2471_AVPPNNSNAAEDDLPTVELQGVVPR_3	26	5.22088E-78	Clinical cohort	4417.14
P00488	25857_WDTNKVDHHTDKYENNK_4	26	1.07879E-19	Clinical cohort	1382.44
P00488	2753_C(UniMod:4)GPASVQAIK_2	26	8.2145E-262	Clinical cohort	1799
P00488	3453_DGTHVVENVDATHIGK_3	26	7.34018E-21	Clinical cohort	2235.05
P00488	3454_DGTHVVENVDATHIGK_4	26	2.25336E-21	Clinical cohort	2208.84
P00488	5336_EIRPNSTVQWEEVC(UniMod:4)RPWVSGHR_4	26	1.77E-66	Clinical cohort	3581.48
P00488	6091_ETFDVTLEPLSFK_2	26	3.5063E-166	Clinical cohort	4952.89
P00488	6092_ETFDVTLEPLSFKK_2	26	4.42099E-51	Clinical cohort	4292.74
P00488	6093_ETFDVTLEPLSFKK_3	26	8.96609E-76	Clinical cohort	4316.05
P00488	7169_FQEGQEEER_2	26	0	Clinical cohort	1084.75
P00488	9301_GTYIPVPIVSELQSGK_2	26	1.7054E-257	Clinical cohort	4942.97
P00488	9302_GTYIPVPIVSELQSGK_3	26	3.88402E-70	Clinical cohort	4916.9
P00734	10058_HQDFNSAVQLVENFC(UniMod:4)R_3	19	0	Clinical cohort	4621.84
P00734	11806_ITDNMFC(UniMod:4)AGYKPDEGKR_4	19	1.378E-119	Clinical cohort	2553.3
P00734	12940_KSPQELLC(UniMod:4)GASLISDR_3	19	4.242E-120	Clinical cohort	3720.03
P00734	13388_LAVTTHGLPC(UniMod:4)LAWASAQAK_3	19	1.2692E-297	Clinical cohort	4238.74
P00734	17541_NPDSSTTGPWC(UniMod:4)YTTDPTVR_2	19	3.5777E-44	Clinical cohort	3354.12
P00734	17542_NPDSSTTGPWC(UniMod:4)YTTDPTVR_3	19	2.0219E-124	Clinical cohort	3375.38
P00734	19354_RQEC(UniMod:4)SIPVC(UniMod:4)GQDQVTVAMTPR_3	19	1.8226E-300	Clinical cohort	3190.9
P00734	19809_SEGSSVNLSPPLEQC(UniMod:4)VPDR_3	19	1.55071E-75	Clinical cohort	3417.85
P00734	20036_SGIEC(UniMod:4)QLWR_2	19	5.7579E-184	Clinical cohort	3269.19
P00734	20785_SPQELLC(UniMod:4)GASLISDR_2	19	9.82854E-22	Clinical cohort	4125.07
P00734	21519_TATSEYQTFFNPR_2	19	7.0449E-142	Clinical cohort	3638.92
P00734	21807_TFGSGEADC(UniMod:4)GLRPLFEK_3	19	6.6447E-120	Clinical cohort	3726.65
P00734	25314_VTGWGNLK_2	19	9.45902E-41	Clinical cohort	2387.05
P00734	26371_YGFYTHVFR_2	19	1.71792E-60	Clinical cohort	3263.85
P00734	3676_DKLAAC(UniMod:4)LEGNC(UniMod:4)AEGLGTNYR_3	19	0	Clinical cohort	3197.26
P00734	5522_ELLESYIDGR_2	19	1.6997E-288	Clinical cohort	3586.63
P00734	6057_ETAASLLQAGYK_2	19	6.9827E-199	Clinical cohort	3111.64
P00734	7758_GDAC(UniMod:4)EGDSGGPFVMK_2	19	1.5942E-150	Clinical cohort	2559.3
P00734	8978_GQPSVLQVVNLPIVERPVC(UniMod:4)K_3	19	2.3081E-278	Clinical cohort	4788.66
P00736	15081_LPVANPQAC(UniMod:4)ENWLR_2	6	1.0642E-126	Clinical cohort	3692.45
P00736	16353_MGNFPWQVFTNIHGR_3	6	2.41862E-12	Clinical cohort	5071.57
P00736	18122_QDAC(UniMod:4)QGDSGGVFAVR_2	6	6.47617E-43	Clinical cohort	2535.54
P00736	26967_YTTTMGVNTYK_2	6	4.79155E-05	Clinical cohort	2182.54
P00736	4499_DYFIATC(UniMod:4)K_2	6	1.52801E-26	Clinical cohort	2587.15
P00736	6535_FC(UniMod:4)GQLGSPLGNPPGK_2	6	6.17995E-24	Clinical cohort	3052.39
P00738	10292_HYEGSTVPEK_2	26	0	Clinical cohort	1026.47
P00738	10293_HYEGSTVPEKK_2	26	5.8416E-290	Clinical cohort	808.244
P00738	10294_HYEGSTVPEKK_3	26	0	Clinical cohort	811.416
P00738	15004_LPEC(UniMod:4)EADDGC(UniMod:4)PKPPEIAHGYVEHSVR_4	26	1.41907E-34	Clinical cohort	2787.8
P00738	15342_LRTEGDGVYTLNNEK_2	26	5.0064E-162	Clinical cohort	2218.83
P00738	15343_LRTEGDGVYTLNNEK_3	26	9.4599E-308	Clinical cohort	2231.18
P00738	15344_LRTEGDGVYTLNNEK_4	26	2.2146E-211	Clinical cohort	1919.32
P00738	20808_SPVGVQPILNEHTFC(UniMod:4)AGMSK_2	26	4.3625E-193	Clinical cohort	3773.38
P00738	20810_SPVGVQPILNEHTFC(UniMod:4)AGMSK_3	26	0	Clinical cohort	3790.54
P00738	20811_SPVGVQPILNEHTFC(UniMod:4)AGM(UniMod:35)SK_3	26	3.9359E-252	Clinical cohort	3469.9
P00738	21695_TEGDGVYTLNNEK_2	26	0	Clinical cohort	2051.78
P00738	21696_TEGDGVYTLNNEK_3	26	8.0877E-155	Clinical cohort	1789.16
P00738	2397_AVGDKLPEC(UniMod:4)EADDGC(UniMod:4)PKPPEIAHGYVEHSVR_3	26	3.61982E-49	Clinical cohort	2884.07
P00738	2398_AVGDKLPEC(UniMod:4)EADDGC(UniMod:4)PKPPEIAHGYVEHSVR_4	26	0	Clinical cohort	2902.7
P00738	24069_VGYVSGWGR_2	26	0	Clinical cohort	2599.93
P00738	24731_VMPIC(UniMod:4)LPSKDYAEVGR_2	26	0	Clinical cohort	3628.21
P00738	24732_VMPIC(UniMod:4)LPSKDYAEVGR_3	26	0	Clinical cohort	3632.75
P00738	24733_VM(UniMod:35)PIC(UniMod:4)LPSKDYAEVGR_3	26	6.4507E-226	Clinical cohort	3231.42
P00738	25392_VTSIQDWVQK_2	26	0	Clinical cohort	3238.18
P00738	25589_VVLHPNYSQVDIGLIK_2	26	4.7186E-117	Clinical cohort	3935.27
P00738	25590_VVLHPNYSQVDIGLIK_3	26	0	Clinical cohort	3926.83
P00738	27019_YVMLPVADQDQC(UniMod:4)IR_2	26	0	Clinical cohort	3631
P00738	27020_YVM(UniMod:35)LPVADQDQC(UniMod:4)IR_2	26	4.0295E-296	Clinical cohort	3257.76
P00738	27021_YVMLPVADQDQC(UniMod:4)IR_3	26	0	Clinical cohort	3631.04
P00738	27022_YVM(UniMod:35)LPVADQDQC(UniMod:4)IR_3	26	1.986E-129	Clinical cohort	3261.66
P00738	4480_DYAEVGR_2	26	0	Clinical cohort	1326.96
P00739	20812_SPVGVQPILNEHTFC(UniMod:4)VGMSK_3	3	6.24308E-24	Clinical cohort	4089.27
P00739	24068_VGYVSGWGQSDNFK_2	3	1.5538E-118	Clinical cohort	3328.94
P00739	25588_VVLHPNYHQVDIGLIK_4	3	8.3499E-99	Clinical cohort	3558.85
P00740	19609_SC(UniMod:4)EPAVPFPC(UniMod:4)GR_2	4	3.04646E-78	Clinical cohort	2947.44
P00740	23462_VDAFC(UniMod:4)GGSIVNEK_2	4	1.56501E-63	Clinical cohort	2764.46
P00740	25479_VVC(UniMod:4)SC(UniMod:4)TEGYR_2	4	2.00054E-97	Clinical cohort	1403.73
P00740	6810_FGSGYVSGWGR_2	4	9.72922E-44	Clinical cohort	3118.78
P00742	57125_ETYDFDIAVLR_2	1	1.78687E-26	Clinical cohort	4518.4
P00746	183209_RPDSLQHVLLPVLDR_3	3	2.86621E-11	Clinical cohort	4033.74
P00746	19440_ATLGPAVRPLPWQR_3	3	1.28587E-50	Clinical cohort	3616.7
P00746	223718_VDRDVAPGTLC(UniMod:4)DVAGWGIVNHAGR_4	3	6.21824E-08	Clinical cohort	3942.6
P00747	10139_HSIFTPETNPR_2	21	3.2443E-147	Clinical cohort	2009.08
P00747	10140_HSIFTPETNPR_3	21	1.5219E-99	Clinical cohort	2070.93
P00747	12744_KLYDYC(UniMod:4)DVPQC(UniMod:4)AAPSFDC(UniMod:4)GKPQVEPK_4	21	7.6914E-259	Clinical cohort	3326.29
P00747	13077_KVYLSEC(UniMod:4)K_2	21	8.11821E-14	Clinical cohort	1306.84
P00747	15521_LSSPAVITDK_2	21	7.89174E-16	Clinical cohort	2266.24
P00747	17284_NLDENYC(UniMod:4)R_2	21	4.3763E-285	Clinical cohort	1501.5
P00747	17528_NPDADKGPWC(UniMod:4)FTTDPSVR_3	21	5.5878E-147	Clinical cohort	3496.92
P00747	17538_NPDNDPQGPWC(UniMod:4)YTTDPEKR_3	21	1.8977E-136	Clinical cohort	2954.07
P00747	18526_QLGAGSIEEC(UniMod:4)AAK_2	21	3.1897E-171	Clinical cohort	2256.66
P00747	19034_RAPWC(UniMod:4)HTTNSQVR_3	21	3.34969E-45	Clinical cohort	1488.16
P00747	22529_TPENFPC(UniMod:4)K_2	21	3.0407E-141	Clinical cohort	1583.59
P00747	2283_ATTVTGTPC(UniMod:4)QDWAAQEPHR_3	21	0	Clinical cohort	2535.8
P00747	24233_VILGAHQEVNLEPHVQEIEVSR_3	21	1.43851E-42	Clinical cohort	3598.2
P00747	24234_VILGAHQEVNLEPHVQEIEVSR_4	21	1.3985E-183	Clinical cohort	3609.64
P00747	24262_VIPAC(UniMod:4)LPSPNYVVADR_2	21	1.3787E-251	Clinical cohort	3865.67
P00747	25541_VVGGC(UniMod:4)VAHPHSWPWQVSLR_4	21	1.9682E-120	Clinical cohort	3895.6
P00747	25776_VYLSEC(UniMod:4)K_2	21	6.3305E-220	Clinical cohort	1532.59
P00747	25865_WELC(UniMod:4)DIPR_2	21	0	Clinical cohort	3699
P00747	4720_EAQLPVIENK_2	21	3.357E-259	Clinical cohort	2596.69
P00747	5585_ELRPWC(UniMod:4)FTTDPNKR_3	21	4.88905E-22	Clinical cohort	3228.84
P00747	7313_FSPATHPSEGLEENYC(UniMod:4)R_3	21	2.2155E-226	Clinical cohort	2434.78
P00748	14139_LHEAFSPVSYQHDLALLR_3	3	1.31347E-09	Clinical cohort	4254.75
P00748	14140_LHEAFSPVSYQHDLALLR_4	3	2.8022E-112	Clinical cohort	4217.9
P00748	25542_VVGGLVALR_2	3	2.6376E-242	Clinical cohort	3017.64
P00751	11769_ISVIRPSK_2	27	8.0062E-257	Clinical cohort	1560.47
P00751	1360_ALFVSEEEK_2	27	2.02172E-91	Clinical cohort	2390.77
P00751	1361_ALFVSEEEKK_2	27	0	Clinical cohort	1963.49
P00751	13622_LEDSVTYHC(UniMod:4)SR_2	27	1.6628E-285	Clinical cohort	1558.64
P00751	13623_LEDSVTYHC(UniMod:4)SR_3	27	0	Clinical cohort	1561.24
P00751	14696_LLQEGQALEYVC(UniMod:4)PSGFYPYPVQTR_3	27	0	Clinical cohort	4971.31
P00751	15058_LPPTTTC(UniMod:4)QQQK_2	27	1.66979E-71	Clinical cohort	1151.54
P00751	15132_LQDEDLGFL_2	27	2.87787E-45	Clinical cohort	4578.26
P00751	18561_QLNEINYEDHK_2	27	6.21909E-48	Clinical cohort	1820.51
P00751	18562_QLNEINYEDHK_3	27	4.1515E-186	Clinical cohort	1851.86
P00751	21111_STGSWSTLK_2	27	0	Clinical cohort	2059.47
P00751	23363_VASYGVKPR_2	27	2.1717E-118	Clinical cohort	1180.01
P00751	24316_VKDISEVVTPR_2	27	1.9215E-176	Clinical cohort	2183.87
P00751	25125_VSEADSSNADWVTK_2	27	0	Clinical cohort	2260.25
P00751	26403_YGLVTYATYPK_2	27	0	Clinical cohort	3297.46
P00751	26423_YGQTIRPIC(UniMod:4)LPC(UniMod:4)TEGTTR_3	27	0	Clinical cohort	3262.69
P00751	2840_C(UniMod:4)LVNLIEK_2	27	5.9312E-263	Clinical cohort	3400.9
P00751	3121_DAQYAPGYDK_2	27	0	Clinical cohort	1535.77
P00751	3613_DISEVVTPR_2	27	6.9741E-267	Clinical cohort	2407.27
P00751	3829_DLLYIGK_2	27	2.3849E-219	Clinical cohort	3153.04
P00751	3976_DNEQHVFK_2	27	4.67216E-15	Clinical cohort	1126.66
P00751	4642_EAGIPEFYDYDVALIK_2	27	1.6749E-224	Clinical cohort	5185.41
P00751	4940_EELLPAQDIK_2	27	0	Clinical cohort	2891.75
P00751	5389_EKLQDEDLGFL_2	27	8.8694E-12	Clinical cohort	4235.15
P00751	6925_FLC(UniMod:4)TGGVSPYADPNTC(UniMod:4)R_2	27	0	Clinical cohort	3066.84
P00751	6926_FLC(UniMod:4)TGGVSPYADPNTC(UniMod:4)R_3	27	1.751E-294	Clinical cohort	3063.49
P00751	7834_GDSGGPLIVHK_2	27	2.2231E-264	Clinical cohort	1585.39
P01266	61521_GFC(UniMod:4)QIQVK_2	1	8.6553E-161	Clinical cohort	2335.08
P02787	10097_HQTVPQNTGGK_2	92	0	Clinical cohort	667.466
P02787	10099_HQTVPQNTGGKNPDPWAK_3	92	2.1655E-170	Clinical cohort	1919.8
P02787	10164_HSTIFENLANK_2	92	5.1272E-207	Clinical cohort	2576.25
P02787	10165_HSTIFENLANK_3	92	0	Clinical cohort	2654.37
P02787	10166_HSTIFENLANKADR_3	92	6.13578E-20	Clinical cohort	2762.16
P02787	10167_HSTIFENLANKADRDQYELLC(UniMod:4)LDNTR_4	92	5.0973E-221	Clinical cohort	4542.71
P02787	10585_IEC(UniMod:4)VSAETTEDC(UniMod:4)IAK_2	92	0	Clinical cohort	2464.25
P02787	10586_IEC(UniMod:4)VSAETTEDC(UniMod:4)IAK_3	92	0	Clinical cohort	2465.95
P02787	11365_IMNGEADAMSLDGGFVYIAGK_3	92	1.5299E-112	Clinical cohort	4865.41
P02787	11367_IM(UniMod:35)NGEADAM(UniMod:35)SLDGGFVYIAGK_3	92	3.0512E-107	Clinical cohort	4112.98
P02787	12202_KASYLDC(UniMod:4)IR_2	92	0	Clinical cohort	2315.67
P02787	12237_KC(UniMod:4)STSSLLEAC(UniMod:4)TFR_2	92	1.2468E-181	Clinical cohort	3070.56
P02787	12238_KC(UniMod:4)STSSLLEAC(UniMod:4)TFR_3	92	0	Clinical cohort	3070.56
P02787	12281_KDSGFQMNQLR_2	92	1.782E-303	Clinical cohort	2344.75
P02787	12283_KDSGFQMNQLR_3	92	4.8041E-298	Clinical cohort	2332.02
P02787	12284_KDSGFQM(UniMod:35)NQLR_3	92	4.74765E-49	Clinical cohort	1547.3
P02787	12845_KPVDEYKDC(UniMod:4)HLAQVPSHTVVAR_3	92	0	Clinical cohort	2379.71
P02787	12846_KPVDEYKDC(UniMod:4)HLAQVPSHTVVAR_4	92	0	Clinical cohort	2380.14
P02787	12847_KPVDEYKDC(UniMod:4)HLAQVPSHTVVAR_5	92	0	Clinical cohort	2380.17
P02787	12848_KPVDEYKDC(UniMod:4)HLAQVPSHTVVAR_6	92	3.8183E-231	Clinical cohort	2371.75
P02787	12849_KPVEEYANC(UniMod:4)HLAR_2	92	0	Clinical cohort	1793.84
P02787	12850_KPVEEYANC(UniMod:4)HLAR_3	92	0	Clinical cohort	1790.95
P02787	12917_KSASDLTWDNLK_2	92	3.4783E-105	Clinical cohort	2921.3
P02787	12918_KSASDLTWDNLK_3	92	9.9588E-245	Clinical cohort	2926.63
P02787	13420_LC(UniMod:4)MGSGLNLC(UniMod:4)EPNNK_2	92	0	Clinical cohort	3309.64
P02787	13421_LC(UniMod:4)M(UniMod:35)GSGLNLC(UniMod:4)EPNNK_2	92	1.7387E-292	Clinical cohort	2522.17
P02787	13422_LC(UniMod:4)MGSGLNLC(UniMod:4)EPNNK_3	92	0	Clinical cohort	3309.9
P02787	13423_LC(UniMod:4)M(UniMod:35)GSGLNLC(UniMod:4)EPNNK_3	92	2.6576E-210	Clinical cohort	2526.42
P02787	13424_LC(UniMod:4)MGSGLNLC(UniMod:4)EPNNKEGYYGYTGAFR_3	92	2.14945E-80	Clinical cohort	4280.25
P02787	14337_LKC(UniMod:4)DEWSVNSVGK_2	92	0	Clinical cohort	2509.04
P02787	14338_LKC(UniMod:4)DEWSVNSVGK_3	92	0	Clinical cohort	2508.95
P02787	16760_MYLGYEYVTAIR_2	92	0	Clinical cohort	4348.84
P02787	16761_M(UniMod:35)YLGYEYVTAIR_2	92	0	Clinical cohort	3968.26
P02787	16762_MYLGYEYVTAIR_3	92	1.6804E-295	Clinical cohort	4345.55
P02787	17356_NLNEKDYELLC(UniMod:4)LDGTR_2	92	0	Clinical cohort	3705.62
P02787	17357_NLNEKDYELLC(UniMod:4)LDGTR_3	92	0	Clinical cohort	3709.97
P02787	17539_NPDPWAK_2	92	0	Clinical cohort	1827.67
P02787	1791_APNHAVVTR_2	92	0	Clinical cohort	822.665
P02787	18718_QQQHLFGSNVTDC(UniMod:4)SGNFC(UniMod:4)LFR_3	92	2.02832E-22	Clinical cohort	4505.78
P02787	19511_SAGWNIPIGLLYC(UniMod:4)DLPEPR_3	92	8.76419E-23	Clinical cohort	5710.6
P02787	19545_SASDLTWDNLK_2	92	0	Clinical cohort	3332.53
P02787	19624_SC(UniMod:4)HTAVGR_2	92	0	Clinical cohort	674.092
P02787	19625_SC(UniMod:4)HTGLGR_2	92	3.06007E-70	Clinical cohort	690.068
P02787	20319_SKEFQLFSSPHGK_2	92	7.4299E-254	Clinical cohort	2537.01
P02787	20320_SKEFQLFSSPHGK_3	92	0	Clinical cohort	2567.9
P02787	20614_SMGGKEDLIWELLNQAQEHFGK_4	92	5.00576E-05	Clinical cohort	5709.48
P02787	20616_SMGGKEDLIWELLNQAQEHFGKDK_4	92	5.23243E-09	Clinical cohort	5706.09
P02787	20617_SM(UniMod:35)GGKEDLIWELLNQAQEHFGKDK_4	92	6.05636E-29	Clinical cohort	5640.85
P02787	21223_SVIPSDGPSVAC(UniMod:4)VK_2	92	0	Clinical cohort	2823.53
P02787	21224_SVIPSDGPSVAC(UniMod:4)VK_3	92	5.6887E-108	Clinical cohort	2853.33
P02787	21226_SVIPSDGPSVAC(UniMod:4)VKK_3	92	1.0626E-120	Clinical cohort	2439.48
P02787	21448_TAGWNIPMGLLYNK_2	92	0	Clinical cohort	5220.2
P02787	21449_TAGWNIPM(UniMod:35)GLLYNK_2	92	4.11388E-89	Clinical cohort	4546.92
P02787	21450_TAGWNIPMGLLYNK_3	92	4.8541E-238	Clinical cohort	5220.98
P02787	2154_ASYLDC(UniMod:4)IR_2	92	0	Clinical cohort	2725.32
P02787	2405_AVGNLRKC(UniMod:4)STSSLLEAC(UniMod:4)TFR_3	92	3.47141E-74	Clinical cohort	4124.87
P02787	25829_WC(UniMod:4)ALSHHER_2	92	8.5214E-191	Clinical cohort	1317.64
P02787	25831_WC(UniMod:4)AVSEHEATK_2	92	0	Clinical cohort	1575.71
P02787	25832_WC(UniMod:4)AVSEHEATK_3	92	0	Clinical cohort	1575.5
P02787	26599_YLGEEYVK_2	92	0	Clinical cohort	2599.02
P02787	2689_C(UniMod:4)DEWSVNSVGK_2	92	0	Clinical cohort	2519.4
P02787	2824_C(UniMod:4)LKDGAGDVAFVK_2	92	9.91877E-81	Clinical cohort	2457.91
P02787	2825_C(UniMod:4)LKDGAGDVAFVK_3	92	6.8753E-278	Clinical cohort	2479.6
P02787	2947_C(UniMod:4)STSSLLEAC(UniMod:4)TFR_2	92	0	Clinical cohort	3408.16
P02787	2948_C(UniMod:4)STSSLLEAC(UniMod:4)TFR_3	92	0	Clinical cohort	3447
P02787	3163_DC(UniMod:4)HLAQVPSHTVVAR_2	92	4.99911E-94	Clinical cohort	2184.78
P02787	3164_DC(UniMod:4)HLAQVPSHTVVAR_3	92	1.8788E-249	Clinical cohort	2200.02
P02787	3165_DC(UniMod:4)HLAQVPSHTVVAR_4	92	1.9419E-305	Clinical cohort	2191.31
P02787	3226_DDTVC(UniMod:4)LAK_2	92	0	Clinical cohort	1592.28
P02787	3342_DGAGDVAFVK_2	92	0	Clinical cohort	2344.29
P02787	3816_DLLFRDDTVC(UniMod:4)LAK_2	92	0	Clinical cohort	3885.28
P02787	3817_DLLFRDDTVC(UniMod:4)LAK_3	92	0	Clinical cohort	3885.11
P02787	4133_DQYELLC(UniMod:4)LDNTR_2	92	3.6815E-205	Clinical cohort	3776.17
P02787	4134_DQYELLC(UniMod:4)LDNTR_3	92	2.00041E-90	Clinical cohort	3822.42
P02787	4151_DSAHGFLK_2	92	0	Clinical cohort	1609.19
P02787	4178_DSGFQMNQLR_2	92	0	Clinical cohort	2763.47
P02787	4179_DSGFQM(UniMod:35)NQLR_2	92	3.2496E-302	Clinical cohort	1852.01
P02787	4489_DYELLC(UniMod:4)LDGTR_2	92	5.3256E-237	Clinical cohort	3954.96
P02787	455_ADRDQYELLC(UniMod:4)LDNTR_2	92	1.4504E-168	Clinical cohort	3424.02
P02787	456_ADRDQYELLC(UniMod:4)LDNTR_3	92	0	Clinical cohort	3423.17
P02787	4846_EDLIWELLNQAQEHFGK_4	92	3.02423E-28	Clinical cohort	5641.48
P02787	4859_EDPQTFYYAVAVVK_2	92	0	Clinical cohort	4308.97
P02787	4860_EDPQTFYYAVAVVK_3	92	0	Clinical cohort	4311.61
P02787	5016_EFQLFSSPHGK_2	92	1.0581E-237	Clinical cohort	3127.36
P02787	5017_EFQLFSSPHGK_3	92	1.23668E-33	Clinical cohort	2923.04
P02787	5190_EGTC(UniMod:4)PEAPTDEC(UniMod:4)KPVK_2	92	0	Clinical cohort	1544.79
P02787	5191_EGTC(UniMod:4)PEAPTDEC(UniMod:4)KPVK_3	92	0	Clinical cohort	1544.64
P02787	5215_EGYYGYTGAFR_2	92	0	Clinical cohort	3141.61
P02787	6566_FDEFFSEGC(UniMod:4)APGSK_2	92	0	Clinical cohort	3402.82
P02787	6567_FDEFFSEGC(UniMod:4)APGSK_3	92	0	Clinical cohort	3405.48
P02787	6568_FDEFFSEGC(UniMod:4)APGSKK_2	92	0	Clinical cohort	3071.33
P02787	6569_FDEFFSEGC(UniMod:4)APGSKK_3	92	0	Clinical cohort	3069.96
P02788	10562_IDSGLYLGSGYFTAIQNLR_2	51	1.87611E-21	Clinical cohort	5540.54
P02788	10563_IDSGLYLGSGYFTAIQNLR_3	51	2.7884E-66	Clinical cohort	5531.24
P02788	12447_KGGSFQLNELQGLK_2	51	7.70851E-08	Clinical cohort	3429.15
P02788	12448_KGGSFQLNELQGLK_3	51	4.4832E-141	Clinical cohort	3383.36
P02788	13176_LADFALLC(UniMod:4)LDGK_2	51	0	Clinical cohort	4800
P02788	13400_LC(UniMod:4)AGTGENK_2	51	2.1233E-150	Clinical cohort	723.214
P02788	15328_LRPVAAEVYGTER_2	51	3.89472E-65	Clinical cohort	2291.48
P02788	15329_LRPVAAEVYGTER_3	51	0	Clinical cohort	2329.74
P02788	17099_NGSDC(UniMod:4)PDKFC(UniMod:4)LFQSETK_3	51	2.15364E-77	Clinical cohort	3319.64
P02788	17336_NLLFNDNTEC(UniMod:4)LAR_2	51	0	Clinical cohort	3706.8
P02788	17337_NLLFNDNTEC(UniMod:4)LAR_3	51	1.1175E-06	Clinical cohort	3806.79
P02788	18922_QVLLHQQAK_2	51	2.01525E-63	Clinical cohort	1184.48
P02788	19389_RSDTSLTWNSVK_2	51	2.08017E-32	Clinical cohort	2404.51
P02788	19390_RSDTSLTWNSVK_3	51	1.589E-200	Clinical cohort	2427.56
P02788	19620_SC(UniMod:4)HLAM(UniMod:35)APNHAVVSR_3	51	2.83974E-60	Clinical cohort	1557.91
P02788	19621_SC(UniMod:4)HLAMAPNHAVVSR_4	51	2.138E-269	Clinical cohort	1930.11
P02788	19622_SC(UniMod:4)HLAM(UniMod:35)APNHAVVSR_4	51	8.7093E-115	Clinical cohort	1568.32
P02788	19739_SDTSLTWNSVK_2	51	7.2398E-162	Clinical cohort	2734.64
P02788	20682_SNLC(UniMod:4)ALC(UniMod:4)IGDEQGENK_2	51	3.0234E-241	Clinical cohort	3004.84
P02788	20683_SNLC(UniMod:4)ALC(UniMod:4)IGDEQGENK_3	51	3.0719E-107	Clinical cohort	2993.07
P02788	20886_SQQSSDPDPNC(UniMod:4)VDRPVEGYLAVAVVR_3	51	1.5058E-224	Clinical cohort	4159.43
P02788	20887_SQQSSDPDPNC(UniMod:4)VDRPVEGYLAVAVVR_4	51	3.6989E-208	Clinical cohort	4153.72
P02788	21245_SVNGKEDAIWNLLR_3	51	1.2066E-111	Clinical cohort	4607.33
P02788	21262_SVQWC(UniMod:4)AVSQPEATK_2	51	1.4816E-243	Clinical cohort	2640.77
P02788	24958_VPSHAVVAR_2	51	8.8745E-272	Clinical cohort	1085.39
P02788	25707_VVWC(UniMod:4)AVGEQELR_2	51	4.0136E-249	Clinical cohort	3504.46
P02788	25708_VVWC(UniMod:4)AVGEQELRK_3	51	1.84084E-22	Clinical cohort	3133.49
P02788	2654_C(UniMod:4)AFSSQEPYFSYSGAFK_2	51	8.85176E-69	Clinical cohort	4210.05
P02788	26609_YLGPQYVAGITNLK_2	51	5.65E-177	Clinical cohort	4137.04
P02788	26610_YLGPQYVAGITNLKK_2	51	6.51367E-41	Clinical cohort	3598.54
P02788	26611_YLGPQYVAGITNLKK_3	51	1.13E-287	Clinical cohort	3650.48
P02788	2751_C(UniMod:4)GLVPVLAENYK_2	51	2.985E-187	Clinical cohort	3816.68
P02788	2794_C(UniMod:4)LAENAGDVAFVK_2	51	2.9979E-307	Clinical cohort	3093.91
P02788	2946_C(UniMod:4)STSPLLEAC(UniMod:4)EFLR_2	51	2.5497E-107	Clinical cohort	5009.56
P02788	3341_DGAGDVAFIR_2	51	0	Clinical cohort	2818.53
P02788	4152_DSAIGFSR_2	51	0	Clinical cohort	1972.75
P02788	4217_DSPIQC(UniMod:4)IQAIAENR_2	51	1.5684E-160	Clinical cohort	4664.81
P02788	4218_DSPIQC(UniMod:4)IQAIAENR_3	51	2.5206E-206	Clinical cohort	4655.18
P02788	4449_DVTVLQNTDGNNNEAWAK_2	51	3.84125E-30	Clinical cohort	3113.7
P02788	4806_EDAIWNLLR_2	51	2.3937E-200	Clinical cohort	5026.37
P02788	6041_ESTVFEDLSDEAER_2	51	6.08668E-10	Clinical cohort	3910.48
P02788	6540_FC(UniMod:4)LFQSETK_2	51	3.74809E-46	Clinical cohort	3372.03
P02788	6574_FDEYFSQSC(UniMod:4)APGSDPR_2	51	6.1724E-175	Clinical cohort	2907.81
P02788	6575_FDEYFSQSC(UniMod:4)APGSDPR_3	51	8.4722E-181	Clinical cohort	2907.63
P02788	6732_FFSASC(UniMod:4)VPGADK_2	51	2.0973E-171	Clinical cohort	2787.47
P02788	6733_FFSASC(UniMod:4)VPGADKGQFPNLC(UniMod:4)R_3	51	2.4096E-99	Clinical cohort	3825.31
P02788	6896_FKDC(UniMod:4)HLAR_2	51	5.35745E-31	Clinical cohort	1069.9
P02788	7188_FQLFGSPSGQK_2	51	0	Clinical cohort	3440.73
P02788	7879_GEADAMSLDGGYVYTAGK_2	51	1.08348E-96	Clinical cohort	3397.83
P02788	8222_GGSFQLNELQGLK_2	51	8.8784E-141	Clinical cohort	3896.17
P02788	8863_GPPVSC(UniMod:4)IK_2	51	2.523E-101	Clinical cohort	1577.47
P03951	216947_TSESGLPSTR_2	1	7.88112E-14	Clinical cohort	1389.45
P03952	15466_LSMDGSPTR_2	3	6.96409E-49	Clinical cohort	1574.67
P03952	24650_VLTPDAFVC(UniMod:4)R_2	3	2.7467E-195	Clinical cohort	3399.29
P03952	9391_GVNVC(UniMod:4)QETC(UniMod:4)TK_2	3	2.27027E-55	Clinical cohort	1447.75
P04070	208993_TFVLNFIK_2	1	3.50322E-13	Clinical cohort	4614.96
P04180	105277_LDKPDVVNWMC(UniMod:4)YR_3	1	1.24595E-07	Clinical cohort	3679.3
P05156	11965_IVIEYVDR_2	8	3.9203E-220	Clinical cohort	2877.35
P05156	1903_AQLGDLPWQVAIK_2	8	2.0686E-256	Clinical cohort	4736.79
P05156	19943_SFPTYC(UniMod:4)QQK_2	8	9.0735E-115	Clinical cohort	1972.96
P05156	23799_VFC(UniMod:4)QPWQR_2	8	1.2118E-292	Clinical cohort	2696.67
P05156	23886_VFSLQWGEVK_2	8	4.5567E-276	Clinical cohort	4216.78
P05156	8526_GLETSLAEC(UniMod:4)TFTK_2	8	2.4739E-298	Clinical cohort	3419.25
P05156	9754_HGNTDSEGIVEVK_2	8	4.10448E-32	Clinical cohort	1699.51
P05156	9755_HGNTDSEGIVEVK_3	8	1.0208E-253	Clinical cohort	1710.92
P06276	186231_TQILVGVNKDEGTAFLVYGAPGFSK_3	2	8.77911E-10	Clinical cohort	4981.3
P06276	83026_IFFPGVSEFGK_2	2	3.18812E-42	Clinical cohort	4620.47
P06681	12786_KNQGILEFYGDDIALLK_3	7	3.6764E-142	Clinical cohort	5132.31
P06681	20985_SSGQWQTPGATR_2	7	1.6881E-176	Clinical cohort	1800.8
P06681	2419_AVISPGFDVFAK_2	7	4.8672E-215	Clinical cohort	4298.94
P06681	24559_VLMSVLNDNSR_2	7	6.3101E-61	Clinical cohort	3096.36
P06681	3496_DHENELLNK_2	7	5.66687E-61	Clinical cohort	1475.74
P06681	7648_GALISDQWVLTAAHC(UniMod:4)FR_3	7	4.1943E-148	Clinical cohort	5156.14
P06681	9575_HAFILQDTK_2	7	1.58066E-09	Clinical cohort	2095.34
P06870	204258_VTDFMLC(UniMod:4)VGHLEGGK_3	2	6.22325E-07	Clinical cohort	3843.38
P06870	92102_IVGGWEC(UniMod:4)EQHSQPWQAALYHFSTFQC(UniMod:4)GGILVHR_5	2	7.81273E-13	Clinical cohort	5348.57
P07099	111712_LISYSYMVR_2	20	0	Clinical cohort	3299.62
P07099	134641_NHGLSDEHVFEVIC(UniMod:4)PSIPGYGFSEASSK_3	20	5.81642E-40	Clinical cohort	4644.67
P07099	134642_NHGLSDEHVFEVIC(UniMod:4)PSIPGYGFSEASSK_4	20	2.8674E-113	Clinical cohort	4671.49
P07099	143196_PLLMVHGWPGSFYEFYK_3	20	2.98489E-07	Clinical cohort	5490.95
P07099	152540_QVEILNR_2	20	5.3024E-147	Clinical cohort	2032.25
P07099	182451_TKIEGLDIHFIHVKPPQLPAGHTPK_5	20	9.7379E-10	Clinical cohort	3857.61
P07099	193778_VETSDEEIHDLHQR_3	20	1.3843E-15	Clinical cohort	1730.12
P07099	193779_VETSDEEIHDLHQR_4	20	4.70627E-23	Clinical cohort	1745.56
P07099	194630_VFYSLMR_2	20	2.2546E-177	Clinical cohort	3324.66
P07099	212195_YLEDGGLER_2	20	0	Clinical cohort	5111.23
P07099	34202_DVELLYPVK_2	20	0	Clinical cohort	1858.19
P07099	37379_EDDSIRPFKVETSDEEIHDLHQR_4	20	1.14148E-35	Clinical cohort	2940.61
P07099	45026_ENLGQGWMTQK_2	20	7.29055E-40	Clinical cohort	2894.17
P07099	56987_FSTWTNTEFR_2	20	0	Clinical cohort	4832.71
P07099	57347_FTPPLEDSC(UniMod:4)FHYGFNSNYLK_3	20	1.00301E-56	Clinical cohort	4553.45
P07099	58318_FYKENLGQGWMTQK_3	20	1.37229E-13	Clinical cohort	3206.79
P07099	61944_GFNSVATAR_2	20	1.46426E-12	Clinical cohort	1585.39
P07099	62605_GGHFAAFEEPELLAQDIR_3	20	0	Clinical cohort	2591.49
P07099	62607_GGHFAAFEEPELLAQDIRK_4	20	4.4108E-20	Clinical cohort	4246.3
P07099	85264_IIPLLTDPK_2	20	1.2826E-228	Clinical cohort	3668.9
P07478	122046_LSSPAVINSR_2	1	9.63996E-37	Clinical cohort	1890.92
P08246	14045_LGNGVQC(UniMod:4)LAMGWGLLGR_2	9	2.96003E-46	Clinical cohort	5518.86
P08246	14047_LGNGVQC(UniMod:4)LAMGWGLLGR_3	9	4.88333E-44	Clinical cohort	5559.83
P08246	18050_QAGVC(UniMod:4)FGDSGSPLVC(UniMod:4)NGLIHGIASFVR_3	9	1.59535E-30	Clinical cohort	5653.36
P08246	19237_RLGNGVQC(UniMod:4)LAMGWGLLGR_3	9	1.24976E-36	Clinical cohort	5066.13
P08246	19395_RSNVC(UniMod:4)TLVR_2	9	2.00094E-82	Clinical cohort	1570.73
P08246	1989_ARPHAWPFMVSLQLR_4	9	2.32609E-13	Clinical cohort	4591.87
P08246	20713_SNVC(UniMod:4)TLVR_2	9	0	Clinical cohort	3319.3
P08246	25586_VVLGAHNLSR_2	9	8.7885E-236	Clinical cohort	1848.81
P08246	8172_GGHFC(UniMod:4)GATLIAPNFVMSAAHC(UniMod:4)VANVNVR_4	9	5.756E-166	Clinical cohort	5184.23
P08311	10735_IFGSYDPR_2	9	1.2323E-181	Clinical cohort	2465.79
P08311	17882_NVNPVALPR_2	9	4.8863E-292	Clinical cohort	2486.49
P08311	1865_AQEGLRPGTLC(UniMod:4)TVAGWGR_3	9	2.1522E-255	Clinical cohort	3579.32
P08311	20988_SSGVPPEVFTR_2	9	1.4779E-39	Clinical cohort	2612.22
P08311	22141_TIQNDIMLLQLSR_2	9	8.877E-191	Clinical cohort	4747.65
P08311	25205_VSSFLPWIR_2	9	4.5574E-298	Clinical cohort	5048.09
P08311	2746_C(UniMod:4)GGFLVR_2	9	2.0075E-44	Clinical cohort	2294.29
P08311	5766_ENTQQHITAR_3	9	5.3953E-106	Clinical cohort	819.008
P08311	7837_GDSGGPLLC(UniMod:4)NNVAHGIVSYGK_3	9	1.29296E-74	Clinical cohort	3594.23
P08519	17529_NPDAVAAPYC(UniMod:4)YTR_2	3	1.97196E-96	Clinical cohort	2537.2
P08519	22542_TPEYYPNAGLIMNYC(UniMod:4)R_2	3	5.03485E-08	Clinical cohort	4086.51
P08519	9304_GTYSTTVTGR_2	3	3.14471E-94	Clinical cohort	1419.45
P08582	187818_SC(UniMod:4)HAGFGSPAGWDVPVGALIQR_3	1	1.05284E-06	Clinical cohort	4810.41
P08709	191459_VAQVIIPSTYVPGTTNHDIALLR_4	1	2.18026E-70	Clinical cohort	4660.78
P09467	12119_IYSLNEGYAR_2	22	3.15952E-32	Clinical cohort	2576.52
P09467	12171_KAGIAHLYGIAGSTNVTGDQVK_3	22	6.1721E-257	Clinical cohort	3034.3
P09467	12172_KAGIAHLYGIAGSTNVTGDQVK_4	22	0	Clinical cohort	2030.61
P09467	12623_KLDVLSNDLVMNMLK_2	22	7.64493E-21	Clinical cohort	5172.66
P09467	12624_KLDVLSNDLVMNMLK_3	22	0	Clinical cohort	3676.7
P09467	14784_LLYEC(UniMod:4)NPMAYVMEK_2	22	4.2855E-204	Clinical cohort	4727.69
P09467	1821_APVILGSPDDVLEFLK_2	22	1.21977E-19	Clinical cohort	5711.05
P09467	20963_SSFATC(UniMod:4)VLVSEEDKHAIIVEPEKR_4	22	9.5678E-190	Clinical cohort	3655.74
P09467	20964_SSFATC(UniMod:4)VLVSEEDKHAIIVEPEKR_5	22	1.2639E-237	Clinical cohort	3649.42
P09467	21079_STDEPSEKDALQPGR_2	22	4.05371E-51	Clinical cohort	1633.5
P09467	21080_STDEPSEKDALQPGR_3	22	2.0469E-268	Clinical cohort	1654.52
P09467	22393_TLVYGGIFLYPANK_2	22	1.4152E-305	Clinical cohort	4776.93
P09467	22394_TLVYGGIFLYPANKK_2	22	2.19455E-32	Clinical cohort	4319.61
P09467	22395_TLVYGGIFLYPANKK_3	22	1.8714E-268	Clinical cohort	4292.22
P09467	3274_DFDPAVTEYIQR_2	22	2.6756E-294	Clinical cohort	3770.55
P09467	3275_DFDPAVTEYIQR_3	22	1.03451E-81	Clinical cohort	3774.29
P09467	4769_EAVLDVIPTDIHQR_2	22	0	Clinical cohort	3348.59
P09467	4770_EAVLDVIPTDIHQR_3	22	0	Clinical cohort	4703.4
P09467	7467_FVMEEGR_2	22	2.5692E-282	Clinical cohort	1830.39
P09467	857_AGIAHLYGIAGSTNVTGDQVK_3	22	0	Clinical cohort	1945.28
P09467	9216_GTGELTQLLNSLC(UniMod:4)TAVK_2	22	0.000148319	Clinical cohort	5711.13
P09467	9217_GTGELTQLLNSLC(UniMod:4)TAVK_3	22	1.16595E-11	Clinical cohort	5706.43
P09668	12460_KGNFVSPVK_2	9	1.12876E-80	Clinical cohort	1579.36
P09668	17079_NGIPYWIVK_2	9	0	Clinical cohort	3033.78
P09668	21932_TGIYSSTSC(UniMod:4)HK_2	9	0	Clinical cohort	5232.13
P09668	21933_TGIYSSTSC(UniMod:4)HK_3	9	1.7786E-291	Clinical cohort	1095.25
P09668	22517_TPDKVNHAVLAVGYGEK_3	9	5.3761E-255	Clinical cohort	2381.46
P09668	24790_VNHAVLAVGYGEK_2	9	1.6757E-189	Clinical cohort	2292.06
P09668	24791_VNHAVLAVGYGEK_3	9	0	Clinical cohort	3687.9
P09668	8375_GIMGEDTYPYQGK_2	9	0	Clinical cohort	3685.43
P09668	8376_GIM(UniMod:35)GEDTYPYQGK_2	9	3.183E-116	Clinical cohort	2148.06
P09871	18263_QFGPYC(UniMod:4)GHGFPGPLNIETK_3	4	2.29199E-22	Clinical cohort	4143.83
P09871	21012_SSNNPHSPIVEEFQVPYNK_3	4	1.555E-215	Clinical cohort	3597.42
P09871	22457_TNFDNDIALVR_2	4	3.7757E-242	Clinical cohort	3436.29
P09871	4876_EDTPNSVWEPAK_2	4	6.65444E-12	Clinical cohort	2471.3
P10412	189850_SETAPAAPAAPAPAEK_2	1	1.1247E-29	Clinical cohort	1801.26
P10619	20625_SMNSQYLK_2	6	6.438E-201	Clinical cohort	1774.08
P10619	26361_YGDSGEQIAGFVK_2	6	2.4919E-195	Clinical cohort	3124.45
P10619	2850_C(UniMod:4)NFYDNKDLEC(UniMod:4)VTNLQEVAR_3	6	1.86284E-14	Clinical cohort	4105.88
P10619	3746_DLEC(UniMod:4)VTNLQEVAR_2	6	2.92018E-53	Clinical cohort	3542.41
P10619	5023_EFSHIAFLTIK_3	6	2.37296E-69	Clinical cohort	4230.28
P10619	7615_GAGHMVPTDKPLAAFTMFSR_4	6	2.10447E-32	Clinical cohort	4360.12
P10643	14232_LIDQYGTHYLQSGSLGGEYR_3	12	9.1254E-152	Clinical cohort	3520.38
P10643	15419_LSGNVLSYTFQVK_2	12	8.81755E-85	Clinical cohort	4236.86
P10643	15673_LTPLYELVK_2	12	2.1086E-195	Clinical cohort	4219.16
P10643	17924_NVVYTC(UniMod:4)NEGYSLIGNPVAR_3	12	1.45135E-45	Clinical cohort	3907.89
P10643	19643_SC(UniMod:4)VGETTESTQC(UniMod:4)EDEELEHLR_3	12	4.31465E-91	Clinical cohort	2996.15
P10643	198_AASGTQNNVLR_2	12	4.8725E-183	Clinical cohort	1276.4
P10643	24476_VLFYVDSEK_2	12	7.22391E-09	Clinical cohort	3184.57
P10643	287_AC(UniMod:4)GAC(UniMod:4)PLWGK_2	12	1.5187E-89	Clinical cohort	2468.25
P10643	4162_DSC(UniMod:4)TLPASAEK_2	12	2.9739E-213	Clinical cohort	1496.33
P10643	5602_ELSHLPSLYDYSAYR_3	12	1.10277E-95	Clinical cohort	3989.95
P10643	5917_EQTMSEC(UniMod:4)EAGALR_2	12	2.82488E-93	Clinical cohort	2012.51
P10643	7743_GC(UniMod:4)PTEEGC(UniMod:4)GER_2	12	7.52646E-51	Clinical cohort	865.241
P10768	12168_KAFSGYLGTDQSK_2	10	1.27174E-30	Clinical cohort	2116.1
P10768	12169_KAFSGYLGTDQSK_3	10	1.9618E-226	Clinical cohort	2104.32
P10768	20128_SGYHQSASEHGLVVIAPDTSPR_3	10	1.9051E-145	Clinical cohort	2695.1
P10768	20129_SGYHQSASEHGLVVIAPDTSPR_4	10	3.8605E-139	Clinical cohort	2692.48
P10768	21263_SVSAFAPIC(UniMod:4)NPVLC(UniMod:4)PWGK_2	10	8.0792E-154	Clinical cohort	5125.23
P10768	21264_SVSAFAPIC(UniMod:4)NPVLC(UniMod:4)PWGK_3	10	5.2667E-163	Clinical cohort	5123.28
P10768	23825_VFEHDSVELNC(UniMod:4)K_2	10	6.71509E-65	Clinical cohort	2225.74
P10768	23826_VFEHDSVELNC(UniMod:4)K_3	10	0	Clinical cohort	3379.99
P10768	2573_AYDATHLVK_2	10	4.142E-307	Clinical cohort	1862.85
P10768	742_AFSGYLGTDQSK_2	10	2.8775E-180	Clinical cohort	2451.61
P12724	1961_AQWFAIQHISLNPPR_3	4	1.7677E-104	Clinical cohort	4513.1
P12724	22811_TTFANVVNVC(UniMod:4)GNQSIR_2	4	7.94943E-37	Clinical cohort	3446.5
P12724	26778_YPVVPVHLDTTI_2	4	3.3623E-174	Clinical cohort	4346.92
P12724	7564_FYVVAC(UniMod:4)DNRDPR_3	4	4.16421E-55	Clinical cohort	2248.68
P13798	1295_ALDVSASDDEIAR_2	13	8.0599E-203	Clinical cohort	2527.72
P13798	16335_MGFAVLLVNYR_2	13	1.25299E-33	Clinical cohort	5035.73
P13798	18665_QPALSAAC(UniMod:4)LGPEVTTQYGGQYR_3	13	3.47359E-10	Clinical cohort	3854.53
P13798	18924_QVLLSEPEEAAALYR_2	13	6.95993E-24	Clinical cohort	4064.5
P13798	18988_QYLVFHDGDSVVFAGPAGNSVETR_3	13	1.04614E-07	Clinical cohort	4137.31
P13798	19533_SALYYVDLIGGK_2	13	1.2226E-161	Clinical cohort	4507.03
P13798	19935_SFNLSALEK_2	13	1.4915E-93	Clinical cohort	3561.69
P13798	22563_TPLLLMLGQEDR_2	13	5.53347E-26	Clinical cohort	4797.32
P13798	23961_VGFLPSAGK_2	13	1.1403E-251	Clinical cohort	2651.57
P13798	25397_VTSVVVDVVPR_2	13	9.9661E-281	Clinical cohort	3266.74
P13798	2719_C(UniMod:4)ELLSDDSLAVSSPR_2	13	8.77005E-26	Clinical cohort	3463.61
P13798	627_AESFFQTK_2	13	3.357E-113	Clinical cohort	2432.06
P13798	9141_GSTGFGQDSILSLPGNVGHQDVK_3	13	7.0226E-198	Clinical cohort	4101.17
P15941	40371_EGTINVHDVETQFNQYK_3	1	1.141E-201	Clinical cohort	3728.11
P16233	54409_FLLYTNENPNNFQEVAADSSSISGSNFK_3	1	3.42031E-10	Clinical cohort	4838.75
P17301	10886_IGQTSSSVSFK_2	5	2.68517E-11	Clinical cohort	1950.06
P17301	11214_ILGSDGAFR_2	5	8.97659E-17	Clinical cohort	2430.31
P17301	11492_IPLLYDAEIHLTR_3	5	9.73071E-11	Clinical cohort	4527.59
P17301	22675_TQVGLIQYANNPR_2	5	4.38369E-08	Clinical cohort	2977.48
P17301	811_AGDISC(UniMod:4)NADINPLK_2	5	9.65293E-16	Clinical cohort	2906.05
P20160	18279_QFPFLASIQNQGR_2	5	6.58955E-85	Clinical cohort	4594.06
P20160	19123_RGGIC(UniMod:4)NGDGGTPLVC(UniMod:4)EGLAHGVASFSLGPC(UniMod:4)GR_4	5	4.31932E-51	Clinical cohort	4523.47
P20160	2917_C(UniMod:4)QVAGWGSQR_2	5	5.2394E-105	Clinical cohort	1878.32
P20160	9664_HFC(UniMod:4)GGALIHAR_2	5	3.17778E-31	Clinical cohort	1930.04
P20160	9665_HFC(UniMod:4)GGALIHAR_3	5	0	Clinical cohort	4156.7
P22891	29360_DFC(UniMod:4)GGVIIR_2	1	4.95174E-20	Clinical cohort	3101.38
P23141	12211_KAVEKPPQTEHIEL_2	34	7.01574E-13	Clinical cohort	2396.34
P23141	12212_KAVEKPPQTEHIEL_3	34	8.35528E-32	Clinical cohort	2372.42
P23141	12413_KGDVKPLAEQIAITAGC(UniMod:4)K_2	34	8.16388E-11	Clinical cohort	3137.01
P23141	12414_KGDVKPLAEQIAITAGC(UniMod:4)K_3	34	5.0368E-99	Clinical cohort	3108.54
P23141	12415_KGDVKPLAEQIAITAGC(UniMod:4)K_4	34	3.2367E-206	Clinical cohort	3119.23
P23141	14011_LGIWGFFSTGDEHSR_3	34	8.6003E-124	Clinical cohort	5183.48
P23141	14344_LKDKEVAFWTNLFAK_3	34	1.46678E-47	Clinical cohort	4936.73
P23141	14345_LKDKEVAFWTNLFAK_4	34	1.02485E-40	Clinical cohort	4951.95
P23141	17014_NFHTVPYMVGINK_2	34	5.67758E-87	Clinical cohort	3390.34
P23141	17016_NFHTVPYMVGINK_3	34	2.6218E-247	Clinical cohort	3402.71
P23141	17017_NFHTVPYM(UniMod:35)VGINK_3	34	6.06033E-16	Clinical cohort	2929.62
P23141	18467_QKTEEELLETTLK_3	34	0	Clinical cohort	1093.04
P23141	21358_SYPLVC(UniMod:4)IAK_2	34	1.1564E-219	Clinical cohort	3161.16
P23141	21680_TEEELLETTLK_2	34	9.54777E-21	Clinical cohort	3513.79
P23141	22522_TPEELQAER_2	34	0	Clinical cohort	2299.9
P23141	22886_TTTSAVMVHC(UniMod:4)LR_2	34	1.77435E-82	Clinical cohort	2285.18
P23141	22888_TTTSAVMVHC(UniMod:4)LR_3	34	6.6198E-221	Clinical cohort	2268.44
P23141	22966_TVIGDHGDELFSVFGAPFLK_3	34	1.46106E-15	Clinical cohort	5709.59
P23141	22967_TVIGDHGDELFSVFGAPFLK_4	34	1.29448E-12	Clinical cohort	5481.07
P23141	2369_AVEKPPQTEHIEL_3	34	1.66677E-18	Clinical cohort	2752.38
P23141	26601_YLGGTDDTVK_2	34	0	Clinical cohort	2753.74
P23141	3666_DKEVAFWTNLFAK_3	34	1.2229E-06	Clinical cohort	5304.54
P23141	5210_EGYLQIGANTQAAQK_2	34	1.1086E-150	Clinical cohort	2669.75
P23141	5211_EGYLQIGANTQAAQK_3	34	2.07105E-16	Clinical cohort	2694.67
P23141	5508_ELIPEATEK_2	34	6.62082E-54	Clinical cohort	2252.43
P23141	6027_ESQPLLGTVIDGM(UniMod:35)LLLK_3	34	1.96671E-10	Clinical cohort	5558.94
P23141	6187_EVAFWTNLFAK_2	34	1.0467E-108	Clinical cohort	5576.8
P23141	7018_FLSLDLQGDPR_2	34	3.24985E-42	Clinical cohort	3919.92
P23141	7398_FTPPQPAEPWSFVK_2	34	4.6744E-185	Clinical cohort	4503.41
P23141	7399_FTPPQPAEPWSFVK_3	34	9.2354E-112	Clinical cohort	4511.66
P23141	7505_FWANFAR_2	34	4.2597E-307	Clinical cohort	3450.97
P23141	7862_GDVKPLAEQIAITAGC(UniMod:4)K_3	34	1.22069E-47	Clinical cohort	3515.27
P23141	8788_GNWGHLDQVAALR_2	34	1.0209E-156	Clinical cohort	3402.78
P23141	8789_GNWGHLDQVAALR_3	34	0	Clinical cohort	2255.38
P23946	14799_LMDPQAC(UniMod:4)SHFR_3	5	6.61441E-07	Clinical cohort	2241.41
P23946	17047_NFVLTAAHC(UniMod:4)AGR_3	5	2.64682E-20	Clinical cohort	2521.37
P23946	19501_SAFKGDSGGPLLC(UniMod:4)AGVAQGIVSYGR_3	5	3.82999E-10	Clinical cohort	4189.26
P23946	3273_DFDHNLQLC(UniMod:4)VGNPR_3	5	7.13134E-90	Clinical cohort	3319.47
P23946	6533_FC(UniMod:4)GGFLIR_2	5	3.28983E-61	Clinical cohort	3633.03
P24158	13838_LFPDFFTR_2	5	0	Clinical cohort	1974.68
P24158	15887_LVNVVLGAHNVR_3	5	1.5059E-181	Clinical cohort	2588.82
P24158	23308_VALYVDWIR_2	5	1.1173E-247	Clinical cohort	4636.66
P24158	8763_GNPGSHFC(UniMod:4)GGTLIHPSFVLTAAHC(UniMod:4)LR_4	5	1.9354E-146	Clinical cohort	4186.31
P24158	8764_GNPGSHFC(UniMod:4)GGTLIHPSFVLTAAHC(UniMod:4)LR_5	5	2.4774E-146	Clinical cohort	4208.6
P26927	161760_NPDGDPGGPWC(UniMod:4)YTTDPAVR_3	1	4.60976E-22	Clinical cohort	3259.06
P27487	10170_HSYTASYDIYDLNKR_3	19	2.98286E-25	Clinical cohort	2962.76
P27487	10171_HSYTASYDIYDLNKR_4	19	1.17965E-16	Clinical cohort	2942.79
P27487	11356_IMHAINR_2	19	3.99935E-13	Clinical cohort	1188.05
P27487	11583_IQLSDYTK_2	19	1.0466E-52	Clinical cohort	2499.66
P27487	13116_KYPLLLDVYAGPC(UniMod:4)SQK_3	19	2.78507E-25	Clinical cohort	4211.35
P27487	13397_LAYVWNNDIYVK_2	19	6.79116E-65	Clinical cohort	4166.01
P27487	14090_LGTFEVEDQIEAAR_2	19	5.5501E-106	Clinical cohort	3721.47
P27487	18378_QHIEMSTTGWVGR_3	19	1.98331E-27	Clinical cohort	2933.32
P27487	19239_RLGTFEVEDQIEAAR_3	19	2.2479E-30	Clinical cohort	3465.35
P27487	23157_TYTLTDYLK_2	19	4.58091E-48	Clinical cohort	3800.29
P27487	24437_VLEDNSALDK_2	19	2.4587E-151	Clinical cohort	1723.99
P27487	25270_VTC(UniMod:4)LSC(UniMod:4)ELNPER_2	19	7.64639E-83	Clinical cohort	2733.33
P27487	25878_WEYYDSVYTER_2	19	1.20276E-29	Clinical cohort	3394.04
P27487	26685_YMGLPTPEDNLDHYR_3	19	2.4729E-38	Clinical cohort	3712.32
P27487	2747_C(UniMod:4)GIAVAPVSR_2	19	1.18418E-19	Clinical cohort	2123.33
P27487	2922_C(UniMod:4)QYYSVSFSK_2	19	5.7853E-13	Clinical cohort	2906.25
P27487	7239_FRPSEPHFTLDGNSFYK_3	19	1.93457E-22	Clinical cohort	3722.87
P27487	7240_FRPSEPHFTLDGNSFYK_4	19	2.82904E-20	Clinical cohort	3709.85
P27487	797_AGAVNPTVK_2	19	2.1489E-122	Clinical cohort	1112.45
P28065	25104_VSAGEAVVNR_2	4	0	Clinical cohort	3280.56
P28065	3446_DGSSGGVIYLVTITAAGVDHR_3	4	1.60466E-83	Clinical cohort	5342.76
P28065	5107_EGGQVYGTLGGMLTR_2	4	5.1878E-240	Clinical cohort	3942.96
P28065	7409_FTTDAIALAMSR_2	4	9.3427E-168	Clinical cohort	4098.9
P28072	13141_LAAIAESGVER_2	3	0	Clinical cohort	1507.06
P28072	18921_QVLLGDQIPK_2	3	6.3475E-273	Clinical cohort	3050.16
P28072	22884_TTTGSYIANR_2	3	0	Clinical cohort	1671.44
P29144	11460_IPASWTNPSGK_2	15	6.31965E-36	Clinical cohort	2411.9
P29144	1340_ALENTAVK_2	15	1.29399E-95	Clinical cohort	1156.16
P29144	14348_LKDLPFIVSHR_3	15	1.25666E-63	Clinical cohort	3156.08
P29144	15535_LSTMETGTGLIR_2	15	5.13178E-22	Clinical cohort	3024.82
P29144	1693_ANNIDYTVHSVR_3	15	7.16607E-52	Clinical cohort	2059.72
P29144	23287_VALAEAC(UniMod:4)R_2	15	3.4995E-120	Clinical cohort	1526.36
P29144	24927_VPITAVIAAK_2	15	1.5687E-150	Clinical cohort	3030.74
P29144	26234_YEDLAPC(UniMod:4)ITLK_2	15	2.77063E-82	Clinical cohort	3680.14
P29144	295_AC(UniMod:4)IDSNEDGDLSK_2	15	7.52108E-33	Clinical cohort	1661.17
P29144	3361_DGEIVGLSGR_2	15	4.6851E-112	Clinical cohort	2369.26
P29144	5139_EGLHYTEVC(UniMod:4)GYDIASPNAGPLFR_3	15	1.10366E-52	Clinical cohort	4511.29
P29144	6548_FC(UniMod:4)SLPEK_2	15	3.24192E-62	Clinical cohort	1831.01
P29144	6618_FDVQSSLK_2	15	5.13407E-44	Clinical cohort	2462.67
P29144	8868_GPSADGALGVSISAPGGAIASVPNWTLR_3	15	2.36369E-14	Clinical cohort	5258.08
P29144	9243_GTLTEAFPVLGGK_2	15	6.7813E-54	Clinical cohort	4273.05
P36776	11159_ILC(UniMod:4)FYGPPGVGK_2	7	1.23574E-70	Clinical cohort	3757.4
P36776	11188_ILEFIAVSQLR_2	7	4.9494E-150	Clinical cohort	4774.93
P36776	13330_LAQPYVGVFLK_2	7	8.2395E-89	Clinical cohort	4262.56
P36776	15512_LSSDVLTLLIK_2	7	4.2841E-111	Clinical cohort	5235.67
P36776	26882_YSNENLDLAR_2	7	2.7657E-145	Clinical cohort	2286.71
P36776	3560_DIIALNPLYR_2	7	4.7609E-118	Clinical cohort	4337.47
P36776	4592_EAEDELSAR_2	7	4.80857E-25	Clinical cohort	1361.87
P38571	3771_DLFGDKEFLPQSAFLK_3	2	4.8206E-264	Clinical cohort	5144.63
P38571	7160_FQAFDWGSSAK_2	2	4.121E-234	Clinical cohort	3646.07
P42785	16813_NALDPMSVLLAR_2	3	3.66462E-21	Clinical cohort	5096.72
P42785	21301_SWDAINR_2	3	2.76812E-91	Clinical cohort	2113.05
P42785	25478_VVC(UniMod:4)QYLK_2	3	1.3175E-58	Clinical cohort	1950.48
P43034	112861_LLASC(UniMod:4)SADMTIK_2	18	3.25902E-69	Clinical cohort	2732.07
P43034	116351_LNEAKEEFTSGGPLGQK_3	18	0	Clinical cohort	3058.95
P43034	125325_LWDFQGFEC(UniMod:4)IR_2	18	0	Clinical cohort	1679.38
P43034	131518_MVRPNQDGTLIASC(UniMod:4)SNDQTVR_3	18	6.0516E-106	Clinical cohort	2492.54
P43034	131687_MWEVQTGYC(UniMod:4)VK_2	18	5.5283E-44	Clinical cohort	3353.36
P43034	165121_SGKPGPFLLSGSR_3	18	0	Clinical cohort	3078.65
P43034	177683_TAPYVVTGSVDQTVK_2	18	1.0274E-170	Clinical cohort	2775.15
P43034	183575_TLNAHEHFVTSLDFHK_4	18	1.66297E-36	Clinical cohort	3021.78
P43034	184410_TMHGHDHNVSSVAIMPNGDHIVSASR_4	18	1.56398E-06	Clinical cohort	2521.31
P43034	196463_VIFHPVFSVMVSASEDATIK_3	18	9.47202E-20	Clinical cohort	5066.97
P43034	200103_VMELESK_2	18	6.157E-210	Clinical cohort	1589.01
P43034	206727_VWDYETGDFER_2	18	7.6411E-282	Clinical cohort	3330.38
P43034	206838_VWVVATK_2	18	0	Clinical cohort	4170.95
P43034	35846_EAELDVNEELDKK_3	18	6.79112E-10	Clinical cohort	2508.03
P43034	38241_EEFTSGGPLGQK_2	18	1.0665E-179	Clinical cohort	2375.05
P43034	53425_FILSC(UniMod:4)ADDK_2	18	0	Clinical cohort	1973.13
P43034	63689_GHTDSVQDISFDHSGK_3	18	1.926E-207	Clinical cohort	2069.73
P43034	63690_GHTDSVQDISFDHSGK_4	18	8.946E-117	Clinical cohort	2087.86
P47712	198529_VLGVSGSQSR_2	3	1.22894E-21	Clinical cohort	1451.26
P47712	81927_IDPYVFDR_2	3	8.46551E-14	Clinical cohort	3209.73
P47712	81928_IDPYVFDREGLK_3	3	1.46633E-57	Clinical cohort	3328.7
P48147	15000_LPEADDIQYPSMLLLTADHDDR_3	13	1.68745E-30	Clinical cohort	5109.08
P48147	16027_LWYC(UniMod:4)DLQQESSGIAGILK_3	13	8.06291E-32	Clinical cohort	5452.43
P48147	17205_NILQLHDLTTGALLK_3	13	9.6959E-59	Clinical cohort	4648.02
P48147	18629_QNC(UniMod:4)FDDFQC(UniMod:4)AAEYLIK_3	13	1.90475E-21	Clinical cohort	5352.67
P48147	19678_SDGTETSTNLHQK_3	13	1.53806E-12	Clinical cohort	854.229
P48147	23858_VFLDPNILSDDGTVALR_2	13	2.43681E-38	Clinical cohort	5064.03
P48147	23859_VFLDPNILSDDGTVALR_3	13	7.68788E-60	Clinical cohort	5079.59
P48147	24675_VLVPEHEKDVLEWIAC(UniMod:4)VR_3	13	9.31479E-54	Clinical cohort	5077.98
P48147	24697_VLYVQDSLEGEAR_2	13	4.52207E-31	Clinical cohort	3189.11
P48147	26344_YFYFYNTGLQNQR_2	13	3.3517E-22	Clinical cohort	4075.9
P48147	26886_YSPLHNVK_2	13	1.43819E-34	Clinical cohort	1499.08
P48147	6851_FIATLQYIVGR_2	13	4.096E-154	Clinical cohort	4618.13
P48147	9964_HMGGILAVANIR_3	13	8.3872E-101	Clinical cohort	3621.9
P48740	32686_DSDLLSPSDFK_2	1	1.80212E-10	Clinical cohort	3671.18
P49327	1109_AINC(UniMod:4)ATSGVVGLVNC(UniMod:4)LR_2	80	3.2212E-123	Clinical cohort	4632.45
P49327	1110_AINC(UniMod:4)ATSGVVGLVNC(UniMod:4)LR_3	80	3.69984E-88	Clinical cohort	4640.3
P49327	11480_IPGLLSPHPLLQLSYTATDR_3	80	6.00673E-34	Clinical cohort	4974.51
P49327	133_AALQEELQLC(UniMod:4)K_2	80	7.5352E-155	Clinical cohort	3141.31
P49327	13776_LFDHPESPTPNPTEPLFLAQAEVYK_3	80	5.4405E-193	Clinical cohort	4984.47
P49327	14041_LGMLSPEGTC(UniMod:4)K_2	80	2.9607E-197	Clinical cohort	2446.6
P49327	14042_LGM(UniMod:35)LSPEGTC(UniMod:4)K_2	80	7.51095E-22	Clinical cohort	1824.34
P49327	14172_LHLSGIDANPNALFPPVEFPAPR_3	80	1.77475E-79	Clinical cohort	5326.8
P49327	14949_LNSVQSSERPLFLVHPIEGSTTVFHSLASR_4	80	5.71606E-38	Clinical cohort	4683.5
P49327	14950_LNSVQSSERPLFLVHPIEGSTTVFHSLASR_5	80	5.49382E-32	Clinical cohort	4650.92
P49327	15227_LQLNGNLQLELAQVLAQERPK_3	80	1.11223E-30	Clinical cohort	5565.07
P49327	15309_LQVVDQPLPVR_2	80	0	Clinical cohort	3413
P49327	15439_LSIPTYGLQC(UniMod:4)TR_2	80	2.7478E-44	Clinical cohort	3626.46
P49327	15482_LSPDAIPGK_2	80	3.055E-204	Clinical cohort	1951.08
P49327	16734_MVVPGLDGAQIPR_2	80	2.70295E-47	Clinical cohort	3895.82
P49327	16735_M(UniMod:35)VVPGLDGAQIPR_2	80	1.83562E-73	Clinical cohort	3364.25
P49327	19134_RGLKPSC(UniMod:4)TIIPLMK_3	80	1.73195E-07	Clinical cohort	3340.44
P49327	19345_RPTPQDSPIFLPVDDTSFR_3	80	4.1433E-241	Clinical cohort	4426.54
P49327	19373_RQQEQQVPILEK_2	80	5.83572E-08	Clinical cohort	2242.98
P49327	19374_RQQEQQVPILEK_3	80	1.3381E-103	Clinical cohort	2281.99
P49327	19451_RVYATILNAGTNTDGFK_3	80	2.53668E-69	Clinical cohort	3372.46
P49327	1951_AQVADVVVSR_2	80	0	Clinical cohort	4787.94
P49327	19659_SDEAVKPFGLK_2	80	5.6493E-123	Clinical cohort	2473.35
P49327	19811_SEGVVAVLLTK_2	80	1.9971E-292	Clinical cohort	4041.43
P49327	19957_SFYGSTLFLC(UniMod:4)R_2	80	1.4223E-135	Clinical cohort	4380.87
P49327	20592_SLYQSAGVAPESFEYIEAHGTGTK_3	80	8.3192E-117	Clinical cohort	4081.91
P49327	20695_SNMGHPEPASGLAALAK_2	80	7.96735E-14	Clinical cohort	2893.64
P49327	20696_SNMGHPEPASGLAALAK_3	80	1.38425E-28	Clinical cohort	2913.47
P49327	21917_TGGAYGEDLGADYNLSQVC(UniMod:4)DGK_3	80	1.1313E-40	Clinical cohort	3571.16
P49327	21988_TGTVSLEVR_2	80	1.4854E-270	Clinical cohort	2142.97
P49327	23166_VAAAVDLIIK_2	80	2.8984E-111	Clinical cohort	3722.71
P49327	23901_VFTTVGSAEK_2	80	3.21528E-69	Clinical cohort	1808.01
P49327	23933_VGDPQELNGITR_2	80	8.2096E-151	Clinical cohort	2434.33
P49327	24434_VLEALLPLK_2	80	0	Clinical cohort	1485.27
P49327	24551_VLLSLEHGLWAPNLHFHSPNPEIPALLDGR_4	80	1.18997E-27	Clinical cohort	5551.26
P49327	24552_VLLSLEHGLWAPNLHFHSPNPEIPALLDGR_5	80	5.13608E-63	Clinical cohort	5551.24
P49327	24599_VLQGDLVMNVYR_2	80	7.6539E-182	Clinical cohort	3777.62
P49327	25097_VRPGETLLIHSGSGGVGQAAIAIALSLGC(UniMod:4)R_4	80	4.1614E-22	Clinical cohort	5632.8
P49327	25224_VSVHVIEGDHR_2	80	1.30315E-23	Clinical cohort	1676.8
P49327	25225_VSVHVIEGDHR_3	80	1.52811E-32	Clinical cohort	1692.13
P49327	25251_VTAIHIDPATHR_3	80	1.07231E-75	Clinical cohort	1944.1
P49327	25410_VTVAGGVHISGLHTESAPR_4	80	7.54956E-48	Clinical cohort	2744.22
P49327	25520_VVEVLAGHGHLYSR_3	80	2.84445E-58	Clinical cohort	2430.33
P49327	25701_VVVQVLAEEPEAVLK_2	80	1.765E-218	Clinical cohort	4427.2
P49327	25702_VVVQVLAEEPEAVLK_3	80	3.4945E-166	Clinical cohort	4422.5
P49327	25787_VYQWDDPDPR_2	80	1.49468E-12	Clinical cohort	2662.85
P49327	25967_WLSTSIPEAQWHSSLAR_3	80	8.3979E-110	Clinical cohort	4002.49
P49327	26871_YSGTLNLDR_2	80	2.3118E-208	Clinical cohort	2272.37
P49327	2973_C(UniMod:4)TVFHGAQVEDAFR_3	80	4.17463E-86	Clinical cohort	3215.22
P49327	298_AC(UniMod:4)LDTAVENMPSLK_2	80	1.4485E-185	Clinical cohort	3626.82
P49327	2987_C(UniMod:4)VLLSNLSSTSHVPEVDPGSAELQK_3	80	1.28898E-65	Clinical cohort	4051.41
P49327	3412_DGLLENQTPEFFQDVC(UniMod:4)KPK_3	80	2.84098E-24	Clinical cohort	4368.53
P49327	349_ADEASELAC(UniMod:4)PTPK_2	80	1.5857E-127	Clinical cohort	1991.49
P49327	3991_DNLEFFLAGIGR_2	80	1.0848E-153	Clinical cohort	5462.65
P49327	4074_DPSQQELPR_2	80	1.1777E-193	Clinical cohort	1601.62
P49327	4295_DTSFEQHVLWHTGGK_3	80	2.82411E-75	Clinical cohort	3087
P49327	4825_EDGLAQQQTQLNLR_2	80	1.59422E-92	Clinical cohort	2756.01
P49327	5543_ELNLVLSVR_2	80	3.7055E-136	Clinical cohort	3887.38
P49327	6345_EVWALVQAGIR_2	80	1.3031E-145	Clinical cohort	4383.67
P49327	6532_FC(UniMod:4)FTPHTEEGC(UniMod:4)LSER_3	80	2.9556E-163	Clinical cohort	3032.29
P49327	6556_FDASFFGVHPK_2	80	9.68451E-58	Clinical cohort	3726.17
P49327	6557_FDASFFGVHPK_3	80	1.6451E-210	Clinical cohort	3712.86
P49327	6589_FDLSQNHPLGMAIFLK_3	80	1.28691E-17	Clinical cohort	5087.43
P49327	678_AFDTAGNGYC(UniMod:4)R_2	80	2.3173E-149	Clinical cohort	1793.32
P49327	71_AAEQYTPK_2	80	7.4422E-115	Clinical cohort	1057.43
P49327	7152_FPQLDSTSFANSR_2	80	3.9106E-122	Clinical cohort	3472.95
P49327	8197_GGNVGINSFGFGGSNVHIILRPNTQPPPAPAPHATLPR_5	80	4.43164E-35	Clinical cohort	4320.12
P49327	8358_GILADEDSSRPVWLK_2	80	5.05191E-05	Clinical cohort	3721.97
P49327	8359_GILADEDSSRPVWLK_3	80	5.53884E-69	Clinical cohort	3696.9
P49327	8574_GLKPSC(UniMod:4)TIIPLMK_3	80	1.46585E-84	Clinical cohort	3746.49
P49327	8652_GLVQALQTK_2	80	1.5249E-207	Clinical cohort	2603.55
P49327	8686_GMGLSLMR_2	80	1.83993E-71	Clinical cohort	3213.83
P49327	8722_GNAGQSNYGFANSAMER_2	80	1.3392E-76	Clinical cohort	2604.07
P49327	901_AGLYGLPR_2	80	3.9468E-251	Clinical cohort	2760.54
P49327	9253_GTPLISPLIK_2	80	0	Clinical cohort	2125.62
P49327	9332_GVDLVLNSLAEEK_2	80	1.8629E-147	Clinical cohort	4169.14
P49327	9484_GYAVLGGER_2	80	9.0978E-237	Clinical cohort	2117.9
P49327	9494_GYDYGPHFQGILEASLEGDSGR_3	80	7.85067E-57	Clinical cohort	4703.46
P49327	9680_HFLLEEDKPEEPTAHAFVSTLTR_4	80	4.10712E-77	Clinical cohort	3996.68
P49327	9749_HGLYLPTR_2	80	5.38592E-85	Clinical cohort	2126.88
P50897	15263_LQQGYNAMGFSQGGQFLR_3	7	4.3807E-146	Clinical cohort	4058.81
P50897	15909_LVQAEYWHDPIKEDVYR_3	7	7.64125E-59	Clinical cohort	3542.46
P50897	15910_LVQAEYWHDPIKEDVYR_4	7	2.9152E-150	Clinical cohort	3546.12
P50897	22316_TLNAGAYSK_2	7	1.9809E-186	Clinical cohort	1432.24
P50897	2900_C(UniMod:4)PSPPMINLISVGGQHQGVFGLPR_3	7	1.73069E-13	Clinical cohort	5243.97
P50897	6112_ETIPLQETSLYTQDR_2	7	2.1782E-169	Clinical cohort	3532.46
P50897	6113_ETIPLQETSLYTQDR_3	7	8.6208E-131	Clinical cohort	3525.22
P52732	57011_ETTIDGEELVK_2	2	1.8607E-09	Clinical cohort	2636.53
P52732	59181_EYTEEIER_2	2	8.03539E-07	Clinical cohort	1748.29
P52948	7554_AGVSTNISTK_2	1	4.88663E-41	Clinical cohort	1419.89
P54577	10011_HPDADSLYVEK_3	15	7.33864E-12	Clinical cohort	2043.54
P54577	10249_HVLFPLK_2	15	2.26034E-43	Clinical cohort	2904.67
P54577	10572_IDVGEAEPR_2	15	5.2252E-290	Clinical cohort	1837.13
P54577	11657_ISEEC(UniMod:4)IAQWK_2	15	3.51017E-93	Clinical cohort	3047.79
P54577	13334_LASAAYPDPSK_2	15	6.2323E-131	Clinical cohort	1802.39
P54577	1623_AMLESIGVPLEK_2	15	4.44618E-64	Clinical cohort	3943.2
P54577	17372_NLQEVLGEEK_2	15	1.2929E-110	Clinical cohort	2804.01
P54577	17735_NSVEVALNK_2	15	4.2347E-119	Clinical cohort	1901.8
P54577	1829_APWELLELR_2	15	1.1135E-104	Clinical cohort	4958.63
P54577	18893_QVEPLDPPAGSAPGEHVFVK_3	15	1.408E-10	Clinical cohort	3356.11
P54577	23049_TVVSGLVQFVPK_2	15	7.7018E-190	Clinical cohort	4536.19
P54577	23050_TVVSGLVQFVPKEELQDR_3	15	1.034E-101	Clinical cohort	4484.21
P54577	23152_TYTAYVDLEKDFAAEVVHPGDLK_4	15	2.69622E-30	Clinical cohort	5150.67
P54577	23469_VDAQFGGIDQR_2	15	2.5176E-186	Clinical cohort	2378.21
P54577	26640_YLPALGYSK_2	15	3.10938E-17	Clinical cohort	2966.21
P60900	1118_AINQGGLTSVAVR_2	12	0	Clinical cohort	1490.41
P60900	11302_ILTEAEIDAHLVALAERD_3	12	1.8243E-215	Clinical cohort	4919.38
P60900	11817_ITENIGC(UniMod:4)VMTGMTADSR_2	12	1.67011E-30	Clinical cohort	3751.23
P60900	11818_ITENIGC(UniMod:4)VMTGMTADSR_3	12	5.1906E-43	Clinical cohort	3772.11
P60900	14487_LLDSSTVTHLFK_2	12	4.1863E-119	Clinical cohort	3948.35
P60900	14488_LLDSSTVTHLFK_3	12	0	Clinical cohort	2536.17
P60900	16117_LYQVEYAFK_2	12	0	Clinical cohort	5062.19
P60900	18823_QTESTSFLEK_2	12	9.2242E-290	Clinical cohort	2141.49
P60900	26435_YGYEIPVDMLC(UniMod:4)K_2	12	3.991E-196	Clinical cohort	4398.43
P60900	3152_DC(UniMod:4)AVIVTQK_2	12	1.2671E-73	Clinical cohort	1664.37
P60900	8448_GKDC(UniMod:4)AVIVTQK_2	12	1.0844E-106	Clinical cohort	1388.42
P60900	9860_HITIFSPEGR_2	12	4.3307E-190	Clinical cohort	2566.46
P60953	17831_NVFDEAILAALEPPEPK_2	10	6.94265E-15	Clinical cohort	5710.64
P60953	17832_NVFDEAILAALEPPEPK_3	10	4.90359E-06	Clinical cohort	5709.61
P60953	18462_QKPITPETAEK_2	10	2.1518E-295	Clinical cohort	1163.43
P60953	21560_TC(UniMod:4)LLISYTTNK_2	10	0	Clinical cohort	2647.27
P60953	22545_TPFLLVGTQIDLR_2	10	0	Clinical cohort	2317.9
P60953	22546_TPFLLVGTQIDLR_3	10	3.1162E-189	Clinical cohort	5103.69
P60953	22547_TPFLLVGTQIDLRDDPSTIEK_3	10	9.39488E-76	Clinical cohort	4837.02
P60953	26063_WVPEITHHC(UniMod:4)PK_2	10	6.8916E-122	Clinical cohort	2046.7
P60953	26064_WVPEITHHC(UniMod:4)PK_3	10	1.4435E-227	Clinical cohort	2083.57
P60953	26998_YVEC(UniMod:4)SALTQK_2	10	0	Clinical cohort	2562.97
P67812	226185_VGEIVVFR_2	1	4.30149E-51	Clinical cohort	3310.87
P68402	11077_IIVLGLLPR_2	3	0	Clinical cohort	3246.16
P68402	5475_ELFSPLHALNFGIGGDTTR_3	3	3.021E-281	Clinical cohort	5218.15
P68402	7932_GEKPNPLR_2	3	7.882E-169	Clinical cohort	970.037
P83111	124640_LVNTPYVDNSYK_2	3	2.12442E-44	Clinical cohort	2508.19
P83111	169480_SLTMVALAK_2	3	4.0042E-91	Clinical cohort	2804.87
P83111	51849_FENSIESLR_2	3	1.5119E-19	Clinical cohort	2579.95
P98073	15981_ASIWETNPGTIR_2	1	4.49142E-82	Clinical cohort	3140.65
Q04756	202366_VQLSPDLLATLPEPASPGR_3	1	5.27157E-21	Clinical cohort	4353.72
Q12805	11541_IQC(UniMod:4)AAGYEQSEHNVC(UniMod:4)QDIDEC(UniMod:4)TAGTHNC(UniMod:4)R_4	11	4.3614E-159	Clinical cohort	2920.33
Q12805	14852_LNC(UniMod:4)EDIDEC(UniMod:4)R_2	11	1.6515E-178	Clinical cohort	1881.93
Q12805	17525_NPC(UniMod:4)QDPYILTPENR_2	11	1.8011E-172	Clinical cohort	2993.85
Q12805	20059_SGNENGEFYLR_2	11	2.52616E-24	Clinical cohort	2744.89
Q12805	2980_C(UniMod:4)VC(UniMod:4)PVSNAMC(UniMod:4)R_2	11	1.6116E-237	Clinical cohort	2044.71
Q12805	2988_C(UniMod:4)VNHYGGYLC(UniMod:4)LPK_3	11	2.95553E-32	Clinical cohort	3222.18
Q12805	3539_DIDEC(UniMod:4)DIVPDAC(UniMod:4)K_2	11	5.0812E-150	Clinical cohort	2997.85
Q12805	452_ADQVC(UniMod:4)INLR_2	11	0	Clinical cohort	2056.51
Q12805	7252_FSC(UniMod:4)MC(UniMod:4)PQGYQVVR_2	11	0	Clinical cohort	4281.95
Q12805	7253_FSC(UniMod:4)M(UniMod:35)C(UniMod:4)PQGYQVVR_2	11	7.37771E-08	Clinical cohort	2570.14
Q12805	9066_GSFAC(UniMod:4)QC(UniMod:4)PPGYQK_2	11	6.4801E-285	Clinical cohort	1986.42
Q12884	13398_LAYVYQNNIYLK_2	3	5.95513E-08	Clinical cohort	3621.96
Q12884	14780_LLYAVYR_2	3	6.9491E-155	Clinical cohort	2715.83
Q12884	22129_TINIPYPK_2	3	6.80911E-13	Clinical cohort	3074.08
Q14118	120215_LREQQLVGEK_3	4	8.93932E-48	Clinical cohort	1694.52
Q14118	17562_ATSITVTGSGSC(UniMod:4)R_2	4	5.7993E-258	Clinical cohort	1565.18
Q14118	204577_VTIPTDLIASSGDIIK_2	4	2.97319E-08	Clinical cohort	5078.42
Q14118	57673_FVGDPALVLNDIHKK_3	4	3.61662E-46	Clinical cohort	3635.03
Q14520	239213_VVLGDQDLK_2	2	1.20121E-16	Clinical cohort	2263.72
Q14520	67252_FTC(UniMod:4)AC(UniMod:4)PDQFK_2	2	8.15045E-07	Clinical cohort	2294.89
Q15102	1176_AIVQLVNER_2	3	6.7086E-103	Clinical cohort	2659.94
Q15102	13695_LENGELEHIRPK_3	3	3.20967E-34	Clinical cohort	2002.03
Q15102	25695_VVVLGLLPR_2	3	1.0202E-114	Clinical cohort	4153.85
Q16740	175628_QSLQVIESAMER_2	2	1.1477E-33	Clinical cohort	3625.37
Q16740	22249_AYDIYSR_2	2	1.1718E-47	Clinical cohort	1956.15
Q2T9J0	107506_LFGDEAAEQWR_2	1	6.00673E-48	Clinical cohort	3370.14
Q2TAA2	20650_SMVQYLK_2	3	1.65252E-23	Clinical cohort	2648.86
Q2TAA2	24239_VILITPTPLC(UniMod:4)ETAWEEQC(UniMod:4)IIQGC(UniMod:4)K_3	3	0.000140535	Clinical cohort	5442.69
Q2TAA2	4329_DVAEAKPELSLLGDGDH_3	3	9.80485E-23	Clinical cohort	3511.97
Q5VWZ2	10122_HSASLIFLHGSGDSGQGLR_4	5	2.63175E-09	Clinical cohort	3024.03
Q5VWZ2	11089_IIYPTAPPR_2	5	7.90854E-43	Clinical cohort	2493.05
Q5VWZ2	17152_NHQDVAGVFALSSFLNK_3	5	8.15663E-20	Clinical cohort	5134.34
Q5VWZ2	2012_ASAVYQALQK_2	5	1.37975E-11	Clinical cohort	2221.37
Q5VWZ2	8178_GGISNVWFDR_2	5	1.68067E-15	Clinical cohort	3833.53
Q6GMR7	18124_AVEESLR_2	2	1.47081E-98	Clinical cohort	1830.61
Q6GMR7	18125_AVEESLRK_2	2	6.37357E-48	Clinical cohort	1537.09
Q6PIU2	12001_IVQELPQLLDAR_2	6	2.98974E-41	Clinical cohort	4201.41
Q6PIU2	17952_NYKPVVQTTGNAR_3	6	3.83095E-26	Clinical cohort	1493.99
Q6PIU2	23824_VFEGPPKPEEPLKR_4	6	1.27586E-13	Clinical cohort	2259.33
Q6PIU2	25280_VTDTDFDGVEVR_2	6	9.27476E-41	Clinical cohort	2856.69
Q6PIU2	25763_VYFPEQIHDVVR_3	6	2.6355E-09	Clinical cohort	3579.78
Q6PIU2	26328_YFLKPEVLQK_3	6	7.54278E-64	Clinical cohort	3081.89
Q6V1X1	84158_IGTVGIASYDYHQGSGTFLFQAGSGIYHVK_4	1	2.73587E-12	Clinical cohort	4838.59
Q6YHK3	1513_ALSEFAALMNTER_2	2	0.000203571	Clinical cohort	4459.98
Q6YHK3	379_ADGNQLTLEER_2	2	3.26219E-34	Clinical cohort	2043.13
Q86TI2	13195_LAEFQTDSQGK_2	4	5.20593E-86	Clinical cohort	1800.35
Q86TI2	16000_LVYFQGTK_2	4	1.12963E-32	Clinical cohort	2481.93
Q86TI2	26368_YGFIDLSR_2	4	2.58403E-34	Clinical cohort	3686.26
Q86TI2	880_AGKPYQLQIYPNER_3	4	4.70523E-98	Clinical cohort	2924.85
Q86TX2	216_AATLILEPAGR_2	1	8.9818E-182	Clinical cohort	2930.43
Q86VB7	10287_HYC(UniMod:4)NHNEDAGVTC(UniMod:4)SDGSDLELR_4	22	9.7225E-70	Clinical cohort	2271.15
Q86VB7	11425_INPASLDK_2	22	2.1433E-206	Clinical cohort	1809.02
Q86VB7	12067_IWMDHVSC(UniMod:4)R_3	22	6.16752E-07	Clinical cohort	2282.73
Q86VB7	13346_LASPSEETWITC(UniMod:4)DNK_2	22	2.68399E-61	Clinical cohort	3185.82
Q86VB7	13749_LEVFYNGAWGTVGK_2	22	7.23646E-43	Clinical cohort	4223.87
Q86VB7	15166_LQEGPTSC(UniMod:4)SGR_2	22	1.0405E-190	Clinical cohort	1091.44
Q86VB7	15764_LVDGVTEC(UniMod:4)SGR_2	22	0	Clinical cohort	3733.4
Q86VB7	15803_LVGGDIPC(UniMod:4)SGR_2	22	3.2584E-294	Clinical cohort	2026.94
Q86VB7	17934_NWQWGGLTC(UniMod:4)DHYEEAK_3	22	9.23043E-14	Clinical cohort	3641.89
Q86VB7	18529_QLGC(UniMod:4)GSALK_2	22	1.49447E-92	Clinical cohort	1550.16
Q86VB7	18530_QLGC(UniMod:4)PTAVTAIGR_2	22	1.02153E-91	Clinical cohort	2848.22
Q86VB7	21008_SSMSETTVGVVC(UniMod:4)R_2	22	6.85449E-78	Clinical cohort	2362.9
Q86VB7	22268_TLGAWGSLC(UniMod:4)NSHWDIEDAHVLC(UniMod:4)QQLK_4	22	3.47266E-12	Clinical cohort	4919.72
Q86VB7	25912_WGTVC(UniMod:4)DDNFNIDHASVIC(UniMod:4)R_3	22	4.13811E-35	Clinical cohort	3872.22
Q86VB7	2656_C(UniMod:4)AGTVEVEIQR_2	22	2.25179E-36	Clinical cohort	2277.85
Q86VB7	2758_C(UniMod:4)GVALSTPGGAR_2	22	2.34802E-52	Clinical cohort	2014.98
Q86VB7	4388_DVGVVC(UniMod:4)SR_2	22	3.3338E-189	Clinical cohort	1400.06
Q86VB7	4594_EAEFGQGTGPIWLNEVK_2	22	1.04737E-34	Clinical cohort	4525.05
Q86VB7	8807_GPDTLWQC(UniMod:4)PSSPWEK_2	22	5.53651E-36	Clinical cohort	4053.75
Q86VB7	9716_HGDTWGSIC(UniMod:4)DSDFSLEAASVLC(UniMod:4)R_3	22	2.50773E-41	Clinical cohort	5102.81
Q86VB7	9871_HKEDAGVIC(UniMod:4)SEFMSLR_3	22	1.49278E-49	Clinical cohort	3721.45
Q86VB7	9974_HNC(UniMod:4)DHAEDAGVIC(UniMod:4)SK_3	22	3.12941E-38	Clinical cohort	1313.8
Q86WA6	12827_KPLEALYGYDYFAR_3	1	1.51004E-91	Clinical cohort	4238.32
Q8IV08	10446_IAVSKPSGPQPQADLQALLQSGAQVR_3	8	1.5411E-145	Clinical cohort	4616.49
Q8IV08	10447_IAVSKPSGPQPQADLQALLQSGAQVR_4	8	5.99871E-67	Clinical cohort	4609.87
Q8IV08	13881_LFVVPADEAQAR_2	8	0	Clinical cohort	2600.82
Q8IV08	1435_ALLNVVDNAR_2	8	3.1878E-271	Clinical cohort	3022.63
Q8IV08	14604_LLISC(UniMod:4)WGHSEPSMR_3	8	3.03649E-66	Clinical cohort	3519.55
Q8IV08	15622_LTHGVLHTK_2	8	1.52552E-16	Clinical cohort	1015.71
Q8IV08	20870_SQLEAIFLR_2	8	0	Clinical cohort	3927.02
Q8IV08	724_AFLLSLAALR_2	8	2.4475E-110	Clinical cohort	5182.52
Q8IY17	108328_LGASALDSIQEFR_2	2	2.03985E-12	Clinical cohort	3969.98
Q8IY17	199654_VLTGNTIALVLGGGGAR_3	2	7.48671E-58	Clinical cohort	4489.36
Q8N2K0	85273_GWGDSVGTPSER_2	1	3.56368E-07	Clinical cohort	2190.46
Q8NCC3	5387_AFVSLGAPWGGVAK_2	1	1.38737E-10	Clinical cohort	4373.5
Q8NCG7	85073_IIHLQEEGASGR_3	1	4.83367E-35	Clinical cohort	1978.31
Q8NFV4	147414_QHLLTNLVEVDGR_3	3	1.00021E-10	Clinical cohort	3362.02
Q8NFV4	8227_AINIADELPR_2	3	1.11973E-13	Clinical cohort	3632.98
Q8NFV4	85921_ILAFPQR_2	3	4.42773E-12	Clinical cohort	2700.65
Q8TF72	201504_SSPATADKR_2	1	3.5167E-137	Clinical cohort	1077.95
Q92597	16158_MADC(UniMod:4)GGLPQISQPAK_2	13	2.46619E-59	Clinical cohort	2809.15
Q92597	18381_QHIVNDMNPGNLHLFINAYNSR_3	13	1.13765E-08	Clinical cohort	4302.82
Q92597	18382_QHIVNDMNPGNLHLFINAYNSR_4	13	2.96827E-24	Clinical cohort	4396.83
Q92597	20212_SIIGMGTGAGAYILTR_2	13	4.5165E-178	Clinical cohort	4536.59
Q92597	20213_SIIGMGTGAGAYILTR_3	13	1.20863E-81	Clinical cohort	4541.54
Q92597	21501_TASGSSVTSLDGTR_2	13	1.2168E-190	Clinical cohort	1802.8
Q92597	26341_YFVQGMGYMPSASMTR_2	13	2.69862E-72	Clinical cohort	3999.84
Q92597	26342_YFVQGMGYMPSASMTR_3	13	6.82136E-20	Clinical cohort	4006.45
Q92597	4952_EEMQSNVEVVHTYR_3	13	4.82654E-21	Clinical cohort	2299.44
Q92597	5685_EMQDVDLAEVKPLVEK_2	13	3.19128E-22	Clinical cohort	3681.66
Q92597	5686_EMQDVDLAEVKPLVEK_3	13	1.7632E-234	Clinical cohort	3695.56
Q92597	5687_EM(UniMod:35)QDVDLAEVKPLVEK_3	13	9.18346E-23	Clinical cohort	3363.34
Q92597	8769_GNRPVILTYHDIGMNHK_4	13	8.04834E-84	Clinical cohort	2721.13
Q96IU4	11384_INAANYASVK_2	8	0	Clinical cohort	3437.42
Q96IU4	22501_TPALIVYGDQDPMGQTSFEHLK_3	8	5.7006E-149	Clinical cohort	4324.65
Q96IU4	2317_AVAIDLPGLGHSK_2	8	1.1939E-150	Clinical cohort	3415.43
Q96IU4	2318_AVAIDLPGLGHSK_3	8	1.6597E-283	Clinical cohort	3449
Q96IU4	5196_EGTIQVQGQALFFR_2	8	3.21E-222	Clinical cohort	4231.95
Q96IU4	7324_FSSETWQNLGTLHR_2	8	1.02009E-13	Clinical cohort	3491.9
Q96IU4	7325_FSSETWQNLGTLHR_3	8	3.13669E-33	Clinical cohort	3579.01
Q96IU4	7345_FSVLLLHGIR_2	8	3.1281E-109	Clinical cohort	4185.54
Q99487	32891_DSGYPLIIFSHGLGAFR_2	1	2.69168E-07	Clinical cohort	5477.54
Q99685	15727_LTVPFLLLQGSADR_2	5	9.08043E-28	Clinical cohort	5482.65
Q99685	17264_NKTEVDIYNSDPLIC(UniMod:4)R_3	5	7.86456E-05	Clinical cohort	3442.22
Q99685	19419_RTPQSIPYQDLPHLVNADGQYLFC(UniMod:4)R_4	5	0.000139008	Clinical cohort	4865.53
Q99685	23422_VC(UniMod:4)FGIQLLNAVSR_2	5	1.51277E-07	Clinical cohort	5222.3
Q99685	7709_GAYLLMELAK_2	5	3.81803E-22	Clinical cohort	4512.91
Q9BV23	173574_SSLDDLSIDGQVK_2	1	4.68661E-59	Clinical cohort	3360.88
Q9BY50	7805_GDLLFLTNFR_2	1	4.43587E-05	Clinical cohort	5171.93
Q9H3G5	17471_NNDFYVTGESYAGK_2	5	5.68001E-62	Clinical cohort	2872.48
Q9H3G5	18044_QAGDFHQVIIR_3	5	7.92062E-44	Clinical cohort	2523.32
Q9H3G5	19726_SDSEVAGYIR_2	5	2.2435E-258	Clinical cohort	2315.62
Q9H3G5	7019_FLSLPEVR_2	5	5.2561E-166	Clinical cohort	3814.4
Q9H3G5	8162_GGGHILPYDQPLR_3	5	2.479E-159	Clinical cohort	2925.63
Q9HAT2	25916_WHQTADFGYVPNPK_3	3	1.3768E-226	Clinical cohort	3018.45
Q9HAT2	5606_ELSNTAAYQSVR_2	3	3.46941E-91	Clinical cohort	2014.93
Q9HAT2	6499_FASYINNDMVLQK_2	3	2.14366E-13	Clinical cohort	3675.38
Q9HB40	16149_MAAGIGLELYK_2	5	4.64283E-77	Clinical cohort	3776.37
Q9HB40	20423_SLETSAFVK_2	5	5.2532E-144	Clinical cohort	2590.6
Q9HB40	23235_VAEQVLNAVNK_2	5	1.6337E-258	Clinical cohort	2439.7
Q9HB40	5019_EFQTVPFYIFSESYGGK_3	5	6.69147E-06	Clinical cohort	5577.23
Q9HB40	856_AGHMVPSDQGDMALK_3	5	5.42124E-53	Clinical cohort	2251.59
Q9NUJ1	25464_VVALIGVATAADTLVTK_2	3	1.26555E-09	Clinical cohort	5131.58
Q9NUJ1	4599_EAEHHC(UniMod:4)LLHSPIPVNC(UniMod:4)PIR_4	3	3.54012E-20	Clinical cohort	3089
Q9NUJ1	7109_FNQLPVELK_2	3	3.14145E-12	Clinical cohort	3400.19
Q9NZP8	82121_GSEAINAPGDNPAK_2	1	1.97286E-35	Clinical cohort	1561.25
Q9UGM3	6806_FGQGSGPIVLDDVR_2	1	6.0846E-175	Clinical cohort	3612.72
Q9UGV2	116787_LNPINTTLLK_2	2	1.0667E-68	Clinical cohort	3491.15
Q9UGV2	128200_M(UniMod:35)HIAQDINQDNLQLFLNSYNGR_3	2	2.30562E-79	Clinical cohort	4404.36
Q9UHL4	16070_LYHSC(UniMod:4)ADPTGC(UniMod:4)GTGPDAR_3	4	2.8812E-113	Clinical cohort	1666.75
Q9UHL4	20531_SLPFGAQSTQR_2	4	3.2193E-230	Clinical cohort	2430.49
Q9UHL4	2061_ASHPEDPASVVEAR_3	4	9.1418E-282	Clinical cohort	2068.59
Q9UHL4	3773_DLFLQGAYDTVR_2	4	2.54397E-77	Clinical cohort	4212.37
Q9UMR5	13681_APQGVHLIC(UniMod:4)YSQGGLVC(UniMod:4)R_3	1	3.84502E-06	Clinical cohort	3382.31
Q9UN36	26117_YALNHPDTVEGLVLINIDPNAK_3	1	3.03857E-44	Clinical cohort	5029.59
Q9Y305	150611_MKDSYIEVLLPLGSEPELR_3	4	5.93239E-14	Clinical cohort	5284.54
Q9Y305	48603_EIVGASTNWR_2	4	3.25146E-34	Clinical cohort	2492.06
Q9Y305	94455_IAFSSTSLLK_2	4	1.4758E-125	Clinical cohort	3612.46
Q9Y305	97246_IFGGFLMR_2	4	8.1953E-156	Clinical cohort	4299.45
Q9Y570	8626_GLSNLFLSC(UniMod:4)PIPK_2	1	8.16777E-08	Clinical cohort	4688.85
Q9Y5Y6	199401_SQFVVTSNSNK_2	1	3.78351E-07	Clinical cohort	1646
Q9Y6Y8	106829_LEPMIVPDLDLK_2	8	3.23751E-10	Clinical cohort	4813.5
Q9Y6Y8	166573_SIIEC(UniMod:4)VDDFR_2	8	4.08741E-27	Clinical cohort	3758.88
Q9Y6Y8	193252_VEFLPVHWHSSLGGDATGVDR_3	8	8.75548E-10	Clinical cohort	3933.21
Q9Y6Y8	30625_DM(UniMod:35)ASLPSESNEPK_2	8	2.30196E-09	Clinical cohort	1820.99
Q9Y6Y8	44457_EMGIPLGPR_2	8	8.47217E-22	Clinical cohort	3109.91
Q9Y6Y8	61647_GFFNIYHPLDPVAYR_3	8	5.5036E-19	Clinical cohort	4703.02
Q9Y6Y8	7396_AHTSSTQLQEELEK_3	8	1.09056E-18	Clinical cohort	2167.5
Q9Y6Y8	81671_IDENYSLPTC(UniMod:4)K_2	8	2.76306E-12	Clinical cohort	2547.59
P29120	52532_FGFGLLNAK_2	1	2.00533E-27	detected only in intratumor	4707.52
Q58FG1	29572_DLIMDNC(UniMod:4)EELIPEYLNFIR_3	2	3.96701E-31	detected only in intratumor	7138.76
Q58FG1	29573_DLIMDNC(UniMod:4)EELIPEYLNFIR_4	2	9.53113E-11	detected only in intratumor	7142.76
Q6NTF9	107684_LFLLQQPLAPSGLTLK_2	1	1.96756E-29	detected only in intratumor	5995.43
Q92743	173200_SSELRPGEFVVAIGSPFSLQNTVTTGIVSTTQR_3	2	8.55669E-11	detected only in intratumor	6355.91
Q92743	80895_IAPAVVHIELFR_3	2	1.44988E-76	detected only in intratumor	4724.59
O00148	200694_VNIVFNYDMPEDSDTYLHR_3	3	0.000734185	Clinical cohort	4033.6
O00148	203998_VSVFFGGLSIK_2	2	2.99331E-05	Clinical cohort	1976.88
Q13085	83840_IGLAEEIR_2	2	0.00368552	Clinical cohort	61408.9
Q13085	84927_IIEFVPTK_2	2	0.000109314	Clinical cohort	3859.52
Q13085	152734_QVLIASHLPSYELR_3	3	8.52651E-05	Clinical cohort	65775.5
