# Supplementary material for: Depletion-dependent activity-based protein profiling using SWATH/DIA-MS detects serine hydrolase lipid remodeling in lung adenocarcinoma progression
Source: Nat Commun. 2025 May 27;16:4889. doi: 10.1038/s41467-025-59564-x (PMC12117057; doi:10.1038/s41467-025-59564-x)
Supplement: Supplementary file 8 — Supplementary Data 5 [file 41467_2025_59564_MOESM8_ESM.xlsx]

## Sheet: Description
( List of 1st.degre SH Interactors from PPI -SH interactome) The analysis of Protein-Protein interactions across co-depleted proteome based on the Integrated Interactions Database: http://iid.ophid.utoronto.ca/. List of 2078 Proteins - 1st degree interactors of 72 SH (RADDi, KS<=0.05).

## Sheet: Supplementary Data 5
Protein UniProt
O96017
Q9H5V8
P01137
P00749
O15492
P35232
Q16270
O43278
P42773
Q9NRA1
P25054
P31749
Q15831
Q04721
Q14790
P55085
P14210
Q06609
P26927
P51679
P35222
Q9UL15
P05026
Q96Q40
P30556
Q70IA6
P11142
Q92597
Q13049
Q9UI14
P03372
P12830
Q9UMR2
Q9UBY8
Q9Y5B0
Q92754
Q14258
Q9NPQ8
Q9GZS3
Q99417
Q13228
P19174
P82979
P04080
Q9NRD1
Q8IZH2
P05549
Q9NYA1
Q96JB5
Q8IWW6
Q16822
Q9H8H2
Q03135
Q8N878
Q659A1
Q9BYG5
Q00534
Q6B0K9
Q8IWL2
Q96L92
P35247
Q7L5N1
Q9Y6B2
Q99759
O15265
O00555
Q13153
P36897
P10451
P00736
P05067
Q01167
P36405
Q13501
P16104
Q15717
P85037
Q8IWL3
O00746
P0C7P0
P09622
P49459
Q9BT40
P63146
Q9P0J7
Q8TCN5
Q9H2U2
O14732
P49419
P07437
P62136
P08243
P62258
Q71U36
Q99426
P29218
O14980
P30041
Q6IBS0
Q9P289
Q9Y6E0
Q9Y5K6
O43405
P15848
O95390
P52849
Q2MV58
Q5VSG8
P55058
Q03167
P01889
Q8NBT0
P54802
Q9H0S4
Q70JA7
Q86UD1
Q14703
Q6UVY6
O60462
Q8WXG9
Q6NSJ0
Q15818
Q14CZ7
P51688
Q24JP5
P16870
Q96A26
Q15262
P55268
P78345
Q92545
P39060
Q95460
Q02083
P34059
Q9BZ76
O94808
Q86SF2
O15031
O75354
Q96PD2
O00462
P53708
Q5SRI9
Q6UWY0
Q9NV96
Q9UIQ6
Q9UHN6
Q9NZV5
Q9UBX1
Q9NZ08
Q9P273
Q9Y2E5
Q9P2B2
O43660
Q13625
Q9H0P0
P35227
P00533
Q9BPX6
Q5JU00
Q96DZ1
Q14203
Q96QE3
P68431
Q53S58
P23469
Q8IXK0
Q8WXI3
Q96KQ4
Q8IX03
Q6P1Q0
Q86XR8
P62807
A6NK89
P00387
Q8WUY8
P63172
Q8N2K0
Q96F24
Q0ZGT2
Q14160
Q6ZRP7
P38936
Q5TB80
Q6Y2X3
Q8TES7
Q96KR7
Q96JM7
Q6ZU80
Q00610
P04150
Q99952
P46937
Q99714
Q12834
Q92574
P61221
Q9NSA3
Q9NX40
Q9NRM7
Q9Y297
Q9Y3Q8
Q9P0N9
P05060
P02545
Q13639
Q5T0L3
P07550
P37235
Q9NPC1
Q9NZ43
P48039
P29401
Q13115
Q05923
P28562
P49736
P40855
Q6NUS6
Q6P5W5
O15218
Q504Y0
Q86TI2
Q96GX1
Q9H3G5
P31942
Q86X19
P53041
O94822
P19838
P04629
Q14999
P20073
P04183
Q07817
O14964
P41091
Q86UK5
Q06945
Q9BS26
Q96AE4
Q9HC97
Q9P0N5
Q96RS6
P20648
P60953
P67870
P17252
P49753
P78310
Q6NVY1
P12004
O75674
Q7Z5A8
O43768
O76071
P52630
P51955
Q3ZCQ8
P42331
O00418
Q7L591
Q15527
P42262
P19784
P49588
P51692
Q7Z698
P40126
Q08495
Q6ZVD7
P07196
O95863
P52597
Q8TAT6
Q99707
Q9UBE0
Q9NQG5
Q96S44
Q9NY25
Q96DC7
Q9NPB6
Q9UM54
Q96GM1
Q9NWX6
Q9NXR5
Q9HBW1
Q9NXH9
Q8NCI6
Q93052
Q9GZT8
Q96G46
O14498
Q17RF5
P07384
Q01523
O94905
Q15691
A4D1T9
P35579
O95968
O00626
P11511
Q6XE38
P08218
P01568
Q16635
O00182
Q6PEY0
O75015
P17931
Q5JR59
Q6UWV6
Q5GAN3
Q8NFB2
Q8NF86
Q9UK85
Q92187
Q8N3V7
Q9UN70
Q9NQX4
Q86WN2
P22794
Q12891
P15812
P27824
Q16880
O75208
Q13683
O75973
Q3SY77
Q5T7M9
O95274
P48509
Q9Y6A1
Q9NZJ5
Q92783
Q9NPD7
Q96EQ0
Q9Y274
Q8NDV1
Q6ZXV5
Q9BY71
Q9ULG6
Q9H6U8
Q9BU23
Q9UDX5
Q9H6F2
Q8IW92
Q9H6L2
Q8IWB1
Q86WK6
Q75T13
Q8WTV0
Q8N128
Q8WVV5
Q8ND25
Q8WVQ1
Q96NL6
Q9BZX2
P03886
O43837
P01241
O76031
Q04837
O75570
P51659
P10606
P55809
P20674
O15392
P11310
P30038
Q00059
P58557
O75439
O95299
P52736
P31040
P45954
P30480
O75390
P10109
P49448
O95674
P15954
P12074
P52815
P13196
Q15120
P27144
P03928
P14324
Q12931
P21912
O00483
P20839
O00422
P22830
Q9UIJ7
Q9Y2S7
Q9BQ95
Q9NUB1
Q9UDW1
Q9BPW8
Q96EF6
Q8N4T8
Q9UKB1
Q9NP92
Q9NVH6
Q9Y2Q3
Q96CU9
Q8WVK2
Q9UGM6
Q9HA77
Q9NVA1
Q96I59
Q96K76
Q9BUV8
Q96IX5
Q9UHN1
Q9H0R6
Q99798
Q9H4K7
Q99643
Q92947
Q96E11
Q9Y697
Q8WYA1
Q9NZJ6
Q9HBZ2
Q9Y375
Q16762
Q96BQ3
Q13885
Q04727
Q14194
P26640
O60383
P55854
Q13011
Q15047
P00338
P32456
Q14103
P04406
P13612
Q05516
P07195
Q04724
P43034
P68104
P12956
P61956
P68402
P04637
Q13432
P54274
P19320
P0CG47
Q9GZT6
Q5UIP0
Q92598
Q9NPI1
Q5T3J3
Q9GZR7
Q9H190
Q8WUX9
Q9UKR5
Q6EEV6
Q8TBB1
Q9Y3C7
Q96ID5
Q5RL73
Q9C0C9
Q9Y224
Q9NYB0
Q9Y4G2
Q9UKY1
P01042
Q14031
P08572
P29400
P53420
Q01955
Q9UGN5
P00813
P20366
P27487
P18509
P98179
P09681
P01286
Q03405
P16860
P27105
P01282
P01303
P01275
P04216
P10082
Q96B97
Q9BVC6
Q9ULV4
Q99623
Q9NZV6
Q9BWF3
Q7Z6Z7
P54259
P34897
P25311
P29474
O14544
Q07666
P30101
P11021
P52737
P10398
A6NFI3
O75360
O43765
P06733
P46379
P53673
P04049
P23142
O15318
O75467
O15015
P05090
P50222
Q5EBL2
Q9NW07
Q9BUI4
Q9UJM3
Q7L945
Q9UBU9
Q96BR6
Q8IXT1
Q16625
Q9Y5A6
Q9H9D4
Q14592
Q5VTD9
Q8NBS9
Q15025
Q3KP31
Q9H5H4
Q9NQ79
Q9UHF1
Q14766
Q96C00
Q9H7X3
Q9UBW5
Q12933
Q9HCE1
Q66K89
Q9P2R6
Q8N0Y2
Q9BV97
Q8TD17
P22626
P48637
P31946
P61586
P13667
P49411
O15294
P56537
P02751
P49368
O60260
P05388
O43399
P53367
P14735
P26038
O94903
P29372
P11171
O95456
P61981
P40763
O95817
P22392
P52306
P46108
P24941
P57081
O95149
P23508
Q6XQN6
Q13239
Q07352
Q9BRX5
Q96M27
Q9Y4K3
Q9Y3I0
Q15654
Q9BUJ0
Q13424
Q9UKV3
Q52LJ0
Q9Y478
Q9BZL4
Q15056
Q9GZM8
Q8N1G1
Q9Y6E2
Q9P2P5
Q13564
Q6P1N9
Q969U7
Q15102
Q9Y294
Q96BK5
P62330
O60356
O60739
P35052
Q8N357
Q92956
Q5HYA8
P78334
Q99496
P16949
B2RTY4
P42574
A1A4S6
P21333
P42768
O95758
P50579
P13804
P27986
P49407
P07814
P0CG48
P08631
P22681
P01023
O95302
A6H8Y1
P19878
P15498
O43516
P11274
P51608
P07355
P37173
O15068
P51793
P45983
P55210
P17081
P56181
O00401
P10911
O60890
O60318
P17706
O75534
O60879
O15511
P15169
P19447
P31150
P01375
P03891
P56945
P35268
P35125
P20585
O95477
P26641
O75914
P41743
P29692
P49756
P05412
P60896
O14730
O14559
O00461
P53667
P30048
P52566
P00441
P08579
O43396
P02765
O15085
P30622
P06702
O14613
P22695
P50552
P0DPB5
O43924
P52565
O60880
A7KAX9
P11387
P46940
P45984
P06239
P13693
P35580
O96013
P32121
P49792
P53992
P00395
P46779
P15153
P46531
P0DPB6
P02749
P23443
P19525
P53609
O95714
O95793
P09651
P05814
P09382
P05129
P33316
P50502
Q8TF01
Q96PY5
Q9Y6R4
Q9HCJ5
P62979
P62987
Q92945
Q9UPQ3
Q92664
Q92918
Q6DT37
Q6NWY9
Q07889
P84095
Q9BVG8
Q9NYZ3
Q12967
Q8TCU6
Q5VT25
Q9HC98
Q13576
Q8IWJ2
Q13490
Q13009
Q05513
Q68EM7
Q9UI12
Q96N96
Q8IVI9
Q14588
P82673
Q13751
Q5T0N5
Q9H0U4
Q86VI3
P62993
Q15907
P62750
Q08209
Q01968
Q16584
Q9P258
Q9Y5S2
Q15811
Q9Y6W5
Q75N03
Q9UPT8
Q9H4E7
Q8TEJ3
Q2M1Z3
Q86VW2
Q9Y285
Q13177
Q9P0L0
Q99819
Q8N264
Q15370
Q9NRR3
Q9UNA1
Q09666
Q8TAQ5
Q17R89
Q9UK97
Q92730
Q7Z7B0
Q9NQG6
Q08881
Q92558
P62899
Q6NZY7
P62851
Q8TBA6
Q92804
Q15637
Q9NRY4
Q12982
Q709F0
Q9Y2D8
Q5HYK7
P62820
Q6ZUM4
Q9H7P9
P63000
Q8N5V2
Q14204
Q86VB7
P61158
Q96GD3
Q9Y6K0
Q8TEW0
Q9C0B0
Q9BZ29
Q8IWV7
Q15052
Q13435
Q13464
Q9UPN3
Q92619
Q06830
Q96QD8
Q9Y6I3
Q96EY1
Q9H329
Q9BVA6
Q6UVK1
Q7Z6B7
Q9NYL2
Q96BX8
Q9H845
P98174
Q5HYC2
Q9P217
Q9Y2K7
Q8NEF9
P62829
Q96RU3
Q9NR50
Q86Y07
Q8WY36
Q96L34
Q9P2J5
Q9UKN1
P62834
Q02779
Q16643
P78344
Q9NR80
Q92993
Q9Y3E0
P62917
P61224
Q07912
Q07960
Q16659
Q8WWI1
Q9BXW9
Q9Y6D6
Q00005
Q3YEC7
Q15286
Q5S007
Q99490
Q2TB18
Q9H1E5
Q5U651
Q9BYG4
Q9Y265
Q9P2E2
Q9H4A3
Q8NF50
Q8NF91
Q9Y473
Q9UBB4
Q9H3Q1
Q9UHF7
Q9NRR8
Q5JSP0
Q9UKI2
Q9NQU5
Q9UQB8
Q16666
Q14155
Q9ULH1
Q92997
Q8IXB1
Q92496
Q96BY9
Q96DI7
Q13393
Q15642
Q13029
Q13277
Q96N67
Q9NSV4
Q00587
Q7Z333
Q9UHB6
P61106
Q9H4E5
Q9P286
P25788
P54578
P35228
O15205
O43353
P25686
P06753
P30504
P18615
O00232
P24928
O00141
P48556
P28070
P20810
P04792
O75155
P25786
P48643
P40337
O43707
P25787
P49721
P55072
P51665
P49720
O43242
O00231
P43686
P17980
P28062
P20618
P16035
P11802
P28065
P24864
P28066
P52907
P19532
P06493
P25789
P17861
P00558
P20248
P41002
O00487
P28074
P49917
P54725
P50990
O15344
P38398
P28072
P53350
P24385
P55036
O14965
O60566
O14818
O60884
P50991
P35998
P14635
P09661
Q9H8V3
Q15008
Q9BUN8
Q13616
P61201
Q9UBX2
Q9UMX0
P67936
Q86XK2
Q92905
Q9Y3I1
Q14D33
Q9UKV5
Q9HCM9
P62191
Q9H0R8
Q14164
Q9Y244
Q06323
P78346
Q13107
Q9BT73
Q15459
Q9Y5K5
Q8TAA3
Q5VYK3
Q9BT23
Q5RKV6
Q9BQ83
Q86TM6
P63208
Q13098
Q9NXW9
Q9UL46
P60901
Q6ZVN7
Q6ZW49
Q16186
Q9BYR5
Q9C0C7
Q9BY67
P62195
Q9UNM6
Q13200
Q9NQT4
Q06265
Q9UET6
Q92575
Q53H96
Q15843
Q9UHD9
Q0VDD7
Q14318
Q9ULR0
Q13148
Q16401
P61289
P62877
Q9BZH6
Q99460
Q9NQC7
Q9NPD3
Q96GF1
Q15051
Q70EK8
Q6P2H3
Q99436
P62333
Q00987
Q8NCP5
Q96K19
Q0PNE2
P06748
O43809
P01106
P51617
P32970
O14787
O95398
P12270
O00716
O75147
O00410
P52298
P18754
O95997
P24386
P49790
P37198
O75530
Q9BW27
Q8NFH5
Q9BY41
Q92793
Q7Z3B4
Q6ZQN5
Q9P1W9
Q86VU5
Q96C01
Q93009
P68400
Q9UBP0
Q9UII6
P55735
Q9C009
Q9HAV4
Q7Z589
Q9NR21
Q14974
Q12952
Q9UNN5
Q14980
Q9H0J4
Q9NRC8
Q99567
Q13547
Q96A37
Q6P1J9
P63279
Q9BUJ2
P78406
Q8NFH3
Q96EE3
Q96DB2
Q9BPU9
Q9H8S9
Q8N490
Q92973
P57740
Q6EMK4
Q8WUM0
Q6ZYL4
Q8N7H5
Q8NBZ7
Q9Y6D5
Q16543
Q9H444
Q12769
Q09472
Q9Y240
Q9BVL2
Q13283
P33981
P49327
O75150
P23771
P08237
P37231
O75381
P21580
O43463
P23258
P49454
P41208
O94973
P27816
O00159
P04083
P07942
P08621
O75319
P29466
O96028
O95573
O60244
O60814
O75376
A2VDJ0
A1L0T0
P62753
Q8NA61
P62266
P84243
Q05682
Q5H9I0
Q9Y6A5
Q5VT06
Q13347
Q4LE39
Q9ULW0
P60484
Q12955
Q99459
Q4VC44
Q14978
Q9NW13
Q9NWZ3
Q9BWH6
P78362
Q03164
Q92858
Q96SW2
Q00341
Q9NZ32
Q6P2E9
Q8IYT8
Q9NS39
Q9BVC4
Q6UX07
Q9UL41
Q504Q3
Q8N8A6
Q15058
Q8IUH3
Q86V48
Q13330
Q6NXT2
Q9NPJ6
Q9HAU0
Q8N6R0
Q9ULC5
Q9Y4G8
Q86XZ4
Q92831
Q9UJY1
P55201
Q15650
Q9H2C0
Q68DC2
Q14152
P61247
Q86YA3
P61513
Q8WWL2
P62318
Q9P0M9
Q7L190
Q96GS4
Q9Y490
Q9ULD2
Q7L2J0
Q14432
Q5JVF3
Q13416
Q969Q0
Q9UMY1
Q9UQ16
Q96KP6
Q8WYQ5
Q86UY8
Q8N4J0
Q9Y2T2
Q9NP97
Q12959
Q8IYT4
Q86XL3
Q5TC82
Q5VVJ2
P79522
Q12840
Q9BXM7
Q16698
Q9BTU6
P63104
Q9HCE7
P58340
Q9BUZ4
Q15776
Q13573
Q9C0D2
Q96E09
Q8N8R5
P62910
Q5VTR2
Q9BZE4
P32119
P45880
P50148
P48047
O15240
P05023
P11182
P25705
P07339
P46821
P06576
P18887
P10515
P30044
P11177
O95292
P08559
O14773
P09172
Q9NQR4
Q13310
Q15599
Q9P0T7
Q9UJS0
Q6KC79
P52943
Q13428
P53007
P40227
P27348
O94885
O75815
P36957
P07900
P29353
P05161
O60216
O75604
A0MZ66
P13010
P08238
P27708
P15735
P35558
P22415
O00429
P38919
P09874
O95433
O43617
P27361
O00750
P33527
O15264
P11498
P35637
P06241
P16333
O95166
P01857
P50402
P55055
Q12888
Q13395
P52732
Q13509
Q01844
Q96GG9
Q8N8N7
Q99615
Q9BXB1
Q8WU20
Q12951
Q16665
Q99704
Q00653
Q86X55
Q6PJG9
Q9H0W5
Q96RT1
P61326
Q06124
Q9UBV8
Q14653
Q13233
Q15464
Q13618
P52757
Q01518
Q9H6D7
Q9NZJ7
Q9Y496
Q99594
Q9UPT9
Q8IVT5
Q16526
Q53GQ0
Q9GZQ8
Q96KQ7
Q13322
Q8IV20
Q96EB6
Q02880
Q6IQ23
Q9UQL6
Q13133
Q49AN0
Q63ZY3
Q96FW1
Q7KZN9
Q92526
Q8IVM0
Q9H3D4
Q13418
P78527
Q99816
Q9ULL5
Q02318
Q9Y446
Q96CW1
Q6NUN9
Q9H492
Q06210
Q9Y6K9
Q9NZL4
P09972
P10809
P32929
P09417
P34932
P01019
P37840
O00170
P30990
P01178
P11940
P04181
P26639
P04075
Q9UBS9
Q9NPH2
Q04760
Q13303
P50395
Q8TCX5
Q562F6
P48163
Q92636
O14576
O43747
O15347
P17655
P31939
O75449
O75553
O43252
O43602
P04632
P07954
P61964
Q15046
Q9UKE5
Q96CN7
Q9Y3A5
Q15555
P62306
Q08499
Q13561
Q13409
Q04323
Q8TD16
Q9BWS9
Q8N157
Q9NRI5
P55010
Q8WW35
Q8IVD9
Q9BVA0
P63167
Q9NXR1
P51808
Q9Y266
Q96I15
Q9UI46
Q12965
Q9NWU2
Q05048
Q04917
Q07343
Q9Y6G9
P62316
Q66GS9
Q8WVJ2
Q8TF09
Q9UQN3
P18669
P41236
O60883
O96008
P11473
Q96LR4
Q8N543
P61970
Q9NVS9
P68371
Q6W2J9
Q01860
Q9H1E3
P55795
Q9UBB6
O75665
O14879
A4FU01
P08473
P10632
P02649
O75533
O75600
O75251
O75323
Q13325
Q96H96
Q8IYD2
Q9Y2T4
Q6DD88
Q9Y6E7
Q14197
Q9H1J1
Q15714
Q8NA69
P42704
Q96EL2
Q7Z434
Q07021
Q92731
Q96S79
Q9BSB4
Q8NCR6
Q9UPV0
Q9UL63
Q96JB6
Q9UER7
Q7Z7A1
Q8WWR8
Q68CZ1
Q5VW00
Q9H0A6
Q9Y2H9
Q8WV16
Q8N7X2
Q9BYD3
P48431
O14974
P29084
O75663
P09917
P04798
O00469
P23468
P11234
P06746
P78325
Q96I34
Q9H9S0
Q9BZP6
Q9H6A0
Q86UY6
P55060
Q8WVZ9
Q08426
Q96LD4
Q9UN71
Q9H159
P43246
Q8N4N3
P52789
O43681
O60437
P22087
Q15910
Q8N1G4
P35573
P30279
Q14997
Q6NZY4
P47755
Q9H269
Q8NA19
P40306
Q53EL6
P60900
P33176
Q9P2I0
Q9Y468
P10914
P19388
P12931
P19387
P04279
P06732
O15514
P53803
Q9GZU8
P52435
Q92530
Q9Y3R0
P62487
P30876
Q14241
Q15788
P52434
Q5JNW7
P62875
P36954
P61218
Q9P0P0
Q03519
Q9NX31
Q03518
Q15596
Q9Y6Q9
Q5JS54
Q2M3G0
Q9Y4E8
P19875
P16619
P13501
O95999
O14920
O94907
O14625
P07492
P02778
P01730
P08575
P48061
Q12884
P61073
P51671
Q07325
Q9BXL7
Q9BSJ2
Q9UK17
P01011
O60235
P03952
Q12778
Q9NS23
Q7L9L4
Q04912
Q9P0L2
Q9Y5Y6
P21583
P03956
P20800
P14138
P21810
P0DMV8
P07737
P05305
P01584
O95760
P09429
P08236
O43889
Q13873
P00734
O14733
O00192
Q92802
P41162
Q9HCN8
P55316
Q12947
Q99741
Q9Y6H3
Q9P0U3
Q9Y241
Q6IPR3
Q9Y305
Q6R327
Q3ZCM7
Q9P2F8
Q9UL03
Q14680
Q96PC2
Q9NWK9
Q9UBS3
P68366
Q9NVN8
Q9H0K1
Q6IF63
P08246
O75364
O94813
Q9C0D3
Q99962
Q86V97
Q9UK22
Q6PIW4
Q68CQ4
Q9NQY0
Q9BZF3
Q5JTY5
Q99961
Q6UXB4
O15355
O95373
O95757
P07093
O00214
P04278
P13473
O75436
Q4J6C6
Q15942
P42224
Q9H0E2
Q9UIV1
Q13287
Q92522
P53990
Q0P6H9
P17858
P49589
Q96IZ0
Q9UNH7
Q86VP6
Q6ZMK1
Q14247
P16403
Q6NYC1
Q9BTW9
Q53GS9
P34896
P41250
Q9GZZ9
O95749
P0CG38
Q9Y2G0
P51451
Q562R1
P13489
P62736
P19086
Q9BSL1
Q5XPI4
Q9BX10
P60709
A1L4K1
P06744
P10253
P05091
Q9H2A2
Q8WUM4
P60174
P80404
P46976
P48739
P16885
Q9BW61
P61960
Q5TGI0
P40925
Q9H0I9
Q8TBE9
P11766
P30837
P61604
P02748
P00746
P06681
P01031
P08603
P09871
P10144
P00747
P00751
P27918
P51124
P12544
P20718
P10909
P14222
P00966
P08670
P08134
Q96NY8
P62699
Q8NCW5
Q9C0B1
P60520
Q8NEP7
Q8TD22
Q99519
P51449
Q9Y5J7
P43490
Q9Y248
P61019
P53602
P12955
P16278
Q96Q11
O43159
P08708
P08151
O00425
O95363
O60784
O60832
P10070
P05362
O95503
P05455
O60765
P16871
Q8WVC0
Q9BXY0
P49711
Q8IY81
Q03701
P62805
Q9NVP1
Q8N567
P17020
P60866
Q86VM9
Q99848
Q13601
P41218
Q9NUL3
Q96K58
P39019
Q13206
P51858
Q00577
Q5JTH9
Q13823
P21127
Q8NHQ9
Q96GM8
P62841
Q9H9L3
Q6P158
Q99558
Q96GQ7
Q8TF42
Q6K0P9
Q6PD62
Q2Q1W2
Q12906
Q96JN0
Q969P0
P45973
P67809
Q96QD9
Q9Y2T7
P83916
Q969H0
Q9GZR2
Q9UNX3
P33992
P23396
P46783
Q9BQ75
Q49A26
P29558
Q9UL40
P62249
Q659C4
Q13185
P15880
Q9NQ55
Q5TA89
Q53GS7
Q8TBF4
Q15397
Q8TDN6
Q12926
Q9NWT1
P78316
P22492
Q9NY12
Q9HAN9
P46087
Q8N9T8
Q07955
Q8WTT2
Q92900
P42696
Q6PKG0
Q99676
P62906
P17480
P60033
Q9Y4C8
Q96MX3
Q9NXF1
Q9UGI8
Q96G25
Q7L2E3
P01133
P02745
P05155
P02746
Q92743
Q9BQB6
Q8TF05
P0C0L4
P0C0L5
Q16204
P10643
P02818
P01037
O43918
P01040
O95861
P07711
Q8N5S1
Q15915
Q8NA72
Q9NU19
Q8IW40
Q86UG4
Q15233
Q13201
O00757
P04424
P06400
O43683
O60603
P04626
O00499
Q6NT04
Q9UHC1
Q99814
Q05397
Q63HM2
P35221
P15056
Q9P0V8
P43146
Q9BVH7
Q96D59
Q08043
P56134
Q12913
Q9H2F9
P49674
Q8NFG4
P26717
P36894
Q9NUX5
Q9UBN7
P51116
Q9UG22
Q9UKG9
Q9H1I8
Q9Y2T1
P12814
Q7Z3H4
P07996
P01009
P02775
O00254
P05546
O95785
P01024
Q9NQ38
P12259
Q7Z3S9
Q9BQ70
P49913
Q16627
P17936
Q9UIV8
Q15323
Q9BYJ9
Q14242
P48594
P18827
Q5SZK8
P25116
Q96D09
Q07954
P00414
P00403
P02747
P01135
P03973
P06132
P05121
P55899
Q9UBQ0
P30740
Q9HCG7
Q14353
P14780
Q99684
Q9P2S5
P20160
P10646
P11215
P22557
Q13231
Q86UW9
P61962
P08697
P37287
Q9NNW5
Q08117
P15502
P28799
P10145
P54577
Q99062
P09919
P53396
O00187
P08174
P48740
P02814
O75356
Q08397
Q9NZB2
Q8N684
Q96HR8
Q13748
Q9NX24
P59665
Q13291
Q9NPE3
Q8WX93
Q12797
Q96PC5
Q9Y215
Q8N8S7
P15529
P17927
Q16610
P43220
P00748
Q9NZN8
Q04756
P48307
P05154
Q9Y2K1
Q9NQX3
Q15003
Q8IU80
Q6UXH1
Q92733
O95925
O00308
P00450
Q9HA64
P0DP25
P49715
Q6ZN18
[truncated: 79 more rows]
