# Supplementary material for: Depletion-dependent activity-based protein profiling using SWATH/DIA-MS detects serine hydrolase lipid remodeling in lung adenocarcinoma progression
Source: Nat Commun. 2025 May 27;16:4889. doi: 10.1038/s41467-025-59564-x (PMC12117057; doi:10.1038/s41467-025-59564-x)
Supplement: Supplementary file 9 — Supplementary Data 6 [file 41467_2025_59564_MOESM9_ESM.xlsx]

## Sheet: Description
Sheet	Column	Description
(Fig. 5a-1.) List of 978 Proteins co-depleted with the active SHs. 933 out of 978 proteins are annotated as 1st or 2nd degree interactors in Integrated Interactions Database. The statistical significance of depletion estimated by 2-sided KS-distance test. KS-test P-value <=0.05 in any of 4 conditions is considered significant.	Protein	Uniprot
	Interaction Type	1st or 2nd degree interaction in IID or NA
	KS-test in the current study	probability of depletion
	LUAD group with the most sign. P-value	group with the highest probability of protein depletion
		NA - Protein found in the depletome, but not annotated as an interactor in of IID databases.

## Sheet: Supplementary Data 6
Protein	Interaction Type in IID	KS-test current study	LUAD group with most sign. P-value from KS test
Q8N684	1st degree	6.18767e-05	ShortT
P14780	1st degree	0.000143648	ShortT
P04264	1st degree	0.000162966	LongT
P78310	1st degree	0.00020279	LongT
Q9BY67	1st degree	0.000311406	ShortT
O95793	1st degree	0.00038429	ShortN
P05154	1st degree	0.000531799	LongN
Q86X55	1st degree	0.000531799	LongT
O95757	1st degree	0.000563741	LongT
P01023	1st degree	0.000670637	LongT
P17858	1st degree	0.000690191	ShortT
O95433	1st degree	0.000710275	ShortN
P84095	1st degree	0.000773839	LongT
P78406	1st degree	0.000796177	LongT
P07942	1st degree	0.000866839	ShortT
Q96CW1	1st degree	0.000866839	LongT
Q15691	1st degree	0.00089166	LongN
Q04837	1st degree	0.000997689	LongN
P01011	1st degree	0.00105498	LongT
P56134	1st degree	0.00108476	LongN
Q8WWI1	1st degree	0.00108476	LongT
O43809	1st degree	0.00124568	ShortN
Q13428	1st degree	0.00139002	ShortT
P05362	1st degree	0.00177304	LongT
P01042	1st degree	0.0018704	LongT
Q9UGI8	1st degree	0.00213574	LongN
P21333	1st degree	0.00219279	LongT
P29466	1st degree	0.00249962	ShortN
P49407	1st degree	0.00249962	LongT
P04350	1st degree	0.002633	LongT
P41091	1st degree	0.00270211	ShortT
P10606	1st degree	0.00277288	LongN
Q13098	1st degree	0.00291952	LongN
P08572	1st degree	0.00307323	LongT
P62899	1st degree	0.00323429	ShortN
O43747	1st degree	0.00331768	ShortT
Q96CN7	1st degree	0.00376481	LongT
P10253	1st degree	0.00386056	ShortT
Q9P258	1st degree	0.00386056	LongT
Q05048	1st degree	0.00395853	ShortT
O00487	1st degree	0.00416127	LongN
P15848	1st degree	0.00416127	LongT
P52789	1st degree	0.00416127	LongT
P61586	1st degree	0.00416127	LongT
Q8TAT6	1st degree	0.00426614	LongT
P11766	1st degree	0.00437341	LongT
O95373	1st degree	0.00448312	LongN
Q9GZZ9	1st degree	0.00448312	ShortT
O43396	1st degree	0.0048274	LongT
O95302	1st degree	0.0048274	LongT
P02765	1st degree	0.0048274	ShortT
P11310	1st degree	0.0048274	ShortN
P68371	1st degree	0.0048274	ShortT
Q7L5N1	1st degree	0.00494738	LongN
Q96K76	1st degree	0.00494738	ShortN
P05155	1st degree	0.00507005	LongT
P0C0L5	1st degree	0.00519548	LongT
Q9BPW8	1st degree	0.00519548	LongN
P02746	1st degree	0.00545477	ShortT
P08134	1st degree	0.00545477	ShortT
P01024	1st degree	0.00558876	LongT
Q92973	1st degree	0.00558876	LongN
Q9C0C9	1st degree	0.00558876	LongT
P00450	1st degree	0.00572572	LongT
P10909	1st degree	0.00600876	ShortT
Q9Y4E8	1st degree	0.00615496	LongN
O14980	1st degree	0.00630436	LongN
P01031	1st degree	0.00630436	LongT
P24928	1st degree	0.00630436	ShortN
P25311	1st degree	0.00661301	LongT
P53992	1st degree	0.00661301	LongT
Q9HCN8	1st degree	0.00661301	LongT
P05091	1st degree	0.00677238	LongT
P61916	1st degree	0.00677238	LongT
Q9UBB4	1st degree	0.00677238	ShortN
Q9UJS0	1st degree	0.00710152	LongT
P02751	1st degree	0.00727143	LongT
Q9H0U4	1st degree	0.00727143	ShortT
Q9UBU9	1st degree	0.00727143	ShortT
P09972	1st degree	0.00780328	LongN
P12830	1st degree	0.00780328	ShortT
Q13409	1st degree	0.00798817	LongT
P01876	1st degree	0.00817697	LongT
P62333	1st degree	0.00817697	LongN
Q8NF50	1st degree	0.00817697	LongN
Q13547	1st degree	0.00856662	ShortT
Q6P2E9	1st degree	0.00876761	ShortN
Q9H0E2	1st degree	0.00876761	ShortT
P07711	1st degree	0.0089728	ShortN
P08174	1st degree	0.0089728	ShortN
P33316	1st degree	0.0089728	ShortN
P61962	1st degree	0.0089728	ShortT
Q08209	1st degree	0.0089728	LongN
Q13310	1st degree	0.0089728	ShortN
P48637	1st degree	0.00918228	LongN
P50552	1st degree	0.00918228	LongT
Q92945	1st degree	0.00918228	LongT
Q9UNM6	1st degree	0.00918228	LongN
P01857	1st degree	0.00939611	LongT
P34932	1st degree	0.00939611	LongN
P10109	1st degree	0.00961438	ShortN
P62330	1st degree	0.00961438	ShortN
P00441	1st degree	0.00983716	LongT
P51688	1st degree	0.0100645	ShortN
P68104	1st degree	0.0100645	ShortN
Q14155	1st degree	0.0100645	LongT
Q9ULV4	1st degree	0.0100645	ShortT
P00387	1st degree	0.0102966	ShortT
P28062	1st degree	0.0102966	LongT
Q12840	1st degree	0.0102966	ShortN
O60784	1st degree	0.010775	ShortN
P27708	1st degree	0.010775	LongT
P09382	1st degree	0.0110216	LongT
Q00577	1st degree	0.0110216	LongT
O94903	1st degree	0.0112731	LongN
P02786	1st degree	0.0112731	LongT
P42704	1st degree	0.0112731	ShortN
P50281	1st degree	0.0112731	ShortT
Q9NPH2	1st degree	0.0112731	ShortN
Q00610	1st degree	0.0115298	LongT
P02747	1st degree	0.0117916	LongN
P55795	1st degree	0.0117916	ShortT
P61964	1st degree	0.0117916	LongT
Q96RS6	1st degree	0.0117916	LongT
Q9NUB1	1st degree	0.0117916	ShortN
Q9BWS9	1st degree	0.0120587	LongN
Q9BXW9	1st degree	0.0120587	LongT
P53041	1st degree	0.0123311	ShortT
Q9BUJ2	1st degree	0.0123311	LongT
P04181	1st degree	0.012609	LongN
P08559	1st degree	0.012609	ShortT
P27361	1st degree	0.0128924	LongN
P40763	1st degree	0.0128924	ShortN
P53396	1st degree	0.0128924	LongT
Q96AE4	1st degree	0.0128924	LongT
O43765	1st degree	0.0131815	ShortT
P45954	1st degree	0.0131815	ShortN
Q13885	1st degree	0.0131815	LongT
Q9NZ08	1st degree	0.0131815	LongT
P35637	1st degree	0.0134762	ShortN
P62136	1st degree	0.0134762	LongN
P31040	1st degree	0.0143957	LongT
P62906	1st degree	0.0143957	LongN
Q9Y6E2	1st degree	0.0143957	ShortT
P48739	1st degree	0.0147143	LongT
P51808	1st degree	0.0147143	LongT
Q9UQB8	1st degree	0.0147143	LongN
O95573	1st degree	0.0153701	ShortT
Q6P1N9	1st degree	0.0153701	LongN
P05026	1st degree	0.0157076	LongT
P35573	1st degree	0.0157076	ShortT
P53602	1st degree	0.0157076	LongT
P52597	1st degree	0.0164021	ShortN
Q6DD88	1st degree	0.0164021	ShortT
O15511	1st degree	0.0167594	ShortN
O75436	1st degree	0.0171234	LongT
Q9Y3I1	1st degree	0.0171234	LongT
P11498	1st degree	0.0174945	LongT
Q16401	1st degree	0.0174945	LongN
Q9NQX3	1st degree	0.0174945	ShortT
Q14194	1st degree	0.0178725	ShortN
P05388	1st degree	0.0182576	LongN
P48643	1st degree	0.0182576	LongN
P50990	1st degree	0.0182576	LongN
Q13283	1st degree	0.0190498	LongN
P34897	1st degree	0.019457	LongN
Q9UNN5	1st degree	0.019457	LongT
P55735	1st degree	0.0202944	LongT
O14732	1st degree	0.0207247	LongT
Q13153	1st degree	0.0207247	ShortN
O00469	1st degree	0.0211629	LongT
P62487	1st degree	0.0216092	LongN
Q13509	1st degree	0.0216092	ShortT
P11171	1st degree	0.0220637	ShortN
P22695	1st degree	0.0220637	LongN
P08575	1st degree	0.0225264	LongT
Q08426	1st degree	0.0225264	LongN
O15355	1st degree	0.0229975	ShortT
P02749	1st degree	0.0229975	ShortT
P05023	1st degree	0.0229975	LongT
P35222	1st degree	0.0229975	ShortT
P50991	1st degree	0.0229975	LongN
Q04323	1st degree	0.0229975	LongN
P47755	1st degree	0.0244625	LongN
P68366	1st degree	0.0244625	ShortT
Q7Z6Z7	1st degree	0.0244625	LongT
Q99436	1st degree	0.0244625	ShortN
P02745	1st degree	0.0260076	ShortT
P08571	1st degree	0.0260076	LongT
P13804	1st degree	0.0260076	LongT
Q13576	1st degree	0.0260076	LongN
O00231	1st degree	0.026541	LongN
O43504	1st degree	0.0270839	ShortT
O75534	1st degree	0.0270839	ShortN
P01834	1st degree	0.0270839	ShortT
P04216	1st degree	0.0270839	ShortN
P27797	1st degree	0.0270839	LongT
P28799	1st degree	0.0270839	ShortT
Q13347	1st degree	0.0270839	LongT
P07814	1st degree	0.0281982	LongN
Q9H444	1st degree	0.0287701	LongN
P0C0L4	1st degree	0.0299436	LongT
P27824	1st degree	0.0299436	ShortN
Q9BU23	1st degree	0.0299436	LongN
P16278	1st degree	0.0317809	LongT
P09622	1st degree	0.0330586	LongT
Q9UNH7	1st degree	0.0343798	LongN
P30876	1st degree	0.0350571	LongT
P51665	1st degree	0.0350571	ShortT
Q9P2J5	1st degree	0.0350571	LongN
Q9Y6G9	1st degree	0.0350571	ShortN
P08603	1st degree	0.0357458	ShortT
P62910	1st degree	0.0364459	LongN
Q92598	1st degree	0.0371576	LongT
Q99714	1st degree	0.0371576	ShortT
P20674	1st degree	0.0378811	ShortT
P05546	1st degree	0.0386164	LongT
P07996	1st degree	0.0386164	LongT
P31939	1st degree	0.0386164	LongN
P61289	1st degree	0.0386164	ShortN
Q01518	1st degree	0.0386164	LongT
P67870	1st degree	0.0393638	ShortN
Q9UI12	1st degree	0.0401234	ShortN
O00159	1st degree	0.0408954	ShortN
O00461	1st degree	0.0408954	ShortT
O75439	1st degree	0.0408954	ShortT
Q15370	1st degree	0.0408954	LongN
P07900	1st degree	0.0416798	LongN
Q9NVP1	1st degree	0.0416798	ShortN
Q9UKV3	1st degree	0.0416798	LongN
O00483	1st degree	0.0424769	ShortN
P08237	1st degree	0.0424769	LongT
Q03518	1st degree	0.0424769	ShortT
Q14258	1st degree	0.0424769	ShortT
Q9BQB6	1st degree	0.0424769	LongN
O95299	1st degree	0.0432868	ShortN
P21810	1st degree	0.0432868	ShortT
O75600	1st degree	0.0441096	ShortT
P11021	1st degree	0.0441096	LongT
P78344	1st degree	0.0441096	LongN
Q6R327	1st degree	0.0441096	ShortT
Q9UBE0	1st degree	0.0441096	ShortN
O14818	1st degree	0.0449455	ShortN
P17980	1st degree	0.0457946	LongN
P18754	1st degree	0.0457946	ShortT
P49913	1st degree	0.0457946	ShortT
Q92900	1st degree	0.0457946	LongT
P02768	1st degree	0.0475333	ShortN
P07954	1st degree	0.0475333	LongN
P43686	1st degree	0.0475333	ShortN
P02748	1st degree	0.0484231	LongT
P08236	1st degree	0.0484231	ShortT
P19320	1st degree	0.0484231	LongN
Q13561	1st degree	0.0484231	LongN
O95758	1st degree	0.0493268	ShortN
P00966	1st degree	0.0493268	LongT
P55058	1st degree	0.0493268	LongT
P15153	1st degree
Q9NR30	2nd degree	1.74718e-05	LongT
Q7L266	2nd degree	7.06126e-05	ShortN
P56199	2nd degree	7.79184e-05	LongT
P55083	2nd degree	0.00010106	LongT
P05556	2nd degree	0.000162966	LongT
Q14126	2nd degree	0.00017352	LongT
Q15075	2nd degree	0.000196587	ShortN
P27694	2nd degree	0.000215751	ShortT
P49023	2nd degree	0.000259467	ShortN
Q9P035	2nd degree	0.000275801	LongT
Q9BSV6	2nd degree	0.000284325	ShortN
P00519	2nd degree	0.000293096	LongT
P04062	2nd degree	0.000302121	ShortT
Q16531	2nd degree	0.00038429	LongT
P35749	2nd degree	0.000395921	ShortN
P04211	2nd degree	0.000420178	LongT
P01860	2nd degree	0.000472919	LongT
P04844	2nd degree	0.000472919	LongT
Q15165	2nd degree	0.000472919	ShortN
P08185	2nd degree	0.000531799	LongT
P08514	2nd degree	0.000531799	LongT
Q99447	2nd degree	0.000531799	ShortT
Q709C8	2nd degree	0.000547553	ShortT
Q8TCT9	2nd degree	0.000547553	ShortT
Q92542	2nd degree	0.000547553	LongT
P02790	2nd degree	0.000563741	LongT
Q5SY16	2nd degree	0.000615027	ShortN
Q9UMS4	2nd degree	0.000615027	LongT
O75396	2nd degree	0.000633067	LongN
P51153	2nd degree	0.000633067	ShortT
Q9BXB4	2nd degree	0.000633067	ShortN
P15104	2nd degree	0.0006516	ShortT
O94788	2nd degree	0.000710275	LongT
P16452	2nd degree	0.000710275	LongT
P05166	2nd degree	0.000752085	ShortN
P17812	2nd degree	0.000752085	ShortN
Q96JH7	2nd degree	0.000752085	ShortT
Q9UNE7	2nd degree	0.000842662	LongN
P13760	2nd degree	0.000866839	LongT
Q01581	2nd degree	0.000866839	LongT
Q9NPD8	2nd degree	0.000866839	LongT
O94760	2nd degree	0.00089166	ShortN
Q9BQG0	2nd degree	0.000917139	ShortN
Q2TAY7	2nd degree	0.000997689	LongT
Q96TC7	2nd degree	0.000997689	LongT
P36551	2nd degree	0.00105498	LongT
Q8NFC6	2nd degree	0.00105498	ShortT
P01871	2nd degree	0.00108476	LongT
P07360	2nd degree	0.00114667	ShortT
Q6P1K2	2nd degree	0.00114667	ShortN
Q9UBR2	2nd degree	0.00121183	LongT
P01859	2nd degree	0.00124568	LongT
P36969	2nd degree	0.00124568	LongN
O15533	2nd degree	0.00128041	ShortT
O15247	2nd degree	0.00139002	LongN
P01861	2nd degree	0.00139002	LongT
Q9Y617	2nd degree	0.00139002	ShortT
P16435	2nd degree	0.00142845	LongN
P35908	2nd degree	0.00142845	ShortT
O00115	2nd degree	0.00146785	ShortN
Q9NY65	2nd degree	0.00159217	LongT
P04217	2nd degree	0.00163571	LongT
Q14677	2nd degree	0.00163571	LongN
A2RRP1	2nd degree	0.00172613	LongN
P13611	2nd degree	0.00172613	LongT
Q16706	2nd degree	0.00172613	LongT
Q30154	2nd degree	0.00172613	LongT
Q92688	2nd degree	0.00172613	LongT
Q04206	2nd degree	0.00177304	LongT
O75083	2nd degree	0.0018704	LongT
P12110	2nd degree	0.00192091	LongT
Q05707	2nd degree	0.00192091	ShortT
P02679	2nd degree	0.00197267	LongT
Q9P246	2nd degree	0.00197267	LongT
Q9ULT8	2nd degree	0.00197267	ShortT
Q9BS40	2nd degree	0.00202571	LongN
Q14232	2nd degree	0.00208006	LongN
Q9UKU7	2nd degree	0.00208006	LongT
P35606	2nd degree	0.00213574	LongT
Q6UX06	2nd degree	0.00213574	ShortT
P11678	2nd degree	0.00219279	ShortT
P62873	2nd degree	0.00219279	LongT
P83881	2nd degree	0.00219279	LongN
O00592	2nd degree	0.00249962	LongT
O60341	2nd degree	0.00249962	LongT
P55259	2nd degree	0.00249962	LongN
O75475	2nd degree	0.00256551	ShortN
Q16831	2nd degree	0.002633	ShortT
P08567	2nd degree	0.00270211	LongN
P51884	2nd degree	0.00277288	LongT
P07225	2nd degree	0.00284534	ShortT
Q96AY3	2nd degree	0.00284534	ShortT
Q13488	2nd degree	0.00291952	ShortN
Q8NFW8	2nd degree	0.00299548	LongT
P19827	2nd degree	0.00307323	ShortT
Q92692	2nd degree	0.00307323	ShortT
Q9Y376	2nd degree	0.00307323	LongN
O60568	2nd degree	0.00315282	ShortN
P13647	2nd degree	0.00315282	LongT
Q15393	2nd degree	0.00315282	LongT
Q9Y2S2	2nd degree	0.00315282	ShortN
P23786	2nd degree	0.00323429	ShortT
Q9Y696	2nd degree	0.00331768	LongN
P16219	2nd degree	0.00340303	ShortN
O75369	2nd degree	0.00367122	ShortT
Q9P2R3	2nd degree	0.00367122	ShortT
Q9Y6Q5	2nd degree	0.00367122	ShortT
O95352	2nd degree	0.00376481	LongN
P31930	2nd degree	0.00376481	LongN
P35625	2nd degree	0.00376481	ShortT
P49406	2nd degree	0.00376481	LongT
P22792	2nd degree	0.00386056	LongT
Q0VDF9	2nd degree	0.00386056	LongT
P05165	2nd degree	0.00395853	ShortN
P36404	2nd degree	0.00395853	ShortN
P53634	2nd degree	0.00395853	LongT
Q06033	2nd degree	0.00395853	ShortT
Q9BY32	2nd degree	0.00395853	ShortN
Q9UBX5	2nd degree	0.00395853	ShortT
P30047	2nd degree	0.00416127	ShortN
Q92769	2nd degree	0.00416127	ShortT
Q99538	2nd degree	0.00416127	LongT
Q16658	2nd degree	0.00426614	LongT
O43169	2nd degree	0.00437341	LongN
P35858	2nd degree	0.00437341	LongT
P49458	2nd degree	0.00437341	LongN
Q13308	2nd degree	0.00437341	ShortT
Q15366	2nd degree	0.00437341	LongT
Q9BR76	2nd degree	0.00437341	LongT
P31483	2nd degree	0.00459532	ShortT
Q7Z406	2nd degree	0.00471007	ShortN
P01877	2nd degree	0.0048274	ShortT
P49591	2nd degree	0.0048274	ShortN
Q13421	2nd degree	0.0048274	LongT
Q92544	2nd degree	0.0048274	LongT
O95881	2nd degree	0.00494738	LongN
P40199	2nd degree	0.00494738	ShortT
Q6PCB0	2nd degree	0.00507005	ShortN
O75695	2nd degree	0.00519548	ShortT
P00325	2nd degree	0.00519548	ShortT
P21397	2nd degree	0.00519548	ShortT
Q9BUH6	2nd degree	0.00519548	ShortT
Q9BXS5	2nd degree	0.00519548	ShortT
P51610	2nd degree	0.0053237	ShortT
Q15904	2nd degree	0.0053237	ShortT
O43847	2nd degree	0.00545477	ShortN
P11047	2nd degree	0.00545477	ShortT
O60664	2nd degree	0.00558876	LongN
P42566	2nd degree	0.00558876	ShortN
Q9NY15	2nd degree	0.00558876	LongN
Q9P016	2nd degree	0.00558876	LongN
Q9UHD1	2nd degree	0.00558876	ShortT
P12694	2nd degree	0.00572572	ShortN
Q969T9	2nd degree	0.00572572	LongT
P01033	2nd degree	0.0058657	LongT
Q8N183	2nd degree	0.0058657	LongT
Q9BQE3	2nd degree	0.0058657	LongT
P16284	2nd degree	0.00600876	LongT
P35442	2nd degree	0.00600876	LongT
Q14165	2nd degree	0.00600876	LongN
Q9H3H3	2nd degree	0.00600876	LongN
Q9UBS4	2nd degree	0.00600876	ShortT
Q9Y2J2	2nd degree	0.00600876	ShortN
P28161	2nd degree	0.00615496	LongN
Q9H477	2nd degree	0.00615496	ShortT
P13645	2nd degree	0.00630436	ShortT
P27169	2nd degree	0.00630436	LongT
P46063	2nd degree	0.00630436	ShortT
P54687	2nd degree	0.00630436	ShortT
Q13724	2nd degree	0.00630436	LongT
Q9BRP4	2nd degree	0.00630436	LongT
Q9Y2A7	2nd degree	0.00630436	LongN
P11277	2nd degree	0.00661301	LongN
P53680	2nd degree	0.00661301	LongT
Q10588	2nd degree	0.00661301	LongT
Q13162	2nd degree	0.00661301	LongN
Q7Z2W4	2nd degree	0.00661301	LongN
Q8NEZ5	2nd degree	0.00661301	LongT
Q9UPU5	2nd degree	0.00661301	ShortN
Q13045	2nd degree	0.00677238	ShortT
Q8WVY7	2nd degree	0.00677238	ShortN
Q9UBG0	2nd degree	0.00677238	LongN
Q9UHR5	2nd degree	0.00677238	ShortT
P06280	2nd degree	0.00693519	LongT
P14136	2nd degree	0.00693519	LongN
P62633	2nd degree	0.00693519	ShortN
P02750	2nd degree	0.00727143	LongT
Q969X5	2nd degree	0.00727143	ShortT
P13686	2nd degree	0.00744498	ShortT
Q9BYT8	2nd degree	0.00744498	LongN
O60518	2nd degree	0.00762224	ShortT
P05107	2nd degree	0.00762224	ShortT
Q04446	2nd degree	0.00762224	LongT
Q13247	2nd degree	0.00762224	LongT
Q96IY4	2nd degree	0.00762224	ShortT
Q9NPF4	2nd degree	0.00762224	ShortT
Q9UHG3	2nd degree	0.00762224	ShortN
Q9UKK3	2nd degree	0.00762224	ShortN
P12109	2nd degree	0.00780328	LongT
P80511	2nd degree	0.00780328	LongT
Q13151	2nd degree	0.00780328	ShortN
Q6ZRS2	2nd degree	0.00780328	LongT
Q8NBJ7	2nd degree	0.00780328	ShortN
Q9UFN0	2nd degree	0.00780328	LongN
O75821	2nd degree	0.00798817	ShortN
P20700	2nd degree	0.00798817	ShortN
Q16719	2nd degree	0.00798817	ShortN
A4D1P6	2nd degree	0.00817697	LongT
O75351	2nd degree	0.00817697	ShortN
O95834	2nd degree	0.00817697	ShortT
P14543	2nd degree	0.00817697	LongT
P18428	2nd degree	0.00817697	ShortT
P49915	2nd degree	0.00817697	ShortT
P50851	2nd degree	0.00817697	ShortT
Q10589	2nd degree	0.00817697	LongT
Q9NV31	2nd degree	0.00817697	LongT
Q9NVN3	2nd degree	0.00817697	LongT
P23083	2nd degree	0.00836977	LongT
P02671	2nd degree	0.00856662	LongT
P40429	2nd degree	0.00856662	ShortT
P55884	2nd degree	0.00856662	LongT
Q9NRP0	2nd degree	0.00856662	LongT
O14672	2nd degree	0.00876761	ShortT
P04196	2nd degree	0.00876761	LongT
P29966	2nd degree	0.00876761	ShortN
P51570	2nd degree	0.00876761	LongT
Q63HN8	2nd degree	0.00876761	LongN
O43795	2nd degree	0.0089728	ShortT
O94855	2nd degree	0.0089728	ShortT
P02549	2nd degree	0.0089728	ShortN
P04275	2nd degree	0.0089728	LongT
P0CG39	2nd degree	0.0089728	LongN
P11117	2nd degree	0.0089728	ShortT
P20933	2nd degree	0.0089728	ShortT
P22234	2nd degree	0.0089728	ShortN
P29350	2nd degree	0.0089728	ShortN
P49755	2nd degree	0.0089728	LongN
P61225	2nd degree	0.0089728	LongT
P69905	2nd degree	0.0089728	LongN
P98082	2nd degree	0.0089728	LongT
Q15833	2nd degree	0.0089728	LongN
Q8IUI8	2nd degree	0.0089728	LongT
Q92696	2nd degree	0.0089728	ShortT
Q92747	2nd degree	0.0089728	ShortT
Q9H0B6	2nd degree	0.0089728	LongN
Q9H0W9	2nd degree	0.0089728	ShortN
Q9H307	2nd degree	0.0089728	ShortT
Q9H4G4	2nd degree	0.0089728	LongT
Q9H6S3	2nd degree	0.0089728	ShortT
O14618	2nd degree	0.00918228	LongN
P20702	2nd degree	0.00918228	ShortT
P31153	2nd degree	0.00918228	ShortN
P40261	2nd degree	0.00918228	LongN
Q15185	2nd degree	0.00918228	ShortN
Q9H0R5	2nd degree	0.00918228	LongN
Q9H0U3	2nd degree	0.00918228	LongN
Q9Y383	2nd degree	0.00918228	LongN
O14744	2nd degree	0.00939611	ShortN
Q16222	2nd degree	0.00939611	ShortT
P01619	2nd degree	0.00961438	ShortN
P02743	2nd degree	0.00961438	LongT
P08754	2nd degree	0.00961438	LongN
P25774	2nd degree	0.00961438	ShortT
Q14767	2nd degree	0.00961438	LongT
Q8NBJ5	2nd degree	0.00961438	ShortT
Q9C037	2nd degree	0.00961438	ShortT
Q9Y2D5	2nd degree	0.00961438	ShortN
P21399	2nd degree	0.00983716	ShortT
Q9BRP8	2nd degree	0.00983716	LongT
P16070	2nd degree	0.0100645	LongT
P22105	2nd degree	0.0100645	LongT
P40616	2nd degree	0.0100645	ShortT
Q8N766	2nd degree	0.0100645	LongT
Q92879	2nd degree	0.0100645	ShortT
O00303	2nd degree	0.0102966	ShortN
O75131	2nd degree	0.0102966	LongT
P02675	2nd degree	0.0102966	LongT
P06756	2nd degree	0.0102966	LongT
P08294	2nd degree	0.0102966	ShortT
P15586	2nd degree	0.0102966	ShortT
Q07065	2nd degree	0.0102966	LongN
Q15287	2nd degree	0.0102966	LongT
Q15436	2nd degree	0.0102966	LongN
Q96AC1	2nd degree	0.0102966	ShortT
Q96CM8	2nd degree	0.0102966	LongT
Q96P70	2nd degree	0.0102966	ShortN
Q9P2T1	2nd degree	0.0102966	LongN
P08962	2nd degree	0.0105334	ShortT
Q8IW45	2nd degree	0.0105334	LongT
O43684	2nd degree	0.010775	ShortT
Q9BVN2	2nd degree	0.010775	ShortN
Q9HCB6	2nd degree	0.010775	ShortT
Q9HD89	2nd degree	0.010775	LongT
O15067	2nd degree	0.0110216	LongT
O94874	2nd degree	0.0110216	LongN
P08240	2nd degree	0.0110216	ShortT
P12235	2nd degree	0.0110216	ShortT
P13727	2nd degree	0.0110216	ShortT
P42765	2nd degree	0.0110216	ShortT
Q01813	2nd degree	0.0110216	LongT
Q96SI9	2nd degree	0.0110216	LongN
O75880	2nd degree	0.0112731	ShortT
O95989	2nd degree	0.0112731	ShortN
P20036	2nd degree	0.0112731	ShortN
P29590	2nd degree	0.0112731	ShortT
P33121	2nd degree	0.0112731	ShortN
Q13126	2nd degree	0.0112731	ShortT
Q3KQV9	2nd degree	0.0112731	ShortT
Q969L2	2nd degree	0.0112731	LongT
Q9GZN8	2nd degree	0.0112731	ShortT
Q9H0D6	2nd degree	0.0112731	ShortT
Q9HCU5	2nd degree	0.0112731	LongT
Q9NP81	2nd degree	0.0112731	ShortT
Q9UN86	2nd degree	0.0112731	ShortT
Q9Y3C6	2nd degree	0.0112731	ShortN
P09525	2nd degree	0.0115298	LongN
P30405	2nd degree	0.0115298	LongT
Q04941	2nd degree	0.0115298	LongT
Q08722	2nd degree	0.0115298	ShortT
P05141	2nd degree	0.0117916	ShortT
Q13263	2nd degree	0.0117916	ShortN
O60306	2nd degree	0.0120587	ShortT
P51888	2nd degree	0.0120587	LongT
Q5T5U3	2nd degree	0.0120587	ShortN
O43760	2nd degree	0.0123311	ShortN
O75153	2nd degree	0.0123311	LongN
P21980	2nd degree	0.0123311	ShortT
Q14108	2nd degree	0.0123311	LongT
Q9H9A6	2nd degree	0.0123311	LongN
Q9HC84	2nd degree	0.0123311	ShortT
O15260	2nd degree	0.012609	LongT
P22059	2nd degree	0.012609	LongT
P43307	2nd degree	0.012609	LongT
Q00796	2nd degree	0.012609	LongT
Q05519	2nd degree	0.012609	ShortN
Q9BY44	2nd degree	0.012609	LongT
Q9H832	2nd degree	0.012609	ShortT
Q9HCC0	2nd degree	0.012609	ShortT
P11172	2nd degree	0.0128924	ShortT
P53597	2nd degree	0.0128924	LongT
Q53HC9	2nd degree	0.0128924	ShortT
Q96EP5	2nd degree	0.0128924	ShortN
Q9HC35	2nd degree	0.0128924	LongT
O60313	2nd degree	0.0131815	ShortN
O95319	2nd degree	0.0131815	ShortN
O95630	2nd degree	0.0131815	LongT
P00846	2nd degree	0.0131815	LongT
P01764	2nd degree	0.0131815	ShortT
P02656	2nd degree	0.0131815	LongN
P10620	2nd degree	0.0131815	ShortT
P17096	2nd degree	0.0131815	ShortN
P25942	2nd degree	0.0131815	LongT
P46459	2nd degree	0.0131815	ShortT
Q8NHP8	2nd degree	0.0131815	ShortN
Q96JM3	2nd degree	0.0131815	ShortT
Q96TA1	2nd degree	0.0131815	LongN
Q9NUY8	2nd degree	0.0131815	LongN
O60869	2nd degree	0.0134762	ShortN
Q14005	2nd degree	0.0134762	LongT
Q15063	2nd degree	0.0134762	ShortN
Q15417	2nd degree	0.0134762	ShortN
Q8NBQ5	2nd degree	0.0134762	ShortN
Q9NP61	2nd degree	0.0134762	ShortT
O00423	2nd degree	0.0137768	LongT
P98160	2nd degree	0.0137768	LongT
P15289	2nd degree	0.0140832	ShortT
P50895	2nd degree	0.0140832	ShortT
Q969H8	2nd degree	0.0140832	LongT
Q9Y4P3	2nd degree	0.0140832	LongT
A0FGR8	2nd degree	0.0143957	ShortN
Q03252	2nd degree	0.0143957	ShortN
Q14624	2nd degree	0.0143957	LongT
Q96HD9	2nd degree	0.0143957	ShortT
Q9Y512	2nd degree	0.0143957	ShortN
Q9Y6X4	2nd degree	0.0143957	ShortN
O95747	2nd degree	0.0147143	LongT
P26006	2nd degree	0.0147143	LongT
P39748	2nd degree	0.0147143	ShortN
Q13426	2nd degree	0.0147143	ShortN
Q9UQE7	2nd degree	0.0147143	LongT
P62995	2nd degree	0.015039	ShortT
A0AV96	2nd degree	0.0153701	LongN
P01602	2nd degree	0.0153701	ShortT
P08123	2nd degree	0.0153701	ShortN
P14854	2nd degree	0.0153701	LongN
P16615	2nd degree	0.0153701	ShortT
Q00325	2nd degree	0.0153701	ShortT
Q15437	2nd degree	0.0153701	LongT
Q8N983	2nd degree	0.0153701	ShortN
P04839	2nd degree	0.0157076	ShortT
P51114	2nd degree	0.0157076	LongT
Q5TEJ8	2nd degree	0.0157076	LongN
Q8IUX7	2nd degree	0.0157076	LongT
Q8NBX0	2nd degree	0.0157076	LongT
Q96G03	2nd degree	0.0157076	LongT
Q9BUF5	2nd degree	0.0157076	ShortT
P61254	2nd degree	0.0160515	LongN
Q02218	2nd degree	0.0160515	LongT
P04003	2nd degree	0.0164021	LongT
P23229	2nd degree	0.0164021	ShortT
Q5VWQ8	2nd degree	0.0164021	LongT
Q8N6T3	2nd degree	0.0164021	ShortT
Q9UEE9	2nd degree	0.0164021	ShortN
O75489	2nd degree	0.0167594	LongN
P06865	2nd degree	0.0167594	ShortT
Q9BVG4	2nd degree	0.0167594	ShortT
P20962	2nd degree	0.0171234	LongN
Q6P179	2nd degree	0.0171234	ShortT
Q96AB3	2nd degree	0.0171234	LongN
Q9Y5Z4	2nd degree	0.0171234	LongN
P35611	2nd degree	0.0174945	ShortN
Q9NSE4	2nd degree	0.0174945	LongN
Q9Y4D8	2nd degree	0.0174945	LongN
O00391	2nd degree	0.0178725	ShortN
P62879	2nd degree	0.0178725	ShortT
Q7L5N7	2nd degree	0.0178725	LongN
B0I1T2	2nd degree	0.0182576	LongT
P04066	2nd degree	0.0182576	LongT
P61026	2nd degree	0.0182576	ShortN
Q02978	2nd degree	0.0182576	ShortT
P31943	2nd degree	0.0186501	LongT
P14384	2nd degree	0.0190498	LongT
P16150	2nd degree	0.0190498	LongT
P20645	2nd degree	0.0190498	LongT
P57088	2nd degree	0.0190498	LongT
P29508	2nd degree	0.019457	LongT
Q16555	2nd degree	0.019457	ShortT
Q96C86	2nd degree	0.019457	LongN
O43678	2nd degree	0.0202944	ShortN
P43007	2nd degree	0.0202944	ShortN
Q96CG8	2nd degree	0.0202944	LongT
O43379	2nd degree	0.0207247	ShortN
O75636	2nd degree	0.0207247	LongT
P19823	2nd degree	0.0207247	LongT
P28331	2nd degree	0.0207247	ShortN
P35527	2nd degree	0.0207247	LongT
Q5TDH0	2nd degree	0.0207247	ShortN
Q7Z7G0	2nd degree	0.0207247	LongT
Q99611	2nd degree	0.0207247	LongT
Q9NZM1	2nd degree	0.0207247	ShortT
O95865	2nd degree	0.0211629	LongN
P09110	2nd degree	0.0211629	ShortT
P50542	2nd degree	0.0211629	ShortT
P78386	2nd degree	0.0211629	LongT
Q1KMD3	2nd degree	0.0211629	LongT
P21291	2nd degree	0.0216092	ShortT
Q96K21	2nd degree	0.0216092	ShortN
Q9H267	2nd degree	0.0216092	LongT
P02763	2nd degree	0.0220637	LongT
P22897	2nd degree	0.0220637	LongT
Q8N335	2nd degree	0.0220637	LongN
Q9H008	2nd degree	0.0220637	ShortN
O95571	2nd degree	0.0225264	ShortN
P01591	2nd degree	0.0225264	LongT
P38117	2nd degree	0.0225264	LongN
Q08257	2nd degree	0.0225264	LongT
Q14116	2nd degree	0.0225264	LongT
Q5TCX8	2nd degree	0.0225264	LongT
Q8WTS6	2nd degree	0.0225264	ShortT
Q9NNW7	2nd degree	0.0225264	LongT
Q9P2R7	2nd degree	0.0225264	ShortN
Q9UBI1	2nd degree	0.0225264	ShortT
Q08380	2nd degree	0.0229975	LongT
Q09161	2nd degree	0.0229975	ShortN
Q12765	2nd degree	0.0229975	ShortN
Q13492	2nd degree	0.0229975	LongT
Q9H3K6	2nd degree	0.0229975	LongT
O95479	2nd degree	0.0234772	ShortN
Q16629	2nd degree	0.0234772	ShortT
Q53FA7	2nd degree	0.0234772	LongN
Q96HC4	2nd degree	0.0234772	ShortT
Q9NZA1	2nd degree	0.0234772	LongN
P42330	2nd degree	0.0239655	LongN
P56192	2nd degree	0.0239655	LongN
Q96A35	2nd degree	0.0239655	LongT
O75223	2nd degree	0.0244625	ShortT
P35612	2nd degree	0.0244625	ShortN
Q7Z7H5	2nd degree	0.0244625	LongT
Q86UX7	2nd degree	0.0244625	ShortN
Q9HAV0	2nd degree	0.0244625	LongT
Q9Y295	2nd degree	0.0244625	ShortT
Q9Y624	2nd degree	0.0244625	ShortT
O95436	2nd degree	0.0249685	LongT
Q92499	2nd degree	0.0249685	LongT
Q9NYF8	2nd degree	0.0249685	ShortN
O00754	2nd degree	0.0260076	LongT
P11279	2nd degree	0.0260076	LongT
Q5HYK3	2nd degree	0.0260076	LongN
Q9BXP5	2nd degree	0.0260076	ShortT
Q9H8Y8	2nd degree	0.0260076	LongT
O60637	2nd degree	0.026541	LongT
P49748	2nd degree	0.026541	ShortT
Q00765	2nd degree	0.026541	LongT
Q14315	2nd degree	0.026541	ShortN
Q9NZD2	2nd degree	0.026541	LongN
O43776	2nd degree	0.0270839	ShortN
P07858	2nd degree	0.0270839	ShortT
P13987	2nd degree	0.0270839	LongT
P19652	2nd degree	0.0270839	LongT
P28676	2nd degree	0.0270839	LongN
P46977	2nd degree	0.0270839	ShortN
P53621	2nd degree	0.0270839	LongT
P98088	2nd degree	0.0270839	ShortT
Q01085	2nd degree	0.0270839	ShortN
Q06787	2nd degree	0.0270839	LongT
Q13442	2nd degree	0.0270839	LongN
Q7KZF4	2nd degree	0.0270839	ShortT
Q8WYJ6	2nd degree	0.0270839	ShortT
Q96S53	2nd degree	0.0270839	LongN
Q9UPY3	2nd degree	0.0270839	LongT
O95159	2nd degree	0.0276362	ShortN
O60264	2nd degree	0.0281982	LongN
P07948	2nd degree	0.0281982	ShortT
Q3SY69	2nd degree	0.0281982	LongN
Q6PCE3	2nd degree	0.0281982	LongT
Q6UX71	2nd degree	0.0281982	ShortT
Q9Y5Q9	2nd degree	0.0281982	ShortN
Q9BTV4	2nd degree	0.0287701	ShortT
B9A064	2nd degree	0.0293518	ShortT
Q16650	2nd degree	0.0293518	ShortT
Q9Y371	2nd degree	0.0293518	ShortN
P15924	2nd degree	0.0299436	LongN
P35613	2nd degree	0.0299436	LongT
P61966	2nd degree	0.0299436	ShortN
Q04637	2nd degree	0.0299436	LongN
Q13595	2nd degree	0.0299436	LongT
Q16853	2nd degree	0.0299436	ShortT
Q58FF6	2nd degree	0.0299436	LongN
Q6UXN9	2nd degree	0.0299436	ShortT
Q96AT9	2nd degree	0.0299436	LongN
P02730	2nd degree	0.0305457	LongT
P43897	2nd degree	0.0305457	ShortT
Q10471	2nd degree	0.0305457	LongN
Q6P2Q9	2nd degree	0.0305457	ShortT
P17050	2nd degree	0.031158	ShortT
Q9HCD5	2nd degree	0.031158	LongN
Q9Y4L1	2nd degree	0.031158	ShortT
P24821	2nd degree	0.0317809	LongT
Q8N3D4	2nd degree	0.0317809	ShortN
Q9BRF8	2nd degree	0.0317809	ShortN
Q9Y3C8	2nd degree	0.0317809	LongN
P00918	2nd degree	0.0324144	ShortT
P63218	2nd degree	0.0324144	ShortN
Q14669	2nd degree	0.0324144	LongT
O94906	2nd degree	0.0330586	ShortN
O95163	2nd degree	0.0330586	LongT
P04114	2nd degree	0.0330586	ShortT
P29622	2nd degree	0.0330586	ShortT
P30520	2nd degree	0.0330586	ShortN
P63244	2nd degree	0.0330586	LongT
Q02818	2nd degree	0.0330586	LongN
Q9BVK6	2nd degree	0.0330586	ShortT
Q9NTJ5	2nd degree	0.0330586	LongT
Q9Y6A9	2nd degree	0.0330586	LongN
P62937	2nd degree	0.0337137	ShortN
Q6P4A8	2nd degree	0.0343798	ShortT
Q8IZD4	2nd degree	0.0343798	ShortT
Q9NX63	2nd degree	0.0343798	ShortN
O00151	2nd degree	0.0350571	LongN
O00584	2nd degree	0.0350571	LongN
O15143	2nd degree	0.0350571	ShortT
O95168	2nd degree	0.0350571	LongT
P01008	2nd degree	0.0350571	ShortT
P0C2W1	2nd degree	0.0350571	ShortT
P12081	2nd degree	0.0350571	ShortN
P13762	2nd degree	0.0350571	ShortT
P49590	2nd degree	0.0350571	LongN
P55196	2nd degree	0.0350571	ShortN
P61457	2nd degree	0.0350571	ShortN
Q13510	2nd degree	0.0350571	ShortT
Q6P1M3	2nd degree	0.0350571	LongT
Q9NSU2	2nd degree	0.0350571	LongN
Q9NYL9	2nd degree	0.0350571	LongN
Q9UHQ9	2nd degree	0.0350571	LongT
Q9UK45	2nd degree	0.0350571	LongN
Q9Y263	2nd degree	0.0350571	ShortT
Q9Y5B9	2nd degree	0.0350571	LongT
Q9ULA0	2nd degree	0.0357458	LongT
Q9UNN8	2nd degree	0.0357458	LongT
Q15113	2nd degree	0.0364459	LongT
O15498	2nd degree	0.0371576	ShortT
P02741	2nd degree	0.0371576	LongN
P35658	2nd degree	0.0371576	LongT
P49257	2nd degree	0.0371576	ShortT
Q96D46	2nd degree	0.0371576	LongN
Q9C0J8	2nd degree	0.0371576	ShortN
O95340	2nd degree	0.0378811	ShortN
P31327	2nd degree	0.0378811	LongN
Q92599	2nd degree	0.0378811	ShortT
Q9NTZ6	2nd degree	0.0378811	ShortT
Q9NZV1	2nd degree	0.0378811	ShortN
O75643	2nd degree	0.0386164	ShortT
P25205	2nd degree	0.0386164	ShortT
P54819	2nd degree	0.0386164	LongN
Q13907	2nd degree	0.0386164	LongN
Q14764	2nd degree	0.0386164	ShortT
Q9UJU6	2nd degree	0.0393638	ShortN
O15305	2nd degree	0.0408954	LongN
O60502	2nd degree	0.0408954	ShortN
O96000	2nd degree	0.0408954	LongN
P04843	2nd degree	0.0408954	LongT
P34096	2nd degree	0.0408954	ShortN
P49247	2nd degree	0.0408954	ShortN
Q16363	2nd degree	0.0408954	ShortN
Q96FJ2	2nd degree	0.0408954	ShortN
Q9NZW5	2nd degree	0.0408954	LongT
O43143	2nd degree	0.0416798	LongT
O43491	2nd degree	0.0416798	LongT
O75882	2nd degree	0.0416798	LongT
P04004	2nd degree	0.0416798	ShortT
P06396	2nd degree	0.0416798	ShortT
P46939	2nd degree	0.0416798	ShortT
Q13423	2nd degree	0.0416798	ShortN
Q15121	2nd degree	0.0416798	LongN
Q86Y82	2nd degree	0.0416798	LongN
Q8IWB7	2nd degree	0.0416798	ShortT
Q96CX2	2nd degree	0.0416798	LongT
O43598	2nd degree	0.0424769	LongN
P00505	2nd degree	0.0424769	ShortN
P08195	2nd degree	0.0424769	ShortT
P08729	2nd degree	0.0424769	ShortT
P14406	2nd degree	0.0424769	LongT
P51991	2nd degree	0.0424769	ShortT
P61011	2nd degree	0.0424769	LongN
Q02543	2nd degree	0.0424769	LongT
Q99715	2nd degree	0.0424769	ShortN
O14880	2nd degree	0.0432868	LongN
P00352	2nd degree	0.0432868	ShortT
P02511	2nd degree	0.0432868	LongN
P16152	2nd degree	0.0432868	ShortN
P23526	2nd degree	0.0432868	ShortT
P55008	2nd degree	0.0432868	LongN
P61160	2nd degree	0.0432868	LongN
Q8TD06	2nd degree	0.0432868	LongN
O76094	2nd degree	0.0441096	ShortN
P05062	2nd degree	0.0441096	LongT
P22748	2nd degree	0.0441096	LongT
P36222	2nd degree	0.0441096	ShortT
Q14554	2nd degree	0.0441096	LongN
Q15427	2nd degree	0.0441096	ShortN
Q5T4S7	2nd degree	0.0441096	LongT
Q9Y3E1	2nd degree	0.0441096	LongT
O15144	2nd degree	0.0449455	LongN
P31629	2nd degree	0.0449455	ShortT
Q13740	2nd degree	0.0449455	ShortT
Q8WVM8	2nd degree	0.0449455	LongN
O75569	2nd degree	0.0457946	LongT
P08637	2nd degree	0.0457946	LongT
Q00013	2nd degree	0.0457946	ShortT
Q6NUK1	2nd degree	0.0457946	LongN
Q99873	2nd degree	0.0457946	ShortN
Q9NRN7	2nd degree	0.0457946	LongN
Q9Y618	2nd degree	0.0457946	LongT
O75438	2nd degree	0.0466572	ShortN
P51687	2nd degree	0.0466572	ShortT
Q8WVX9	2nd degree	0.0466572	ShortN
Q9Y547	2nd degree	0.0466572	LongN
P36871	2nd degree	0.0475333	ShortN
P49005	2nd degree	0.0475333	ShortT
Q07866	2nd degree	0.0475333	ShortT
Q9H1Z4	2nd degree	0.0475333	ShortT
Q9Y3B3	2nd degree	0.0475333	ShortT
O14579	2nd degree	0.0484231	LongN
P30566	2nd degree	0.0484231	LongN
P49006	2nd degree	0.0484231	ShortT
P63010	2nd degree	0.0484231	LongN
Q15365	2nd degree	0.0484231	LongT
Q53H82	2nd degree	0.0484231	ShortN
Q96C19	2nd degree	0.0484231	LongN
Q9HAU5	2nd degree	0.0484231	ShortT
Q9Y2Y8	2nd degree	0.0484231	LongT
P25398	2nd degree	0.0493268	LongN
P26885	2nd degree	0.0493268	ShortT
Q06278	2nd degree	0.0493268	ShortN
Q16181	2nd degree	0.0493268	ShortN
Q96RP9	2nd degree	0.0493268	ShortN
O96009	2nd degree
P62826	2nd degree
P80748	NA -putative interactor	0.000340892	ShortT
P04433	NA -putative interactor	0.000580376	LongT
P01781	NA -putative interactor	0.00108476	ShortT
P01743	NA -putative interactor	0.00299548	LongT
P50440	NA -putative interactor	0.00323429	ShortN
P01714	NA -putative interactor	0.00459532	LongT
P18136	NA -putative interactor	0.00545477	ShortT
P01613	NA -putative interactor	0.00661301	LongT
P01776	NA -putative interactor	0.00677238	ShortT
P01880	NA -putative interactor	0.00677238	LongT
P01601	NA -putative interactor	0.00693519	LongT
P01763	NA -putative interactor	0.00693519	LongN
P04206	NA -putative interactor	0.00693519	LongT
P15144	NA -putative interactor	0.00693519	LongT
P04220	NA -putative interactor	0.00744498	ShortT
P01612	NA -putative interactor	0.00798817	ShortT
P04431	NA -putative interactor	0.0089728	LongN
Q96PD5	NA -putative interactor	0.0089728	LongT
P01717	NA -putative interactor	0.00918228	LongT
P01767	NA -putative interactor	0.00961438	ShortT
P49961	NA -putative interactor	0.00961438	LongT
P06331	NA -putative interactor	0.0115298	ShortT
A0M8Q6	NA -putative interactor	0.0131815	LongT
P00326	NA -putative interactor	0.0137768	ShortT
P01771	NA -putative interactor	0.0157076	ShortT
Q96C23	NA -putative interactor	0.0157076	ShortT
Q9NVG8	NA -putative interactor	0.0160515	LongN
P19224	NA -putative interactor	0.0167594	LongT
Q5SYB0	NA -putative interactor	0.0174945	ShortT
P01610	NA -putative interactor	0.0207247	LongN
P04430	NA -putative interactor	0.0216092	LongT
Q17RC7	NA -putative interactor	0.0225264	ShortN
A6NMZ7	NA -putative interactor	0.0239655	LongT
Q29960	NA -putative interactor	0.0244625	ShortN
Q9UNW9	NA -putative interactor	0.0249685	LongT
P09105	NA -putative interactor	0.0299436	ShortT
P56470	NA -putative interactor	0.0317809	LongT
P01611	NA -putative interactor	0.0350571	ShortT
P17213	NA -putative interactor	0.0378811	LongT
Q12864	NA -putative interactor	0.0386164	LongN
Q8N0W3	NA -putative interactor	0.0424769	ShortN
P01621	NA -putative interactor	0.0449455	ShortT
Q13938	NA -putative interactor	0.0484231	LongN
P08107	NA -putative interactor	0.0493268	ShortN
Q99541	NA -putative interactor	0.0493268	ShortN
