# Supplementary material for: Depletion-dependent activity-based protein profiling using SWATH/DIA-MS detects serine hydrolase lipid remodeling in lung adenocarcinoma progression
Source: Nat Commun. 2025 May 27;16:4889. doi: 10.1038/s41467-025-59564-x (PMC12117057; doi:10.1038/s41467-025-59564-x)
Supplement: Supplementary file 10 — Supplementary Data 7 [file 41467_2025_59564_MOESM10_ESM.xlsx]

## Sheet: Description
	Sheet	Column	Description
	(Fig. 5b) The binary enzyme:protein interactions across co-depleted proteome based on canonical correlation analysis (CCA) via DIABOLO data integration tool. The 55 binary interactions with experimental evidence are annotated in the Integrated Interactions Database: http://iid.ophid.utoronto.ca/	Input data1:	64 SHs-selected in PLS-DA
		Input data2:	388 co-depleted proteins (2-sided KS-test<0.01)
		Output: 55 interaction with experimental evidence in source data.
			Output: 3798 mutual correlations (CCA>0.4, P<0.05 Cor. test) out of 24'832 combinations. Of them, 55 interactions are experimentaly confirmed

## Sheet: Data
Input data1:	Input data2:
64 SHs-selected in PLS-DA	388 co-depleted proteins (2-sided KS-test<0.01)
SIAE	A2RRP1
HP	A4D1P6
PLD3	O00115
PREP	O00487
CD163	O00592
DDX39A	O14618
LTF	O14672
DPP4	O14744
CFB	O14980
FASN	O15247
ELANE	O15533
C7	O43169
F9	O43396
PRCP	O43747
CLPP	O43795
PSMB9	O43809
MST1	O43847
SCPEP1	O60341
CD5L	O60518
CFI	O60568
CTSA	O60664
TPP1	O75083
PLG	O75351
LPA	O75475
DPP9	O75695
H1.4	O75821
F2	O94760
CES1	O94788
CTSH	O94855
ABHD12	O95302
FAAH2	O95352
ABHD16A	O95373
IAH1	O95433
LYPLA2	O95757
ACACA	O95793
ABHD10	O95834
F12	O95881
PSMA6	O96009
F11	P00325
PAFAH1B3	P00441
CD109	P00450
AZU1	P00519
CMA1	P01011
NDRG2	P01023
C2	P01024
ST14	P01031
PAFAH1B2	P01033
ACOT1	P01042
DMBT1	P01601
FAP	P01612
CPVL	P01613
PAFAH1B1	P01619
LYPLAL1	P01714
RNASE3	P01717
C1S	P01743
FBP1	P01763
HABP2	P01767
TPP2	P01776
KLKB1	P01781
EFEMP1	P01857
C1RL	P01859
C1R	P01860
F13A1	P01861
LIPA	P01871
	P01876
	P01877
	P01880
	P02549
	P02671
	P02679
	P02743
	P02746
	P02750
	P02751
	P02765
	P02790
	P04062
	P04196
	P04206
	P04211
	P04217
	P04220
	P04264
	P04275
	P04350
	P04431
	P04433
	P04844
	P05091
	P05107
	P05154
	P05155
	P05165
	P05166
	P05362
	P05556
	P06280
	P07225
	P07360
	P07711
	P07942
	P08134
	P08174
	P08185
	P08514
	P08567
	P08572
	P08754
	P09972
	P0C0L5
	P0CG39
	P10109
	P10253
	P10606
	P10909
	P11047
	P11117
	P11277
	P11310
	P11678
	P11766
	P12109
	P12110
	P12694
	P12830
	P13611
	P13645
	P13647
	P13686
	P13760
	P14136
	P14543
	P14780
	P15104
	P15144
	P15153
	P15848
	P16219
	P16284
	P16435
	P16452
	P17812
	P17858
	P18136
	P18428
	P19827
	P20700
	P20702
	P20933
	P21333
	P21397
	P21399
	P22234
	P22792
	P23083
	P23786
	P24928
	P25311
	P25774
	P27169
	P27694
	P28161
	P29350
	P29466
	P29966
	P30047
	P31153
	P31483
	P31930
	P33316
	P34932
	P35442
	P35606
	P35625
	P35749
	P35858
	P35908
	P36404
	P36551
	P36969
	P40199
	P40261
	P40429
	P41091
	P42566
	P46063
	P48637
	P49023
	P49406
	P49407
	P49458
	P49591
	P49755
	P49915
	P49961
	P50440
	P50552
	P50851
	P51153
	P51570
	P51610
	P51884
	P52789
	P53634
	P53680
	P53992
	P54687
	P55083
	P55259
	P55884
	P56134
	P56199
	P61225
	P61586
	P61916
	P61962
	P62330
	P62333
	P62633
	P62826
	P62873
	P62899
	P68371
	P69905
	P78310
	P78406
	P80511
	P80748
	P83881
	P84095
	P98082
	Q01581
	Q04206
	Q04446
	Q04837
	Q05048
	Q05707
	Q06033
	Q08209
	Q0VDF9
	Q10588
	Q10589
	Q13045
	Q13098
	Q13151
	Q13162
	Q13247
	Q13308
	Q13310
	Q13409
	Q13421
	Q13428
	Q13488
	Q13547
	Q13724
	Q14126
	Q14165
	Q14232
	Q14677
	Q14767
	Q15075
	Q15165
	Q15185
	Q15366
	Q15393
	Q15691
	Q15833
	Q15904
	Q16222
	Q16531
	Q16658
	Q16706
	Q16719
	Q16831
	Q2TAY7
	Q30154
	Q5SY16
	Q63HN8
	Q6P1K2
	Q6P2E9
	Q6PCB0
	Q6UX06
	Q6ZRS2
	Q709C8
	Q7L266
	Q7L5N1
	Q7Z2W4
	Q7Z406
	Q86X55
	Q8IUI8
	Q8N183
	Q8N684
	Q8NBJ5
	Q8NBJ7
	Q8NEZ5
	Q8NF50
	Q8NFC6
	Q8NFW8
	Q8TAT6
	Q8TCT9
	Q8WVY7
	Q8WWI1
	Q92542
	Q92544
	Q92688
	Q92692
	Q92696
	Q92747
	Q92769
	Q92945
	Q92973
	Q969T9
	Q969X5
	Q96AY3
	Q96CN7
	Q96CW1
	Q96IY4
	Q96JH7
	Q96K76
	Q96PD5
	Q96TC7
	Q99447
	Q99538
	Q9BPW8
	Q9BQE3
	Q9BQG0
	Q9BR76
	Q9BRP4
	Q9BRP8
	Q9BS40
	Q9BSV6
	Q9BUH6
	Q9BXB4
	Q9BXS5
	Q9BY32
	Q9BY67
	Q9BYT8
	Q9C037
	Q9C0C9
	Q9GZZ9
	Q9H0B6
	Q9H0E2
	Q9H0R5
	Q9H0U3
	Q9H0U4
	Q9H0W9
	Q9H307
	Q9H3H3
	Q9H477
	Q9H4G4
	Q9H6S3
	Q9HCN8
	Q9NPD8
	Q9NPF4
	Q9NR30
	Q9NRP0
	Q9NV31
	Q9NVN3
	Q9NY15
	Q9NY65
	Q9P016
	Q9P035
	Q9P246
	Q9P258
	Q9P2R3
	Q9UBB4
	Q9UBG0
	Q9UBR2
	Q9UBS4
	Q9UBU9
	Q9UBX5
	Q9UFN0
	Q9UGI8
	Q9UHD1
	Q9UHG3
	Q9UHR5
	Q9UJS0
	Q9UKK3
	Q9UKU7
	Q9ULT8
	Q9UMS4
	Q9UNE7
	Q9UNM6
	Q9UPU5
	Q9Y2A7
	Q9Y2D5
	Q9Y2J2
	Q9Y2S2

## Sheet: 3798 correlations
Output: 3798 mutual correlations (CCA >0.4, P<0.05) out of 24'832 combinations.
Binary correlations	CCA (weight)
P04217 (correlates with) LTF	-0.885996
P05155 (correlates with) LTF	-0.878789
P04217 (correlates with) CFB	-0.873045
P01860 (correlates with) LTF	-0.872724
P02743 (correlates with) LTF	-0.86981
P05155 (correlates with) CFB	-0.867077
O75083 (correlates with) LTF	-0.866523
P01860 (correlates with) CFB	-0.861579
P04217 (correlates with) FASN	-0.861133
O75083 (correlates with) CFB	-0.859942
P02743 (correlates with) CFB	-0.85604
P02679 (correlates with) LTF	-0.853368
P05155 (correlates with) FASN	-0.853067
P00441 (correlates with) LTF	-0.852948
P01860 (correlates with) FASN	-0.846428
P02743 (correlates with) FASN	-0.846379
P01024 (correlates with) LTF	-0.845629
P02679 (correlates with) CFB	-0.844186
P01859 (correlates with) LTF	-0.840927
P51884 (correlates with) LTF	-0.839617
P00441 (correlates with) CFB	-0.83841
O75083 (correlates with) FASN	-0.836161
P02790 (correlates with) LTF	-0.835169
P01024 (correlates with) CFB	-0.833491
P01859 (correlates with) CFB	-0.832495
P00441 (correlates with) FASN	-0.830919
P04217 (correlates with) CTSH	-0.830231
P51884 (correlates with) CFB	-0.828999
P02679 (correlates with) FASN	-0.82648
P01857 (correlates with) LTF	-0.826195
P02790 (correlates with) CFB	-0.82584
P04217 (correlates with) F13A1	-0.823822
P01024 (correlates with) FASN	-0.822184
P05155 (correlates with) CTSH	-0.820361
Q9P246 (correlates with) LTF	-0.820108
P01714 (correlates with) LTF	-0.819436
O75083 (correlates with) HP	-0.81895
P02743 (correlates with) CTSH	-0.817928
Q9P246 (correlates with) CFB	-0.815345
P01857 (correlates with) CFB	-0.814603
P51884 (correlates with) FASN	-0.814064
P01011 (correlates with) LTF	-0.813625
P05155 (correlates with) F13A1	-0.813455
P01859 (correlates with) FASN	-0.813106
P01860 (correlates with) CTSH	-0.812342
P01860 (correlates with) HP	-0.812192
P02743 (correlates with) F13A1	-0.811942
P00325 (correlates with) LTF	-0.810219
P04217 (correlates with) HP	-0.809596
P02790 (correlates with) FASN	-0.809235
Q9P246 (correlates with) HP	-0.808632
P05091 (correlates with) LTF	-0.806244
P01023 (correlates with) LTF	-0.805845
P05155 (correlates with) HP	-0.805728
P01011 (correlates with) CFB	-0.805112
P00441 (correlates with) CTSH	-0.804843
P01023 (correlates with) CFB	-0.80423
P01714 (correlates with) CFB	-0.804201
P01857 (correlates with) FASN	-0.802841
P01860 (correlates with) F13A1	-0.800411
P01859 (correlates with) HP	-0.799895
P00325 (correlates with) CFB	-0.799788
P00441 (correlates with) F13A1	-0.799119
P01714 (correlates with) FASN	-0.79891
P01877 (correlates with) LTF	-0.797793
P05091 (correlates with) CFB	-0.796717
P19827 (correlates with) F13A1	-0.796529
P01023 (correlates with) HP	-0.795617
P01871 (correlates with) LTF	-0.795617
P01024 (correlates with) F13A1	-0.795354
O75083 (correlates with) CTSH	-0.79406
P01024 (correlates with) CTSH	-0.793498
P02743 (correlates with) HP	-0.792734
P21333 (correlates with) CFB	-0.792284
P50552 (correlates with) LTF	-0.791865
P21333 (correlates with) LTF	-0.791671
P02679 (correlates with) CTSH	-0.791102
Q9P246 (correlates with) FASN	-0.789183
P01871 (correlates with) CFB	-0.789023
P51884 (correlates with) HP	-0.787399
P01011 (correlates with) FASN	-0.787203
P00325 (correlates with) FASN	-0.786353
P04217 (correlates with) F2	-0.786261
P02679 (correlates with) F13A1	-0.785731
P01877 (correlates with) CFB	-0.785002
P21333 (correlates with) HP	-0.784371
P02679 (correlates with) HP	-0.782295
P05091 (correlates with) FASN	-0.781642
O96009 (correlates with) LTF	-0.780789
P51884 (correlates with) CTSH	-0.780696
P02765 (correlates with) LTF	-0.779741
O75083 (correlates with) F13A1	-0.779253
P04217 (correlates with) PLG	-0.779006
P05155 (correlates with) F2	-0.778223
P50552 (correlates with) CFB	-0.777879
O96009 (correlates with) CFB	-0.777058
P00441 (correlates with) HP	-0.77568
P19827 (correlates with) LTF	-0.77555
P02790 (correlates with) CTSH	-0.775377
P01877 (correlates with) FASN	-0.775336
P01859 (correlates with) CTSH	-0.775289
P01714 (correlates with) CTSH	-0.774803
P01857 (correlates with) CTSH	-0.773848
P19827 (correlates with) CTSH	-0.773605
P02743 (correlates with) F2	-0.772973
P01023 (correlates with) FASN	-0.772755
P01857 (correlates with) F13A1	-0.772324
P50552 (correlates with) FASN	-0.771506
P02790 (correlates with) F13A1	-0.771235
P02743 (correlates with) PLG	-0.769762
P19827 (correlates with) FASN	-0.769524
P01024 (correlates with) F2	-0.768041
P01871 (correlates with) FASN	-0.767856
P01877 (correlates with) HP	-0.767829
P05155 (correlates with) PLG	-0.767473
P01011 (correlates with) HP	-0.76711
P51884 (correlates with) F13A1	-0.766599
P02765 (correlates with) FASN	-0.766148
P02765 (correlates with) F13A1	-0.766133
P01871 (correlates with) HP	-0.765339
P01876 (correlates with) LTF	-0.764516
P01860 (correlates with) PLG	-0.763291
P02790 (correlates with) HP	-0.76266
P01714 (correlates with) HP	-0.762476
P02671 (correlates with) LTF	-0.762094
P01860 (correlates with) F2	-0.761419
P11766 (correlates with) LTF	-0.760924
P01714 (correlates with) F13A1	-0.760871
P01876 (correlates with) CFB	-0.760573
P02765 (correlates with) CFB	-0.760315
P00441 (correlates with) PLG	-0.759828
P04217 (correlates with) CFI	-0.759118
P00441 (correlates with) F2	-0.758702
P02679 (correlates with) F2	-0.75785
O96009 (correlates with) HP	-0.757803
P01859 (correlates with) F13A1	-0.757438
P19827 (correlates with) F2	-0.757335
P21333 (correlates with) FASN	-0.757171
P00325 (correlates with) CTSH	-0.756011
O75083 (correlates with) PLD3	-0.755419
P02765 (correlates with) CTSH	-0.755392
P01024 (correlates with) HP	-0.7551
P61916 (correlates with) LTF	-0.754608
P05155 (correlates with) CFI	-0.75361
P10909 (correlates with) LTF	-0.752914
P00325 (correlates with) F13A1	-0.752658
P01011 (correlates with) CTSH	-0.751656
O96009 (correlates with) FASN	-0.750973
P05091 (correlates with) CTSH	-0.749768
P01860 (correlates with) PLD3	-0.749125
P19827 (correlates with) CFB	-0.748796
P02671 (correlates with) CFB	-0.748771
Q9P246 (correlates with) PLD3	-0.748162
P01860 (correlates with) CFI	-0.747974
O75083 (correlates with) F2	-0.747755
P50552 (correlates with) CTSH	-0.747284
P01877 (correlates with) CTSH	-0.746787
P04217 (correlates with) PLD3	-0.745918
P11766 (correlates with) FASN	-0.745619
P01857 (correlates with) HP	-0.745589
O75083 (correlates with) CFI	-0.74518
P05091 (correlates with) F13A1	-0.745132
Q9P246 (correlates with) CTSH	-0.744673
P02743 (correlates with) CFI	-0.744598
P05362 (correlates with) LTF	-0.74446
P02790 (correlates with) F2	-0.744289
P11766 (correlates with) CFB	-0.743567
P01857 (correlates with) F2	-0.742888
P02671 (correlates with) FASN	-0.742415
P05155 (correlates with) PLD3	-0.742338
P01714 (correlates with) PLG	-0.74205
P01877 (correlates with) TPP1	-0.741758
P61916 (correlates with) CFB	-0.738694
P01859 (correlates with) PLD3	-0.738641
P61916 (correlates with) FASN	-0.738238
P19827 (correlates with) PLG	-0.738042
P10909 (correlates with) FASN	-0.737975
O75083 (correlates with) PLG	-0.737839
P01011 (correlates with) F13A1	-0.737212
P05091 (correlates with) HP	-0.736994
P01024 (correlates with) PLG	-0.736906
P05362 (correlates with) CFB	-0.736623
P00325 (correlates with) HP	-0.736573
P01876 (correlates with) FASN	-0.736316
P50552 (correlates with) F13A1	-0.736187
P51884 (correlates with) PLG	-0.735633
P01023 (correlates with) PLD3	-0.735587
P10909 (correlates with) CFB	-0.735583
P02679 (correlates with) PLG	-0.733557
P02679 (correlates with) CFI	-0.733456
P01714 (correlates with) TPP1	-0.733429
P12110 (correlates with) LTF	-0.732579
P50552 (correlates with) HP	-0.732473
P11766 (correlates with) F13A1	-0.731766
P02765 (correlates with) F2	-0.731321
P11766 (correlates with) CTSH	-0.730894
P02743 (correlates with) PLD3	-0.730433
P00441 (correlates with) CFI	-0.729502
P01871 (correlates with) CTSH	-0.729218
P01859 (correlates with) PLG	-0.728518
P01860 (correlates with) TPP1	-0.727003
P51884 (correlates with) PLD3	-0.726695
P51884 (correlates with) F2	-0.726685
P04217 (correlates with) TPP1	-0.726511
P01024 (correlates with) CFI	-0.725867
P10909 (correlates with) F13A1	-0.725721
P21333 (correlates with) PLD3	-0.724954
P00325 (correlates with) F2	-0.724048
P01023 (correlates with) CTSH	-0.723879
P10909 (correlates with) CTSH	-0.723831
P01877 (correlates with) F13A1	-0.723062
P61916 (correlates with) F13A1	-0.721984
Q9NVN3 (correlates with) LTF	-0.721983
P61916 (correlates with) CTSH	-0.721341
P01859 (correlates with) CFI	-0.721299
P01857 (correlates with) PLG	-0.720959
P05362 (correlates with) FASN	-0.720564
P02743 (correlates with) TPP1	-0.720517
P12110 (correlates with) CFB	-0.72039
P02679 (correlates with) PLD3	-0.720302
P01877 (correlates with) PLG	-0.71943
P51884 (correlates with) CFI	-0.719278
P02671 (correlates with) CTSH	-0.71896
P02790 (correlates with) PLG	-0.718834
P01859 (correlates with) F2	-0.718713
P01042 (correlates with) LTF	-0.718184
P02790 (correlates with) CFI	-0.717754
P05091 (correlates with) F2	-0.717294
Q96CW1 (correlates with) LTF	-0.71717
Q9P246 (correlates with) F13A1	-0.716573
P19827 (correlates with) TPP2	-0.715888
P00441 (correlates with) PLD3	-0.714796
P01876 (correlates with) HP	-0.714714
P00441 (correlates with) TPP1	-0.714342
P02765 (correlates with) PLG	-0.713768
P05155 (correlates with) TPP1	-0.713758
Q9NVN3 (correlates with) CFB	-0.713661
P68371 (correlates with) LTF	-0.713601
P12110 (correlates with) FASN	-0.713534
P53680 (correlates with) HP	-0.713386
P10253 (correlates with) LTF	-0.71195
P50552 (correlates with) PLG	-0.711824
P01714 (correlates with) F2	-0.710662
P01877 (correlates with) PLD3	-0.710659
Q9P246 (correlates with) TPP1	-0.710316
P51884 (correlates with) TPP1	-0.710005
P01859 (correlates with) TPP1	-0.709434
P01871 (correlates with) F13A1	-0.709331
P02671 (correlates with) F13A1	-0.708932
P01857 (correlates with) CFI	-0.708865
Q92747 (correlates with) LTF	-0.70866
O96009 (correlates with) CTSH	-0.708073
P01011 (correlates with) PLD3	-0.707925
O75369 (correlates with) LTF	-0.707912
P01871 (correlates with) PLD3	-0.707097
P01042 (correlates with) CFB	-0.706107
P04217 (correlates with) TPP2	-0.706015
Q96CW1 (correlates with) CFB	-0.705522
P21333 (correlates with) CTSH	-0.705333
P01011 (correlates with) PLG	-0.704658
P01714 (correlates with) PLD3	-0.704212
Q9P246 (correlates with) CFI	-0.704133
P00325 (correlates with) PLG	-0.703693
P02671 (correlates with) HP	-0.703653
P53680 (correlates with) LTF	-0.702377
P02790 (correlates with) PLD3	-0.702062
P01011 (correlates with) F2	-0.701785
Q9NVN3 (correlates with) FASN	-0.701308
Q9P246 (correlates with) PLG	-0.700846
O96009 (correlates with) PLD3	-0.70009
P01042 (correlates with) FASN	-0.70006
P68371 (correlates with) CFB	-0.699994
P01714 (correlates with) CFI	-0.698747
Q9NVN3 (correlates with) F2	-0.698458
O75083 (correlates with) TPP1	-0.698184
P01011 (correlates with) CFI	-0.698067
Q9UMS4 (correlates with) LTF	-0.69804
P10253 (correlates with) CFB	-0.697851
P01023 (correlates with) F13A1	-0.69759
Q92747 (correlates with) CFB	-0.69757
O75369 (correlates with) CFB	-0.697498
P05155 (correlates with) TPP2	-0.697451
P53680 (correlates with) CFB	-0.697429
Q9NVN3 (correlates with) F13A1	-0.697386
Q96CW1 (correlates with) FASN	-0.697312
P68371 (correlates with) FASN	-0.69728
P05091 (correlates with) PLG	-0.696942
P01876 (correlates with) CTSH	-0.696612
P01024 (correlates with) TPP2	-0.696107
P10253 (correlates with) FASN	-0.696009
P00325 (correlates with) CFI	-0.695499
P11766 (correlates with) PLG	-0.695307
P02743 (correlates with) TPP2	-0.69517
P01024 (correlates with) PLD3	-0.694305
P01023 (correlates with) CFI	-0.694108
P05362 (correlates with) HP	-0.693102
P05091 (correlates with) CFI	-0.692456
P50552 (correlates with) TPP1	-0.692421
Q9BR76 (correlates with) LTF	-0.69238
P11766 (correlates with) F2	-0.691756
P50552 (correlates with) F2	-0.691725
P12110 (correlates with) CTSH	-0.690976
Q92747 (correlates with) FASN	-0.689005
P05362 (correlates with) CTSH	-0.688705
P12110 (correlates with) F13A1	-0.688445
P68371 (correlates with) F13A1	-0.688222
P01876 (correlates with) F13A1	-0.688123
O75369 (correlates with) FASN	-0.688119
P10909 (correlates with) PLG	-0.688048
P01861 (correlates with) LTF	-0.68764
O96009 (correlates with) F13A1	-0.687161
P10909 (correlates with) F2	-0.68681
Q05707 (correlates with) LTF	-0.686718
P01857 (correlates with) PLD3	-0.686127
Q9UMS4 (correlates with) CFB	-0.685659
P10253 (correlates with) F13A1	-0.685376
P61916 (correlates with) F2	-0.685033
Q9BR76 (correlates with) F13A1	-0.684565
P01871 (correlates with) PLG	-0.684528
P02671 (correlates with) PLG	-0.683933
P01042 (correlates with) F13A1	-0.683812
Q05707 (correlates with) F13A1	-0.683415
P21333 (correlates with) CFI	-0.683361
P61916 (correlates with) PLG	-0.683301
P00441 (correlates with) TPP2	-0.683269
P25774 (correlates with) LTF	-0.683219
P01871 (correlates with) CFI	-0.682901
Q96CW1 (correlates with) HP	-0.682874
O43396 (correlates with) LTF	-0.682406
P28065 (correlates with) LTF	-0.681264
P01877 (correlates with) CFI	-0.680126
Q9UMS4 (correlates with) FASN	-0.680112
P68371 (correlates with) CTSH	-0.679939
Q9BR76 (correlates with) CFB	-0.679848
P21333 (correlates with) F13A1	-0.679566
P05362 (correlates with) F13A1	-0.679379
P10253 (correlates with) CTSH	-0.679293
P01042 (correlates with) CTSH	-0.679226
P05091 (correlates with) PLD3	-0.678598
P02679 (correlates with) TPP2	-0.678581
Q9BR76 (correlates with) F2	-0.678338
Q92688 (correlates with) LTF	-0.678146
P00325 (correlates with) PLD3	-0.678066
P01860 (correlates with) TPP2	-0.677773
P01861 (correlates with) FASN	-0.67728
P01011 (correlates with) TPP1	-0.676956
Q05707 (correlates with) FASN	-0.676914
Q9BR76 (correlates with) FASN	-0.67687
P02765 (correlates with) TPP2	-0.676615
P05556 (correlates with) LTF	-0.676327
Q9NVN3 (correlates with) CTSH	-0.676198
P53680 (correlates with) FASN	-0.676083
P50552 (correlates with) CFI	-0.676075
P50552 (correlates with) PLD3	-0.676028
Q9P246 (correlates with) F2	-0.675904
P04217 (correlates with) C2	-0.674474
P28065 (correlates with) CFB	-0.674444
P04196 (correlates with) LTF	-0.674045
P01871 (correlates with) TPP1	-0.673008
P01871 (correlates with) F2	-0.672819
P11766 (correlates with) HP	-0.672817
P01023 (correlates with) PLG	-0.672657
P25774 (correlates with) FASN	-0.67248
Q96CW1 (correlates with) CTSH	-0.672387
P25311 (correlates with) LTF	-0.671936
O96009 (correlates with) CFI	-0.671775
Q05707 (correlates with) CTSH	-0.671674
O43396 (correlates with) CFB	-0.67062
P01861 (correlates with) CTSH	-0.67059
P04217 (correlates with) DPP9	-0.670411
P01857 (correlates with) TPP2	-0.670389
P01861 (correlates with) F13A1	-0.670167
Q92688 (correlates with) CFB	-0.669981
P25311 (correlates with) CFB	-0.669774
P61916 (correlates with) HP	-0.669434
P02679 (correlates with) TPP1	-0.6694
P01876 (correlates with) F2	-0.669178
P01860 (correlates with) C2	-0.668814
P25774 (correlates with) F13A1	-0.668806
P01877 (correlates with) F2	-0.668585
P02743 (correlates with) C2	-0.668503
P01861 (correlates with) CFB	-0.668052
P01714 (correlates with) C2	-0.667939
P02790 (correlates with) TPP2	-0.667641
Q05707 (correlates with) CFB	-0.667375
P01023 (correlates with) TPP1	-0.667194
P02671 (correlates with) F2	-0.667112
P01023 (correlates with) F2	-0.665932
P80748 (correlates with) TPP1	-0.665395
P02765 (correlates with) CFI	-0.665219
P02765 (correlates with) HP	-0.665198
P25774 (correlates with) CTSH	-0.665114
O43396 (correlates with) FASN	-0.665002
P12830 (correlates with) LTF	-0.664635
P25774 (correlates with) CFB	-0.664523
Q92747 (correlates with) CTSH	-0.664498
P68371 (correlates with) F2	-0.664291
P01877 (correlates with) C2	-0.664282
O75369 (correlates with) CTSH	-0.663573
P05155 (correlates with) DPP9	-0.663277
P10909 (correlates with) HP	-0.663224
P04196 (correlates with) FASN	-0.663143
P05556 (correlates with) CFB	-0.662915
P05155 (correlates with) C2	-0.662781
Q92747 (correlates with) HP	-0.662536
P02671 (correlates with) TPP1	-0.66242
P00441 (correlates with) C2	-0.662181
P53680 (correlates with) PLD3	-0.66174
P12110 (correlates with) HP	-0.661253
Q9BR76 (correlates with) CTSH	-0.661176
P05556 (correlates with) FASN	-0.660388
P28065 (correlates with) FASN	-0.660357
Q16531 (correlates with) LTF	-0.659919
Q9P246 (correlates with) CD163	-0.659889
P01042 (correlates with) F2	-0.659629
O75083 (correlates with) TPP2	-0.659555
P02743 (correlates with) DPP9	-0.65953
P01876 (correlates with) CFI	-0.659369
O96009 (correlates with) PLG	-0.659251
O75083 (correlates with) F9	-0.65888
Q9UMS4 (correlates with) CTSH	-0.658782
O75369 (correlates with) F13A1	-0.658647
P19827 (correlates with) CFI	-0.65856
Q92688 (correlates with) FASN	-0.658448
P01876 (correlates with) PLD3	-0.658302
P02750 (correlates with) LTF	-0.658276
P53680 (correlates with) TPP1	-0.65816
P10253 (correlates with) F2	-0.658113
P12830 (correlates with) CFB	-0.657773
P12110 (correlates with) F2	-0.65681
P01024 (correlates with) TPP1	-0.656799
O96009 (correlates with) F2	-0.656153
Q92542 (correlates with) LTF	-0.656129
Q16658 (correlates with) LTF	-0.655604
P04196 (correlates with) CFB	-0.655002
P04196 (correlates with) CTSH	-0.654829
P02750 (correlates with) CFB	-0.654584
Q16658 (correlates with) F13A1	-0.654326
Q96CW1 (correlates with) F13A1	-0.65425
P04217 (correlates with) F9	-0.654145
Q96CW1 (correlates with) TPP1	-0.654089
P01857 (correlates with) TPP1	-0.654082
P08185 (correlates with) LTF	-0.653686
P21333 (correlates with) F2	-0.653527
P01860 (correlates with) DPP9	-0.65322
P02790 (correlates with) TPP1	-0.653065
P05155 (correlates with) F9	-0.653057
P04217 (correlates with) EFEMP1	-0.652688
Q99538 (correlates with) LTF	-0.65262
Q92747 (correlates with) F13A1	-0.65227
P25311 (correlates with) HP	-0.651689
P04196 (correlates with) TPP1	-0.651303
P01877 (correlates with) CD163	-0.651206
P00325 (correlates with) TPP2	-0.651126
P02671 (correlates with) CFI	-0.650846
P05362 (correlates with) F2	-0.650774
P20702 (correlates with) LTF	-0.650052
Q05707 (correlates with) F2	-0.649972
P21333 (correlates with) PLG	-0.64996
P51884 (correlates with) C2	-0.649919
P12110 (correlates with) PLG	-0.649485
P27694 (correlates with) LTF	-0.649426
P02671 (correlates with) PLD3	-0.649305
P11766 (correlates with) CFI	-0.648791
Q9UMS4 (correlates with) F13A1	-0.648547
P01861 (correlates with) PLG	-0.648395
P00441 (correlates with) DPP9	-0.647931
Q16531 (correlates with) CFB	-0.647669
P01860 (correlates with) EFEMP1	-0.64752
P01024 (correlates with) DPP9	-0.647485
Q9NVN3 (correlates with) TPP2	-0.647368
P01860 (correlates with) F9	-0.647234
P05155 (correlates with) EFEMP1	-0.64723
Q16658 (correlates with) FASN	-0.647012
P11766 (correlates with) TPP1	-0.646954
Q9UMS4 (correlates with) HP	-0.646634
O75369 (correlates with) HP	-0.646343
P28065 (correlates with) F13A1	-0.646188
P01859 (correlates with) C2	-0.646175
P00450 (correlates with) LTF	-0.645681
P25311 (correlates with) FASN	-0.645374
P08185 (correlates with) CFB	-0.645317
Q96CW1 (correlates with) PLG	-0.645255
P19827 (correlates with) AZU1	-0.64472
O43396 (correlates with) CTSH	-0.644605
P51884 (correlates with) TPP2	-0.64455
P04196 (correlates with) F13A1	-0.644535
Q99538 (correlates with) CFB	-0.644346
Q92542 (correlates with) FASN	-0.644265
P61916 (correlates with) CFI	-0.64423
O96009 (correlates with) TPP1	-0.644216
Q92688 (correlates with) F13A1	-0.64419
P04217 (correlates with) AZU1	-0.6441
P01781 (correlates with) LTF	-0.644049
P02679 (correlates with) F9	-0.643908
Q16531 (correlates with) FASN	-0.643875
P12830 (correlates with) FASN	-0.643572
Q16658 (correlates with) CTSH	-0.64347
P05091 (correlates with) TPP2	-0.643305
P02679 (correlates with) DPP9	-0.643193
O75083 (correlates with) EFEMP1	-0.643116
P05556 (correlates with) CTSH	-0.642545
P05362 (correlates with) PLG	-0.642299
P10909 (correlates with) CFI	-0.642011
P28065 (correlates with) F2	-0.641954
P00325 (correlates with) TPP1	-0.641907
P04264 (correlates with) HP	-0.64185
O75083 (correlates with) C2	-0.641653
P04196 (correlates with) PLG	-0.641627
P01781 (correlates with) F13A1	-0.641626
O43396 (correlates with) F13A1	-0.641336
P21333 (correlates with) SIAE	-0.641152
O75083 (correlates with) DPP9	-0.641144
P02743 (correlates with) EFEMP1	-0.641108
P80748 (correlates with) LTF	-0.640961
P31483 (correlates with) LTF	-0.64081
P05362 (correlates with) CFI	-0.639274
P02743 (correlates with) AZU1	-0.638981
Q92542 (correlates with) CFB	-0.638971
P05362 (correlates with) PLD3	-0.638971
P01876 (correlates with) PLG	-0.638649
P04217 (correlates with) C7	-0.638376
P16452 (correlates with) HP	-0.638245
P02743 (correlates with) F9	-0.638117
Q05707 (correlates with) PLG	-0.638034
P53680 (correlates with) CTSH	-0.638011
P25774 (correlates with) PLG	-0.637608
P05091 (correlates with) TPP1	-0.637474
P01023 (correlates with) SIAE	-0.637397
P21333 (correlates with) TPP1	-0.637261
P19827 (correlates with) TPP1	-0.637132
P10909 (correlates with) TPP1	-0.636939
P20702 (correlates with) CFB	-0.636841
P02750 (correlates with) HP	-0.636588
P10253 (correlates with) PLG	-0.636381
Q16658 (correlates with) CFB	-0.636268
P27694 (correlates with) CFB	-0.636211
Q9P246 (correlates with) C2	-0.635958
P27694 (correlates with) FASN	-0.635607
P20702 (correlates with) FASN	-0.635246
P05556 (correlates with) F13A1	-0.635016
P00450 (correlates with) CFB	-0.634781
Q92688 (correlates with) F2	-0.63461
Q9BR76 (correlates with) TPP2	-0.634606
P01781 (correlates with) FASN	-0.634496
P27694 (correlates with) F13A1	-0.634083
P01714 (correlates with) TPP2	-0.634043
Q92688 (correlates with) CTSH	-0.634012
P50552 (correlates with) C2	-0.633962
Q92542 (correlates with) CTSH	-0.633771
P68371 (correlates with) PLG	-0.633764
P28065 (correlates with) CTSH	-0.633735
P02750 (correlates with) FASN	-0.633678
P08185 (correlates with) FASN	-0.633469
P80748 (correlates with) FASN	-0.633362
P02765 (correlates with) TPP1	-0.633358
P19827 (correlates with) KLKB1	-0.63333
P00441 (correlates with) AZU1	-0.633206
Q99538 (correlates with) FASN	-0.633038
P51610 (correlates with) F13A1	-0.632708
P01859 (correlates with) TPP2	-0.632544
P01042 (correlates with) PLG	-0.632462
P01042 (correlates with) HP	-0.632225
P61916 (correlates with) TPP1	-0.631969
P05155 (correlates with) AZU1	-0.631878
Q92747 (correlates with) PLG	-0.631595
Q96CW1 (correlates with) PLD3	-0.631522
Q9P246 (correlates with) SIAE	-0.631518
P11766 (correlates with) TPP2	-0.631361
P02790 (correlates with) DPP9	-0.630919
P80748 (correlates with) CTSH	-0.630624
P19827 (correlates with) DPP9	-0.630448
P01024 (correlates with) F9	-0.630405
P05155 (correlates with) C7	-0.630374
P01023 (correlates with) CD163	-0.630257
P80748 (correlates with) PLG	-0.62955
P02743 (correlates with) C7	-0.62951
P02790 (correlates with) F9	-0.629506
P01859 (correlates with) CD163	-0.629232
P00441 (correlates with) EFEMP1	-0.629167
P01857 (correlates with) DPP9	-0.629053
P01860 (correlates with) C7	-0.62899
P01781 (correlates with) CTSH	-0.62895
P01859 (correlates with) F9	-0.628881
P01859 (correlates with) EFEMP1	-0.628844
P25774 (correlates with) F2	-0.628733
O75369 (correlates with) F2	-0.628682
P08185 (correlates with) HP	-0.628193
P00450 (correlates with) FASN	-0.628146
Q9UMS4 (correlates with) PLG	-0.628049
P10909 (correlates with) TPP2	-0.627789
P01860 (correlates with) AZU1	-0.62776
O75083 (correlates with) PSMA6	-0.627499
P31483 (correlates with) CFB	-0.627475
P04217 (correlates with) KLKB1	-0.627183
P12110 (correlates with) CFI	-0.627106
P31483 (correlates with) FASN	-0.626538
P01781 (correlates with) CFB	-0.626414
P16452 (correlates with) LTF	-0.626037
P02679 (correlates with) EFEMP1	-0.62583
P51884 (correlates with) DPP9	-0.625758
Q16531 (correlates with) CTSH	-0.625667
P51884 (correlates with) EFEMP1	-0.625502
P01860 (correlates with) CD163	-0.625428
P02679 (correlates with) C2	-0.625017
P19827 (correlates with) HP	-0.624395
P61916 (correlates with) TPP2	-0.624034
Q9NVN3 (correlates with) CFI	-0.624001
P01861 (correlates with) F2	-0.623911
P61586 (correlates with) LTF	-0.623855
Q92542 (correlates with) F13A1	-0.623746
P61586 (correlates with) CFB	-0.623254
P01023 (correlates with) F9	-0.622878
Q92542 (correlates with) TPP1	-0.62277
Q16531 (correlates with) F13A1	-0.622718
O75369 (correlates with) PLG	-0.622618
P01714 (correlates with) AZU1	-0.622207
P27694 (correlates with) CTSH	-0.621961
P02743 (correlates with) KLKB1	-0.621907
P53680 (correlates with) CD163	-0.621866
Q9P246 (correlates with) EFEMP1	-0.621806
P01861 (correlates with) TPP1	-0.621774
P21333 (correlates with) DPP4	-0.621731
P62873 (correlates with) LTF	-0.621707
P00441 (correlates with) F9	-0.621653
P51884 (correlates with) F9	-0.621407
O75083 (correlates with) CD163	-0.621233
P21333 (correlates with) F9	-0.620866
P01859 (correlates with) DPP9	-0.620843
P27169 (correlates with) LTF	-0.620734
P04217 (correlates with) ELANE	-0.620672
P01023 (correlates with) DPP4	-0.6206
P10253 (correlates with) HP	-0.620496
P62873 (correlates with) CFB	-0.620465
Q9P246 (correlates with) F9	-0.6204
P01011 (correlates with) TPP2	-0.620389
P01024 (correlates with) C2	-0.620354
P00441 (correlates with) C7	-0.620177
Q16658 (correlates with) F2	-0.620068
P01011 (correlates with) C2	-0.619854
P80748 (correlates with) CFB	-0.619514
P11766 (correlates with) PLD3	-0.619404
P05556 (correlates with) HP	-0.619303
P20702 (correlates with) CTSH	-0.619205
P01714 (correlates with) CD163	-0.619175
P16452 (correlates with) CFB	-0.619051
P16452 (correlates with) TPP1	-0.618846
P50552 (correlates with) TPP2	-0.618564
P05155 (correlates with) PSMA6	-0.618558
Q92747 (correlates with) TPP1	-0.618054
O75083 (correlates with) DPP4	-0.617946
Q92542 (correlates with) PLG	-0.617792
P68371 (correlates with) HP	-0.617715
O43396 (correlates with) HP	-0.617444
P02679 (correlates with) PSMA6	-0.617364
P04217 (correlates with) PSMA6	-0.617227
P19827 (correlates with) C2	-0.617051
P02743 (correlates with) ELANE	-0.616685
Q9P246 (correlates with) DPP4	-0.616615
P80748 (correlates with) F13A1	-0.616521
P61916 (correlates with) PLD3	-0.616203
P04196 (correlates with) HP	-0.616037
P19827 (correlates with) ELANE	-0.616024
P00441 (correlates with) KLKB1	-0.615941
P12830 (correlates with) CTSH	-0.615861
P01042 (correlates with) CFI	-0.615752
P51884 (correlates with) CD163	-0.615676
P20702 (correlates with) F13A1	-0.615646
P14780 (correlates with) LTF	-0.615546
P05155 (correlates with) KLKB1	-0.615505
P01714 (correlates with) DPP9	-0.615457
P00450 (correlates with) HP	-0.615431
P27694 (correlates with) F2	-0.615031
P14780 (correlates with) CFB	-0.615006
P01024 (correlates with) EFEMP1	-0.614869
P01857 (correlates with) F9	-0.614842
P04217 (correlates with) LPA	-0.614779
Q9BRP4 (correlates with) HP	-0.614545
P02765 (correlates with) DPP9	-0.614218
P00325 (correlates with) DPP9	-0.614117
O75083 (correlates with) C7	-0.614078
P12830 (correlates with) F13A1	-0.613993
P05556 (correlates with) PLG	-0.613832
Q16658 (correlates with) PLG	-0.613646
P01714 (correlates with) EFEMP1	-0.613631
P04433 (correlates with) LTF	-0.61358
P84095 (correlates with) HP	-0.613524
P01857 (correlates with) C2	-0.613428
Q92747 (correlates with) F2	-0.613411
P01781 (correlates with) F2	-0.61309
P27169 (correlates with) CFB	-0.613004
Q9UMS4 (correlates with) TPP1	-0.612774
P53634 (correlates with) LTF	-0.612405
P00441 (correlates with) ELANE	-0.612148
P05155 (correlates with) LPA	-0.611787
Q96CW1 (correlates with) CFI	-0.611771
Q92747 (correlates with) PLD3	-0.611728
P02790 (correlates with) EFEMP1	-0.611585
P31483 (correlates with) CTSH	-0.611364
P68371 (correlates with) CFI	-0.611317
P53680 (correlates with) PLG	-0.611285
P55884 (correlates with) F13A1	-0.611228
P21333 (correlates with) CD163	-0.611011
P02790 (correlates with) C2	-0.610971
P02765 (correlates with) PLD3	-0.610827
P10909 (correlates with) PLD3	-0.610409
P56199 (correlates with) HP	-0.610192
P68371 (correlates with) TPP2	-0.610167
P01871 (correlates with) C2	-0.610164
O43396 (correlates with) F2	-0.609968
P61586 (correlates with) HP	-0.609663
P01860 (correlates with) KLKB1	-0.609621
P01714 (correlates with) ELANE	-0.609572
P04217 (correlates with) CD163	-0.609532
P10253 (correlates with) CFI	-0.609232
P56199 (correlates with) CFB	-0.609215
P05091 (correlates with) DPP9	-0.608966
P12110 (correlates with) PLD3	-0.608908
P01011 (correlates with) F9	-0.608857
Q9UMS4 (correlates with) F2	-0.60878
Q9H4G4 (correlates with) F13A1	-0.608755
O75083 (correlates with) SIAE	-0.608539
P31483 (correlates with) F13A1	-0.608485
P62873 (correlates with) HP	-0.60847
O75083 (correlates with) LPA	-0.60844
Q96CW1 (correlates with) F2	-0.608153
P01860 (correlates with) PSMA6	-0.608124
P05155 (correlates with) ELANE	-0.608055
P02765 (correlates with) AZU1	-0.60797
P01024 (correlates with) AZU1	-0.60797
P01023 (correlates with) EFEMP1	-0.607793
Q99538 (correlates with) CTSH	-0.607778
O43396 (correlates with) PLG	-0.60776
P01860 (correlates with) ELANE	-0.60756
O95757 (correlates with) HP	-0.60744
P02671 (correlates with) C2	-0.607401
P51884 (correlates with) C7	-0.607087
P01871 (correlates with) CD163	-0.606818
P01714 (correlates with) C7	-0.606762
P25311 (correlates with) CTSH	-0.606751
P08185 (correlates with) CTSH	-0.606648
O75369 (correlates with) CFI	-0.606522
P00450 (correlates with) CTSH	-0.606348
P01877 (correlates with) EFEMP1	-0.606297
Q96PD5 (correlates with) LTF	-0.606202
P04433 (correlates with) CFB	-0.60608
P01011 (correlates with) EFEMP1	-0.605828
Q92747 (correlates with) CFI	-0.605637
P01861 (correlates with) HP	-0.605624
Q9NVN3 (correlates with) PLG	-0.60555
P00325 (correlates with) F9	-0.605542
P01860 (correlates with) LPA	-0.605301
P01024 (correlates with) PSMA6	-0.605208
P05091 (correlates with) F9	-0.605183
P51884 (correlates with) AZU1	-0.605024
P01859 (correlates with) C7	-0.60487
Q05707 (correlates with) TPP2	-0.604844
P16452 (correlates with) FASN	-0.604782
P02679 (correlates with) C7	-0.604632
P12830 (correlates with) HP	-0.604463
P55884 (correlates with) LTF	-0.604338
P53634 (correlates with) CFB	-0.604226
P11766 (correlates with) C2	-0.604198
P53680 (correlates with) F13A1	-0.604156
P51610 (correlates with) F2	-0.604127
P02790 (correlates with) PSMA6	-0.604014
P01857 (correlates with) EFEMP1	-0.603899
P01011 (correlates with) DPP9	-0.603826
P05155 (correlates with) CD163	-0.603546
Q9NVN3 (correlates with) HP	-0.603354
P02765 (correlates with) C2	-0.603291
P10253 (correlates with) TPP2	-0.603188
P05362 (correlates with) TPP1	-0.602816
Q99538 (correlates with) HP	-0.602404
P27169 (correlates with) FASN	-0.602244
P25311 (correlates with) PLD3	-0.601814
P01024 (correlates with) C7	-0.601767
P01042 (correlates with) TPP2	-0.601678
P02743 (correlates with) LPA	-0.601544
Q92542 (correlates with) HP	-0.601481
P51610 (correlates with) CTSH	-0.601332
P01714 (correlates with) KLKB1	-0.601324
Q99538 (correlates with) F13A1	-0.601097
Q9H4G4 (correlates with) CTSH	-0.601091
P53680 (correlates with) CFI	-0.601019
Q9BR76 (correlates with) PLG	-0.600993
Q9BRP4 (correlates with) CFB	-0.600934
P12110 (correlates with) TPP1	-0.600699
P02743 (correlates with) CD163	-0.600481
P01023 (correlates with) C2	-0.600403
P00325 (correlates with) C2	-0.600289
P56199 (correlates with) LTF	-0.600169
P19827 (correlates with) C1R	-0.600142
P02746 (correlates with) F13A1	-0.59976
P02743 (correlates with) PSMA6	-0.599652
P04264 (correlates with) CD163	-0.599614
P02679 (correlates with) LPA	-0.599524
P01877 (correlates with) AZU1	-0.599336
Q9BRP4 (correlates with) LTF	-0.598816
P01871 (correlates with) F9	-0.598658
P04217 (correlates with) C1S	-0.598637
P02750 (correlates with) CTSH	-0.598567
P02679 (correlates with) AZU1	-0.598478
Q96PD5 (correlates with) CFB	-0.598075
P04264 (correlates with) PLD3	-0.597946
P61586 (correlates with) FASN	-0.597842
O96009 (correlates with) F9	-0.597691
P01871 (correlates with) EFEMP1	-0.597099
P02671 (correlates with) TPP2	-0.596992
Q9UMS4 (correlates with) PLD3	-0.596886
P50552 (correlates with) DPP9	-0.596336
P62873 (correlates with) FASN	-0.59632
Q9H4G4 (correlates with) LTF	-0.596213
O75083 (correlates with) AZU1	-0.596181
P80748 (correlates with) C2	-0.596131
P10909 (correlates with) C2	-0.596086
Q9UMS4 (correlates with) CFI	-0.595868
Q9BR76 (correlates with) CFI	-0.595868
P55884 (correlates with) F2	-0.595803
P21333 (correlates with) EFEMP1	-0.595692
P05556 (correlates with) F2	-0.595671
P02765 (correlates with) KLKB1	-0.595509
Q16531 (correlates with) HP	-0.595503
O75369 (correlates with) PLD3	-0.595478
P53634 (correlates with) FASN	-0.595478
P01024 (correlates with) KLKB1	-0.595335
P12830 (correlates with) F2	-0.595268
P55884 (correlates with) FASN	-0.595191
P05091 (correlates with) C2	-0.595104
P04062 (correlates with) LTF	-0.594934
P50552 (correlates with) AZU1	-0.594913
P05556 (correlates with) TPP1	-0.594842
P04433 (correlates with) FASN	-0.594797
P01781 (correlates with) PLG	-0.594746
P01011 (correlates with) CD163	-0.59458
P00450 (correlates with) TPP1	-0.594535
P01857 (correlates with) AZU1	-0.594494
P01859 (correlates with) DPP4	-0.594245
P01859 (correlates with) AZU1	-0.594173
Q9H4G4 (correlates with) FASN	-0.593877
P21333 (correlates with) PSMA6	-0.593836
P01877 (correlates with) C7	-0.593588
P25774 (correlates with) TPP1	-0.593574
P25774 (correlates with) HP	-0.593502
P00325 (correlates with) EFEMP1	-0.593498
O96009 (correlates with) CD163	-0.593402
P12110 (correlates with) TPP2	-0.593242
P01877 (correlates with) ELANE	-0.593014
P01876 (correlates with) TPP2	-0.592733
P16452 (correlates with) PLD3	-0.592722
P01860 (correlates with) DPP4	-0.5924
P01024 (correlates with) LPA	-0.592386
P01876 (correlates with) F9	-0.591822
Q16531 (correlates with) PLG	-0.59178
P02790 (correlates with) C7	-0.591773
P00441 (correlates with) CD163	-0.591718
P05155 (correlates with) C1S	-0.591546
Q9P246 (correlates with) DPP9	-0.591469
P04062 (correlates with) HP	-0.591453
P05091 (correlates with) EFEMP1	-0.591358
P80748 (correlates with) HP	-0.591112
P61916 (correlates with) C2	-0.590957
Q16531 (correlates with) F2	-0.59066
P04196 (correlates with) C2	-0.59055
P01714 (correlates with) CD5L	-0.590316
P14780 (correlates with) FASN	-0.590237
P50552 (correlates with) EFEMP1	-0.590174
P01857 (correlates with) C7	-0.59004
Q9H4G4 (correlates with) PLG	-0.590008
P55884 (correlates with) CTSH	-0.589944
P01023 (correlates with) PSMA6	-0.589812
O75083 (correlates with) PSMB9	-0.589683
P04196 (correlates with) F2	-0.589603
P25311 (correlates with) F13A1	-0.589573
P02743 (correlates with) C1S	-0.58957
P00450 (correlates with) F13A1	-0.589498
Q96CW1 (correlates with) C2	-0.589412
P11766 (correlates with) AZU1	-0.589348
P01859 (correlates with) PSMA6	-0.589276
P49407 (correlates with) LTF	-0.589167
Q9P246 (correlates with) C7	-0.589092
Q96PD5 (correlates with) FASN	-0.589031
P20702 (correlates with) PLG	-0.589015
P08185 (correlates with) F13A1	-0.58886
Q969X5 (correlates with) LTF	-0.588753
P55884 (correlates with) CFB	-0.588623
P01871 (correlates with) TPP2	-0.588445
P28065 (correlates with) TPP2	-0.588413
P28065 (correlates with) CFI	-0.588366
P01877 (correlates with) CD5L	-0.588342
P11766 (correlates with) DPP9	-0.588329
Q92688 (correlates with) HP	-0.588095
P02750 (correlates with) PLD3	-0.588044
O96009 (correlates with) SIAE	-0.587926
P00441 (correlates with) LPA	-0.58782
Q14767 (correlates with) LTF	-0.587773
P01859 (correlates with) SIAE	-0.587702
P28065 (correlates with) HP	-0.587607
P51884 (correlates with) ELANE	-0.587506
P04062 (correlates with) CFB	-0.587389
P02790 (correlates with) AZU1	-0.587198
P01877 (correlates with) DPP9	-0.58715
P01857 (correlates with) PSMA6	-0.586906
P49407 (correlates with) CFB	-0.586755
P02790 (correlates with) LPA	-0.586742
P14780 (correlates with) HP	-0.586681
P01714 (correlates with) F9	-0.586631
P20702 (correlates with) HP	-0.586568
P51884 (correlates with) KLKB1	-0.586519
P53634 (correlates with) F13A1	-0.586446
P01877 (correlates with) TPP2	-0.586317
P35442 (correlates with) LTF	-0.586153
Q14767 (correlates with) CFB	-0.586069
P51610 (correlates with) FASN	-0.585992
P51610 (correlates with) TPP2	-0.585787
O96009 (correlates with) EFEMP1	-0.585681
P02746 (correlates with) F2	-0.585372
P05155 (correlates with) DPP4	-0.585229
Q05707 (correlates with) CFI	-0.584723
P04217 (correlates with) PREP	-0.584459
Q92688 (correlates with) CFI	-0.584434
P02679 (correlates with) KLKB1	-0.584383
P51610 (correlates with) LTF	-0.58438
O96009 (correlates with) C2	-0.583972
P01859 (correlates with) LPA	-0.583952
P01011 (correlates with) C7	-0.583821
O43396 (correlates with) CFI	-0.583736
P01861 (correlates with) CFI	-0.583549
P10909 (correlates with) AZU1	-0.583471
P08185 (correlates with) TPP1	-0.583346
P00450 (correlates with) PLG	-0.58333
P10909 (correlates with) DPP9	-0.583304
P01871 (correlates with) DPP9	-0.583048
Q9P246 (correlates with) TPP2	-0.582814
P04217 (correlates with) DPP4	-0.582789
P50552 (correlates with) CD163	-0.58276
Q04206 (correlates with) LTF	-0.58252
P50552 (correlates with) C7	-0.582173
P02765 (correlates with) ELANE	-0.581921
P61916 (correlates with) DPP9	-0.581919
P31483 (correlates with) PLG	-0.581746
P01860 (correlates with) C1S	-0.581701
O96009 (correlates with) DPP4	-0.581675
P02750 (correlates with) F13A1	-0.581645
P00441 (correlates with) PSMA6	-0.581577
P04217 (correlates with) PRCP	-0.581374
Q9UBR2 (correlates with) TPP1	-0.581309
P04217 (correlates with) CD5L	-0.581016
Q92688 (correlates with) TPP2	-0.581002
P01042 (correlates with) PLD3	-0.580958
P08185 (correlates with) PLD3	-0.58093
P51884 (correlates with) PSMA6	-0.580917
P25774 (correlates with) CFI	-0.580915
Q92692 (correlates with) LTF	-0.580886
P01857 (correlates with) KLKB1	-0.580884
P49407 (correlates with) HP	-0.580869
P04264 (correlates with) SIAE	-0.580866
P51884 (correlates with) LPA	-0.580863
P01876 (correlates with) TPP1	-0.580835
P02746 (correlates with) LTF	-0.580812
P20702 (correlates with) F2	-0.580805
P05107 (correlates with) LTF	-0.580598
Q04206 (correlates with) CFB	-0.580323
P50552 (correlates with) ELANE	-0.580233
O75369 (correlates with) TPP1	-0.580171
P04217 (correlates with) PSMB9	-0.580019
P04264 (correlates with) CFB	-0.579876
P05155 (correlates with) PREP	-0.579835
P00441 (correlates with) C1S	-0.579817
P05155 (correlates with) PSMB9	-0.579583
O15533 (correlates with) F13A1	-0.57958
O75083 (correlates with) KLKB1	-0.579444
P01023 (correlates with) DPP9	-0.579393
P01024 (correlates with) ELANE	-0.579297
P15144 (correlates with) LTF	-0.579227
P01024 (correlates with) C1S	-0.578962
P25311 (correlates with) CFI	-0.578935
P19827 (correlates with) C7	-0.578853
P05362 (correlates with) TPP2	-0.578686
P02743 (correlates with) CD5L	-0.578624
P27169 (correlates with) CTSH	-0.578621
P25774 (correlates with) TPP2	-0.578594
P05091 (correlates with) PSMA6	-0.578541
P04217 (correlates with) C1R	-0.578364
P00325 (correlates with) PSMA6	-0.578226
P02679 (correlates with) DPP4	-0.578167
P00325 (correlates with) AZU1	-0.578166
P53634 (correlates with) F2	-0.578101
P08185 (correlates with) PLG	-0.577945
Q05707 (correlates with) HP	-0.577791
P35442 (correlates with) CFB	-0.577709
P27694 (correlates with) PLG	-0.57769
P01859 (correlates with) ELANE	-0.577533
P16452 (correlates with) CD163	-0.577523
P00325 (correlates with) C7	-0.57752
Q9P246 (correlates with) PSMA6	-0.577511
P53680 (correlates with) C2	-0.577441
Q16658 (correlates with) TPP2	-0.577422
Q9BY67 (correlates with) LTF	-0.577405
P02743 (correlates with) PRCP	-0.577257
Q92688 (correlates with) PLG	-0.57722
P01857 (correlates with) LPA	-0.577174
P01860 (correlates with) PSMB9	-0.576917
P04264 (correlates with) LTF	-0.576908
P05107 (correlates with) CFB	-0.576907
P05556 (correlates with) CFI	-0.576754
P84095 (correlates with) CFB	-0.576744
P41091 (correlates with) F13A1	-0.576656
Q969X5 (correlates with) FASN	-0.576642
P27169 (correlates with) F13A1	-0.576578
P31483 (correlates with) HP	-0.576406
P61916 (correlates with) AZU1	-0.576183
P50552 (correlates with) KLKB1	-0.576152
O95757 (correlates with) SIAE	-0.576058
P04062 (correlates with) FASN	-0.575935
P00441 (correlates with) CD5L	-0.57593
P01861 (correlates with) C2	-0.57591
P01877 (correlates with) KLKB1	-0.57584
P01860 (correlates with) CD5L	-0.575649
P01859 (correlates with) KLKB1	-0.575298
P01011 (correlates with) AZU1	-0.575292
P01871 (correlates with) SIAE	-0.57525
P19827 (correlates with) C1S	-0.575206
P01860 (correlates with) PREP	-0.57514
P53634 (correlates with) CTSH	-0.575132
Q969X5 (correlates with) CFB	-0.575082
P51610 (correlates with) PLG	-0.575052
P16452 (correlates with) CTSH	-0.574948
P01871 (correlates with) DPP4	-0.574907
P51884 (correlates with) DPP4	-0.574905
P21333 (correlates with) C2	-0.574707
P02671 (correlates with) DPP9	-0.574418
O75083 (correlates with) ELANE	-0.574411
P02746 (correlates with) FASN	-0.57434
Q99538 (correlates with) F2	-0.574333
Q9C0C9 (correlates with) LTF	-0.574327
O95302 (correlates with) LTF	-0.574143
P01876 (correlates with) PSMA6	-0.574142
P31483 (correlates with) F2	-0.574063
P11766 (correlates with) KLKB1	-0.57401
P04264 (correlates with) TPP1	-0.573989
P02746 (correlates with) CTSH	-0.573922
P02790 (correlates with) KLKB1	-0.573684
P02751 (correlates with) LTF	-0.573675
P02743 (correlates with) PREP	-0.57363
Q92542 (correlates with) F2	-0.573404
P05091 (correlates with) C7	-0.573336
P01011 (correlates with) PSMA6	-0.573035
P01023 (correlates with) TPP2	-0.572966
P01877 (correlates with) F9	-0.572824
P00441 (correlates with) PRCP	-0.572636
P02679 (correlates with) C1S	-0.572516
Q9H4G4 (correlates with) CFB	-0.572447
P84095 (correlates with) LTF	-0.572378
P02679 (correlates with) ELANE	-0.572372
P01860 (correlates with) SIAE	-0.572122
P19827 (correlates with) PRCP	-0.571942
P19827 (correlates with) PLD3	-0.571853
Q96PD5 (correlates with) F13A1	-0.571799
P12830 (correlates with) CFI	-0.571779
P28065 (correlates with) PLG	-0.571528
P01861 (correlates with) TPP2	-0.571521
O75083 (correlates with) PREP	-0.571443
P50552 (correlates with) F9	-0.571406
P05556 (correlates with) PLD3	-0.571396
P01781 (correlates with) TPP2	-0.571395
P02679 (correlates with) PSMB9	-0.571351
P02671 (correlates with) AZU1	-0.571214
P01024 (correlates with) C1R	-0.571132
P04433 (correlates with) HP	-0.571062
P02679 (correlates with) CD163	-0.570964
P02765 (correlates with) C7	-0.570948
P01871 (correlates with) C7	-0.570855
Q92692 (correlates with) CFB	-0.570768
Q9BRP4 (correlates with) FASN	-0.570698
P05091 (correlates with) AZU1	-0.570667
P04196 (correlates with) CFI	-0.570644
P05155 (correlates with) C1R	-0.570541
O96009 (correlates with) TPP2	-0.570456
P02751 (correlates with) CFB	-0.570308
P04433 (correlates with) CTSH	-0.570272
P02743 (correlates with) C1R	-0.570204
P10253 (correlates with) PLD3	-0.570107
Q9NVN3 (correlates with) DPP9	-0.570036
P05155 (correlates with) PRCP	-0.569962
P11766 (correlates with) ELANE	-0.569874
Q9P246 (correlates with) LPA	-0.569802
P84095 (correlates with) PLD3	-0.569715
P01714 (correlates with) PRCP	-0.569603
P01860 (correlates with) PRCP	-0.569567
P04196 (correlates with) PLD3	-0.569424
P00450 (correlates with) PLD3	-0.569279
P18428 (correlates with) LTF	-0.569262
Q9BRP4 (correlates with) PLD3	-0.569241
P27694 (correlates with) TPP2	-0.569169
P04211 (correlates with) CFB	-0.569044
Q99538 (correlates with) PLG	-0.568939
P35442 (correlates with) FASN	-0.56887
P01023 (correlates with) C7	-0.568824
P01857 (correlates with) ELANE	-0.568801
O43396 (correlates with) PLD3	-0.568769
P10909 (correlates with) KLKB1	-0.568642
P04062 (correlates with) TPP1	-0.568481
Q96CW1 (correlates with) CD163	-0.568453
O95302 (correlates with) CFB	-0.568324
P12830 (correlates with) PLG	-0.568295
P01876 (correlates with) DPP9	-0.568291
P01011 (correlates with) DPP4	-0.568237
P05155 (correlates with) CD5L	-0.56815
O96009 (correlates with) DPP9	-0.568047
O75083 (correlates with) C1S	-0.567983
Q9NY65 (correlates with) CFB	-0.567956
Q96PD5 (correlates with) CTSH	-0.567857
P02671 (correlates with) EFEMP1	-0.567252
P01023 (correlates with) LPA	-0.567138
P68371 (correlates with) PLD3	-0.567111
O43396 (correlates with) TPP1	-0.567059
P21333 (correlates with) DPP9	-0.567045
P00325 (correlates with) LPA	-0.566766
P15144 (correlates with) CFB	-0.566712
Q9BY67 (correlates with) CFB	-0.566636
Q9UHD1 (correlates with) F13A1	-0.566604
P53680 (correlates with) SIAE	-0.566464
Q14767 (correlates with) FASN	-0.566325
Q9NY65 (correlates with) LTF	-0.566285
Q14767 (correlates with) F2	-0.566271
P15144 (correlates with) FASN	-0.566249
P02750 (correlates with) CFI	-0.566113
P56199 (correlates with) FASN	-0.566106
P25311 (correlates with) F2	-0.5661
P01011 (correlates with) LPA	-0.56608
P49407 (correlates with) FASN	-0.56607
Q05707 (correlates with) TPP1	-0.566064
Q9NVN3 (correlates with) PSMA6	-0.56602
P02743 (correlates with) DPP4	-0.565793
O96009 (correlates with) PSMA6	-0.565781
Q9BR76 (correlates with) HP	-0.565756
Q9C0C9 (correlates with) CFB	-0.565679
P41091 (correlates with) LTF	-0.565581
Q92542 (correlates with) C2	-0.565482
P02743 (correlates with) PSMB9	-0.565411
P17812 (correlates with) F13A1	-0.56539
Q92692 (correlates with) FASN	-0.565332
O95757 (correlates with) PLD3	-0.565126
P04211 (correlates with) LTF	-0.565099
P41091 (correlates with) F2	-0.565014
P05091 (correlates with) LPA	-0.564924
P10253 (correlates with) TPP1	-0.564876
O75369 (correlates with) TPP2	-0.564734
P00325 (correlates with) KLKB1	-0.564559
P18428 (correlates with) CFB	-0.564495
Q969X5 (correlates with) CTSH	-0.564469
P17812 (correlates with) F2	-0.564342
P01023 (correlates with) PSMB9	-0.564338
Q9P246 (correlates with) AZU1	-0.564176
P01859 (correlates with) PSMB9	-0.564071
Q16531 (correlates with) CFI	-0.563969
Q16706 (correlates with) SIAE	-0.563939
Q92747 (correlates with) C2	-0.563938
Q9BY67 (correlates with) FASN	-0.563773
P02679 (correlates with) PREP	-0.563683
P10909 (correlates with) ELANE	-0.563554
P02746 (correlates with) CFB	-0.563516
P27169 (correlates with) HP	-0.563474
P56199 (correlates with) PLD3	-0.563414
P61586 (correlates with) PLD3	-0.563069
P02765 (correlates with) EFEMP1	-0.563016
P21333 (correlates with) PSMB9	-0.562839
P35442 (correlates with) HP	-0.562339
P00441 (correlates with) PREP	-0.562337
Q9C0C9 (correlates with) F13A1	-0.562337
Q9P246 (correlates with) PSMB9	-0.562242
P62873 (correlates with) PLD3	-0.562164
P02790 (correlates with) DPP4	-0.562066
P04433 (correlates with) F13A1	-0.562063
Q92945 (correlates with) LTF	-0.562062
P01857 (correlates with) C1S	-0.561942
P02790 (correlates with) C1S	-0.561923
P21333 (correlates with) LPA	-0.561788
P55884 (correlates with) TPP2	-0.561733
P01876 (correlates with) EFEMP1	-0.561706
P25311 (correlates with) PLG	-0.561612
P61916 (correlates with) KLKB1	-0.56161
P02765 (correlates with) C1R	-0.561605
Q9H4G4 (correlates with) F2	-0.561318
P00441 (correlates with) C1R	-0.561132
P02790 (correlates with) ELANE	-0.5611
P01871 (correlates with) PSMA6	-0.561003
P51884 (correlates with) CD5L	-0.560983
P05107 (correlates with) FASN	-0.56092
P11766 (correlates with) C7	-0.56082
O95302 (correlates with) HP	-0.560765
P21333 (correlates with) TPP2	-0.560586
Q9UMS4 (correlates with) C2	-0.560439
Q9C0C9 (correlates with) F2	-0.560411
Q04206 (correlates with) FASN	-0.560377
P12110 (correlates with) C2	-0.560164
Q9C0C9 (correlates with) FASN	-0.559832
Q99538 (correlates with) CFI	-0.559706
P51884 (correlates with) SIAE	-0.559593
P05362 (correlates with) F9	-0.559426
Q9H4G4 (correlates with) TPP1	-0.559355
P61586 (correlates with) CTSH	-0.559349
P02671 (correlates with) C7	-0.559323
P16452 (correlates with) PLG	-0.559298
Q9NVN3 (correlates with) F9	-0.559191
P01024 (correlates with) PREP	-0.559107
P01042 (correlates with) TPP1	-0.559088
P62873 (correlates with) CTSH	-0.558963
P08185 (correlates with) CFI	-0.558913
P01861 (correlates with) AZU1	-0.558729
P12110 (correlates with) DPP9	-0.55854
Q92945 (correlates with) CFB	-0.558454
P51610 (correlates with) CFB	-0.558392
P20702 (correlates with) TPP1	-0.558292
Q86X55 (correlates with) LTF	-0.558197
P01861 (correlates with) PLD3	-0.558137
P01011 (correlates with) KLKB1	-0.55803
P11766 (correlates with) EFEMP1	-0.558021
P02750 (correlates with) PLG	-0.558007
P02790 (correlates with) PSMB9	-0.557967
Q16658 (correlates with) CFI	-0.557604
P02746 (correlates with) TPP2	-0.557523
P53680 (correlates with) F2	-0.557487
P41091 (correlates with) FASN	-0.557437
P23083 (correlates with) HP	-0.55743
P01011 (correlates with) ELANE	-0.557339
Q969X5 (correlates with) F13A1	-0.557132
P05091 (correlates with) KLKB1	-0.557056
P01011 (correlates with) SIAE	-0.557044
P51884 (correlates with) C1S	-0.556875
P05362 (correlates with) C2	-0.556809
P02671 (correlates with) CD163	-0.556792
P50552 (correlates with) CD5L	-0.55677
P01714 (correlates with) LPA	-0.55663
P27694 (correlates with) CFI	-0.556475
P02671 (correlates with) ELANE	-0.556465
P68371 (correlates with) DPP9	-0.556392
Q92542 (correlates with) CFI	-0.556387
P05362 (correlates with) DPP9	-0.55637
P29966 (correlates with) F2	-0.55625
P05155 (correlates with) SIAE	-0.556237
O15533 (correlates with) CTSH	-0.556236
Q96PD5 (correlates with) F2	-0.556158
P12830 (correlates with) PLD3	-0.55613
Q86X55 (correlates with) CFB	-0.556042
P61916 (correlates with) ELANE	-0.555888
Q92542 (correlates with) PLD3	-0.55583
P27169 (correlates with) F2	-0.555784
P25774 (correlates with) C2	-0.555703
Q92692 (correlates with) HP	-0.555538
P01024 (correlates with) PSMB9	-0.555275
Q99538 (correlates with) PLD3	-0.555238
P01871 (correlates with) AZU1	-0.55519
P51884 (correlates with) PSMB9	-0.555158
P02765 (correlates with) C1S	-0.555018
P02750 (correlates with) F2	-0.554975
O95302 (correlates with) FASN	-0.554805
Q04837 (correlates with) CLPP	-0.55476
P20702 (correlates with) CFI	-0.554683
P01877 (correlates with) PRCP	-0.554665
P01042 (correlates with) DPP9	-0.554644
P10909 (correlates with) C7	-0.554484
Q16531 (correlates with) TPP1	-0.554394
P19827 (correlates with) CD5L	-0.554392
P80748 (correlates with) CD5L	-0.554335
Q9BR76 (correlates with) DPP9	-0.554269
P01859 (correlates with) CD5L	-0.554246
Q14767 (correlates with) F13A1	-0.554068
P02790 (correlates with) CD163	-0.55391
P02679 (correlates with) C1R	-0.553856
P02765 (correlates with) F9	-0.553795
P01859 (correlates with) PREP	-0.553638
P23083 (correlates with) LTF	-0.553584
P00325 (correlates with) ELANE	-0.553563
P02671 (correlates with) KLKB1	-0.553514
P10253 (correlates with) DPP9	-0.553487
O96009 (correlates with) C7	-0.553481
P01860 (correlates with) C1R	-0.553457
P01871 (correlates with) LPA	-0.553436
P41091 (correlates with) CTSH	-0.553432
P02751 (correlates with) FASN	-0.553419
P17812 (correlates with) TPP2	-0.553324
P04196 (correlates with) AZU1	-0.553272
Q9UHD1 (correlates with) LTF	-0.553201
P14780 (correlates with) CTSH	-0.553161
O14672 (correlates with) F13A1	-0.55316
Q9P246 (correlates with) ELANE	-0.553074
P51884 (correlates with) PREP	-0.552937
P61916 (correlates with) EFEMP1	-0.552815
Q9P246 (correlates with) CES1	-0.552623
P61916 (correlates with) C7	-0.552596
P21333 (correlates with) C7	-0.552394
P68371 (correlates with) TPP1	-0.55237
P19827 (correlates with) EFEMP1	-0.552353
P80748 (correlates with) F2	-0.552346
Q9BY67 (correlates with) F13A1	-0.552138
P15144 (correlates with) CTSH	-0.552115
Q9NY65 (correlates with) HP	-0.551836
P02790 (correlates with) PREP	-0.551769
P80748 (correlates with) ELANE	-0.55171
P56199 (correlates with) SIAE	-0.551411
Q16658 (correlates with) HP	-0.551263
P10909 (correlates with) EFEMP1	-0.55122
P04217 (correlates with) SIAE	-0.551138
P01877 (correlates with) CES1	-0.551134
Q9NVN3 (correlates with) PLD3	-0.551102
P02679 (correlates with) SIAE	-0.550949
P02671 (correlates with) F9	-0.550904
O95757 (correlates with) CFB	-0.550791
P27694 (correlates with) HP	-0.550781
P01859 (correlates with) C1S	-0.550772
P51884 (correlates with) PRCP	-0.550747
P08185 (correlates with) F2	-0.550689
P80748 (correlates with) AZU1	-0.550668
P41091 (correlates with) CFB	-0.550638
P01714 (correlates with) C1S	-0.550528
O43396 (correlates with) TPP2	-0.550525
P00441 (correlates with) PSMB9	-0.550505
P01880 (correlates with) HP	-0.550495
P05362 (correlates with) EFEMP1	-0.550479
P00450 (correlates with) CFI	-0.550437
P04211 (correlates with) HP	-0.550261
P31483 (correlates with) TPP1	-0.550158
P04062 (correlates with) CTSH	-0.550088
P84095 (correlates with) SIAE	-0.549952
P23083 (correlates with) CFB	-0.549899
P18428 (correlates with) FASN	-0.549691
P01857 (correlates with) C1R	-0.549439
Q16658 (correlates with) TPP1	-0.549041
Q96IY4 (correlates with) LTF	-0.549026
P01781 (correlates with) CFI	-0.548974
P00441 (correlates with) DPP4	-0.548864
P78310 (correlates with) CFB	-0.548863
Q9BY67 (correlates with) CTSH	-0.548815
P46063 (correlates with) F2	-0.548762
P01877 (correlates with) DPP4	-0.548706
P05107 (correlates with) F2	-0.548692
Q16531 (correlates with) PLD3	-0.548604
P29966 (correlates with) F13A1	-0.548539
Q05707 (correlates with) AZU1	-0.548407
P04062 (correlates with) PLD3	-0.548395
P60900 (correlates with) F13A1	-0.548039
O96009 (correlates with) LPA	-0.547933
P00325 (correlates with) C1S	-0.547841
Q96AY3 (correlates with) F13A1	-0.547816
P01876 (correlates with) DPP4	-0.547803
Q86X55 (correlates with) HP	-0.547777
P04196 (correlates with) ELANE	-0.547769
P04264 (correlates with) FASN	-0.547659
P55884 (correlates with) PLG	-0.547485
P80748 (correlates with) PLD3	-0.547445
P25774 (correlates with) AZU1	-0.547406
Q9UHD1 (correlates with) FASN	-0.547184
P46063 (correlates with) F13A1	-0.547088
Q9UHD1 (correlates with) CTSH	-0.546907
Q9UHD1 (correlates with) F2	-0.546834
P31483 (correlates with) CFI	-0.546685
P00450 (correlates with) F2	-0.546531
P01877 (correlates with) SIAE	-0.54644
P35442 (correlates with) CTSH	-0.546438
P05091 (correlates with) ELANE	-0.546424
P05107 (correlates with) F13A1	-0.546389
P25774 (correlates with) PLD3	-0.546179
Q92692 (correlates with) CTSH	-0.546112
P05556 (correlates with) C2	-0.546096
O15533 (correlates with) PLG	-0.54583
P01857 (correlates with) PREP	-0.545792
P01861 (correlates with) ELANE	-0.545528
Q92747 (correlates with) TPP2	-0.54548
Q05707 (correlates with) DPP9	-0.545437
P02790 (correlates with) C1R	-0.545304
P29966 (correlates with) TPP2	-0.545083
O14672 (correlates with) LTF	-0.544935
Q969X5 (correlates with) PLG	-0.544715
P01011 (correlates with) PSMB9	-0.544692
P02750 (correlates with) TPP1	-0.544493
P78310 (correlates with) LTF	-0.544125
P01024 (correlates with) DPP4	-0.544066
Q9UMS4 (correlates with) TPP2	-0.544053
Q9C0C9 (correlates with) CTSH	-0.543663
P01876 (correlates with) LPA	-0.543655
Q9P246 (correlates with) CD5L	-0.543465
P01857 (correlates with) PSMB9	-0.543193
Q9P246 (correlates with) KLKB1	-0.54318
O95757 (correlates with) LTF	-0.543084
P01024 (correlates with) PRCP	-0.542872
P14780 (correlates with) F13A1	-0.542862
P53680 (correlates with) EFEMP1	-0.542831
P46063 (correlates with) TPP2	-0.542798
Q04206 (correlates with) HP	-0.542784
P84095 (correlates with) FASN	-0.54275
Q92945 (correlates with) FASN	-0.542744
P05091 (correlates with) C1S	-0.542599
P50552 (correlates with) PRCP	-0.542491
P02765 (correlates with) PRCP	-0.542465
P01857 (correlates with) CD163	-0.542274
P25311 (correlates with) TPP1	-0.542271
P16452 (correlates with) F13A1	-0.542202
P61586 (correlates with) F13A1	-0.54217
P01861 (correlates with) KLKB1	-0.54215
P01859 (correlates with) PRCP	-0.542139
Q96CW1 (correlates with) EFEMP1	-0.541938
Q92692 (correlates with) TPP1	-0.541837
O75083 (correlates with) CD5L	-0.541764
P13645 (correlates with) HP	-0.541748
P15144 (correlates with) F13A1	-0.541361
P61916 (correlates with) F9	-0.541315
P62873 (correlates with) F13A1	-0.541064
P50552 (correlates with) LPA	-0.540966
P01876 (correlates with) C2	-0.540884
P05091 (correlates with) DPP4	-0.540794
Q9NY65 (correlates with) FASN	-0.540781
P14780 (correlates with) PLD3	-0.540719
P11766 (correlates with) F9	-0.54069
P20702 (correlates with) PLD3	-0.540599
P01871 (correlates with) ELANE	-0.540516
P12110 (correlates with) AZU1	-0.540317
Q05707 (correlates with) C2	-0.54027
P01031 (correlates with) LTF	-0.540122
O75083 (correlates with) PRCP	-0.540105
P05091 (correlates with) CD163	-0.54007
P80748 (correlates with) CFI	-0.539788
P53680 (correlates with) DPP4	-0.539744
P01877 (correlates with) LPA	-0.539619
O15533 (correlates with) F2	-0.539522
O75695 (correlates with) LTF	-0.539407
O75695 (correlates with) CFB	-0.539353
P16452 (correlates with) C2	-0.539263
O95757 (correlates with) CD163	-0.539108
Q92688 (correlates with) PLD3	-0.539053
Q96IY4 (correlates with) CFB	-0.539016
O96009 (correlates with) PSMB9	-0.538971
Q9P246 (correlates with) PREP	-0.538932
O75369 (correlates with) C2	-0.538821
P01781 (correlates with) HP	-0.538814
P15144 (correlates with) HP	-0.538709
P01714 (correlates with) PREP	-0.538698
P01871 (correlates with) PSMB9	-0.538664
P01857 (correlates with) DPP4	-0.53865
P00325 (correlates with) CD163	-0.538632
P04196 (correlates with) CD5L	-0.538485
P18428 (correlates with) HP	-0.538431
Q969X5 (correlates with) HP	-0.538256
P61586 (correlates with) CFI	-0.538254
P28065 (correlates with) PLD3	-0.538069
Q15904 (correlates with) LTF	-0.538028
P12110 (correlates with) EFEMP1	-0.53782
O14672 (correlates with) FASN	-0.537792
P04211 (correlates with) FASN	-0.537674
Q96CW1 (correlates with) AZU1	-0.537599
Q969X5 (correlates with) TPP1	-0.537515
P27169 (correlates with) PLG	-0.53747
P02679 (correlates with) PRCP	-0.537365
P01024 (correlates with) CD163	-0.537302
P49407 (correlates with) PLD3	-0.537226
Q05707 (correlates with) KLKB1	-0.53714
Q14767 (correlates with) CTSH	-0.53702
P01871 (correlates with) KLKB1	-0.536839
P12110 (correlates with) F9	-0.536675
P15144 (correlates with) TPP1	-0.53663
P05091 (correlates with) PSMB9	-0.536582
P00325 (correlates with) DPP4	-0.536532
O15533 (correlates with) FASN	-0.536306
P10253 (correlates with) C2	-0.536291
Q86X55 (correlates with) FASN	-0.53627
Q96CW1 (correlates with) TPP2	-0.53624
Q9UHD1 (correlates with) CFB	-0.536236
P01011 (correlates with) C1S	-0.536227
Q96PD5 (correlates with) HP	-0.536195
P00325 (correlates with) PSMB9	-0.536082
P01011 (correlates with) PREP	-0.536034
O75369 (correlates with) DPP9	-0.535919
P62873 (correlates with) CFI	-0.53586
P80748 (correlates with) CD163	-0.535805
P04433 (correlates with) F2	-0.535595
Q9P258 (correlates with) LTF	-0.535523
P05556 (correlates with) TPP2	-0.53546
Q96IY4 (correlates with) FASN	-0.535322
P41091 (correlates with) TPP2	-0.535303
O75083 (correlates with) C1R	-0.535252
Q15691 (correlates with) CLPP	-0.535224
O14672 (correlates with) CTSH	-0.53514
O14672 (correlates with) F2	-0.535129
P00325 (correlates with) PREP	-0.535128
P10909 (correlates with) F9	-0.53503
P01714 (correlates with) PSMA6	-0.534983
P01876 (correlates with) SIAE	-0.534977
P00450 (correlates with) C2	-0.534903
P02765 (correlates with) LPA	-0.534895
P04433 (correlates with) PLG	-0.53486
P12830 (correlates with) TPP2	-0.534713
P05107 (correlates with) CTSH	-0.534697
P01714 (correlates with) DPP4	-0.534467
P01861 (correlates with) DPP9	-0.534411
Q8IUI8 (correlates with) CFB	-0.534379
P25774 (correlates with) DPP9	-0.534247
P98082 (correlates with) CFB	-0.534147
P10253 (correlates with) AZU1	-0.534002
Q16531 (correlates with) TPP2	-0.533943
P15144 (correlates with) PLG	-0.533749
Q8NEZ5 (correlates with) F13A1	-0.533643
P16452 (correlates with) CFI	-0.533612
P01023 (correlates with) AZU1	-0.533591
P11766 (correlates with) CD5L	-0.533429
Q99538 (correlates with) TPP1	-0.533378
P50552 (correlates with) C1S	-0.533269
P02746 (correlates with) PLG	-0.53324
P02790 (correlates with) SIAE	-0.533235
P25774 (correlates with) KLKB1	-0.533113
P60900 (correlates with) LTF	-0.533112
P27169 (correlates with) CFI	-0.533095
P01857 (correlates with) PRCP	-0.533062
P04196 (correlates with) KLKB1	-0.532915
P00325 (correlates with) C1R	-0.532806
P23083 (correlates with) FASN	-0.532803
P02743 (correlates with) SIAE	-0.532799
P02671 (correlates with) CD5L	-0.532631
Q9BQG0 (correlates with) LTF	-0.532525
P05091 (correlates with) PREP	-0.532462
P01876 (correlates with) C7	-0.532444
P49407 (correlates with) CTSH	-0.532427
Q9NVN3 (correlates with) C1R	-0.532281
P04196 (correlates with) TPP2	-0.532157
P14780 (correlates with) CFI	-0.532111
Q9BQG0 (correlates with) CFB	-0.531997
P04062 (correlates with) PLG	-0.53169
O15533 (correlates with) LTF	-0.531637
P11766 (correlates with) PRCP	-0.531629
P53634 (correlates with) TPP2	-0.531577
Q96CW1 (correlates with) C7	-0.531281
P35442 (correlates with) TPP1	-0.531277
P05362 (correlates with) PSMA6	-0.531166
P31483 (correlates with) PLD3	-0.531155
Q96CW1 (correlates with) DPP9	-0.531103
P01031 (correlates with) CFB	-0.531006
P05362 (correlates with) C7	-0.530972
P01880 (correlates with) LTF	-0.530873
P01042 (correlates with) C2	-0.530632
P01011 (correlates with) CD5L	-0.530614
P02765 (correlates with) CD5L	-0.530496
P25774 (correlates with) ELANE	-0.530456
P68371 (correlates with) AZU1	-0.530374
P35442 (correlates with) F13A1	-0.530365
Q05707 (correlates with) PLD3	-0.530363
P01023 (correlates with) PREP	-0.530343
P01880 (correlates with) CFB	-0.530288
P01042 (correlates with) F9	-0.53019
P14780 (correlates with) F2	-0.530111
Q92747 (correlates with) DPP9	-0.529979
Q92692 (correlates with) F13A1	-0.529939
Q9BY67 (correlates with) F2	-0.529919
P98082 (correlates with) LTF	-0.529738
P12110 (correlates with) C7	-0.529737
P11766 (correlates with) C1S	-0.529699
Q92542 (correlates with) AZU1	-0.529626
Q96CW1 (correlates with) ELANE	-0.529601
Q92747 (correlates with) EFEMP1	-0.529575
O14672 (correlates with) CFB	-0.52947
Q16658 (correlates with) AZU1	-0.529434
P28065 (correlates with) DPP9	-0.529429
Q8IUI8 (correlates with) LTF	-0.52941
Q92747 (correlates with) CD163	-0.529027
Q04206 (correlates with) CTSH	-0.528909
P60900 (correlates with) F2	-0.528699
P19827 (correlates with) F9	-0.528652
P02679 (correlates with) CD5L	-0.528567
P84095 (correlates with) CD163	-0.528489
P60900 (correlates with) CTSH	-0.528354
Q8NEZ5 (correlates with) LTF	-0.528249
O95302 (correlates with) CTSH	-0.528112
P78310 (correlates with) F2	-0.528077
P02751 (correlates with) F13A1	-0.528042
P01024 (correlates with) CD5L	-0.528028
O96009 (correlates with) AZU1	-0.528001
P68371 (correlates with) C2	-0.527968
P01876 (correlates with) PSMB9	-0.527875
P60900 (correlates with) FASN	-0.527754
P80748 (correlates with) KLKB1	-0.527594
P53634 (correlates with) CFI	-0.527563
Q9BRP4 (correlates with) CTSH	-0.527332
Q15904 (correlates with) CFB	-0.527303
O43396 (correlates with) C2	-0.527241
P14136 (correlates with) CLPP	-0.527216
P53680 (correlates with) CES1	-0.527162
Q10589 (correlates with) HP	-0.527148
O75695 (correlates with) HP	-0.52705
P69905 (correlates with) CLPP	-0.52704
Q96AY3 (correlates with) LTF	-0.527029
Q92692 (correlates with) PLG	-0.527027
P01031 (correlates with) FASN	-0.526995
P28065 (correlates with) F9	-0.526953
P28065 (correlates with) PSMA6	-0.526947
Q96AY3 (correlates with) F2	-0.526799
Q96AY3 (correlates with) CTSH	-0.526754
Q9P258 (correlates with) CFB	-0.526745
P02790 (correlates with) PRCP	-0.526677
P12110 (correlates with) KLKB1	-0.52667
P04433 (correlates with) PLD3	-0.526656
Q92688 (correlates with) DPP9	-0.52621
P04433 (correlates with) CFI	-0.526121
Q2TAY7 (correlates with) HP	-0.526119
P50552 (correlates with) PSMA6	-0.526115
P04196 (correlates with) CD163	-0.526108
Q15904 (correlates with) FASN	-0.52609
P10909 (correlates with) CD5L	-0.526006
Q8NEZ5 (correlates with) CTSH	-0.525946
Q9P258 (correlates with) HP	-0.525931
P51884 (correlates with) C1R	-0.525902
P55083 (correlates with) LTF	-0.525873
Q9H4G4 (correlates with) TPP2	-0.525826
P01042 (correlates with) AZU1	-0.525791
Q05707 (correlates with) ELANE	-0.525701
P10909 (correlates with) PRCP	-0.525696
P05091 (correlates with) C1R	-0.52568
P02751 (correlates with) CTSH	-0.52565
P20702 (correlates with) TPP2	-0.525397
P08185 (correlates with) C2	-0.525386
P10909 (correlates with) C1S	-0.525376
Q9UMS4 (correlates with) DPP9	-0.525285
P53634 (correlates with) HP	-0.525263
P04062 (correlates with) F13A1	-0.525158
Q9BR76 (correlates with) C1R	-0.525096
Q9UMS4 (correlates with) AZU1	-0.525061
Q92747 (correlates with) AZU1	-0.524683
P19827 (correlates with) LPA	-0.524434
Q709C8 (correlates with) F13A1	-0.52428
P01859 (correlates with) CES1	-0.524142
P01023 (correlates with) CES1	-0.524116
P05362 (correlates with) AZU1	-0.524089
Q8NEZ5 (correlates with) FASN	-0.523899
P01857 (correlates with) CD5L	-0.523856
Q9BRP4 (correlates with) SIAE	-0.523809
P53634 (correlates with) PLG	-0.52376
P01031 (correlates with) F13A1	-0.523751
Q04206 (correlates with) F13A1	-0.523709
Q96PD5 (correlates with) PLG	-0.523624
P01871 (correlates with) PREP	-0.523605
P17812 (correlates with) CTSH	-0.523522
Q9H4G4 (correlates with) C2	-0.523466
P56199 (correlates with) CFI	-0.523438
P01877 (correlates with) PREP	-0.523284
Q96AY3 (correlates with) FASN	-0.523231
P61916 (correlates with) C1S	-0.52316
P01714 (correlates with) PSMB9	-0.523141
P01011 (correlates with) PRCP	-0.523115
P10253 (correlates with) KLKB1	-0.523096
Q92945 (correlates with) F13A1	-0.523094
Q9H4G4 (correlates with) AZU1	-0.523059
Q92542 (correlates with) ELANE	-0.523047
P35442 (correlates with) PLG	-0.522945
P05362 (correlates with) CD163	-0.522897
P01877 (correlates with) C1S	-0.522863
P18428 (correlates with) CTSH	-0.522738
P68371 (correlates with) F9	-0.522708
Q9NVN3 (correlates with) LPA	-0.522694
Q16658 (correlates with) C2	-0.522673
O15533 (correlates with) TPP2	-0.522596
O75369 (correlates with) F9	-0.522522
P13645 (correlates with) TPP1	-0.522481
Q9C0C9 (correlates with) TPP2	-0.522388
P61586 (correlates with) F2	-0.522335
P11766 (correlates with) C1R	-0.522077
P56199 (correlates with) DPP4	-0.521963
P02751 (correlates with) F2	-0.521725
P01871 (correlates with) CD5L	-0.521619
P53680 (correlates with) F9	-0.521478
P21333 (correlates with) PREP	-0.52144
Q9P246 (correlates with) C1S	-0.521384
O75369 (correlates with) EFEMP1	-0.521345
P02671 (correlates with) LPA	-0.521336
Q16658 (correlates with) DPP9	-0.521253
P02765 (correlates with) PSMA6	-0.521163
Q96PD5 (correlates with) CFI	-0.521117
P50552 (correlates with) PREP	-0.521079
Q14767 (correlates with) TPP2	-0.520761
Q9UMS4 (correlates with) EFEMP1	-0.520729
P68371 (correlates with) KLKB1	-0.520666
P01714 (correlates with) CES1	-0.520565
P01714 (correlates with) C1R	-0.520485
P55083 (correlates with) CFB	-0.520483
Q9P258 (correlates with) TPP1	-0.52042
P05362 (correlates with) LPA	-0.520374
Q96CW1 (correlates with) CD5L	-0.520342
Q9P258 (correlates with) FASN	-0.52033
P02671 (correlates with) PRCP	-0.52033
Q92945 (correlates with) F2	-0.520298
P01042 (correlates with) EFEMP1	-0.520287
Q9P246 (correlates with) PRCP	-0.520247
P35442 (correlates with) PLD3	-0.520147
P12110 (correlates with) ELANE	-0.520138
P31483 (correlates with) TPP2	-0.520057
O43396 (correlates with) DPP9	-0.519825
Q9BR76 (correlates with) F9	-0.519825
P01861 (correlates with) CD5L	-0.519673
P01781 (correlates with) TPP1	-0.519495
P01860 (correlates with) CES1	-0.51941
Q96IY4 (correlates with) CTSH	-0.519385
P10909 (correlates with) C1R	-0.519334
P01861 (correlates with) C7	-0.519167
P25311 (correlates with) F9	-0.519142
P11766 (correlates with) LPA	-0.519116
P00325 (correlates with) PRCP	-0.51909
Q15904 (correlates with) F13A1	-0.519055
P62873 (correlates with) F2	-0.519049
P61916 (correlates with) PRCP	-0.519021
P01717 (correlates with) LTF	-0.518964
P01023 (correlates with) ELANE	-0.518944
O95302 (correlates with) PLD3	-0.518935
Q9BR76 (correlates with) PSMA6	-0.518894
Q92747 (correlates with) C7	-0.518848
P78310 (correlates with) FASN	-0.518706
P27169 (correlates with) PLD3	-0.518599
P61916 (correlates with) CD5L	-0.518422
P04062 (correlates with) CD163	-0.518165
Q16658 (correlates with) KLKB1	-0.518037
P10253 (correlates with) F9	-0.517968
Q96CW1 (correlates with) KLKB1	-0.517749
Q9UHD1 (correlates with) TPP2	-0.517708
Q969X5 (correlates with) F2	-0.517553
Q92688 (correlates with) F9	-0.517532
P61916 (correlates with) LPA	-0.51737
P62873 (correlates with) PLG	-0.517285
P17812 (correlates with) LTF	-0.517256
P04264 (correlates with) DPP4	-0.517113
P55884 (correlates with) CFI	-0.517074
P08185 (correlates with) CD163	-0.517013
P20702 (correlates with) C2	-0.516968
P04196 (correlates with) C7	-0.516966
P02790 (correlates with) CD5L	-0.516842
Q9BRP4 (correlates with) CFI	-0.516717
P23083 (correlates with) PLD3	-0.516689
Q92945 (correlates with) CTSH	-0.516684
Q9BR76 (correlates with) PLD3	-0.516572
P50552 (correlates with) DPP4	-0.516571
O75695 (correlates with) FASN	-0.516512
Q92542 (correlates with) TPP2	-0.516451
P01876 (correlates with) CD163	-0.516414
Q96CW1 (correlates with) F9	-0.516398
Q9UMS4 (correlates with) CD163	-0.516374
P60900 (correlates with) CFB	-0.516325
P05556 (correlates with) AZU1	-0.516317
P00450 (correlates with) CD163	-0.516113
P02751 (correlates with) HP	-0.516097
P01877 (correlates with) PSMB9	-0.516084
P01871 (correlates with) C1S	-0.516067
Q92973 (correlates with) CLPP	-0.51595
Q92747 (correlates with) F9	-0.515656
Q16706 (correlates with) MST1	-0.515653
Q16706 (correlates with) SCPEP1	-0.515653
P10253 (correlates with) EFEMP1	-0.515545
P17812 (correlates with) FASN	-0.515529
P53680 (correlates with) C7	-0.51549
P01877 (correlates with) PSMA6	-0.515436
P02765 (correlates with) PREP	-0.515385
P61586 (correlates with) PLG	-0.515355
P01042 (correlates with) KLKB1	-0.515342
P01023 (correlates with) KLKB1	-0.515252
P61916 (correlates with) C1R	-0.515163
P28161 (correlates with) CLPP	-0.515104
P22792 (correlates with) LTF	-0.515099
Q16531 (correlates with) C2	-0.515084
O75369 (correlates with) AZU1	-0.514935
P00441 (correlates with) SIAE	-0.514866
A4D1P6 (correlates with) LTF	-0.514382
P68371 (correlates with) EFEMP1	-0.514241
P51610 (correlates with) AZU1	-0.514168
P01859 (correlates with) C1R	-0.514151
O96009 (correlates with) PREP	-0.514149
Q92692 (correlates with) PLD3	-0.514077
P10909 (correlates with) LPA	-0.513988
P10253 (correlates with) C7	-0.51398
P04196 (correlates with) DPP9	-0.513968
Q9BY67 (correlates with) PLG	-0.513953
P13645 (correlates with) CD163	-0.51382
Q96IY4 (correlates with) F13A1	-0.51377
Q9UMS4 (correlates with) C7	-0.513733
Q9UHD1 (correlates with) PLG	-0.513708
Q15904 (correlates with) CTSH	-0.513692
P02671 (correlates with) C1S	-0.513664
P01042 (correlates with) C7	-0.513599
O95302 (correlates with) TPP1	-0.513486
P98082 (correlates with) HP	-0.513394
O75083 (correlates with) CES1	-0.513302
P01031 (correlates with) F2	-0.513298
P05091 (correlates with) SIAE	-0.513234
P40199 (correlates with) HP	-0.513155
P05362 (correlates with) DPP4	-0.513132
P01714 (correlates with) SIAE	-0.513117
P19827 (correlates with) PREP	-0.513104
Q99538 (correlates with) TPP2	-0.513093
P49407 (correlates with) F13A1	-0.512854
P51884 (correlates with) CES1	-0.512793
P05556 (correlates with) DPP9	-0.512721
A4D1P6 (correlates with) CFB	-0.512713
P05091 (correlates with) PRCP	-0.512687
P01781 (correlates with) DPP9	-0.512674
P18428 (correlates with) F13A1	-0.512564
P01031 (correlates with) CTSH	-0.512548
Q9UMS4 (correlates with) ELANE	-0.512514
P04264 (correlates with) CES1	-0.512421
Q04206 (correlates with) F2	-0.512389
O96009 (correlates with) ELANE	-0.512237
Q92542 (correlates with) CD5L	-0.512224
P80748 (correlates with) PRCP	-0.512118
Q92747 (correlates with) ELANE	-0.512041
P68371 (correlates with) C7	-0.511766
Q2TAY7 (correlates with) CFB	-0.511757
P27694 (correlates with) DPP9	-0.511702
P56199 (correlates with) CTSH	-0.511575
O95757 (correlates with) DPP4	-0.51153
Q92688 (correlates with) PSMA6	-0.511515
Q9H4G4 (correlates with) ELANE	-0.511479
Q9BQG0 (correlates with) FASN	-0.511463
P00325 (correlates with) CD5L	-0.511328
Q14767 (correlates with) CFI	-0.511323
P41091 (correlates with) PLG	-0.511249
O95757 (correlates with) FASN	-0.511175
O96009 (correlates with) KLKB1	-0.510946
Q9UBS4 (correlates with) LTF	-0.510863
P01876 (correlates with) AZU1	-0.510847
P01880 (correlates with) PLD3	-0.510814
Q9NVN3 (correlates with) C1S	-0.510776
P11766 (correlates with) CD163	-0.510752
Q2TAY7 (correlates with) LTF	-0.510728
Q10588 (correlates with) CFB	-0.510677
Q9NR30 (correlates with) HP	-0.510646
P13760 (correlates with) CD163	-0.510641
Q92542 (correlates with) KLKB1	-0.510586
P25311 (correlates with) SIAE	-0.510547
Q9UBS4 (correlates with) F13A1	-0.510104
O75369 (correlates with) C7	-0.510087
P25774 (correlates with) C7	-0.510059
P31483 (correlates with) C2	-0.51002
P22792 (correlates with) CFB	-0.509994
P01781 (correlates with) AZU1	-0.509932
P05362 (correlates with) KLKB1	-0.50992
P21333 (correlates with) AZU1	-0.509897
P10253 (correlates with) ELANE	-0.509841
Q8NEZ5 (correlates with) CFB	-0.509765
P04196 (correlates with) PRCP	-0.509579
P01717 (correlates with) FASN	-0.509562
Q8NEZ5 (correlates with) PLG	-0.509462
P01717 (correlates with) TPP1	-0.509418
O95302 (correlates with) F13A1	-0.509369
Q9NY65 (correlates with) PLD3	-0.509103
P01023 (correlates with) C1S	-0.509094
P84095 (correlates with) TPP1	-0.508989
Q96AY3 (correlates with) CFB	-0.50889
P12830 (correlates with) TPP1	-0.508889
Q16658 (correlates with) ELANE	-0.508798
P50552 (correlates with) PSMB9	-0.508604
P55083 (correlates with) FASN	-0.508457
Q9UBR2 (correlates with) CD163	-0.508445
P02671 (correlates with) PSMA6	-0.508429
Q9UMS4 (correlates with) KLKB1	-0.508302
P51610 (correlates with) KLKB1	-0.508286
Q9H4G4 (correlates with) KLKB1	-0.508269
P01042 (correlates with) PSMA6	-0.508049
P01880 (correlates with) FASN	-0.50794
P01861 (correlates with) EFEMP1	-0.507884
P01871 (correlates with) PRCP	-0.507849
Q92747 (correlates with) KLKB1	-0.507724
Q9BY67 (correlates with) HP	-0.507723
Q0VDF9 (correlates with) HP	-0.507624
P04433 (correlates with) TPP1	-0.507602
P50552 (correlates with) C1R	-0.507597
P04196 (correlates with) EFEMP1	-0.507589
P01861 (correlates with) PRCP	-0.507566
P04062 (correlates with) CFI	-0.507424
Q05707 (correlates with) C7	-0.50734
Q92542 (correlates with) CD163	-0.507242
Q709C8 (correlates with) CTSH	-0.5072
P04211 (correlates with) PLD3	-0.507164
P23083 (correlates with) TPP1	-0.507033
P12110 (correlates with) LPA	-0.507028
O43396 (correlates with) AZU1	-0.506726
P49407 (correlates with) CFI	-0.506608
Q86X55 (correlates with) PLD3	-0.506406
P01877 (correlates with) PAFAH1B1	-0.50626
Q16658 (correlates with) PLD3	-0.506159
P21333 (correlates with) CES1	-0.505919
Q10588 (correlates with) LTF	-0.505908
P01871 (correlates with) CES1	-0.505894
P12110 (correlates with) PSMA6	-0.505823
Q96PD5 (correlates with) TPP2	-0.50574
P00325 (correlates with) SIAE	-0.505642
Q9BRP4 (correlates with) TPP1	-0.505615
P05091 (correlates with) CD5L	-0.505426
P29966 (correlates with) LTF	-0.505388
P01876 (correlates with) PREP	-0.505233
P61916 (correlates with) PSMA6	-0.505185
P01717 (correlates with) CFB	-0.50518
P25311 (correlates with) DPP4	-0.504998
P29966 (correlates with) CTSH	-0.504991
P80748 (correlates with) C7	-0.504989
Q9UBS4 (correlates with) FASN	-0.504949
P08134 (correlates with) LTF	-0.504947
P01011 (correlates with) C1R	-0.504921
P27694 (correlates with) PLD3	-0.50491
P05362 (correlates with) ELANE	-0.50472
O14672 (correlates with) TPP2	-0.504669
P55083 (correlates with) HP	-0.504666
P13645 (correlates with) PLD3	-0.504483
P22792 (correlates with) HP	-0.50447
P08134 (correlates with) F13A1	-0.504373
P04217 (correlates with) CES1	-0.504371
Q9P246 (correlates with) PAFAH1B1	-0.504364
Q86X55 (correlates with) CTSH	-0.504351
P13645 (correlates with) LTF	-0.504305
P62873 (correlates with) TPP1	-0.504304
P56199 (correlates with) F9	-0.504184
Q9NVN3 (correlates with) EFEMP1	-0.504175
P12830 (correlates with) F9	-0.504171
O15533 (correlates with) CFB	-0.504118
P68371 (correlates with) ELANE	-0.504015
Q16531 (correlates with) DPP9	-0.503764
Q05707 (correlates with) C1R	-0.503681
P68371 (correlates with) C1R	-0.503643
P14780 (correlates with) PLG	-0.503631
Q9UBS4 (correlates with) CTSH	-0.503622
P05556 (correlates with) ELANE	-0.503587
P98082 (correlates with) FASN	-0.503474
P01023 (correlates with) CD5L	-0.503334
Q9UMS4 (correlates with) F9	-0.5032
P53680 (correlates with) CD5L	-0.503179
Q04206 (correlates with) CFI	-0.503126
Q8IUI8 (correlates with) FASN	-0.503114
P61916 (correlates with) CD163	-0.503109
P05556 (correlates with) EFEMP1	-0.503022
P05107 (correlates with) CFI	-0.502989
P78310 (correlates with) PSMA6	-0.502935
P12830 (correlates with) DPP9	-0.502928
P01876 (correlates with) C1S	-0.502911
P01857 (correlates with) SIAE	-0.502909
Q9BRP4 (correlates with) CD163	-0.502818
Q96IY4 (correlates with) HP	-0.50277
P23083 (correlates with) CTSH	-0.502761
Q9H4G4 (correlates with) CFI	-0.50268
P25311 (correlates with) EFEMP1	-0.502568
Q8TCT9 (correlates with) HP	-0.502567
P01860 (correlates with) PAFAH1B1	-0.502475
P25311 (correlates with) CD163	-0.50245
P56199 (correlates with) PSMA6	-0.502409
Q9NY65 (correlates with) CTSH	-0.502277
O95302 (correlates with) PLG	-0.502236
O43396 (correlates with) EFEMP1	-0.502159
P02750 (correlates with) F9	-0.502155
P05107 (correlates with) TPP2	-0.502127
P84095 (correlates with) DPP4	-0.502085
Q96AY3 (correlates with) TPP2	-0.501919
P01024 (correlates with) SIAE	-0.501823
P11766 (correlates with) PREP	-0.501762
P04062 (correlates with) C2	-0.50166
P46063 (correlates with) CTSH	-0.501624
P02671 (correlates with) PREP	-0.501615
O75369 (correlates with) KLKB1	-0.501464
P13645 (correlates with) CFB	-0.501453
P29966 (correlates with) FASN	-0.501437
P60900 (correlates with) TPP2	-0.501383
P01042 (correlates with) LPA	-0.501367
P11766 (correlates with) PSMA6	-0.501322
P68371 (correlates with) PSMA6	-0.501211
P05107 (correlates with) HP	-0.501139
P01717 (correlates with) CTSH	-0.501112
P04264 (correlates with) CTSH	-0.501023
O96009 (correlates with) C1S	-0.501005
P15144 (correlates with) F2	-0.500986
O14672 (correlates with) PLG	-0.500851
Q9P258 (correlates with) CTSH	-0.500782
P01042 (correlates with) ELANE	-0.500702
Q969X5 (correlates with) CFI	-0.500639
P35442 (correlates with) CFI	-0.500533
P01781 (correlates with) KLKB1	-0.500358
P10909 (correlates with) CD163	-0.500309
P05556 (correlates with) KLKB1	-0.500294
P68371 (correlates with) C1S	-0.500227
P25774 (correlates with) EFEMP1	-0.500049
P27169 (correlates with) TPP2	-0.500038
Q9BR76 (correlates with) AZU1	-0.499957
P12110 (correlates with) C1S	-0.499922
Q05048 (correlates with) LTF	-0.499801
P05556 (correlates with) C7	-0.499797
Q04206 (correlates with) PLD3	-0.499642
Q9BR76 (correlates with) C1S	-0.499621
P78310 (correlates with) F13A1	-0.499588
P49407 (correlates with) TPP1	-0.499378
Q9BRP4 (correlates with) F13A1	-0.499344
Q92542 (correlates with) C7	-0.499235
Q96TC7 (correlates with) HP	-0.499147
P01876 (correlates with) KLKB1	-0.499075
Q15904 (correlates with) F2	-0.499066
Q92542 (correlates with) DPP9	-0.498914
P01781 (correlates with) C2	-0.498684
P17812 (correlates with) CFB	-0.498672
P05155 (correlates with) CES1	-0.498631
P05362 (correlates with) PSMB9	-0.498612
Q8NEZ5 (correlates with) F2	-0.498377
[truncated: 1,800 more rows]
