# Supplementary material for: Depletion-dependent activity-based protein profiling using SWATH/DIA-MS detects serine hydrolase lipid remodeling in lung adenocarcinoma progression
Source: Nat Commun. 2025 May 27;16:4889. doi: 10.1038/s41467-025-59564-x (PMC12117057; doi:10.1038/s41467-025-59564-x)
Supplement: Supplementary file 11 — Supplementary Data 8 [file 41467_2025_59564_MOESM11_ESM.xlsx]

## Sheet: Exp1-FFA screening
Relative comparisons and profiling of FA levels obtained by a full scan untargeted UHPLC-HRMS Agilent QTOF system based on accurate mass and retention time matching (AMRT) to pure authentic standards analyzed under the same analytical conditions (Supplementary Note 3).
List of authentic standards in experiment 1
Saturated Fatty acids
Synonym	Name	Carbon/Ins	Sigma-Aldrich Ref	[M-H]- (m/z)	RT (min)	LongT-AVG PA (TIC normalized)	ShortT-AVG PA (TIC normalized)	LongT-PA normalized to tissue/protein content	ShortT-PA normalized to tissue/protein content	P value (two-sided T test)
Hexanoic	Caproic	C6:0	21529-5ML	115.076	0.51	na	na	na	na
Octanoic	Caprylic	C8:0	C2875	143.108	0.68	7308.34	7931.29	3032.51	4019.91	0.650815
Decanoic	Capric	C10:0	C1875	171.139	1.03	5211.42	6614.55	2162.41	3352.53	0.458377
Dodecanoic	Lauric	C12:0	W261408	199.1704	1.67	6531.41	3806.76	2710.13	1929.43	0.675616
Tetradecanoic	Myristic	C14:0	70082	227.2017	2.65	10154.4	10274.1	4213.43	5207.36	0.439714
Hexadecanoic	Palmitic	C16:0	P0500	255.2330	3.37	400665	276723	166251	140255	0.443754
Heptadecanoic	Margaric	C17:0	H3500	269.2486	3.71	na	na	na	na
Octadenoic	Stearic	C18:0	S4751	283.2643	4.08	651918	402090	270505	203796	0.397756
Eicosanoic	Arachidic	C20:0	A3631	311.2956	4.9	na	na	na	na
Docosanoic	Behenic	C22:0	216941	339.3269	5.8	na	na	na	na
Tetracosanoic	Lignoceric	C24:0	L6641	367.3582	6.8	na	na	na	na
Hexacosanoic acid	Cerotic	C26:0	H0388	395.3895	7.8	na	na	na	na
Monoenoic fatty acids
Synonym	Name	Carbon/Ins	Sigma-Aldrich Ref	M-H-	RT (min)	LongT-AVG peak area (TIC)	ShortT-AVG peak area (TIC)	LongT-normalized to tissue/protein content	ShortT-normalized to tissue/protein content
cis-9-hexadecenoic	Palmitoleic	C16:1 (n-7)	P9417	253.2173	2.87	20243.5	35400.5	8399.79	17942.5	* 0.020344
cis-6-octadecenoic	Petroselinic	C18:1 (n-6)	P8750	281.2486	3.58	na	na	na	na
cis-9-octadecenoic	Oleic	C18:1 (n-9)	O1008	281.2486	3.51	217676	322248	90321.9	163329	*0.020563
trans-9-octadecenoic	Elaidic	C18:1 (z-9)	E4637	281.2486	3.61	na	na	na	na
cis-11-octadecenoic	cis-vaccenic	C18:1 (n-7)	V0384	281.2486	3.49	na	na	na	na
cis-13-docodecenoic	Erucic	C22:1 (n-9)	E3385	337.3112	4.99	na	na	na	na
cis-15-tetracosenoic	Nervonic	C24:1 (n-9)	N1514	365.3425	5.89	na	na	na	na
Polyunsaturated fatty acids
Synonym	Name	Carbon/Ins	Sigma-Aldrich Ref	M-H-	RT (min)	LongT-AVG peak area (TIC)	ShortT-AVG peak area (TIC)	LongT-normalized to tissue/protein content	ShortT-normalized to tissue/protein content
9,12-octadecadienoic	Linoleic	18:2 (n-6)	L1012	279.2330	3.08	122286	213672	50741.2	108298	0.05014
6,9,12-octadecatrienoic	y-linolenic	18:3 (n-6)	62174-100MG-F	277.2173	2.67	3383.58	3802.26	1403.98	1927.14	0.42177
9,12,15-octadecatrienoic	a-linolenic	18:3 (n-3)	L2376	277.2173	2.59	5307.97	9512.25	2202.48	4821.21	0.16571
5,8,11,14-eicosatetraenoic	arachidonic	20:4 (n-6)	23401-50MG	303.2330	3.01	257476	387040	106837	196168	0.169416
5,8,11,14-17-eicosapentaenoic	Eicosapentaenoic	20:5 (n-3)	E2011	301.2173	2.49	9269.8	22122.2	3846.39	11212.4	**0.00406
4,7,10,13,16,19-docosahexaenoic	Docosahexaenoic	22:6 (n-3)	D2534	327.2330	2.87	21386.1	37581.4	8873.89	19047.9	0.140031
PA -Peak Area
AVG- Average
TIC- Total Ion Current
na - not annotated

## Sheet: Exp1-Original Peak Areas
	Raw data peak area normilized to TIC	Sample ID	Peak Area (Ion Counts)														Prot µg/µL
			Octanoic acid, C8:0	Decanoic acid, C10:0	Dodecanoic acid, C12:0	Eicosapentaenoic acid, C20:5	alpha-Linolenic Acid, C18:3	Tetradecanoic acid, C14:0	gamma-Linolenic Acid, C18:3	Docosahexaenoic acid, C22:6	Palmitoleic acid, C16:1	Arachidonic Acid, C20:4	Linoleic acid, C18:2	Hexadecanoic acid, C16:0	Oleic acid&Vaccenic acid, C18:1	Octadecanoic acid, C18:0
		TS_FFA_102022_4	4615.64	5028.59	2594.1	11884	5108.99	7360.36	2150.75	15259.3	25816.6	230566	108595	446960	273817	599061	2.40878
		TS_FFA_102022_2	9971.52	7990.69	5247.03	4901.46	2635.87	9855.36	2114.7	10378.7	14899.5	90736.6	45337.9	502412	110726	921611	3.40958
		TS_FFA_102022_3	2407.68	2036.31	19402.8	17527.4	13332.6	17777.3	4274.15	21721	33207	537069	261067	209739	329960	269297	2.92841
		TS_FFA_102022_5	12622.2	5111.81	3582.03	10632.7	4261.28	9833.09	7799.59	57170.9	27285.3	395641	168879	263959	322915	449125	2.14319
		TS_FFA_102022_1	6924.67	5889.68	1831.11	1403.45	1201.13	5945.74	578.715	2400.46	9.1126	33367.4	27552	580255	50961.8	1.0205e+06	1.17321
		LongT AVG	7308.34	5211.42	6531.41	9269.8	5307.97	10154.4	3383.58	21386.1	20243.5	257476	122286	400665	217676	651918	2.41263
		TS_FFA_102022__9	12192	12890.5	6775.29	19575.6	6467.96	13334.1	4337.27	31465	42159.2	274987	132922	330072	234081	617559	1.83141
		TS_FFA_102022__7	6897.82	6625.87	5070.19	17323.9	5201.44	9390.61	3173.1	24072.2	45076.5	222054	131054	356854	312231	593792	1.8776
		TS_FFA_102022__6	5392.91	3224.12	2258.41	30607.1	6043.8	4325.06	3022.28	61193.9	21777	699743	196484	209474	284051	211220	1.70648
		TS_FFA_102022__10	8111.09	6069.75	2656.31	23251	5456.03	13830	3589.44	49062.2	41880.2	482292	203905	242699	335288	320727	2.12009
		TS_FFA_102022__8	7062.6	4262.5	2273.6	19853.3	24392	10490.9	4889.18	22113.8	26109.6	256124	403993	244516	445587	267150	2.32987
		ShortT AVG	7931.29	6614.55	3806.76	22122.2	9512.25	10274.1	3802.26	37581.4	35400.5	387040	213672	276723	322248	402090	1.97309
	Raw data peak area	SampleId	Peak Area (Ion Counts)
		Long Tumor	Octanoic acid, C8:0	Decanoic acid, C10:0	Dodecanoic acid, C12:0	Eicosapentaenoic acid, C20:5	alpha-Linolenic Acid, C18:3	Tetradecanoic acid, C14:0	gamma-Linolenic Acid, C18:3	Docosahexaenoic acid, C22:6	Palmitoleic acid, C16:1	Arachidonic Acid, C20:4	Linoleic acid, C18:2	Hexadecanoic acid, C16:0	Vaccenic acid&Oleic acid, C18:1	Octadecanoic acid, C18:0
		TS_FFA_102022__4	4957.05	5400.55	2785.98	12763	5486.9	7904.8	2309.84	16388	27726.2	247621	116628	480021	294071	643373
		TS_FFA_102022__2	5829.28	4671.3	3067.38	2865.36	1540.91	5761.37	1236.24	6067.32	8710.12	53044	26504.2	293707	64729.6	538767
		TS_FFA_102022__3	5618.92	4752.23	45281.2	40904.4	31114.9	41487.8	9974.78	50691.2	77496.8	1.25338e+06	609265	489478	770042	628471
		TS_FFA_102022__5	6744.36	2731.37	1913.97	5681.34	2276.91	5254.07	4167.52	30547.9	14579.2	211401	90236.2	141040	172542	239979
		TS_FFA_102022__1	6715.09	5711.43	1775.69	1360.97	1164.78	5765.79	561.2	2327.81	8.8368	32357.5	26718.1	562693	49419.4	989611
		LongT AVG	5972.94	4653.38	10964.8	12715	8316.87	13234.8	3649.92	21204.5	25704.2	359561	173870	393388	270161	608040
		Short Tumor
		TS_FFA_102022__9	4359.84	4609.61	2422.83	7000.18	2312.93	4768.24	1551	11251.8	15076	98334.6	47532.7	118033	83706.8	220837
		TS_FFA_102022__7	5487.61	5271.26	4033.62	13782.1	4138.05	7470.77	2524.38	19150.8	35860.9	176657	104261	283898	248398	472396
		TS_FFA_102022__6	5792.76	3463.17	2425.86	32876.4	6491.92	4645.73	3246.37	65731.1	23391.7	751625	211053	225005	305112	226881
		TS_FFA_102022__10	7992.63	5981.11	2617.52	22911.5	5376.35	13628	3537.03	48345.7	41268.6	475249	200927	239155	330391	316043
		TS_FFA_102022__8	8416.24	5079.46	2709.36	23658.4	29067	12501.6	5826.25	26352.1	31113.8	305213	481424	291380	530990	318353
		ShortT AVG	6409.82	4880.92	2841.84	20045.7	9477.25	8602.87	3337	34166.3	29342.2	361416	209039	231494	299720	310902

## Sheet: Exp2 - Abs. Conc. 
Absolute quantification of four FA of interest by external calibration curves based on the acquisition of pure authentic standards (AS) against the isotopically labelled internal standard were used.(Supplementary Note 4)
Sample_ID	EICOSAPENTANOIC ACID	HEXADECANOIC ACID	OLEIC ACID	PALMITOLEIC ACID	Protein
	[µM]	[µM]	[µM]	[µM]	[µg]
TS_FFA_072024_LongT	N.D (0.005)	N.D (1.5)	0.607	N.D (0.01)	2.14319
TS_FFA_072024_LongT	N.D (0.012)	N.D (0.9)	0.759	N.D (0.01)	1.70648
TS_FFA_072024_LongT	0.337	7.594	9.501	1.734	5.40958
TS_FFA_072024_LongT	0.096	5.347	4.886	0.793	2.92841
TS_FFA_072024_LongT	N.D (0.04)	3.644	2.587	0.549	2.40878
TS_FFA_072024_ShortT	0.29	4.968	4.696	0.6	1.8776
TS_FFA_072024_ShortT	0.117	3.402	3.925	0.8	1.83141
TS_FFA_072024_ShortT	0.197	6.482	6.163	0.903	2.32987
TS_FFA_072024_ShortT	0.041	2.12	1.31	N.D (0.01)	1.17321
TS_FFA_072024_ShortT	0.203	5.335	4.954	1.005	2.12009
N.D. non detected
< Limite of detection (LOD)
